# Supplementary material for: Multicomponent Synthesis of α-Branched Amines via a Zinc-Mediated Carbonyl Alkylative Amination Reaction
Source: PubMed Central journal article supplement (PMC10996026; doi:10.1021/jacs.3c14037), 2024-03-15

# **Multicomponent Synthesis of $\alpha$ -Branched Amines via a Zinc-Mediated Carbonyl Alkylative Amination Reaction**

Joseph M. Phelps, Roopender Kumar, James D. Robinson, John C. K. Chu, Nils J. Flodén, Sarah Beaton and Matthew J. Gaunt\*

Yusuf Hamied Department of Chemistry, University of Cambridge, Lensfield Road, Cambridge  
CB2 1EW

Email: [mjg32@cam.ac.uk](mailto:mjg32@cam.ac.uk)

## Contents

|                                                                                           |    |
|-------------------------------------------------------------------------------------------|----|
| 1. General Experimental.....                                                              | 3  |
| 1.1. Solvents and reagents .....                                                          | 3  |
| 1.2. Chromatography and Data Analysis.....                                                | 3  |
| 2. Reaction Optimization .....                                                            | 4  |
| 2.1. Optimization reactions procedure .....                                               | 4  |
| 2.2. Optimization summary .....                                                           | 4  |
| 2.3. Zinc source optimization general procedure .....                                     | 6  |
| 3. Reductive Amination Control Experiments.....                                           | 7  |
| 3.1. Procedure A: Zinc-mediated carbonyl alkylative amination.....                        | 7  |
| 3.2. Procedure B: Si/hv-mediated carbonyl alkylative amination.....                       | 7  |
| 3.3. Reductive amination control experiments .....                                        | 8  |
| 3.4. Synthesis of reductive amination standards.....                                      | 9  |
| 4. Reaction procedures .....                                                              | 11 |
| 4.1. <b>General procedure A</b> (amine hydrochloride salts) .....                         | 11 |
| 4.2. <b>General procedure B</b> (free amine) .....                                        | 11 |
| 4.3. <b>General procedure C</b> (aldehyde scope) .....                                    | 11 |
| 4.4. <b>Acid-Base wash (ABW) procedure</b> .....                                          | 12 |
| 4.5. General notes on zinc-mediated carbonyl alkylative amination.....                    | 12 |
| 5. Reaction scope .....                                                                   | 13 |
| 5.1. Amine scope .....                                                                    | 13 |
| 5.2. Aldehyde scope.....                                                                  | 37 |
| 5.3. Alkyl halide scope .....                                                             | 47 |
| 6. High-throughput experimentation (HTE) .....                                            | 59 |
| 6.1. HTE general experimental .....                                                       | 59 |
| 6.2. Solvent screening .....                                                              | 60 |
| 6.3. Zinc scavenging optimization .....                                                   | 64 |
| <b>6.4. General procedure D</b> (Modified NanoNest design and plate sealing method) ..... | 64 |
| 6.5. Multi-amine array validation experiment .....                                        | 70 |
| 6.6. Multi-alkyl halide array validation experiment .....                                 | 71 |
| 6.7. Scavenger resin purification optimization .....                                      | 72 |
| 6.8. High-throughput reaction screening (primary iodide optimization) .....               | 77 |

|       |                                                                          |     |
|-------|--------------------------------------------------------------------------|-----|
| 7.    | CuI assisted Zn-mediated carbonyl alkylative amination.....              | 79  |
| 7.1.  | <b>General procedure E</b> (primary alkyl iodides & benzaldehydes) ..... | 79  |
| 7.2.  | Expanded scope .....                                                     | 80  |
| 7.3.  | Tertiary alkyl halide optimization .....                                 | 92  |
| 8.    | Redox active esters as alkylating feedstocks .....                       | 96  |
| 8.1.  | <b>General procedure F</b> (synthesis of redox active esters) .....      | 96  |
| 8.2.  | Redox active ester characterisation .....                                | 96  |
| 8.3.  | <b>General procedure G</b> (redox active esters) .....                   | 103 |
| 8.4.  | Redox active ester reaction scope .....                                  | 104 |
| 9.    | Synthesis of $\alpha$ -tertiary amines .....                             | 113 |
| 9.1.  | Reaction optimization: $\alpha$ -tertiary amine synthesis.....           | 113 |
| 9.2.  | Reaction optimization: amino-oxetane synthesis .....                     | 114 |
| 9.3.  | <b>General procedures H-J</b> ( $\alpha$ -tertiary amines) .....         | 118 |
| 9.4.  | $\alpha$ -Tertiary amines reaction scope.....                            | 119 |
| 10.   | Mechanistic investigations and control experiments .....                 | 138 |
| 10.1. | <b>General procedure K-M</b> (Synthesis of alkyl-zinc reagents) .....    | 138 |
| 10.2. | Reactivity of alkyl-zinc experiments.....                                | 140 |
| 10.3. | Formation of alkyl-zinc species under standard reaction conditions ..... | 143 |
| 10.4. | Radical trapping experiments .....                                       | 144 |
| 10.5. | Radical clock experiments .....                                          | 153 |
| 10.6. | Radical cyclisation radical aminyl cation trapping experiments .....     | 157 |
| 11.   | Additional Scope.....                                                    | 174 |
| 12.   | References .....                                                         | 177 |
| 13.   | NMR Spectra .....                                                        | 180 |

# 1. General Experimental

## 1.1 Solvents and Reagents

All reactions were run under an inert atmosphere ( $N_2$ ) unless otherwise stated, with oven-dried glassware, using standard techniques. Anhydrous solvents were obtained from solvent stills ( $Et_2O$  was distilled from sodium triphenylmethane ketyl; THF from Na/benzophenone; MeCN, dichloromethane, and hexane from  $CaH_2$ ). Anhydrous EtOAc, toluene and 1,4-dioxane were purchased. Aldehydes and ketones were used as supplied if sufficiently pure, otherwise they were purified either by distillation or column chromatography and used immediately. All amines and alkyl halides were used as supplied if sufficiently pure, otherwise they were purified either by distillation or silica column chromatography and used immediately. All commercial reagents were used as supplied unless otherwise stated. Petroleum ether 40° - 60° was used in all cases where the Pet. Ether abbreviation is used. TBSOTf and TMSOTf were purchased from Sigma Aldrich and used as supplied. All other commercial reagents were used as supplied unless otherwise stated.

## 1.2 Chromatography and Data Analysis

Analytical thin-layer chromatography (TLC) was performed on Merck Kieselgel 60 F254 0.20 mm precoated, glass backed silica gel plates. Visualization of the developed chromatogram was performed by UV absorbance ( $\lambda_{max} = 254$  nm), and/or by aqueous  $KMnO_4$ . Flash column chromatography was performed using silica gel (Merck Geduran Si 60 [40–63  $\mu m$ ]) with the indicated solvent system or performed on a Teledyne ISCO CombiFlash nextgen 300+ using Redisep silica or Redisep gold silica high performance cartridges unless stated. Reverse phase column chromatography was performed on a Teledyne ISCO CombiFlash nextgen using C18 Redisep RF gold cartridges.

Nuclear magnetic resonance (NMR) spectra were recorded on a Bruker AM 400 (400 MHz) or Avance 500 (500 MHz) spectrometer or Avance 700 (700 MHz). Chemical shifts ( $\delta$ ) for  $^1H$  NMR spectra are recorded in ppm from  $Me_4Si$  with the solvent resonance as the internal standard ( $CDCl_3 = 7.26$  ppm,  $DMSO-d_6 = 2.50$ ,  $C_6D_6 = 7.16$  ppm,  $CD_3OD = 3.31$  ppm). Data is reported as follows: chemical shift [integration, multiplicity (s = singlet, d = doublet, t = triplet, q = quartet, quint = quintet, sext = sextet, sept = septet, m = multiplet, br = broad), coupling constant and proton count].  $^{13}C$  NMR spectra are reported in ppm from  $Me_4Si$  with the solvent resonance as the internal standard ( $CDCl_3 = 77.16$  ppm,  $DMSO-d_6 = 39.52$ ,  $C_6D_6 = 128.06$  ppm,  $CD_3OD = 49.00$  ppm).  $^{19}F$  NMR spectra are reported in ppm from  $CFC_3$  and are uncorrected.

High-resolution mass spectra (HRMS) were measured on a Micromass Q-TOF or on a Shimadzu QTOF LCMS-9030 spectrometer using ESI (electrospray ionisation) techniques at the Department of Chemistry, University of Cambridge.

Infrared (IR) spectra were recorded on a Perkin Elmer 1FT-IR Spectrometer or a Nicolet Summit PRO FTIR Spectrometer fitted with an ATR sampling accessory as solids or films, either through direct application or deposited in  $CHCl_3$ , with absorptions reported in wavenumbers ( $cm^{-1}$ ). Melting points (mp) were recorded using a Gallenkamp melting point apparatus and are reported uncorrected.

## 2. Reaction optimization

### 2.1 Optimization reactions procedure

An oven dried vial (Biotage Microwave Process Vial (10 mL), equipped with gas-tight pierceable caps) was charged with a stirring bar, Zn dust and amine hydrochloride salt if used. The vial was sealed, evacuated, and backfilled with N<sub>2</sub>. To this was added solvent, followed by the aldehyde and the alkyl iodide. The reaction mixture was stirred for one minute, followed by the addition of TMSOTf. The reaction mixture was stirred overnight. The crude mixture was transferred into a 50 mL round bottom flask and diluted with dichloromethane (approximately 20 mL). NaOH (approximately 15 mL, 10% aq.) was added. The heterogenous mixture was vigorously stirred for 10-15 min. The aqueous layer was extracted with dichloromethane three times. The combined organic layer was dried over anhydrous MgSO<sub>4</sub> or Na<sub>2</sub>SO<sub>4</sub>. Solvent was evaporated under reduced pressure. Yields were then determined by <sup>1</sup>H NMR using 1,1,2,2-tetrachloroethane as internal standard.

### 2.2 Optimization summary

**Table S1.** Optimization studies and control reactions (0.4 mmol scale)

| Entry           | 1a / 2a / 3a (equiv) | Reductant      | Acid                                           | Solvent                         | [Conc] | Yield / % |
|-----------------|----------------------|----------------|------------------------------------------------|---------------------------------|--------|-----------|
| 1               | 1.0 / 2.0 / 3.0      | Mn (2.0 equiv) | TMSOTf (1.0 equiv)                             | CH <sub>2</sub> Cl <sub>2</sub> | 0.2 M  | 2         |
| 2               | 1.0 / 2.0 / 3.0      | In (2.0 equiv) | TMSOTf (1.0 equiv)                             | CH <sub>2</sub> Cl <sub>2</sub> | 0.2 M  | 28        |
| 3               | 1.0 / 2.0 / 3.0      | Zn (2.0 equiv) | TMSOTf (1.0 equiv)                             | CH <sub>2</sub> Cl <sub>2</sub> | 0.2 M  | 48        |
| 4               | 1.0 / 2.0 / 3.0      | Zn (2.0 equiv) | TMSOTf (2.0 equiv)                             | CH <sub>2</sub> Cl <sub>2</sub> | 0.2 M  | >99       |
| 5               | 1.0 / 2.0 / 3.0      | Zn (2.0 equiv) | TMSOTf (2.0 equiv)                             | EtOAc                           | 0.2 M  | >99       |
| 6               | 1.0 / 2.0 / 3.0      | Zn (2.0 equiv) | TBSOTf (2.0 equiv)                             | EtOAc                           | 0.2 M  | 87        |
| 7               | 1.0 / 2.0 / 3.0      | Zn (2.0 equiv) | TMSCl (2.0 equiv)                              | EtOAc                           | 0.2 M  | 93        |
| 8               | 1.0 / 2.0 / 3.0      | Zn (2.0 equiv) | TFA (2.0 equiv)                                | EtOAc                           | 0.2 M  | 45        |
| 9               | 1.0 / 2.0 / 3.0      | Zn (2.0 equiv) | BF <sub>3</sub> .Et <sub>2</sub> O (2.0 equiv) | EtOAc                           | 0.2 M  | trace     |
| 10 <sup>b</sup> | 1.0 / 2.0 / 3.0      | Zn (2.0 equiv) | TMSOTf (2.0 equiv)                             | EtOAc                           | 0.2 M  | 65        |
| 11 <sup>b</sup> | 1.0 / 2.0 / 3.0      | Zn (2.0 equiv) | TMSOTf (1.0 equiv)                             | EtOAc                           | 0.2 M  | 84        |
| 12              | 1.0 / 2.0 / 3.0      | Zn (2.0 equiv) | TMSOTf (1.0 equiv)                             | Dioxane                         | 0.2 M  | 73        |
| 13              | 1.0 / 2.0 / 3.0      | Zn (2.0 equiv) | TMSOTf (1.0 equiv)                             | MeCN                            | 0.2 M  | 90        |
| 14              | 1.0 / 1.5 / 3.0      | Zn (2.0 equiv) | TMSOTf (2.0 equiv)                             | EtOAc                           | 0.2 M  | 65        |

|    |                 |                |                    |       |       |     |
|----|-----------------|----------------|--------------------|-------|-------|-----|
| 15 | 1.0 / 2.0 / 2.5 | Zn (2.0 equiv) | TMSOTf (2.0 equiv) | EtOAc | 0.2 M | >99 |
| 16 | 1.0 / 1.5 / 2.5 | Zn (2.0 equiv) | TMSOTf (2.0 equiv) | EtOAc | 0.2 M | 25  |
| 17 | 1.0 / 2.0 / 2.5 | Zn (1.5 equiv) | TMSOTf (2.0 equiv) | EtOAc | 0.2 M | 40  |
| 18 | 1.0 / 2.0 / 2.5 | Zn (3.0 equiv) | TMSOTf (2.0 equiv) | EtOAc | 0.2 M | 90  |
| 19 | 1.0 / 2.0 / 3.0 | Zn (2.0 equiv) | TMSOTf (1.0 equiv) | EtOAc | 0.2 M | 84  |
| 20 | 1.0 / 1.5 / 3.0 | Zn (2.0 equiv) | TMSOTf (1.0 equiv) | EtOAc | 0.4 M | 93  |
| 21 | 1.0 / 2.0 / 3.0 | Zn (2.0 equiv) | TMSOTf (0.5 equiv) | EtOAc | 0.2 M | 74  |
| 22 | 1.0 / 1.5 / 3.0 | Zn (2.0 equiv) | TMSOTf (0.5 equiv) | EtOAc | 0.4 M | 99  |
| 23 | 1.0 / 2.0 / 3.0 | Zn (2.0 equiv) | TMSOTf (1.0 equiv) | EtOAc | 0.4 M | >99 |
| 24 | 1.0 / 1.5 / 3.0 | Zn (2.0 equiv) | TMSOTf (2.0 equiv) | EtOAc | 0.4 M | >99 |
| 25 | 1.0 / 1.5 / 2.5 | Zn (2.0 equiv) | TMSOTf (2.0 equiv) | EtOAc | 0.4 M | 99  |
| 26 | 1.0 / 2.0 / 3.0 | Zn (2.0 equiv) | TMSOTf (2.0 equiv) | THF   | 0.2 M | 50  |
| 27 | 1.0 / 2.0 / 3.0 | Zn (2.0 equiv) | TMSOTf (2.0 equiv) | DMF   | 0.2 M | 70  |
| 28 | 1.0 / 2.0 / 3.0 | Zn (2.0 equiv) | TMSOTf (2.0 equiv) | DMSO  | 0.2 M | 24  |

<sup>a</sup> Yields were determined by <sup>1</sup>H NMR using 1,1,2,2-tetrachloroethane as internal standard. <sup>b</sup> Amine hydrochloride salt used.

### 2.3 Zinc source optimization: general procedure

An oven dried vial (Biotage Microwave Process Vial (10 mL), equipped with gas-tight pierceable caps) was charged with a stirring bar and zinc source (0.8 mmol, 2 equiv). The vial was sealed, evacuated, and backfilled with N<sub>2</sub>. To this was added EtOAc (1 mL), followed by the N-methyl-benzylamine (52  $\mu$ L, 0.4 mmol, 1 equiv), hydrocinnamaldehyde (79  $\mu$ L, 0.6 mmol, 1.5 equiv) and 2-iodopropane (100  $\mu$ L, 1.2 mmol, 2.5 equiv). The reaction mixture was stirred for one minute, followed by the addition of TMSOTf (144  $\mu$ L, 0.8 mmol, 2 equiv). The reaction mixture was stirred overnight. The crude mixture was transferred into a 50 ml round bottom flask and diluted with dichloromethane (approximately 20 mL). NaOH (approximately 15 mL, 10% aq.) was added. The heterogenous mixture was vigorously stirred for 10-15 min. The aqueous layer was extracted with dichloromethane three times. The combined organic layer was dried over anhydrous MgSO<sub>4</sub>. Solvent was evaporated under reduced pressure. Yields were then determined by <sup>1</sup>H NMR using 1,1,2,2-tetrachloroethane as internal standard.

**Table S2.** Optimization studies and control reactions (0.4 mmol scale)

| Zinc source                                                                                                 | Yield / % |
|-------------------------------------------------------------------------------------------------------------|-----------|
| Zinc dust, $\geq$ 98% purity (<10 $\mu$ m particle size, Sigma Aldrich)                                     | >99       |
| Nanoparticulate zinc, >99% purity (40-60 nm particle size, Sigma Aldrich)                                   | 18        |
| Zinc dust, >99.9995% purity (trace metal basis), (<150 $\mu$ m particle size, Strem Chemicals)              | 89        |
| Zinc powder, 99.999% purity, (<400 $\mu$ m particle size, Sigma Aldrich)                                    | 93        |
| Zinc-Copper Couple, $\geq$ 98% Zn, $\leq$ 2% Cu, powder (undefined particle size, Thermofischer Scientific) | >99       |

### 3. Reductive amination control experiments

#### 3.1 Procedure A: Zinc-mediated carbonyl alkylative amination

An oven dried vial (10 mL), equipped with gas-tight pierceable cap, was charged with a stirring bar and Zn dust (52 mg, 0.8 mmol, 2 equiv). The vial was sealed, evacuated, and backfilled with N<sub>2</sub>. To this was added dry EtOAc (2 mL), followed by the amine (0.4 mmol, 1.0 equiv), the hydrocinamaldehyde (0.8 mmol, 2.0 equiv) and the 2-iodopropane (1.2 mmol, 3 equiv). The reaction mixture was stirred for one minute, followed by the addition of TMSOTf (144 μL, 0.4 mmol, 2.0 equiv). The reaction mixture was stirred overnight. The crude mixture was transferred into a 50 mL round bottom flask and diluted with dichloromethane (approximately 20 mL). NaOH (approximately 15 mL, 10% aq.) was added. The heterogenous mixture was vigorously stirred for 10-15 min. The aqueous layer was extracted with dichloromethane three times. The combined organic layer was dried over anhydrous MgSO<sub>4</sub> or Na<sub>2</sub>SO<sub>4</sub>. Solvent was evaporated under reduced pressure. Yield of the product and reductive amination by-product was determined by <sup>1</sup>H NMR using 1,1,2,2-tetrachloroethane as internal standard.

#### 3.2 Procedure B: Si/hν-mediated carbonyl alkylative amination

An oven dried vial (10 mL), equipped with gas-tight pierceable cap, was charged with a stir bar and 4 Å MS (300 mg). The vial was sealed, evacuated, and backfilled three times with N<sub>2</sub>. To this was added dry dichloromethane (0.033 M) followed by addition of amine (0.2 mmol, 1 equiv), hydrocinamaldehyde (0.8 mmol, 2.0 equiv) and the 2-iodopropane (1.2 mmol, 3 equiv), tris(trimethylsilyl)silane (2 equiv) and TBSOTf (1 equiv). The reaction mixture was irradiated using a 40 W blue LED lamp (Kessil A160WE Tuna Blue) with vigorous stirring for 16 h at room temperature. The reaction mixture was filtered and transferred into a 50 mL round bottom flask, 10 mL hexane was added, and the solvent was removed in vacuo resulting in a light yellowish gummy solid which was rinsed with hexane (5 mL x 3). Dichloromethane (15 mL) was added, and the solution was neutralized upon stirring with NaOH (10 mL, 10% aq.) for 30 minutes. The resulting solution was transferred to a separating funnel and organic layer was separated by dichloromethane (15 mL x 3). The organic phase was dried over anhydrous MgSO<sub>4</sub>, and the solvent removed under reduced pressure. Yield of the product and reductive amination by-product was determined by <sup>1</sup>H NMR using 1,1,2,2- tetrachloroethane as internal standard.



### 3.3 Reductive amination control experiments

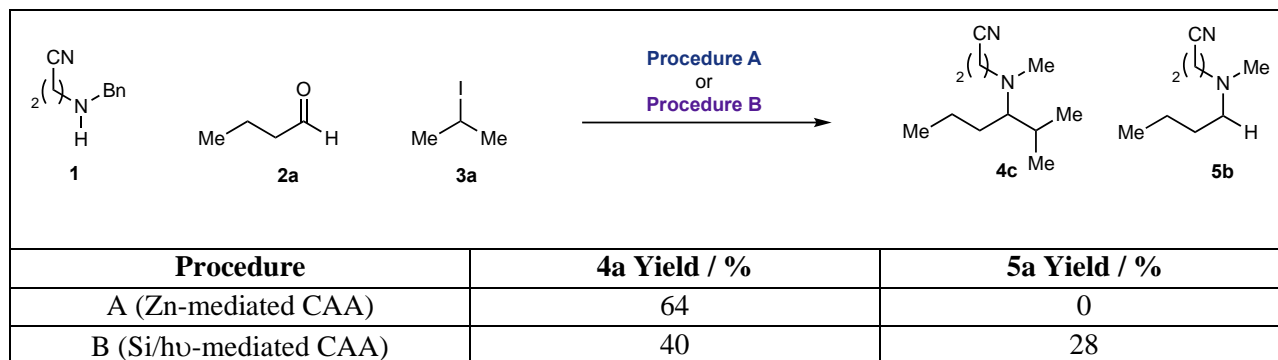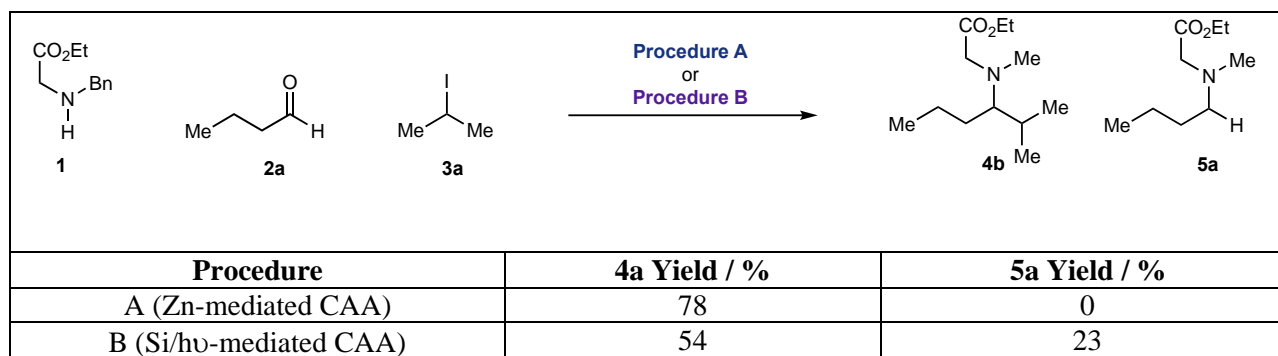

### 3.4 Synthesis of reductive amination standards

#### (ethyl N-benzyl-N-butylglycinate) (5a)

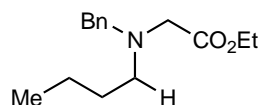

An oven dried vial (Biotage Microwave Process Vial (10 mL), equipped with gas-tight pierceable caps) was charged with a stirring bar, the N-benzylglycine ethyl ester (75  $\mu$ L, 0.4 mmol, 1 equiv) and butyraldehyde (36  $\mu$ L, 0.4 mmol, 1 equiv). The vial was sealed, evacuated and backfilled with  $N_2$ . To this was added dry DCE (1.0 mL). The vial was uncapped and then sodium triacetoxyborohydride (118 mg, 0.56 mmol, 1.4 equiv) was added. The vial was recapped and placed back under  $N_2$  with vacuum back-refills. The reaction mixture was stirred for 24 h. The crude mixture was transferred into a 50 ml round bottom flask, then NaOH (approximately 15 mL, 10% aq.) and  $Et_2O$  (approximately 15 mL) was added. The heterogenous mixture was vigorously stirred for 10-15 min. The aqueous layer was extracted with  $Et_2O$  three times. The combined organic layer was dried over anhydrous  $MgSO_4$ . Solvent was evaporated *in vacuo*. Crude material was purified by column chromatography (0-15% EtOAc in Pet. Ether) yielding the product as a colourless oil (65 mg, 65% yield).

**$^1H$  NMR** (500 MHz,  $CDCl_3$ )  $\delta$  7.36 – 7.28 (m, 4H), 7.27 – 7.21 (m, 1H), 4.17 (d,  $J = 7.2$  Hz, 1H), 4.14 (d,  $J = 7.2$  Hz, 1H), 3.77 (s, 2H), 3.29 (s, 2H), 2.69 – 2.55 (m, 2H), 1.53 – 1.42 (m, 2H), 1.36 – 1.29 (m, 2H), 1.26 (t,  $J = 7.1$  Hz, 3H), 0.96 – 0.81 (m, 4H).

**$^{13}C$  NMR** (126 MHz,  $CDCl_3$ )  $\delta$  171.6, 139.2, 128.9, 128.2, 127.0, 60.2, 58.2, 54.3, 53.6, 29.7, 20.4, 14.3, 14.0.

**IR** (film,  $cm^{-1}$ ): 2956, 2930, 2871, 1743, 1452, 1368, 1646, 1027, 734, 697.

**HRMS:**  $m/z$  calculated for  $C_{15}H_{24}NO_2$   $[M+H]^+$  250.1807; found 250.1804.

**(3-(benzyl(butyl)amino)propanenitrile) (5b)**

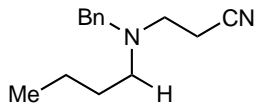

An oven dried vial (Biotage Microwave Process Vial (10 mL), equipped with gas-tight pierceable caps) was charged with a stirring bar, the 3-(benzylamino)propionitrile (62  $\mu$ L, 0.4 mmol, 1 equiv) and butyraldehyde (36  $\mu$ L, 0.4 mmol, 1 equiv). The vial was sealed, evacuated and backfilled with  $N_2$ . To this was added dry DCE (1.0 ml). The vial was uncapped and then sodium triacetoxyborohydride (118 mg, 0.56 mmol, 1.4 equiv) was added. The vial was recapped and placed back under  $N_2$  with vacuum back-refills. The reaction mixture was stirred for 24 h. The crude mixture was transferred into a 50 ml round bottom flask, then NaOH (approximately 15 ml, 10% aq.) and  $Et_2O$  (approximately 15 mL) was added. The heterogenous mixture was vigorously stirred for 10-15 min. The aqueous layer was extracted with  $Et_2O$  three times. The combined organic layer was dried over anhydrous  $MgSO_4$ . Solvent was evaporated *in vacuo*. Crude material was purified by column chromatography (10-25% EtOAc in Pet. Ether) yielding the product as a colourless oil (35 mg, 41% yield).

$^1H$  NMR (500 MHz,  $CDCl_3$ )  $\delta$  7.38 – 7.31 (m, 4H), 7.30-7.29 (m, 1H), 3.64 (s, 2H), 2.81 (t, J = 7.0 Hz, 2H), 2.56 – 2.49 (m, 2H), 2.42 (t, J = 7.0 Hz, 2H), 2.20 (s, 2H), 1.54 – 1.47 (m, 2H), 1.41 – 1.31 (m, 2H), 0.92 (t, J = 7.3 Hz, 3H).

$^{13}C$  NMR (126 MHz,  $CDCl_3$ )  $\delta$  139.0, 128.6, 128.3, 127.1, 119.0, 58.4, 53.5, 49.2, 29.3, 20.4, 16.3.

IR (film,  $cm^{-1}$ ): 2956, 2930, 2861, 1809, 1494, 1452, 1370, 1135, 1073, 736, 698.

HRMS: m/z calculated for  $C_{13}H_{19}N_2$   $[M+H]^+$  217.1705; found 217.170.3

## 4. Reaction procedures

### 4.1 General procedure A (amine hydrochloride salts)

An oven dried vial (Biotage Microwave Process Vial (10 mL), equipped with gas-tight pierceable caps) was charged with a stirring bar, the amine hydrochloride salt (0.4 mmol, 1 equiv) and Zn dust (0.8-1.6 mmol, 2-4 equiv). The vial was sealed, evacuated, and backfilled with N<sub>2</sub>. To this was added 1.0 mL dry EtOAc, followed by the aldehyde (0.6-0.8 mmol, 1.5-2.0 equiv) and the alkyl iodide (0.8 –1.6 mmol, 2- 4 equiv). The reaction mixture was stirred for one minute, followed by the addition of TMSOTf (0.2- 0.4 mmol, 0.5-1.0 equiv). The reaction mixture was stirred overnight. The crude mixture was transferred into a 50 mL round bottom flask and diluted with dichloromethane (approximately 20 mL). NaOH (approximately 15 mL, 10% aq.) was added. The heterogenous mixture was vigorously stirred for 10-15 min. The aqueous layer was extracted with dichloromethane three times. The combined organic layer was dried over anhydrous MgSO<sub>4</sub> or Na<sub>2</sub>SO<sub>4</sub>. Solvent was evaporated under reduced pressure. If the product is not pure, column chromatography on silica gel is performed.

### 4.2 General procedure B (free amines)

An oven dried vial (Biotage Microwave Process Vial (10 mL), equipped with gas-tight pierceable caps) was charged with a stirring bar and Zn dust (0.8-1.6 mmol, 2-4 equiv). The vial was sealed, evacuated, and backfilled with N<sub>2</sub>. To this was added dry EtOAc (1 mL), followed by the amine (0.4 mmol, 1.0 equiv), the aldehyde (0.6-0.8 mmol, 1.5-2.0 equiv) and the alkyl iodide (0.8 –1.6 mmol, 2-4 equiv). The reaction mixture was stirred for one minute, followed by the addition of TMSOTf (0.3-0.4 mmol, 1.5- 2.0 equiv). The reaction mixture was stirred overnight. The crude mixture was transferred into a 50 mL round bottom flask and diluted with dichloromethane (approximately 20 mL). NaOH (approximately 15 mL, 10% aq.) was added. The heterogenous mixture was vigorously stirred for 10- 15 min. The aqueous layer was extracted with dichloromethane three times. The combined organic layer was dried over anhydrous MgSO<sub>4</sub> or Na<sub>2</sub>SO<sub>4</sub>. Solvent was evaporated under reduced pressure. If the product is not pure, column chromatography on silica gel is performed.

### 4.2 General procedure C (aldehyde scope)

An oven dried vial (Biotage Microwave Process Vial 10 mL, equipped with gas-tight pierceable caps) was charged with a stirring bar, N-methylbenzylamine hydrochloride (0.2 mmol, 1 equiv) and Zn dust (0.4-0.8 mmol, 2-4 equiv). The vial was sealed, evacuated and backfilled with N<sub>2</sub>. To this was added 1.0 ml dry EtOAc, followed by the aldehyde (0.6-0.8 mmol, 1.5-2.0 equiv) and 2-iodopropane (0.8 –1.6 mmol, 2-4 equiv). The reaction mixture was stirred for one minute, followed by the addition of TBSOTf (0.2 mmol, 1.0 equiv), unless stated. The reaction mixture was stirred overnight. The mixture was diluted with dichloromethane and transferred to a round-bottom flask (Note: If any zinc remained, the mixture was filtered). HCl (3M) in Et<sub>2</sub>O (0.2 mL) was added. Solvent was removed *in vacuo*. The solid that remained was dissolved by a minimum amount of dichloromethane. The mixture was diluted with Pet. Ether (Note: a precipitate was formed upon addition of Pet. Ether). With careful control of pressure, the dichloromethane, not the Pet. Ether, was removed *in vacuo*. After removing the dichloromethane, time was given for the precipitate to settle. The Pet. Ether then was decanted. While stirring, Pet. Ether was added. Time was given for the precipitate to settle. The Pet. Ether was decanted again. The precipitate was dissolved in dichloromethane. NaOH (10%, aq) was added. The aqueous and organic layers were separated. The aqueous layer was extracted twice with dichloromethane. The combined organic layer was dried over Na<sub>2</sub>SO<sub>4</sub> and

filtered. Solvent was removed *in vacuo*. (Note: these steps serve as an alternative to an acid-base wash. However, we occasionally observed some non-basic impurities remained after purification. Therefore, we only adopted this procedure before developing the acid-base wash). If the product is not pure, column chromatography on silica gel is performed.

#### 4.4 Acid-Base wash (ABW) procedure

The mixture was dissolved with a minimum amount of Et<sub>2</sub>O or dichloromethane (Note: the protonated amine product is partly soluble in organic solvents, so only a minimum amount of Et<sub>2</sub>O or dichloromethane is used). The solution was transferred to a separating funnel. HCl (3 M, aq) and Pet. Ether were added (Note: Do not use more polar organic solvent since the protonated amine product is partly soluble in organic solvents). After very vigorous shaking, the aqueous and organic layers were separated. (Note: the protonated amine product might not be completely soluble in water, any gum that appears is the protonated product. This is fine as they stick to the wall of the separating funnel. Don't drain the organic layer too fast as it might wash the gum out). The organic layer was extracted twice with HCl (3M, aq) (Note: the protonated amine product is partly soluble in organic layer, so multiple extractions are needed). The combined aqueous layer was washed with Pet. Ether. It was basified with aq. NaOH (10%, aq) then dichloromethane was added. After very vigorous shaking, the aqueous and organic layer were separated. (Note: Any protonated amine gum on the wall of the separating funnel should dissolve after shaking) The aqueous layer was extracted with dichloromethane twice. The combined organic layer was dried over Na<sub>2</sub>SO<sub>4</sub> or MgSO<sub>4</sub>. Then the solvent was removed *in vacuo*.

#### 4.5 General notes on zinc-mediated carbonyl alkylative amination

- The reaction is air-sensitive, and an atmosphere of nitrogen should be maintained.
- The reaction can be conducted in different reaction flasks (round-bottomed flasks and Schleck tube) although microwave vial or schlenk flasks were used in this investigation.
- Commercial aldehydes are generally not pure and should be distilled prior to use.
- The order of addition of different reagents are important should be followed according to the procedures provided.
- When the reaction is clean and consumes all amine starting material, all non-basic impurities can be removed by performing an acid-base wash (see **general procedure ABW**) to afford the pure product.

## 5. Reaction scope

### 5.1 Amine scope

#### N-Benzyl-N,4-dimethyl-1-phenylpentan-3-amine (4a)

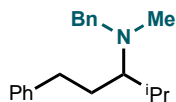

N-Benzyl-N,4-dimethyl-1-phenylpentan-3-amine was prepared according to General Procedure A using Zn (52 mg, 0.8 mmol, 2 equiv), N-methyl-1-phenylmethanamine hydrochloride (63 mg, 0.4 mmol, 1 equiv), hydrocinnamaldehyde (79  $\mu$ L, 0.6 mmol, 1.5 equiv), 2-iodopropane (100  $\mu$ L, 1.2 mmol, 2.5 equiv), and TMSOTf (72  $\mu$ L, 0.4 mmol, 1 equiv) in EtOAc (1 mL). Crude material was purified by column chromatography (0-1% MeOH in dichloromethane (with 5% Et<sub>3</sub>N)) yielding the product as a colourless oil (94 mg, 84%). Data was in line with previous characterisation.<sup>1</sup>

#### N,N,4-trimethyl-1-phenylpentan-3-amine (4d)

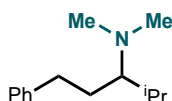

N,N,4-trimethyl-1-phenylpentan-3-amine was prepared according to General Procedure A using Zn (52 mg, 0.8 mmol, 2 equiv), dimethylamine hydrochloride (18 mg, 0.4 mmol, 1 equiv), hydrocinnamaldehyde (79  $\mu$ L, 0.6 mmol, 1.5 equiv), 2-iodopropane (100  $\mu$ L, 1.2 mmol, 2.5 equiv), and TMSOTf (72  $\mu$ L, 0.4 mmol, 1 equiv) in EtOAc (1 mL). Crude material was purified by column chromatography (0-10% MeOH in dichloromethane (with 5% Et<sub>3</sub>N)) yielding the product as a colourless oil (78 mg, 95%).

<sup>1</sup>H NMR (400 MHz, CDCl<sub>3</sub>):  $\delta$  7.32 (t, J = 7.7 Hz, 2H), 7.26 – 7.18 (m, 3H), 2.80 – 2.69 (m, 1H), 2.68 – 2.59 (m, 1H), 2.33 (s, 6H), 2.15 – 2.09 (m, 1H), 1.92 – 1.83 (m, 1H), 1.83 – 1.72 (m, 1H), 1.67 – 1.55 (m, 1H), 0.96 (d, J = 6.7 Hz, 3H), 0.96 (d, J = 6.7 Hz, 3H).

<sup>13</sup>C NMR (101 MHz, CDCl<sub>3</sub>):  $\delta$  143.1, 128.3, 128.2, 125.6, 69.2, 41.3, 35.4, 29.5, 29.1, 21.4, 19.7.

IR (film, cm<sup>-1</sup>): 2953, 2871, 1453, 1367, 1174, 1140, 1088, 736, 697.

HRMS: m/z calcd for C<sub>14</sub>H<sub>23</sub>N [M+H]<sup>+</sup> 206.1904; found 206.1907.

### N,N-Dibenzyl-4-methyl-1-phenylpentan-3-amine (4e)

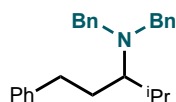

N,N-dibenzyl-4-methyl-1-phenylpentan-3-amine was prepared according to General Procedure **A** using Zn (52 mg, 0.8 mmol, 2 equiv), dibenzylamine hydrochloride (93 mg, 0.4 mmol, 1 equiv), hydrocinnamaldehyde (79  $\mu$ L, 0.6 mmol, 1.5 equiv), 2-iodopropane (100  $\mu$ L, 1.2 mmol, 2.5 equiv), and TMSOTf (108  $\mu$ L, 0.6 mmol, 1.5 equiv) in EtOAc (1 mL). Crude material was purified by column chromatography (50-100% Pet. Ether in dichloromethane (with 5% Et<sub>3</sub>N)) yielding the product as a colourless oil (107 mg, 75%).

**<sup>1</sup>H NMR** (500 MHz, CDCl<sub>3</sub>):  $\delta$  7.41 – 7.36 (m, 4H), 7.36 – 7.29 (m, 6H), 7.28 – 7.20 (m, 3H), 7.19 – 7.15 (m, 2H), 3.72 (d, *J* = 13.7 Hz, 2H), 3.65 (d, *J* = 13.7 Hz, 2H), 2.86 – 2.76 (m, 1H), 2.57 – 2.49 (m, 1H), 2.38 (td, *J* = 6.4, 5.2 Hz, 1H), 2.04 (hept, *J* = 6.7 Hz, 1H), 1.99 – 1.89 (m, 1H), 1.70 – 1.59 (m, 1H), 0.99 (d, *J* = 6.8 Hz, 3H), 0.95 (d, *J* = 6.7 Hz, 3H).

**<sup>13</sup>C NMR** (126 MHz, CDCl<sub>3</sub>):  $\delta$  143.1, 140.6, 129.0, 128.4, 128.3, 128.1, 126.7, 125.6, 62.5, 54.4, 35.0, 29.5, 29.1, 21.7, 20.2.

**IR** (film, cm<sup>-1</sup>): 3025, 2952, 2797, 1493, 1452, 744, 696.

**HRMS**: *m/z* calcd for C<sub>26</sub>H<sub>31</sub>N [M+H]<sup>+</sup> 358.2530; found 358.2532.

### 3-(Benzyl(4-methyl-1-phenylpentan-3-yl)amino)propanenitrile (4f)

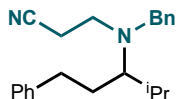

3-(Benzyl(4-methyl-1-phenylpentan-3-yl)amino)propanenitrile was prepared according to General Procedure **B** using Zn (52 mg, 0.8 mmol, 2 equiv), 3-(benzylamino)propanenitrile (65 mg, 0.4 mmol, 1 equiv), hydrocinnamaldehyde (79  $\mu$ L, 0.6 mmol, 1.5 equiv), 2-iodopropane (100  $\mu$ L, 1.2 mmol, 2.5 equiv), and TMSOTf (108  $\mu$ L, 0.6 mmol, 1.5 equiv) in EtOAc (1 mL). Crude material was purified by column chromatography (1% MeOH in dichloromethane (with 5% Et<sub>3</sub>N)) yielding the product as a colourless oil (101 mg, 79%).

**<sup>1</sup>H NMR** (400 MHz, CDCl<sub>3</sub>):  $\delta$  7.47 – 7.33 (m, 7H), 7.31 – 7.20 (m, 3H), 3.82 (d, *J* = 13.8 Hz, 1H), 3.75 (d, *J* = 13.9 Hz, 1H), 3.01 – 2.83 (m, 3H), 2.80 – 2.68 (m, 1H), 2.41 (q, *J* = 6.4 Hz, 1H), 2.23 (t, *J* = 7.0 Hz, 2H), 1.96 (app. oct., *J* = 6.9 Hz, 1H), 1.87 1.90 – 1.81 (m, 2H), 1.10 (d, *J* = 6.7 Hz, 3H), 1.06 (d, *J* = 6.6 Hz, 3H).

**<sup>13</sup>C NMR** (101 MHz, CDCl<sub>3</sub>):  $\delta$  142.6, 140.1, 128.9, 128.52, 128.48, 127.3, 126.0, 119.1, 66.4, 55.5, 48.0, 34.8, 30.80, 30.76, 21.7, 20.6, 18.3.

**IR** (film, cm<sup>-1</sup>): 2954, 2867, 2246, 1494, 1452, 1027, 734, 697.

**HRMS**: *m/z* calcd for C<sub>22</sub>H<sub>28</sub>N<sub>2</sub> [M+H]<sup>+</sup> 321.2326; found 321.2319.

### N-benzyl-N-(3,4-dimethoxyphenethyl)-4-methyl-1-phenylpentan-3-amine (4g)

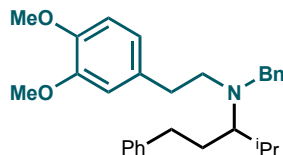

N,N-Dibenzyl-4-methyl-1-phenylpentan-3-amine was prepared according to General Procedure **B** using Zn (52 mg, 0.8 mmol, 2 equiv), *N*-benzyl-2-(3,4-dimethoxyphenyl)ethan-1-amine (108 mg, 0.4 mmol, 1 equiv), hydrocinnamaldehyde (79  $\mu$ L, 0.6 mmol, 1.5 equiv), 2-iodopropane (100  $\mu$ L, 1.2 mmol, 2.5 equiv), and TMSOTf (108  $\mu$ L, 0.6 mmol, 1.5 equiv) in EtOAc (1 mL). Crude material was purified by column chromatography (1% MeOH in dichloromethane (with 5% Et<sub>3</sub>N)) yielding the product as a colourless oil (149 mg, 86%).

**<sup>1</sup>H NMR** (400 MHz, CDCl<sub>3</sub>):  $\delta$  7.46 – 7.14 (m, 10H), 6.81 (d, *J* = 8.1 Hz, 1H), 6.67 (dd, *J* = 8.1, 1.9 Hz, 1H), 6.61 (s, 1H), 3.89 (s, 3H), 3.87 (s, 3H), 3.85 – 3.76 (m, 2H), 2.88 – 2.79 (m, 3H), 2.70 – 2.63 (m, 3H), 2.45 (q, *J* = 6.5 Hz, 1H), 2.01 – 1.82 (m, 2H), 1.82 – 1.71 (m, 1H), 1.05 – 0.99 (m, 6H).

**<sup>13</sup>C NMR** (101 MHz, CDCl<sub>3</sub>):  $\delta$  148.7, 147.1, 143.0, 141.2, 133.4, 128.8, 128.29, 128.27, 128.0, 126.5, 125.6, 120.5, 112.1, 111.2, 65.3, 55.9, 55.7, 55.5, 53.4, 35.8, 35.0, 30.5, 30.4, 21.6, 20.5.

**IR** (film, cm<sup>-1</sup>): 2953, 2833, 1514, 1263, 1234, 1140, 1028, 732, 698.

**HRMS**: *m/z* calcd for C<sub>22</sub>H<sub>32</sub>NO<sub>2</sub> [M+H]<sup>+</sup> 431.2819; found 431.2814.

### 1-(4-Methyl-1-phenylpentan-3-yl)azetidine (4h)

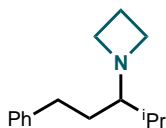

1-(4-Methyl-1-phenylpentan-3-yl)azetidine was prepared according to General Procedure **A** using Zn (52 mg, 0.8 mmol, 2 equiv), azetidine hydrochloride (37 mg, 0.4 mmol, 1 equiv), hydrocinnamaldehyde (79  $\mu$ L, 0.6 mmol, 1.5 equiv), 2-iodopropane (100  $\mu$ L, 1.2 mmol, 2.5 equiv), and TMSOTf (72  $\mu$ L, 0.4 mmol, 1 equiv) in EtOAc (1 mL). Crude material was purified by column chromatography (0-10% MeOH in dichloromethane (with 5% Et<sub>3</sub>N)) yielding the product as a colourless oil (54 mg, 62%).

**<sup>1</sup>H NMR** (400 MHz, CDCl<sub>3</sub>):  $\delta$  7.28 7.31 – 7.25 (m, 2H) 7.22 – 7.13 (m, 3H), 3.27 – 3.13 (m, 4H), 2.71 – 2.57 (m, 2H), 2.08 – 1.95 (m, 3H), 1.88 – 1.74 (m, 1H), 1.69 – 1.50 (m, 2H), 0.91 (d, *J* = 6.8 Hz, 3H), 0.89 (d, *J* = 7.1 Hz, 3H).

**<sup>13</sup>C NMR** (101 MHz, CDCl<sub>3</sub>):  $\delta$  142.8, 128.3, 125.7, 72.2, 54.7, 34.4, 30.1, 28.5, 19.6, 17.42, 17.38.

**IR** (film, cm<sup>-1</sup>): 2954, 2811, 1495, 1453, 1355, 1196, 1056, 747, 697.

**HRMS**: *m/z* calcd for C<sub>15</sub>H<sub>24</sub>N [M+H]<sup>+</sup> 218.1904; found 218.1907.



### 3-Methoxy-1-(4-methyl-1-phenylpentan-3-yl)azetidide (4i)

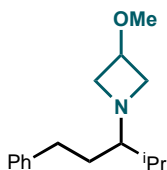

3-Methoxy-1-(4-methyl-1-phenylpentan-3-yl)azetidide was prepared according to General Procedure A using Zn (52 mg, 0.8 mmol, 2 equiv), 3-methoxyazetidide hydrochloride (49 mg, 0.4 mmol, 1 equiv), hydrocinnamaldehyde (79  $\mu$ L, 0.6 mmol, 1.5 equiv), 2-iodopropane (100  $\mu$ L, 1.2 mmol, 2.5 equiv), and TMSOTf (72  $\mu$ L, 0.4 mmol, 1 equiv) in EtOAc (1 mL). Crude material was purified by column chromatography (0-10% MeOH in dichloromethane (with 5% Et<sub>3</sub>N)) yielding the product as a colourless oil (68 mg, 69%).

<sup>1</sup>H NMR (400 MHz, CDCl<sub>3</sub>):  $\delta$  7.30 – 7.25 (m, 2H), 7.21 – 7.15 (m, 3H), 4.00 (quint, J = 5.9 Hz, 1H), 3.73 – 3.54 (m, 2H), 3.25 (s, 3H), 2.90 (t, J = 6.5 Hz, 2H), 2.72 – 2.56 (m, 2H), 2.11 – 2.06 (m, 1H), 1.82 (app. oct., J = 7.0, 2.9 Hz, 1H), 1.72 – 1.51 (m, 2H), 0.92 – 0.87 (m, 6H).

<sup>13</sup>C NMR (101 MHz, CDCl<sub>3</sub>):  $\delta$  142.7, 128.3, 128.2, 125.7, 72.3, 69.5, 60.9, 60.7, 55.9, 34.3, 30.3, 28.8, 19.4, 17.4.

IR (film, cm<sup>-1</sup>): 3035, 2931, 2823, 1495, 1453, 1366, 1221, 1143, 1064, 749, 697.

HRMS: m/z calcd for C<sub>16</sub>H<sub>26</sub>NO [M+H]<sup>+</sup> 248.2009; found 248.2010.

### 2,2-Dimethyl-1-((2S)-1-(4-methyl-1-phenylpentan-3-yl)pyrrolidin-2-yl)propan-1-one (4j)

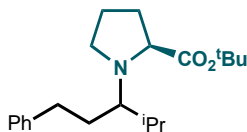

2,2-Dimethyl-1-((2S)-1-(4-methyl-1-phenylpentan-3-yl)pyrrolidin-2-yl)propan-1-one was prepared according to General Procedure A using Zn (52 mg, 0.8 mmol, 2 equiv), (S)-2,2-dimethyl-1-(pyrrolidin-2-yl)propan-1-one hydrochloride (77 mg, 0.4 mmol, 1 equiv), hydrocinnamaldehyde (79  $\mu$ L, 0.6 mmol, 1.5 equiv), 2-iodopropane (100  $\mu$ L, 1.2 mmol, 2.5 equiv), and TMSOTf (72  $\mu$ L, 0.4 mmol, 1 equiv) in EtOAc (1 mL). Crude material was purified by column chromatography (0-1% MeOH in dichloromethane (with 5% Et<sub>3</sub>N)) yielding the product as a colourless oil (68 mg, 54%, 3.6:1 d.r.). Data was in line with previous characterisation.<sup>1</sup>

### (2*R*)-1-(4-Methyl-1-phenylpentan-3-yl)-2-(trifluoromethyl)pyrrolidine (4k)

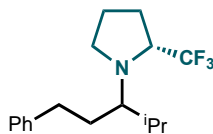

(2*R*)-1-(4-Methyl-1-phenylpentan-3-yl)-2-(trifluoromethyl)pyrrolidine was prepared according to General Procedure **B** using Zn (52 mg, 0.8 mmol, 2 equiv), (*R*)-2-(trifluoromethyl)pyrrolidine (56 mg, 0.4 mmol, 1 equiv), hydrocinnamaldehyde (79  $\mu$ L, 0.6 mmol, 1.5 equiv), 2-iodopropane (100  $\mu$ L, 1.2 mmol, 2.5 equiv), and TMSOTf (108  $\mu$ L, 0.6 mmol, 1.5 equiv) in EtOAc (1 mL). Crude material was purified by column chromatography (0–100% dichloromethane in Pet. Ether (with 5% Et<sub>3</sub>N)) yielding the product as a colourless oil (76 mg, 64%, 13.4:1 d.r.). Data was in line with previous characterisation.<sup>1</sup>

### 4-Bromo-1-(4-methyl-1-phenylpentan-3-yl)piperidine (4l)

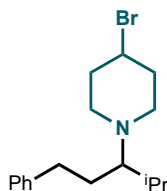

4-Bromo-1-(4-methyl-1-phenylpentan-3-yl)piperidine was prepared according to General Procedure **A** using Zn (52 mg, 0.8 mmol, 2 equiv), 4-bromopiperidine hydrobromide (98 mg, 0.4 mmol, 1 equiv), hydrocinnamaldehyde (79  $\mu$ L, 0.6 mmol, 1.5 equiv), 2-iodopropane (100  $\mu$ L, 1.2 mmol, 2.5 equiv), and TMSOTf (72  $\mu$ L, 0.4 mmol, 1.0 equiv) in EtOAc (1 mL). Crude material was purified by column chromatography (0-1% MeOH in dichloromethane (with 5% Et<sub>3</sub>N)) yielding the product as a colourless oil (92 mg, 71%).

<sup>1</sup>H NMR (400 MHz, CDCl<sub>3</sub>):  $\delta$  7.35 – 7.26 (m, 2H), 7.23 – 7.16 (m, 3H), 4.23 – 4.14 (m, 1H), 2.90 – 2.70 (m, 3H), 2.67 – 2.45 (m, 3H), 2.19 – 2.09 (m, 3H), 2.08 – 1.94 (m, 2H), 1.85 – 1.69 (m, 2H), 1.69 – 1.57 (m, 1H), 0.91 (d, *J* = 6.7 Hz, 6H).

<sup>13</sup>C NMR (101 MHz, CDCl<sub>3</sub>):  $\delta$  142.9, 128.33, 128.26, 125.6, 69.5, 51.6, 48.5, 37.53, 37.47, 34.7, 29.9, 29.8, 21.5, 20.3.

IR (film, cm<sup>-1</sup>): 2950, 1452, 1145, 1104, 1007, 748, 697.

HRMS: *m/z* calcd for C<sub>17</sub>H<sub>27</sub>BrN [M+H]<sup>+</sup> 324.1322; found 324.1320.

#### 4-(4-Chlorophenyl)-1-(4-methyl-1-phenylpentan-3-yl)piperidin-4-ol (4m)

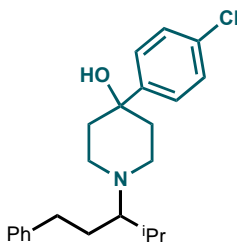

4-(4-Chlorophenyl)-1-(4-methyl-1-phenylpentan-3-yl)piperidin-4-ol was prepared according to General Procedure **B** using Zn (52 mg, 0.8 mmol, 2 equiv), 4-(4-chlorophenyl)piperidin-4-ol (84 mg, 0.4 mmol, 1 equiv), hydrocinnamaldehyde (79  $\mu$ L, 0.6 mmol, 1.5 equiv), 2-iodopropane (100  $\mu$ L, 1.2 mmol, 2.5 equiv), and TMSOTf (108  $\mu$ L, 0.4 mmol, 1.5 equiv) in EtOAc (1 mL). Crude material was purified by column chromatography (0-2% MeOH in dichloromethane (with 5% Et<sub>3</sub>N)) yielding the product as a colourless oil (114 mg, 77%).

**<sup>1</sup>H NMR** (400 MHz, CDCl<sub>3</sub>):  $\delta$  7.49 (d, J = 8.2 Hz, 2H), 7.39 – 7.30 (m, 4H), 7.29 – 7.21 (m, 3H), 2.99 – 2.79 (m, 3H), 2.77 – 2.62 (m, 3H), 2.30 – 2.21 (m, 1H), 2.07 (qd, J = 12.9, 4.6 Hz, 2H), 1.99 – 1.78 (m, 3H), 1.77 – 1.65 (m, 3H), 0.95 (d, J = 6.8 Hz, 3H), 0.94 (d, J = 7.0 Hz, 3H).

**<sup>13</sup>C NMR** (101 MHz, CDCl<sub>3</sub>):  $\delta$  147.3, 143.0, 132.5, 128.3, 128.2, 126.1, 125.6, 71.7, 69.5, 45.3, 45.1, 39.4, 39.2, 34.9, 29.61, 29.57, 21.6, 20.2.

**IR** (film, cm<sup>-1</sup>): 2951, 2821, 1264, 1093, 826, 734, 699.

**HRMS**: m/z calcd for C<sub>23</sub>H<sub>31</sub>ClNO [M+H]<sup>+</sup> 372.2089; found 372.2084.

#### 4-(4-methyl-1-phenylpentan-3-yl)morpholine (4n)

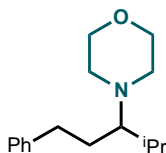

4-(4-methyl-1-phenylpentan-3-yl)morpholine was synthesized according to General Procedure A using Zn (52 mg, 0.8 mmol, 2 equiv), morpholine hydrochloride (49 mg, 0.4 mmol, 1 equiv), hydrocinnamaldehyde (78 mL, 0.6 mmol, 1.5 equiv), 2-iodopropane (100 mL, 1 mmol, 2.5 equiv) and TMSOTf (144 mL, 0.8 mmol, 2 equiv) in EtOAc (1 mL). The crude material was subjected to an acid-base workup according to General Procedure F, followed by column chromatography (10-20% Et<sub>2</sub>O in Pet. Ether) yielding the product as a colourless oil (45 mg, 46%).

Note: The use of morpholine, instead of the hydrochloride salt, gives a significantly lower yield.

<sup>1</sup>H NMR (400 MHz, CDCl<sub>3</sub>): δ 7.32 – 7.24 (m, 2H), 7.23 – 7.16 (m, 3H), 3.68 (t, J = 4.7 Hz, 4H), 2.82 – 2.73 (m, 1H), 2.69 – 2.55 (m, 5H), 2.15 – 2.06 (m, 1H), 1.92 – 1.73 (m, 2H), 1.69 – 1.58 (m, 1H), 0.93 (d, J = 6.6 Hz, 3H), 0.92 (d, J = 6.5 Hz, 3H).

<sup>13</sup>C NMR (101 MHz, CDCl<sub>3</sub>): δ 142.9, 128.4, 128.3, 125.7, 69.5, 67.8, 49.9, 34.8, 29.4, 29.3, 21.4, 19.9.

IR (film, cm<sup>-1</sup>): 2952, 2807, 1452, 1115, 1015, 858, 749, 698.

HRMS: m/z calcd for C<sub>16</sub>H<sub>26</sub>NO [M+H]<sup>+</sup> 248.2009; found 248.2008.

#### Benzyl 4-(4-methyl-1-phenylpentan-3-yl)piperazine-1-carboxylate (4o)

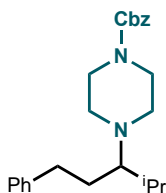

Benzyl 4-(4-methyl-1-phenylpentan-3-yl)piperazine-1-carboxylate was prepared according to General Procedure A using Zn (52 mg, 0.8 mmol, 2 equiv), benzyl piperazine-1-carboxylate hydrochloride (103 mg, 0.4 mmol, 1 equiv), hydrocinnamaldehyde (79 μL, 0.6 mmol, 1.5 equiv), 2-iodopropane (100 μL, 1.2 mmol, 2.5 equiv), and TMSOTf (72 μL, 0.4 mmol, 1 equiv) in EtOAc (1 mL). Crude material was purified by column chromatography (0-2% MeOH in dichloromethane (with 5% Et<sub>3</sub>N)) yielding the product as a colourless oil (126 mg, 83%).

<sup>1</sup>H NMR (400 MHz, CDCl<sub>3</sub>): δ 7.44 – 7.28 (m, 7H), 7.25 – 7.19 (m, 3H), 5.19 (s, 2H), 3.51 (t, J = 5.0 Hz, 4H), 2.82 – 2.73 (m, 1H), 2.71 – 2.52 (m, 5H), 2.20 (td, J = 7.5, 4.8 Hz, 1H), 1.90 – 1.73 (m, 2H), 1.72 – 1.61 (m, 1H), 0.95 (d, J = 6.9 Hz, 6H).

<sup>13</sup>C NMR (101 MHz, CDCl<sub>3</sub>): δ 155.2, 142.6, 136.8, 128.3, 128.23, 128.18, 127.8, 127.7, 125.6, 69.3, 66.9, 49.0, 44.6, 34.5, 29.5, 29.3, 21.3, 20.0.

IR (film, cm<sup>-1</sup>): 2951, 2809, 1697, 1427, 1238, 1119, 1013, 733, 696.

HRMS: m/z calcd for C<sub>24</sub>H<sub>33</sub>N<sub>2</sub>O<sub>2</sub> [M+H]<sup>+</sup> 381.2537; found 381.2532.

#### 4-(4-Methyl-1-phenylpentan-3-yl)thiomorpholine 1,1-dioxide (4p)

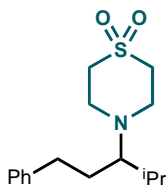

4-(4-Methyl-1-phenylpentan-3-yl)thiomorpholine 1,1-dioxide was prepared according to General Procedure A using Zn (52 mg, 0.8 mmol, 2 equiv), thiomorpholine 1,1-dioxide hydrochloride (69 mg, 0.4 mmol, 1 equiv), hydrocinnamaldehyde (79  $\mu$ L, 0.6 mmol, 1.5 equiv), 2-iodopropane (100  $\mu$ L, 1.2 mmol, 2.5 equiv), and TMSOTf (72  $\mu$ L, 0.4 mmol, 1 equiv) in EtOAc (1 mL). Crude material was purified by column chromatography (0-2% MeOH in dichloromethane (with 5% Et<sub>3</sub>N)) yielding the product as a colourless oil (80 mg, 68%).

**<sup>1</sup>H NMR** (400 MHz, CDCl<sub>3</sub>):  $\delta$  7.35 – 7.27 (m, 2H), 7.24 – 7.16 (m, 3H), 3.18 – 3.06 (m, 4H), 3.05 – 2.92 (m, 4H), 2.79 – 2.60 (m, 2H), 2.29 (td, J = 7.7, 4.7 Hz, 1H), 1.84 – 1.68 (m, 3H), 0.94 (d, J = 6.8 Hz, 6H).

**<sup>13</sup>C NMR** (101 MHz, CDCl<sub>3</sub>):  $\delta$  142.1, 128.5, 128.3, 126.0, 70.6, 52.9, 47.5, 34.4, 30.8, 30.4, 21.5, 20.4.

**IR** (film, cm<sup>-1</sup>): 2954, 2830, 1300, 1268, 1122, 1035, 860, 733, 699.

**HRMS**: m/z calcd for C<sub>16</sub>H<sub>26</sub>NO<sub>2</sub>S [M+H]<sup>+</sup> 296.1679; found 296.1683.

#### 1-(4-Methyl-1-phenylpentan-3-yl)-1,4-diazepan-5-one (4q)

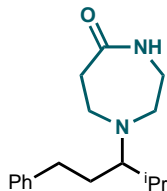

1-(4-Methyl-1-phenylpentan-3-yl)-1,4-diazepan-5-one was prepared according to General Procedure A using Zn (52 mg, 0.8 mmol, 2 equiv), 1,4-diazepan-5-one hydrochloride (60 mg, 0.4 mmol, 1 equiv), hydrocinnamaldehyde (79  $\mu$ L, 0.6 mmol, 1.5 equiv), 2-iodopropane (100  $\mu$ L, 1.2 mmol, 2.5 equiv), and TMSOTf (72  $\mu$ L, 0.4 mmol, 1 equiv) in EtOAc (1 mL). Crude material was purified by column chromatography (0-2% MeOH in dichloromethane (with 5% Et<sub>3</sub>N)) yielding the product as a colourless oil (72 mg, 66%).

**<sup>1</sup>H NMR** (400 MHz, CDCl<sub>3</sub>):  $\delta$  7.34 – 7.26 (m, 2H), 7.24 – 7.14 (m, 3H), 6.81 (s, 1H), 3.31 – 3.19 (m, 1H), 2.87 – 2.70 (m, 5H), 2.67 – 2.55 (m, 3H), 2.29 – 2.07 (m, 1H), 1.84 – 1.61 (m, 3H), 0.93 (d, J = 6.8 Hz, 3H), 0.91 (d, J = 6.8 Hz, 3H).

**<sup>13</sup>C NMR** (101 MHz, CDCl<sub>3</sub>):  $\delta$  178.6, 142.6, 128.3, 128.2, 125.7, 71.8, 54.0, 47.8, 44.5, 40.2, 34.4, 30.52, 30.47, 21.6, 20.4.

**IR** (film, cm<sup>-1</sup>): 3227, 2952, 2808, 1662, 1354, 732, 697.

**HRMS**: m/z calcd for C<sub>17</sub>H<sub>27</sub>N<sub>2</sub>O [M+H]<sup>+</sup> 275.2118; found 275.2114.

### 3-(4-Methyl-1-phenylpentan-3-yl)-3-azabicyclo[3.1.0]hexane (4r)

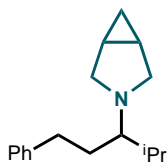

3-(4-Methyl-1-phenylpentan-3-yl)-3-azabicyclo[3.1.0]hexane was prepared according to General Procedure A using Zn (52 mg, 0.8 mmol, 2 equiv), 3-azabicyclo[3.1.0]hexane hydrochloride (48 mg, 0.4 mmol, 1 equiv), hydrocinnamaldehyde (79  $\mu$ L, 0.6 mmol, 1.5 equiv), 2-iodopropane (100  $\mu$ L, 1.2 mmol, 2.5 equiv), and TMSOTf (72  $\mu$ L, 0.4 mmol, 1 equiv) in EtOAc (1 mL). Crude material was purified by column chromatography (0-2% MeOH in dichloromethane (with 5% Et<sub>3</sub>N)) yielding the product as a colourless oil (63 mg, 65%). Data was in line with previous characterisation.<sup>1</sup>

### 2-(4-Methyl-1-phenylpentan-3-yl)octahydrocyclopenta[c]pyrrole (4s)

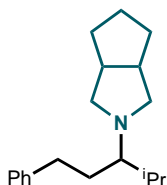

2-(4-Methyl-1-phenylpentan-3-yl)octahydrocyclopenta[c]pyrrole was prepared according to General Procedure A using Zn (52 mg, 0.8 mmol, 2 equiv), octahydrocyclopenta[c]pyrrole hydrochloride (60 mg, 0.4 mmol, 1 equiv), hydrocinnamaldehyde (79  $\mu$ L, 0.6 mmol, 1.5 equiv), 2-iodopropane (100  $\mu$ L, 1.2 mmol, 2.5 equiv), and TMSOTf (72  $\mu$ L, 0.4 mmol, 1 equiv) in EtOAc (1 mL). Crude material was purified by column chromatography (0-3% MeOH in dichloromethane (with 5% Et<sub>3</sub>N)) yielding the product as a colourless oil (89 mg, 82%).

**<sup>1</sup>H NMR** (400 MHz, CDCl<sub>3</sub>):  $\delta$  7.32 – 7.26 (m, 2H), 7.23 – 7.16 (m, 3H), 2.81 (q, J = 8.8 Hz, 2H), 2.77 – 2.68 (m, 1H), 2.67 – 2.58 (m, 1H), 2.58 – 2.47 (m, 2H), 2.22 (dd, J = 8.8, 3.5 Hz, 2H), 2.05 (q, J = 4.8 Hz, 1H), 1.97 – 1.84 (m, 1H), 1.75 – 1.62 (m, 5H), 1.52 – 1.37 (m, 3H), 0.92 (d, J = 6.9 Hz, 3H), 0.91 (d, J = 7.0 Hz, 3H).

**<sup>13</sup>C NMR** (101 MHz, CDCl<sub>3</sub>):  $\delta$  143.1, 128.3, 128.2, 125.6, 67.0, 58.8, 58.2, 41.9, 41.8, 35.4, 33.5, 33.4, 30.4, 30.2, 26.3, 20.4, 17.7.

**IR** (film, cm<sup>-1</sup>): 2954, 2867, 1452, 1265, 1030, 730, 698.

**HRMS**: m/z calcd for C<sub>19</sub>H<sub>30</sub>N [M+H]<sup>+</sup> 272.2373; found 272.2372.

### 6-(4-Methyl-1-phenylpentan-3-yl)-4,5,6,7-tetrahydrothieno[2,3-c]pyridine (4t)

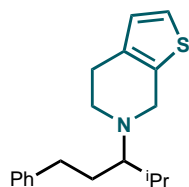

6-(4-Methyl-1-phenylpentan-3-yl)-4,5,6,7-tetrahydrothieno[2,3-c]pyridine was prepared according to General Procedure A using Zn (52 mg, 0.8 mmol, 2 equiv), 4,5,6,7-tetrahydrothieno[2,3-c]pyridine hydrochloride (70 mg, 0.4 mmol, 1 equiv), hydrocinnamaldehyde (79  $\mu$ L, 0.6 mmol, 1.5 equiv), 2-iodopropane (100  $\mu$ L, 1.2 mmol, 2.5 equiv), and TMSOTf (108  $\mu$ L, 0.6 mmol, 1.5 equiv) in EtOAc (1 mL). Crude material was purified by column chromatography (0–50% dichloromethane in Pet. Ether (with 5% Et<sub>3</sub>N)) yielding the product as a colourless oil (98 mg, 82%).

**<sup>1</sup>H NMR** (400 MHz, CDCl<sub>3</sub>):  $\delta$  7.34 – 7.28 (m, 2H), 7.24 – 7.18 (m, 3H), 7.09 (d, J = 5.1 Hz, 1H), 6.77 (d, J = 5.1 Hz, 1H), 3.82 – 3.70 (m, 2H), 2.97 (t, J = 5.4 Hz, 2H), 2.89 – 2.76 (m, 3H), 2.72 – 2.64 (m, 1H), 2.39 (td, J = 7.3, 4.5 Hz, 1H), 2.03 – 1.82 (m, 2H), 1.83 – 1.67 (m, 1H), 0.99 (d, J = 6.7 Hz, 6H).

**<sup>13</sup>C NMR** (101 MHz, CDCl<sub>3</sub>):  $\delta$  143.0, 135.0, 133.9, 128.4, 128.3, 125.6, 125.3, 122.1, 69.0, 49.2, 46.9, 34.8, 30.2, 30.1, 26.8, 21.5, 20.3.

**IR** (film, cm<sup>-1</sup>): 2961, 2873, 1621, 1583, 1453, 1342, 1068, 732, 698, 594.

**HRMS**: m/z calcd for C<sub>19</sub>H<sub>26</sub>NS [M+H]<sup>+</sup> 300.1781; found 300.1776.

### 8-(4-Methyl-1-phenylpentan-3-yl)-8-azabicyclo[3.2.1]octan-3-one (4u)

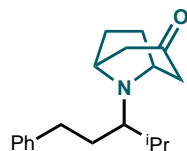

8-(4-Methyl-1-phenylpentan-3-yl)-8-azabicyclo[3.2.1]octan-3-one was prepared according to General Procedure A using Zn (52 mg, 0.8 mmol, 2 equiv), 8-azabicyclo[3.2.1]octan-3-one hydrochloride (65 mg, 0.4 mmol, 1 equiv), hydrocinnamaldehyde (79  $\mu$ L, 0.6 mmol, 1.5 equiv), 2-iodopropane (100  $\mu$ L, 1.2 mmol, 2.5 equiv), and TMSOTf (72  $\mu$ L, 0.4 mmol, 1 equiv) in EtOAc (1 mL). Crude material was purified by column chromatography (0-10% MeOH in dichloromethane (with 5% Et<sub>3</sub>N)) yielding the product as a colourless oil (72 mg, 63%).

<sup>1</sup>H NMR (400 MHz, CDCl<sub>3</sub>):  $\delta$  7.33 – 7.25 (m, 2H), 7.23 – 7.15 (m, 3H), 3.75 – 3.67 (m, 2H), 2.71 (t, J = 8.4 Hz, 2H), 2.64 – 2.53 (m, 3H), 2.14 (t, J = 16.3 Hz, 2H), 2.08 – 1.80 (m, 4H), 1.78 – 1.68 (m, 1H), 1.66 – 1.52 (m, 2H), 1.01 – 0.94 (m, 6H).

<sup>13</sup>C NMR (101 MHz, CDCl<sub>3</sub>):  $\delta$  210.7, 142.4, 128.4, 128.2, 125.9, 60.3, 56.9, 55.4, 46.7, 46.5, 35.1, 31.2, 30.1, 28.9, 28.8, 19.6, 16.6.

IR (film, cm<sup>-1</sup>): 2954, 1711, 1452, 1346, 1192, 1073, 910, 750, 698.

HRMS: m/z calcd for C<sub>19</sub>H<sub>28</sub>NO [M+H]<sup>+</sup> 286.2166; found 286.2168.

### 3-(4-Methyl-1-phenylpentan-3-yl)-8-oxa-3-azabicyclo[3.2.1]octane (4v)

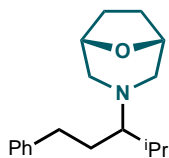

3-(4-Methyl-1-phenylpentan-3-yl)-8-oxa-3-azabicyclo[3.2.1]octane was prepared according to General Procedure A using Zn (52 mg, 0.8 mmol, 2 equiv), 8-oxa-3-azabicyclo[3.2.1]octane hydrochloride (60 mg, 0.4 mmol, 1 equiv), hydrocinnamaldehyde (79  $\mu$ L, 0.6 mmol, 1.5 equiv), 2-iodopropane (100  $\mu$ L, 1.2 mmol, 2.5 equiv), and TMSOTf (72  $\mu$ L, 0.4 mmol, 1.0 equiv) in EtOAc (1 mL). Crude material was purified by column chromatography (0-2% MeOH in dichloromethane (with 5% Et<sub>3</sub>N)) yielding the product as a colourless oil (85 mg, 78%).

<sup>1</sup>H NMR (400 MHz, CDCl<sub>3</sub>):  $\delta$  7.34 – 7.28 (m, 2H), 7.25 – 7.18 (m, 3H), 4.33 – 4.26 (m, 2H), 2.88 (t, J = 10.1 Hz, 2H), 2.80 (td, J = 10.6, 9.7, 5.2 Hz, 1H), 2.71 – 2.57 (m, 1H), 2.42 (t, J = 11.5 Hz, 2H), 2.07 – 1.95 (m, 3H), 1.93 – 1.71 (m, 4H), 1.68 – 1.58 (m, 1H), 0.96 (d, J = 6.8 Hz, 3H), 0.93 (d, J = 6.7 Hz, 3H).

<sup>13</sup>C NMR (101 MHz, CDCl<sub>3</sub>):  $\delta$  142.9, 128.3, 128.3, 125.7, 75.3, 75.2, 68.4, 54.9, 54.4, 34.8, 29.73, 29.69, 28.52, 28.47, 21.3, 20.2.

IR (film, cm<sup>-1</sup>): 2947, 2868, 2807, 1453, 1066, 993, 873, 749, 697.

HRMS: m/z calcd for C<sub>18</sub>H<sub>28</sub>NO [M+H]<sup>+</sup> 274.2166; found 274.2164.



### 8-(4-Methyl-1-phenylpentan-3-yl)-1-phenyl-1,3,8-triazaspiro[4.5]decan-4-one (4w)

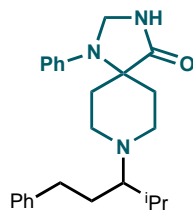

8-(4-Methyl-1-phenylpentan-3-yl)-1-phenyl-1,3,8-triazaspiro[4.5]decan-4-one was prepared according to General Procedure **B** using Zn (52 mg, 0.8 mmol, 2 equiv), 8-azabicyclo[3.2.1]octan-3-ol (93 mg, 0.4 mmol, 1 equiv), hydrocinnamaldehyde (79  $\mu$ L, 0.6 mmol, 1.5 equiv), 2-iodopropane (100  $\mu$ L, 1.2 mmol, 2.5 equiv), and TMSOTf (108  $\mu$ L, 0.6 mmol, 1.5 equiv) in EtOAc (1 mL). Crude material was purified by column chromatography (0-2% MeOH in dichloromethane (with 5% Et<sub>3</sub>N)) yielding the product as a white solid (128 mg, 82%).

**<sup>1</sup>H NMR** (400 MHz, CDCl<sub>3</sub>):  $\delta$  8.02 (s, 1H), 7.38 – 7.20 (m, 7H), 7.01 (d, *J* = 8.2 Hz, 2H), 6.87 (t, *J* = 7.3 Hz, 1H), 4.80 (s, 2H), 3.26 (tt, *J* = 9.4, 5.3 Hz, 2H), 3.01 – 2.67 (m, 6H), 2.31 (td, *J* = 7.6, 4.4 Hz, 1H), 2.00 – 1.82 (m, 2H), 1.81 – 1.67 (m, 3H), 1.04 (d, *J* = 6.8 Hz, 3H), 1.00 (d, *J* = 6.6 Hz, 3H).

**<sup>13</sup>C NMR** (101 MHz, CDCl<sub>3</sub>):  $\delta$  179.1, 143.21, 143.17, 129.1, 128.4, 128.3, 125.6, 118.0, 114.2, 69.6, 59.7, 59.4, 46.11, 46.06, 34.8, 29.80, 29.76, 29.6, 21.6, 20.3.

**IR** (film, cm<sup>-1</sup>): 3204, 3025, 2951, 2862, 1704, 1599, 1501, 1368, 1263, 736, 696.

**HRMS**: *m/z* calcd for C<sub>25</sub>H<sub>34</sub>N<sub>3</sub>O [M+H]<sup>+</sup> 392.2697; found 392.2694.

### N,4-dimethyl-1-phenylpentan-3-amine (6a)

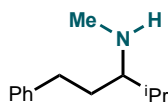

N,4-dimethyl-1-phenylpentan-3-amine was synthesized according to General Procedure **A** using Zn (52 mg, 0.8 mmol, 2 equiv), methylamine hydrochloride (27 mg, 0.4 mmol, 1 equiv), hydrocinnamaldehyde (79  $\mu$ L, 0.6 mmol, 1.5 equiv), 2-iodopropane (100  $\mu$ L, 1 mmol, 2.5 equiv) and TMSOTf (72  $\mu$ L, 0.4 mmol, 1 equiv) in EtOAc (1 mL). Crude material was purified by column chromatography (2-6% MeOH in dichloromethane (with 5% Et<sub>3</sub>N)) yielding the product as a colourless oil (62 mg, 81%).

**<sup>1</sup>H NMR** (400 MHz, CDCl<sub>3</sub>)  $\delta$  7.35 – 7.27 (m, 2H), 7.26 – 7.18 (m, 3H), 2.80 – 2.69 (m, 1H), 2.69 – 2.60 (m, 1H), 2.44 (s, 3H), 2.32 – 2.22 (m, 1H), 1.96 – 1.85 (m, 1H), 1.81 – 1.70 (m, 1H), 1.69 – 1.57 (m, 1H), 1.36 (brs, 1H), 0.99 – 0.88 (m, 6H).

**<sup>13</sup>C NMR** (101 MHz, CDCl<sub>3</sub>)  $\delta$  142.7, 128.27, 128.28, 125.6, 64.6, 34.4, 32.9, 32.1, 29.4, 18.6, 18.0.

**IR** (film, cm<sup>-1</sup>): 2953, 2869, 2789, 1453, 747, 697.

**HRMS**: *m/z* calcd for C<sub>13</sub>H<sub>22</sub>N [M+H]<sup>+</sup> 192.1747; found 192.1744.

### N-Benzyl-4-methyl-1-phenylpentan-3-amine (6b)

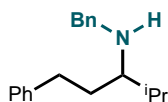

N-Benzyl-4-methyl-1-phenylpentan-3-amine was prepared according to General Procedure **B** using Zn (52 mg, 0.8 mmol, 2 equiv), benzylamine (44  $\mu$ L, 0.4 mmol, 1 equiv), hydrocinnamaldehyde (79  $\mu$ L, 0.6 mmol, 1.5 equiv), 2-iodopropane (100  $\mu$ L, 1.2 mmol, 2.5 equiv), and TMSOTf (108  $\mu$ L, 0.6 mmol, 1.5 equiv) in EtOAc (1 mL). Crude material was purified by column chromatography (0-5% MeOH in dichloromethane (with 5% Et<sub>3</sub>N)) yielding the product as a colourless oil (58 mg, 54%). 56% assay yield by crude <sup>1</sup>H NMR analysis using 1,1,2,2-tetrachloroethane.

Note: Compound is at highest achievable purity, further attempts at purification or use of acidic purification methods leads to degradation.

<sup>1</sup>H NMR (400 MHz, CDCl<sub>3</sub>):  $\delta$  7.43 – 7.37 (m, 3H), 7.37 – 7.30 (m, 4H), 7.27 – 7.21 (m, 3H), 3.84 (s, 2H), 2.87 – 2.76 (m, 1H), 2.74 – 2.64 (m, 1H), 2.50 – 2.43 (m, 1H), 2.05 – 1.91 (m, 1H), 1.90 – 1.77 (m, 1H), 1.77 – 1.63 (m, 1H), 1.39 (bs, 1H), 0.98 (d, J = 6.9 Hz, 6H).

<sup>13</sup>C NMR (101 MHz, CDCl<sub>3</sub>):  $\delta$  142.8, 141.2, 128.34, 128.27, 128.2, 126.8, 125.6, 61.9, 51.8, 32.8, 32.5, 29.8, 18.7, 18.0.

IR (film, cm<sup>-1</sup>): 3025, 2953, 2868, 1494, 1452, 741, 695.

HRMS: m/z calcd for C<sub>19</sub>H<sub>26</sub>N [M+H]<sup>+</sup> 268.2060; found 268.2057.

### N-(but-3-en-1-yl)-4-methyl-1-phenylpentan-3-amine (6c)

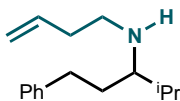

N-(but-3-en-1-yl)-4-methyl-1-phenylpentan-3-amine was prepared according to General Procedure **A** using Zn (52 mg, 0.8 mmol, 2 equiv), but-3-en-1-amine hydrochloride (43 mg, 0.4 mmol, 1 equiv), hydrocinnamaldehyde (79  $\mu$ L, 0.6 mmol, 1.5 equiv), 2-iodopropane (100  $\mu$ L, 1.2 mmol, 2.5 equiv), and TMSOTf (72  $\mu$ L, 0.4 mmol, 1 equiv) in EtOAc (1 mL). Crude material was purified by column chromatography (0-2% MeOH in dichloromethane (with 5% Et<sub>3</sub>N)) yielding the product as a colourless oil (40 mg, 44%).

<sup>1</sup>H NMR (400 MHz, CDCl<sub>3</sub>):  $\delta$  7.33 – 7.25 (m, 2H), 7.23 – 7.15 (m, 3H), 5.82 (ddt, J = 17.0, 10.3, 6.8 Hz, 1H), 5.11 (dt, J = 17.1, 1.7 Hz, 1H), 5.06 (d, J = 10.2 Hz, 1H), 2.79 – 2.55 (m, 4H), 2.34 – 2.29 (m, 1H), 2.25 (q, J = 6.8 Hz, 2H), 1.84 (dq, J = 13.3, 6.7 Hz, 1H), 1.80 – 1.69 (m, 1H), 1.66 – 1.54 (m, 1H), 1.21 (bs, 1H), 0.90 (d, J = 6.8 Hz, 3H), 0.90 (d, J = 6.8 Hz, 3H).

<sup>13</sup>C NMR (101 MHz, CDCl<sub>3</sub>):  $\delta$  142.8, 136.8, 128.31, 128.27, 125.6, 116.1, 62.7, 46.8, 34.7, 32.9, 32.6, 30.0, 18.7, 18.2.

IR (film, cm<sup>-1</sup>): 2954, 2927, 1639, 1453, 911, 746, 697.

HRMS: m/z calcd for C<sub>16</sub>H<sub>26</sub>N [M+H]<sup>+</sup> 232.2060; found 232.2062.

### N-(2-Methoxyethyl)-4-methyl-1-phenylpentan-3-amine (6d)

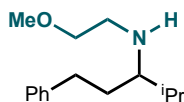

N-(2-Methoxyethyl)-4-methyl-1-phenylpentan-3-amine was prepared according to General Procedure **B** using Zn (52 mg, 0.8 mmol, 2 equiv), 2-methoxyethan-1-amine (35  $\mu$ L, 0.4 mmol, 1 equiv), hydrocinnamaldehyde (79  $\mu$ L, 0.6 mmol, 1.5 equiv), 2-iodopropane (100  $\mu$ L, 1.2 mmol, 2.5 equiv), and TMSOTf (108  $\mu$ L, 0.6 mmol, 1.5 equiv) in EtOAc (1 mL). Crude material was purified by column chromatography (0-2% MeOH in dichloromethane (with 5% Et<sub>3</sub>N)) yielding the product as a colourless oil (62 mg, 66%).

<sup>1</sup>H NMR (400 MHz, CDCl<sub>3</sub>):  $\delta$  7.35 – 7.27 (m, 2H), 7.26 – 7.17 (m, 3H), 3.52 (t, J = 5.3 Hz, 2H), 3.40 (s, 3H), 2.84 – 2.72 (m, 3H), 2.71 – 2.58 (m, 1H), 2.39 – 2.19 (m, 1H), 1.92 – 1.71 (m, 2H), 1.70 – 1.47 (m, 2H), 0.94 (d, J = 6.8 Hz, 3H), 0.93 (d, J = 6.8 Hz, 3H).

<sup>13</sup>C NMR (101 MHz, CDCl<sub>3</sub>):  $\delta$  142.8, 128.32, 128.25, 125.6, 72.4, 62.7, 58.7, 47.2, 32.8, 32.7, 30.1, 18.7, 18.1.

IR (film, cm<sup>-1</sup>): 2953, 2871, 1495, 1453, 1115, 1029, 748, 697.

HRMS: m/z calcd for C<sub>15</sub>H<sub>26</sub>NO [M+H]<sup>+</sup> 236.2009; found 236.2005.

### N-(2,2-Difluoroethyl)-4-methyl-1-phenylpentan-3-amine (6e)

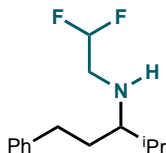

N-(2,2-Difluoroethyl)-4-methyl-1-phenylpentan-3-amine was prepared according to General Procedure **B** using Zn (52 mg, 0.8 mmol, 2 equiv), 2,2-difluoroethan-1-amine (28  $\mu$ L, 0.4 mmol, 1 equiv), hydrocinnamaldehyde (79  $\mu$ L, 0.6 mmol, 1.5 equiv), 2-iodopropane (100  $\mu$ L, 1.2 mmol, 2.5 equiv), and TMSOTf (108  $\mu$ L, 0.6 mmol, 1.5 equiv) in EtOAc (1 mL). Crude material was purified by column chromatography (50-100% Pet. Ether in dichloromethane (with 5% Et<sub>3</sub>N)) yielding the product as a colourless oil (51 mg, 53%).

<sup>1</sup>H NMR (400 MHz, CDCl<sub>3</sub>):  $\delta$  7.34 – 7.27 (m, 2H), 7.24 – 7.18 (m, 3H), 5.80 (tt, J = 56.8, 4.5 Hz, 1H), 2.96 (tt, J = 14.8, 4.8 Hz, 2H), 2.83 – 2.71 (m, 1H), 2.68 – 2.58 (m, 1H), 2.35 (dt, J = 8.6, 4.5 Hz, 1H), 1.87 – 1.69 (m, 2H), 1.63 – 1.51 (m, 1H), 1.37 – 1.17 (m, 1H), 0.91 (d, J = 7.0 Hz, 6H).

<sup>13</sup>C NMR (101 MHz, CDCl<sub>3</sub>):  $\delta$  142.4, 128.4, 128.3, 125.8, 116.40 (t, J = 240.2 Hz), 62.6, 49.73 (t, J = 24.7 Hz), 32.7, 32.6, 30.2, 18.5, 17.9.

<sup>19</sup>F NMR (376 MHz, CDCl<sub>3</sub>):  $\delta$  -122.80.

IR (film, cm<sup>-1</sup>): 2957, 2871, 1453, 1111, 1051, 739, 698.

HRMS: m/z calcd for C<sub>14</sub>H<sub>22</sub>F<sub>2</sub>N [M+H]<sup>+</sup> 242.1715; found 242.1717.

#### 4-Methyl-1-phenyl-*N*-(2-(pyridin-4-yl)ethyl)pentan-3-amine (6f)

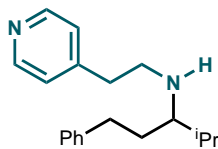

4-Methyl-1-phenyl-*N*-(2-(pyridin-4-yl)ethyl)pentan-3-amine was prepared according to General Procedure **B** using Zn (52 mg, 0.8 mmol, 2 equiv), 4-(2-Aminoethyl)pyridine (47  $\mu$ L, 0.4 mmol, 1 equiv), hydrocinnamaldehyde (79  $\mu$ L, 0.6 mmol, 1.5 equiv), 2-iodopropane (100  $\mu$ L, 1.2 mmol, 2.5 equiv), and TMSOTf (144  $\mu$ L, 0.8 mmol, 2 equiv) in EtOAc (1 mL). Crude material was purified by column chromatography (0-2% MeOH in dichloromethane (with 5% Et<sub>3</sub>N)) yielding the product as a pale-yellow oil (86 mg, 76%).

<sup>1</sup>H NMR (400 MHz, CDCl<sub>3</sub>):  $\delta$  8.48 (dd, *J* = 11.7, 3.5 Hz, 2H), 7.55 (dd, *J* = 7.9, 1.8 Hz, 1H), 7.32 – 7.10 (m, 6H), 2.91 – 2.83 (m, 2H), 2.79 – 2.73 (m, 2H), 2.70 – 2.52 (m, 2H), 2.36 – 2.26 (m, 1H), 1.87 – 1.78 (m, 1H), 1.77 – 1.67 (m, 1H), 1.63 – 1.50 (m, 1H), 1.41 (bs, 1H), 0.86 (d, *J* = 6.1 Hz, 3H), 0.85 (d, *J* = 6.1 Hz, 3H).

<sup>13</sup>C NMR (101 MHz, CDCl<sub>3</sub>):  $\delta$  150.2, 147.6, 142.6, 136.1, 135.6, 128.27, 128.26, 125.6, 123.2, 62.6, 48.6, 34.0, 32.8, 32.5, 29.9, 18.5, 18.0.

IR (film, cm<sup>-1</sup>): 2952, 2867, 1477, 1453, 1106, 1028, 748, 698.

HRMS: *m/z* calcd for C<sub>19</sub>H<sub>27</sub>N<sub>2</sub> [M+H]<sup>+</sup> 283.2169; found 283.2163.

#### *N*-(4-Methyl-1-phenylpentan-3-yl)tetrahydro-2H-pyran-4-amine (6g)

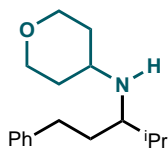

*N*-(4-Methyl-1-phenylpentan-3-yl)tetrahydro-2H-pyran-4-amine was prepared according to General Procedure **B** using Zn (52 mg, 0.8 mmol, 2 equiv), tetrahydro-2H-pyran-4-amine (41  $\mu$ L, 0.4 mmol, 1 equiv), hydrocinnamaldehyde (79  $\mu$ L, 0.6 mmol, 1.5 equiv), 2-iodopropane (100  $\mu$ L, 1.2 mmol, 2.5 equiv), and TMSOTf (108  $\mu$ L, 0.6 mmol, 1.5 equiv) in EtOAc (1 mL). Crude material was purified by column chromatography (0-2% MeOH in dichloromethane (with 5% Et<sub>3</sub>N)) yielding the product as a colourless oil (75 mg, 72%).

<sup>1</sup>H NMR (400 MHz, CDCl<sub>3</sub>):  $\delta$  7.34 – 7.28 (m, 2H), 7.26 – 7.16 (m, 3H), 3.98 (dd, *J* = 11.9, 3.6 Hz, 2H), 3.40 (tq, *J* = 11.6, 2.2 Hz, 2H), 2.81 – 2.59 (m, 3H), 2.47 (dt, *J* = 8.2, 4.5 Hz, 1H), 1.91 – 1.71 (m, 4H), 1.63 – 1.50 (m, 1H), 1.38 (dtd, *J* = 14.1, 11.0, 4.3 Hz, 2H), 0.92 (d, *J* = 6.8 Hz, 6H).

<sup>13</sup>C NMR (101 MHz, CDCl<sub>3</sub>):  $\delta$  142.7, 128.30, 128.26, 125.6, 66.8, 66.8, 58.6, 51.4, 34.5, 34.4, 33.1, 32.9, 30.2, 18.5, 17.9.

IR (film, cm<sup>-1</sup>): 2952, 2841, 1453, 1366, 1140, 1087, 867, 747, 697.

HRMS: *m/z* calcd for C<sub>17</sub>H<sub>28</sub>NO [M+H]<sup>+</sup> 262.2166; found 262.2169.

## Benzyl 4-((4-methyl-1-phenylpentan-3-yl)amino)piperidine-1-carboxylate (6h)

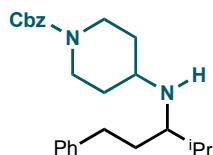

Benzyl 4-((4-methyl-1-phenylpentan-3-yl)amino)piperidine-1-carboxylate was prepared according to the general procedure **B** using Zn (52 mg, 0.8 mmol, 2 equiv), benzyl 4-aminopiperidine-1-carboxylate (94 mg, 0.4 mmol, 1 equiv), hydrocinnamaldehyde (79  $\mu$ L, 0.6 mmol, 1.5 equiv), 2-iodopropane (100  $\mu$ L, 1.2 mmol, 2.5 equiv), and TMSOTf (108  $\mu$ L, 0.6 mmol, 1.5 equiv) in EtOAc (1 mL). Crude material was purified by column chromatography (0-2% MeOH in dichloromethane (with 5% Et<sub>3</sub>N)) yielding the product as a colourless oil (146 mg, 93%).

**<sup>1</sup>H NMR** (400 MHz, CDCl<sub>3</sub>):  $\delta$  7.41 – 7.36 (m, 4H), 7.36 – 7.28 (m, 3H), 7.24 – 7.17 (m, 3H), 5.16 (bs, 2H), 4.15 – 3.99 (m, 2H), 2.95 (t, J = 12.3 Hz, 2H), 2.80 – 2.56 (m, 3H), 2.44 (dt, J = 8.3, 4.5 Hz, 1H), 1.90 – 1.66 (m, 4H), 1.60 – 1.47 (m, 1H), 1.27 (q, J = 11.7 Hz, 2H), 0.91 (d, J = 6.8 Hz, 6H).

**<sup>13</sup>C NMR** (101 MHz, CDCl<sub>3</sub>):  $\delta$  155.1, 142.6, 136.9, 128.3, 128.2, 128.2, 127.8, 127.7, 125.6, 66.9, 58.7, 51.9, 42.57, 42.55, 33.0, 32.8, 30.0, 18.4, 17.8.

**IR** (film, cm<sup>-1</sup>): 2941, 2867, 1692, 1429, 1224, 732, 696.

**HRMS**: m/z calcd for C<sub>25</sub>H<sub>35</sub>N<sub>2</sub>O<sub>2</sub> [M+H]<sup>+</sup> 395.2630; found 395.2694.

### 1-Ethynyl-N-(4-methyl-1-phenylpentan-3-yl)cyclohexan-1-amine (6i)

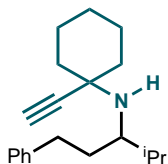

1-Ethynyl-N-(4-methyl-1-phenylpentan-3-yl)cyclohexan-1-amine was prepared according to General Procedure **B** using Zn (52 mg, 0.8 mmol, 2 equiv), 1-ethynylcyclohexan-1-amine (54  $\mu$ L, 0.4 mmol, 1 equiv), hydrocinnamaldehyde (79  $\mu$ L, 0.6 mmol, 1.5 equiv), 2-iodopropane (100  $\mu$ L, 1.2 mmol, 2.5 equiv), and TMSOTf (108  $\mu$ L, 0.6 mmol, 1.5 equiv) in EtOAc (1 mL). Crude material was purified by column chromatography (0-2% MeOH in dichloromethane (with 5% Et<sub>3</sub>N)) yielding the product as a colourless oil (78 mg, 69%).

<sup>1</sup>H NMR (400 MHz, CDCl<sub>3</sub>):  $\delta$  7.31 – 7.26 (m, 2H), 7.23 – 7.15 (m, 3H), 2.82 – 2.70 (m, 2H), 2.69 – 2.59 (m, 1H), 2.32 (s, 1H), 1.99 – 1.90 (m, 1H), 1.85 – 1.74 (m, 3H), 1.73 – 1.52 (m, 6H), 1.45 – 1.34 (m, 2H), 1.25 – 1.14 (m, 1H), 0.92 (d, J = 6.8 Hz, 3H), 0.90 (d, J = 6.9 Hz, 3H).

<sup>13</sup>C NMR (101 MHz, CDCl<sub>3</sub>):  $\delta$  143.1, 128.3, 128.2, 125.5, 89.2, 72.0, 57.6, 54.2, 39.42, 39.39, 34.4, 33.1, 31.3, 25.7, 22.82, 22.78, 18.5, 17.9.

IR (film, cm<sup>-1</sup>): 3302, 3025, 2930, 2855, 1449, 1112, 748, 697, 626, 556.

HRMS: m/z calcd for C<sub>20</sub>H<sub>30</sub>N [M+H]<sup>+</sup> 284.2373; found 284.2380.

### N-(4-Methyl-1-phenylpentan-3-yl)adamantan-1-amine (6j)

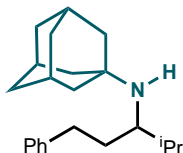

N-(4-Methyl-1-phenylpentan-3-yl)adamantan-1-amine was prepared according to General Procedure **B** using Zn (52 mg, 0.8 mmol, 2 equiv), (3*s*,5*s*,7*s*)-adamantan-1-amine (60 mg, 0.4 mmol, 1 equiv), hydrocinnamaldehyde (79  $\mu$ L, 0.6 mmol, 1.5 equiv), 2-iodopropane (100  $\mu$ L, 1.2 mmol, 2.5 equiv), and TMSOTf (108  $\mu$ L, 0.6 mmol, 1.5 equiv) in EtOAc (1 mL). Crude material was purified by column chromatography (0-2% MeOH in dichloromethane (with 5% Et<sub>3</sub>N)) yielding the product as a colourless oil (87 mg, 70%).

<sup>1</sup>H NMR (400 MHz, CDCl<sub>3</sub>):  $\delta$  7.29 (t, J = 7.5 Hz, 2H), 7.23 – 7.15 (m, 3H), 2.74 – 2.65 (m, 1H), 2.64 – 2.55 (m, 2H), 2.10 – 2.00 (m, 3H), 1.84 – 1.48 (m, 14H), 0.91 (d, J = 6.9 Hz, 3H), 0.89 (d, J = 6.9 Hz, 6H).

<sup>13</sup>C NMR (101 MHz, CDCl<sub>3</sub>):  $\delta$  143.0, 128.3, 128.2, 125.5, 54.2, 50.7, 44.3, 36.7, 35.6, 33.2, 31.9, 29.7, 18.3, 18.2.

IR (film, cm<sup>-1</sup>): 2900, 2846, 1451, 1142, 1096, 738, 697.

HRMS: m/z calcd for C<sub>22</sub>H<sub>34</sub>N [M+H]<sup>+</sup> 312.2686; found 312.2687.

### N-(4-Methyl-1-phenylpentan-3-yl)aniline (7a)

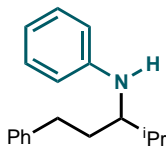

N-(4-Methyl-1-phenylpentan-3-yl)aniline was prepared according to General Procedure **B** using Zn (52 mg, 0.8 mmol, 2 equiv), aniline (36  $\mu$ L, 0.4 mmol, 1 equiv), hydrocinnamaldehyde (79  $\mu$ L, 0.6 mmol, 1.5 equiv), 2-iodopropane (100  $\mu$ L, 1.2 mmol, 2.5 equiv), and TMSOTf (144  $\mu$ L, 0.8 mmol, 2 equiv) in EtOAc (1 mL). Crude material was purified by column chromatography (0-1% MeOH in dichloromethane (with 5% Et<sub>3</sub>N)) yielding the product as a colourless oil (54 mg, 54%).

**<sup>1</sup>H NMR** (400 MHz, CDCl<sub>3</sub>):  $\delta$  7.32 – 7.25 (m, 2H), 7.24 – 7.13 (m, 5H), 6.66 (t, *J* = 7.3 Hz, 1H), 6.58 (d, *J* = 8.0 Hz, 2H), 3.49 (bs, 1H), 3.28 (dt, *J* = 8.7, 4.2 Hz, 1H), 2.86 – 2.76 (m, 1H), 2.71 – 2.59 (m, 1H), 2.01 – 1.84 (m, 2H), 1.74 – 1.58 (m, 1H), 0.95 (d, *J* = 6.9 Hz, 3H), 0.93 (d, *J* = 6.7 Hz, 3H).

**<sup>13</sup>C NMR** (101 MHz, CDCl<sub>3</sub>):  $\delta$  148.5, 142.3, 129.3, 128.4, 128.3, 125.8, 116.5, 112.9, 57.6, 33.5, 32.8, 31.2, 18.4, 18.3.

**IR** (film, cm<sup>-1</sup>): 3403, 2955, 2869, 1598, 1503, 1495, 1453, 1319, 1251, 743, 690.

**HRMS**: *m/z* calcd for C<sub>26</sub>H<sub>32</sub>N [M+H]<sup>+</sup> 254.1904; found: 254.1899.

### 4-Iodo-N-(4-methyl-1-phenylpentan-3-yl)aniline (7b)

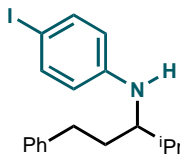

4-Iodo-N-(4-methyl-1-phenylpentan-3-yl)aniline was prepared according to General Procedure **B** using Zn (52 mg, 0.8 mmol, 2 equiv), 4-iodoaniline (88 mg, 0.4 mmol, 1 equiv), hydrocinnamaldehyde (79  $\mu$ L, 0.6 mmol, 1.5 equiv), 2-iodopropane (100  $\mu$ L, 1.2 mmol, 2.5 equiv), and TMSOTf (144  $\mu$ L, 0.8 mmol, 2 equiv) in EtOAc (1 mL). Crude material was purified by column chromatography (0-1% MeOH in dichloromethane (with 5% Et<sub>3</sub>N)) yielding the product as a colourless oil (48 mg, 32%).

**<sup>1</sup>H NMR** (400 MHz, CDCl<sub>3</sub>):  $\delta$  7.13 (d, *J* = 8.5 Hz, 2H), 7.05 – 6.99 (m, 2H), 6.97 – 6.87 (m, 3H), 6.08 (d, *J* = 8.3 Hz, 2H), 3.26 (bs, 1H), 2.94 (dt, *J* = 8.8, 4.2 Hz, 1H), 2.55 – 2.46 (m, 1H), 2.42 – 2.33 (m, 1H), 1.71 – 1.56 (m, 2H), 1.46 – 1.31 (m, 1H), 0.67 (d, *J* = 7.2 Hz, 3H), 0.65 (d, *J* = 7.9 Hz, 3H).

**<sup>13</sup>C NMR** (101 MHz, CDCl<sub>3</sub>):  $\delta$  148.1, 142.0, 137.7, 128.38, 128.36, 125.8, 115.1, 57.5, 33.5, 32.7, 31.3, 18.4, 18.2.

**IR** (film, cm<sup>-1</sup>): 3404, 3082, 2954, 2868, 1587, 1573, 1492, 1452, 1317, 1292, 806, 745, 697.

**HRMS**: *m/z* calcd for C<sub>18</sub>H<sub>23</sub>I [M+H]<sup>+</sup> 380.0870; found 380.0869.

#### 4-Methoxy-N-(4-methyl-1-phenylpentan-3-yl)aniline (7c)

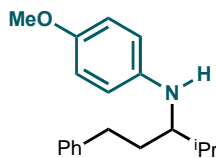

4-Methoxy-N-(4-methyl-1-phenylpentan-3-yl)aniline was prepared according to General Procedure **B** using Zn (52 mg, 0.8 mmol, 2 equiv), 4-methoxyaniline (49 mg, 0.4 mmol, 1 equiv), hydrocinnamaldehyde (79  $\mu$ L, 0.6 mmol, 1.5 equiv), 2-iodopropane (100  $\mu$ L, 1.2 mmol, 2.5 equiv), and TMSOTf (144  $\mu$ L, 0.8 mmol, 2 equiv) in EtOAc (1 mL). Crude material was purified by column chromatography (50-100% Pet. Ether in dichloromethane (with 5% Et<sub>3</sub>N)) yielding the product as a colourless oil (58 mg, 52%).

<sup>1</sup>H NMR (400 MHz, CDCl<sub>3</sub>):  $\delta$  7.37 – 7.28 (m, 2H), 7.27 – 7.18 (m, 3H), 6.84 – 6.78 (m, 2H), 6.57 (d, J = 8.8 Hz, 2H), 3.79 (s, 3H), 3.35 – 3.15 (m, 2H), 2.90 – 2.79 (m, 1H), 2.74 – 2.64 (m, 1H), 2.03 – 1.85 (m, 2H), 1.74 – 1.60 (m, 1H), 0.98 (d, J = 6.9 Hz, 3H), 1.02 – 0.91 (m, 6H).

<sup>13</sup>C NMR (101 MHz, CDCl<sub>3</sub>):  $\delta$  151.5, 142.8, 142.4, 128.4, 128.3, 125.7, 115.0, 114.2, 58.6, 55.8, 33.4, 32.9, 31.0, 18.4, 18.1.

IR (film, cm<sup>-1</sup>): 3025, 2953, 2829, 1508, 1453, 1230, 1038, 815, 748, 698.

HRMS: m/z calcd for C<sub>19</sub>H<sub>26</sub>NO [M+H]<sup>+</sup> 284.2009; found 284.2005.

#### 2,4,6-trimethyl-N-(4-methyl-1-phenylpentan-3-yl)aniline (7d)

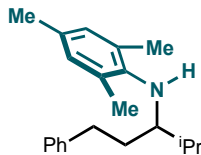

2,4,6-trimethyl-N-(4-methyl-1-phenylpentan-3-yl)aniline was prepared according to General Procedure **B** using Zn (52 mg, 0.8 mmol, 2 equiv), 2,4,6-trimethylaniline (56  $\mu$ L, 0.4 mmol, 1 equiv), benzyl hydrocinnamaldehyde (79  $\mu$ L, 0.6 mmol, 1.5 equiv), 2-iodopropane (100  $\mu$ L, 1.2 mmol, 2.5 equiv), and TMSOTf (144  $\mu$ L, 0.6 mmol, 2 equiv) in EtOAc (1 mL). Crude material was purified by column chromatography (50–100% Pet. Ether in dichloromethane with (5% Et<sub>3</sub>N)) yielding the product as a colourless oil (50 mg, 43%).

<sup>1</sup>H NMR (400 MHz, CDCl<sub>3</sub>):  $\delta$  7.34 – 7.27 (m, 2H), 7.21 (t, J = 7.3 Hz, 1H), 7.18 – 7.13 (m, 2H), 6.82 (s, 2H), 3.25 (dt, J = 8.0, 4.1 Hz, 1H), 3.01 (bs, 1H), 2.87 – 2.75 (m, 1H), 2.72 – 2.55 (m, 1H), 2.26 (s, 3H), 2.25 (s, 6H), 1.96 – 1.77 (m, 2H), 1.69 – 1.56 (m, 1H), 1.02 (d, J = 6.8 Hz, 3H), 0.98 (d, J = 7.0, 1.3 Hz, 3H).

<sup>13</sup>C NMR (101 MHz, CDCl<sub>3</sub>):  $\delta$  142.5, 129.8, 129.4, 128.30, 128.25, 127.7, 125.7, 60.0, 33.8, 33.2, 30.7, 20.4, 19.3, 18.1, 18.0.

IR (film, cm<sup>-1</sup>): 2954, 2868, 1482, 1453, 1264, 854, 734, 697, 561.

HRMS: m/z calcd for C<sub>21</sub>H<sub>30</sub>N [M+H]<sup>+</sup> 296.2373; found 296.2373.



**(1*S*,4*S*)-4-(3,4-Dichlorophenyl)-*N*-methyl-*N*-(4-methyl-1-phenylpentan-3-yl)-1,2,3,4-tetrahydronaphthalen-1-amine (8a)**

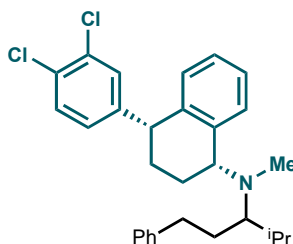

(1*S*,4*S*)-4-(3,4-Dichlorophenyl)-*N*-methyl-*N*-(4-methyl-1-phenylpentan-3-yl)-1,2,3,4-tetrahydronaphthalen-1-amine was prepared according to General Procedure A using Zn (52 mg, 0.8 mmol, 2 equiv), sertraline hydrochloride (137 mg, 0.4 mmol, 1 equiv), hydrocinnamaldehyde (79  $\mu$ L, 0.6 mmol, 1.5 equiv), 2-iodopropane (100  $\mu$ L, 1.2 mmol, 2.5 equiv), and TMSOTf (72  $\mu$ L, 0.4 mmol, 1 equiv) in EtOAc (1 mL). Crude material was purified by column chromatography (0-2% MeOH in dichloromethane (with 5% Et<sub>3</sub>N)) yielding the product as a colourless oil (115 mg, 62%, 2:1 d.r.).

**Major isomer:**

<sup>1</sup>H NMR (400 MHz, CDCl<sub>3</sub>):  $\delta$  7.89 (d, *J* = 7.9 Hz, 1H), 7.33 – 7.25 (m, 4H), 7.21 – 7.11 (m, 5H), 6.89 (d, *J* = 7.7 Hz, 1H), 6.82 (dt, *J* = 8.4, 1.5 Hz, 1H), 4.12 (t, *J* = 4.6 Hz, 1H), 3.93 (dd, *J* = 10.2, 5.5 Hz, 1H), 2.69 (t, *J* = 8.4 Hz, 2H), 2.55 (q, *J* = 5.6 Hz, 1H), 2.23 – 2.08 (m, 4H), 2.04 – 1.70 (m, 5H), 1.66 – 1.52 (m, 1H), 1.07 (d, *J* = 6.8 Hz, 3H), 1.05 (d, *J* = 6.9 Hz, 3H).

<sup>13</sup>C NMR (101 MHz, CDCl<sub>3</sub>):  $\delta$  147.7, 142.8, 140.2, 138.1, 132.1, 130.8, 130.2, 129.9, 129.8, 128.7, 128.33, 128.27, 128.2, 126.9, 126.6, 125.7, 67.1, 63.4, 43.7, 35.3, 32.2, 31.9, 30.7, 30.2, 20.1, 19.7, 18.8.

**Minor isomer:**

<sup>1</sup>H NMR (400 MHz, CDCl<sub>3</sub>)  $\delta$  7.79 (d, *J* = 7.8 Hz, 1H), 7.39 – 7.22 (m, 7H), 7.22 – 7.16 (m, 2H), 6.96 – 6.86 (m, 2H), 4.13 (t, *J* = 5.3 Hz, 1H), 3.98 (dd, *J* = 9.2, 5.1 Hz, 1H), 2.99 – 2.86 (m, 1H), 2.83 – 2.70 (m, 1H), 2.65 – 2.55 (m, 1H), 2.22 (s, 3H), 2.20 – 2.01 (m, 3H), 2.02 – 1.86 (m, 2H), 1.82 – 1.69 (m, 1H), 1.73 – 1.61 (m, 1H), 1.01 (d, *J* = 6.7 Hz, 3H), 0.98 (d, *J* = 7.0 Hz, 3H).

<sup>13</sup>C NMR (101 MHz, CDCl<sub>3</sub>)  $\delta$  147.8, 143.1, 140.1, 138.5, 132.1, 130.8, 130.21, 129.9, 129.8, 129.1, 128.4, 128.3, 128.2, 126.8, 126.6, 125.7, 67.1, 61.3, 43.9, 35.2, 31.5, 31.2, 30.6, 29.9, 21.8, 21.2, 19.1.

IR (film, cm<sup>-1</sup>): 2936, 2866, 1466, 1385, 1130, 1028, 823, 737, 698.

HRMS: *m/z* calcd for C<sub>29</sub>H<sub>34</sub>Cl<sub>2</sub>N [M+H]<sup>+</sup> 466.2063; found 466.2062.

**11-(4-(4-Methyl-1-phenylpentan-3-yl)piperazin-1-yl)dibenzo[b,f][1,4]thiazepine (8b)**

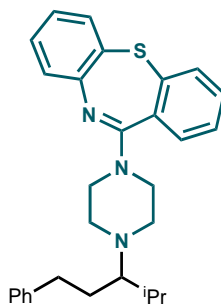

11-(4-(4-Methyl-1-phenylpentan-3-yl)piperazin-1-yl)dibenzo[b,f][1,4]thiazepine was prepared according to General Procedure **B** using Zn (52 mg, 0.8 mmol, 2 equiv), norquetiapine (118 mg, 0.4 mmol, 1 equiv), hydrocinnamaldehyde (79  $\mu$ L, 0.6 mmol, 1.5 equiv), 2-iodopropane (100  $\mu$ L, 1.2 mmol, 2.5 equiv), and TMSOTf (108  $\mu$ L, 0.6 mmol, 1.5 equiv) in EtOAc (1 mL). Crude material was purified by column chromatography (0-1% MeOH in dichloromethane (with 5% Et<sub>3</sub>N)) yielding the product as a colourless oil (102 mg, 56%).

**<sup>1</sup>H NMR** (500 MHz, CDCl<sub>3</sub>):  $\delta$  7.57 (dd,  $J = 7.4, 2.2$  Hz, 1H), 7.46 (dd,  $J = 7.8, 3.1$  Hz, 1H), 7.38 – 7.32 (m, 5H), 7.29 – 7.22 (m, 4H), 7.16 (t,  $J = 6.0$  Hz, 1H), 6.98 – 6.88 (m, 1H), 3.82 – 3.20 (m, 3H), 3.00 – 2.62 (m, 7H), 2.29 – 2.22 (m, 1H), 2.05 – 1.81 (m, 2H), 1.76 – 1.65 (m, 1H), 1.10 – 0.95 (m, 6H).

**<sup>13</sup>C NMR** (126 MHz, CDCl<sub>3</sub>):  $\delta$  161.2, 149.1, 143.0, 140.0, 134.4, 132.2, 132.1, 130.7, 129.2, 129.1, 128.5, 128.4, 128.3, 128.1, 125.7, 125.4, 122.7, 69.31, 69.28, 49.2, 34.8, 34.7, 29.7, 29.6, 21.63, 21.58, 20.2.

**IR** (film, cm<sup>-1</sup>): 3035, 2957, 2870, 1588, 1573, 1493, 1467, 1282, 1260, 1032, 746, 696.

**HRMS**:  $m/z$  calcd for C<sub>29</sub>H<sub>34</sub>N<sub>3</sub>S [M+H]<sup>+</sup> 456.2468; found 456.2472.

**Ethyl-1-cyclopropyl-6-fluoro-7-(4-(4-methyl-1-phenylpentan-3-yl)piperazin-1-yl)-4-oxo-1,4-dihydroquinoline-3-carboxylate (8c)**

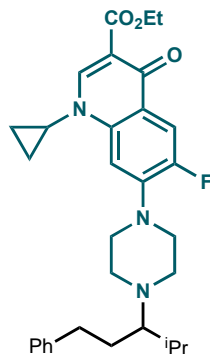

Ethyl-1-cyclopropyl-6-fluoro-7-(4-(4-methyl-1-phenylpentan-3-yl)piperazin-1-yl)-4-oxo-1,4-dihydroquinoline-3-carboxylate was prepared according to General Procedure **B** using Zn (52 mg, 0.8 mmol, 2 equiv), ciprofloxacin ethyl ester (prepared according to *Xu et al.*)<sup>2</sup> (144 mg, 0.4 mmol, 1 equiv), hydrocinnamaldehyde (79  $\mu$ L, 0.6 mmol, 1.5 equiv), 2-iodopropane (100  $\mu$ L, 1.2 mmol, 2.5 equiv), and TMSOTf (108  $\mu$ L, 0.6 mmol, 1.5 equiv) in EtOAc (1 mL). Crude material was purified by column chromatography (0-1% MeOH in dichloromethane (with 5% Et<sub>3</sub>N)) yielding the product as a colourless oil (89 mg, 43%).

**<sup>1</sup>H NMR** (400 MHz, CDCl<sub>3</sub>):  $\delta$  8.46 (s, 1H), 7.95 (d, *J* = 13.4 Hz, 1H), 7.30 – 7.15 (m, 6H), 4.36 (q, *J* = 7.1 Hz, 2H), 3.45 – 3.37 (m, 1H), 3.30 – 3.15 (m, 4H), 2.92 – 2.74 (m, 5H), 2.70 – 2.61 (m, 1H), 2.28 – 2.15 (m, 1H), 1.94 – 1.76 (m, 2H), 1.73 – 1.61 (m, 1H), 1.39 (t, *J* = 7.1 Hz, 3H), 1.30 (q, *J* = 6.7 Hz, 2H), 1.17 – 1.09 (m, 2H), 0.96 – 0.92 (m, 6H).

**<sup>13</sup>C NMR** (101 MHz, CDCl<sub>3</sub>):  $\delta$  173.0 (d, *J* = 2.1 Hz), 165.8, 153.3 (d, *J* = 248.6 Hz), 148.0, 144.8 (d, *J* = 9.9 Hz), 142.8, 137.9 (d, *J* = 1.2 Hz), 128.4, 128.3, 125.7, 122.7 (d, *J* = 7.1 Hz), 113.0 (d, *J* = 23.1 Hz), 110.2, 104.7, 69.2, 60.8, 50.9, 49.0, 34.8, 34.5, 29.5, 29.4, 21.5, 20.0, 14.4, 8.1.

**<sup>19</sup>F NMR** (471 MHz, CDCl<sub>3</sub>):  $\delta$  -123.39 (s)

**IR** (film, cm<sup>-1</sup>): 2952, 2810, 1705, 1695, 1610, 1495, 1280, 697.

**HRMS**: *m/z* calcd for C<sub>31</sub>H<sub>39</sub>FN<sub>3</sub>O<sub>3</sub> [M+H]<sup>+</sup> 520.2970; found 520.2965.

**Diethyl-4-(6-chlorocyclohexa-1,2,3,5-tetraen-1-yl)-2-methyl-6-((2-((4-methyl-1-phenylpentan-3-yl)amino)ethoxy)methyl)-1,4-dihydropyridine-3,5-dicarboxylate (8d)**

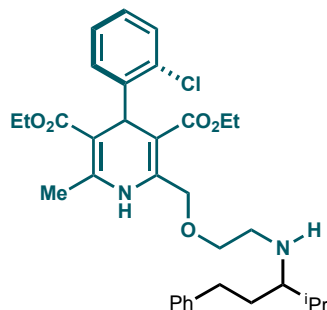

Diethyl-4-(6-chlorocyclohexa-1,2,3,5-tetraen-1-yl)-2-methyl-6-((2-((4-methyl-1-phenylpentan-3-yl)amino)ethoxy)methyl)-1,4-dihydropyridine-3,5-dicarboxylate was prepared according to General Procedure **B** using Zn (26 mg, 0.4 mmol, 2 equiv), amlodipine (82 mg, 0.2 mmol, 1 equiv), hydrocinnamaldehyde (40  $\mu$ L, 0.3 mmol, 1.5 equiv), 2-iodopropane (50  $\mu$ L, 0.6 mmol, 2.5 equiv), and TMSOTf (54  $\mu$ L, 0.3 mmol, 1.5 equiv) in EtOAc (1 mL). Crude material was purified by column chromatography (0-2% MeOH in dichloromethane (with 5% Et<sub>3</sub>N)) yielding the product as a colourless oil (38 mg, 33%).

**<sup>1</sup>H NMR** (500 MHz, CDCl<sub>3</sub>):  $\delta$  7.44 (s, 1H), 7.39 (dd,  $J$  = 7.7, 1.7 Hz, 1H), 7.33 – 7.27 (m, 2H), 7.26 – 7.18 (m, 4H), 7.16 – 7.10 (m, 1H), 7.08 – 7.03 (m, 1H), 5.44 (s, 1H), 4.89 – 4.77 (m, 1H), 4.71 (d,  $J$  = 16.1 Hz, 1H), 4.15 – 4.02 (m, 2H), 3.71 – 3.58 (m, 5H), 2.92 – 2.85 (m, 2H), 2.83 – 2.73 (m, 1H), 2.72 – 2.61 (m, 1H), 2.45 – 2.30 (m, 4H), 1.95 – 1.75 (m, 2H), 1.72 – 1.58 (m, 1H), 1.21 (t,  $J$  = 7.1 Hz, 3H), 1.02 – 0.90 (m, 6H).

**<sup>13</sup>C NMR** (126 MHz, CDCl<sub>3</sub>):  $\delta$  168.1, 167.2, 145.8, 145.6, 144.1, 142.4, 132.3, 131.5, 129.2, 128.4, 128.3, 127.3, 126.9, 125.9, 103.9, 101.4, 67.9, 62.9, 59.8, 50.8, 46.7, 37.2, 32.9, 32.5, 30.1, 19.4, 18.9, 18.3, 14.3.

**IR** (film, cm<sup>-1</sup>): 3403, 3060, 2868, 1686, 1477, 1431, 1277, 1204, 1092, 1030, 733, 698.

**HRMS**:  $m/z$  calcd for C<sub>33</sub>H<sub>42</sub>ClN<sub>2</sub>O<sub>5</sub> [M+H]<sup>+</sup> 581.2777; found 581.2776.

**N,4-dimethyl-1-phenyl-N-((R)-3-phenyl-3-(4-(trifluoromethyl)phenoxy)propyl)pentan-3-amine (8e)**

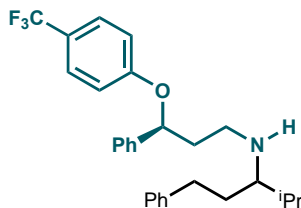

N,4-dimethyl-1-phenyl-N-((R)-3-phenyl-3-(4-(trifluoromethyl)phenoxy)propyl)pentan-3-amine was prepared according to General Procedure A using Zn (52 mg, 0.8 mmol, 2 equiv), fluoxetine hydrochloride (138 mg, 0.4 mmol, 1 equiv), hydrocinnamaldehyde (79  $\mu$ L, 0.6 mmol, 1.5 equiv), 2-iodopropane (100  $\mu$ L, 1.2 mmol, 2.5 equiv), and TMSOTf (72  $\mu$ L, 0.4 mmol, 1 equiv) in EtOAc (1 mL). Crude material was purified by column chromatography (0-2% MeOH in dichloromethane (with 5% Et<sub>3</sub>N)) yielding the product as a colourless oil (156 mg, 84%, 1:1.1 d.r.). Data was in line with previous characterisation.<sup>1</sup>

## 5.2 Aldehyde scope

### N-benzyl-N,2-dimethyltridec-12-en-3-amine (9a)

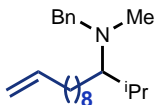

N-benzyl-N,2-dimethyltridec-12-en-3-amine was prepared according to General Procedure C using Zn (26 mg, 0.4 mmol, 2 equiv), N-methylbenzylamine hydrochloride (32 mg, 0.2 mmol, 1 equiv), undec-10-enal (80  $\mu$ L, 0.4 mmol, 2 equiv), 2-iodopropane (68  $\mu$ L, 0.4 mmol, 2 equiv) and TBSOTf (45  $\mu$ L, 0.2 mmol, 1 equiv) in EtOAc (1 mL). The product was obtained as a yellow oil (51 mg, 82%).

**$^1\text{H}$  NMR** (400 MHz,  $\text{CDCl}_3$ ):  $\delta$  7.37 - 7.27 (m, 4H), 7.25 - 7.19 (m, 1H), 5.89 - 5.78 (m, 1H), 5.04 - 4.97 (m, 1H), 4.97 - 4.92 (m, 1H), 3.67 (dq,  $J = 13.8, 1.7$  Hz, 1H), 3.63 (dq,  $J = 13.8, 1.0$  Hz, 1H), 2.23 - 2.15 (m, 4H), 2.09 - 2.02 (m, 2H), 1.88 - 1.78 (m, 1H), 1.46 - 1.24 (m, 14H), 1.00 (d,  $J = 6.8$  Hz, 3H), 0.93 (d,  $J = 6.7$  Hz, 3H).

**$^{13}\text{C}$  NMR** (101 MHz,  $\text{CDCl}_3$ ):  $\delta$  141.3, 139.4, 128.6, 128.2, 126.6, 114.2, 69.4, 59.3, 37.2, 34.0, 30.6, 30.3, 29.8, 29.7, 29.3, 29.1, 29.0, 27.9, 21.7, 20.6.

**IR** (film,  $\text{cm}^{-1}$ ): 3075, 3026, 2924, 2852, 2786, 1620, 1494, 1465, 1452, 1362, 1026, 992, 908, 732.

**HRMS**:  $m/z$  calcd for  $\text{C}_{22}\text{H}_{37}\text{N}$   $[\text{M}+\text{H}]^+$  316.2999; found 316.3007.

## Ethyl 6-(benzyl(methyl)amino)-7-methyloctanoate (9b)

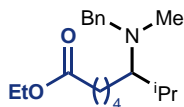

Ethyl 6-(benzyl(methyl)amino)-7-methyloctanoate was prepared according to General Procedure C using Zn (26 mg, 0.4 mmol, 2 equiv), N-methylbenzylamine hydrochloride (32 mg, 0.2 mmol, 1 equiv), ethyl 6-oxohexanoate (synthesised using the procedure from Czekelius et al)<sup>3</sup> (48 mg, 0.3 mmol, 1.5 equiv), 2-iodopropane (68  $\mu$ L, 0.4 mmol, 2 equiv) and TBSOTf (45  $\mu$ L, 0.2 mmol, 1 equiv) in EtOAc (1 mL) with modifications.

After the reaction, the mixture was diluted with dichloromethane and filtered to remove unreacted zinc. It was then diluted with H<sub>2</sub>O. Saturated aq NaHCO<sub>3</sub> (0.3 mL) was added. The organic and aqueous layers were separated. The aqueous layer was extracted with dichloromethane twice. 1% NaOH was added to the aqueous layer. The aqueous layer was extracted with dichloromethane twice. The combined organic layer was dried over Na<sub>2</sub>SO<sub>4</sub> and filtered. Solvent was removed *in vacuo*. Petroleum ether and H<sub>2</sub>O were added. HCl (3M, aq) was added until pH is lower than 4. The organic and aqueous layers were shake vigorously in a separating funnel and separated. Saturated aq NaHCO<sub>3</sub> was added to the aqueous layer until pH is higher than 9. Dichloromethane was added. The organic and aqueous layers were shake vigorously in a separating funnel and separated. 1% NaOH was added to the aqueous layer. The aqueous layer was extracted with dichloromethane twice. The combined organic layer was dried over Na<sub>2</sub>SO<sub>4</sub> and filtered. The solvent was removed *in vacuo* to afford pure product (43.7 mg, 82%) as a colourless oil.

<sup>1</sup>H NMR (600 MHz, CDCl<sub>3</sub>):  $\delta$  7.34 - 7.27 (m, 4H), 7.23 - 7.19 (m, 1H), 4.14 (q, J = 7.1 Hz, 2H), 3.65 (d, J = 13.7 Hz, 1H), 3.64 (d, J = 13.7 Hz, 1H), 2.33 (t, J = 7.6 Hz, 2H), 2.21 (td, J = 7.2, 4.4 Hz, 1H), 2.16 (s, 3H), 1.83 (octet, J = 6.7 Hz, 1H), 1.69 - 1.62 (m, 2H), 1.58 - 1.46 (m, 2H), 1.42 - 1.32 (m, 2H), 1.26 (t, J = 7.1 Hz, 3H), 0.98 (d, J = 6.7 Hz, 3H), 0.92 (d, J = 6.7 Hz, 3H).

<sup>13</sup>C NMR (151 MHz, CDCl<sub>3</sub>):  $\delta$  174.0, 141.1, 128.6, 128.2, 126.7, 69.1, 60.3, 59.3, 37.1, 34.6, 30.5, 28.4, 27.5, 25.6, 21.7, 20.6, 14.4

IR (film, cm<sup>-1</sup>): 3026, 2934, 2869, 1733, 1453, 1371, 1176, 1027, 733, 698.

HRMS: m/z calcd for C<sub>19</sub>H<sub>31</sub>NO<sub>2</sub> [M+H]<sup>+</sup> 306.2428 ; found 306.2432.

## Synthesis of 6-(1,2,3,4-tetrahydro-9H-carbazol-9-yl)hexanal

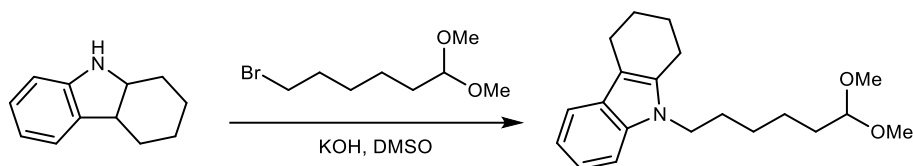

1,2,3,4-tetrahydrocarbazole (617 mg, 3.6 mmol 1 equiv), 6-bromo-1,1-dimethoxyhexane (811 mg, 3.6 mmol, 1 equiv) and KOH (808 mg, 14.4 mmol, 4 equiv) were dissolved in DMSO (9 mL). The mixture was stirred at rt for 48 hours. The reaction was quenched with saturated aqueous  $\text{NH}_4\text{Cl}$ . dichloromethane was added. The aqueous and organic layer were separated. The aqueous layer was extracted with dichloromethane. The combined organic layer was washed with  $\text{H}_2\text{O}$  and brine twice respectively, dried over  $\text{Na}_2\text{SO}_4$  and filtered. The solvent was removed *in vacuo*. The crude mixture was purified by column chromatography (10-20%  $\text{Et}_2\text{O}$  in Pet. Ether) to afford 9-(6,6-dimethoxyhexyl)-2,3,4,9-tetrahydro-1H-carbazole (1.0 g, 88%) as a colourless oil.

$^1\text{H NMR}$  (400 MHz,  $\text{CDCl}_3$ ):  $\delta$  7.47 (d,  $J = 7.6$  Hz, 1H), 7.26 (d,  $J = 7.8$  Hz, 1H), 7.14 (td,  $J = 7.1, 1.0$  Hz, 1H), 7.06 (td,  $J = 7.5, 0.9$ , 1H), 4.33 (t,  $J = 5.7$  Hz, 1H), 4.00 (t,  $J = 7.4$  Hz, 2H), 3.31 (s, 6H), 2.77 - 2.68 (m, 4H), 1.99 - 1.82 (m, 4H), 1.75 (quint,  $J = 7.3$  Hz, 2H), 1.63 - 1.53 (m, 2H), 1.44 - 1.34 (m, 4H).

$^{13}\text{C NMR}$  (101 MHz,  $\text{CDCl}_3$ ):  $\delta$  136.2, 135.4, 127.4, 120.6, 118.6, 117.9, 109.4, 108.9, 104.6, 52.9, 43.0, 32.6, 30.5, 27.2, 24.5, 23.5, 23.4, 22.5, 21.3.

**IR** (film,  $\text{cm}^{-1}$ ): 3062, 2930, 2854, 2833, 1467, 1426, 1371, 1316, 1181, 1130, 1051, 736.

**HRMS**:  $m/z$  calcd for  $\text{C}_{20}\text{H}_{29}\text{NO}_2$   $[\text{M}+\text{H}]^+$  316.2272, found 316.2269.

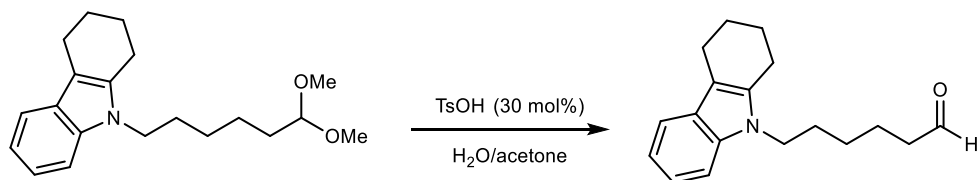

9-(6,6-dimethoxyhexyl)-2,3,4,9-tetrahydro-1H-carbazole (895 mg, 2.84 mmol, 1 equiv) was dissolved in water (9.5 mL) and acetone (47 mL). TsOH monohydrate (162 mg, 0.85 mmol, 30 mol%) was added. The reaction mixture was stirred at 40 °C for 4 h. The mixture was diluted with  $\text{Et}_2\text{O}$ . Saturated aqueous  $\text{NaHCO}_3$  was added. The organic and aqueous layers were separated. The aqueous layer was extracted twice with  $\text{Et}_2\text{O}$ . The combined organic layer was washed with brine, dried over  $\text{Na}_2\text{SO}_4$  and filtered. The solvent was removed *in vacuo*. The crude product was purified by column chromatography (10-20%  $\text{Et}_2\text{O}$  in Pet. Ether) to afford 6-(1,2,3,4-tetrahydro-9H-carbazol-9-yl)hexanal (720 mg, 94%) as a colourless oil.

$^1\text{H NMR}$  (400 MHz,  $\text{CDCl}_3$ ):  $\delta$  9.77 (t,  $J = 1.5$  Hz, 1H), 7.49 (d,  $J = 8.1$  Hz, 1H), 7.27 (d,  $J = 8.2$  Hz, 1H), 7.16 (td,  $J = 7.5, 1.2$  Hz, 1H), 7.08 (td,  $J = 7.4, 1.1$  Hz, 1H), 4.04 (t,  $J = 7.3$  Hz, 2H), 2.79-2.69 (m, 4H), 2.45 (td,  $J = 7.2, 1.5$  Hz, 2H), 2.01-1.93 (m, 2H), 1.93 - 1.85 (m, 2H), 1.78 (quint,  $J = 7.6$  Hz, 2H), 1.68 (quint,  $J = 7.6$  Hz, 2H), 1.46 - 1.37 (m, 2H).

$^{13}\text{C NMR}$  (176 MHz,  $\text{CDCl}_3$ ):  $\delta$  202.4, 136.1, 135.2, 127.3, 120.5, 118.6, 117.8, 109.4, 108.7, 43.7, 42.6, 30.2, 26.7, 23.4, 23.3, 22.3, 21.8, 21.1.

**IR** (film,  $\text{cm}^{-1}$ ): 3048, 2930, 2852, 2718, 1722, 1613, 1468, 1444, 1426, 1372, 738.

**HRMS**:  $m/z$  calcd for  $\text{C}_{20}\text{H}_{23}\text{NO}$   $[\text{M}+\text{H}]^+$  270.1853, found 270.1853.



**N-benzyl-N,2-dimethyl-8-(1,2,3,4-tetrahydro-9H-carbazol-9-yl)octan-3-amine (9c)**

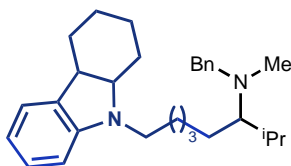

N-benzyl-N,2-dimethyl-8-(1,2,3,4-tetrahydro-9H-carbazol-9-yl)octan-3-amine was prepared according to General Procedure C using Zn (26 mg, 0.4 mmol, 2 equiv), N-methylbenzylamine hydrochloride (32 mg, 0.2 mmol, 1 equiv), 6-(1,2,3,4-tetrahydro-9H-carbazol-9-yl)hexanal (108 mg, 0.4 mmol, 2 equiv), 2-iodopropane (68  $\mu$ L, 0.4 mmol, 2 equiv) and TBSOTf (45  $\mu$ L, 0.2 mmol, 1 equiv) in EtOAc (1 mL). Crude material was purified by column chromatography (10-12% Et<sub>2</sub>O in Pet. Ether) yielding the product as a colourless oil (34 mg, 40%).

**<sup>1</sup>H NMR** (500 MHz, CDCl<sub>3</sub>):  $\delta$  7.48 (d, J = 7.7 Hz, 1H), 7.35 - 7.29 (m, 5H), 7.26 - 7.22 (m, 1H), 7.16 - 7.13 (m, 1H), 7.09 - 7.05 (m, 1H), 4.02 (t, J = 7.5 Hz, 2H), 3.65 (d, J = 13.7 Hz, 1H), 3.62 (d, J = 13.7 Hz, 1H), 2.77 - 2.71 (m, 4H), 2.21 - 2.17 (m, 1H), 2.16 (s, 3H), 1.98 - 1.93 (m, 2H), 1.90 - 1.80 (m, 3H), 1.77 (quint, J = 7.4 Hz, 2H), 1.54 - 1.47 (m, 2H), 1.41 - 1.29 (m, 4H), 0.98 (d, J = 6.7 Hz, 3H), 0.91 (d, J = 6.7 Hz, 3H).

**<sup>13</sup>C NMR** (100 MHz, CDCl<sub>3</sub>):  $\delta$  141.2, 136.2, 135.4, 128.6, 128.2, 127.4, 126.7, 120.5, 118.6, 117.9, 109.3, 108.9, 69.1, 59.4, 43.1, 37.1, 30.6, 30.4, 28.7, 27.7, 23.5, 23.4, 22.5, 21.8, 21.2, 20.6.

**IR** (film, cm<sup>-1</sup>): 3026, 2928, 2853, 2785, 1613, 1584, 1493, 1467, 1426, 1371, 1316, 1233, 1178, 1145, 1014, 734, 697.

**HRMS**: m/z calcd for C<sub>29</sub>H<sub>40</sub>N<sub>2</sub> [M+H]<sup>+</sup> 417.3265; ; found 417.3268.

### Benzyl 4-(2-(benzyl(methyl)amino)-3-methylbutyl)piperidine-1-carboxylate (9d)

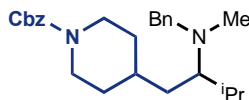

Benzyl 4-(2-(benzyl(methyl)amino)-3-methylbutyl)piperidine-1-carboxylate was prepared according to General Procedure C using Zn (26 mg, 0.4 mmol, 2 equiv), N-methylbenzylamine hydrochloride (32 mg, 0.2 mmol, 1 equiv), benzyl 4-(2-oxoethyl)piperidine-1-carboxylate (105 mg, 0.4 mmol, 2 equiv), 2-iodopropane (68  $\mu$ L, 0.4 mmol, 2 equiv) and TBSOTf (45  $\mu$ L, 0.2 mmol, 1 equiv) in EtOAc (1 mL). Crude material was purified by column chromatography (15-30% Et<sub>2</sub>O in Pet. Ether) yielding the product as a colourless oil (47 mg, 58%).

**<sup>1</sup>H NMR** (500 MHz, CDCl<sub>3</sub>):  $\delta$  7.40 - 7.35 (m, 4H), 7.34 - 7.28 (m, 5H), 7.25 - 7.21 (m, 1H), 5.15 (s, 2H), 4.32-4.06 (m, 2H), 3.69 (d, J = 13.6 Hz, 1H), 3.64 (d, J = 13.6, 1H), 2.87 - 2.65 (m, 2H), 2.39-2.33 (m, 1H), 2.20 (s, 3H), 1.90 (octet, J = 6.7 Hz, 1H), 1.79 - 1.57 (m, 3H), 1.52 - 1.46 (m, 1H), 1.19 - 1.11 (m, 2H), 1.07 - 0.97 (m, 4H), 0.92 (d, J = 6.7 Hz, 3H).

**<sup>13</sup>C NMR** (101 MHz, CDCl<sub>3</sub>):  $\delta$  155.4, 140.9, 137.2, 128.6, 128.3, 128.0, 127.9, 126.8, 67.0, 65.0, 59.4, 44.6, 44.4, 36.9, 34.8, 33.7, 33.2, 31.9, 29.8, 22.1, 20.4.

**IR** (film, cm<sup>-1</sup>): 3062, 3029, 2926, 2869, 2845, 2786, 1696, 1494, 1467, 1276, 1240, 1215, 1073, 1018, 732, 695.

**HRMS**: m/z calcd for C<sub>26</sub>H<sub>36</sub>N<sub>2</sub>O<sub>2</sub> [M+H]<sup>+</sup> 409.2850, found 409.2860.

### N-benzyl-N,2,5-trimethylhexan-3-amine (9e)

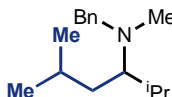

N-benzyl-N,2,5-trimethylhexan-3-amine was prepared according to General Procedure C using Zn (26 mg, 0.4 mmol, 2 equiv), N-methylbenzylamine hydrochloride (32 mg, 0.2 mmol, 1 equiv), 3-methylbutanal (43  $\mu$ L, 0.4 mmol, 2 equiv), 2-iodopropane (68  $\mu$ L, 0.4 mmol, 2 equiv) and TBSOTf (45  $\mu$ L, 0.2 mmol, 1 equiv) in EtOAc (1 mL). The pure product was obtained as a yellow oil (44 mg, 94%).

**<sup>1</sup>H NMR** (400 MHz, CDCl<sub>3</sub>):  $\delta$  7.39 - 7.21 (m, 4H), 7.28 - 7.22 (m, 1H), 3.70 (s, 2H), 2.39 - 2.34 (m, 1H), 2.20 (s, 3H), 1.92 - 1.77 (m, 2H), 1.54 - 1.47 (m, 1H), 1.18 - 1.11 (m, 1H), 1.04 (d, J = 6.8 Hz, 3H), 0.98 (d, J = 3.0 Hz, 3H), 0.96 (d, J = 3.0 Hz, 3H), 0.93 (d, J = 6.5 Hz, 3H).

**<sup>13</sup>C NMR** (101 MHz, CDCl<sub>3</sub>):  $\delta$  141.4, 128.6, 128.2, 126.6, 66.8, 59.2, 37.4, 37.1, 30.6, 26.1, 23.7, 22.6, 21.9, 20.6.

**IR** (film, cm<sup>-1</sup>): 3063, 3026, 2952, 2928, 2867, 1494, 1466, 1462, 1383, 1366, 1027, 732.

**HRMS**: m/z calcd for C<sub>16</sub>H<sub>27</sub>N [M+H]<sup>+</sup> 234.2217; found 234.2217.

### N-benzyl-N,2,5,5-tetramethylhexan-3-amine (9f)

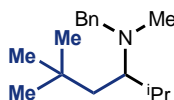

N-benzyl-N,2,5,5-tetramethylhexan-3-amine was prepared according to General Procedure C using Zn (52 mg, 0.8 mmol, 4 equiv), N-methylbenzylamine hydrochloride (32 mg, 0.2 mmol, 1 equiv), 3,3-dimethylbutanal (50  $\mu$ L, 0.4 mmol, 2 equiv), 2-iodopropane (136  $\mu$ L, 0.8 mmol, 4 equiv) and TBSOTf (45  $\mu$ L, 0.2 mmol, 1 equiv) in EtOAc (1 mL). The pure product was obtained as a yellow oil (47 mg, 95%)

$^1\text{H NMR}$  (400 MHz,  $\text{CDCl}_3$ ):  $\delta$  7.37 - 7.27 (m, 4H), 7.25 - 7.20 (m, 1H), 3.77 (d,  $J = 13.6$  Hz, 1H), 3.62 (d,  $J = 13.6$  Hz, 1H), 2.53 - 2.46 (m, 1H), 2.18 (s, 3H), 2.04 - 1.93 (m, 1H), 1.47 (dd,  $J = 14.4$  Hz, 7.8 Hz, 1H), 1.16 (dd,  $J = 14.5$  Hz, 2.8 Hz, 1H), 0.98 (s, 9H), 0.95 (d,  $J = 6.8$  Hz, 6H).

$^{13}\text{C NMR}$  (101 MHz,  $\text{CDCl}_3$ ):  $\delta$  141.2, 128.7, 128.2, 126.6, 65.9, 59.3, 40.6, 37.6, 30.6, 29.1, 22.2, 20.3.

**IR** (film,  $\text{cm}^{-1}$ ): 3063, 3027, 2951, 2867, 2786, 1494, 1465, 1463, 1388, 1363, 1244, 1216, 1045, 1020, 909, 723, 697.

**HRMS**:  $m/z$  calcd for  $\text{C}_{17}\text{H}_{29}\text{N}$   $[\text{M}+\text{H}]^+$  248.2373; found 248.2375.

### N-benzyl-N,2,4-trimethylpentan-3-amine (9g)

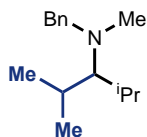

N-benzyl-N,2,4-trimethylpentan-3-amine was prepared according to General Procedure C using Zn (52 mg, 0.8 mmol, 4 equiv), N-methylbenzylamine hydrochloride (32 mg, 0.2 mmol, 1 equiv), isobutyraldehyde (37  $\mu$ L, 0.4 mmol, 2 equiv), 2-iodopropane (136  $\mu$ L, 0.8 mmol, 4 equiv) and TBSOTf (45  $\mu$ L, 0.2 mmol, 1 equiv) in EtOAc (1 mL). The pure product was obtained as a yellow oil (44 mg, 95%). Data was in line with previous characterisation.<sup>1</sup>

### N-benzyl-1-(cyclohex-3-en-1-yl)-N,2-dimethylpropan-1-amine (9h)

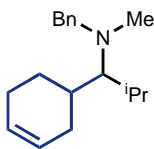

N-benzyl-1-(cyclohex-3-en-1-yl)-N,2-dimethylpropan-1-amine was prepared according to General Procedure C using Zn (52 mg, 0.8 mmol, 4 equiv), N-methylbenzylamine hydrochloride (32 mg, 0.2 mmol, 1 equiv), cyclohex-3-ene-1-carbaldehyde (47  $\mu$ L, 0.4 mmol, 2 equiv), 2-iodopropane (136  $\mu$ L, 0.8 mmol, 4 equiv) and TMSCl (25  $\mu$ L, 0.2 mmol, 1 equiv) in EtOAc (1 mL). The pure product was obtained as a colourless oil (43 mg, 1.7:1 d.r., 82%)

*Note: TMSCl was used instead of TBSOTf due to electron rich  $\pi$  system.*

**$^1\text{H NMR}$**  (700 MHz,  $\text{CDCl}_3$ ):  $\delta$  7.27 - 7.33 (m, 2H), 7.32 - 7.28 (m, 2H), 7.23 - 7.20 (m, 1H); 5.74 - 5.65 (m, 2H), 3.81 (s, 1.28H), 3.74 (s, 0.72H), 2.28 (s, 1.93H), 2.23 - 2.20 (m, 2.08H), 2.19 - 2.14 (m, 0.36H), 2.12 - 1.90 (m, 6.28H), 1.81 - 1.7 (m, 0.36H), 1.47 - 1.33 (m, 1H), 1.03 - 0.99 (m, 6H).

**$^{13}\text{C NMR}$**  (175 MHz,  $\text{CDCl}_3$ ):  $\delta$  141.4, 141.3, 128.6, 128.5, 128.23, 128.21, 127.5, 127.4, 127.1, 127.0, 126.63, 126.60, 73.4, 72.8, 61.0, 60.6, 39.2, 38.3, 35.4, 34.6, 30.9, 30.8, 28.6, 28.0, 27.4, 27.0, 26.1, 25.8, 21.9, 21.6, 21.3, 21.1.

**IR** (film,  $\text{cm}^{-1}$ ): 3084, 3062, 3021, 2955, 2908, 2872, 2835, 2785, 1653, 1603, 1494, 1452, 1435, 1386, 1362, 1023, 734, 698, 656.

**HRMS**:  $m/z$  calcd for  $\text{C}_{18}\text{H}_{27}\text{N}$   $[\text{M}+\text{H}]^+$  258.2217; found 258.2223.

### N-benzyl-N,2-dimethyl-1-(tetrahydro-2H-pyran-4-yl)propan-1-amine (9i)

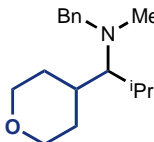

N-benzyl-N,2-dimethyl-1-(tetrahydro-2H-pyran-4-yl)propan-1-amine was prepared according to General Procedure C using Zn (26 mg, 0.4 mmol, 2 equiv), N-methylbenzylamine hydrochloride (32 mg, 0.2 mmol, 1 equiv), tetrahydro-2H-pyran-4-carbaldehyde (41  $\mu$ L, 0.4 mmol, 2 equiv), 2-iodopropane (68  $\mu$ L, 0.4 mmol, 2 equiv) and TBSOTf (45  $\mu$ L, 0.2 mmol, 1 equiv) in EtOAc (1 mL). The pure product was obtained as a yellow oil (44 mg, 85%). Data was in line with previous characterisation.<sup>1</sup>

### N-benzyl-N,3-dimethyl-1-phenylbutan-2-amine (9j)

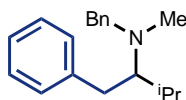

N-benzyl-N,3-dimethyl-1-phenylbutan-2-amine was prepared according to General Procedure C using Zn (52 mg, 0.8 mmol, 4 equiv), N-methylbenzylamine hydrochloride (32 mg, 0.2 mmol, 1 equiv), 2-phenylacetaldehyde (46  $\mu$ L, 0.4 mmol, 2 equiv), 2-iodopropane (136  $\mu$ L, 0.8 mmol, 4 equiv) and TBSOTf (45  $\mu$ L, 0.2 mmol, 1 equiv) in EtOAc (1 mL). The pure product was obtained as a colourless oil (51 mg, 95%).

**<sup>1</sup>H NMR** (400 MHz, CDCl<sub>3</sub>):  $\delta$  7.34 - 7.14 (m, 10H), 3.61 (s, 2H), 2.92 (dd, J = 14.0, 7.0 Hz, 1H), 2.78 - 2.65 (m, 2H), 2.25 (s, 3H), 1.91 (octet, J = 6.7 Hz, 1H), 1.08 (d, J = 6.6 Hz, 3H), 0.97 (d, J = 6.6 Hz, 3H).

**<sup>13</sup>C NMR** (101 MHz, CDCl<sub>3</sub>):  $\delta$  142.6, 141.0, 129.4, 128.6, 128.3, 128.1, 126.6, 125.7, 71.2, 60.0, 37.0, 34.3, 31.4, 21.4, 21.2.

**IR** (film, cm<sup>-1</sup>): 3083, 3061, 3025, 2954, 2871, 2843, 2786, 1602, 1494, 1467, 1453, 1363, 1026, 733, 697.

**HRMS**: m/z calcd for C<sub>19</sub>H<sub>25</sub>N [M+H]<sup>+</sup> 268.2060; found 268.2072.

### N-benzyl-1-(3,4-dimethoxyphenyl)-N,3-dimethylbutan-2-amine (9k)

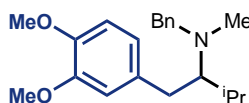

N-benzyl-1-(3,4-dimethoxyphenyl)-N,3-dimethylbutan-2-amine was prepared according to General Procedure C using Zn (39 mg, 0.6 mmol, 3 equiv), N-methylbenzylamine hydrochloride (32 mg, 0.2 mmol, 1 equiv), 2-(3,4-dimethoxyphenyl)acetaldehyde (synthesised using the procedure from *Couture et al*)<sup>4</sup> (63  $\mu$ L, 0.4 mmol, 2 equiv), 2-iodopropane (102  $\mu$ L, 0.6 mmol, 3 equiv) and TESCl (34  $\mu$ L, 0.2 mmol, 1 equiv) in EtOAc (1 mL). Crude material was purified by column chromatography (20-50% Et<sub>2</sub>O in Pet. Ether) yielding the product as a colourless oil (43 mg, 66%).

*Note: It should be noted that TESCl, instead of TBSOTf, was used.*

**<sup>1</sup>H NMR** (400 MHz, CDCl<sub>3</sub>):  $\delta$  7.26 - 7.16 (m, 5H), 6.82 - 6.70 (m, 3H), 3.88 (s, 3H), 3.83 (s, 3H), 3.59 (s, 2H), 2.87 - 2.79 (m, 1H), 2.69-2.58 (m, 2H), 2.24 (s, 3H), 1.94 - 1.82 (m, 1H), 1.04 (d, J = 6.7 Hz, 3H), 0.94 (d, J = 6.7 Hz, 3H).

**<sup>13</sup>C NMR** (101 MHz, CDCl<sub>3</sub>):  $\delta$  148.8, 147.2, 140.9, 135.1, 128.6, 128.1, 126.6, 121.2, 112.7, 111.2, 70.7, 59.9, 56.1, 60.0, 37.0, 33.8, 31.3, 21.4, 21.1.

**IR** (film, cm<sup>-1</sup>): 3060, 3025, 2951, 2932, 2870, 2833, 2785, 1589, 1514, 1493, 1463, 1451, 1416, 1260, 1237, 1191, 1154, 1140, 1027, 807, 784, 766, 735, 699.

**HRMS**: m/z calcd for C<sub>21</sub>H<sub>29</sub>NO<sub>2</sub> [M+H]<sup>+</sup> 328.2272; found 328.2274.

### N-Benzyl-N-methyl-1-phenylpropan-3-amine (9l)

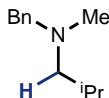

N-Benzyl-N-methyl-1-phenylpropan-3-amine was prepared according to General Procedure C with modifications. An oven dried vial (Biotage Microwave Process Vial 10 mL, equipped with gas-tight pierceable caps) was charged with a stir bar, Zn dust (52 mg, 0.8 mmol, 2 equiv) and paraformaldehyde (36 mg, 1.2 mmol, 3 equiv). The vial was sealed, evacuated, and backfilled with N<sub>2</sub>. *n*BuOAc (1 mL) and N-methylbenzylamine (52  $\mu$ L, 0.4 mmol, 1.0 equiv) were added. The mixture was stirred for 10 min. To this was added 2-iodopropane (100  $\mu$ L, 1.0 mmol, 2.5 equiv). The reaction mixture was stirred for one minute, followed by the addition of TMSOTf (108  $\mu$ L, 0.3 mmol, 1.5 equiv). The reaction mixture was stirred for 18 h. The crude mixture was worked up according to general procedure C. Crude material was purified by column chromatography (5-10% EtOAc in Pet. Ether) yielding the product as a colourless oil (14 mg, 39%).

**<sup>1</sup>H NMR** (500MHz, CDCl<sub>3</sub>)  $\delta$  7.35 - 7.29 (m, 4H), 7.26 – 7.21 (m, 1H), 3.46 (s, 2H), 2.16 (s, 3H), 2.12 (d, *J* = 7.4 Hz, 2H), 1.88- 1.76 (m, 1H), 0.91 (d, *J* = 6.6 Hz, 6H).

**<sup>13</sup>C NMR** (126 MHz, CDCl<sub>3</sub>)  $\delta$  139.7, 128.9, 128.1, 126.7, 66.1, 62.7, 42.7, 26.2, 20.8.

**IR** (film, cm<sup>-1</sup>):2952, 2783, 1452, 1035, 1026, 735, 697.

**HRMS**: *m/z* calcd for C<sub>12</sub>H<sub>19</sub>N [M+H]<sup>+</sup> 178.1590; found 178.1590.

### N-benzyl-N,2-dimethyl-6-(5-methylfuran-2-yl)hexan-3-amine (9m)

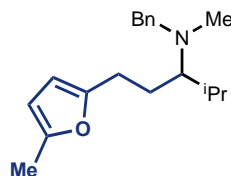

The synthesis of N-benzyl-N,2-dimethyl-6-(5-methylfuran-2-yl)hexan-3-amine was attempted according to General Procedure C using Zn (39 mg, 0.6 mmol, 3 equiv), N-methylbenzylamine hydrochloride (32 mg, 0.2 mmol, 1 equiv), 3-(5-Methyl-2-furyl)propionaldehyde (55 mg, 0.4 mmol, 2 equiv), 2-iodopropane (136  $\mu$ L, 0.8 mmol, 4 equiv) and TMSOTf (36  $\mu$ L, 0.2 mmol, 0.5 equiv) in EtOAc (1 mL). Yield of the product was determined by  $^1\text{H}$  NMR using 1,1,2,2-tetrachloroethane as internal standard indicating a 53% yield based on isopropyl peak at 1.05 ppm.

*Note: Use of other lewis acids or lewis acid loadings did not improve yields.*

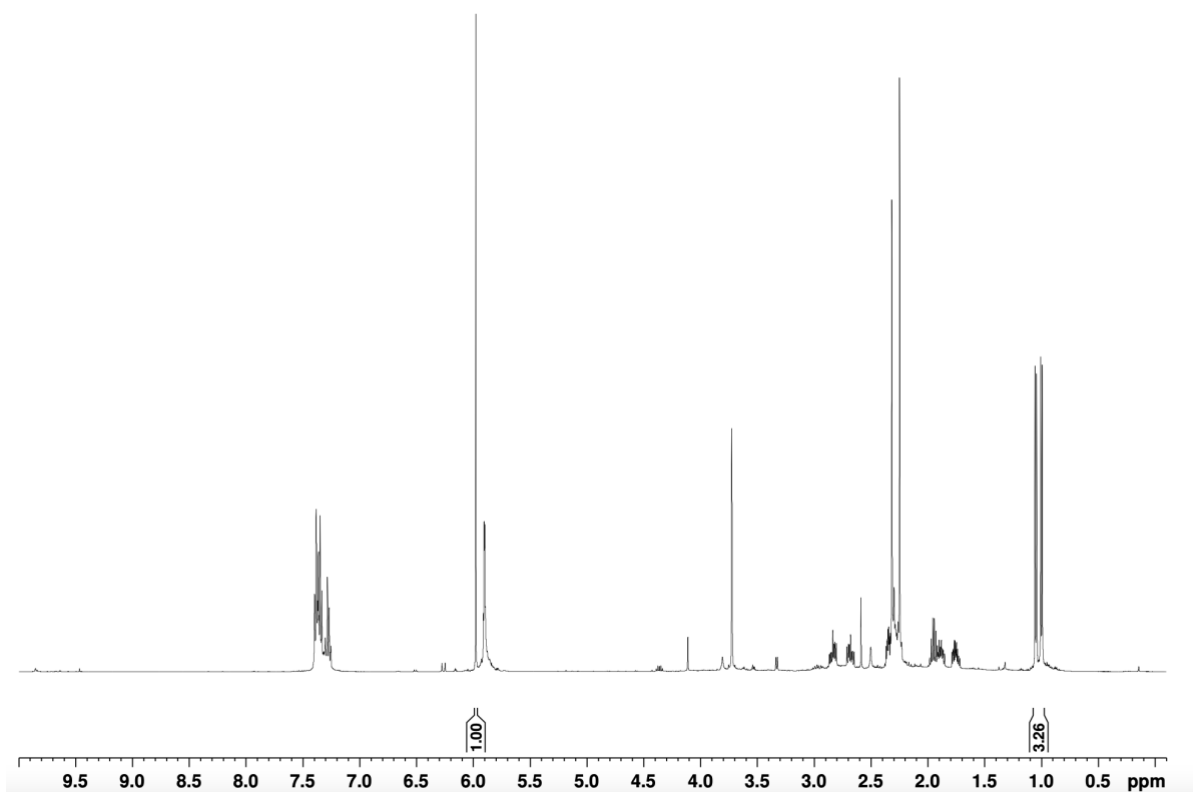

### 5.3 Alkyl halide scope

#### N-benzyl-1-cyclohexyl-N-methyl-3-phenylpropan-1-amine (10a)

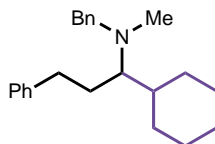

N-benzyl-1-cyclohexyl-N-methyl-3-phenylpropan-1-amine was prepared according to General Procedure **B** using Zn (52 mg, 0.8 mmol, 2 equiv), N-methylbenzylamine (52  $\mu$ L, 0.4 mmol, 1 equiv), hydrocinnamaldehyde (78  $\mu$ L, 0.6 mmol, 1.5 equiv), cyclohexyl iodide (129  $\mu$ L, 1 mmol, 2.5 equiv) and TMSOTf (144  $\mu$ L, 0.8 mmol, 2 equiv) in EtOAc (1 mL). Crude material was purified by acid-base wash according to general procedure **ABW**, yielding the product as a colourless oil (91 mg, 71%).

$^1\text{H NMR}$  (400 MHz,  $\text{CDCl}_3$ ):  $\delta$  7.46 - 7.35 (m, 6H), 7.33-7.25 (m, 4H), 3.76 (s, 2H), 2.94 - 2.85 (m, 1H), 2.78 - 2.69 (m, 1H), 2.47 - 2.70 (m, 1H), 2.30 (s, 3H), 2.06 - 1.71 (m, 7H), 1.69 - 1.59 (m, 1H), 1.42 - 1.05 (m, 5H).

$^{13}\text{C NMR}$  (101 MHz,  $\text{CDCl}_3$ ):  $\delta$  143.4, 141.1, 128.7, 125.53, 128.47, 128.3, 126.7, 125.8, 68.0, 59.3, 40.4, 37.2, 35.3, 31.9, 31.1, 30.2, 26.90, 26.87, 26.8.

**IR** (film,  $\text{cm}^{-1}$ ): 3061, 2920, 2849, 2785, 1494, 1450, 1027, 1027, 731, 696.

**HRMS**:  $m/z$  calcd for  $\text{C}_{23}\text{H}_{31}\text{N}$   $[\text{M}+\text{H}]^+$  322.2530; found 322.2545.

#### N-benzyl-N-methyl-3-phenyl-1-(tetrahydro-2H-pyran-4-yl)propan-1-amine (10b)

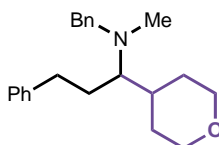

N-benzyl-N-methyl-3-phenyl-1-(tetrahydro-2H-pyran-4-yl)propan-1-amine was prepared according to General Procedure **B** using Zn (52 mg, 0.8 mmol, 2 equiv), N-methylbenzylamine (52  $\mu$ L, 0.4 mmol, 1 equiv), hydrocinnamaldehyde (78  $\mu$ L, 0.6 mmol, 1.5 equiv), 4-iodotetrahydro-2H-pyran (212 mg, 1 mmol, 2.5 equiv) and TMSOTf (144  $\mu$ L, 0.8 mmol, 2 equiv) in EtOAc (1 mL). Crude material was purified by column chromatography (0-30%  $\text{Et}_2\text{O}$  in Pet. Ether), yielding the product as a colourless oil (79 mg, 61%).

$^1\text{H NMR}$  (400 MHz,  $\text{CDCl}_3$ ):  $\delta$  7.37 - 7.30 (m, 6H), 7.29 - 7.20 (m, 4H), 4.07 - 4.00 (m, 2H), 3.74 (d,  $J = 13.6$  Hz, 1H), 3.70 (d,  $J = 13.7$  Hz, 1H), 3.45 - 3.36 (m, 2H), 2.88 - 2.78 (m, 1H), 2.74 - 2.63 (m, 1H), 2.44 - 2.36 (m, 1H), 2.25 (s, 3H), 1.96 - 1.84 (m, 2H), 1.84 - 1.60 (m, 3H), 1.50 - 1.35 (m, 2H).

$^{13}\text{C NMR}$  (101 MHz,  $\text{CDCl}_3$ ):  $\delta$  142.9, 140.7, 128.6, 128.54, 128.47, 128.3, 126.9, 125.9, 68.6, 68.2, 67.4, 59.5, 38.4, 36.8, 35.2, 31.9, 31.4, 30.0.

**IR** (film,  $\text{cm}^{-1}$ ): 3024, 2946, 2839, 1494, 1453, 1092, 1027, 734, 697.

**HRMS**:  $m/z$  calcd for  $\text{C}_{22}\text{H}_{29}\text{NO}$   $[\text{M}+\text{H}]^+$  324.2322; found 324.2325.



### Benzyl 4-(1-(benzyl(methyl)amino)-3-phenylpropyl)piperidine-1-carboxylate (10c)

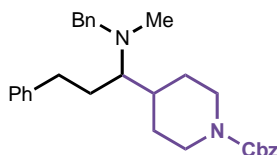

Benzyl 4-(1-(benzyl(methyl)amino)-3-phenylpropyl)piperidine-1-carboxylate (was prepared according to General Procedure **B** using Zn (52 mg, 0.8 mmol, 2 equiv), N-methylbenzylamine (52  $\mu$ L, 0.4 mmol, 1 equiv), hydrocinnamaldehyde (80  $\mu$ L, 0.6 mmol, 1.5 equiv), benzyl 4-iodopiperidine-1-carboxylate (345 mg, 1 mmol, 2.5 equiv) and TMSOTf (144  $\mu$ L, 0.8 mmol, 2 equiv) in EtOAc (1 mL). Crude material was subjected to an acid-base wash according to general procedure **ABW**, followed by column chromatography (30-70% Et<sub>2</sub>O in Pet. Ether) yielding the product as a colourless oil (119 mg, 65%). Data was in line with previous characterisation.<sup>1</sup>

### N-benzyl-1-cyclopentyl-N-methyl-3-phenylpropan-1-amine (10d)

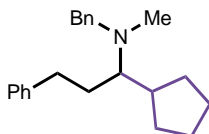

N-benzyl-1-cyclopentyl-N-methyl-3-phenylpropan-1-amine was prepared according to General Procedure **B** using Zn (52 mg, 0.8 mmol, 2 equiv), N-methylbenzylamine (52  $\mu$ L, 0.4 mmol, 1 equiv), hydrocinnamaldehyde (93  $\mu$ L, 0.7 mmol, 1.75 equiv), iodocyclopentane (139  $\mu$ L, 1.2 mmol, 3 equiv) and TMSOTf (127  $\mu$ L, 0.7 mmol, 1.75 equiv) in EtOAc (1 mL). Crude material was purified by column chromatography (0-5% EtOAc in Pet. Ether), yielding the product as a colourless oil (73 mg, 59% yield).

<sup>1</sup>H NMR (500 MHz, CDCl<sub>3</sub>):  $\delta$  7.39 – 7.35 (m, 2H), 7.34 – 7.27 (m, 4H), 7.25 – 7.16 (m, 4H), 3.74 (d, J = 13.7 Hz, 1H), 3.69 (d, J = 13.7 Hz, 1H), 2.90 (ddd, J = 13.6, 10.5, 5.1 Hz, 1H), 2.67 (ddd, J = 13.7, 10.4, 6.4 Hz, 1H), 2.43 (td, J = 8.6, 3.7 Hz, 1H), 2.23 (s, 3H), 2.05 (ddt, J = 17.5, 9.8, 7.6 Hz, 1H), 1.93 – 1.80 (m, 2H), 1.79 – 1.57 (m, 4H), 1.56-1.46 (m, 2H), 1.38 – 1.24 (m, 1H), 1.17 (ddt, J = 12.1, 9.7, 8.1 Hz, 1H).

<sup>13</sup>C NMR (126 MHz, CDCl<sub>3</sub>):  $\delta$  143.4, 141.2, 128.5, 128.5, 128.3, 128.1, 126.6, 125.6, 67.9, 59.1, 43.2, 36.8, 34.5, 32.5, 32.1, 30.8, 25.3, 25.2.

IR (film, cm<sup>-1</sup>): 2945, 2863, 2784, 1602, 1493, 1451, 1353, 1027, 731, 696, 619.

HRMS: m/z calculated for C<sub>22</sub>H<sub>30</sub>N [M+H]<sup>+</sup> 308.2378; found 308.2373.

### N-benzyl-N-methyl-4-methyl-1-phenylhexan-3-amine (10e)

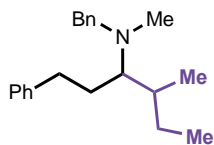

N-benzyl-N-methyl-4-methyl-1-phenylhexan-3-amine was prepared according to General Procedure A using Zn (52 mg, 0.8 mmol, 2 equiv), N-methylbenzylamine hydrochloride (63 mg, 0.4 mmol, 1 equiv), hydrocinnamaldehyde (78  $\mu$ L, 0.6 mmol, 1.5 equiv), 2-iodobutane (139  $\mu$ L, 1.2 mmol, 3 equiv) and TMSOTf (36  $\mu$ L, 0.2 mmol, 0.5 equiv) in EtOAc (1 mL). Crude material was purified by column chromatography (0-2% EtOAc in Pet. Ether), yielding the product as a colourless oil (59 mg, 1:1 d.r., 58%).

*Diastereomers not distinguishable by  $^1\text{H}$  NMR.*

$^1\text{H}$  NMR (500 MHz,  $\text{CDCl}_3$ ):  $\delta$  7.41-7.30 (m, 6H), 7.29-7.21 (m, 4H), 3.77-3.64 (m, 2H), 2.94 - 2.79 (m, 1H), 2.73 - 2.65 (m, 1H), 2.51 - 2.44 (m, 1H), 2.26-2.23 (m, 3H), 1.96-1.85 (m, 1H), 1.78 - 1.51 (m, 3H), 1.28-1.13 (m, 1H), 1.03 - 0.87 (m, 6H).

$^{13}\text{C}$  NMR (126 MHz,  $\text{CDCl}_3$ ):  $\delta$  143.3, 143.2, 141.0, 140.9, 128.6, 128.5, 128.44, 128.40, 128.4, 128.3, 128.2, 128.1, 126.62, 126.59, 125.69, 125.65, 67.1, 66.5, 59.5, 58.9, 37.4, 37.23, 37.19, 35.42, 35.1, 34.9, 30.0, 29.8, 27.9, 26.6, 17.3, 16.7, 11.9, 11.7.

IR (film,  $\text{cm}^{-1}$ ): 2958, 2930, 1494, 1452, 1027, 732, 697.

HRMS: m/z calcd for  $\text{C}_{21}\text{H}_{30}\text{N}$   $[\text{M}+\text{H}]^+$  296.2373; found 296.2381.

## N-Benzyl-1-(4-iodophenyl)-N-methyl-4-phenylbutan-2-amine (10f)

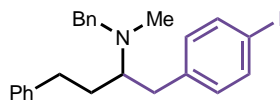

An oven dried vial (Biotage Microwave Process Vial (10 mL), equipped with gas-tight pierceable caps) was charged with a stirring bar was sealed, evacuated and backfilled with N<sub>2</sub>. To this was added 1.0 ml dry EtOAc, followed by N-methylbenzylamine (52 μL, 0.4 mmol, 1 equiv) and hydrocinnamaldehyde (78 μL, 0.6 mmol, 1.5 equiv). TMSOTf (72 μL, 0.4 mmol, 1 equiv) was added dropwise. The mixture was stirred for 15 mins. The cap was removed. Zinc (20 mg, 0.3 mmol, 3 equiv) and 4-iodobenzyl bromide (297 mg, 1 mmol, 2.5 equiv) were added in one portion. The microwave vial was sealed, put under vacuum and refilled with N<sub>2</sub>. The mixture was stirred overnight. The crude mixture was worked up according to general procedure **A**, then subjected to an acid-base wash according to general procedure **ABW**, followed by column chromatography (10-20% Et<sub>2</sub>O in Pet. Ether), yielding the product as a colourless oil (129 mg, 71%).

**<sup>1</sup>H NMR** (400 MHz, CDCl<sub>3</sub>): δ 7.62 (d, J = 7.9 Hz, 2H), 7.39 – 7.27 (m, 7H), 7.22 (t, J = 7.3 Hz, 1H), 7.17 (d, J = 7.5 Hz, 2H), 6.91 (d, J = 7.8 Hz, 2H), 3.77 (d, J = 13.4 Hz, 1H), 3.64 (d, J = 13.5 Hz, 1H), 2.99 (dd, J = 13.3, 5.3 Hz, 1H), 2.94 – 2.79 (m, 2H), 2.59 (ddd, J = 13.9, 10.1, 6.4 Hz, 1H), 2.48 (dd, J = 13.3, 8.5 Hz, 1H), 2.33 (s, 3H), 1.94 – 1.83 (m, 1H), 1.73 – 1.62 (m, 1H).

**<sup>13</sup>C NMR** (101 MHz, CDCl<sub>3</sub>): δ 142.6, 140.6, 140.1, 137.3, 131.4, 128.6, 128.4, 128.34, 128.26, 126.9, 125.7, 90.8, 63.9, 58.2, 36.3, 34.8, 33.3, 32.4.

**IR** (film, cm<sup>-1</sup>): 3023, 2931, 2786, 1483, 1452, 1005, 731, 695.

**HRMS**: m/z calcd for C<sub>24</sub>H<sub>27</sub>IN [M+H]<sup>+</sup> 456.1183; found 456.1181.

### Methyl 3-(2-(benzyl(methyl)amino)-4-phenylbutyl)benzoate (10g)

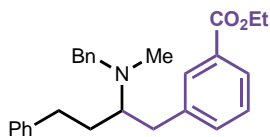

An oven dried vial (Biotage Microwave Process Vial (10 mL), equipped with gas-tight pierceable caps) was charged with a stirring bar was sealed, evacuated and backfilled with N<sub>2</sub>. To this was added 1.0 ml dry EtOAc, followed by N-methylbenzylamine (52  $\mu$ L, 0.4 mmol, 1 equiv) and hydrocinnamaldehyde (78  $\mu$ L, 0.6 mmol, 1.5 equiv). Then, TMSOTf (72  $\mu$ L, 0.4 mmol, 1 equiv) was added dropwise. The mixture was stirred for 15 mins. The cap was removed. Zinc (20 mg, 0.3 mmol, 3 equiv) and methyl 3-(bromomethyl)benzoate (229 mg, 1 mmol, 2.5 equiv) were added in one portion. The microwave vial was sealed, put under vacuum and refilled with N<sub>2</sub>. The mixture was stirred overnight. The crude mixture was worked up according to general procedure **A**, followed by column chromatography (6-20% Et<sub>2</sub>O in Pet. Ether) but the product was still contaminated with impurities. The crude mixture was subjected to an acid-base wash according to general procedure **ABW**, yielding the product as a colourless oil (97 mg, 63%).

**<sup>1</sup>H NMR** (400 MHz, CDCl<sub>3</sub>):  $\delta$  7.91 (dd, J = 7.3, 1.7 Hz, 1H), 7.87 – 7.82 (m, 1H), 7.39 – 7.09 (m, 12H), 3.94 (s, 3H), 3.76 (d, J = 13.5 Hz, 1H), 3.64 (d, J = 13.5 Hz, 1H), 3.07 (dd, J = 13.6, 5.3 Hz, 1H), 2.87 (ddd, J = 15.4, 10.2, 5.0 Hz, 2H), 2.64 – 2.49 (m, 2H), 2.32 (s, 3H), 1.95 – 1.79 (m, 1H), 1.64 (ddt, J = 15.1, 11.0, 5.7 Hz, 1H).

**<sup>13</sup>C NMR** (101 MHz, CDCl<sub>3</sub>):  $\delta$  167.3, 142.6, 141.3, 140.1, 133.9, 130.3, 130.1, 128.6, 128.4, 128.3, 128.2, 127.1, 126.8, 125.7, 64.1, 58.2, 52.1, 36.3, 35.1, 33.2, 32.3.

**IR** (film, cm<sup>-1</sup>): 3025, 2945, 2865, 2788, 1719, 1452, 1279, 1201, 1106, 747, 697.

**HRMS**: m/z calcd for C<sub>26</sub>H<sub>30</sub>NO<sub>2</sub> [M+H]<sup>+</sup> 388.2272; found 388.2266.

### N-benzyl-N-methyl-1,4-diphenylbutan-2-amine (10h)

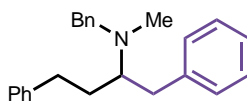

N-benzyl-N-methyl-1,4-diphenylbutan-2-amine was prepared according to General Procedure **A** using Zn (52 mg, 0.8 mmol, 2 equiv), N-methylbenzylamine hydrochloride (63 mg, 0.4 mmol, 1 equiv), hydrocinnamaldehyde (80  $\mu$ L, 0.6 mmol, 1.5 equiv), benzyl chloride (138  $\mu$ L, 1.2 mmol, 3 equiv) and TMSOTf (36  $\mu$ L, 0.2 mmol, 0.5 equiv) in EtOAc (1 mL). The crude product was purified by column chromatography (0-40% Et<sub>2</sub>O in Pet. Ether (with 3% NEt<sub>3</sub>)), yielding the product as a colourless oil (81 mg, 62%).

**<sup>1</sup>H NMR** (400 MHz, CDCl<sub>3</sub>):  $\delta$  7.34 – 7.12 (m, 15H), 3.77 (d, J = 13.6 Hz, 1H), 3.63 (d, J = 13.5 Hz, 1H), 3.06 (dd, J = 8.4, 5.0 Hz, 1H), 2.92 – 2.84 (m, 2H), 2.55 – 2.47 (m, 2H), 2.31 (s, 3H), 1.88 – 1.81 (m, 1H), 1.72 – 1.64 (m, 1H).

**<sup>13</sup>C NMR** (101 MHz, CDCl<sub>3</sub>):  $\delta$  142.9, 140.9, 140.3, 129.3, 128.6, 128.4, 128.2 (d, J = 5.4 Hz), 126.8, 125.7, 125.6, 64.43, 58.1, 36.4, 35.1, 33.2, 32.6.

**IR** (film, cm<sup>-1</sup>): 3028, 2917, 2851, 2780, 1594, 1478, 1437, 1354, 1073, 912, 730, 693, 482.

**HRMS**: m/z calcd for C<sub>24</sub>H<sub>27</sub>N [M+H]<sup>+</sup> 330.2216; found 330.2217.

### N-benzyl-1-(4-chlorophenyl)-N-methyl-4-phenylbutan-2-amine (10i)

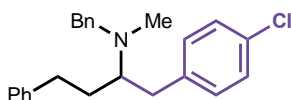

N-benzyl-1-(4-chlorophenyl)-N-methyl-4-phenylbutan-2-amine was prepared according to General Procedure **A** using Zn (52 mg, 0.8 mmol, 2 equiv), N-methylbenzylamine hydrochloride (63 mg, 0.4 mmol, 1 equiv), hydrocinnamaldehyde (80  $\mu$ L, 0.6 mmol, 1.5 equiv), 4-chlorobenzyl chloride (138  $\mu$ L, 1.2 mmol, 3 equiv) and TMSOTf (36  $\mu$ L, 0.2 mmol, 0.5 equiv) in EtOAc (1 mL). The crude product was filtered through an SCX-column (eluting with 5N  $\text{NH}_3$  in MeOH) then purified by column chromatography (0-15% EtOAc in Pet. Ether), yielding the product as a colourless oil (102 mg, 70% yield).

**$^1\text{H NMR}$**  (500 MHz,  $\text{CDCl}_3$ )  $\delta$  7.35 – 7.22 (m, 9H), 7.22 – 7.17 (m, 1H), 7.14 – 7.11 (m, 2H), 7.08 – 7.03 (m, 2H), 3.74 (d,  $J = 13.5$  Hz, 1H), 3.61 (d,  $J = 13.4$  Hz, 1H), 2.98 (dd,  $J = 13.3, 5.3$  Hz, 1H), 2.91 – 2.76 (m, 2H), 2.55 (ddd,  $J = 13.8, 10.2, 6.3$  Hz, 1H), 2.47 (dd,  $J = 13.3, 8.6$  Hz, 1H), 2.29 (s, 3H), 1.85 (dddd,  $J = 13.9, 10.2, 8.7, 5.2$  Hz, 1H), 1.63 (dddd,  $J = 13.9, 10.2, 6.3, 5.1$  Hz, 1H).

**$^{13}\text{C NMR}$**  (126 MHz,  $\text{CDCl}_3$ )  $\delta$  142.7, 140.1, 139.4, 131.4, 130.6, 128.6, 128.4, 128.3, 128.3, 128.2, 126.8, 125.7, 63.99, 58.1, 36.3, 34.6, 33.2, 32.3.

**IR** (film,  $\text{cm}^{-1}$ ): 3024, 2931, 2855, 1787, 1491, 1452, 1089, 1014, 732, 696

**HRMS**:  $m/z$  calculated for  $\text{C}_{24}\text{H}_{27}\text{ClN}$   $[\text{M}+\text{H}]^+$  364.1832; found 364.1828.

### N-benzyl-N-methyl-1,1,4-triphenylbutan-2-amine (10j)

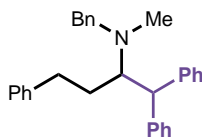

N-benzyl-N-methyl-1,1,4-triphenylbutan-2-amine was prepared according to General Procedure A using Zn (52 mg, 0.8 mmol, 2 equiv), N-methylbenzylamine hydrochloride (63 mg, 0.4 mmol, 1 equiv), hydrocinnamaldehyde (80  $\mu$ L, 0.6 mmol, 1.5 equiv), bromodiphenylmethane (297 mg, 1.2 mmol, 3 equiv) and TMSOTf (36  $\mu$ L, 0.2 mmol, 0.5 equiv) in EtOAc (1 mL). The crude mixture was filtered through an SCX-column (eluting with 5N NH<sub>3</sub> in MeOH) then purified by column chromatography (0-100% (80% Et<sub>2</sub>O: 10% Pet. Ether : 3% Et<sub>3</sub>N) in Pet. Ether) to afford the product as a colourless oil (68 mg, 42%).

**<sup>1</sup>H NMR** (500 MHz, CDCl<sub>3</sub>)  $\delta$  7.39 (dd, J = 7.7, 2.5 Hz, 2H), 7.34 – 7.25 (m, 8H), 7.25 – 7.17 (m, 6H), 7.06 (dd, J = 7.4, 2.8 Hz, 2H), 6.95 (dt, J = 7.2, 2.5 Hz, 2H), 4.10 (dd, J = 11.0, 2.6 Hz, 1H), 3.75 (dd, J = 13.8, 2.6 Hz, 1H), 3.60 (ddt, J = 10.6, 7.0, 3.3 Hz, 1H), 3.50 (dd, J = 13.8, 2.5 Hz, 1H), 2.66 (ddt, J = 16.1, 8.3, 3.9 Hz, 1H), 2.47 – 2.32 (m, 1H), 2.19 (d, J = 2.6 Hz, 3H), 2.02 – 1.86 (m, 1H), 1.78 – 1.62 (m, 1H).

**<sup>13</sup>C NMR** (126 MHz, CDCl<sub>3</sub>)  $\delta$  144.5, 143.9, 142.6, 140.6, 128.6, 128.6, 128.4, 128.4, 128.3, 128.3, 128.2, 128.0, 126.5, 126.3, 126.0, 125.7, 66.0, 59.0, 56.9, 35.9, 34.7, 31.9.

**IR** (film, cm<sup>-1</sup>): 3023, 2924, 2780, 1599, 1492, 1450, 1353, 1027, 734, 695.

**HRMS**: m/z calculated for C<sub>30</sub>H<sub>32</sub>N [M+H]<sup>+</sup> 406.2535; found 406.2542.

### Ethyl 1-(1-(benzyl(methyl)amino)-3-phenylpropyl)cyclobutane-1-carboxylate (10k)

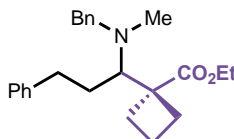

Ethyl 1-(1-(benzyl(methyl)amino)-3-phenylpropyl)cyclobutane-1-carboxylate was prepared according to the general procedure B using zinc (52 mg, 0.8 mmol, 2 equiv), N-methylbenzylamine (52  $\mu$ L, 0.4 mmol, 1 equiv), hydrocinnamaldehyde (79  $\mu$ L, 0.6 mmol, 1.5 equiv), cyclobutyl bromide ethyl ester (248  $\mu$ L, 1.2 mmol, 3 equiv) and TMSOTf (108  $\mu$ L, 0.6 mmol, 1.5 equiv) in EtOAc (1 mL). Crude material was purified by column chromatography (0-15 (10% Et<sub>2</sub>O:90% Pet. Ether: NEt<sub>3</sub> 3%) in Pet. Ether) to afford the product as a colorless oil (60 mg, 41%).

**<sup>1</sup>H NMR** (400 MHz, CDCl<sub>3</sub>)  $\delta$  7.41 – 7.20 (m, 10H), 4.37 – 4.11 (m, 2H), 3.87 – 3.74 (m, 2H), 3.12 (dd, J = 9.2, 3.4 Hz, 1H), 2.97 (ddd, J = 13.5, 10.9, 5.1 Hz, 1H), 2.76 (ddd, J = 13.5, 10.4, 6.2 Hz, 1H), 2.55 – 2.38 (m, 2H), 2.29 – 2.13 (m, 6H), 2.03 – 1.89 (m, 2H), 1.82-1.73 (m, 1H), 1.30 (t, J = 7.1 Hz, 3H).

**<sup>13</sup>C NMR** (101 MHz, CDCl<sub>3</sub>)  $\delta$  177.4, 142.6, 140.5, 128.5, 128.39, 128.35, 128.1, 126.7, 125.9, 68.6, 60.3, 59.8, 54.1, 37.4, 35.4, 30.5, 28.5, 28.3, 16.7, 14.2.

**IR** (film, cm<sup>-1</sup>): 2976, 2865, 1718, 1452, 1279, 1198, 1105, 1026, 732, 696.

**HRMS**: m/z calcd for C<sub>24</sub>H<sub>32</sub>NO<sub>2</sub> [M+H]<sup>+</sup> 366.2428; found 366.2434.

### Ethyl 3-(benzyl(methyl)amino)-2,2-difluoro-5-phenylpentanoate (101)

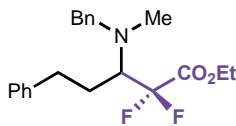

Ethyl 3-(benzyl(methyl)amino)-2,2-difluoro-5-phenylpentanoate was prepared according to the general procedure B using zinc (52 mg, 0.8 mmol, 2 equiv), N-methylbenzylamine (52  $\mu$ L, 0.4 mmol 1 equiv), hydrocinnamaldehyde (79  $\mu$ L, 0.6 mmol, 1.5 equiv), ethyl 2-bromo-2,2-difluoroacetate (244  $\mu$ L, 1.2 mmol, 3 equiv) and TMSOTf (108  $\mu$ L, 0.6 mmol, 1.5 equiv) in EtOAc (1 mL). Crude material was purified by column chromatography (0-15% (10% Et<sub>2</sub>O:90% Pet. Ether: NEt<sub>3</sub> 3%) in Pet. Ether) to afford the product as a colorless oil (59 mg, 40%).

**<sup>1</sup>H NMR** (400 MHz, CDCl<sub>3</sub>)  $\delta$  7.39 – 7.22 (m, 10H), 4.45 – 4.25 (m, 2H), 3.87 (d, J = 13.4 Hz, 1H), 3.73 (d, J = 13.5 Hz, 1H), 3.49 – 3.32 (m, 1H), 2.94 – 2.74 (m, 2H), 2.33 (s, 3H), 2.18 – 1.98 (m, 2H), 1.32 (t, J = 7.1 Hz, 3H).

**<sup>13</sup>C NMR** (126 MHz, CDCl<sub>3</sub>)  $\delta$  164.6 (dd, J = 33.5, 30.7 Hz), 141.5, 139.2, 128.6, 128.5, 128.4, 128.2, 127.1, 126.2, 118.1 (dd, J = 260.9, 256.9 Hz), 64.1 (dd, J = 25.8, 21.1 Hz), 62.5, 59.7, 37.2, 33.4, 25.2, 14.0.

**<sup>19</sup>F NMR** (376 MHz, CDCl<sub>3</sub>)  $\delta$  -103.8 (d, J = 255.9 Hz), -118.8 (d, J = 255.9 Hz).

**IR** (film, cm<sup>-1</sup>): 3061, 2955, 2864, 1758, 1678, 1495, 1063, 748, 698.

**HRMS**: m/z calcd for C<sub>21</sub>H<sub>26</sub>F<sub>2</sub>NO<sub>2</sub> [M+H]<sup>+</sup> 362.1927; found 362.1919.

## N-benzyl-N-methyl-4-phenylbutan-2-amine (10m)

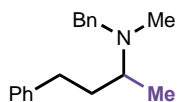

The synthesis of N-benzyl-N-methyl-4-phenylbutan-2-amine was attempted according to General Procedure **B** using Zn (52 mg, 0.8 mmol, 2 equiv), N-methylbenzylamine (52  $\mu$ L, 0.4 mmol, 1 equiv), hydrocinnamaldehyde (106  $\mu$ L, 0.8 mmol, 2 equiv), 2-bromopropane (112  $\mu$ L, 1.2 mmol, 3 equiv) and TMSOTf (36  $\mu$ L, 0.2 mmol, 0.5 equiv) in EtOAc (1 mL). Yield of the product was determined by  $^1\text{H}$  NMR using 1,1,2,2-tetrachloroethane as internal standard indicating a 9% yield based on alpha-methyl peak at 1.10 ppm.

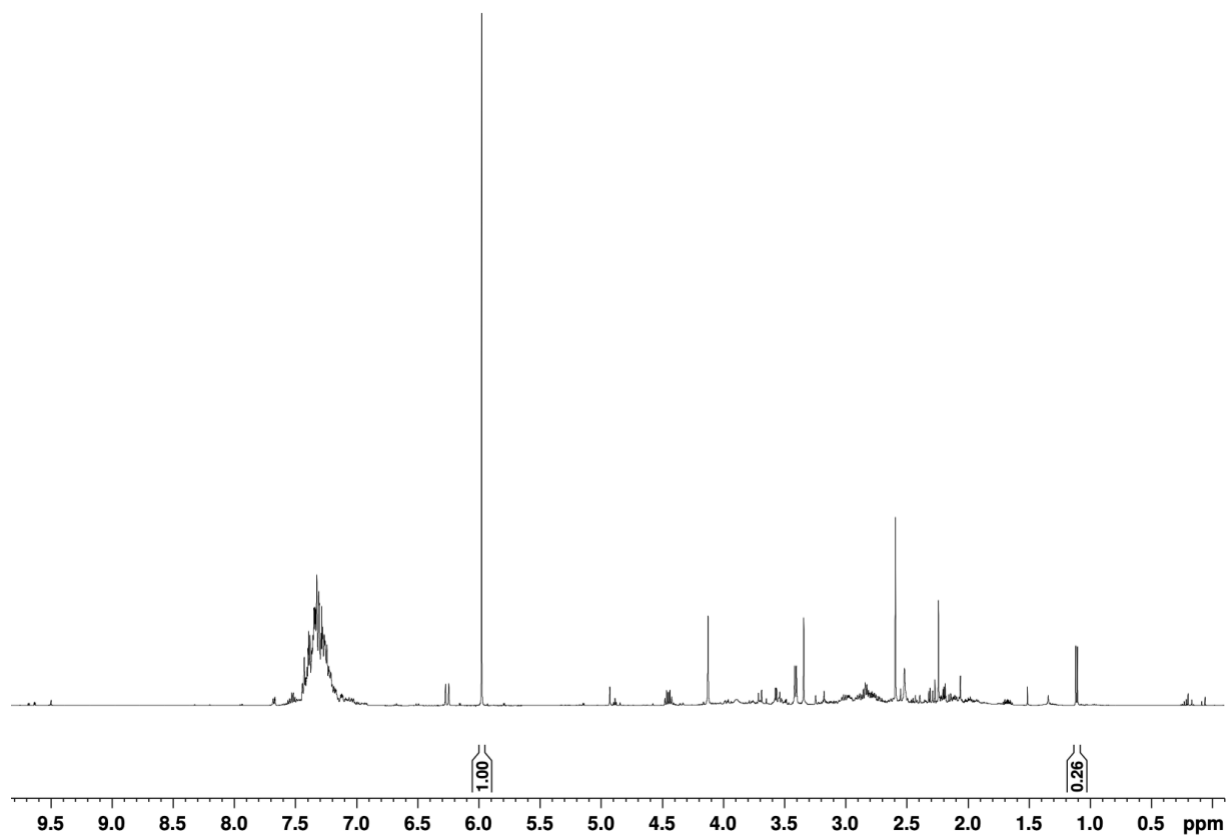



## N-Benzyl-N-methyl-1-phenylhexan-3-amine (10n)

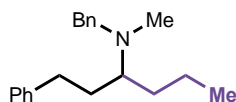

The synthesis of N-Benzyl-N-methyl-1-phenylhexan-3-amine was attempted according to General Procedure **B** using Zn (52 mg, 0.8 mmol, 2 equiv), N-methylbenzylamine (52  $\mu$ L, 0.4 mmol, 1 equiv), hydrocinnamaldehyde (106 mL, 0.8 mmol, 2 equiv), 1-iodopropane (117  $\mu$ L, 1.2 mmol, 3 equiv) and TMSOTf (144  $\mu$ L, 0.8 mmol, 2 equiv) in EtOAc (1 mL). Yield of the product was determined by  $^1\text{H}$  NMR using 1,1,2,2-tetrachloroethane as internal standard indicating a 23% yield based on the alpha proton peak at 3.70 ppm.

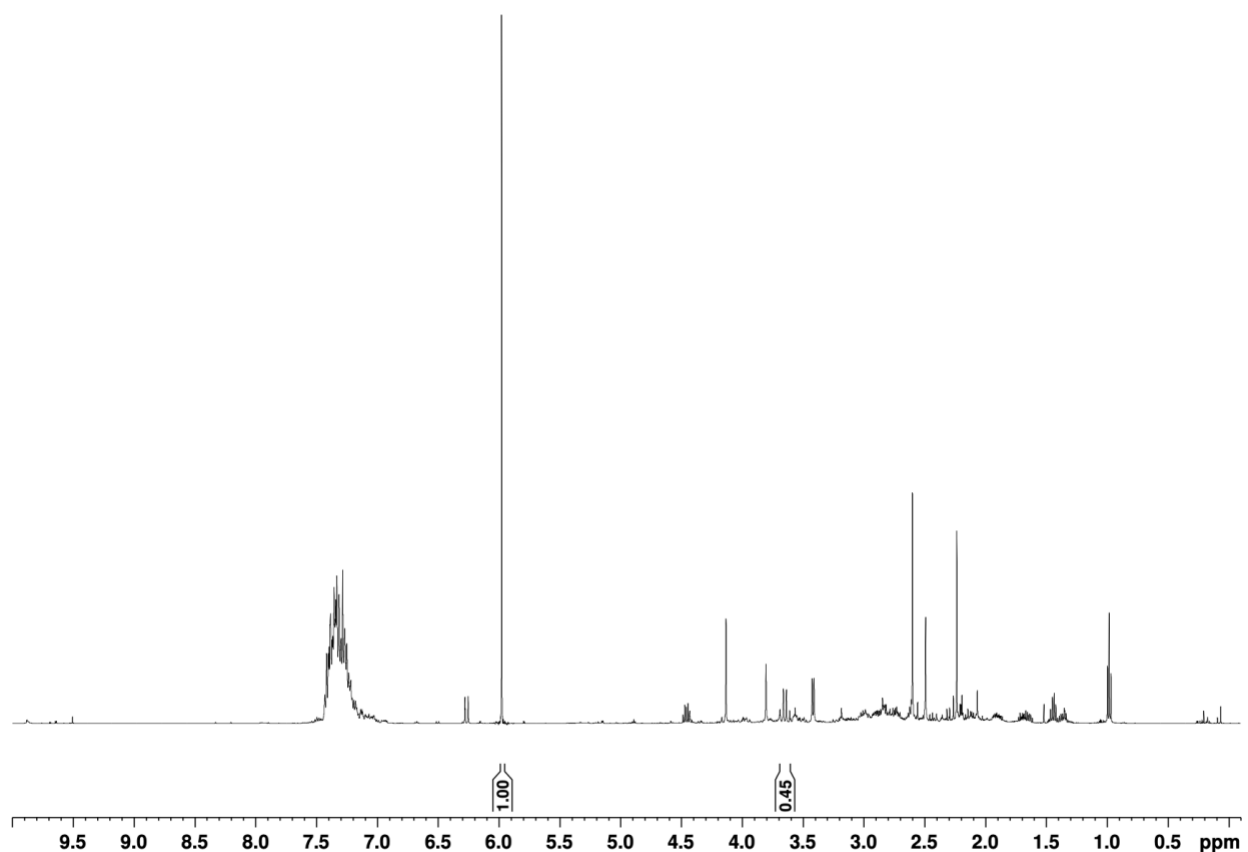

## N-benzyl-N,4,4-trimethyl-1-phenylpentan-3-amine (10o)

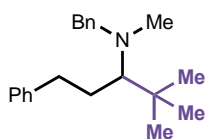

The synthesis of N-benzyl-N,4,4-trimethyl-1-phenylpentan-3-amine was attempted according to General Procedure **B** using Zn (52 mg, 0.8 mmol, 2 equiv), N-methylbenzylamine (52  $\mu$ L, 0.4 mmol, 1 equiv), hydrocinnamaldehyde (106  $\mu$ L, 0.8 mmol, 2 equiv), tertbutyliodide (143  $\mu$ L, 1.2 mmol, 3 equiv) and TMSOTf (108  $\mu$ L, 0.6 mmol, 1.5 equiv) in EtOAc (1 mL). Yield of the product was determined by  $^1\text{H}$  NMR using 1,1,2,2-tetrachloroethane as internal standard indicating a 35% yield based on the diastereotopic benzyl proton peak at 3.95 ppm.

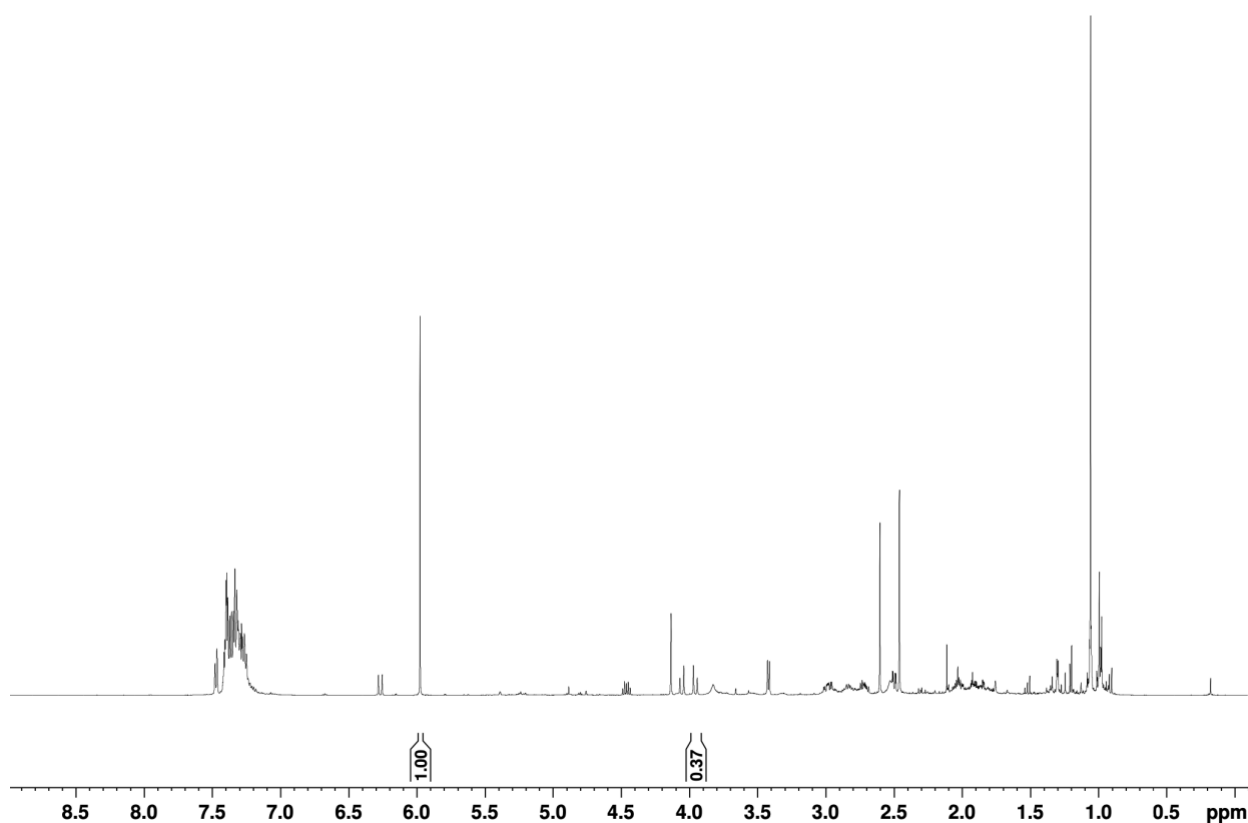

### 3-(benzyl(methyl)amino)-N,N-dimethyl-5-phenylpentanamide (10p)

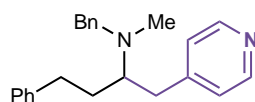

The synthesis of 3-(benzyl(methyl)amino)-N,N-dimethyl-5-phenylpentanamide was attempted according to General Procedure **B** using Zn (52 mg, 0.8 mmol, 2 equiv), N-methylbenzylamine (52  $\mu$ L, 0.4 mmol, 1 equiv), hydrocinnamaldehyde (106  $\mu$ L, 0.6 mmol, 1.5 equiv), 4-(Bromomethyl)-pyridine hydrobromide (304 mg, 1.2 mmol, 3 equiv) and TMSOTf (36  $\mu$ L, 0.2 mmol, 0.5 equiv) in EtOAc (1 mL). Yield of the product was determined by  $^1\text{H}$  NMR using 1,1,2,2-tetrachloroethane as internal standard indicating a 26% yield based on the diastereotopic benzyl proton peak at 3.74 ppm.

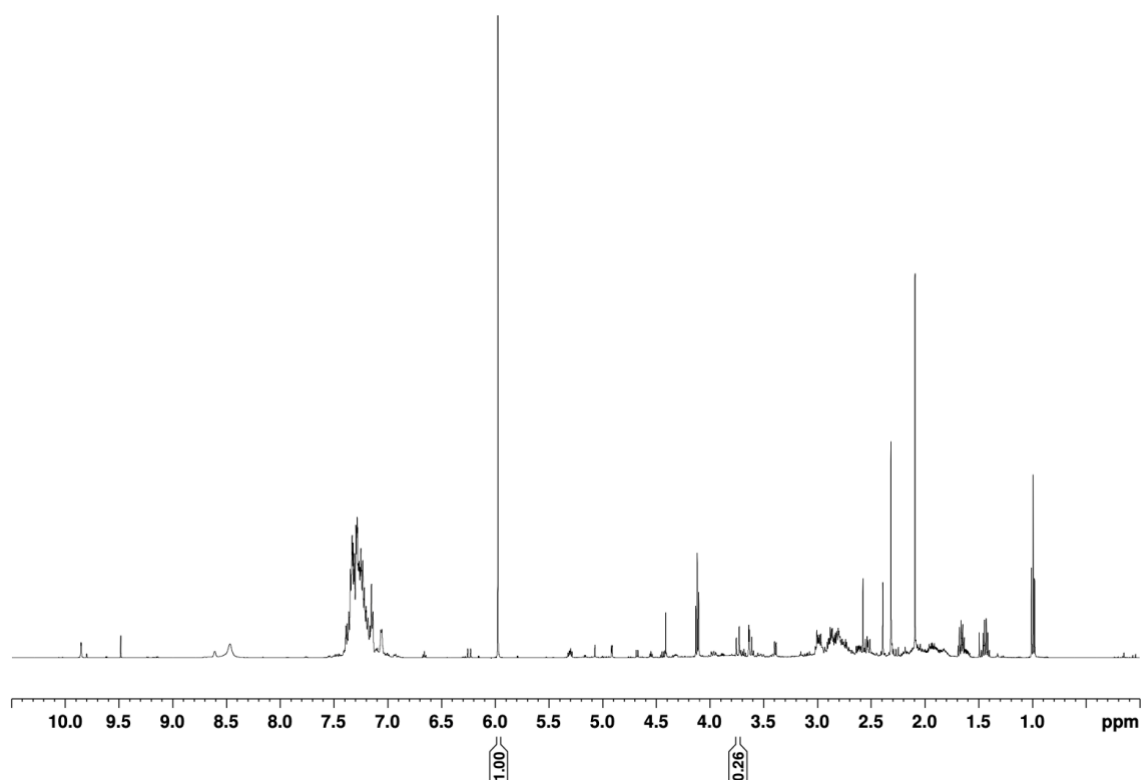

## 6. High-throughput experimentation (HTE)

### 6.1 HTE general experimental

Microscale reactions were performed in Axygen 384-well, nonsterile, clear V-bottom 120  $\mu\text{L}$ , polypropylene deep well non-treated plates (catalogue number: AXY-P-384-120SQ-C). Liquid dosing for was performed using Integra™ single channel VIAFLO II electronic pipettes (300 and 12.5  $\mu\text{L}$ , Cat. No. 4013 and 4011) and Integra™ 8-channel VIAFLO electronic pipettes (125  $\mu\text{L}$ , Cat. No. 4622) inside a Bel-Art™ SP Scienceware™ sidENTRY™ Clamping Ring Glove Box (Fischersci, Cat. No. 15641814) under a  $\text{N}_2$  atmosphere. Liquid plate transfers were performed using an Integra VIAFLO 96 electronic pipette (Cat. No. 6001) using a 5-125  $\mu\text{L}$  96 pipette head (Cat. No. 6102). Reaction shaking was performed on a Heidolph UK Vibramax 100 (Cat. No. 544-21200-00). Centrifugation and centrifugal evaporation were performed using a SP Genevac EZ-2 Elite. For filtration receiver plates, Greiner Masterblock 96-well 500  $\mu\text{L}$ , non-sterile, v-bottom polypropylene plates (Cat. No. 786201) were used. For microplate filtering, Pall Acroprep Advance 96-well 1mL filter plates (polypropylene, 1 $\mu\text{m}$  glass fibre, short tip, Cat. No. 8131) were used.

MP-isocyanate resin was purchased from Biotage, sulfonyl hydrazine resin was purchased from Sigma Aldrich and tris(aminoethylamine) polymer supported resin was purchased from Aldrich. All other resins were purchased from Sigma Aldrich or Fluka. All resins were washed with EtOAc before use. Amberlite IRA-96 was ground using a pestle and mortar into a fine powder then washed and stored under nitrogen to prevent  $\text{CO}_2$  adsorption. Stock solutions were prepared in Supleco 4 mL, screw top glass vials (Sigma Aldrich, Cat. No. 854190).

Custom Nanonest reactors were built using commercial Analytical Sales NanoNest reactors (Cat. No. 1626100) with a plastic plate border gasket (Cat. No. 1626010) and an acrylic riser (Cat. No. 162611) with two silicone matt bottom inserts (Cat. No. 1626004) as shown in General Procedure **D**.

## 6.2 Solvent screening

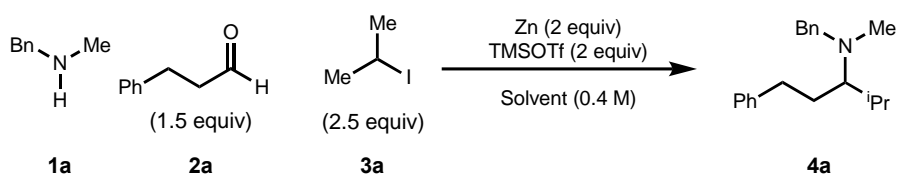

To a 4 mL vial, zinc powder (26 mg, 0.40 mmol, 2 equiv) was added. The vial was sealed, evacuated, and backfilled with N<sub>2</sub>. To the vial, *n*BuOAc (500 μL) was added, followed by *N*-methylbenzylamine (25.8 μL, 0.2 mmol, 1 equiv), hydrocinamaldehyde (39.9 μL, 0.3 mmol, 1.5 equiv) and isopropyl iodide (49.9 μL, 0.5 mmol, 2.5 equiv). The mixture was stirred for 1 min then TMSOTf (72.8 μL, 0.4 mmol, 2 equiv) was added. The reaction mixtures were stirred at room temperature for 16 h, then reaction mixture was loaded onto a plug of vacuum-packed resin. After the desired reaction time had passed, the solution was filtered under vacuum and the resin washed with EtOAc (800 μL). The resulting solution was concentrated *in vacuo* to yield the crude reaction mixture.

| Solvent             | Yield / % |
|---------------------|-----------|
| EtOAc               | 82        |
| iPrOAc              | 84        |
| EtOiPr              | 67        |
| DMSO                | 39        |
| γ-Valerolactone     | 13        |
| δ-Valerolactone     | 10        |
| ε-valerolactone     | 24        |
| Cyrene              | 57        |
| Methylbutyrate      | 68        |
| Propylene carbonate | 41        |
| Isobutanitrile      | 52        |
| <i>n</i> PrOAc      | 86        |
| <i>n</i> BuOAc      | 87        |
| Diethyl carbonate   | 81        |
| Ethyl propionate    | 32        |
| Methyl benzoate     | 86        |

## 6.3 Zinc scavenging optimization

### 6.3.1 Identification of need for zinc scavenging

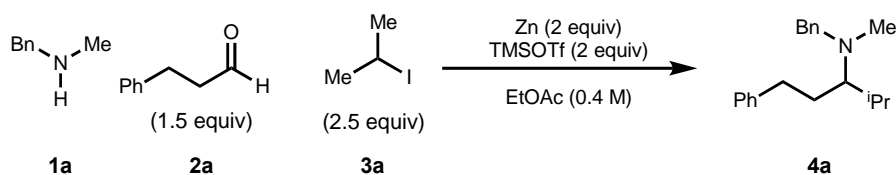

*Two samples were prepared according to the general procedure below:*

An oven dried vial (Biotage Microwave Process Vial (10 mL), equipped with gas-tight pierceable caps) was charged with a stirring bar, and Zn dust (52 mg, 0.4 mmol, 2 equiv). The vial was sealed, evacuated and backfilled with N<sub>2</sub>. To this was added EtOAc (1 mL), followed by N-methylbenzylamine (26  $\mu$ L, 0.2 mmol, 1.0 equiv), hydrocinnamaldehyde (78  $\mu$ L, 0.4 mmol, 1.5 equiv) and 2-iodopropane (50  $\mu$ L, 0.5 mmol, 2.5 equiv). The reaction mixture was stirred for 10s, followed by the addition of TMSOTf (72  $\mu$ L, 0.4 mmol, 2 equiv). The reaction mixture was stirred for 16 hours.

**Sample A** – The vial was uncapped and transferred to a 50 mL rbf. Dichloromethane (approx. 20 mL) was used to rinse the vial. The solvent was removed *in vacuo*. The resulting crude was dissolved in CDCl<sub>3</sub>, and the mixture analysed by <sup>1</sup>H NMR using 1,1,2,2-tetrachloroethane as internal standard.

**Sample B**- The crude mixture was worked up according to General procedure **B**. The resulting crude was dissolved in CDCl<sub>3</sub>, and the mixture analysed by <sup>1</sup>H NMR using 1,1,2,2-tetrachloroethane as internal standard.

**Sample A: unquenched reaction mixture  $^1\text{H}$  NMR**

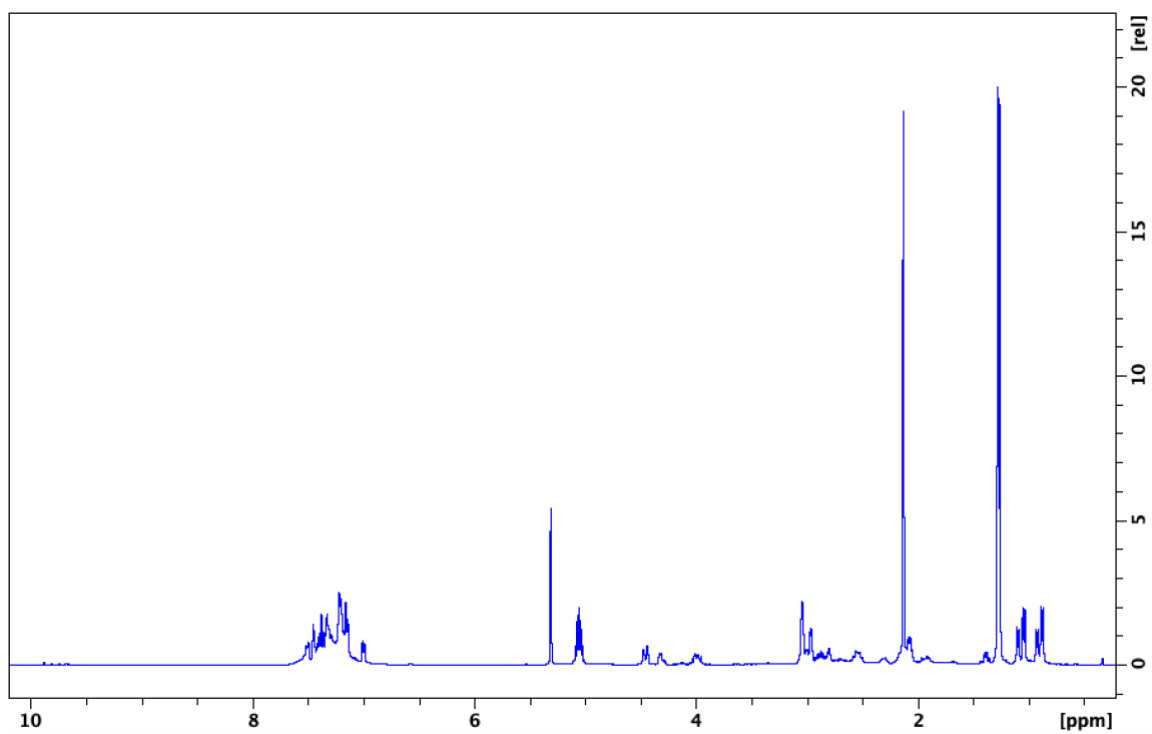

**Sample B: quenched reaction mixture  $^1\text{H}$  NMR**

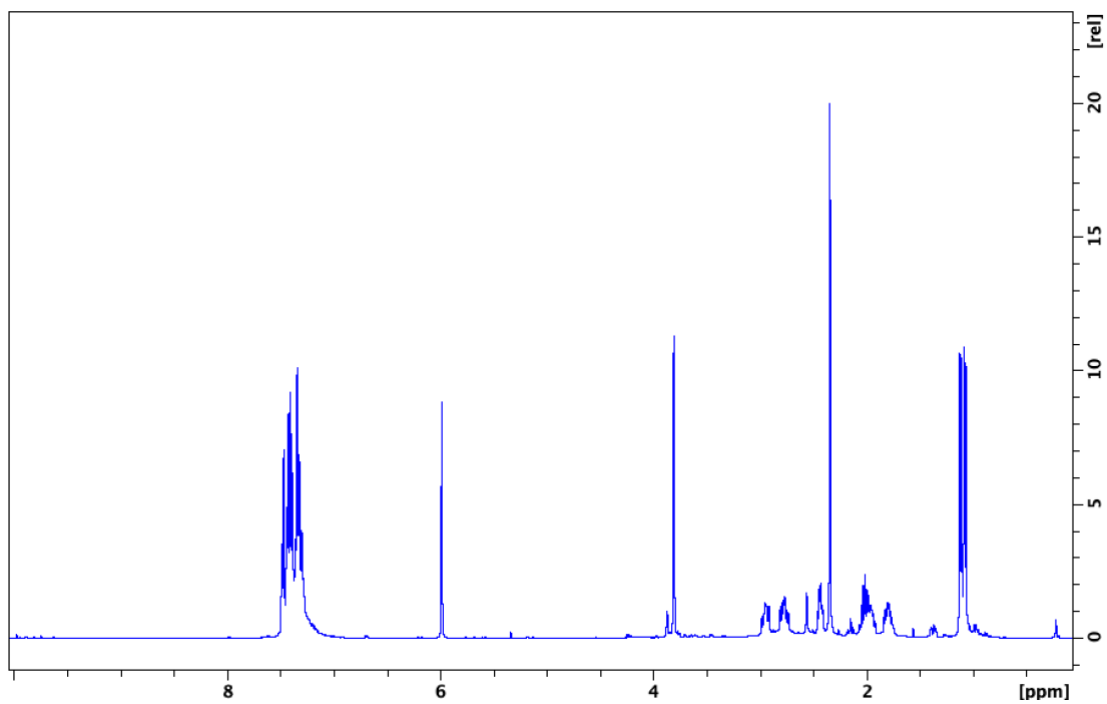

Stacked  $^1\text{H}$  NMRs of unquenched (red) and quenched (blue) reaction mixtures with diagnostic peaks indicated.

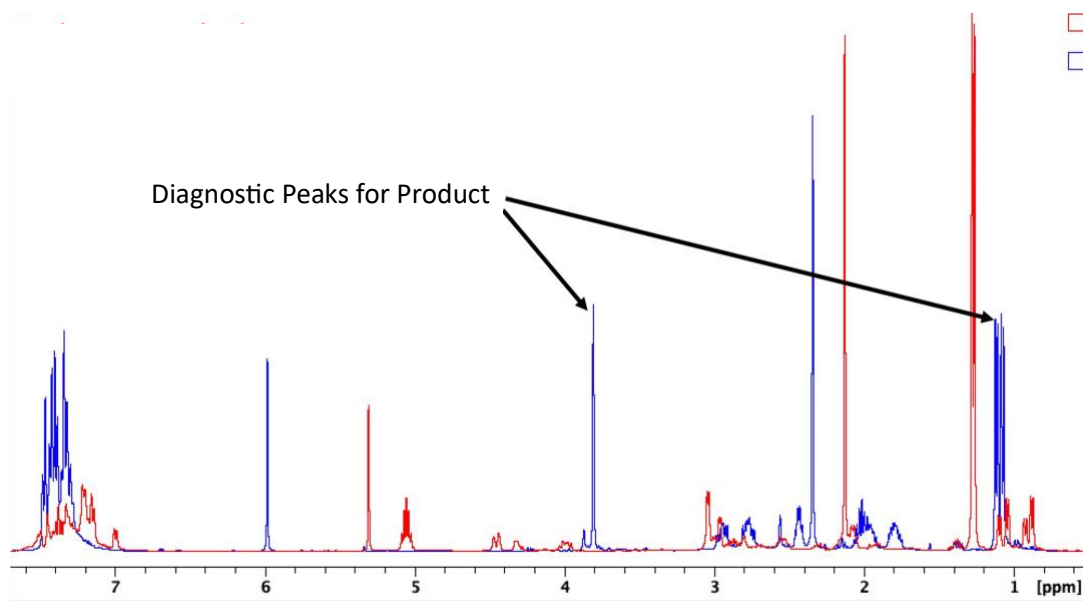



### 6.3.2 Resin quenching screening

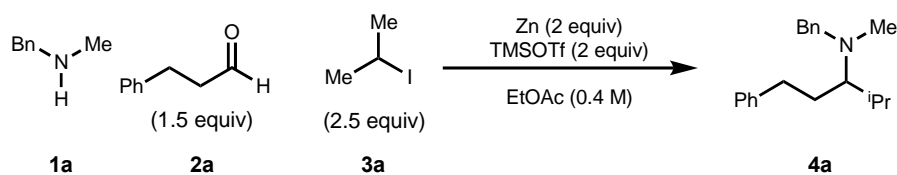

To a 4 mL vial, zinc powder (26 mg, 0.4 mmol, 2 equiv) was added. The vial was sealed, evacuated, and backfilled with N<sub>2</sub>. To the vial, *n*BuOAc (500 μL) was added, followed by N-methylbenzylamine (26 μL, 0.2 mmol, 1 equiv), hydrocinamaldehyde (40 μL, 0.3 mmol, 1.5 equiv) and 2-iodopropane (50 μL, 0.5 mmol, 2.5 equiv). The mixture was stirred for 1 min then TMSOTf (73 μL, 0.4 mmol, 2 equiv) was added. The reaction mixtures were stirred at room temperature for 16 h, then reaction mixture was loaded onto a plug of vacuum-packed resin. After the desired reaction time had passed, the solution was filtered under vacuum and the resin washed with EtOAc (800 μL). The resulting solution was concentrated under reduced pressure to yield the crude reaction mixture.

| Quenching Agent             | Mass / g | Time on resin / h | Diagnostic peak identified in <sup>1</sup> H NMR |
|-----------------------------|----------|-------------------|--------------------------------------------------|
| Aminomethyl polystyrene     | 0.278    | 0.5               | No                                               |
| Rink amide resin            | 0.187    | 1.0               | Yes                                              |
| Basified Amberlite 120-H    | 0.094    | 1.0               | No                                               |
| Activated charcoal          | 0.200    | 1.0               | No                                               |
| Amino functionalised silica | 0.200    | 1.0               | No                                               |
| Amberlite IRA-400           | 1.000    | 2.0               | No                                               |
| Amberlite IRA-96            | 1.200    | 2.0               | Yes                                              |
| Amberlite IRA-743           | 1.200    | 2.0               | Yes                                              |
| Amberlyst A-21              | 0.800    | 2.0               | Yes                                              |
| Amberlite IRA-96            | 0.400    | 3.0               | Yes                                              |
| Amberlite IRA-743           | 0.400    | 3.0               | No                                               |
| Amberlyst A-21              | 0.400    | 3.0               | Yes                                              |

### 6.3.3 Alternative reaction quenching strategies screening

#### Catch and release:

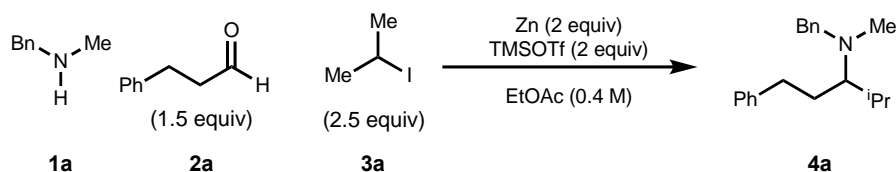

To a 4 mL vial, zinc powder (26 mg, 0.40 mmol, 2 equiv) was added. The vial was sealed, evacuated and backfilled with N<sub>2</sub>. To the vial, *n*BuOAc (500 μL) was added, followed by N-methylbenzylamine (26 μL, 0.2 mmol, 1 equiv), hydrocinamaldehyde (40 μL, 0.3 mmol, 1.5 equiv) and 2-iodopropane (50 μL, 0.5 mmol, 2.5 equiv). The mixture was stirred for 1 min then TMSOTf (73 μL, 0.4 mmol, 2 equiv) was added. The reaction mixtures were stirred at room temperature for 16 h. Then a purification method was attempted, the resulting mixtures concentrated *in vacuo*.

| Resin                                   | Mass             | Time on resin / h | Elution solvent             | Diagnostic product peaks seen in <sup>1</sup> H NMR |
|-----------------------------------------|------------------|-------------------|-----------------------------|-----------------------------------------------------|
| HyperSep SCX cartridge (cat: 60108-420) | 100 mg cartridge | 1                 | 7 M NH <sub>3</sub> in MeOH | Yes                                                 |
| Amberlite 120-H                         | 400 mg           | 4                 | 7 M NH <sub>3</sub> in MeOH | No                                                  |

#### Zinc complexation and removal:

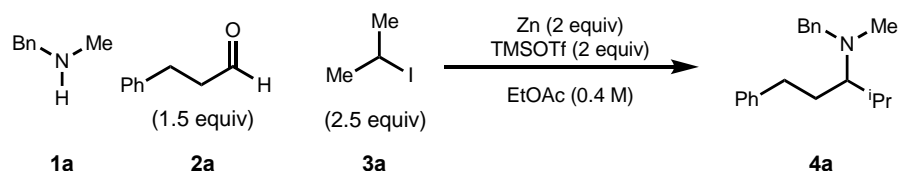

To a 4 mL vial, zinc (26 mg, 0.40 mmol, 2 equiv) was added under inert conditions. To the vial, *n*BuOAc (500 μL) was added, followed by N-methylbenzylamine (26 μL, 0.2 mmol, 1 equiv), 3-phenylpropionaldehyde (40 μL, 0.3 mmol, 1.5 equiv) and 2-iodopropane (50 μL, 0.5 mmol, 2.5 equiv). The mixture was stirred for 1 min then TMSOTf (73 μL, 0.4 mmol, 2 equiv) was added. The reaction mixtures were stirred at room temperature for 16 h. To the reaction mixture, complexation agent was added, and the mixture stirred for time denoted below. The resulting mixture was filtered to remove precipitate and concentrated under reduced pressure.

| Quenching agent           | Mass / mg | Equiv | Time reacting in solution / h | Filtration agent | Diagnostic product peaks seen in <sup>1</sup> H NMR |
|---------------------------|-----------|-------|-------------------------------|------------------|-----------------------------------------------------|
| Triphenyl phosphine oxide | 278       | 5     | 0.5                           | Celite           | No                                                  |
| 2,2'-bipyridine           | 187       | 6     | 1                             | Celite           | Yes                                                 |
| 2,2'-bipyridine           | 94        | 3     | 1                             | Celite           | No                                                  |

### Aqueous quench:

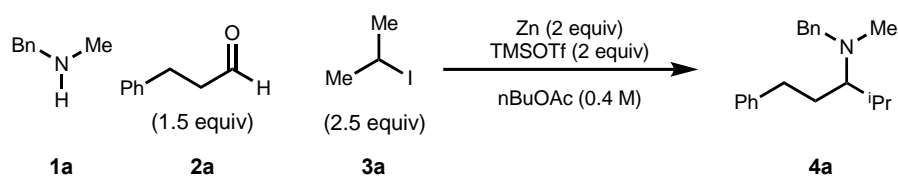

To a 4 mL vial, zinc (26 mg, 0.40 mmol, 2 equiv) was added. The vial was sealed, evacuated and backfilled with N<sub>2</sub>. To the vial, *n*BuOAc (500 μL) was added, followed by N-methylbenzylamine (26 μL, 0.2 mmol, 1 equiv), hydrocinamaldehyde (40 μL, 0.3 mmol, 1.5 equiv) and 2-iodopropane (50 μL, 0.5 mmol, 2.5 equiv). The mixture was stirred for 1 min then TMSOTf (73 μL, 0.4 mmol, 2 equiv) was added. The reaction mixtures were stirred at room temperature for at least 16 h to ensure reaction completion. Then a quenching method was attempted, the resulting mixtures concentrated under reduced pressure.

| Quenching agent              | Amount                     | Reaction time / h | Diagnostic product peaks seen in <sup>1</sup> H NMR |
|------------------------------|----------------------------|-------------------|-----------------------------------------------------|
| 10 % NaOH solution           | 500 μL                     | 0.5               | Yes                                                 |
| 10 % NaOH loaded onto celite | 2 mL on approx. 1 g celite | 2                 | No                                                  |

### 6.3.4 Amberlite IRA-96 quenching optimization

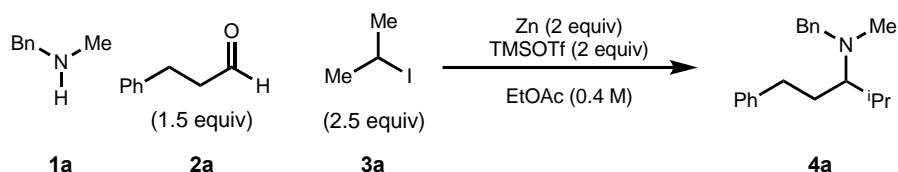

An oven dried vial (Biotage Microwave Process Vial (10 mL), equipped with gas-tight pierceable caps) was charged with a stirring bar, and zinc (52 mg, 0.4 mmol, 2 equiv). The vial was sealed, evacuated and backfilled with N<sub>2</sub>. To this was added EtOAc (1 mL), followed by N-methylbenzylamine (26 μL, 0.2 mmol, 1.0 equiv), hydrocinnamaldehyde (78 μL, 0.4 mmol, 1.5 equiv) and 2-iodopropane (50 μL, 0.5 mmol, 2.5 equiv). The reaction mixture was stirred for 10s, followed by the addition of TMSOTf (73 μL, 0.4 mmol, 2 equiv). The reaction mixture was stirred for 16 hours. Then a quenching method was attempted, the resulting mixtures concentrated under reduced pressure.

| Time reaction mixture exposed to quenching agent | Amount of quenching agent / mg | Minimum equiv of resin to reactive species | Diagnostic product peaks seen in <sup>1</sup> H NMR |
|--------------------------------------------------|--------------------------------|--------------------------------------------|-----------------------------------------------------|
| 5 min                                            | 1000                           | 2.28                                       | Yes                                                 |
| 5 min                                            | 750                            | 1.70                                       | Yes                                                 |
| 5 min                                            | 600                            | 1.37                                       | Yes                                                 |
| 5 min                                            | 550                            | 1.25                                       | No                                                  |
| 5 min                                            | 500                            | 1.14                                       | No                                                  |
| 4 h                                              | 600                            | 1.37                                       | Yes                                                 |
| 4 h                                              | 550                            | 1.25                                       | Yes                                                 |
| 4 h                                              | 500                            | 1.14                                       | Yes                                                 |
| 4 h                                              | 450                            | 1.02                                       | Yes                                                 |
| 4 h                                              | 400                            | 0.91                                       | Yes                                                 |
| 4 h                                              | 350                            | 0.80                                       | No                                                  |

## 6.4 Modified Nanonest and Sealing Method (General Procedure D)

### 6.4.1 Modified NanoNest Design

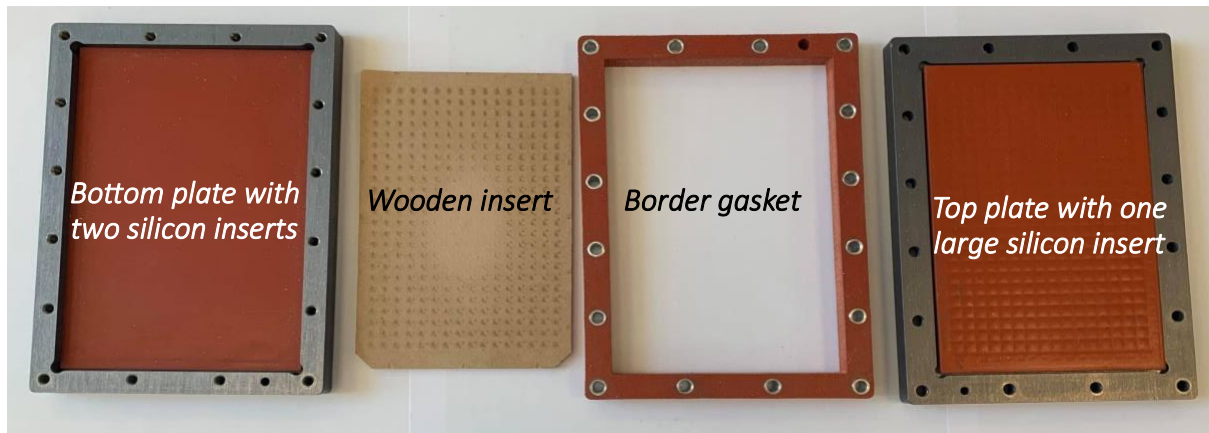

**Figure S4:** The Nanonest enclosure separated into its composite parts

### 6.4.2 Plate sealing procedure.

A PFA mat (0.125 mm thickness, FLONFILMTM 600 PFA film) was placed on top of the microplate wells and sealed with electrical tape around the edges (see figure below). The plate was placed onto two silicon matts inside the bottom NanoNest plate. A silicon gasket was placed around the plate and a further PFA sheet and silicon matt placed on top of the microplate. The top aluminium plate was used to compress the apparatus through gradual tightening of 12 screws in a cross wise pattern.

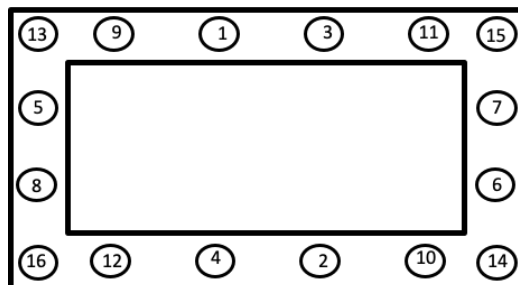

The order the NanoNest enclosure screws were turned.

## 6.4.2 Demonstration of sealing,

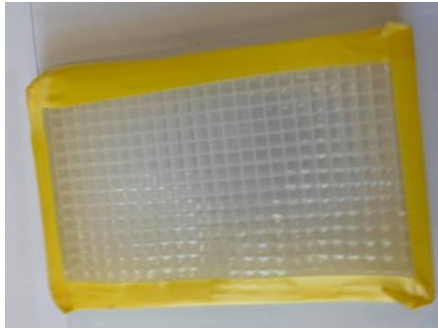

1. The microplate is sealed with a PFA sheet by electrical tape.

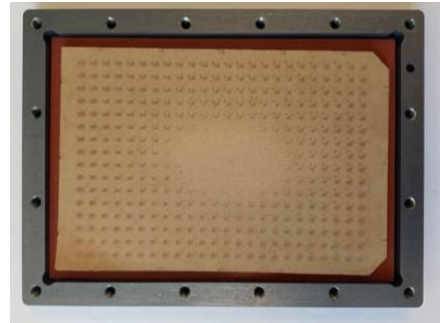

2. The wooden insert is placed inside the bottom plate.

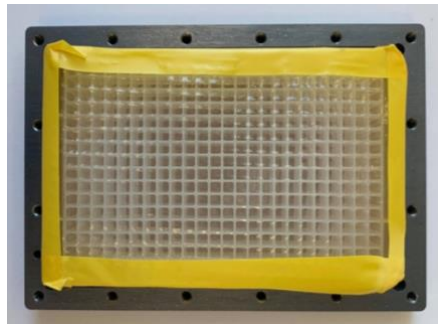

4. The microplate is placed on top of the wooden insert.

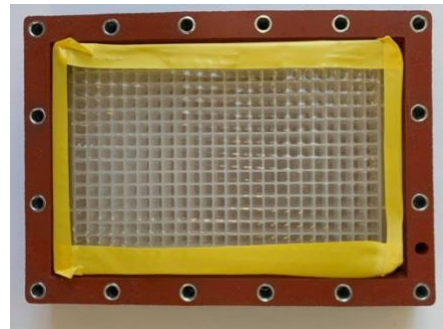

3. The gasket is placed around the microplate.

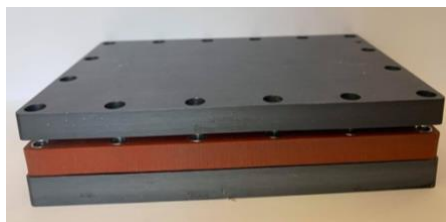

5. A second PFA sheet is placed on top of the microplate and then the top plate is placed on top.

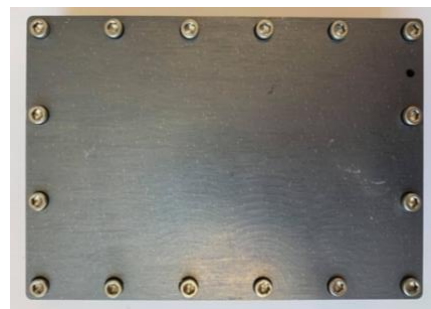

6. The enclosure is secured and compressed with bolts (following General Procedure **D**)

## 6.5 Multi amine array validation experiment

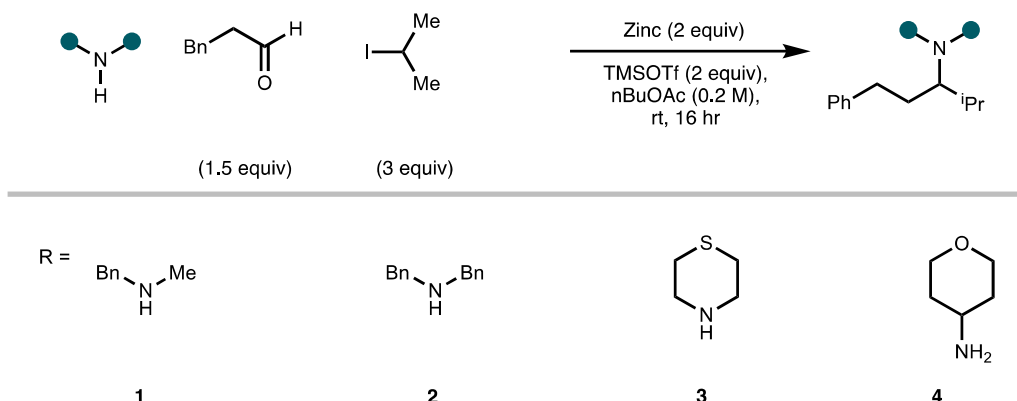

Stock solutions of N-methylbenzylamine (0.8 M), thiomorpholine (0.8 M), dibenzylamine (0.8 M), 4-aminotetrahydrofuran (0.8 M), 2-iodopropane (2.4 M), hydrocinnamaldehyde (1.2 M) and TMSOTf (1 M) in *n*BuOAc were prepared. To a 384 well microplate, Zn dust (20  $\mu$ mol) was dosed into the wells via a zinc:*n*BuOAc slurry (12.5  $\mu$ L, 10 %w/v) using an electronic pipette and the solvent removed via centrifugal evaporation. Then, stirrer bars (2 mm x 2 mm) were added to each well. The stock solutions and plate were transferred inside of the purge box and placed under a nitrogen atmosphere (5 x vacuum back refill). Amine (12.5  $\mu$ L) and aldehyde (12.5  $\mu$ L) stock solutions were dosed into their corresponding wells and then mixed (5 x 17.5  $\mu$ L mix volume, 20  $\mu$ L aspirate volume, integra pipette mix function). Then, alkyl halide (12.5  $\mu$ L) and TMSOTf (12.5  $\mu$ L) stock solutions were dosed, in order, to their corresponding wells. The plate was sealed according to General Procedure **D** and taken out of the purge box. The Nanonest was placed onto a hot plate and stirred at 1000 rpm.

After 24 h, the Nanonest was left to cool to room temperature, then opened and the PFA sealed plate was centrifuged for 10s. Then the PFA film was removed, and the reaction mixtures were transferred onto Amberlite IRA-96 resin (100 mg) loaded into a 96 well filter plate. The reaction wells were washed with two reaction volumes of EtOAc. The filter plate was placed onto of a 96 well receiver plate and centrifuged at 10,000 rpm for 10 s. The resin was washed with EtOAc (300  $\mu$ L) and centrifuged again. The resin was washed again with EtOAc (50  $\mu$ L) and centrifuged for 20s. The solvent was removed using the “high + low boiling point” setting on the Genevac EZ-2 elite with a 40 min ‘time to final stage’ and a 20 min final stage with a maximum temperature of 40 °C. The concentrated reaction mixtures were transferred into the purge box and placed under a nitrogen atmosphere (5 x vacuum back refill).

To each well internal standard (1  $\mu$ L, 1,1,2,2-tetrachloroethane) was dosed and then CDCl<sub>3</sub> (60  $\mu$ L) were added. All 12 repeat wells were added to the same NMR tube (7 mm). Each well was rinsed with additional CDCl<sub>3</sub> (60  $\mu$ L) and added to the same NMR tube. Yields were determined as an average across all 12 reactions against the internal standard.

| Entry | Amine                  | Yield / % |
|-------|------------------------|-----------|
| 1     | N-methylbenzylamine    | 80        |
| 2     | thiomorpholine         | 97        |
| 3     | dibenzylamine          | 62        |
| 4     | 4-aminotetrahydrofuran | 84        |





## 6.7 Scavenger resin purification optimization

### 6.7.1 Secondary amine removal resin optimization.

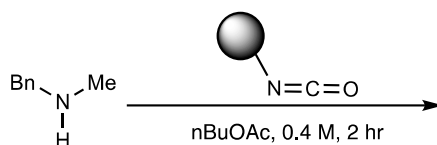

MP-isocyanate resin (x g) was added to a solution of N-methylbenzylamine (26  $\mu\text{L}$ , 0.2 mmol, 1 equiv) in *n*BuOAc (500  $\mu\text{L}$ ). After 2 h, the solution was filtered under vacuum and the resin washed with EtOAc (800  $\mu\text{L}$ ). The resulting solvent was removed *in vacuo* to yield the residual amine.

| Mass of resin /g | Resin equiv | Amine remaining / % |
|------------------|-------------|---------------------|
| 0.40             | 2.6         | 3                   |
| 0.30             | 1.9         | 4                   |
| 0.20             | 1.3         | 7                   |

### 6.7.2 Secondary amine removal resin optimization.

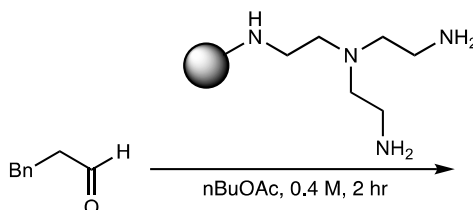

The resin (x g) was added to a solution of hydrocinamaldehyde (1 equiv) in *n*BuOAc (500  $\mu\text{L}$ ). After 2 h, the solution was filtered under vacuum and the resin washed with EtOAc (800  $\mu\text{L}$ ). The resulting solvent was removed *in vacuo* to yield the residual aldehyde.

| Resin                               | Hydrocinamaldehyde / mmol | Mass of resin /g | Resin equiv | Aldehyde remaining / % |
|-------------------------------------|---------------------------|------------------|-------------|------------------------|
| Tris(aminoethylamine) polymer bound | 0.30                      | 0.40             | 2.3         | 14                     |
| Tris(aminoethylamine) polymer bound | 0.30                      | 0.20             | 1.7         | 72                     |
| Tris(aminoethylamine) polymer bound | 0.10                      | 0.20             | 3.5         | 3                      |
| Tris(aminoethylamine) polymer bound | 0.10                      | 0.10             | 1.75        | 3                      |
| Sulfonyl hydrazine resin            | 0.30                      | 0.40             | 1.73        | 5                      |

### 6.7.3 Multi-resin purification screening:

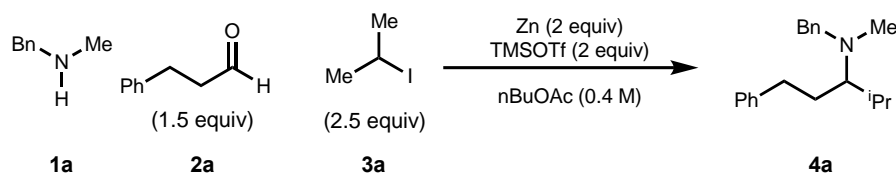

To a 4 mL vial, zinc (26 mg, 0.40 mmol, 2 equiv) was added. The vial was sealed, evacuated and backfilled with N<sub>2</sub>. To the vial, nBuOAc (500 μL) was added, followed by N-methylbenzylamine (26 μL, 0.2 mmol, 1 equiv), hydrocinnamaldehyde (40 μL, 0.3 mmol, 1.5 equiv) and 2-iodopropane (50 μL, 0.5 mmol, 2.5 equiv). The mixture was stirred for 1 min then TMSOTf (73 μL, 0.4 mmol, 2 equiv) was added. The reaction mixtures were stirred at room temperature for at least 16 h to ensure reaction completion. The reaction mixture was then subjected to one of the methods outlined below:

#### **3 resins layered:**

A reaction mixture was loaded onto layered (in respective order) Amberlite-IRA96 (600 mg), tris(aminoethyl)amine polymer based (400 mg) and MP-isocyanate resin (200 mg). The mixture was left on the resins for 2 hours before being pulled through with vacuum and the resins were washed with EtOAc (800 μL) before the resulting solvent was removed *in vacuo* to yield the crude product.

#### **4 resins layered:**

A reaction mixture was loaded onto a premixed mixture of Amberlite-IRA96 (600 mg), tris(aminoethyl)amine polymer based (400 mg), MP-isocyanate resin (200 mg) and activated charcoal (66 mg). The mixture was left on the resins for 2 hours before being pulled through with vacuum and the resins were washed with EtOAc (800 μL) before the resulting solvent was removed *in vacuo* to yield the crude product.

#### **2 independent filter steps:**

A reaction mixture was loaded onto Amberlite-IRA96 (600 mg) for 5 mins and filtered under vacuum. The resin was washed with EtOAc (800 μL), and the resulting solvent removed *in vacuo*. The crude material was redissolved in nBuOAc (500 μL) and loaded onto a mix of tris(aminoethyl)amine polymer based (400 mg) and MP-isocyanate resin (200 mg) and activated charcoal (66 mg). The mixture was left on the resins for 2 hours before being pulled through with vacuum and the resins were washed with EtOAc (800 μL) before the resulting solvent was removed *in vacuo* to yield the crude product.

The resulting crudes were analysed by <sup>1</sup>H NMR focusing on the removal of the starting material amine, aldehyde, and a small minority of aldol by-products (shown below).

Stacked  $^1\text{H}$  NMR (0-4 ppm) highlighting the product (blue) and the starting material amine (beige) after each workup method. Cleanest product is obtained from the multistep quenching and purification workflow.

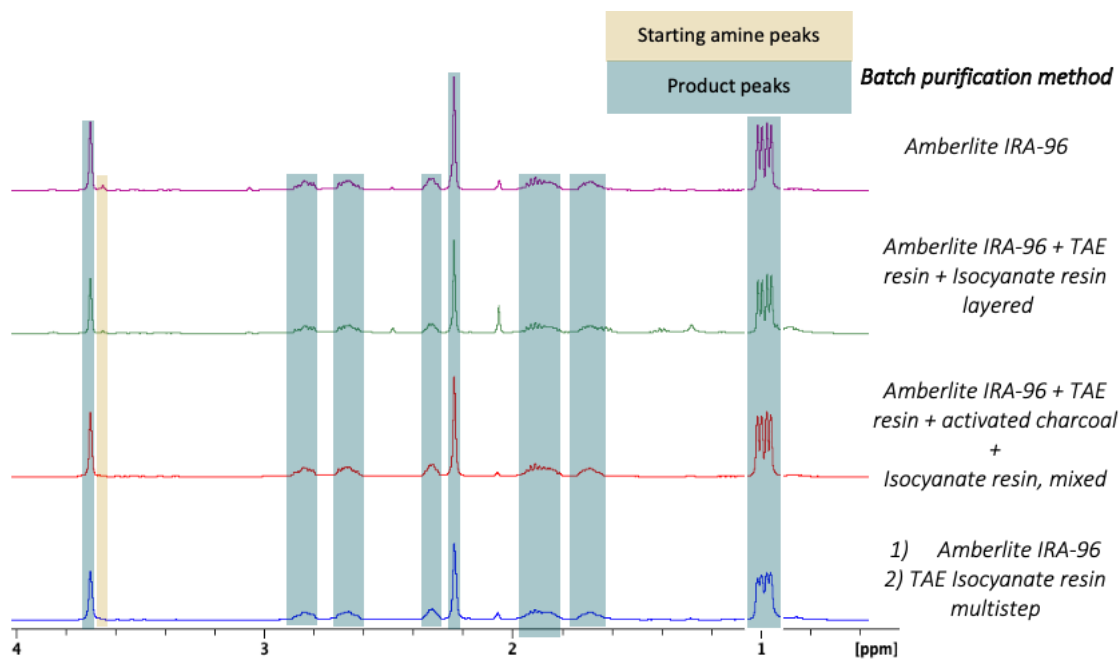

Stacked  $^1\text{H}$  NMR (10.1-9.3 ppm) highlighting the starting material aldehyde (blue) after each workup method. Cleanest product is obtained from the multistep quenching and purification workflow with removal of the majority of aldol side products.

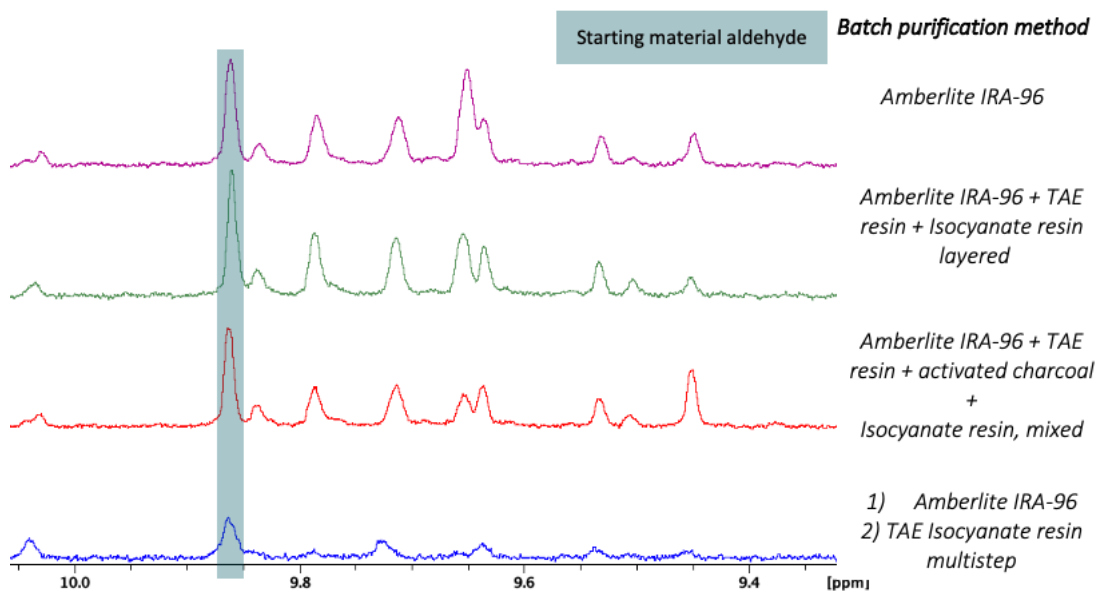

The full  $^1\text{H}$  NMR for each purification trial outcomes are shown below in  $\text{CDCl}_3$  using 1,1,2,2-tetrachloroethane as an internal standard.

The  $^1\text{H}$  NMR of the reaction mixture after quenching using Amberlite IRA-96.

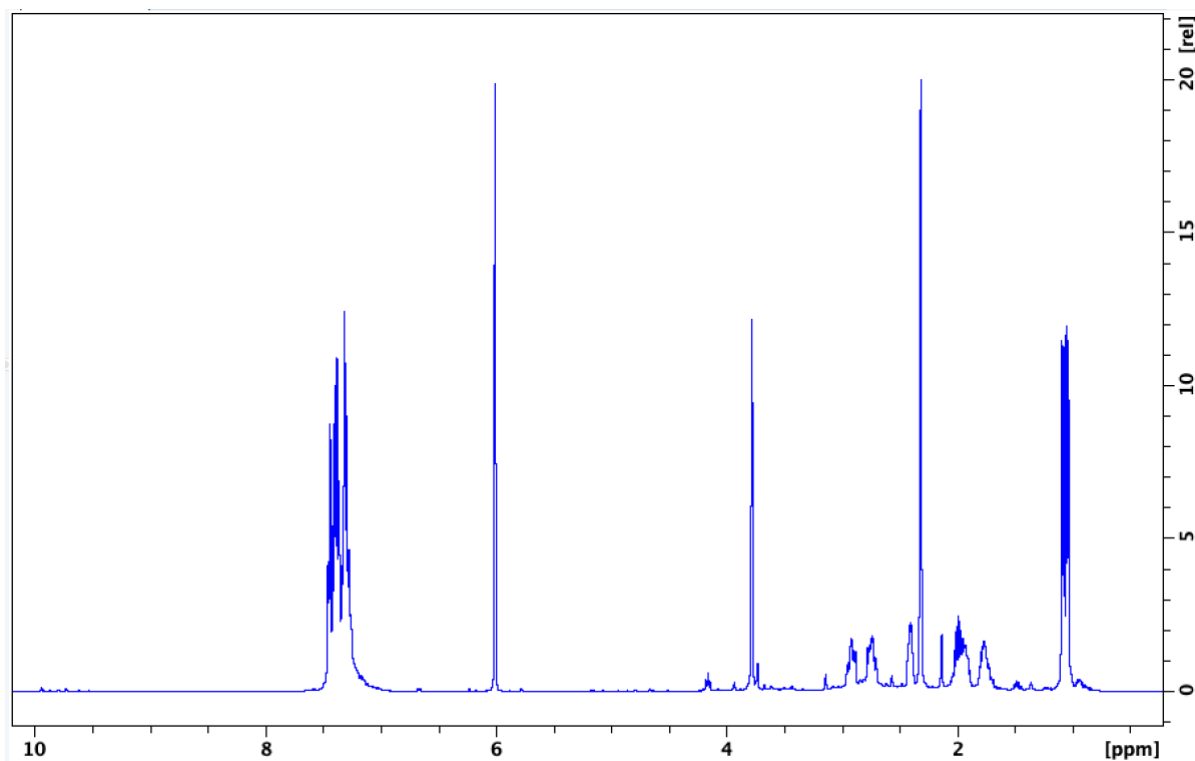

The  $^1\text{H}$  NMR of the reaction mixture for the 3 layered resins purification trial.

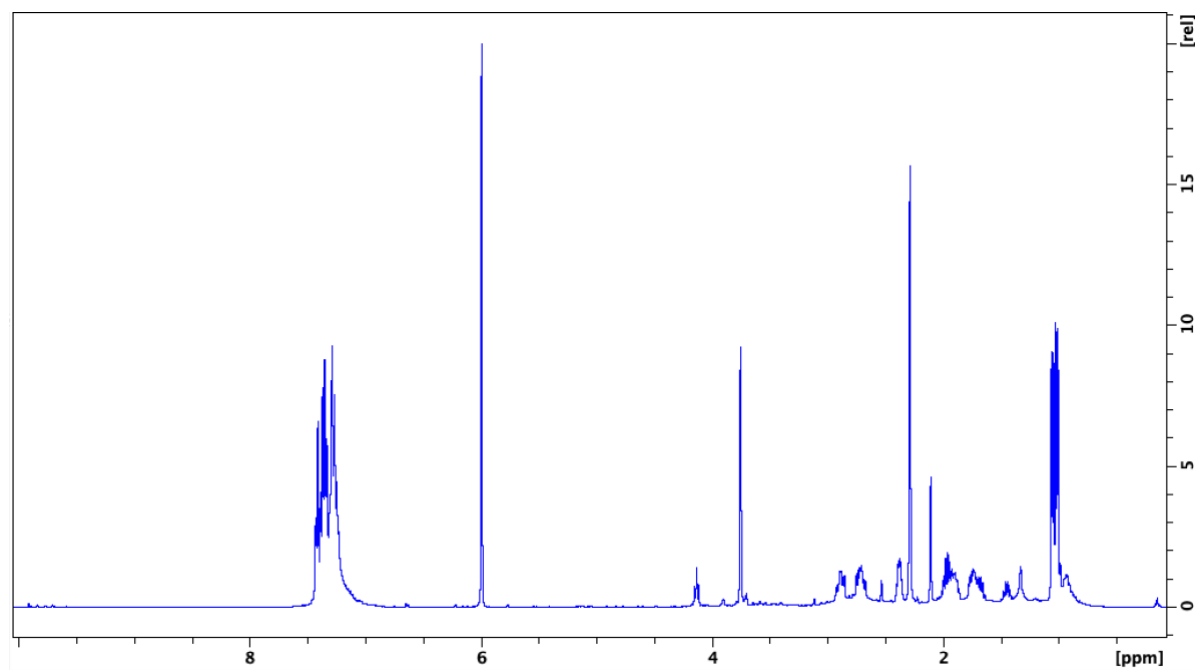

The  $^1\text{H}$  NMR of the reaction mixture for the 4 resins mixed purification trial.

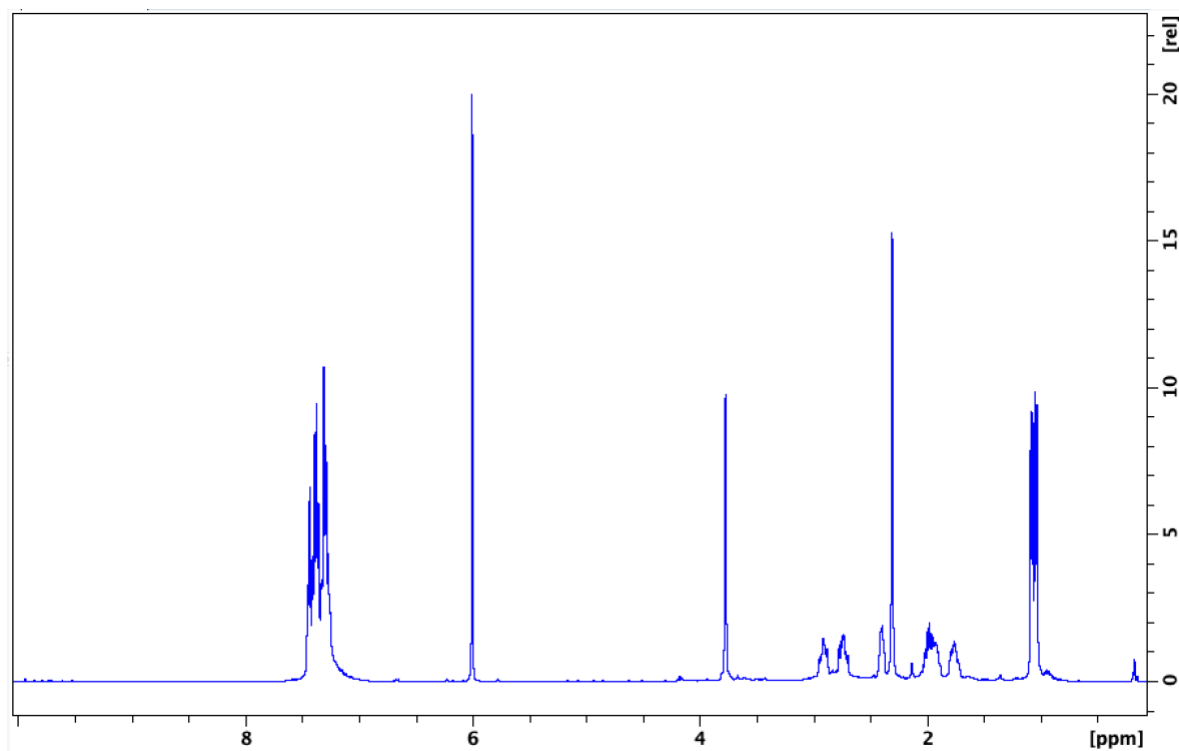

The  $^1\text{H}$  NMR of the reaction mixture for the 2 step, multi-resin purification trial.

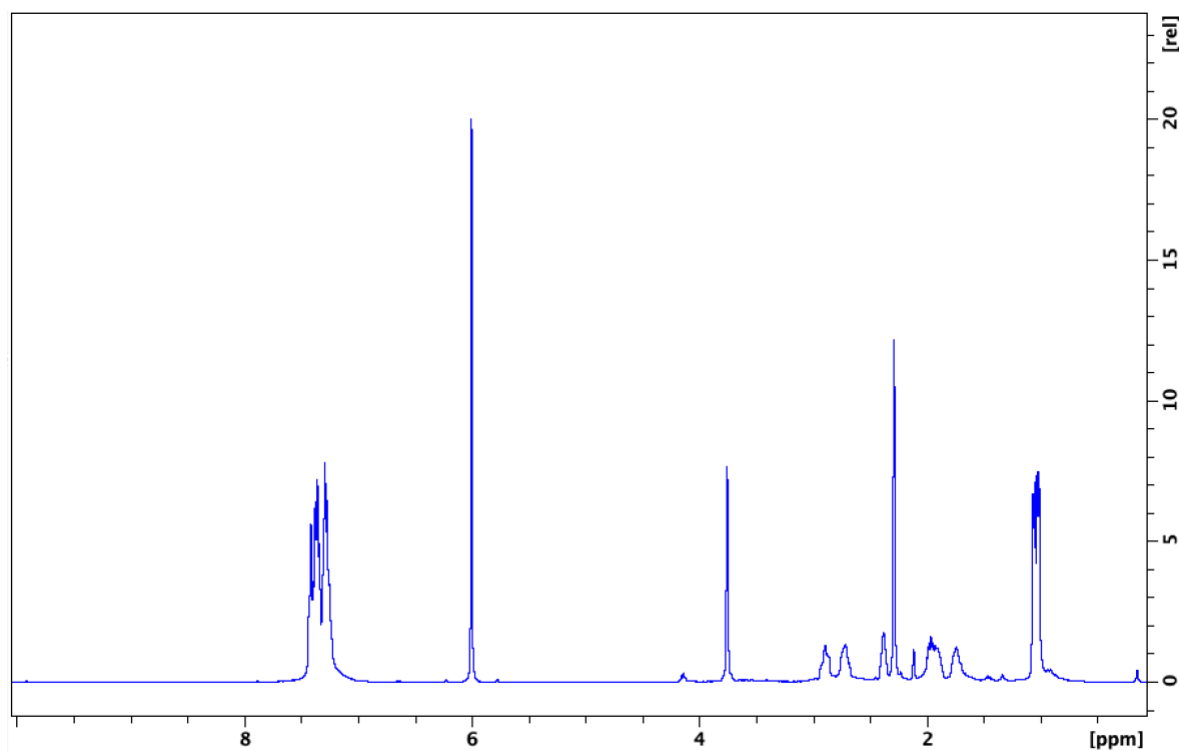

## 6.8 High-throughput Reaction Screening (primary iodide optimization)

### 6.8.1 High throughput screening

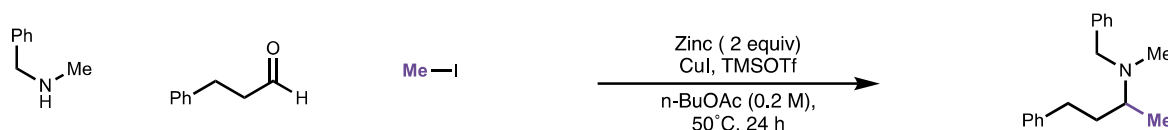

Stock solutions of N-methylbenzylamine (0.8 M), hydrocinnamaldehyde (1.2, 1.6 M), methyl iodide (2.4, 3.2, 4.0, 4.8 M), and TMSOTf (1.2 and 1.4 M) in *n*-BuOAc were prepared. To two 384 well plates, Zn dust (20  $\mu$ mol) was dosed into the central 48 wells (figure 4) via a zinc:*n*-BuOAc slurry (12.5  $\mu$ L, 10 %w/v) using an electronic pipette and the solvent removed via centrifugal evaporation.

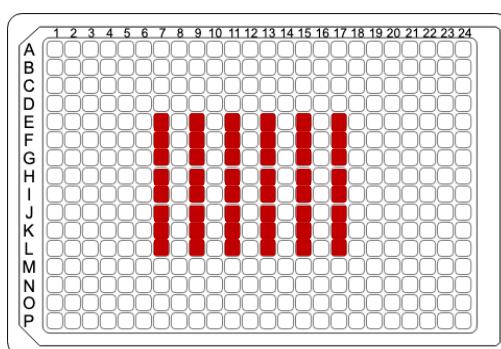

**Figure S10:** Zinc slurries dosed into central wells

Then, stirrer bars (2 mm x 2 mm) were added to each well. The stock solutions and plate were transferred inside of the purge box and placed under a nitrogen atmosphere (5 x vacuum back refill). Amine (12.5  $\mu$ L) and aldehyde (12.5  $\mu$ L) stock solutions were dosed into their corresponding wells and then mixed (5 x 17.5  $\mu$ L mix volume, 20  $\mu$ L aspirate volume, integra pipette mix function). Then, alkyl halide (12.5  $\mu$ L) and TMSOTf (12.5  $\mu$ L) stock solutions were dosed, in order, to their corresponding wells. The plate was sealed according to General Procedure **D** and taken out of the purge box. The Nanonest was placed onto a hot plate and heated to 50 °C and stirred at 1000 rpm (figure 5). Stirring the reaction at 50 °C, instead of ambient temperature, can ensure uniform mixing for reproducible yields.

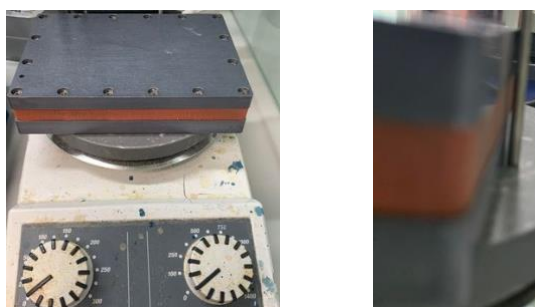

**Figure S11:** Nanonest enclosure on hotplate (left);  
Temperature probe positioned against Nanonest and top of hot plate (right)

After 24 h, the Nanonest was left to cool to room temperature, then opened and the PFA sealed plate was centrifuged for 10s. Then the PFA film was removed, and the reaction mixtures were transferred onto Amberlite IRA-96 resin (100 mg) loaded into a 96 well filter plate. The reaction wells were

washed with two reaction volumes of EtOAc. The filter plate was placed onto of a 96 well receiver plate and centrifuged at 10,000 rpm for 10 s. The resin was washed with EtOAc (300  $\mu$ L) and centrifuged again. The resin was washed again with EtOAc (50  $\mu$ L) and centrifuged for 20 s. The solvent was removed using the “high + low boiling point” setting on the Genevac EZ-2 elite with a 40 min ‘time to final stage’ and a 20 min final stage with a maximum temperature of 40 °C. The concentrated reaction mixtures were transferred into the purge box and placed under a nitrogen atmosphere (5 x vacuum back refill). To each well internal standard (1 $\mu$ L, TCE) was dosed and then DMSO-*d*<sub>6</sub> (200  $\mu$ L) was added. Each mixture was mixed and then transferred to a 3mm NMR tube (Bruker, Z112272) using a disposable syringe and needle. The NMR tubes were capped with a closed cap (Bruker, Z107163) and placed in a 96 well block (Bruker, Z112272). The NMR samples were placed inside of a Bruker SampleJet Autosampler and a <sup>1</sup>H NMR was recorded for each sample (1 scan, 90° pulse, d1 = 5s, no delay). Yields were determined relative to internal standard based on the methyl group alpha to the amine.

### 6.8.2 Batch Screening

An oven dried vial (Biotage Microwave Process Vial (10 mL), equipped with gas-tight pierceable caps) was charged with a stirring bar, copper iodide (30 mg, 0.16 mmol, 0.4 equiv) and Zn dust (0.8-1.2 mmol, 2-3 equiv). The vial was sealed, evacuated and backfilled with N<sub>2</sub>. To this was added *n*-BuOAc, followed by N-methylbenzylamine (52  $\mu$ L, 0.4 mmol, 1.0 equiv) and hydrocinnamaldehyde (108  $\mu$ L, 2 mmol, 2 equiv). The mixture was stirred for 15 min. Iodomethane (100  $\mu$ L, 1.6 mmol, 4 equiv) was added. The reaction mixture was stirred for 10s, followed by the addition of TMSOTf (108  $\mu$ L, 0.6 mmol, 1.5 equiv). The reaction mixture was stirred for 24 hours. The reaction mixture was worked up according to general procedure **B** and yields were determined by <sup>1</sup>H NMR using 1,1,2,2-tetrachloroethane as internal standard.

| Entry | Zn Equiv | Concentration / M | <sup>1</sup> H NMR yield /% |
|-------|----------|-------------------|-----------------------------|
| 1     | 2        | 0.2               | 40                          |
| 2     | 3        | 0.2               | 67                          |
| 3     | 2        | 0.4               | 83                          |
| 4     | 3        | 0.4               | 96                          |
| 5     | 2        | 0.8               | 77                          |

## 7. CuI assisted Zn-mediated carbonyl alkylative amination

### 7.1 General procedure E (primary alkyl iodides / benzaldehydes)

An oven dried vial (Biotage Microwave Process Vial (10 mL), equipped with gas-tight pierceable caps) was charged with a stirring bar, Zn dust (1.2 mmol, 3 equiv) and copper iodide (0.16 mmol, 40 mol%) (and amine HCl salt (0.4 mmol, 1 equiv) if used). The vial was sealed, evacuated and backfilled with N<sub>2</sub>. To this was added *n*BuOAc (1 mL), followed by the amine (0.4 mmol, 1.0 equiv) (if HCl salt not used), the aldehyde (0.8 mmol, 2.0 equiv). The mixture was stirred for 15 minutes then, whilst stirring, alkyl iodide (1.2 – 1.6 mmol, 3-4 equiv) then TMSOTf (0.3-0.4 mmol, 1.5-2.0 equiv). The reaction mixture was stirred overnight. The crude mixture was transferred into a 50 ml round bottom flask and diluted with dichloromethane (approximately 20 mL). NaOH (approximately 15 mL, 10% aq.) was added. The heterogenous mixture was vigorously stirred for 10-15 min. The aqueous layer was extracted with dichloromethane three times. The combined organic layer was dried over anhydrous MgSO<sub>4</sub> or Na<sub>2</sub>SO<sub>4</sub>. Solvent was evaporated under reduced pressure. If the product is not pure, column chromatography on silica gel is performed.



## 7.2 Expanded Scope

### N-Benzyl-N-methyl-1-phenylbutan-3-amine (10m)

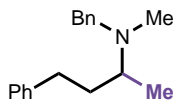

N-Benzyl-N-methyl-1-phenylbutan-3-amine was prepared according to General Procedure **E** using Zn (78 mg, 1.2 mmol, 3 equiv), copper iodide (30 mg, 0.16 mmol, 0.4 equiv), N-methylbenzylamine (52  $\mu$ L, 0.4 mmol, 1 equiv), hydrocinnamaldehyde (108  $\mu$ L, 0.8 mmol, 2 equiv), iodomethane (100  $\mu$ L, 1.26mmol, 4 equiv), and TMSOTf (106  $\mu$ L, 0.6 mmol, 1.5 equiv) in *n*BuOAc (1 mL). Crude material was purified by an acid-base wash according to general procedure **ABW**, to afford the product as a colourless oil (82 mg, 81%). Data was in line with previous characterisation.<sup>1</sup>

### N,N-Dibenzyl-1-phenylbutan-3-amine (11a)

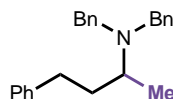

N,N-Dibenzyl-1-phenylbutan-3-amine was prepared according to General Procedure **E** using Zn (78 mg, 1.2 mmol, 3 equiv), copper iodide (30 mg, 0.16 mmol, 0.4 equiv), dibenzylamine (117  $\mu$ L, 0.4 mmol, 1.0 equiv), hydrocinnamaldehyde (108  $\mu$ L, 0.8 mmol, 2 equiv), iodomethane (100  $\mu$ L, 1.26mmol, 4 equiv), and TMSOTf (106  $\mu$ L, 0.6 mmol, 1.5 equiv) in *n*BuOAc (1 mL). Crude material was purified by column chromatography (4.5% Et<sub>2</sub>O in Pet. Ether (with 0.5% NEt<sub>3</sub>)) to afford the product as a colourless oil (59 mg, 45%).

**<sup>1</sup>H NMR** (500MHz, CDCl<sub>3</sub>)  $\delta$  7.46 (d, J = 7.3 Hz, 4H), 7.37 (t, J = 7.5 Hz, 4H), 7.29 (t, J = 7.5 Hz, 4H), 7.24-7.19 (m, 1H), 7.15 (d, J = 8.2 Hz, 2H), 3.81 (d, J = 13.7, 2H), 3.51 (d, J = 13.8 Hz, 2H), 2.92-2.83 (m, 2H), 2.61 – 2.43 (m, 1H), 2.05-1.95 (m, 1H), 1.67 – 1.55 (m, 1H), 1.12 (d, J = 6.6 Hz, 3H).

**<sup>13</sup>C NMR** (126 MHz, CDCl<sub>3</sub>)  $\delta$  143.1, 140.7, 128.8, 128.4, 128.3, 128.2, 126.7, 125.6, 53.4, 52.4, 36.2, 33.4, 13.5.

**IR** (film, cm<sup>-1</sup>): 3024,2928,1493, 1452, 1150, 1027, 741, 695, 467.

**HRMS**: m/z calcd for [M+H]<sup>+</sup> 330.2216; found 330.2219.

### 1-N-Cbz-4-(4-phenylbutan-2-yl)piperazine (11b)

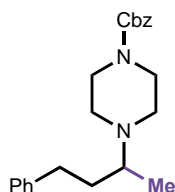

1-N-Cbz-4-(4-phenylbutan-2-yl)piperazine was prepared according to General Procedure **E** using Zn (78 mg, 1.2 mmol, 3 equiv), copper iodide (30 mg, 0.16 mmol, 0.4 equiv), N-Cbz-piperazine hydrochloride (103 mg, 0.4 mmol, 1.0 equiv), hydrocinnamaldehyde (108  $\mu$ L, 0.8 mmol, 2 equiv), iodomethane (100  $\mu$ L, 1.26 mmol, 4 equiv), and TMSOTf (106  $\mu$ L, 0.6 mmol, 1.5 equiv) in *n*BuOAc (1 mL). Crude material was purified by column chromatography (15% Et<sub>2</sub>O in Pet. Ether), yielding the product as a colourless oil (82 mg, 58%).

<sup>1</sup>H NMR (500 MHz, CDCl<sub>3</sub>)  $\delta$  7.40 (d, J = 4.5 Hz, 4H), 7.38- 7.28(m, 3H), 7.22 (d, J = 7.4 Hz, 3H), 5.17 (s, 2H), 3.63-3.48 (m, 4H), 2.76-2.60 (m, 3H), 2.67 (brs, 2H), 2.56 (brs, 2H), 1.93-1.83 (m, 1H), 1.65-1.55 (m, 1H), 1.02 (d, J = 6.6 Hz, 3H).

<sup>13</sup>C NMR (101 MHz, CDCl<sub>3</sub>)  $\delta$  155.3, 142.5, 136.9, 128.5 (d, J = 7.2 Hz), 128.3, 128.0, 127.9, 125.9, 125.7, 67.1, 58.4, 47.9, 44.3, 35.4, 32.9, 13.8.

IR (film, cm<sup>-1</sup>): 2932, 2859, 1697, 1452, 1427, 1237, 1119, 749, 732, 696.

HRMS: m/z calcd for 353.2224 [M+H]<sup>+</sup>; found 353.2225.

### N-Benzyl-N-methyl-1-phenylhexan-3-amine (10n)

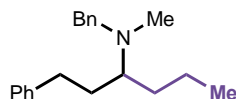

N-Benzyl-N-methyl-1-phenylhexan-3-amine was prepared according to General Procedure **E** using Zn (78 mg, 1.2 mmol, 3 equiv), copper iodide (30 mg, 0.16 mmol, 0.4 equiv), N-methylbenzylamine (52  $\mu$ L, 0.4 mmol, 1.0 equiv), hydrocinnamaldehyde (108  $\mu$ L, 0.8 mmol, 2 equiv), 1-iodopropane (156  $\mu$ L, 1.6 mmol, 4 equiv), and TMSOTf (106  $\mu$ L, 0.6 mmol, 1.5 equiv) in *n*BuOAc (1 mL). Crude material was purified by an acid-base wash according to general procedure **ABW**, to afford the product as a colourless oil (73 mg, 65%). Data was in line with previous characterisation.<sup>1</sup>

### N-benzyl-N-methyl-1,5-diphenylpentan-3-amine (11c)

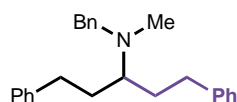

N-benzyl-N-methyl-1,5-diphenylpentan-3-amine was prepared according to General Procedure **E** using Zn (78 mg, 1.2 mmol, 3 equiv), copper iodide (30 mg, 0.16 mmol, 0.4 equiv), N-methylbenzylamine hydrochloride (63 mg, 0.4 mmol, 1.0 equiv), hydrocinnamaldehyde (108  $\mu$ L, 0.8 mmol, 2 equiv), (2-iodoethyl)benzene (174  $\mu$ L, 1.2 mmol, 3 equiv) and TMSOTf (36  $\mu$ L, 0.2 mmol, 0.5 equiv) in *n*BuOAc (1 mL). Crude material was purified by column chromatography (0-15% Et<sub>2</sub>O in Pet. Ether (3.0% NEt<sub>3</sub>)) to afford a colourless oil (59 mg, 43%). Data was in line with previous characterisation.<sup>1</sup>

### N-benzyl-1-fluoro-N-methyl-5-phenylpentan-3-amine (11d)

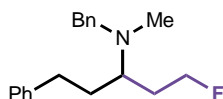

N-benzyl-1-fluoro-N-methyl-5-phenylpentan-3-amine was prepared according to General Procedure **E** using Zn (78 mg, 1.2 mmol, 3 equiv), copper iodide (30 mg, 0.16 mmol, 0.4 equiv), N-methylbenzylamine hydrochloride (63 mg, 0.4 mmol, 1.0 equiv), hydrocinnamaldehyde (108  $\mu$ L, 0.8 mmol, 2 equiv), 1-fluoro-2-iodoethane (105  $\mu$ L, 1.2 mmol, 3 equiv) and TMSOTf (36  $\mu$ L, 0.2 mmol, 0.5 equiv) in *n*BuOAc (1 mL). Crude material was purified by column chromatography (0-20% EtOAc in Pet. ether) to afford the product as a colourless oil (68 mg, 60%).

<sup>1</sup>H NMR (500 MHz, CDCl<sub>3</sub>): 7.32 – 7.27 (m, 6H), 7.25 – 7.17 (m, 4H), 4.71 – 4.44 (m, 2H), 3.57 (d, J = 2.2 Hz, 2H), 2.80 – 2.63 (m, 3H), 2.16 (s, 3H), 2.02 – 1.87 (m, 2H), 1.84 – 1.72 (m, 1H), 1.66 – 1.57 (m, 1H).

<sup>13</sup>C NMR (126 MHz, CDCl<sub>3</sub>): 142.5, 140.1, 128.6, 128.41, 128.39, 128.2, 126.8, 125.8, 82.6 (d, J = 163.6 Hz), 58.5 (d, J = 5.4 Hz), 58.0, 36.1, 33.4, 31.8, 30.8 (d, J = 19.1 Hz).

<sup>19</sup>F NMR (376 MHz, CDCl<sub>3</sub>):  $\delta$  -219.25.

IR (film, cm<sup>-1</sup>): 2929, 2854, 2255, 1983, 1495, 1370, 837.

HRMS: *m/z* calcd for C<sub>19</sub>H<sub>24</sub>NF [M+H]<sup>+</sup> 286.1966; found 286.1966.

### N-Benzyl-N-methyl-1-phenylhexan-3-amine (11e)

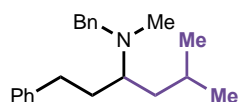

N-Benzyl-N-methyl-1-phenylhexan-3-amine was prepared according to General Procedure **E** using Zn (78 mg, 1.2 mmol, 3 equiv), copper iodide (30 mg, 0.16 mmol, 0.4 equiv), N-methylbenzylamine hydrochloride (63 mg, 0.4 mmol, 1.0 equiv), hydrocinnamaldehyde (108  $\mu$ L, 0.8 mmol, 2 equiv), 1-Iodo-2-methylpropane (138  $\mu$ L, 1.2 mmol, 3 equiv), and TMSOTf (36  $\mu$ L, 0.2 mmol, 0.5 equiv) in *n*BuOAc (1 mL). Crude material was purified by column chromatography (0-10% (10% Et<sub>2</sub>O:90% Pet. Ether: NEt<sub>3</sub> 3%) in Pet. Ether) afford the product as a colourless oil (47 mg, 40%).

<sup>1</sup>H NMR (500 MHz, CDCl<sub>3</sub>)  $\delta$  7.39-7.29 (m, 6H), 7.29-7.20 (m, 4H), 3.61 (d, J = 13.7 Hz, 1 H), 3.57 (d, J = 13.7, 2H), 2.82-2.74 (m, 1H), 2.73-2.67 (m, 1H), 2.67-2.60 (m, 1H), 2.18 (s, 3H), 1.92-1.83 (m, 1H), 1.81- 1.70 (m, 1H), 1.65-1.56 (m, 1H), 1.53-1.45 (m, 1H), 1.23-1.15 (m, 1H), 0.89 (dd, J = 4.6, 6.8 Hz, 6H).

<sup>13</sup>C NMR (101 MHz, CDCl<sub>3</sub>)  $\delta$  143.1, 140.8, 128.7, 128.5, 128.3, 128.1, 126.6, 125.6, 59.8, 57.8, 38.8, 36.3, 33.5, 32.2, 25.1, 23.0, 22.9.

IR (film, cm<sup>-1</sup>): 2956, 2928, 1456, 731, 698.

HRMS: m/z calcd for C<sub>21</sub>H<sub>29</sub>N [M+H]<sup>+</sup> 296.2373; found 296.2378.

### N-benzyl-N-methyl-1-phenylpentan-3-amine-4,4,5,5,5-d<sub>5</sub> (11f)

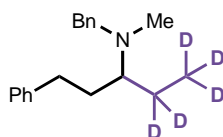

N-benzyl-N-methyl-1-phenylpentan-3-amine-4,4,5,5,5-d<sub>5</sub> was prepared according to General Procedure **G** using Zn (78 mg, 1.2 mmol, 3 equiv), copper iodide (30 mg, 0.16 mmol, 0.4 equiv), N-methylbenzylamine hydrochloride (63 mg, 0.4 mmol, 1.0 equiv), hydrocinnamaldehyde (108  $\mu$ L, 0.8 mmol, 2 equiv), iodoethane-d<sub>5</sub> (96  $\mu$ L, 1.2 mmol, 3 equiv) and TMSOTf (36  $\mu$ L, 0.2 mmol, 0.5 equiv) in *n*BuOAc (1 mL). Crude material was purified by column chromatography (0-10% EtOAc in Pet. Ether) afford the product as a colourless oil (61 mg, 72%).

<sup>1</sup>H NMR (500 MHz, CDCl<sub>3</sub>)  $\delta$  7.41 – 7.26 (m, 6H), 7.20 (sept, J = 7.2 Hz, 4H), 3.61 (d, J = 13.5 Hz, 1H), 3.55 (d, J = 13.5 Hz, 1H), 2.77 (ddd, J = 15.0, 10.3, 5.4 Hz, 1H), 2.65 (ddd, J = 13.7, 10.2, 6.2 Hz, 1H), 2.42 (t, J = 6.8 Hz, 1H), 2.16 (s, 3H), 1.85 – 1.73 (m, 1H), 1.63 (ddt, J = 13.1, 10.2, 6.1 Hz, 1H);

<sup>13</sup>C NMR (126 MHz, CDCl<sub>3</sub>)  $\delta$  143.2, 140.7, 128.7, 128.5, 128.3, 128.2, 126.7, 125.6, 64.0, 59.5, 57.9, 40.5, 36.4, 33.6, 32.0.

<sup>2</sup>H NMR (107 MHz, CDCl<sub>3</sub>)  $\delta$  1.58 (s, 1H), 1.30 (s, 1H), 0.88 (s, 3H).

IR (film, cm<sup>-1</sup>): 3024, 2924, 2853, 2785, 1601, 1493, 1452, 1026, 735, 679

HRMS: m/z calculated for C<sub>19</sub>H<sub>32</sub>D<sub>5</sub>N [M+H]<sup>+</sup> 273.2379; found 273.2376.

### N-benzyl-7-chloro-N-methyl-1-phenylheptan-3-amine (11g)

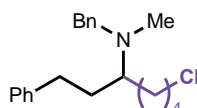

N-benzyl-7-chloro-N-methyl-1-phenylheptan-3-amine was prepared according to General Procedure **E** using Zn (78 mg, 1.2 mmol, 3 equiv), copper iodide (30 mg, 0.16 mmol, 0.4 equiv), N-methylbenzylamine (52  $\mu$ L, 0.4 mmol, 1.0 equiv), hydrocinnamaldehyde (108  $\mu$ L, 0.8 mmol, 2 equiv), 1-chloro-4-iodobutane (118  $\mu$ L, 1.2 mmol, 3 equiv) and TMSOTf (108  $\mu$ L, 0.6 mmol, 1.5 equiv) in *n*BuOAc (1 mL) with a modification. The reaction mixture was quenched with saturated  $\text{Na}_2\text{CO}_3$  (approx. 20 ml, aq). Crude material mixture was purified by column chromatography (0-40% (10%  $\text{Et}_2\text{O}$ :90% Pet. Ether:  $\text{NEt}_3$  3%) in Pet. Ether), to afford a colourless oil (102 mg, 78%).

*NOTE: This product cyclises to the quaternary ammonium in under 1 hour in  $\text{CDCl}_3$  and continues to convert in solution. Compound should be stored as HCl salt before further use.*

**$^1\text{H}$  NMR** (400 MHz,  $\text{CDCl}_3$ )  $\delta$  7.40 – 7.20 (m, 10H), 3.61 (s, 2H), 3.58 (t,  $J = 6.7$  Hz, 2H), 2.83 – 2.66 (m, 2H), 2.56 (quint,  $J = 6.6$  Hz, 1H), 2.21 (s, 3H), 1.96-1.85 (m, 1H), 1.79 (quint,  $J = 7.0$  Hz, 2H), 1.70- 1.59 (m, 2H), 1.58-1.48 (m, 2H), 1.44-1.33 (m, 1H).

**$^{13}\text{C}$  NMR** (101 MHz,  $\text{CDCl}_3$ )  $\delta$  142.9, 140.5, 128.6, 128.42, 128.36, 128.2, 126.7, 125.7, 61.8, 57.9, 45.1, 36.3, 33.5, 32.8, 32.0, 28.8, 24.5.

**IR** ( $\text{CDCl}_3$  solution,  $\text{cm}^{-1}$ ): 3097, 3040, 2938, 1609, 1500, 1459, 1033, 760, 704, 542.

**HRMS**:  $m/z$  calcd for  $\text{C}_{21}\text{H}_{28}\text{NCl}$   $[\text{M}+\text{H}]^+$  330.1983; found 330.1987.

### 1-(1-phenylpentan-2-yl)pyrrolidine (Prolitane) (11h)

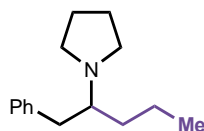

1-(1-phenylpentan-2-yl)pyrrolidine (Prolitane) was prepared according to General Procedure **E** using Zn (392 mg, 6 mmol, 3 equiv), copper iodide (152 mg, 0.8 mmol, 0.4 equiv), pyrrolidine (164  $\mu$ L, 2 mmol, 1.0 equiv), phenylacetaldehyde (481 mg, 4.0 mmol, 2 equiv), 1-iodopropane (582  $\mu$ L, 6 mmol, 3 equiv) and TMSOTf (543  $\mu$ L, 3 mmol, 1.5 equiv) in *n*BuOAc (5 mL). The crude material was filtered through an SCX-column (eluting with 5N  $\text{NH}_3$  in MeOH) then purified by reverse phase column chromatography (20-100% MeCN in  $\text{H}_2\text{O}$ ) to afford the product as a colourless oil (395 mg, 93%). Characterisation matched previous data.<sup>5</sup>

**$^1\text{H}$  NMR** (500 MHz,  $\text{CDCl}_3$ )  $\delta$  7.33 – 7.27 (m, 2H), 7.25 – 7.19 (m, 3H), 3.01 (q,  $J = 8.5$  Hz, 1H), 2.77 – 2.68 (m, 2H), 2.68 – 2.54 (m, 4H), 1.88 – 1.72 (m, 4H), 1.47 – 1.38 (m, 3H), 1.38 – 1.26 (m, 1H), 0.85 (t,  $J = 7.0$  Hz, 2H).

**$^{13}\text{C}$  NMR** (126 MHz,  $\text{CDCl}_3$ )  $\delta$  140.9, 129.3, 128.2, 125.7, 64.4, 50.6, 37.6, 33.8, 23.6, 18.5, 14.4.

**IR** (film,  $\text{cm}^{-1}$ ): 2955, 2929, 2870, 1493, 1453, 1376, 1352, 1131, 1030, 735, 698.

**HRMS**:  $m/z$  calculated for  $\text{C}_{30}\text{H}_{32}\text{N}$   $[\text{M}+\text{H}]^+$  218.1908; found 218.1907.

### N-Benzyl-N-methyl-1-phenyl-2-methylpropan-1-amine (12a)

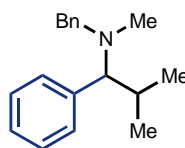

N-Benzyl-N-methyl-1-phenyl-2-methylpropan-1-amine was prepared according to General Procedure **E** using Zn (78 mg, 1.2 mmol, 3 equiv), copper iodide (30 mg, 0.16 mmol, 0.4 equiv), N-methylbenzylamine (52  $\mu$ L, 0.4 mmol, 1.0 equiv), benzaldehyde (82  $\mu$ L, 0.8 mmol, 2 equiv), 2-iodopropane (160 mL, 1.6 mmol, 4 equiv) and TMSOTf (108  $\mu$ L, 0.6 mmol, 1.5 equiv) in *n*BuOAc (1 mL). Crude material was purified by acid-base wash according to General Procedure **ABW** to afford the product as a colourless oil (92 mg, 91%).

$^1\text{H NMR}$  (400 MHz,  $\text{CDCl}_3$ )  $\delta$  7.44-7.39 (m, 4H), 7.39-7.29 (m, 4H), 7.25-7.21 (m, 2H), 3.57 (d,  $J$  = 13.5 Hz, 1H), 3.30 (d,  $J$  = 13.5 Hz, 1H), 3.22 (d,  $J$  = 9.6 Hz, 1H), 2.40 (m, 1H), 2.12 (s, 3H), 1.20 (d,  $J$  = 6.5 Hz, 3H), 0.79 (d,  $J$  = 6.5 Hz, 3H).

$^{13}\text{C NMR}$  (121 MHz,  $\text{CDCl}_3$ )  $\delta$  140.4, 137.5, 129.4, 128.7, 128.2, 127.7, 126.8, 126.6, 74.7, 58.6, 37.4, 28.6, 20.8, 20.0.

**IR** (film,  $\text{cm}^{-1}$ ): 2954, 2789, 1493, 1451, 1020, 735, 697.

**HRMS**:  $m/z$  calcd for  $[\text{M}+\text{H}]^+$  254.1903, found 254.1903.

### methyl 4-(1-(benzyl(methyl)amino)-2-methylpropyl)benzoate (12b)

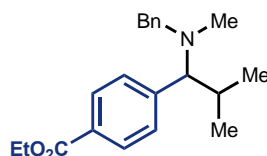

methyl 4-(1-(benzyl(methyl)amino)-2-methylpropyl)benzoate was prepared according to General Procedure **E** using Zn (78 mg, 1.2 mmol, 3 equiv), copper iodide (30 mg, 0.16 mmol, 0.4 equiv), N-methylbenzylamine (52  $\mu$ L, 0.4 mmol, 1.0 equiv), methyl 4-formylbenzoate (131 mg, 0.8 mmol, 2 equiv), 2-iodopropane (120 mL, 1.2 mmol, 3 equiv) and TMSOTf (108  $\mu$ L, 0.6 mmol, 1.5 equiv) in *n*BuOAc (1 mL). Crude material was purified by column chromatography (0-10% (90% Pet. Ether: 10%  $\text{Et}_2\text{O}$ : 3%  $\text{NEt}_3$ ) in Pet. Ether) to give the product as a colourless oil (83%, 67%)

$^1\text{H NMR}$  (500 MHz,  $\text{CDCl}_3$ )  $\delta$  8.07 (d,  $J$  = 8.5 Hz, 1H), 7.38- 7.24 (m, 7H), 3.96 (s, 3H), 3.51 (d,  $J$  = 13.7 Hz, 1H), 3.28-3.22 (m, 2H), 2.43 -2.33 (m, 1H), 2.09 (s, 3H), 1.16 (d,  $J$  = 6.5 Hz, 3H), 0.75 (d,  $J$  = 6.5 Hz, 3H)

$^{13}\text{C NMR}$  (126 MHz,  $\text{CDCl}_3$ )  $\delta$  167.2, 143.1, 139.9, 129.3, 129.0, 128.7, 128.6, 128.2, 126.8, 74.3, 58.7, 52.1, 37.4, 28.5, 20.6, 19.7.

**IR** (film,  $\text{cm}^{-1}$ ): 2952, 1720, 1435, 1276, 1103, 1018, 713, 698.

**HRMS**:  $m/z$  calcd for  $[\text{M}+\text{H}]^+$  312.1958, found 312.19610

### N-benzyl-1-(6-bromobenzo[d][1,3]dioxol-5-yl)-N,2-dimethylpropan-1-amine (12c)

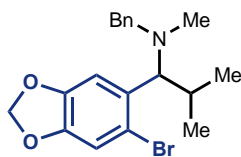

N-benzyl-1-(6-bromobenzo[d][1,3]dioxol-5-yl)-N,2-dimethylpropan-1-amine was prepared according to General Procedure E using Zn (78 mg, 1.2 mmol, 3 equiv), copper iodide (30 mg, 0.16 mmol, 0.4 equiv), N-methylbenzylamine (52  $\mu$ L, 0.4 mmol, 1.0 equiv), 6-bromo-benzo[1,3]dioxole-5-carbaldehyde (183 mg, 0.8 mmol, 2 equiv), 2-iodopropane (120  $\mu$ L, 1.2 mmol, 3 equiv) and TMSOTf (108  $\mu$ L, 0.6 mmol, 1.5 equiv) in *n*BuOAc (1 mL). Crude material was purified by column chromatography (0-10% (90% Pet. Ether: 10% Et<sub>2</sub>O: 3% NEt<sub>3</sub>) in Pet. Ether) to give the product as a colourless oil (50 mg, 33%)

<sup>1</sup>H NMR (500 MHz, CDCl<sub>3</sub>)  $\delta$  7.37 - 7.22 (m, 5H), 6.89 (s, 1H), 7.09 (s, 1H), 3.95 (d, J = 9.2, 1H), 3.55 (d, J = 18.9 Hz, 1H), 3.50 (d, J = 18.9, 1H), 2.29 - 2.19 (m, 1H), 2.10 (s, 3H), 1.19 (d, J = 6.4 Hz, 3H), 0.81 (d, J = 6.2 Hz, 3H)

<sup>13</sup>C NMR (126 MHz, CDCl<sub>3</sub>)  $\delta$  147.1, 146.9, 140.4, 131.6, 128.5, 128.2, 126.6, 116.9, 112.6, 108.6, 101.6, 72.2, 58.0, 37.4, 30.1, 20.5, 19.1.

IR (film, cm<sup>-1</sup>): 2957, 2787, 1473, 1223, 1037, 734, 698.

HRMS: m/z calcd for [M+H]<sup>+</sup> 376.0907, found 376.0908.

### N-benzyl-N,2-dimethyl-1-(1-methyl-1H-pyrazol-4-yl)propan-1-amine (12d)

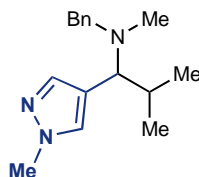

N-benzyl-N,2-dimethyl-1-(1-methyl-1H-pyrazol-4-yl)propan-1-amine was prepared according to General Procedure E with modifications. In 4 mL vial capped with a septa, Zn (78 mg, 1.2 mmol, 3 equiv), 2-iodopropane (120  $\mu$ L, 1.2 mmol, 3 equiv) and TMSOTf (54  $\mu$ L, 0.3 mmol, 0.75 equiv) in *n*BuOAc (0.5 mL) were stirred for 1 hour. At the same time, copper iodide (30 mg, 0.16 mmol, 0.4 equiv), N-methylbenzylamine (52  $\mu$ L, 0.4 mmol, 1.0 equiv), 1-methyl-1H-pyrazole-4-carbaldehyde (77 mg, 0.7 mmol, 1.75 equiv), and TMSOTf (54  $\mu$ L, 0.3 mmol, 0.75 equiv) in *n*BuOAc (0.5 mL) were stirred in a 10 mL microwave vial equipped with a septa cap. After 1 hour, the zinc and alkyl halide mixture was syringed into the other vial with stirring. The rest of the reaction was carried out using General Procedure E. Crude material was purified by column chromatography (0-10% (90% Pet. Ether: 10% Et<sub>2</sub>O: 3% NEt<sub>3</sub>) in Pet. Ether) to give the product as a colourless oil (82 mg, 80%)

<sup>1</sup>H NMR (500 MHz, CDCl<sub>3</sub>)  $\delta$  7.34 (p, J = 7.21, 5H), 7.27 - 7.22 (m, 1H), 7.17 (s, 1H), 3.94 (s, 3H), 3.51 (d, J = 13.4 Hz, 1H), 3.19 (d, J = 13.9 Hz, 1H), 3.14 (d, J = 10.5 Hz, 1H), 2.15 - 2.07 (m, 1H), 2.03 (s, 3H), 1.15 (d, J = 6.5 Hz, 3H), 0.77 (d, J = 6.7 Hz, 3H)

<sup>13</sup>C NMR (126 MHz, CDCl<sub>3</sub>)  $\delta$  140.2, 139.6, 129.2, 128.7, 128.2, 126.6, 117.2, 65.4, 58.5, 38.9, 37.1, 30.1, 20.8, 20.6

IR (film, cm<sup>-1</sup>): 2952, 2789, 1452, 1024, 1014, 985, 732, 697

HRMS: m/z calcd for [M+H]<sup>+</sup> 258.1965, found 258.1967.

### N-benzyl-1-(3,5-dimethylisoxazol-4-yl)-N,2-dimethylpropan-1-amine (12e)

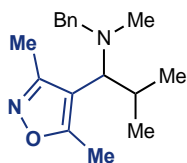

N-benzyl-1-(3,5-dimethylisoxazol-4-yl)-N,2-dimethylpropan-1-amine was prepared according to General Procedure E with modifications. In 4 mL vial capped with a septa, Zn (78 mg, 1.2 mmol, 3 equiv), 2-iodopropane (120  $\mu$ L, 1.2 mmol, 3 equiv) and TMSOTf (54  $\mu$ L, 0.3 mmol, 0.75 equiv) in *n*BuOAc (0.5 mL) were stirred for 1 hour. At the same time, copper iodide (30 mg, 0.16 mmol, 0.4 equiv), N-methylbenzylamine (52  $\mu$ L, 0.4 mmol, 1.0 equiv), 3,5-dimethyl-4-isoxazolecarbaldehyde (88 mg, 0.7 mmol, 1.75 equiv), and TMSOTf (54  $\mu$ L, 0.3 mmol, 0.75 equiv) in *n*BuOAc (0.5 mL) were stirred in a 10 mL microwave vial equipped with a septa cap. After 1 hour, the zinc and alkyl halide mixture was syringed into the other vial with stirring. The rest of the reaction was carried out using General Procedure E. Crude material was purified by column chromatography (0-10% (90% Pet. Ether: 10% Et<sub>2</sub>O: 3% NEt<sub>3</sub>) in Pet. Ether) to give the product as a colourless oil (61 mg, 56%)

**<sup>1</sup>H NMR** (400 MHz, CDCl<sub>3</sub>)  $\delta$  7.36 - 7.30 (m, 1H), 7.30 - 7.23 (m, 1H), 3.54 (d, J = 13.8 Hz, 1H), 3.37 (d, J = 13.3 Hz, 1H), 3.15 (d, J = 9.1 Hz, 1H), 2.44 (s, 3H), 2.42 - 2.34 (m, 1H), 2.23 (s, 3H), 2.06 (s, 3H), 1.14 (d, J = 6.5 Hz, 3H), 0.81 (d, J = 6.6 Hz, 3H)

**<sup>13</sup>C NMR** (101 MHz, CDCl<sub>3</sub>)  $\delta$  166.7, 160.2, 139.6, 128.5, 128.3, 126.9, 110.6, 65.9, 58.9, 38.2, 28.9, 21.0, 19.4, 12.8, 12.0

**IR** (film, cm<sup>-1</sup>): 2958, 2785, 1452, 1416, 1024, 737, 698

**HRMS**: m/z calcd for [M+H]<sup>+</sup> 273.1961, found 273.1964.



### N-benzyl-1-(6-bromopyridin-2-yl)-N,2-dimethylpropan-1-amine (12f)

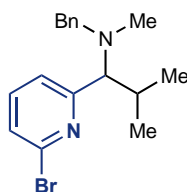

N-benzyl-1-(6-bromopyridin-2-yl)-N,2-dimethylpropan-1-amine was prepared according to General Procedure E with modifications. In 4 mL vial capped with a septa, Zn (78 mg, 1.2 mmol, 3 equiv), 2-iodopropane (120  $\mu$ L, 1.2 mmol, 3 equiv) and TMSOTf (54  $\mu$ L, 0.3 mmol, 0.75 equiv) in *n*BuOAc (0.5 mL) were stirred for 1 hour. At the same time, copper iodide (30 mg, 0.16 mmol, 0.4 equiv), N-methylbenzylamine (52  $\mu$ L, 0.4 mmol, 1.0 equiv), 6-bromopyridine-2-carboxaldehyde (149 mg, 0.8 mmol, 1.75 equiv), and TMSOTf (54  $\mu$ L, 0.3 mmol, 0.75 equiv) in *n*BuOAc (0.5 mL) were stirred in a 10 mL microwave vial equipped with a septa cap. After 1 hour, the zinc and alkyl halide mixture was syringed into the other vial with stirring. The rest of the reaction was carried out using General Procedure E. Crude material was purified by column chromatography (0-10% (90% Pet. Ether: 10% Et<sub>2</sub>O: 3% NEt<sub>3</sub>) in Pet. Ether) to give the product as a colourless oil (55 mg, 41%)

**<sup>1</sup>H NMR** (500 MHz, CDCl<sub>3</sub>)  $\delta$  7.53 (t, J = 7.7 Hz, 1H), 7.39 (dd, J = 7.9, 0.9 Hz, 1H), 7.37 - 7.31 (m, 4H), 7.25 (tt, J = 7.0, 1.6 Hz, 1H), 7.10 (dd, J = 7.5, 0.8 Hz, 1H), 3.61 (d, J = 13.7 Hz, 1H), 3.37 - 3.30 (m, 2H), 2.53 - 2.43 (m, 1H), 2.13 (s, 3H), 1.17 (d, J = 6.7 Hz, 3H), 0.73 (d, J = 6.6 Hz, 3H)

**<sup>13</sup>C NMR** (126 MHz, CDCl<sub>3</sub>)  $\delta$  160.5, 141.4, 140.1, 137.7, 128.6, 126.7, 126.0, 122.5, 74.9, 58.4, 37.5, 28.2, 20.2, 20.0

**IR** (film, cm<sup>-1</sup>): 2956, 2869, 2793, 1575, 1551, 1429, 1108, 1024, 791, 735, 696

**HRMS**: m/z calcd for [M+H]<sup>+</sup> 333.0961, found 333.0967.

## N-benzyl-1-(3-(4-bromophenyl)isoxazol-5-yl)-N,2-dimethylpropan-1-amine (12g)

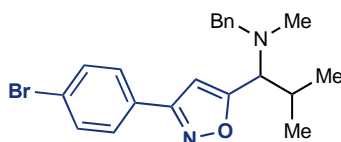

N-benzyl-1-(3-(4-bromophenyl)isoxazol-5-yl)-N,2-dimethylpropan-1-amine was prepared according to General Procedure **E** with modifications. In 4 mL vial capped with a septa, Zn (78 mg, 1.2 mmol, 3 equiv), 2-iodopropane (120  $\mu$ L, 1.2 mmol, 3 equiv) and TMSOTf (54  $\mu$ L, 0.3 mmol, 0.75 equiv) in *n*BuOAc (0.5 mL) were stirred for 1 hour. At the same time, copper iodide (30 mg, 0.16 mmol, 0.4 equiv), N-methylbenzylamine (52  $\mu$ L, 0.4 mmol, 1.0 equiv), 3-(4-bromophenyl)isoxazole-5-carboxaldehyde (202 mg, 0.8 mmol, 1.75 equiv), and TMSOTf (54  $\mu$ L, 0.3 mmol, 0.75 equiv) in *n*BuOAc (0.5 mL) were stirred in a 10 mL microwave vial equipped with a septa cap. After 1 hour, the zinc and alkyl halide mixture was syringed into the other vial with stirring. The rest of the reaction was carried out using General Procedure **E**. Crude material was purified by column chromatography (0-10% (90% Pet. Ether: 10% Et<sub>2</sub>O: 3% NEt<sub>3</sub>) in Pet. Ether) to give the product as a colourless oil (125 mg, 78%)

**<sup>1</sup>H NMR** (500 MHz, CDCl<sub>3</sub>)  $\delta$  7.77 - 7.74 (m, 2H), 7.65 - 7.62 (m, 2H), 7.41 - 7.33 (m, 4H), 7.31 - 7.26 (m, 1H), 6.36 (s, 1H), 3.68 (d, J = 13.6 Hz, 1H), 3.47 (d, J = 10.7 Hz, 1H), 3.40 (d, J = 13.5 Hz, 1H), 2.40 - 2.29 (m, 1H), 2.20 (s, 3H), 1.21 (d, J = 6.5 Hz, 3H), 0.85 (d, J = 6.5 Hz, 3H)

**<sup>13</sup>C NMR** (126 MHz, CDCl<sub>3</sub>)  $\delta$  171.9, 160.9, 139.3, 132.2, 128.4 - 128.3 (m) 127.0, 124.2, 100.6, 66.3, 58.9, 37.5, 28.8, 20.4, 20.1

**IR** (film, cm<sup>-1</sup>): 2959, 1426, 1072, 1024, 1011, 833, 736, 697

**HRMS**: *m/z* calcd for [M+H]<sup>+</sup> 399.1067, found 399.1050.

**(4-(2-methyl-1-phenylpropyl)piperazin-1-yl)(naphthalen-2-yl)methanone (14a) 0.4 mmol reaction**

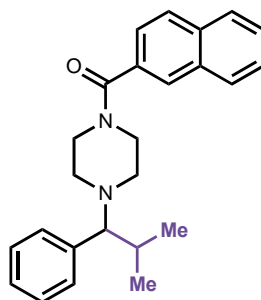

(4-(2-methyl-1-phenylpropyl)piperazin-1-yl)(naphthalen-2-yl)methanone was prepared according to General Procedure E using Zn (78 mg, 1.2 mmol, 3 equiv), copper iodide (30 mg, 0.16 mmol, 0.16 equiv), naphthalen-2-yl(piperazin-1-yl)methanone (prepared according to *Waldman et al.*)<sup>6</sup> (96 mg, 0.4 mmol, 1.0 equiv), benzaldehyde (82  $\mu$ L, 0.8 mmol, 2 equiv), 2-iodopropane (160  $\mu$ L, 1.6 mmol, 4 equiv) and TMSOTf (108  $\mu$ L, 0.6 mmol, 1.5 equiv) in *n*BuOAc (1 mL). Crude material was purified by column chromatography (0-10% EtOAc in Pet. Ether) to give the product as a colourless oil (102 mg, 68%).

**<sup>1</sup>H NMR** (500 MHz, CDCl<sub>3</sub>)  $\delta$  7.88-7.83 (m, 4H), 7.56-7.51 (m, 2H), 7.43 (dd, J = 8.4, 1.4 Hz, 1H), 7.37-7.38-7.32 (m, 2H), 7.32-7.28 (m, 1H), 7.16-7.12 (m, 1H), 3.83 (bd, 2H), 3.47 (bs, 2H), 3.08 (d, J = 8.93, 1H), 2.64- 2.21 (m, 5H), 1.04 (d, J = 6.9 Hz, 3H), 0.76 (d, J = 6.5 Hz, 3H).

**<sup>13</sup>C NMR** (126 MHz, CDCl<sub>3</sub>)  $\delta$  170.1, 137.2, 133.6, 133.3, 132.7, 129.2, 128.24, 128.2, 127.82, 127.77, 127.1, 127.0, 126.9, 126.6, 124.4, 76.2, 49.3 (t, J = 123.8 Hz), 42.6, 27.8, 20.6, 19.1.

**IR** (film, cm<sup>-1</sup>): 2916, 2828, 1621, 1422, 1236, 1006, 998, 756, 712.

**HRMS**: m/z calcd for C<sub>25</sub>H<sub>28</sub>N<sub>2</sub>O [M+H]<sup>+</sup> 373.2274, found 373.2274.

**Scaleup: (4-(2-methyl-1-phenylpropyl)piperazin-1-yl)(naphthalen-2-yl)methanone (14a)  
4 mmol reaction**

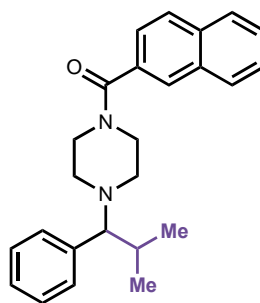

(4-(2-methyl-1-phenylpropyl)piperazin-1-yl)(naphthalen-2-yl)methanone was prepared according to General Procedure E using Zn (785 mg, 12 mmol, 3 equiv), copper iodide (305 mg, 1.6 mmol, 0.4 equiv), naphthalen-2-yl(piperazin-1-yl)methanone (prepared according to *Waldman et al.*)<sup>6</sup> (961 mg, 4 mmol, 1.0 equiv), benzaldehyde (816  $\mu$ L, 8 mmol, 2 equiv), 2-iodopropane (1.6 mL, 16 mmol, 4 equiv) and TMSOTf (1.1 mL, 6 mmol, 1.5 equiv) in *n*BuOAc (10 mL) with modifications. The reaction was performed in 100 mL schlenk flask which was sealed off from nitrogen after vacuum backfills. The TMSOTf was added dropwise over 2 minutes, avoiding the reaction mixture refluxing. The crude material was purified by column chromatography (0-10% EtOAc in Pet. Ether) to give the product as a colourless oil which solidified upon standing to a white solid (1.2 g, 80%). Data inline with 0.4 mmol reaction.

## 7.3 Tertiary Alkyl Halide Optimization

### 7.3.1 Standard reaction condition controls.

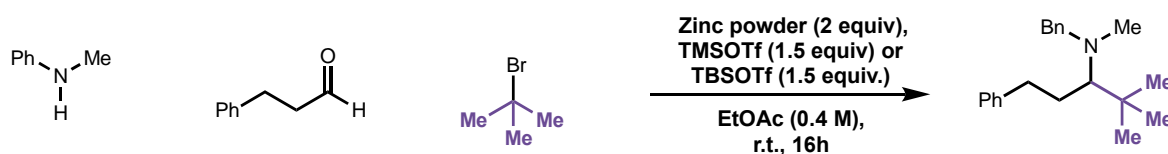

The synthesis of N-benzyl-N,4,4-trimethyl-1-phenylpentan-3-amine was attempted according to General Procedure **B** using Zn (52 mg, 0.8 mmol, 2 equiv), N-methylbenzylamine (52  $\mu$ L, 0.4 mmol, 1 equiv), hydrocinnamaldehyde (106  $\mu$ L, 0.8 mmol, 2 equiv), tertbutyliodide (143  $\mu$ L, 1.2 mmol, 3 equiv) and TMSOTf (106  $\mu$ L, 0.6 mmol, 1.5 equiv) or TBSOTf (137  $\mu$ L, 0.6 mmol, 1.5 equiv) in EtOAc (1 mL). Yield of the product was determined by  $^1\text{H}$  NMR using 1,1,2,2-tetrachloroethane as internal standard.

| Exp | Lewis Acid | Assay Yield / % |
|-----|------------|-----------------|
| A   | TMSOTf     | 30              |
| B   | TBSOTf     | 34              |

### 7.3.2 CuI-assisted reaction condition controls.

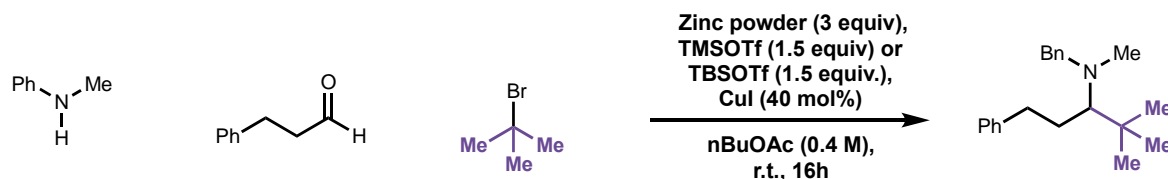

The synthesis of N-benzyl-N,4,4-trimethyl-1-phenylpentan-3-amine was attempted according to General Procedure **E** using Zn (78 mg, 1.2 mmol, 3 equiv), copper iodide (30 mg, 0.16 mmol, 0.4 equiv), N-methylbenzylamine (52  $\mu$ L, 0.4 mmol, 1 equiv), hydrocinnamaldehyde (108  $\mu$ L, 0.8 mmol, 2 equiv), tert-butyl bromide (180  $\mu$ L, 1.26 mmol, 4 equiv), and TMSOTf (106  $\mu$ L, 0.6 mmol, 1.5 equiv) or TBSOTf (137  $\mu$ L, 0.6 mmol, 1.5 equiv) in *n*BuOAc (1 mL). Yield of the product was determined by  $^1\text{H}$  NMR using 1,1,2,2-tetrachloroethane as internal standard.

| Exp | Lewis Acid | Assay Yield / % |
|-----|------------|-----------------|
| A   | TMSOTf     | 38              |
| B   | TBSOTf     | 38              |

### 7.3.3 TMSOTf and copper iodide optimisation screening

*Note: optimisation was performed using tert-butyl bromide as the reagent displayed better stability than tert-butyl iodide.*

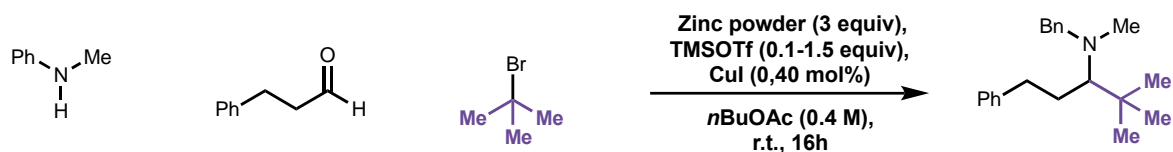

An oven dried vial (Biotage Microwave Process Vial (10 mL), equipped with gas-tight pierceable caps) was charged with a stirring bar, Zn dust (78 mg, 1.2 mmol, 3 equiv) and copper iodide (0-40 mol%). The vial was sealed, evacuated, and backfilled with N<sub>2</sub>. To this was added 1.0 ml nBuOAc, followed by the N-methylbenzylamine (52 μL, 0.4 mmol, 1.0 equiv), the hydrocinnamaldehyde (100 μL, 0.75 mmol, 1.9 equiv). The mixture was stirred for 15 minutes then, whilst stirring, tert-butyl bromide (180 μL, 1.6 mmol, 4 equiv) and TMSOTf (0.1-1.5 equiv) was added. The reaction mixture was stirred overnight. The reaction mixture was worked up according to general procedure E and yields were determined by <sup>1</sup>H NMR using 1,1,2,2-tetrachloroethane as internal standard.

| Exp | TMSOTf loading / equiv | Additive                | Assay Yield /% |
|-----|------------------------|-------------------------|----------------|
| A   | 1.5                    | copper iodide (40 mol%) | 18             |
| B   | 1.0                    | copper iodide (40 mol%) | 21             |
| C   | 0.5                    | copper iodide (40 mol%) | 57             |
| D   | 0.1                    | copper iodide (40 mol%) | 86             |
| E   | 0.1                    | none                    | 41             |

## From Iodide

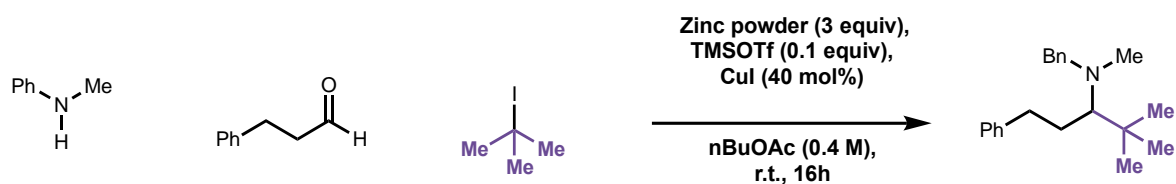

The synthesis of N-benzyl-N,4,4-trimethyl-1-phenylpentan-3-amine was attempted according to General Procedure E (with modifications) using zinc (78 mg, 1.2 mmol, 3 equiv), copper iodide (30 mg, 0.16 mmol, 40 mol%), N-methylbenzylamine (52  $\mu$ L, 0.4 mmol, 1.0 equiv), hydrocinamaldehyde (100  $\mu$ L, 0.75 mmol, 1.9 equiv), tertbutyliodide (160  $\mu$ L, 1.6 mmol, 4 equiv) and TMSOTf (7  $\mu$ L, 0.04 mmol, 10 mol%) in *n*BuOAc (1 mL). The reaction mixture was stirred overnight. The reaction mixture was worked up according to general procedure E. Yield of the product was determined by  $^1\text{H}$  NMR using 1,1,2,2-tetrachloroethane as internal standard indicating a quantitative yield based on the diastereotopic benzyl peak at 3.99 ppm (spectrum shown below).

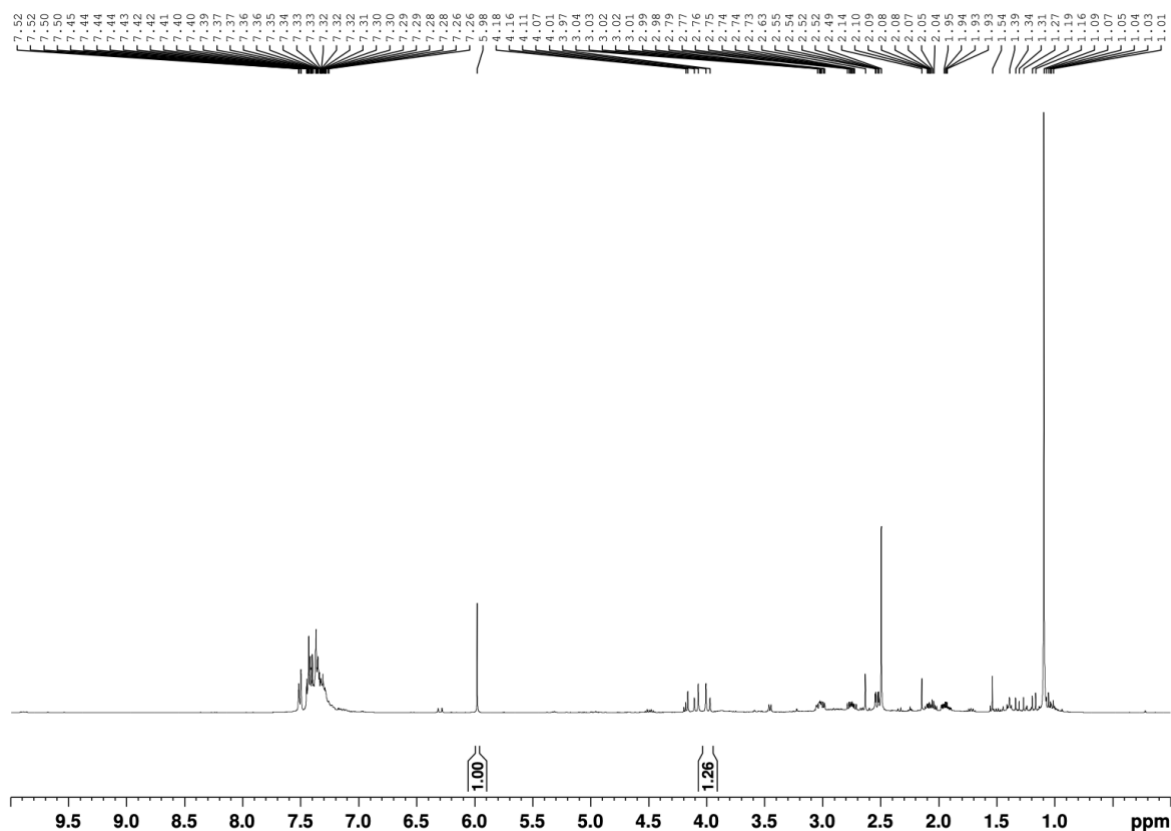

### From Bromide - N-benzyl-N,4,4-trimethyl-1-phenylpentan-3-amine (10o)

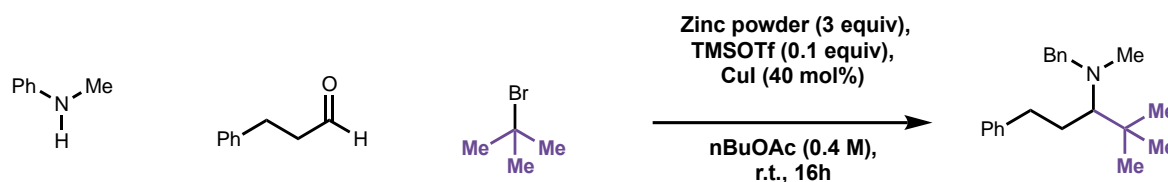

The synthesis of N-benzyl-N,4,4-trimethyl-1-phenylpentan-3-amine was performed according to General Procedure E (with modifications) using zinc (78 mg, 1.2 mmol, 3 equiv), copper iodide (30 mg, 0.16 mmol, 40 mol%), N-methylbenzylamine (52  $\mu$ L, 0.4 mmol, 1.0 equiv), hydrocinnamaldehyde (100  $\mu$ L, 0.75 mmol, 1.9 equiv), tertbutylbromide (180  $\mu$ L, 1.6 mmol, 4 equiv) and TMSOTf (7  $\mu$ L, 0.04 mmol, 10 mol%) in *n*BuOAc (1 mL). The reaction mixture was stirred overnight. The reaction mixture was worked up according to general procedure E. Crude material was purified by column chromatography (0-10% (10% Et<sub>2</sub>O:90% Pet. Ether: NEt<sub>3</sub> 3%) in Pet. Ether), yielding the product as a colourless oil (77 mg, 63%). Characterisation agreed with reported data.<sup>1</sup>

### From Chloride

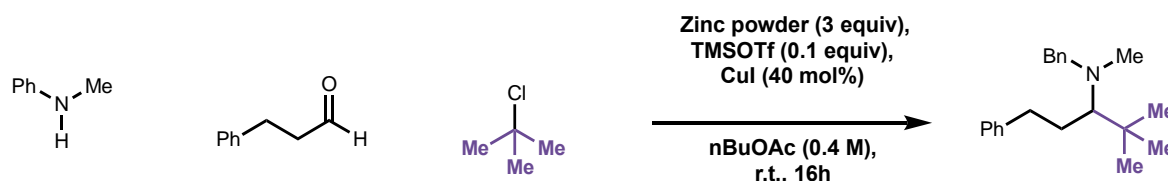

The synthesis of N-benzyl-N,4,4-trimethyl-1-phenylpentan-3-amine was attempted according to General Procedure E (with modifications) using zinc (78 mg, 1.2 mmol, 3 equiv), copper iodide (30 mg, 0.16 mmol, 40 mol%), N-methylbenzylamine (52  $\mu$ L, 0.4 mmol, 1.0 equiv), hydrocinnamaldehyde (100  $\mu$ L, 0.75 mmol, 1.9 equiv), tertbutylchloride (174  $\mu$ L, 1.6 mmol, 4 equiv) and TMSOTf (7  $\mu$ L, 0.04 mmol, 10 mol%) in *n*BuOAc (1 mL). The reaction mixture was stirred overnight. The reaction mixture was worked up according to general procedure B and analysed by <sup>1</sup>H NMR using 1,1,2,2-tetrachloroethane as internal standard indicating a 0% yield.



## 8. Redox-active esters as alkylating feedstocks

### 8.1 General procedure F (Synthesis of redox-active esters)

DMAP (0.1 equiv) and N-hydroxytetrachlorophthalimide (1 equiv) were dissolved in dichloromethane (0.2 M). The carboxylic acid (1 equiv) and DCC (1 equiv) or DIC (1 equiv) were added. The reaction was stirred at rt overnight. The solid that was precipitated was filtered through celite. The solvent in the filtrate was removed *in vacuo*. The product was purified by column chromatography.

*It should be noted that some of the redox-active esters, especially those bearing an electron-withdrawing group at the  $\alpha$ -position, are not stable on silica gel, and they should be eluted from the column as quickly as possible. As redox-active esters are prone to hydrolysis, their molecular weight cannot be detected in LC-MS.*

### 8.2 Redox active ester characterisation

#### 4,5,6,7-tetrachloro-1,3-dioxoisindolin-2-yl propionate (15a)

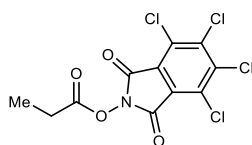

4,5,6,7-tetrachloro-1,3-dioxoisindolin-2-yl propionate was prepared according to General Procedure F using propionic acid (224  $\mu$ L, 3 mmol, 1 equiv), DMAP (37 mg, 0.3 mmol, 0.1 equiv), N-hydroxytetrachlorophthalimide (903 mg, 3 mmol, 1 equiv) and DIC (0.47 mL, 3 mmol, 1 equiv) in dichloromethane (15 mL). Crude material was purified by column chromatography (35-50% dichloromethane in Pet. Ether), yielding the product as a white solid (676 mg, 63%). Data was in line with previous characterisation.<sup>7</sup>

#### 4,5,6,7-tetrachloro-1,3-dioxoisindolin-2-yl isobutyrate (15b)

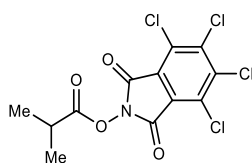

4,5,6,7-tetrachloro-1,3-dioxoisindolin-2-yl isobutyrate was prepared according to General Procedure F using isobutyric acid (556  $\mu$ L, 6 mmol, 1 equiv), DMAP (73 mg, 0.6 mmol, 0.1 equiv), N-hydroxytetrachlorophthalimide (1.8 g, 6 mmol, 1 equiv), and DIC (0.93 mL, 6 mmol, 1 equiv) in dichloromethane (30 mL). Crude material was purified by column chromatography (35-50% dichloromethane in Pet. Ether), yielding the product as a white solid (1.86 g, 84%). Data was in line with previous characterisation.<sup>8</sup>

#### 4,5,6,7-tetrachloro-1,3-dioxoisindolin-2-yl pivalate (15c)

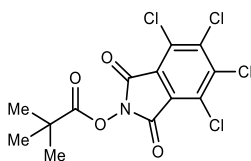

4,5,6,7-tetrachloro-1,3-dioxoisindolin-2-yl pivalate was prepared according to General Procedure **F** using pivalic acid (303 mg, 3 mmol, 1 equiv), DMAP (37 mg, 0.3 mmol, 0.1 equiv), *N*-hydroxytetrachlorophthalimide (903 mg, 3 mmol, 1 equiv) and DCC (619 mg, 3 mmol, 1 equiv) in dichloromethane (15 mL). Crude material was purified by column chromatography (70-80% dichloromethane in Pet. Ether), yielding the product as a white solid (937 mg, 82%).

**mp:** 146-152°C

**<sup>1</sup>H NMR** (400 MHz, CDCl<sub>3</sub>): δ 1.43 (s, 9H).

**<sup>13</sup>C NMR** (101 MHz, CDCl<sub>3</sub>): δ 174.0, 157.9, 141.1, 130.7, 125.0, 38.6, 27.1.

**IR** (solid, cm<sup>-1</sup>): 2987, 2976, 1736, 1379, 1364, 1353, 1155, 1053, 1007, 851, 791, 723, 698.

*HRMS (ESI-TOF) compound unstable*

#### 4,5,6,7-tetrachloro-1,3-dioxoisindolin-2-yl acetate (15d)

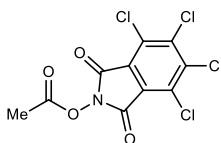

4,5,6,7-tetrachloro-1,3-dioxoisindolin-2-yl acetate was prepared according to General Procedure **F** using acetic acid (0.17 mL, 3 mmol, 1 equiv), DMAP (37 mg, 0.3 mmol, 0.1 equiv), *N*-hydroxytetrachlorophthalimide (903 mg, 3 mmol, 1 equiv) and DIC (0.47 mL, 3 mmol, 1 equiv) in dichloromethane (15 mL). Crude material was purified by column chromatography (75-85% dichloromethane in Pet. Ether), yielding the product as a white solid (863 mg, 84%).

**mp:** 160-168°C

**<sup>1</sup>H NMR** (400 MHz, CDCl<sub>3</sub>): δ 2.41 (s, 3H).

**<sup>13</sup>C NMR** (101 MHz, CDCl<sub>3</sub>): δ 166.3, 157.7, 141.2, 130.7, 124.9, 17.7.

**IR** (solid, cm<sup>-1</sup>): 2945, 1819, 1795, 1745, 1379, 1363, 1300, 1198, 1154, 1036, 730.

*HRMS (ESI-TOF) compound unstable*

#### 4,5,6,7-tetrachloro-1,3-dioxisoindolin-2-yl 1-methylcyclopropane-1-carboxylate (15e)

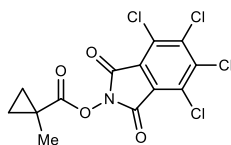

4,5,6,7-tetrachloro-1,3-dioxisoindolin-2-yl 1-methylcyclopropane-1-carboxylate was prepared according to General Procedure F using 1-methylcyclopropanecarboxylic acid (300 mg, 3 mmol, 1 equiv), DMAP (37 mg, 0.3 mmol, 0.1 equiv), N-hydroxytetrachlorophthalimide (903 mg, 3 mmol, 1 equiv), and DIC (0.47 mL, 3 mmol, 1 equiv) in dichloromethane (15 mL). Crude material was purified by column chromatography (30-40% dichloromethane in Pet. Ether), yielding the product as a white solid (937 mg, 84%). Data was in line with previous characterisation.<sup>9</sup>

#### 4,5,6,7-tetrachloro-1,3-dioxisoindolin-2-yl cyclobutanecarboxylate (15f)

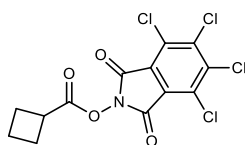

4,5,6,7-tetrachloro-1,3-dioxisoindolin-2-yl cyclobutanecarboxylate was prepared according to General Procedure F using cyclobutanecarboxylic acid (287  $\mu$ L, 3 mmol, 1 equiv), DMAP (37 mg, 0.3 mmol, 0.1 equiv), N-hydroxytetrachlorophthalimide (903 mg, 3 mmol, 1 equiv) and DIC (0.47 mL, 3 mmol, 1 equiv) in dichloromethane (15 mL). Crude material was purified by column chromatography (30-40% dichloromethane in Pet. Ether) yielding the product as a white solid (906 mg, 79%). Data was in line with previous characterisation.<sup>10</sup>

#### 4,5,6,7-tetrachloro-1,3-dioxisoindolin-2-yl 3-methyloxetane-3-carboxylate (15g)

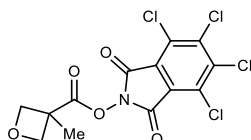

4,5,6,7-tetrachloro-1,3-dioxisoindolin-2-yl 3-methyloxetane-3-carboxylate. was prepared according to General Procedure F using 3-methyloxetane-3-carboxylic acid (348 mg, 3 mmol, 1 equiv), DMAP (37 mg, 0.3 mmol, 0.1 equiv), N-hydroxytetrachlorophthalimide (903 mg, 3 mmol, 1 equiv) and DIC (0.47 mL, 3 mmol, 1 equiv) in dichloromethane (15 mL). Crude material was purified by column chromatography (70-100% dichloromethane in Pet. Ether), yielding the product as a white solid (620 mg, 52%). Data was in line with previous characterisation.<sup>9</sup>

#### 4,5,6,7-tetrachloro-1,3-dioxoisindolin-2-yl 4-methyltetrahydro-2H-pyran-4-carboxylate (15h)

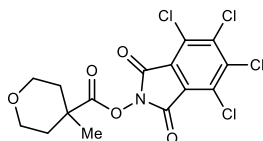

4,5,6,7-tetrachloro-1,3-dioxoisindolin-2-yl 4-methyltetrahydro-2H-pyran-4-carboxylate was prepared according to General Procedure F using 4-methyltetrahydro-2H-pyran-4-carboxylic acid (433 mg, 3 mmol, 1 equiv), DMAP (37 mg, 0.3 mmol, 0.1 equiv), N-hydroxytetrachlorophthalimide (903 mg, 3 mmol, 1 equiv) and DIC (0.47 mL, 3 mmol, 1 equiv) in dichloromethane (15 mL). Crude material was purified by column chromatography (70-95% dichloromethane in Pet. Ether), yielding the product as a white solid (1.1 g, 82%). Data was in line with previous characterisation.<sup>11</sup>

#### 4,5,6,7-tetrachloro-1,3-dioxoisindolin-2-yl cycloheptanecarboxylate (15i)

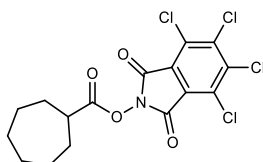

4,5,6,7-tetrachloro-1,3-dioxoisindolin-2-yl cycloheptanecarboxylate was prepared according to General Procedure F using cycloheptanecarboxylic acid (0.41 mL, 3 mmol, 1 equiv), DMAP (37 mg, 0.3 mmol, 0.1 equiv), N-hydroxytetrachlorophthalimide (903 mg, 3 mmol, 1 equiv) and DIC (0.47 mL, 3 mmol, 1 equiv) in dichloromethane (15 mL). The crude product was purified by column chromatography (50% dichloromethane in Pet. Ether), yielding the product as a white solid (1.0 g, 80%).

**<sup>1</sup>H NMR** (400 MHz, CDCl<sub>3</sub>): δ 2.93-2.85 (m, 1H), 2.16 - 2.06 (m, 2H), 1.92-1.74 (m, 4H), 1.66 - 1.50 (m, 6H).

**<sup>13</sup>C NMR** (101 MHz, CDCl<sub>3</sub>): δ 172.5, 158.0, 141.1, 130.6, 125.0, 42.2, 30.8, 28.4, 26.3.

**IR** (solid, cm<sup>-1</sup>): 2926, 2857, 1815, 1789, 1743, 1461, 1378, 1366, 1298, 1197, 1154, 1076, 1036, 993, 958, 934, 858, 794, 729, 691.

**HRMS**: m/z calcd for C<sub>8</sub>H<sub>14</sub>O<sub>2</sub> [M-C<sub>8</sub>HCl<sub>4</sub>NO<sub>2</sub>]<sup>-</sup> 141.0921; found 141.0915.

#### 4,5,6,7-tetrachloro-1,3-dioxoisindolin-2-yl 3-oxocyclobutane-1-carboxylate (15j)

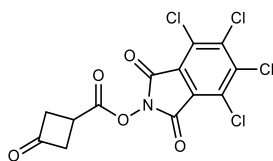

4,5,6,7-tetrachloro-1,3-dioxoisindolin-2-yl 3-oxocyclobutane-1-carboxylate was prepared according to General Procedure F using 3-oxocyclobutane-1-carboxylic acid (342 mg, 3 mmol, 1 equiv), DMAP (37 mg, 0.3 mmol, 0.1 equiv), N-hydroxytetrachlorophthalimide (903 mg, 3 mmol, 1 equiv) and DIC (0.47 mL, 3 mmol, 1 equiv) in dichloromethane (15 mL). After recrystallization in dichloromethane/*i*PrOH at -20 °C overnight and subsequent column chromatography (dichloromethane), the product was obtained as a white solid (580 mg, 49%).

**mp:** 168-176°C

**<sup>1</sup>H NMR** (400 MHz, CDCl<sub>3</sub>): δ 3.70 - 3.45 (m, 5H).

**<sup>13</sup>C NMR** (101 MHz, CDCl<sub>3</sub>): δ 201.0, 170.5, 157.6, 141.5, 130.8, 124.8, 52.4, 25.1.

**IR** (solid, cm<sup>-1</sup>): 2989, 2972, 2939, 1819, 1780, 1741, 1378, 1300, 1200, 1160, 1143, 1123, 1103, 1085, 1033, 959, 859, 808, 794, 787, 728, 685, 613.

*HRMS (ESI-TOF) compound unstable*

#### 4,5,6,7-tetrachloro-1,3-dioxoisindolin-2-yl 3,3-difluorocyclobutane-1-carboxylate (15k)

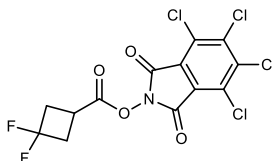

4,5,6,7-tetrachloro-1,3-dioxoisindolin-2-yl 3,3-difluorocyclobutane-1-carboxylate was prepared according to General Procedure F using 3,3-difluoro-cyclobutanecarboxylic acid (408 mg, 3 mmol, 1 equiv), DMAP (37 mg, 0.3 mmol, 0.1 equiv), N-hydroxytetrachlorophthalimide (903 mg, 3 mmol, 1 equiv) and DIC (0.47 mL, 3 mmol, 1 equiv) in dichloromethane (15 mL). Crude material was purified by column chromatography (30-50% dichloromethane in Pet. Ether), yielding the product as a white solid (612 mg, 49%).

**mp:** 156-160°C

**<sup>1</sup>H NMR** (400 MHz, CDCl<sub>3</sub>): δ 3.38 - 3.31 (m, 1H), 3.13 - 2.99 (m, 4H).

**<sup>13</sup>C NMR** (101 MHz, CDCl<sub>3</sub>): δ 169.6 (t, J = 2.9 Hz), 157.3, 141.3, 130.6, 124.6, 117.9 (dd, J = 283.7, 271.2 Hz), 39.3 (t, 25.5 z), 24.2 (dd, J = 14, 6.0 Hz).

**<sup>19</sup>F NMR** (375 MHz, CDCl<sub>3</sub>): δ -83.3 (d, J = 195.6 Hz), -96.0 (d, J = 195.4 Hz).

**IR** (solid, cm<sup>-1</sup>): 2984, 1739, 1300, 1234, 1154, 1105, 1042, 958, 916, 886, 876, 788, 723, 705, 611.

*HRMS (ESI-TOF) compound unstable*

#### 4,5,6,7-tetrachloro-1,3-dioxoisindolin-2-yl 3-methoxypropanoate (15l)

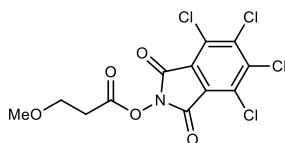

4,5,6,7-tetrachloro-1,3-dioxoisindolin-2-yl 3-methoxypropanoate was prepared according to General Procedure F using 3-methoxypropionic acid (0.28 mL, 3 mmol, 1 equiv), DMAP (37 mg, 0.3 mmol, 0.1 equiv), N-hydroxytetrachlorophthalimide (903 mg, 3 mmol, 1 equiv) and DIC (0.47 mL, 3 mmol, 1 equiv) in dichloromethane (15 mL). Crude material was purified by column chromatography (80-100% dichloromethane in Pet. Ether), yielding the product as a white solid (462 mg, 40%).

$^1\text{H NMR}$  (400 MHz,  $\text{CDCl}_3$ ):  $\delta$  3.78 (t,  $J = 6.3$  Hz, 2H), 3.41 (s, 3H), 2.93 (t,  $J = 6.2$  Hz, 2H).

$^{13}\text{C NMR}$  (101 MHz,  $\text{CDCl}_3$ ):  $\delta$  167.4, 157.6, 141.2, 130.7, 124.9, 67.2, 59.2, 32.2.

**IR** (solid,  $\text{cm}^{-1}$ ): 2977, 2924, 2884, 2846, 2827, 1831, 1796, 1744, 1412, 1397, 1379, 1354, 1300, 1257, 1237, 1188, 1160, 1115, 1084, 1047, 1012, 985, 961, 833, 790, 726, 713, 619.

**HRMS**:  $m/z$  calcd for  $\text{C}_{12}\text{H}_7\text{NO}_5\text{Cl}_4$   $[\text{M}+\text{H}]^+$  407.8971; found 407.8971.

#### 4,5,6,7-tetrachloro-1,3-dioxoisindolin-2-yl 2-(benzyloxy)acetate (15m)

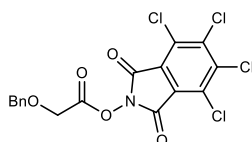

4,5,6,7-tetrachloro-1,3-dioxoisindolin-2-yl 2-(benzyloxy)acetate was prepared according to General Procedure F using benzyloxyacetic acid (0.43 mL, 3 mmol, 1 equiv), DMAP (37 mg, 0.3 mmol, 0.1 equiv), N-hydroxytetrachlorophthalimide (903 mg, 3 mmol, 1 equiv) and DIC (0.47 mL, 3 mmol, 1 equiv) in dichloromethane (15 mL). Crude material was purified by column chromatography (40-70% dichloromethane in Pet. Ether), yielding the product as a white solid (620 mg, 46%). Data was in line with previous characterisation.<sup>8</sup>

#### 4,5,6,7-tetrachloro-1,3-dioxoisindolin-2-yl tetrahydrofuran-2-carboxylate (15n)

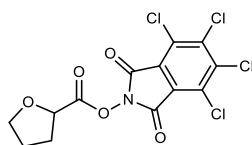

4,5,6,7-tetrachloro-1,3-dioxoisindolin-2-yl tetrahydrofuran-2-carboxylate was prepared according to General Procedure F using tetrahydro-2-furoic acid (287 mL, 3 mmol, 1 equiv), DMAP (37 mg, 0.3 mmol, 0.1 equiv), N-hydroxytetrachlorophthalimide (903 mg, 3 mmol, 1 equiv) and DIC (0.47 mL, 3 mmol, 1 equiv) in dichloromethane (15 mL). Crude material was purified by column chromatography (80-100% dichloromethane in Pet. Ether), yielding the product as a white solid (567 mg, 47%). Data was in line with previous characterisation.<sup>12</sup>

#### 4,5,6,7-Tetrachloro-1,3-dioxoisindolin-2-yl 2-(methylthio)acetate (15l)

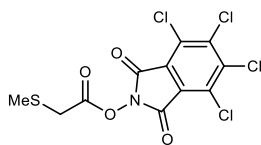

4,5,6,7-tetrachloro-1,3-dioxoisindolin-2-yl 2-(methylthio)acetate was prepared according to General Procedure F using (methylthio)acetic acid (0.26 mL, 3 mmol, 1 equiv), DMAP (37 mg, 0.3 mmol, 0.1 equiv), N-hydroxytetrachlorophthalimide (903 mg, 3 mmol, 1 equiv) and DIC (0.47 mL, 3 mmol, 1 equiv) in dichloromethane (15 mL). Crude material was purified by column chromatography (30-65% dichloromethane in Pet. Ether), yielding the product as a white solid (780 mg, 67%).

**mp:** 146-150°C

**<sup>1</sup>H NMR** (400 MHz, CDCl<sub>3</sub>): δ 3.50 (s, 2H), 2.34 (s, 3H).

**<sup>13</sup>C NMR** (101 MHz, CDCl<sub>3</sub>): δ 166.3, 157.5, 141.4, 130.8, 124.8, 32.5, 16.4.

**IR** (solid, cm<sup>-1</sup>): 2987, 2923, 1814, 1791, 1730, 1367, 1195, 1148, 1072, 1033, 792, 726.

*HRMS (ESI-TOF) compound unstable*

#### 4,5,6,7-Tetrachloro-1,3-dioxoisindolin-2-yl 2-(1,3-dioxoisindolin-2-yl)acetate (15m)

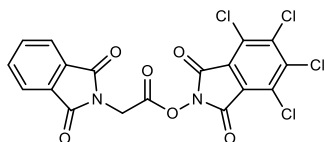

4,5,6,7-Tetrachloro-1,3-dioxoisindolin-2-yl 2-(1,3-dioxoisindolin-2-yl)acetate was prepared according to General Procedure F using N-phthaloylglycine (616 mg, 3 mmol 1 equiv), DMAP (37 mg, 0.3 mmol, 0.1 equiv), N-hydroxytetrachlorophthalimide (903 mg, 3 mmol, 1 equiv) and DIC (0.47 mL, 3 mmol, 1 equiv) in dichloromethane (15 mL). Crude material was purified by column chromatography (80% dichloromethane in Pet. Ether), yielding the product as a white solid (520 mg, 36%).

**<sup>1</sup>H NMR** (400 MHz, CDCl<sub>3</sub>): δ 7.95 - 7.90 (m, 2H), 7.81 - 7.75 (m, 2H), 4.85 (s, 2H).

**<sup>13</sup>C NMR** (101 MHz, CDCl<sub>3</sub>): δ 166.8, 164.1, 157.0, 141.4, 134.8, 131.9, 130.9, 124.7, 124.2, 36.8.

**IR** (solid, cm<sup>-1</sup>): 3030, 3000, 2981, 2950, 1834, 1797, 1776, 1748, 1721, 1379, 1089, 947, 729, 712.

**HRMS:** m/z calcd for C<sub>18</sub>H<sub>6</sub>N<sub>2</sub>O<sub>6</sub>Cl<sub>4</sub> [M+H]<sup>+</sup> 508.8872; found 508.8869.

#### 4,5,6,7-tetrachloro-1,3-dioxoisindolin-2-yl 2-fluoro-2-methylpropanoate (15n)

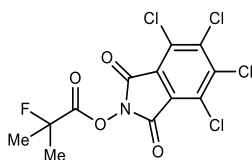

4,5,6,7-tetrachloro-1,3-dioxoisindolin-2-yl 2-fluoro-2-methylpropanoate was prepared according to General Procedure F using 2-fluoro-2-methylpropanoic acid (0.28 mL, 3 mmol, 1 equiv), DMAP (37 mg, 0.3 mmol, 0.1 equiv), N-hydroxytetrachlorophthalimide (903 mg, 3 mmol, 1 equiv) and DIC (0.47 mL, 3 mmol, 1 equiv) in dichloromethane (15 mL). Crude material was purified by column chromatography (50% dichloromethane in Pet. Ether), yielding the product as a white solid (357 mg, 31%). Data was in line with previous characterisation.<sup>9</sup>

### 8.3 General procedure G (Redox-active esters)

An oven dried vial (Biotage Microwave Process Vial 10 mL, equipped with gas-tight pierceable caps) was charged with a stirring bar. The vial was sealed, evacuated, and backfilled with N<sub>2</sub>. To this was added 0.5 ml dry EtOAc, followed by N-methylbenzylamine (13  $\mu$ L, 0.1 mmol, 1 equiv), hydrocinnamaldehyde (26  $\mu$ L, 0.2 mmol, 2 equiv) and TMSOTf (32  $\mu$ L, 0.175 mmol, 1.75 equiv). The mixture was stirred for 15 mins. The cap was removed. Zinc (20 mg, 0.3 mmol, 3 equiv) and the redox active ester (0.2 mmol, 2 equiv) were added in one portion. The microwave vial was sealed, put under vacuum and refilled with N<sub>2</sub>. The mixture was stirred overnight. NEt<sub>3</sub> (0.2 mL) was added. The mixture was stirred for 15 mins. The mixture was dilute with Et<sub>2</sub>O and stirred for 15 mins. The white precipitate formed was removed by filtration through celite. Solvent was removed *in vacuo*. The white solid that remained was dissolved in a minimum amount of dichloromethane. The mixture was diluted with Pet. Ether until no more precipitate was formed (Note: The precipitate should appear as fine powder. If it appeared as a lump, it was re-dissolved in a minimum amount of dichloromethane and diluted with Pet. Ether. It is because the product can be trapped in the lump) The precipitate was removed by filtered through celite. Solvent was removed *in vacuo*. The resulting oil was purified by an acid-base wash. If necessary, the product was further purified by column chromatography.

*For rapid assay yields* an alternative workup procedure can be used. The reaction mixture can be poured on to 600 mg of ground amberlite IRA 96 resin. The mixture was then passed through the resin using 50 mL of dichloromethane. The organic solution was then passed through MgSO<sub>4</sub> and an assay yield could be attained using <sup>1</sup>H NMR using 1,3,5-trimethoxybenzene as an internal standard (*1,1,2,2-tetrachloroethane is not suitable with these reaction mixtures before an acid-base workup is applied*).



## 8.4 Redox-active esters scope

### N-benzyl-N-methyl-1-phenylpentan-3-amine (16a)

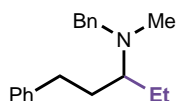

N-benzyl-N-methyl-1-phenylpentan-3-amine was prepared according to General Procedure **G** using Zn (20 mg, 0.3 mmol, 3 equiv), N-methylbenzylamine (13  $\mu$ L, 0.1 mmol, 1 equiv), hydrocinnamaldehyde (26  $\mu$ L, 0.2 mmol, 2 equiv), TMSOTf (32  $\mu$ L, 0.175 mmol, 1.75 equiv) and 4,5,6,7-tetrachloro-1,3-dioxoisindolin-2-yl propionate (71 mg, 0.2 mmol, 2 equiv) in EtOAc (0.5 mL). The pure product was obtained as a colourless oil (23 mg, 88%).

$^1\text{H NMR}$  (400 MHz,  $\text{CDCl}_3$ ):  $\delta$  7.39 - 7.17 (m, 10H), 3.63 (d,  $J = 13.6$  Hz, 1H), 3.57 (d,  $J = 13.5$  Hz, 1H), 2.84 - 2.75 (m, 1H), 2.72 - 2.62 (m, 1H), 2.50-2.41 (m, 1H), 2.18 (s, 3H), 1.88 - 1.77 (m, 1H), 1.70 - 1.62 (m, 2H), 0.95 (t,  $J = 7.6$  Hz, 3H).

$^{13}\text{C NMR}$  (101 MHz,  $\text{CDCl}_3$ ):  $\delta$  143.4, 141.0, 128.9, 128.7, 128.5, 128.4, 126.8, 125.8, 64.3, 58.1, 36.6, 33.8, 32.3, 22.3, 12.2.

**IR** (film,  $\text{cm}^{-1}$ ): 3025, 2957, 2928, 2872, 2786, 1602, 1494, 1453, 1358, 1073, 1027, 908, 732, 697.

**HRMS**:  $m/z$  calcd for  $\text{C}_{19}\text{H}_{25}\text{N}$   $[\text{M}+\text{H}]^+$  268.2060; found 268.2069.

### N-benzyl-N,4-dimethyl-1-phenylpentan-3-amine (4a)

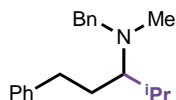

N-benzyl-N,4-dimethyl-1-phenylpentan-3-amine was prepared according to General Procedure **G** using Zn (20 mg, 0.3 mmol, 3 equiv), N-methylbenzylamine (13  $\mu$ L, 0.1 mmol, 1 equiv), hydrocinnamaldehyde (26  $\mu$ L, 0.2 mmol, 2 equiv), TMSOTf (32  $\mu$ L, 0.175 mmol, 1.75 equiv) and 4,5,6,7-tetrachloro-1,3-dioxoisindolin-2-yl isobutyrate (74 mg, 0.2 mmol, 2 equiv) in EtOAc (0.5 mL). The pure product was obtained as a colourless oil (26 mg, 92%). Data was in line with previous characterisation for **4a**.

### N-benzyl-N,4,4-trimethyl-1-phenylpentan-3-amine (10o)

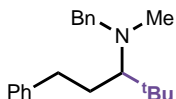

N-benzyl-N,4,4-trimethyl-1-phenylpentan-3-amine was prepared according to General Procedure **G** using Zn (20 mg, 0.3 mmol, 3 equiv), N-methylbenzylamine (13  $\mu$ L, 0.1 mmol, 1 equiv), hydrocinnamaldehyde (26  $\mu$ L, 0.2 mmol, 2 equiv), TMSOTf (32  $\mu$ L, 0.175 mmol, 1.75 equiv) and 4,5,6,7-tetrachloro-1,3-dioxoisindolin-2-yl pivalate (77 mg, 0.2 mmol, 2 equiv) in EtOAc (0.5 mL). The pure product was obtained as a colourless oil (22 mg, 75%). Data was in line with previous characterisation.<sup>1</sup>

### N-benzyl-N-methyl-4-phenylbutan-2-amine (10m)

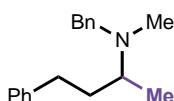

N-benzyl-N-methyl-4-phenylbutan-2-amine was prepared according to General Procedure **G** using Zn (20 mg, 0.3 mmol, 3 equiv), N-methylbenzylamine (13  $\mu$ L, 0.1 mmol, 1 equiv), hydrocinnamaldehyde (26  $\mu$ L, 0.2 mmol, 2 equiv), TMSOTf (32  $\mu$ L, 0.175 mmol, 1.75 equiv) and 4,5,6,7-tetrachloro-1,3-dioxoisindolin-2-yl acetate (69 mg, 0.2 mmol, 2 equiv) in EtOAc (0.5 mL). Crude material was subjected to an acid-base wash according to general procedure **ABW**, followed by column chromatography (0-7% Et<sub>2</sub>O in Pet. Ether) yielding the product as a colourless oil (13 mg, 51%). Data was in line with previous characterisation.<sup>1</sup>

### N-benzyl-N-methyl-1-(1-methylcyclopropyl)-3-phenylpropan-1-amine amine (16b)

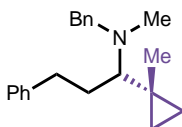

N-benzyl-N-methyl-1-(1-methylcyclopropyl)-3-phenylpropan-1-amine amine was prepared according to General Procedure **G** using Zn (20 mg, 0.3 mmol, 3 equiv), N-methylbenzylamine (13  $\mu$ L, 0.1 mmol, 1 equiv), hydrocinnamaldehyde (26  $\mu$ L, 0.2 mmol, 2 equiv), TMSOTf (32  $\mu$ L, 0.175 mmol, 1.75 equiv) and 4,5,6,7-tetrachloro-1,3-dioxoisindolin-2-yl 1-methylcyclopropane-1-carboxylate (77 mg, 0.2 mmol, 2 equiv) in EtOAc (0.5 mL) with modifications. The acidic aqueous layer was basified with Na<sub>2</sub>CO<sub>3</sub> (saturated, aq), instead of NaOH (10%, aq). The crude product was subjected to an acid-base wash according to general procedure **ABW**, followed by column chromatography (0-15% Et<sub>2</sub>O in Pet. Ether) yielding the product as a colourless oil (18 mg, 62%).

**<sup>1</sup>H NMR** (400 MHz, CDCl<sub>3</sub>):  $\delta$  7.43 - 7.19 (m, 10H), 3.96 (d, J = 13.6 Hz, 1H), 3.65 (d, J = 13.5 Hz, 1H), 2.86 - 2.71 (m, 2H), 2.32 (s, 3H), 2.15 - 2.02 (m, 1H), 1.95 - 1.83 (m, 2H), 1.17 (s, 3H), 0.60 - 0.52 (m, 1H), 0.48 - 0.41 (m, 1H), 0.28 - 0.18 (m, 2H).

**<sup>13</sup>C NMR** (101 MHz, CDCl<sub>3</sub>):  $\delta$  143.2, 141.1, 128.6, 128.52, 128.47, 128.3, 126.7, 125.8, 70.1, 59.1, 39.0, 34.5, 32.7, 21.0, 18.2, 14.5, 12.3.

**IR** (film, cm<sup>-1</sup>): 3083, 3063, 3025, 2994, 2951, 2870, 2783, 1603, 1495, 1453, 1028, 736, 698.

**HRMS**: m/z calcd for C<sub>21</sub>H<sub>27</sub>N [M+H]<sup>+</sup> 294.2217; found 294.2219.

### N-benzyl-1-cyclobutyl-N-methyl-3-phenylpropan-1-amine (16c)

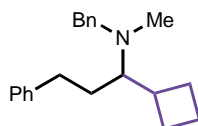

N-benzyl-1-cyclobutyl-N-methyl-3-phenylpropan-1-amine was prepared according to General Procedure G using Zn (20 mg, 0.3 mmol, 3 equiv), N-methylbenzylamine (13  $\mu$ L, 0.1 mmol, 1 equiv), hydrocinnamaldehyde (26  $\mu$ L, 0.2 mmol, 2 equiv), TMSOTf (32  $\mu$ L, 0.175 mmol, 1.75 equiv) and 4,5,6,7-tetrachloro-1,3-dioxoisindolin-2-yl cyclobutanecarboxylate (77 mg, 0.2 mmol, 2 equiv) in EtOAc (0.5 mL). The pure product was obtained as a colourless oil (26 mg, 89%).

$^1\text{H NMR}$  (500 MHz,  $\text{CDCl}_3$ ):  $\delta$  7.31 - 7.05 (m, 10H), 3.59 (d,  $J = 13.6$  Hz, 1H), 3.55 (d,  $J = 13.6$  Hz, 1H), 2.81 - 2.73 (m, 1H), 2.61 - 2.40 (m, 3H), 2.10 (s, 3H), 2.02 - 1.92 (m, 1H), 1.90 - 1.72 (m, 3H), 1.69 - 1.43 (m, 4H).

$^{13}\text{C NMR}$  (176 MHz,  $\text{CDCl}_3$ ):  $\delta$  143.4, 141.0, 128.49, 128.45, 128.3, 128.2, 126.6, 125.6, 68.1, 58.9, 38.2, 37.1, 33.5, 30.9, 29.1, 28.0, 19.1.

**IR** (film,  $\text{cm}^{-1}$ ): 3025, 2933, 2956, 2787, 1494, 1453, 1020, 733, 698.

**HRMS**:  $m/z$  calcd for  $\text{C}_{21}\text{H}_{27}\text{N}$   $[\text{M}+\text{H}]^+$  294.2217; found 294.2229.

### N-benzyl-N-methyl-1-(3-methyloxetan-3-yl)-3-phenylpropan-1-amine (16d)

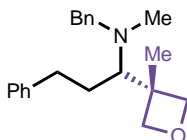

N-benzyl-N-methyl-1-(3-methyloxetan-3-yl)-3-phenylpropan-1-amine was prepared according to General Procedure G using Zn (20 mg, 0.3 mmol, 3 equiv), N-methylbenzylamine (13  $\mu$ L, 0.1 mmol, 1 equiv), hydrocinnamaldehyde (26  $\mu$ L, 0.2 mmol, 2 equiv), TMSOTf (32  $\mu$ L, 0.175 mmol, 1.75 equiv) and 4,5,6,7-tetrachloro-1,3-dioxoisindolin-2-yl 3-methyloxetane-3-carboxylate (80 mg, 0.2 mmol, 2 equiv) in EtOAc (0.5 mL). The pure product was obtained as a colourless oil (19 mg, 60%).

$^1\text{H NMR}$  (400 MHz,  $\text{CDCl}_3$ ):  $\delta$  7.38 - 7.31 (m, 6H), 7.30-7.21 (m, 4H), 4.71 (d,  $J = 5.8$  Hz, 1H), 4.53 (d,  $J = 5.6$  Hz, 1H), 4.33 (d,  $J = 5.8$  Hz, 1H), 4.21 (d,  $J = 5.6$  Hz, 1H), 3.83 (d,  $J = 13.7$  Hz, 1H), 3.76 (d,  $J = 13.8$  Hz, 1H), 3.04 (dd,  $J = 8.4$  Hz, 4.0 Hz, 1H), 2.92 - 2.81 (m, 1H), 2.70-2.60 (m, 1H), 2.29 (s, 3H), 2.12 - 1.99 (m, 1H), 1.74 - 1.61 (m, 1H), 1.50 (s, 3H).

$^{13}\text{C NMR}$  (101 MHz,  $\text{CDCl}_3$ ):  $\delta$  142.3, 140.6, 128.7, 128.5, 128.3, 127.0, 126.2, 82.9, 82.2, 68.5, 60.5, 45.0, 39.0, 35.2, 29.1, 21.5.

**IR** (film,  $\text{cm}^{-1}$ ): 3025, 2932, 2863, 2787, 1602, 1494, 1452, 977, 736, 698.

**HRMS**:  $m/z$  calcd for  $\text{C}_{21}\text{H}_{27}\text{NO}$   $[\text{M}+\text{H}]^+$  310.2166, found 310.2168.

### 3-(1-(benzyl(methyl)amino)-3-phenylpropyl)cyclobutan-1-one (16e)

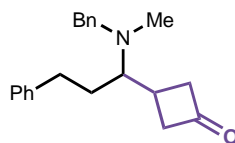

3-(1-(benzyl(methyl)amino)-3-phenylpropyl)cyclobutan-1-one was prepared according to General Procedure **G** using Zn (20 mg, 0.3 mmol, 3 equiv), N-methylbenzylamine (13  $\mu$ L, 0.1 mmol, 1 equiv), hydrocinnamaldehyde (26  $\mu$ L, 0.2 mmol, 2 equiv), TMSOTf (32  $\mu$ L, 0.175 mmol, 1.75 equiv) and 4,5,6,7-tetrachloro-1,3-dioxoisindolin-2-yl 3-oxocyclobutane-1-carboxylate (79 mg, 0.2 mmol, 2 equiv) with modifications. 0.75 mL of EtOAc, instead of 0.5 mL, was used. Crude material was subjected to an acid-base wash according to general procedure **ABW** followed by column chromatography (0-20% Et<sub>2</sub>O in Pet. Ether) yielding the product as a colourless oil (13 mg, 41%).

**<sup>1</sup>H NMR** (400 MHz, CDCl<sub>3</sub>):  $\delta$  7.39 - 7.18 (m, 10H), 3.74 (s, 2H), 3.16 - 3.01 (m, 3H), 2.94 - 2.67 (m, 4H), 2.66 - 2.55 (m, 1H), 2.29 (s, 3H), 2.05 - 1.94 (m, 1H), 1.76 - 1.65 (m, 1H).

**<sup>13</sup>C NMR** (101 MHz, CDCl<sub>3</sub>):  $\delta$  207.4, 142.5, 140.2, 128.32, 128.58, 128.47 127.1, 126.1, 67.1, 59.1, 52.0, 51.6, 37.0, 33.9, 31.3, 26.6.

**IR** (film, cm<sup>-1</sup>): 3060, 3025, 2929, 2858, 2789, 1778, 1742, 1671, 1602, 1495, 1453, 1382, 1178, 1113, 1075, 1028, 748, 699.

**HRMS**: m/z calcd for C<sub>21</sub>H<sub>25</sub>NO [M+H]<sup>+</sup> 308.2009; found 308.2012.

### N-benzyl-1-(3,3-difluorocyclobutyl)-N-methyl-3-phenylpropan-1-amine (16f)

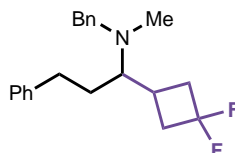

N-benzyl-1-(3,3-difluorocyclobutyl)-N-methyl-3-phenylpropan-1-amine was prepared according to General Procedure **G** using Zn (20 mg, 0.3 mmol, 3 equiv), N-methylbenzylamine (13  $\mu$ L, 0.1 mmol, 1 equiv), hydrocinnamaldehyde (26  $\mu$ L, 0.2 mmol, 2 equiv), TMSOTf (32  $\mu$ L, 0.175 mmol, 1.75 equiv) and 4,5,6,7-tetrachloro-1,3-dioxoisindolin-2-yl 3,3-difluorocyclobutane-1-carboxylate (84 mg, 0.2 mmol, 2 equiv) in EtOAc (0.5 mL). The crude product was subjected to an acid-base wash according to general procedure **ABW** followed by column chromatography (0-15% Et<sub>2</sub>O in Pet. Ether) yielding the product as a colourless oil (13 mg, 40%).

**<sup>1</sup>H NMR** (400 MHz, CDCl<sub>3</sub>):  $\delta$  7.33 - 7.19 (m, 10H), 3.66 (s, 2H), 2.83 (ddd, J = 14.0, 9.8, 4.7 Hz, 1H), 2.71 - 2.55 (m, 4H), 2.51 - 2.30 (m, 2H), 2.25 - 2.13 (m, 4H), 1.92-1.80 (m, 1H), 1.63 - 1.54 (m, 1H).

**<sup>13</sup>C NMR** (101 MHz, CDCl<sub>3</sub>):  $\delta$  142.6, 140.3, 128.6, 128.53, 128.48, 128.4, 127.0, 126.0, 120.1 (dd, J = 287.2, 269.8 Hz), 67.2 (t, J = 2.3 Hz), 59.0, 40.5 (dd, J = 21.6, 19.3 Hz), 40.1 (dd, J = 21.6, 19.3 Hz), 36.9, 33.7, 31.0, 25.9 (dd, J = 13.8, 3.2 Hz).

**IR** (film, cm<sup>-1</sup>): 3026, 2945, 2857, 2790, 1293, 1167, 898, 697.

**<sup>19</sup>F NMR** (376 MHz, CDCl<sub>3</sub>):  $\delta$  -81.7 (d, J = 191.7 Hz), -101.2 (d, J = 191.6 Hz).

**HRMS**: m/z calcd for C<sub>21</sub>H<sub>25</sub>F<sub>2</sub>N [M+H]<sup>+</sup> 330.2028; found 330.2035.

**N-benzyl-N-methyl-1-(4-methyltetrahydro-2H-pyran-4-yl)-3-phenylpropan-1-amine (16g)**

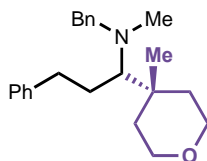

N-benzyl-N-methyl-1-(4-methyltetrahydro-2H-pyran-4-yl)-3-phenylpropan-1-amine was prepared according to General Procedure G using Zn (20 mg, 0.3 mmol, 3 equiv), N-methylbenzylamine (13  $\mu$ L, 0.1 mmol, 1 equiv), hydrocinnamaldehyde (26  $\mu$ L, 0.2 mmol, 2 equiv), TMSOTf (32  $\mu$ L, 0.175 mmol, 1.75 equiv) and 4,5,6,7-tetrachloro-1,3-dioxoisindolin-2-yl 4-methyltetrahydro-2H-pyran-4-carboxylate (85 mg, 0.2 mmol, 2 equiv) in EtOAc (0.5 mL). The pure product was obtained as a colourless oil (23 mg, 68%).

**$^1\text{H NMR}$**  (400 MHz,  $\text{CDCl}_3$ ):  $\delta$  7.43 - 7.31 (m, 6H), 7.30 - 7.21 (m, 4H), 4.05 (d,  $J$  = 14.0 Hz, 1H), 3.90 (d,  $J$  = 13.9 Hz, 1H), 3.86 - 3.72 (m, 2H), 3.66 - 3.55 (m, 2H), 2.98 - 2.88 (m, 1H), 2.72-2.60 (m, 1H), 2.54 - 2.46 (m, 1H), 2.43 (s, 3H), 2.09-1.96 (m, 1H), 1.89 - 1.56 (m, 4H), 1.32 - 1.24 (m, 1H), 1.07 (s, 3H).

**$^{13}\text{C NMR}$**  (101 MHz,  $\text{CDCl}_3$ ):  $\delta$  142.8, 141.1, 128.6, 128.5, 128.4, 126.8, 126.0, 73.5, 64.4, 63.7, 38.0, 36.8, 36.5, 36.0, 28.4, 18.6.

**IR** (thin film,  $\text{cm}^{-1}$ ): 3025, 2952, 2848, 2783, 1494, 14522, 1109, 1027, 733, 698.

**HRMS**:  $m/z$  calcd for  $\text{C}_{23}\text{H}_{31}\text{NO}$   $[\text{M}+\text{H}]^+$  338.2479; found 338.2483.

**N-benzyl-1-cycloheptyl-N-methyl-3-phenylpropan-1-amine (16h)**

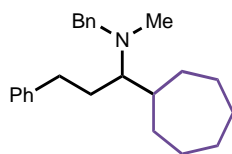

N-benzyl-1-cycloheptyl-N-methyl-3-phenylpropan-1-amine was prepared according to General Procedure G using Zn (20 mg, 0.3 mmol, 3 equiv), N-methylbenzylamine (13  $\mu$ L, 0.1 mmol, 1 equiv), hydrocinnamaldehyde (26  $\mu$ L, 0.2 mmol, 2 equiv), TMSOTf (32  $\mu$ L, 0.175 mmol, 1.75 equiv) and 4,5,6,7-tetrachloro-1,3-dioxoisindolin-2-yl cycloheptanecarboxylate (85 mg, 0.2 mmol, 2 equiv) in EtOAc (0.5 mL). The pure product was obtained as a colourless oil (21 mg, 63%).

**$^1\text{H NMR}$**  (400 MHz,  $\text{CDCl}_3$ ):  $\delta$  7.39 - 7.16 (m, 10H), 3.74 - 3.63 (m, 2H), 2.88 - 2.77 (m, 1H), 2.69 - 2.59 (m, 1H), 2.46 - 2.40 (m, 1H), 2.22 (s, 3H), 1.99 - 1.23 (m, 15H).

**$^{13}\text{C NMR}$**  (101 MHz,  $\text{CDCl}_3$ ):  $\delta$  143.4, 141.0, 128.7, 128.6, 128.5, 128.3, 126.8, 125.8, 68.2, 59.2, 40.9, 37.5, 35.3, 32.8, 31.2, 30.0, 28.8, 28.4, 27.4, 27.2.

**IR** (film,  $\text{cm}^{-1}$ ): 3084, 3061, 3025, 2921, 2852, 2785, 1602, 1494, 1453, 1027, 733, 698.

**HRMS**:  $m/z$  calcd for  $\text{C}_{24}\text{H}_{33}\text{N}$   $[\text{M}+\text{H}]^+$  336.2686; found 336.2694.

### N-benzyl-1-methoxy-N-methyl-5-phenylpentan-3-amine (16i)

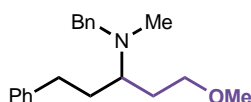

N-benzyl-1-methoxy-N-methyl-5-phenylpentan-3-amine was prepared according to General Procedure **G** using Zn (20 mg, 0.3 mmol, 3 equiv), N-methylbenzylamine (13  $\mu$ L, 0.1 mmol, 1 equiv), hydrocinnamaldehyde (26  $\mu$ L, 0.2 mmol, 2 equiv), TMSOTf (32  $\mu$ L, 0.175 mmol, 1.75 equiv) and 4,5,6,7-tetrachloro-1,3-dioxoisindolin-2-yl 3-methoxypropanoate (77 mg, 0.2 mmol, 2 equiv) in EtOAc (0.5 mL). The pure product was obtained as a colourless oil (19 mg, 62%).

$^1\text{H NMR}$  (400 MHz,  $\text{CDCl}_3$ ):  $\delta$  7.39 - 7.18 (m, 10H), 3.60 (s, 2H), 3.48 (t,  $J = 6.8$  Hz, 2H), 3.35 (s, 3H), 2.82 - 2.63 (m, 3H), 2.19 (s, 3H), 1.97 - 1.84 (m, 2H), 1.71 - 1.57 (m, 2H).

$^{13}\text{C NMR}$  (101 MHz,  $\text{CDCl}_3$ ):  $\delta$  143.0, 140.6, 128.8, 128.54, 128.48, 128.3, 126.84, 125.82, 71.2, 59.5, 58.8, 58.1, 36.3, 33.6, 32.4, 29.9.

**IR** (film,  $\text{cm}^{-1}$ ): 3061, 3025, 2929, 2860, 2804, 1602, 1494, 1453, 1117, 1026, 733, 698.

**HRMS**:  $m/z$  calcd for  $\text{C}_{20}\text{H}_{27}\text{NO}$   $[\text{M}+\text{H}]^+$  298.2166; found 298.2170.

### N-benzyl-1-(benzyloxy)-N-methylbutan-2-amine (16j)

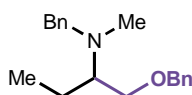

N-benzyl-1-(benzyloxy)-N-methylbutan-2-amine was prepared according to General Procedure **G** using Zn (20 mg, 0.3 mmol, 3 equiv), N-methylbenzylamine (13  $\mu$ L, 0.1 mmol, 1 equiv), propionaldehyde (14  $\mu$ L, 0.2 mmol, 2 equiv), TMSOTf (32  $\mu$ L, 0.175 mmol, 1.75 equiv) and 4,5,6,7-tetrachloro-1,3-dioxoisindolin-2-yl 2-(benzyloxy)acetate (90 mg, 0.2 mmol, 2 equiv) in EtOAc (0.5 mL). The crude product was subjected to an acid-base wash according to general procedure **ABW** followed by column chromatography (0-40%  $\text{Et}_2\text{O}$  in Pet. Ether) yielding the product as a colourless oil (14 mg, 48%).

$^1\text{H NMR}$  (400 MHz,  $\text{CDCl}_3$ ):  $\delta$  7.41 - 7.22 (m, 10H), 4.60 - 4.52 (m, 2H), 3.81-3.66 (m, 3H), 3.54 - 3.46 (m, 1H), 2.85 - 2.73 (m, 1H), 2.28 (s, 3H), 1.66 - 1.49 (m, 2H), 1.01 (t,  $J = 7.4$  Hz, 3H).

$^{13}\text{C NMR}$  (101 MHz,  $\text{CDCl}_3$ ):  $\delta$  140.8, 138.8, 128.8, 128.5, 128.6, 127.7, 127.6, 126.8, 73.3, 70.5, 64.1, 58.8, 37.5, 22.0, 11.8.

**IR** (thin film,  $\text{cm}^{-1}$ ): 3028, 2961, 2930, 2871, 2789, 1494, 1453, 1361, 1101, 1027, 733, 697.

**HRMS**:  $m/z$  calcd for  $\text{C}_{19}\text{H}_{25}\text{NO}$   $[\text{M}+\text{H}]^+$  284.2009; found 284.2014.

## 2-(2-(benzyl(methyl)amino)-4-phenylbutyl)isoindoline-1,3-dione (16k)

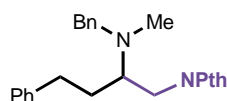

2-(2-(benzyl(methyl)amino)-4-phenylbutyl)isoindoline-1,3-dione was prepared according to General Procedure G using Zn (20 mg, 0.3 mmol, 3 equiv), N-methylbenzylamine (13  $\mu$ L, 0.1 mmol, 1 equiv), propionaldehyde (14  $\mu$ L, 0.2 mmol, 2 equiv), TMSOTf (32  $\mu$ L, 0.175 mmol, 1.75 equiv) and 4,5,6,7-tetrachloro-1,3-dioxoisoindolin-2-yl 2-(1,3-dioxoisoindolin-2-yl)acetate (98 mg, 0.2 mmol, 2 equiv) in EtOAc (0.5 mL) with modifications. The acidic aqueous layer was basified with Na<sub>2</sub>CO<sub>3</sub> (saturated, aq), instead of NaOH (10%, aq). The pure product was obtained as a colourless oil (29 mg, 74%).

<sup>1</sup>H NMR (400 MHz, CDCl<sub>3</sub>):  $\delta$  7.88 - 7.82 (m, 2H), 7.77 - 7.71 (m, 2H), 7.33 - 7.26 (m, 2H), 7.25 - 7.17 (m, 3H), 7.15 - 7.00 (m, 5H), 3.92 (dd, J = 13.5 Hz, 8.9 Hz, 1H), 3.70 - 3.51 (m, 3H), 3.08 (quint, J = 7.1 Hz, 1H), 2.86 - 2.67 (m, 2H), 2.33 (s, 3H), 2.05 - 1.91 (m, 1H), 1.74 - 1.60 (m, 1H).

<sup>13</sup>C NMR (101 MHz, CDCl<sub>3</sub>):  $\delta$  168.5, 142.3, 139.9, 133.9, 132.4, 128.63, 128.54, 128.59, 128.1, 126.7, 126.0, 123.2, 59.2, 58.9, 38.5, 35.8, 33.5, 30.1.

IR (film, cm<sup>-1</sup>): 3084, 6060, 3026, 2938, 2856, 2793, 1770, 1708, 1397, 722, 713, 699;

HRMS: m/z calcd for C<sub>26</sub>H<sub>26</sub>N<sub>2</sub>O<sub>2</sub> [M+H]<sup>+</sup> 399.2068, found 399.2068.

## N-benzyl-N-methyl-1-(methylthio)-4-phenylbutan-2-amine (16l)

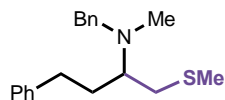

N-benzyl-N-methyl-1-(methylthio)-4-phenylbutan-2-amine was prepared according to General Procedure G using Zn (20 mg, 0.3 mmol, 3 equiv), N-methylbenzylamine (13  $\mu$ L, 0.1 mmol, 1 equiv), propionaldehyde (14  $\mu$ L, 0.2 mmol, 2 equiv), TMSOTf (32  $\mu$ L, 0.175 mmol, 1.75 equiv) and 4,5,6,7-tetrachloro-1,3-dioxoisoindolin-2-yl 2-(methylthio)acetate (78 mg, 0.2 mmol, 2 equiv) in EtOAc (0.5 mL). The pure product was obtained as a colourless oil (22 mg, 74%).

<sup>1</sup>H NMR (400 MHz, CDCl<sub>3</sub>):  $\delta$  7.43 - 7.18 (m, 10H), 3.74 (d, J = 13.4 Hz, 1H), 3.61 (d, J = 13.4 Hz, 1H), 2.93 - 2.77 (m, 3H), 2.77 - 2.65 (m, 1H), 2.50 - 2.39 (m, 1H), 2.25 (s, 3H), 2.08 (s, 3H), 2.00 - 1.82 (m, 2H).

<sup>13</sup>C NMR (101 MHz, CDCl<sub>3</sub>):  $\delta$  142.7, 140.2, 128.8, 128.6, 128.58, 128.46, 127.0, 125.8, 61.6, 58.0, 36.3, 34.8, 33.3, 32.4, 16.4.

IR (film, cm<sup>-1</sup>): 3083, 3061, 3025, 2914, 2849, 2787, 1602, 1493, 1453, 1358, 1319, 1124, 1074, 1027, 957, 824, 733, 58.

HRMS: m/z calcd for C<sub>19</sub>H<sub>25</sub>NS [M+H]<sup>+</sup> 300.1781, found 300.1783.

## N-benzyl-N-methyl-3-phenyl-1-(tetrahydrofuran-2-yl)propan-1-amine (16m)

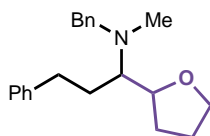

N-benzyl-N-methyl-3-phenyl-1-(tetrahydrofuran-2-yl)propan-1-amine was prepared according to General Procedure G using Zn (20 mg, 0.3 mmol, 3 equiv), N-methylbenzylamine (13  $\mu$ L, 0.1 mmol, 1 equiv), propionaldehyde (14  $\mu$ L, 0.2 mmol, 2 equiv), TMSOTf (32  $\mu$ L, 0.175 mmol, 1.75 equiv) and 4,5,6,7-tetrachloro-1,3-dioxoisindolin-2-yl tetrahydrofuran-2-carboxylate (80 mg, 0.2 mmol, 2 equiv) in EtOAc (0.5 mL). The pure product was obtained as a colourless oil (23 mg, 1.3:1 d.r., 73%)

For characterization, a pure sample of one of the diastereomers can be obtained by column chromatography (0-15% Et<sub>2</sub>O in Pet. Ether).

**<sup>1</sup>H NMR** (400 MHz, CDCl<sub>3</sub>):  $\delta$  7.39 (d, J = 7.4 Hz, 2H), 7.33 - 7.16 (m, 8H), 4.01 (q, J = 7.1 Hz, 1H), 3.88 - 3.72 (m, 4H), 2.97 - 2.90 (m, 1H), 2.69 (ddd, J = 13.7, 9.6, 6.8 Hz, 1H), 2.62 - 2.57 (m, 1H), 2.32 (s, 3H), 1.93 - 1.71 (m, 4H), 1.64-1.53 (m, 2H).

**<sup>13</sup>C NMR** (101 MHz, CDCl<sub>3</sub>):  $\delta$  143.2, 141.4, 128.8, 128.6, 128.4, 128.2, 126.6, 125.8, 80.6, 67.8, 66.0, 59.9, 37.1, 33.6, 30.8, 30.1, 26.1.

**IR** (thin film, cm<sup>-1</sup>): 3025, 2947, 2860, 1495, 1453, 1065, 1040, 1028, 734, 698.

**HRMS**: m/z calcd for C<sub>21</sub>H<sub>27</sub>NO [M+H]<sup>+</sup> 310.2166; found 310.2171.

*<sup>1</sup>H Spectrum of diastereomeric mixture*

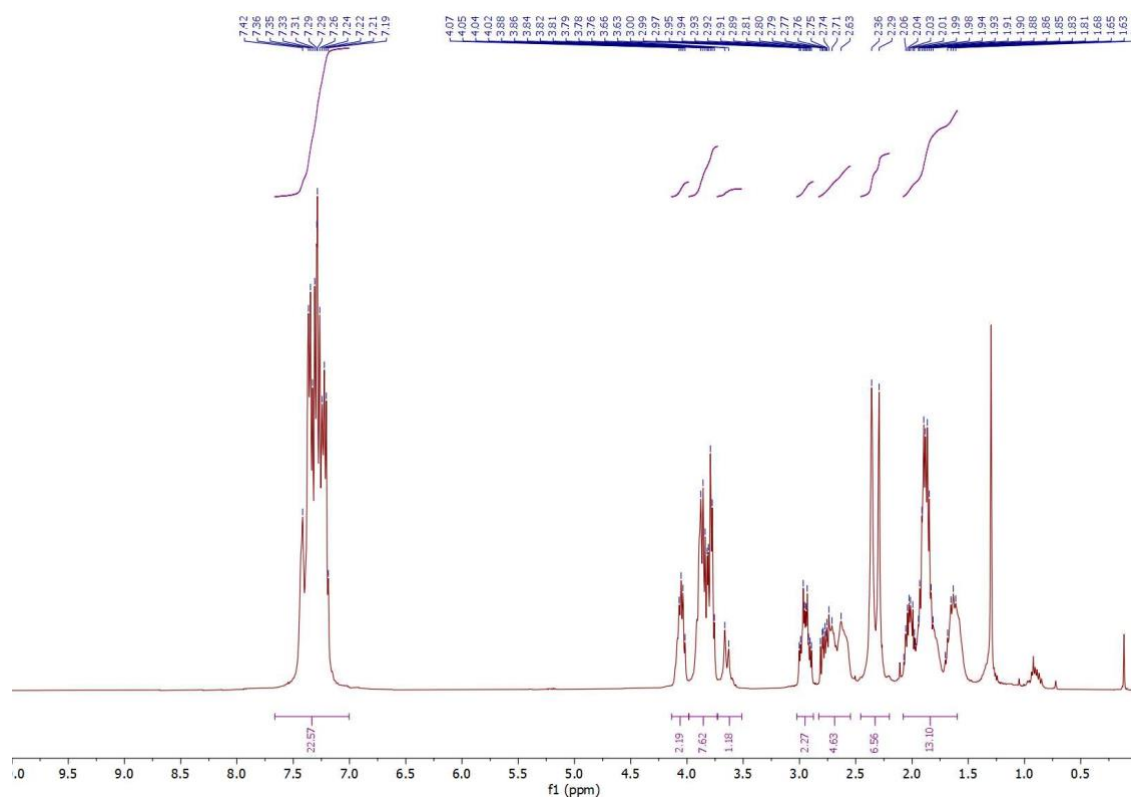



### N-benzyl-4-fluoro-N,4-dimethyl-1-phenylpentan-3-amine (16n)

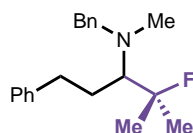

N-benzyl-4-fluoro-N,4-dimethyl-1-phenylpentan-3-amine was prepared according to General Procedure G using Zn (20 mg, 0.3 mmol, 3 equiv), N-methylbenzylamine (13  $\mu$ L, 0.1 mmol, 1 equiv), propionaldehyde (14  $\mu$ L, 0.2 mmol, 2 equiv), TMSOTf (32  $\mu$ L, 0.175 mmol, 1.75 equiv) and 4,5,6,7-tetrachloro-1,3-dioxoisindolin-2-yl 2-fluoro-2-methylpropanoate (78 mg, 0.2 mmol, 2 equiv) in EtOAc (0.5 mL). The pure product was obtained as a colourless oil (21 mg, 70%).

$^1\text{H}$  NMR (400 MHz,  $\text{CDCl}_3$ ):  $\delta$  7.35 - 7.28 (m, 6H), 3.89 (d,  $J$  = 13.9 Hz, 1H), 3.82 (d,  $J$  = 13.9 Hz, 1H), 2.94 - 2.82 (m, 1H), 2.76 - 2.64 (m, 2H), 2.36 (s, 3H), 2.06 - 1.86 (m, 2H), 1.43 (d,  $J$  = 2.0, 3H), 1.38 ( $J$  = d, 1.2, 3H).

$^{13}\text{C}$  NMR (101 MHz,  $\text{CDCl}_3$ ):  $\delta$  142.7, 140.8, 128.6, 128.4, 126.9, 126.0, 100.0 (d, 170.1.0 Hz), 69.5 (d, 22.4 Hz), 60.9, 38.2, 35.2, 28.3 (d, 2.8 Hz), 26.8 (d, 24.2 Hz), 25.4 (d, 24.8 Hz).

$^{19}\text{F}$  NMR (375 MHz,  $\text{CDCl}_3$ ):  $\delta$  -142.0

IR (film,  $\text{cm}^{-1}$ ): 3084, 3062, 3026, 2978, 2935, 2793, 1602, 1495, 1453, 1369, 1028, 734, 698.

**HRMS:**  $m/z$  calcd for  $\text{C}_{20}\text{H}_{26}\text{FN}$   $[\text{M}+\text{H}]^+$  300.2123; found 300.2128.

## 9. Synthesis of $\alpha$ -tertiary amines

### 9.1 Reaction optimization

| Entry           | 1b / 2b / 3a (equiv) | Reductant      | Additive                                       | Solvent                         | [Conc] | Yield <sup>a</sup> / % |
|-----------------|----------------------|----------------|------------------------------------------------|---------------------------------|--------|------------------------|
| 1               | 1.0 / 1.5 / 3.0      | Zn (2.0 equiv) | -                                              | EtOAc                           | 0.4 M  | 9                      |
| 2               | 1.0 / 1.5 / 3.0      | Zn (2.0 equiv) | -                                              | CH <sub>2</sub> Cl <sub>2</sub> | 0.4 M  | 53                     |
| 3               | 1.0 / 1.5 / 3.0      | Zn (2.0 equiv) | -                                              | Toluene                         | 0.4 M  | 14                     |
| 4               | 1.0 / 1.5 / 3.0      | Zn (2.0 equiv) | CuI (10 mol%)                                  | CH <sub>2</sub> Cl <sub>2</sub> | 0.4 M  | 41                     |
| 5               | 1.0 / 1.5 / 3.0      | Zn (2.0 equiv) | CuI (10 mol%)                                  | Toluene                         | 0.4 M  | 59                     |
| 6               | 1.0 / 1.5 / 3.0      | Zn (2.0 equiv) | CuI (10 mol%)                                  | CH <sub>2</sub> Cl <sub>2</sub> | 0.8 M  | 51                     |
| 7               | 1.0 / 1.5 / 3.0      | Zn (2.0 equiv) | CuI (10 mol%)                                  | Toluene                         | 0.8 M  | 51                     |
| 8               | 1.0 / 1.5 / 3.0      | Zn (2.0 equiv) | CuI (10 mol%)                                  | Toluene                         | 1.6 M  | 71                     |
| 9               | 1.0 / 1.5 / 3.0      | Zn (3.0 equiv) | CuI (10 mol%)                                  | Toluene                         | 1.6 M  | 73                     |
| 10              | 1.0 / 1.5 / 3.0      | Zn (3.0 equiv) | CuI (10 mol%),<br>H <sub>2</sub> O (1.5 equiv) | CH <sub>2</sub> Cl <sub>2</sub> | 1.6 M  | 72                     |
| 11              | 1.0 / 1.5 / 3.0      | Zn (3.0 equiv) | CuI (10 mol%),<br>H <sub>2</sub> O (1.5 equiv) | Toluene                         | 1.6 M  | 93                     |
| 12 <sup>b</sup> | 1.0 / 1.5 / 3.0      | Zn (3.0 equiv) | CuI (10 mol%),<br>H <sub>2</sub> O (1.5 equiv) | Toluene                         | 1.6 M  | 100                    |

<sup>a</sup> Each 0.4 mmol reaction crude was worked up according to general procedure A and yields were determined by <sup>1</sup>H NMR using 1,1,2,2-tetrachloroethane as internal standard. <sup>b</sup> Reaction run for 24 h.

## 9.2 Amino-oxetane reaction development

### 9.2.1 Reaction optimization

| Entry          | 1b / 2c / 3a (equiv) | Reductant      | TMSOTf / equiv | DCM / mL | HFIP / mL | CuI (mol%) | Yield <sup>a</sup> / % |
|----------------|----------------------|----------------|----------------|----------|-----------|------------|------------------------|
| 1              | 1.0 / 1.5 / 3.0      | Zn (3.0 equiv) | 3.0            | 0.25     | 0.00      | 40         | 15                     |
| 2              | 1.0 / 1.5 / 3.0      | Zn (3.0 equiv) | 3.0            | 0.50     | 0.00      | 40         | 44                     |
| 3              | 1.0 / 1.5 / 3.0      | Zn (3.0 equiv) | 3.0            | 1.00     | 0.00      | 40         | 15                     |
| 4              | 1.0 / 1.5 / 3.0      | Zn (3.0 equiv) | 3.0            | 0.50     | 0.05      | 40         | 49                     |
| 5              | 1.0 / 1.5 / 3.0      | Zn (3.0 equiv) | 3.0            | 0.50     | 0.10      | 40         | 58                     |
| 6              | 1.0 / 1.5 / 3.0      | Zn (3.0 equiv) | 3.0            | 0.50     | 0.15      | 40         | 44                     |
| 7              | 1.0 / 2.0 / 4.0      | Zn (3.0 equiv) | 1.5            | 0.40     | 0.20      | 40         | 40                     |
| 8 <sup>b</sup> | 1.0 / 2.0 / 4.0      | Zn (3.0 equiv) | 1.5            | 0.40     | 0.20      | 40         | 26                     |
| 9              | 1.0 / 2.0 / 4.0      | Zn (3.0 equiv) | 1.5            | 0.20     | 0.10      | 40         | 40                     |
| 10             | 1.0 / 2.0 / 4.0      | Zn (3.0 equiv) | 1.5            | 0.40     | 0.20      | 100        | 47                     |
| 11             | 1.0 / 2.0 / 4.0      | Zn (3.0 equiv) | 1.5            | 0.50     | 0.10      | 50         | 73                     |
| 12             | 1.0 / 2.0 / 4.0      | Zn (3.0 equiv) | 1.5            | 0.25     | 0.05      | 50         | 68                     |
| 13             | 1.0 / 2.0 / 3.0      | Zn (3.0 equiv) | 1.5            | 0.50     | 0.10      | 50         | 57                     |
| 14             | 1.0 / 2.0 / 4.0      | Zn (3.0 equiv) | 1.5            | 0.60     | 0.10      | 50         | 37                     |
| 15             | 1.0 / 2.0 / 4.0      | Zn (3.0 equiv) | 1.25           | 0.50     | 0.10      | 50         | 51                     |
| 16             | 1.0 / 2.5 / 4.0      | Zn (3.0 equiv) | 1.5            | 0.50     | 0.10      | 50         | 60                     |
| 17             | 1.0 / 2.0 / 5.0      | Zn (3.0 equiv) | 1.5            | 0.50     | 0.10      | 50         | 44                     |

|    |                 |                |     |      |      |    |    |
|----|-----------------|----------------|-----|------|------|----|----|
| 18 | 1.0 / 2.5 / 4.0 | Zn (3.0 equiv) | 2.0 | 0.50 | 0.10 | 50 | 77 |
| 19 | 1.0 / 2.5 / 3.0 | Zn (3.0 equiv) | 2.0 | 0.50 | 0.10 | 50 | 68 |
| 20 | 1.0 / 2.0 / 4.0 | Zn (3.0 equiv) | 2.0 | 0.50 | 0.10 | 50 | 64 |
| 21 | 1.0 / 2.0 / 4.0 | Zn (3.0 equiv) | 2.5 | 0.50 | 0.10 | 50 | 38 |
| 22 | 1.0 / 2.0 / 4.0 | Zn (3.0 equiv) | 3.0 | 0.50 | 0.10 | 50 | 11 |
| 23 | 1.0 / 2.0 / 4.0 | Zn (3.0 equiv) | 2.0 | 0.50 | 0.10 | 50 | 36 |

<sup>a</sup> Each 0.4 mmol reaction crude was worked up according to general procedure A and yields were determined by <sup>1</sup>H NMR using 1,1,2,2-tetrachloroethane as internal standard. <sup>b</sup> HCl salt of amine used.

## 9.2.2 Amino-oxetane time course study

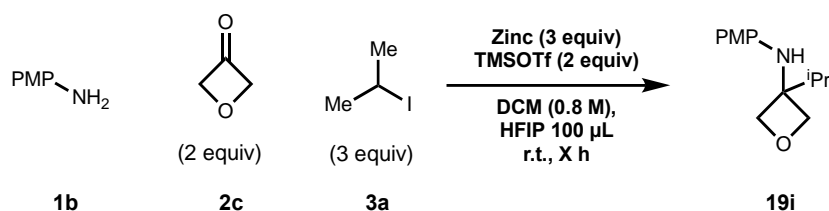

Time studies were set up according to General Procedure **J** using Zn (79 mg, 1.2 mmol, 3 equiv), *p*-anisidine (49 mg, 0.4 mmol, 1 equiv), copper iodide (38 mg, 0.2 mmol, 50 mol%), oxetan-3-one (59  $\mu\text{L}$ , 1.0 mmol, 2.5 equiv), 2-iodopropane (160  $\mu\text{L}$ , 1.6 mmol, 4.0 equiv) and TMSOTf (138  $\mu\text{L}$ , 0.8 mmol, 2.0 equiv). Each 0.4 mmol reaction crude was worked up and yields were determined by  $^1\text{H}$  NMR using 1,1,2,2-tetrachloroethane as internal standard. Each time point was run in duplicate to give average yields.

| Time/ h | Run 1 /% | Run 2 /% | Average /% |
|---------|----------|----------|------------|
| 1       | 18       | 11       | 14.55      |
| 3       | 31       | 28       | 29.5       |
| 6       | 30       | 31       | 30.4       |
| 8       | 28       | 31       | 29.9       |
| 12      | 44       | 39       | 41.1       |
| 14      | 60       | 62       | 60.55      |
| 16      | 40       | 43       | 41.5       |
| 24      | 33       | 36       | 34.85      |

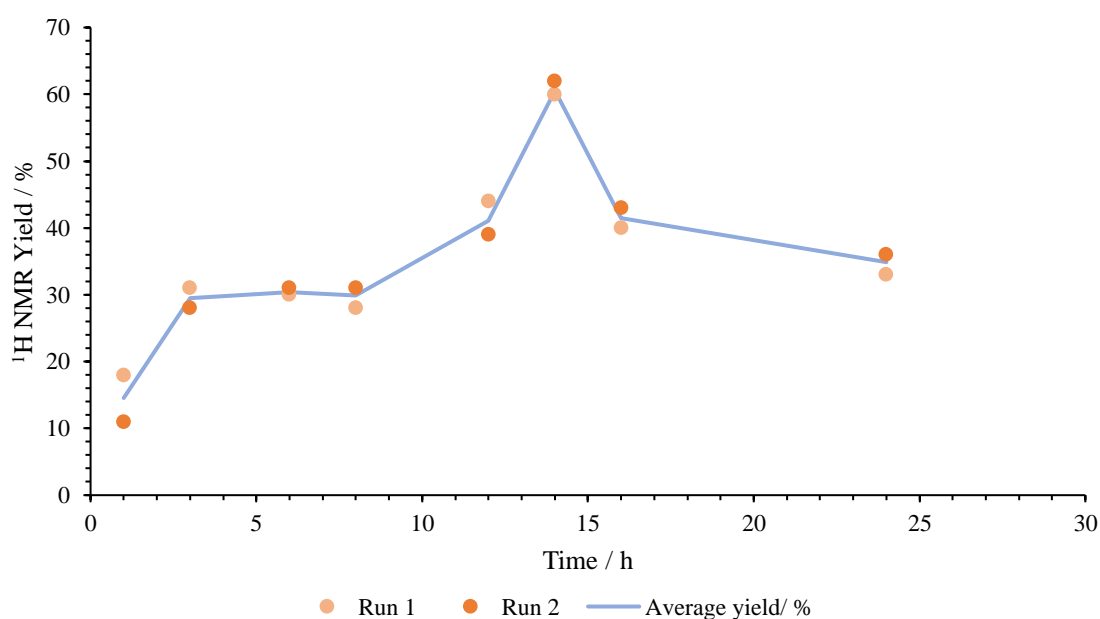

### 9.2.3 Product degradation study

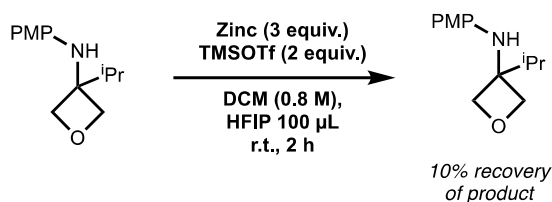

An oven dried vial (Biotage Microwave Process Vial 10 mL, equipped with gas-tight pierceable caps) was charged with a stirring bar, amine (0.4 mmol), Zn dust (79 mg, 1.2 mmol, 3.0 equiv) and copper iodide (38 mg, 0.2 mmol, 50 mol%). The vial was sealed, evacuated, and backfilled with N<sub>2</sub>. To this was added 0.5  $\mu$ l anhydrous dichloromethane. While stirring, HFIP (100  $\mu$ L) followed by TMSOTf (138  $\mu$ L, 0.8 mmol, 2.0 equiv) was added. The mixture was stirred for 2 h under a N<sub>2</sub> atm. The mixture was diluted with dichloromethane and basified with NaOH (10%, aq). The heterogenous mixture was stirred vigorously for 15 mins. The organic and aqueous layers were separated. The aqueous layer was extracted with dichloromethane twice. The combined organic layer was dried over Na<sub>2</sub>SO<sub>4</sub>. Solvent was removed *in vacuo*. Yield of the product remaining was determined by <sup>1</sup>H NMR using 1,1,2,2-tetrachloroethane as internal standard indicating a 10% recovery.

## 9.3 Synthesis of $\alpha$ -tertiary amines: general procedures

### 9.3.1 General procedure H (Ketone scope-non-alkylamines)

An oven dried vial (Biotage Microwave Process Vial 10 mL, equipped with gas-tight pierceable caps) was charged with a stirring bar, the aniline (0.4 mmol, 1 equiv), Zn dust (79 mg, 1.2 mmol, 3 equiv) and copper iodide (7.5 mg, 0.04 mmol, 10 mol%). The vial was sealed, evacuated and backfilled with N<sub>2</sub>. To this was added 0.25 mL dry dichloromethane or toluene. While stirring, the ketone (0.6 mmol, 1.5 equiv) was added dropwise, followed by the alkyl iodide (1.2 mmol, 3 equiv). H<sub>2</sub>O (11  $\mu$ L, 0.6 mmol, 1.5 equiv) and then TMSOTf (109  $\mu$ L, 0.6 mmol, 1.5 equiv) were added. The mixture was stirred overnight. The mixture was diluted with dichloromethane and basified with NaOH (10%, aq). The heterogenous mixture was stirred vigorously for 15 min. The organic and aqueous layers were separated. The aqueous layer was extracted with dichloromethane twice. The combined organic layer was dried over Na<sub>2</sub>SO<sub>4</sub>. Solvent was removed under reduced pressure. The crude mixture was purified by column chromatography.

### 9.3.2 General procedure I (Ketone scope -alkylamines)

An oven dried vial (Biotage Microwave Process Vial 10 mL, equipped with gas-tight pierceable caps) was charged with a stirring bar, the amine HCl salt (0.4 mmol, 1 equiv), Zn dust (79 mg, 1.2 mmol, 3 equiv) and copper iodide (7.5 mg, 0.04 mmol, 10 mol%). The vial was sealed, evacuated and backfilled with N<sub>2</sub>. To this was added 0.25 mL dry dichloromethane or toluene. While stirring, the ketone (0.6 mmol, 1.5 equiv) was added dropwise, followed by the alkyl iodide (1.2 mmol, 3 equiv). Then H<sub>2</sub>O (11  $\mu$ L, 0.6 mmol, 1.5 equiv) and TMSOTf (109  $\mu$ L, 0.6 mmol, 1.5 equiv) were added. The mixture was stirred overnight. The mixture was diluted with dichloromethane and basified with NaOH (10%, aq). The heterogenous mixture was stirred vigorously for 15 mins. The organic and aqueous layers were separated. The aqueous layer was extracted with dichloromethane twice. The combined organic layer was dried over Na<sub>2</sub>SO<sub>4</sub>. Solvent was removed under reduced pressure. The crude mixture was purified by column chromatography.

### 9.3.3 General procedure J (Oxetane scope)

An oven dried vial (Biotage Microwave Process Vial 10 mL, equipped with gas-tight pierceable caps) was charged with a stirring bar, the aniline (2 mmol, 1.0 equiv), Zn dust (3 mmol, 3.0 equiv) and copper iodide (1 mmol, 50 mol%). The vial was sealed, evacuated, and backfilled with N<sub>2</sub>. To this was added 2.5 mL anhydrous dichloromethane. While stirring, HFIP (500  $\mu$ L) then oxetan-3-one (5.0 mmol, 2.5 equiv) was added. The reaction mixture was stirred for 30 minutes at 1100 rpm. Alkyl iodide (8 mmol, 4.0 equiv) was added, followed by TMSOTf (4.0 mmol, 2.0 equiv). The mixture was stirred for 14 h under a N<sub>2</sub> atm. The mixture was diluted with dichloromethane and basified with NaOH (10%, aq). The heterogenous mixture was stirred vigorously for 15 mins. The organic and aqueous layers were separated. The aqueous layer was extracted with dichloromethane twice. The combined organic layer was dried over Na<sub>2</sub>SO<sub>4</sub>. Solvent was removed *in vacuo*. The crude mixture was purified by column chromatography using alumina or reverse phase column chromatography.

## 9.4 Synthesis of $\alpha$ -tertiary amines: reaction scope

### N-(2,3-dimethylbutan-2-yl)-4-methoxyaniline (17a)

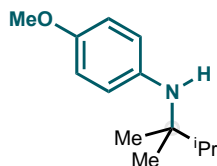

N-(2,3-dimethylbutan-2-yl)-4-methoxyaniline was prepared according to General Procedure **H** using Zn (79 mg, 1.2 mmol, 3 equiv), *p*-anisidine (49 mg, 0.4 mmol, 1 equiv), copper iodide (7.5 mg, 0.04 mmol, 10 mol%), acetone (44  $\mu$ L, 0.6 mmol, 1.5 equiv) and 2-iodopropane (120  $\mu$ L, 1.2 mmol, 3 equiv) in toluene (0.25 mL). Crude material was purified by column chromatography (20% dichloromethane in Pet. Ether (with 4% NEt<sub>3</sub>)) yielding the product as a brown oil (72 mg, 87%).

**<sup>1</sup>H NMR** (400 MHz, CDCl<sub>3</sub>):  $\delta$  6.80 - 6.62 (m, 4H), 3.75 (s, 3H), 2.96 (brs, 1H), 1.91 (sept, *J* = 6.8 Hz, 1H), 1.15 (s, 6H), 0.94 (d, *J* = 6.8 Hz, 6H).

**<sup>13</sup>C NMR** (100 MHz, CDCl<sub>3</sub>):  $\delta$  153.7, 140.2, 121.6, 114.3, 57.2, 55.7, 36.2, 25.1, 17.8.

**IR** (film, cm<sup>-1</sup>): 3403 (br), 2960, 2875, 2832, 1507, 1464, 1236, 1039, 818.

**HRMS**: *m/z* calcd for C<sub>13</sub>H<sub>21</sub>NO [M+H]<sup>+</sup> 208.1696, found 208.1701.

### N-(2,3-dimethylbutan-2-yl)aniline (17b)

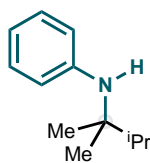

N-(2,3-dimethylbutan-2-yl)aniline was prepared according to General Procedure **H** using Zn (79 mg, 1.2 mmol, 3 equiv), aniline (37 mg, 0.4 mmol, 1 equiv), copper iodide (7.5 mg, 0.04 mmol, 10 mol%), acetone (44  $\mu$ L, 0.6 mmol, 1.5 equiv) and 2-iodopropane (120  $\mu$ L, 1.2 mmol, 3 equiv) in toluene (0.25 mL). Crude material was purified by column chromatography (10% dichloromethane in Pet. Ether (with 4% NEt<sub>3</sub>)) yielding the product as a brown oil (58 mg, 82%).

**<sup>1</sup>H NMR** (400 MHz, CDCl<sub>3</sub>):  $\delta$  7.17 - 7.10 (m, 2H) 7.76 - 7.69 (m, 3H), 3.44 (brs, 1H), 2.13 (sept, *J* = 6.8 Hz, 1H), 1.26 (s, 6H), 0.94 (d, *J* = 6.8 Hz, 6H).

**<sup>13</sup>C NMR** (100 MHz, CDCl<sub>3</sub>):  $\delta$  146.9, 129.1, 117.9, 117.1, 56.8, 35.7, 25.1, 17.7.

**IR** (film, cm<sup>-1</sup>): 3412 (br), 3053, 2970, 2875, 1600, 1496, 1468, 1428, 1391, 1378, 1367, 1332, 1312, 1259, 1196, 1179, 1147, 1105, 1081, 1032, 747, 692.

**HRMS**: *m/z* calcd for C<sub>12</sub>H<sub>19</sub>N [M+H]<sup>+</sup> 178.1591; found 178.1591.



#### 4-bromo-N-(2,3-dimethylbutan-2-yl)aniline (17c)

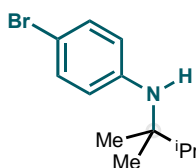

4-bromo-N-(2,3-dimethylbutan-2-yl)aniline was prepared according to General Procedure **H** using Zn (79 mg, 1.2 mmol, 3 equiv), 4-bromoaniline (69 mg, 0.4 mmol, 1 equiv), copper iodide (7.5 mg, 0.04 mmol, 10 mol%), acetone (44  $\mu$ L, 0.6 mmol, 1.5 equiv) and 2-iodopropane (120  $\mu$ L, 1.2 mmol, 3 equiv) in toluene (0.25 mL). Crude material was purified by column chromatography (10% dichloromethane in Pet. Ether (4% NEt<sub>3</sub>)) yielding the product as a brown oil (95 mg, 93%).

**<sup>1</sup>H NMR** (400 MHz, CDCl<sub>3</sub>):  $\delta$  7.20 (d, *J* = 8.0 Hz, 2H), 6.59 (d, *J* = 7.9 Hz, 2H), 3.75 - 3.14 (brs, 1H), 2.10 (sept, *J* = 6.6 Hz, 1H), 1.24 (s, 6H), 0.92 (d, *J* = 6.6 Hz, 6H).

**<sup>13</sup>C NMR** (100 MHz, CDCl<sub>3</sub>):  $\delta$  146.1, 131.8, 118.2, 109.4, 56.8, 35.5, 25.0, 17.7.

**IR** (film, cm<sup>-1</sup>): 3416 (br), 2969, 2875, 1589, 1488, 1314, 1177, 810.

**HRMS**: *m/z* calcd for C<sub>12</sub>H<sub>18</sub>BrN [M+H]<sup>+</sup> 256.0696, 258.0675; found 256.0698, 258.0678.

#### N-(2,3-dimethylbutan-2-yl)-4-iodoaniline (17d)

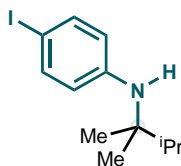

N-(2,3-dimethylbutan-2-yl)-4-iodoaniline was prepared according to General Procedure **H** using Zn (79 mg, 1.2 mmol, 3 equiv), 4-iodoaniline (88 mg, 0.4 mmol, 1 equiv), copper iodide (7.5 mg, 0.04 mmol, 10 mol%), acetone (44  $\mu$ L, 0.6 mmol, 1.5 equiv) and 2-iodopropane (120  $\mu$ L, 1.2 mmol, 3 equiv) in toluene (0.25 mL). Crude material was purified by column chromatography (4% dichloromethane in Pet. Ether (with 4% NEt<sub>3</sub>)) yielding the product as a brown oil (117 mg, 96%).

**<sup>1</sup>H NMR** (400 MHz, CDCl<sub>3</sub>):  $\delta$  7.38 (d, *J* = 7.8 Hz, 2H), 6.50 (d, *J* = 7.9 Hz, 2H), 3.70 - 3.24 (brs, 1H), 2.12 (sept, *J* = 6.8 Hz, 1H), 1.25 (s, 6H), 0.93 (d, *J* = 6.7 Hz, 6H).

**<sup>13</sup>C NMR** (100 MHz, CDCl<sub>3</sub>):  $\delta$  146.6, 137.6, 118.5, 78.2, 56.8, 35.3, 24.9, 17.6.

**IR** (film, cm<sup>-1</sup>): 3412 (br), 2966, 2874, 1587, 1484, 1392, 1314, 1295, 1256, 1179, 808.

**HRMS**: *m/z* calcd for C<sub>12</sub>H<sub>18</sub>IN [M+H]<sup>+</sup> 304.0557; found 304.0563.

### Ethyl 3-((2,3-dimethylbutan-2-yl)amino)benzoate (17e)

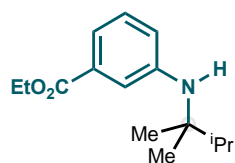

Ethyl 3-((2,3-dimethylbutan-2-yl)amino)benzoate was prepared according to General Procedure **H** using Zn (79 mg, 1.2 mmol, 3 equiv), ethyl 3-aminobenzoate (60  $\mu$ L, 0.4 mmol, 1 equiv), copper iodide (7.5 mg, 0.04 mmol, 10 mol%), acetone (44  $\mu$ L, 0.6 mmol, 1.5 equiv) and 2-iodopropane (120  $\mu$ L, 1.2 mmol, 3 equiv) in toluene (0.25 mL). Crude material was purified by column chromatography (8 % dichloromethane in Pet. Ether (with 4% NEt<sub>3</sub>)) yielding the product as a brown oil (85 mg, 85%).

<sup>1</sup>H NMR (400 MHz, CDCl<sub>3</sub>):  $\delta$  7.39 - 7.32 (m, 2H), 7.17 (t, J = 7.5 Hz, 1H), 6.88 (d, J = 8.3 Hz, 1H), 4.34 (q, J = 6.6 Hz, 2H), 3.70 - 3.58 (brs, 1H), 2.14 (sept, J = 6.8 Hz, 1H), 1.38 (t, J = 6.8 Hz, 3H), 1.27 (s, 6H), 0.93 (d, J = 6.8 Hz, 6H).

<sup>13</sup>C NMR (100 MHz, CDCl<sub>3</sub>):  $\delta$  167.2, 147.1, 131.2, 128.9, 120.5, 118.6, 117.2, 60.9, 56.8, 35.5, 25.0, 17.7, 14.5.

IR (film, cm<sup>-1</sup>): 3398 (br), 2973, 2875, 1709, 1603, 1586, 1480, 1430, 1392, 1367, 1342, 1277, 1239, 1198, 1147, 1105, 1081, 1027, 753.

HRMS: m/z calcd for C<sub>15</sub>H<sub>23</sub>NO<sub>2</sub> [M+H]<sup>+</sup> 250.1802; found 250.1806.

### 3-bromo-N-(2,3-dimethylbutan-2-yl)aniline (17f)

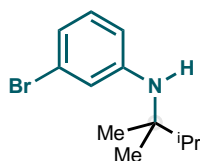

3-bromo-N-(2,3-dimethylbutan-2-yl)aniline was prepared according to General Procedure **H** using Zn (79 mg, 1.2 mmol, 3 equiv), 3-bromoaniline (44  $\mu$ L, 0.4 mmol, 1 equiv), copper iodide (7.5 mg, 0.04 mmol, 10 mol%), acetone (44  $\mu$ L, 0.6 mmol, 1.5 equiv) and 2-iodopropane (120  $\mu$ L, 1.2 mmol, 3 equiv) in toluene (0.25 mL). Crude material was purified by column chromatography (10% dichloromethane in Pet. Ether (with 4% NEt<sub>3</sub>)) yielding the product as a brown oil (92 mg, 90%).

<sup>1</sup>H NMR (700 MHz, CDCl<sub>3</sub>):  $\delta$  6.97 (t, J = 8.0 Hz, 1H), 6.84 (s, 1H), 6.79 (d, J = 7.8 Hz, 1H), 6.60 (d, J = 7.9 Hz, 1H), 3.67-3.48 (brs, 1H), 2.13 (sept, J = 6.8 Hz, 1H), 1.25 (s, 6H), 0.92 (d, J = 6.9 Hz, 6H).

<sup>13</sup>C NMR (175 MHz, CDCl<sub>3</sub>):  $\delta$  148.4, 130.3, 123.0, 120.1, 118.5, 114.7, 56.8, 35.4, 25.0, 17.7.

IR (film, cm<sup>-1</sup>): 3416 (br), 2970, 2875, 1591, 1574, 1504, 1478, 1392, 1196, 986, 760, 683.

HRMS: m/z calcd for C<sub>12</sub>H<sub>18</sub>BrN [M+H]<sup>+</sup> 256.0696, 258.0675; found 256.0697, 258.0677.

### N-(2,3-dimethylbutan-2-yl)-2-methylaniline (17g)

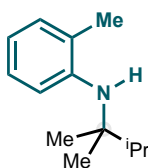

N-(2,3-dimethylbutan-2-yl)-2-methylaniline was prepared according to General Procedure **H** using Zn (79 mg, 1.2 mmol, 3 equiv), toluidine (43  $\mu$ L, 0.4 mmol, 1 equiv), copper iodide (7.5 mg, 0.04 mmol, 10 mol%), acetone (44  $\mu$ L, 0.6 mmol, 1.5 equiv) and 2-iodopropane (120  $\mu$ L, 1.2 mmol, 3 equiv) in toluene (0.25 mL). Crude material was purified by column chromatography (2% dichloromethane in Pet. Ether (with 4% NEt<sub>3</sub>)) yielding the product as a brown oil (38 mg, 50%).

**<sup>1</sup>H NMR** (400 MHz, CDCl<sub>3</sub>):  $\delta$  7.11 - 7.02 (m, 2H), 6.90 (d, J = 8.2 Hz, 1H), 6.63 (t, J = 7.2 Hz, 1H), 3.62 - 3.16 (brs, 1H), 2.25 (sept, J = 6.7 Hz, 1H), 2.15 (s, 3H), 1.33 (s, 6H), 0.96 (d, J = 6.7 Hz, 6H).

**<sup>13</sup>C NMR** (100 MHz, CDCl<sub>3</sub>):  $\delta$  145.0, 130.6, 126.7, 123.1, 116.6, 113.5, 56.4, 35.7, 25.2, 18.3, 17.7.

**IR** (film, cm<sup>-1</sup>): 3448 (br), 2962, 2874, 1605, 1586, 1480, 1444, 1391, 1378, 1367, 1338, 1313, 1262, 1201, 1180, 1147, 1052, 907, 742.

**HRMS**: m/z calcd for C<sub>13</sub>H<sub>21</sub>N [M+H]<sup>+</sup> 192.1747, found 192.1749.

### methyl 4-((2,3-dimethylbutan-2-yl)amino)-2-methoxybenzoate (17h)

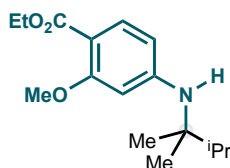

methyl 4-((2,3-dimethylbutan-2-yl)amino)-2-methoxybenzoate was prepared according to General Procedure **H** using Zn (79 mg, 1.2 mmol, 3 equiv), methyl 4-amino-2-methoxybenzoate (73 mg, 0.4 mmol, 1 equiv), copper iodide (7.5 mg, 0.04 mmol, 10 mol%), acetone (44  $\mu$ L, 0.6 mmol, 1.5 equiv) and 2-iodopropane (120  $\mu$ L, 1.2 mmol, 3 equiv) in toluene (0.25 mL). Crude material was purified by column chromatography (0-40% Et<sub>2</sub>O in Pet. Ether) yielding the product as an amorphous solid (45 mg, 42%).

**<sup>1</sup>H NMR** (700 MHz, CDCl<sub>3</sub>):  $\delta$  7.70 (d, J = 8.8 Hz, 1H), 6.23 (dd, J = 8.7, 2.1 Hz, 1H), 6.14 (d, J = 2.3 Hz, 1H), 4.05 (brs, 1H), 3.86 (s, 3H), 3.81 (s, 3H), 2.22 (sept, J = 6.8 Hz, 1H), 1.33 (s, 6H), 0.96 (d, J = 6.6 Hz, 6H).

**<sup>13</sup>C NMR** (176 MHz, CDCl<sub>3</sub>):  $\delta$  166.3, 161.5, 152.2, 133.8, 107.1, 106.4, 97.7, 56.84, 55.77, 51.3, 35.4, 24.8, 17.6.

**IR** (solid, cm<sup>-1</sup>): 3366, 2920, 2245, 1695, 1608, 1462, 1362, 1258, 1233, 1175, 1104, 1029, 912, 820, 762, 712, 658, 554, 479.

**HRMS**: m/z calcd for C<sub>15</sub>H<sub>23</sub>NO<sub>3</sub> [M+H]<sup>+</sup> 266.1751, found 266.1753.

### Benzyl 4-isopropyl-4-(phenethylamino)piperidine-1-carboxylate (18a)

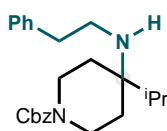

Benzyl 4-isopropyl-4-(phenethylamino)piperidine-1-carboxylate was prepared according to General Procedure I using Zn (79 mg, 1.2 mmol, 3 equiv), 2-phenylethan-1-amine hydrochloride (63 mg, 0.4 mmol, 1 equiv), copper iodide (7.5 mg, 0.04 mmol, 10 mol%), benzyl 4-oxopiperidine-1-carboxylate (140 mg, 0.6 mmol, 1.5 equiv) and 2-iodopropane (120  $\mu$ L, 1.2 mmol, 3 equiv) in dichloromethane (0.25 mL). Crude material was purified column chromatography (1–5% MeOH in dichloromethane (with 5% NEt<sub>3</sub>)) yielding the product (102 mg, 67%) as a pale-yellow oil.

<sup>1</sup>H NMR  $\delta$  7.41 – 7.37 (m, 4H), 7.35 – 7.28 (m, 3H), 7.25 – 7.21 (m, 3H), 5.15 (s, 2H), 4.00 – 3.75 (m, 2H), 3.23 – 3.03 (m, 2H), 2.78 – 2.64 (m, 4H), 1.81 (sept,  $J$  = 6.8 Hz, 1H), 1.57 – 1.46 (m, 2H), 1.40 – 1.24 (m, 2H), 0.78 (d,  $J$  = 6.9 Hz, 6H).

<sup>13</sup>C NMR (126 MHz, CDCl<sub>3</sub>):  $\delta$  155.4, 140.4, 137.1, 128.8, 128.44, 128.39, 127.9, 127.8, 126.2, 66.8, 41.7, 39.5, 37.4, 32.5, 30.0, 16.6.

IR (film, cm<sup>-1</sup>): 2955, 2875, 1692, 1426, 1227, 1111, 751, 697.

HRMS:  $m/z$  calcd for C<sub>24</sub>H<sub>33</sub>N<sub>2</sub>O<sub>2</sub> [M+H]<sup>+</sup> 381.2537; found 381.2536.

### Benzyl 4-((2-fluoroethyl)amino)-4-isopropylpiperidine-1-carboxylate (18b)

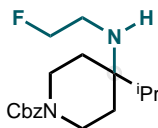

Benzyl 4-isopropyl-4-((2-(thiophen-2-yl)ethyl)amino)piperidine-1-carboxylate was prepared according to General Procedure I using Zn (79 mg, 1.2 mmol, 2-fluoroethan-1-amine hydrochloride (40 mg, 0.4 mmol, 1 equiv), copper iodide (7.5 mg, 0.04 mmol, 10 mol%), benzyl 4-oxopiperidine-1-carboxylate (140 mg, 0.6 mmol, 1.5 equiv) and 2-iodopropane (120  $\mu$ L, 1.2 mmol, 3 equiv) in 0 dichloromethane (0.25 mL). Crude material was purified column chromatography (5–20% EtOAc in Pet. Ether (with 5% NEt<sub>3</sub>)) yielding the product as a colourless oil (80 mg, 62%).

<sup>1</sup>H NMR (500 MHz, CDCl<sub>3</sub>)  $\delta$  7.38 – 7.33 (m, 4H), 7.32 – 7.28 (m, 1H), 5.12 (s, 2H), 4.59 – 4.44 (m, 2H), 3.95 – 3.81 (m, 2H), 3.25 – 3.13 (m, 2H), 2.72 (dt,  $J$  = 27.9, 4.8 Hz, 2H), 1.79 (sept,  $J$  = 6.9 Hz, 1H), 1.56 (s, 2H), 1.30 (d,  $J$  = 19.0 Hz, 2H), 1.13 (s, 1H), 0.85 (d,  $J$  = 6.9 Hz, 6H).

<sup>13</sup>C NMR 126 MHz, CDCl<sub>3</sub>)  $\delta$  155.4, 137.1, 128.5, 127.9, 127.8, 84.6 (d,  $J$  = 165.3 Hz), 66.9, 54.0, 40.6 (d,  $J$  = 19.8 Hz), 39.5, 32.7, 29.9, 16.6.

<sup>19</sup>F NMR (471 MHz, CDCl<sub>3</sub>)  $\delta$  -224.2.

IR (film, cm<sup>-1</sup>): 3340, 2955, 2877, 1691, 1427, 1241, 1111, 1034, 746, 697.

HRMS:  $m/z$  calcd for C<sub>18</sub>H<sub>27</sub>FN<sub>2</sub>NaO<sub>2</sub> [M+Na]<sup>+</sup> 345.1949; found 345.1948.

### Benzyl 4-((2-chloroethyl)amino)-4-isopropylpiperidine-1-carboxylate (18c)

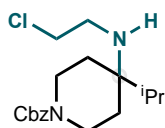

Benzyl 4-isopropyl-4-((2-(thiophen-2-yl)ethyl)amino)piperidine-1-carboxylate was prepared according to General Procedure I using Zn (79 mg, 1.2 mmol), 2-chloroethan-1-amine hydrochloride (46 mg, 0.4 mmol, 1 equiv), copper iodide (7.5 mg, 0.04 mmol, 10 mol%), benzyl 4-oxopiperidine-1-carboxylate (140 mg, 0.6 mmol, 1.5 equiv) and 2-iodopropane (120  $\mu$ L, 1.2 mmol, 3 equiv) in dichloromethane (0.25 mL). Crude material was purified column chromatography (0-30% EtOAc in Pet. Ether), yielding the product as an amorphous solid (50 mg, 37%)

**$^1\text{H}$  NMR** (400 MHz,  $\text{CDCl}_3$ ):  $\delta$  7.41 - 7.30 (m, 5H), 5.15 (s, 2H), 4.00 - 3.84 (m, 2H), 3.65 (t,  $J$  = 11.3 Hz, 2H), 3.28 - 3.15 (m, 2H), 2.82 (t,  $J$  = 11.3 Hz, 2H), 1.80 (sept,  $J$  = 6.9 Hz, 1H), 1.67-1.50 (m, 2H), 1.46 - 1.15 (m, 2H), 0.89 (d,  $J$  = 6.9 Hz, 6H).

**$^{13}\text{C}$  NMR** (100 MHz,  $\text{CDCl}_3$ ):  $\delta$  155.4, 137.1, 128.5, 127.9, 127.8, 66.9, 54.2, 46.2, 42.1, 39.5, 32.9, 30.1, 16.6.

**IR** (solid,  $\text{cm}^{-1}$ ): 3375, 2979, 2833, 1695, 1583, 1525, 1441, 1345, 1295, 1208, 1175, 1075, 1037, 895, 812, 775, 704.

**HRMS**:  $m/z$  calcd for  $\text{C}_{18}\text{H}_{27}\text{ClN}_2\text{O}_2$  [ $\text{M}+\text{H}$ ] $^+$  339.1834, found 339.1831.

### Benzyl 4-isopropyl-4-(methylamino)piperidine-1-carboxylate (18d)

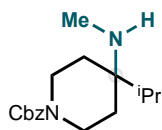

Benzyl 4-isopropyl-4-(phenethylamino)piperidine-1-carboxylate was prepared according to General Procedure I using Zn (79 mg, 1.2 mmol, 3 equiv), methylamine hydrochloride (27 mg, 0.4 mmol, 1 equiv), copper iodide (7.5 mg, 0.04 mmol, 10 mol%), benzyl 4-oxopiperidine-1-carboxylate (140 mg, 0.6 mmol, 1.5 equiv) and 2-iodopropane (120  $\mu$ L, 1.2 mmol, 3 equiv) in dichloromethane (0.25 mL). Crude material was purified column chromatography (1-5% MeOH in dichloromethane (with 5%  $\text{NEt}_3$ )) yielding the product (72 mg, 62%) as a colourless oil.

**$^1\text{H}$  NMR** (500 MHz,  $\text{CDCl}_3$ )  $\delta$  7.40 - 7.35 (m, 4H), 7.34 - 7.30 (m, 1H), 5.14 (s, 2H), 4.00 - 3.83 (m, 2H), 3.26 - 3.12 (m, 2H), 2.23 (s, 3H), 1.88 (sept,  $J$  = 6.9 Hz, 1H), 1.64 - 1.49 (m, 2H), 1.44 - 1.26 (m, 2H), 1.02 (brs, 1H), 0.86 (d,  $J$  = 6.9 Hz, 6H).

**$^{13}\text{C}$  NMR** (126 MHz,  $\text{CDCl}_3$ ):  $\delta$  155.3, 137.0, 128.5, 127.9, 127.8, 66.9, 54.6, 39.2, 33.6, 30.2, 30.0, 16.6.

**IR** (film,  $\text{cm}^{-1}$ ): 2954, 1690, 1426, 1277, 1229, 1104, 1028, 731, 696.

**HRMS**:  $m/z$  calcd for  $\text{C}_{17}\text{H}_{26}\text{N}_2\text{NaO}_2$  [ $\text{M}+\text{Na}$ ] $^+$  313.1887; found 313.1893.

### Benzyl 4-(benzylamino)-4-isopropylpiperidine-1-carboxylate (18e)

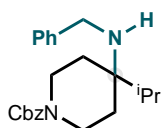

Benzyl 4-(benzylamino)-4-isopropylpiperidine-1-carboxylate was prepared according to General Procedure I using Zn (79 mg, 1.2 mmol, 3 equiv), benzylamine hydrochloride (57 mg, 0.4 mmol, 1 equiv), copper iodide (7.5 mg, 0.04 mmol, 10 mol%), benzyl 4-oxopiperidine-1-carboxylate (140 mg, 0.6 mmol, 1.5 equiv) and 2-iodopropane (120  $\mu$ L, 1.2 mmol, 3 equiv) in dichloromethane (0.25 mL). Crude material was purified by column chromatography (5–20% EtOAc in Pet. Ether (with 5% NEt<sub>3</sub>)) yielding the product (85 mg, 58%) as a pale-yellow oil.

<sup>1</sup>H NMR (500 MHz, CDCl<sub>3</sub>)  $\delta$  7.43 – 7.38 (m, 6H), 7.38 – 7.32 (m, 3H), 7.31 – 7.26 (m, 1H), 5.17 (s, 2H), 4.09 – 3.88 (m, 2H), 3.64 (s, 2H), 3.43 – 3.25 (m, 2H), 2.00 (sept, J = 6.9 Hz, 1H), 1.75 – 1.56 (m, 2H), 1.52 – 1.37 (m, 2H), 0.94 (d, J = 6.9 Hz, 6H).

<sup>13</sup>C NMR (126 MHz, CDCl<sub>3</sub>):  $\delta$  155.4, 141.4, 137.1, 128.5, 128.4, 128.2, 127.9, 127.8, 126.9, 66.9, 54.6, 44.9, 39.6, 32.6, 30.0, 16.7.

IR (film, cm<sup>-1</sup>): 2955, 2875, 1692, 1466, 1427, 1278, 1241, 1110, 1086, 1029, 736, 697.

HRMS: m/z calcd for C<sub>23</sub>H<sub>31</sub>N<sub>2</sub>O<sub>2</sub> [M+H]<sup>+</sup> 367.2381; found 367.2382.

### Benzyl 4-(but-3-en-1-ylamino)-4-isopropylpiperidine-1-carboxylate (18f)

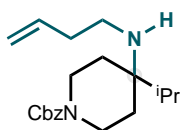

Benzyl 4-(but-3-en-1-ylamino)-4-isopropylpiperidine-1-carboxylate was prepared according to General Procedure I using Zn (79 mg, 1.2 mmol, 3 equiv), but-3-en-1-amine hydrochloride (43 mg, 0.4 mmol, 1 equiv), copper iodide (7.5 mg, 0.04 mmol, 10 mol%), benzyl 4-oxopiperidine-1-carboxylate (140 mg, 0.6 mmol, 1.5 equiv) and 2-iodopropane (120  $\mu$ L, 1.2 mmol, 3 equiv) in dichloromethane (0.25 mL). Crude material was purified column chromatography (5–20% EtOAc in Pet. Ether (with 5% NEt<sub>3</sub>)) yielding the product as a colourless oil (41 mg, 31%).

<sup>1</sup>H NMR (500 MHz, CDCl<sub>3</sub>)  $\delta$  7.38 – 7.33 (m, 3H), 7.32 – 7.28 (m, 1H), 5.80 (ddt, J = 17.1, 10.2, 6.9 Hz, 1H), 5.20 – 4.89 (m, 4H), 4.00 – 3.76 (m, 2H), 3.23 – 3.09 (m, 2H), 2.48 (t, J = 6.7 Hz, 2H), 2.20 (qt, J = 8.2, 2.1 Hz, 2H), 1.81 (sept, J = 6.9 Hz, 1H), 1.56 – 1.48 (m, 2H), 1.38 – 1.15 (m, 2H), 0.83 (d, J = 6.9 Hz, 6H).

<sup>13</sup>C NMR (126 MHz, CDCl<sub>3</sub>)  $\delta$  155.4, 137.1, 137.0, 128.4, 127.84, 127.79, 116.2, 66.8, 54.1, 39.6, 39.3, 35.3, 32.4, 30.0, 16.7.

IR (film, cm<sup>-1</sup>): 2955, 2876, 1694, 1428, 1277, 1240, 1108, 1037, 746, 697.

HRMS: m/z calcd for C<sub>20</sub>H<sub>31</sub>N<sub>2</sub>O<sub>2</sub> [M+H]<sup>+</sup> 331.2381; found 331.2375.

## Benzyl 4-isopropyl-4-((2-(thiophen-2-yl)ethyl)amino)piperidine-1-carboxylate (18g)

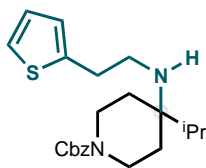

Benzyl 4-isopropyl-4-((2-(thiophen-2-yl)ethyl)amino)piperidine-1-carboxylate was prepared according to General Procedure **I** using Zn (78.5 mg, 1.2 mmol, 3 equiv), 2-(thiophen-2-yl)ethan-1-amine hydrochloride (66 mg, 0.4 mmol, 1 equiv), copper iodide (7.5 mg, 0.04 mmol, 10 mol%), benzyl 4-oxopiperidine-1-carboxylate (140 mg, 0.6 mmol, 1.5 equiv) and 2-iodopropane (120  $\mu$ L, 1.2 mmol, 3 equiv) in dichloromethane (0.25 mL). Crude material was purified column chromatography (5–20% EtOAc in Pet. Ether (with 5% NEt<sub>3</sub>)) yielding the product as a colourless oil (73 mg, 47%).

**<sup>1</sup>H NMR** (500 MHz, CDCl<sub>3</sub>)  $\delta$  7.42 – 7.37 (m, 4H), 7.35 – 7.28 (m, 1H), 7.19 – 7.13 (m, 1H), 6.99 – 6.93 (m, 1H), 6.88 – 6.83 (m, 1H), 5.15 (s, 2H), 3.95 – 3.80 (m, 2H), 3.25 – 3.11 (m, 2H), 2.99 (t, J = 6.5 Hz, 2H), 2.74 (t, J = 6.7 Hz, 2H), 1.82 (sept, J = 7.0 Hz, 1H), 1.60 – 1.49 (m, 2H), 1.44 – 1.22 (m, 2H), 0.81 (d, J = 6.9 Hz, 6H).

**<sup>13</sup>C NMR** (126 MHz, CDCl<sub>3</sub>)  $\delta$  155.3, 142.9, 137.1, 128.4, 127.8, 127.74, 126.65, 125.0, 123.6, 66.8, 54.2, 41.8, 39.5, 32.5, 31.5, 29.9, 16.6.

**IR** (film, cm<sup>-1</sup>): 2955, 2875, 1692, 1427, 1277, 1237, 1108, 1087, 695.

**HRMS**: m/z calcd for C<sub>22</sub>H<sub>31</sub>N<sub>2</sub>O<sub>2</sub>S [M+H]<sup>+</sup> 387.2101; found 387.2102.

## N-(1-isopropylcyclobutyl)-4-methoxyaniline (19a)

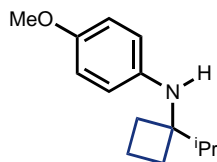

N-(1-isopropylcyclobutyl)-4-methoxyaniline was prepared according to General Procedure **H** using Zn (79 mg, 1.2 mmol, 3 equiv), *p*-anisidine (49 mg, 0.4 mmol, 1 equiv), copper iodide (7.5 mg, 0.04 mmol, 10 mol%), cyclobutanone (45  $\mu$ L, 0.6 mmol, 1.5 equiv) and 2-iodopropane (120  $\mu$ L, 1.2 mmol, 3 equiv) in toluene (0.25 mL). Crude material was purified by column chromatography (10–20% dichloromethane in Pet. Ether (with 4% NEt<sub>3</sub>)) yielding the product as a brown oil (82 mg, 93%).

**<sup>1</sup>H NMR** (400 MHz, CDCl<sub>3</sub>):  $\delta$  6.78 - 6.72 (m, 2H), 6.55 - 6.47 (m, 2H), 3.75 (s, 3H), 3.42 (brs, 1H), 2.30 - 2.20 (m, 3H), 2.11 - 1.91 (m, 3H), 1.80 - 1.69 (m, 1H), 0.94 (d, J = 6.8 Hz, 6H).

**<sup>13</sup>C NMR** (100 MHz, CDCl<sub>3</sub>):  $\delta$  151.8, 140.3, 115.9, 114.8, 62.0, 55.9, 30.9, 29.3, 17.1, 14.8.

**IR** (film, cm<sup>-1</sup>): 3398 (br), 2954, 2871, 2829, 1506, 1463, 1440, 1231, 1037, 817, 750.

**HRMS**: m/z calcd for C<sub>14</sub>H<sub>21</sub>NO [M+H]<sup>+</sup> 220.1696, found 220.1699.

### N-(1-isopropylcyclopentyl)-4-methoxyaniline (19b)

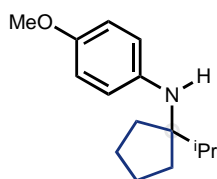

N-(1-isopropylcyclopentyl)-4-methoxyaniline was prepared according to General Procedure **H** using Zn (79 mg, 1.2 mmol, 3 equiv), *p*-anisidine (49 mg, 0.4 mmol, 1 equiv), copper iodide (7.5 mg, 0.04 mmol, 10 mol%), cyclopentanone (53  $\mu$ L, 0.6 mmol, 1.5 equiv) and 2-iodopropane (120  $\mu$ L, 1.2 mmol, 3 equiv) in toluene (0.25 mL). Crude material was purified by column chromatography (10-15% dichloromethane in Pet. Ether (with 4% NEt<sub>3</sub>)) yielding the product as a brown oil (61 mg, 65%).

**<sup>1</sup>H NMR** (400 MHz, CDCl<sub>3</sub>):  $\delta$  6.76 - 6.70 (m, 2H), 6.67 - 6.60 (m, 2H), 3.74 (s, 3H), 3.45-2.5 (brs, 1H), 2.38 (sept, *J* = 6.8 Hz, 1H), 1.84 - 1.66 (m, 6H), 1.64 - 1.53 (m, 2H), 0.90 (d, *J* = 6.8 Hz, 6H).

**<sup>13</sup>C NMR** (100 MHz, CDCl<sub>3</sub>):  $\delta$  152.0, 140.8, 117.1, 114.5, 68.6, 55.9, 35.6, 31.9, 25.6, 18.2.

**IR** (film, cm<sup>-1</sup>): 3402 (br), 2955, 2869, 1508, 1465, 1236, 1041, 818.

**HRMS**: *m/z* calcd for C<sub>15</sub>H<sub>23</sub>NO [M+H]<sup>+</sup> 234.1853; found 234.1854.

### N-(1-isopropylcyclohexyl)-4-methoxyaniline (19c)

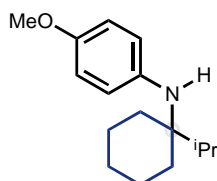

N-(1-isopropylcyclohexyl)-4-methoxyaniline was prepared according to General Procedure **H** using Zn (79 mg, 1.2 mmol, 3 equiv), *p*-anisidine (49 mg, 0.4 mmol, 1 equiv), copper iodide (7.5 mg, 0.04 mmol, 10 mol%), cyclohexanone (62  $\mu$ L, 0.6 mmol, 1.5 equiv) and 2-iodopropane (120  $\mu$ L, 1.2 mmol, 3 equiv) in toluene (0.25 mL). Crude material was purified by column chromatography (3-4% dichloromethane in Pet. Ether (with 4% NEt<sub>3</sub>)) yielding the product as a brown oil (76 mg, 77%).

**<sup>1</sup>H NMR** (400 MHz, CDCl<sub>3</sub>):  $\delta$  6.77 - 6.66 (m, 4H), 3.75 (s, 3H), 3.11 (brs, 1H), 2.11 (sept, *J* = 6.9 Hz, 1H), 1.76 - 1.67 (m, 2H), 1.68 - 1.42 (m, 7H), 1.27 - 1.14 (m, 1H), 0.90 (d, *J* = 6.9 Hz, 6H).

**<sup>13</sup>C NMR** (100 MHz, CDCl<sub>3</sub>):  $\delta$  152.4, 140.8, 118.9, 114.6, 58.7, 55.7, 34.0, 31.7, 26.3, 21.7, 17.3.

**IR** (film, cm<sup>-1</sup>): 3417 (br), 2931, 2855, 2830, 1507, 1463, 1234, 1041, 815, 761.

**HRMS**: *m/z* calcd for C<sub>16</sub>H<sub>25</sub>NO [M+H]<sup>+</sup> 248.2009; found 248.2014.



### N-(1-isopropyl-4-phenylcyclohexyl)-4-methoxyaniline (19d)

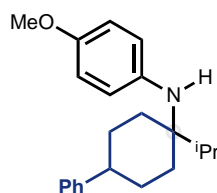

N-(1-isopropyl-4-phenylcyclohexyl)-4-methoxyaniline was prepared according to General Procedure **H** using Zn (79 mg, 1.2 mmol, 3 equiv), *p*-anisidine (49 mg, 0.4 mmol, 1 equiv), copper iodide (7.5 mg, 0.04 mmol, 10 mol%), 4-phenylcyclohexanone (105 mg, 0.6 mmol, 1.5 equiv) and 2-iodopropane (120  $\mu$ L, 1.2 mmol, 3 equiv) in 0.25 mL toluene. Crude material was purified by column chromatography (0-10% (10% Et<sub>2</sub>O: 90% Pet. Ether: 3% NEt<sub>3</sub>) in Pet. Ether) yielding the product as a brown oil (63 mg, 49%).

*NOTE: AY = 72%, 8.5:1 d.r. Major Isomer isolated.*

**<sup>1</sup>H NMR** (400 MHz, CDCl<sub>3</sub>):  $\delta$  7.34-7.30 (m, 2H), 7.29-7.25 (m, 2H), 7.24-7.19 (m, 2H), 6.81-6.74 (m, 4H), 3.79 (s, 3H), 3.20 (br s, 1H), 2.60-2.51 (m, 1H), 2.31-2.14 (m, 1H), 1.97-1.87 (m, 4H), 1.81-1.73 (m, 2H), 1.73-1.64 (m, 2H), 0.97 (d, *J* = 7.0 Hz, 6H).

**<sup>13</sup>C NMR** (125 MHz, CDCl<sub>3</sub>):  $\delta$  152.3, 146.4, 140.8, 128.3, 126.9, 126.0, 118.5, 114.6, 58.1, 55.7, 44.5, 34.1, 31.8, 29.2, 17.4.

**IR** (film, cm<sup>-1</sup>): 2941, 1506, 1235, 1038, 735, 698.

**HRMS**: *m/z* calcd for C<sub>22</sub>H<sub>29</sub>NO [M+H]<sup>+</sup> 324.2322; found 324.2323

### 4-isopropyl-N-(4-methoxyphenyl)tetrahydro-2H-pyran-4-amine (19e)

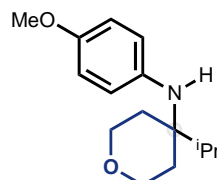

4-isopropyl-N-(4-methoxyphenyl)tetrahydro-2H-pyran-4-amine was prepared according to General Procedure **H** using Zn (79 mg, 1.2 mmol, 3 equiv), *p*-anisidine (49 mg, 0.4 mmol, 1 equiv), copper iodide (7.5 mg, 0.04 mmol, 10 mol%), 4-oxotetrahydropyran (55  $\mu$ L, 0.6 mmol, 1.5 equiv) and 2-iodopropane (120  $\mu$ L, 1.2 mmol, 3 equiv) in toluene (0.25 mL). Crude material was purified by column chromatography (30-50% dichloromethane in Pet. Ether (with 4% NEt<sub>3</sub>)) yielding the product as a brown oil (70 mg, 70%).

**<sup>1</sup>H NMR** (400 MHz, CDCl<sub>3</sub>):  $\delta$  6.76 - 6.72 (m, 2H), 6.71 - 6.65 (m, 2H), 3.85 - 3.75 (m, 4H), 3.74 (s, 3H), 3.31 - 2.95 (brs, 1H), 2.13 (sept, *J* = 6.9 Hz, 1H), 1.91 - 1.72 (m, 1H), 1.66 - 1.59 (m, 2H), 0.91 (d, *J* = 6.9 Hz, 6H).

**<sup>13</sup>C NMR** (100 MHz, CDCl<sub>3</sub>):  $\delta$  152.9, 140.0, 119.4, 114.6, 63.6, 56.7, 55.7, 33.7, 31.9, 17.0.

**IR** (film, cm<sup>-1</sup>): 3379 (br), 2954, 2865, 2832, 1506, 1234, 1102, 1037, 820, 764, 610.

**HRMS**: *m/z* calcd for C<sub>15</sub>H<sub>23</sub>NO<sub>2</sub> [M+H]<sup>+</sup> 250.1802; found 250.1806.

#### 4-isopropyl-N-(4-methoxyphenyl)tetrahydro-2H-thiopyran-4-amine (19f)

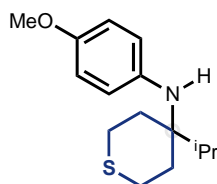

4-isopropyl-N-(4-methoxyphenyl)tetrahydro-2H-thiopyran-4-amine was prepared according to General Procedure **H** using Zn (79 mg, 1.2 mmol, 3 equiv), *p*-anisidine (49 mg, 0.4 mmol, 1 equiv), copper iodide (7.5 mg, 0.04 mmol, 10 mol%), tetrahydro-4*H*-thiopyran-4-one (70 mg, 0.6 mmol, 1.5 equiv) and 2-iodopropane (120  $\mu$ L, 1.2 mmol, 3 equiv) in dichloromethane (0.25 mL). Crude material was purified by column chromatography (3-9% dichloromethane in Pet. Ether (with 4% NEt<sub>3</sub>)) yielding the product as a brown oil (88 mg, 83%).

**<sup>1</sup>H NMR** (400 MHz, CDCl<sub>3</sub>):  $\delta$  6.74 (d, *J* = 8.6 Hz, 2H), 6.67 (d, *J* = 8.6 Hz, 2H), 3.74 (s, 3H), 3.15 - 2.93 (m, 3H), 2.44 - 2.36 (m, 2H), 2.10 - 1.97 (m, 3H), 1.95 - 1.84 (m, 2H), 0.89 (d, *J* = 6.9 Hz, 6H).

**<sup>13</sup>C NMR** (100 MHz, CDCl<sub>3</sub>):  $\delta$  153.0, 139.8, 119.4, 114.6, 57.5, 55.6, 34.0, 33.4, 23.7, 16.8.

**IR** (film, cm<sup>-1</sup>): 3357 (br), 2956, 2831, 1506, 1464, 1440, 1277, 1234, 1206, 1178, 1076, 909, 818, 791, 761, 730, 647.

**HRMS**: *m/z* calcd for C<sub>15</sub>H<sub>23</sub>NOS [M+H]<sup>+</sup> 266.1574; found 266.1578.

#### Benzyl 4-isopropyl-4-((4-methoxyphenyl)amino)piperidine-1-carboxylate (19g)

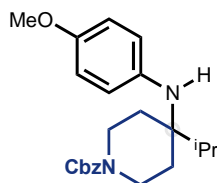

Benzyl 4-isopropyl-4-((4-methoxyphenyl)amino)piperidine-1-carboxylate was prepared according to General Procedure **H** using Zn (79 mg, 1.2 mmol, 3 equiv), 4-methoxyaniline hydrochloride (64 mg, 0.4 mmol, 1 equiv), copper iodide (7.6 mg, 0.04 mmol, 0.1 equiv), benzyl 4-oxopiperidine-1-carboxylate (140 mg, 0.6 mmol, 1.5 equiv) and 2-iodopropane (120  $\mu$ L, 1.2 mmol, 3 equiv) in dichloromethane (0.25 mL). Crude material was purified by column chromatography (0-5% MeOH in dichloromethane (with 5% Et<sub>3</sub>N)) yielding the product (72 mg, 47%) as a pale-yellow oil.

**<sup>1</sup>H NMR** (500 MHz, CDCl<sub>3</sub>):  $\delta$  7.39 - 7.34 (m, 4H), 7.34 - 7.30 (m, 1H), 6.77 - 6.72 (m, 2H), 6.72 - 6.65 (m, 2H), 5.14 (s, 2H), 4.06 - 3.91 (m, 2H), 3.74 (s, 3H), 3.31 - 3.21 (m, 2H), 3.09 (brs, 1H), 2.11 (sept, *J* = 6.9 Hz, 1H), 1.81 - 1.58 (m, 4H), 0.88 (d, *J* = 6.9 Hz, 6H).

**<sup>13</sup>C NMR** (126 MHz, CDCl<sub>3</sub>):  $\delta$  155.4, 153.0, 139.8, 137.0, 128.5, 127.9, 127.8, 119.5, 114.6, 67.0, 57.2, 55.6, 39.7, 33.3, 31.3, 17.0.

**IR** (film, cm<sup>-1</sup>): 3360, 2957, 2874, 1687, 1507, 1429, 1279, 1233, 1112, 1037, 821, 697.

**HRMS**: *m/z* calcd for C<sub>23</sub>H<sub>30</sub>N<sub>2</sub>NaO<sub>3</sub> [M+Na]<sup>+</sup> 405.2149; found 405.2145.

### Ethyl 3-isopropyl-3-((4-methoxyphenyl)amino)cyclobutane-1-carboxylate (19h)

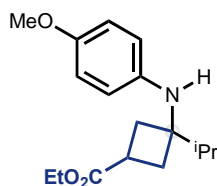

Ethyl 3-isopropyl-3-((4-methoxyphenyl)amino)cyclobutane-1-carboxylate was prepared according to General Procedure **H** using Zn (79 mg, 1.2 mmol, 3 equiv), *p*-anisidine (49 mg, 0.4 mmol, 1 equiv), copper iodide (7.5 mg, 0.04 mmol, 10 mol%), ethyl 3-oxocyclobutanecarboxylate (85 mg, 0.6 mmol, 1.5 equiv) and 2-iodopropane (120  $\mu$ L, 1.2 mmol, 3 equiv) in toluene (0.25 mL). Crude material was purified by column chromatography (15-30% dichloromethane in Pet. Ether (with 4%  $\text{NEt}_3$ )) yielding the product as a brown oil (93 mg, 80%, 1.1:1 d.r.).

**$^1\text{H}$  NMR** (400 MHz,  $\text{CDCl}_3$ ):  $\delta$  6.78 - 6.70 (m, 2H), 6.55 - 6.46 (m, 2H), 4.17 - 4.09 (m, 2H), 3.74 - 3.73 (m, 3H), 3.26 - 3.23 (brs, 1H), 3.18 (quint,  $J = 8.9$  Hz, 0.57 H), 2.87 (quint,  $J = 8.9$  Hz, 0.48 H), 2.54-2.43 (m, 2H), 2.41 - 2.32 (m, 1H), 2.30 - 2.15 (m, 2H), 1.27 - 1.21 (m, 3H), 0.95 (d,  $J = 6.8$  Hz, 2.9 H), 0.88 (d,  $J = 6.8$  Hz, 3.1 H).

**$^{13}\text{C}$  NMR** (100 MHz,  $\text{CDCl}_3$ ):  $\delta$  175.6, 175.3, 152.1, 139.8, 139.6, 116.3, 116.1, 114.8, 114.7, 60.6, 60.5, 60.0, 58.2, 55.83, 55.80, 33.4, 31.8, 31.7, 31.5, 40.0, 31.0, 17.2, 17.0, 14.33, 14.30.

**IR** (film,  $\text{cm}^{-1}$ ): 3396 (br), 2957, 2905, 2831, 1722, 1617, 1508, 1464, 1234, 1176, 1037, 819, 755.

**HRMS**:  $m/z$  calcd for  $\text{C}_{17}\text{H}_{25}\text{NO}_3$   $[\text{M}+\text{H}]^+$  292.1908; found 292.1914.

### 3-isopropyl-N-(4-methoxyphenyl)oxetan-3-amine (19i)

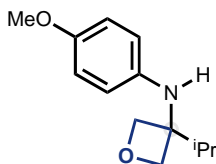

3-isopropyl-N-(4-methoxyphenyl)oxetan-3-amine was prepared according to General Procedure **J** using Zn (118 mg, 1.8 mmol, 3 equiv), *p*-anisidine (74 mg, 0.6 mmol, 1 equiv), copper iodide (57 mg, 0.3 mmol, 50 mol%), oxetan-3-one (88  $\mu$ L, 1.5 mmol, 2.5 equiv), 2-iodopropane (240  $\mu$ L, 2.4 mmol, 4.0 equiv) and TMSOTf (207  $\mu$ L, 1.2 mmol, 2.0 equiv). Crude material was purified by reverse phase column chromatography (0-95% MeCN in  $\text{H}_2\text{O}$ ). The product fractions were combined, the MeCN was removed in *vacuo* and extracted with dichloromethane (3 x 20 mL). The solvent was removed in *vacuo*, yielding the product as a yellow oil (84 mg, 63%).

Note: Not stable on silica

**$^1\text{H}$  NMR** (400 MHz,  $\text{CDCl}_3$ ):  $\delta$  6.80 - 6.75 (m, 2H), 6.52 - 6.47 (m, 2H), 4.75 (d,  $J = 6.5$  Hz, 2H), 4.65 (d,  $J = 6.3$  Hz, 2H), 3.75 (s, 3H), 3.66 (brs, 1H), 2.39 (sept,  $J = 6.9$  Hz, 1H), 1.03 (d,  $J = 6.9$  Hz, 6H).

**$^{13}\text{C}$  NMR** (100 MHz,  $\text{CDCl}_3$ ):  $\delta$  152.5, 138.9, 115.8, 114.8, 78.2, 61.6, 55.8, 30.7, 16.7.

**IR** (thin film,  $\text{cm}^{-1}$ ): 2954, 2875, 1741, 1604, 1520, 1425, 1300, 1204, 1116, 1033, 1000, 937, 825, 725, 634, 500.

**HRMS**:  $m/z$  calcd for  $\text{C}_{13}\text{H}_{19}\text{NO}_2$   $[\text{M}+\text{H}]^+$  222.1489, found 222.1489.

### Scaleup: Synthesis of 3-isopropyl-N-(4-methoxyphenyl)oxetan-3-amine on 2 mmol

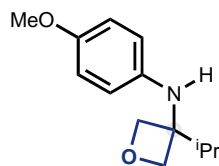

3-isopropyl-N-(4-methoxyphenyl)oxetan-3-amine was prepared according to General Procedure **J** using Zn (392 mg, 6.0 mmol, 3 equiv), *p*-anisidine (246 mg, 2.0 mmol, 1 equiv), copper iodide (191 mg, 1.0 mmol, 50 mol%), oxetan-3-one (290  $\mu$ L, 5.0 mmol, 2.5 equiv), 2-iodopropane (800  $\mu$ L, 8.0 mmol, 4.0 equiv) and TMSOTf (0.69 mL, 4.0 mmol, 2.0 equiv). Crude material was purified by column chromatography using alumina (0-10% EtOAc in Pet. Ether) yielding the product as a yellow oil (217 mg, 49%).

### N-(2,3-dimethylhexan-3-yl)-4-methoxyaniline (20a)

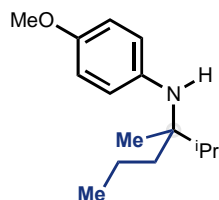

N-(2,3-dimethylhexan-3-yl)-4-methoxyaniline was prepared according to General Procedure **H** using Zn (79 mg, 1.2 mmol, 3 equiv), *p*-anisidine (49 mg, 0.4 mmol, 1 equiv), copper iodide (7.5 mg, 0.04 mmol, 10 mol%), 2-pentanone (64  $\mu$ L, 0.6 mmol, 1.5 equiv) and 2-iodopropane (120  $\mu$ L, 1.2 mmol, 3 equiv) in toluene (0.25 mL). Crude material was purified by column chromatography (5-10% dichloromethane in Pet. Ether (with 4% NEt<sub>3</sub>)) yielding the product as a brown oil (78 mg, 83%).

**<sup>1</sup>H NMR** (400 MHz, CDCl<sub>3</sub>):  $\delta$  6.76 - 6.71 (m, 2H), 6.70 - 6.66 (m, 2H), 3.75 (s, 3H), 3.08 (brs, 1H), 2.38 (sept,  $J$  = 6.8 Hz, 1H), 1.59 - 1.45 (m, 2H), 1.43 - 1.31 (m, 2H), 1.08 (s, 3H), 0.94 - 0.87 (m, 9H).

**<sup>13</sup>C NMR** (100 MHz, CDCl<sub>3</sub>):  $\delta$  152.8, 140.8, 119.5, 114.5, 59.1, 55.7, 40.1, 34.6, 22.1, 17.7, 17.3, 16.9, 14.8.

**IR** (film, cm<sup>-1</sup>): 3408 (br), 2956, 2871, 2831, 1507, 1464, 1234, 1179, 1040, 816, 732.

**HRMS**:  $m/z$  calcd for C<sub>15</sub>H<sub>25</sub>NO [M+H]<sup>+</sup> 236.2009; found 236.2015.

## N-(3,4-dimethyl-1-phenylpentan-3-yl)-4-methoxyaniline (20b)

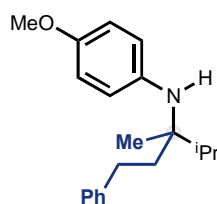

N-(3,4-dimethyl-1-phenylpentan-3-yl)-4-methoxyaniline was prepared according to General Procedure **h** using Zn (79 mg, 1.2 mmol, 3 equiv), *p*-anisidine (49 mg, 0.4 mmol, 1 equiv), copper iodide (7.5 mg, 0.04 mmol, 10 mol%), 4-phenyl-2-butanone (90  $\mu$ L, 0.6 mmol, 1.5 equiv) and 2-iodopropane (120  $\mu$ L, 1.2 mmol, 3 equiv) in toluene (0.25 ml). Crude material was purified by column chromatography (2-4% dichloromethane in Pet. Ether (with 4% NEt<sub>3</sub>)) yielding the product as a brown oil (71 mg, 60%).

<sup>1</sup>H NMR (700 MHz, CDCl<sub>3</sub>):  $\delta$  7.28 (t, *J* = 7.4 Hz, 2H), 7.19 (t, *J* = 7.3 Hz, 1H), 7.15 (d, *J* = 7.5 Hz, 2H), 6.81 - 6.74 (m, 4H), 3.78 (s, 3H), 3.35 - 3.16 (brs, 1H), 2.74 - 2.65 (m, 2H), 2.13 (sept, *J* = 6.8 Hz, 1H), 1.97-1.87 (m, 2H), 1.19 (s, 3H), 0.98 - 0.95 (m, 6H).

<sup>13</sup>C NMR (100 MHz, CDCl<sub>3</sub>):  $\delta$  152.9, 143.3, 140.6, 128.48, 128.47, 125.7, 119.1, 114.7, 59.1, 55.8, 40.2, 34.5, 30.3, 21.8, 17.7, 17.3.

IR (film, cm<sup>-1</sup>): 3406 (br), 3024, 2955, 2873, 1602, 1506, 1453, 1235, 1178, 1038, 817, 747, 698.

HRMS: *m/z* calcd for C<sub>20</sub>H<sub>27</sub>NO [M+H]<sup>+</sup> 298.2166; found 298.2169.

## Scaleup synthesis of N-(3,4-dimethyl-1-phenylpentan-3-yl)-4-methoxyaniline (20b) on 4 mmol

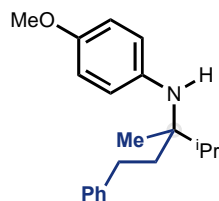

N-(3,4-dimethyl-1-phenylpentan-3-yl)-4-methoxyaniline was synthesised on a 4 mmol scale using *p*-anisidine (493 mg, 4 mmol, 1 equiv), zinc (785 mg, 12 mmol, 3 equiv) and copper iodide (75 mg, 0.4 mmol, 10 mol%) were added to a Biotage Microwave Process Vial (25 mL). The vial was sealed, put under vacuum, and refilled with N<sub>2</sub>. toluene (2.5 mL) was added. While stirring, 4-phenylbutan-2-one (0.90 mL, 6 mmol, 1.5 equiv) was added dropwise, followed by 2-iodopropane (1.2 mL, 12 mmol, 3 equiv). Then H<sub>2</sub>O (108  $\mu$ L, 6 mmol, 1.5 equiv) and TMSOTf (1.1 mL, 6 mmol, 1.5 equiv) were added dropwise at 0 °C. The mixture was allowed to warm to rt and stirred overnight. The mixture was worked up according to general procedure **H**. Crude material was purified by column chromatography (1-5% dichloromethane in Pet. Ether (with 4% NEt<sub>3</sub>)), which afforded a mixture of the desired product and unreacted 4-phenylbutan-2-one. The mixture was subjected to high vacuum under gentle heating to remove the ketone, affording the product as a brown oil (887 mg, 75%).

## Removal of PMP group

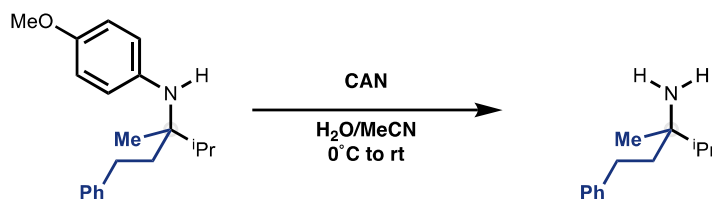

N-(3,4-dimethyl-1-phenylpentan-3-yl)-4-methoxyaniline (119 mg, 0.4 mmol, 1 equiv) was dissolved in MeCN (4 mL). CAN (542 mg, 1.08 mmol, 2.7 equiv) in H<sub>2</sub>O (2 mL) was added dropwise at 0 °C. The mixture was stirred at 0 °C for 4h and then at rt for 2 h. NaHCO<sub>3</sub> (saturated, aq), Na<sub>2</sub>SO<sub>3</sub> (saturated, aq), Rochelle salts (saturated, aq) and EtOAc were added. The aqueous and organic layers were separated. The aqueous layer was extracted with EtOAc three times. The combined organic layer was dried over Na<sub>2</sub>SO<sub>4</sub> and filtered. The solvent was removed under vacuum. <sup>1</sup>H NMR analysis of the crude product with 1,1,2,2-tetrachloroethane as an internal standard indicated that the product was formed in 89%. Column chromatography (2-8% NEt<sub>3</sub> in EtOAc) afforded 3,4-dimethyl-1-phenylpentan-3-amine as a colourless oil (45 mg, 64%).

<sup>1</sup>H NMR (400 MHz, CDCl<sub>3</sub>): δ 7.34 - 7.27 (m, 2H), 7.26 - 7.17 (m, 3H), 2.74 - 2.60 (m, 2H), 1.77 - 1.64 (m, 3H), 1.43 - 1.18 (brs, 2H), 1.09 (s, 3H), 0.98 - 0.92 (m, 6H).

<sup>13</sup>C NMR (100 MHz, CDCl<sub>3</sub>): δ 143.2, 128.5, 128.4, 125.8, 53.7, 43.1, 36.8, 30.3, 24.7, 17.5, 17.1.

IR (film, cm<sup>-1</sup>): 3367, 3303, 3062, 3026, 2960, 2873, 1601, 1496, 1454, 1372, 811, 750, 698.

HRMS: m/z calcd for C<sub>13</sub>H<sub>21</sub>N [M+H]<sup>+</sup> 192.1747; found 192.1751.

## N-(2,3-dimethylhept-6-en-3-yl)-4-methoxyaniline (20c)

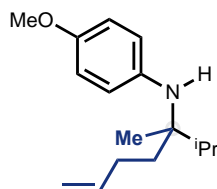

N-(2,3-dimethylhept-6-en-3-yl)-4-methoxyaniline was prepared according to General Procedure **H** using Zn (79 mg, 1.2 mmol, 3 equiv), *p*-anisidine (49 mg, 0.4 mmol, 1 equiv), copper iodide (7.5 mg, 0.04 mmol, 10 mol%), 5-hexen-2-one (70 μL, 0.6 mmol, 1.5 equiv) and 2-iodopropane (120 μL, 1.2 mmol, 3 equiv) in toluene (0.25 mL). Crude material was purified by column chromatography (4-5% dichloromethane in Pet. Ether (with 4% NEt<sub>3</sub>)) yielding the product as a brown oil (64 mg, 65%).

<sup>1</sup>H NMR (400 MHz, CDCl<sub>3</sub>): δ 6.74 (d, J = 8.3 Hz, 2H), 6.68 (d, J = 8.3 Hz, 2H), 5.90 - 5.76 (m, 1H), 5.00 (d, J = 17.1 Hz, 1H), 4.93 (d, J = 10.1 Hz, 1H), 3.75 (s, 3H), 3.33 - 2.86 (brs, 1H), 2.20 - 1.97 (m, 3H), 1.74 - 1.58 (m, 2H), 1.10 (s, 3H), 0.95 - 0.88 (m, 6H).

<sup>13</sup>C NMR (100 MHz, CDCl<sub>3</sub>): δ 152.9, 140.5, 139.5, 119.4, 114.6, 114.2, 59.0, 55.7, 36.9, 34.5, 28.2, 21.9, 17.7, 17.3.

IR (film, cm<sup>-1</sup>): 3403 (br), 3074, 2958, 2875, 2831, 1639, 1507, 1464, 1388, 1372, 1300, 1236, 1197, 1179, 1114, 1040, 995, 909, 818, 764.

HRMS: m/z calcd for C<sub>16</sub>H<sub>25</sub>NO [M+H]<sup>+</sup> 248.2009, found 248.2014.

### Ethyl 5-((4-methoxyphenyl)amino)-5,6-dimethylheptanoate (20d)

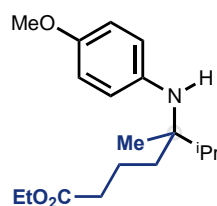

Ethyl 5-((4-methoxyphenyl)amino)-5,6-dimethylheptanoate was prepared according to General Procedure H using Zn (78.5 mg, 1.2 mmol, 3 equiv), *p*-anisidine (49 mg, 0.4 mmol, 1 equiv), copper iodide (7.5 mg, 0.04 mmol, 10 mol%), ethyl 4-acetylbutyrate (96  $\mu$ L, 0.6 mmol, 1.5 equiv) and 2-iodopropane (120  $\mu$ L, 1.2 mmol, 3 equiv) in toluene (0.25 mL). Crude material was purified by column chromatography (10-18% dichloromethane in Pet. Ether (with 4%  $\text{NEt}_3$ )) yielding the product as a brown oil (69 mg, 56%).

$^1\text{H NMR}$  (400 MHz,  $\text{CDCl}_3$ ):  $\delta$  6.72 (d,  $J = 8.8$  Hz, 2H), 6.66 (d,  $J = 8.6$  Hz, 2H), 4.10 (q,  $J = 7.1$  Hz, 2H), 3.73 (s, 3H), 3.27 - 3.01 (brs, 1H), 2.26 (t,  $J = 7.1$  Hz, 2H), 2.02 (sept,  $J = 6.8$  Hz, 1H), 1.75 - 1.50 (m, 4H), 1.23 (t,  $J = 7.1$ , 3H), 1.09 (s, 3H), 0.90 (d,  $J = 6.8$  Hz, 6H).

$^{13}\text{C NMR}$  (100 MHz,  $\text{CDCl}_3$ ):  $\delta$  173.8, 152.8, 140.5, 119.3, 114.5, 60.3, 58.9, 55.7, 37.0, 34.8, 34.5, 21.8, 19.3, 17.6, 17.2, 14.3.

IR (film,  $\text{cm}^{-1}$ ): 3403 (br), 2960, 2875, 2831, 1727, 1507, 1372, 1235, 1179, 1115, 1038, 909, 818, 730.

HRMS:  $m/z$  calcd for  $\text{C}_{18}\text{H}_{29}\text{NO}_3$   $[\text{M}+\text{H}]^+$  308.2221; found 308.2228.

### Synthesis of *N*-(4-methoxyphenyl)heptan-4-imine (Unoptimized)

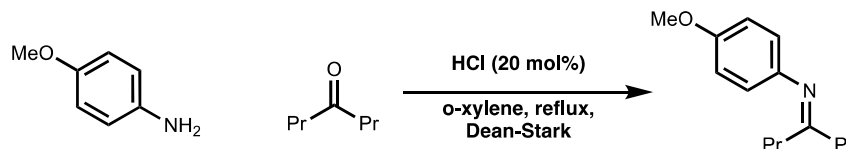

A mixture of *p*-anisidine (6.7 g, 54.7 mmol, 1 equiv), 4-heptanone (9.6 mL, 68.4 mmol, 1.25 equiv) and concentrated HCl (0.91 mL, 10.9 mmol, 20 mol%) in *o*-xylene (3 mL) was refluxed with the Dean-Stark apparatus overnight. The reaction was cooled to rt. The mixture was filtered through celite. Solvent was removed *in vacuo*. The crude mixture was purified by column chromatography (2%  $\text{Et}_2\text{O}$  in Pet. Ether (with 4%  $\text{Et}_3\text{N}$ )) to afford *N*-(4-methoxyphenyl)heptan-4-imine as a slightly yellow oil (2.8 g, 23%).

Notes: This imine hydrolyses easily under ambient conditions, should be stored under nitrogen and used within days after synthesis. A pure  $^{13}\text{C}$  NMR spectrum cannot be obtained as the imine hydrolyses during data acquisition.  $[\text{M}+\text{H}]^+$  peak cannot be observed in MS due to rapid hydrolysis of the imine.

$^1\text{H NMR}$  (400 MHz,  $\text{CDCl}_3$ ):  $\delta$  6.83 (d,  $J = 7.0$  Hz, 2H), 6.62 (d,  $J = 6.9$  Hz, 2H), 3.79 (s, 3H), 2.40 (d,  $J = 6.7$  Hz, 2H), 2.13 (t,  $J = 6.9$  Hz, 2H), 1.69 (sext,  $J = 7.2$  Hz, 2H), 1.48 (sext,  $J = 7.2$  Hz, 2H), 1.00 (t,  $J = 6.9$  Hz, 3H), 0.82 (t,  $J = 7.0$  Hz, 3H).

IR (film,  $\text{cm}^{-1}$ ): 2959, 2872, 2832, 1652, 1607, 1500, 1464, 1440, 1286, 1237, 1207, 1180, 1101, 1035, 836, 759.

### N-(4-isopropylheptan-4-yl)-4-methoxyaniline (20e)

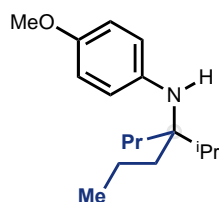

An oven dried vial (Biotage Microwave Process Vial (10 mL), equipped with gas-tight pierceable caps) was charged with a stirring bar, Zn dust (105 mg, 1.6 mmol, 4 equiv) and copper iodide (7.5 mg, 0.04 mmol, 10 mol%). The vial was sealed, evacuated and backfilled with N<sub>2</sub>. To this was added dry toluene (0.25 mL), followed by N-(4-methoxyphenyl)heptan-4-imine (88 mg, 0.4 mmol, 1 equiv), 2-iodopropane (160 μL, 1.6 mmol, 4 equiv), H<sub>2</sub>O (11 μL, 0.6 mmol, 1.5 equiv) and TMSOTf (109 μL, 0.6 mmol, 1.5 equiv) were subsequently added. The reaction mixture was stirred overnight. The mixture was worked up according to general procedure **H**. Crude material was purified by column chromatography (3-5% dichloromethane in Pet. Ether (with 4% NEt<sub>3</sub>)) to afford the product as a brown oil (60 mg, 57%).

<sup>1</sup>H NMR (400 MHz, CDCl<sub>3</sub>): δ 6.72 (d, J = 8.0 Hz, 2H), 6.64 (d, J = 8.1 Hz, 2H), 3.74 (s, 3H), 3.12 (brs, 1H), 1.99 (sept, J = 6.8 Hz, 1H), 1.59 - 1.50 (m, 4H), 1.42 - 1.29 (m, 4H), 0.96 - 0.84 (m, 12H).

<sup>13</sup>C NMR (100 MHz, CDCl<sub>3</sub>): δ 152.5, 141.3, 119.0, 114.5, 60.9, 55.7, 39.3, 35.1, 17.9, 17.7, 15.1.

IR (film, cm<sup>-1</sup>): 3403, 2956, 2871, 1507, 1464, 1234, 1178, 1041, 816.

HRMS: m/z calcd for C<sub>17</sub>H<sub>29</sub>NO [M+H]<sup>+</sup> 264.2322; found 264.2324.

### N-(2,3-dimethylpentan-2-yl)-4-methoxyaniline (21a)

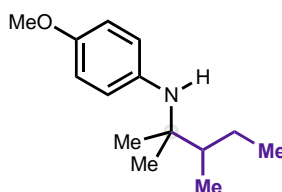

N-(2,3-dimethylpentan-2-yl)-4-methoxyaniline was prepared according to General Procedure **H** using Zn (79 mg, 1.2 mmol, 3 equiv), *p*-anisidine (49 mg, 0.4 mmol, 1 equiv), copper iodide (7.5 mg, 0.04 mmol, 10 mol%), acetone (44 μL, 0.6 mmol, 1.5 equiv) and 2-iodobutane (138 μL, 1.2 mmol, 3 equiv) in toluene (0.25 mL). Crude material was purified by column chromatography (4-10% dichloromethane in Pet. Ether (with 4% NEt<sub>3</sub>)) yielding the product as a brown oil (79 mg, 89%).

<sup>1</sup>H NMR (700 MHz, CDCl<sub>3</sub>): δ 6.76 - 6.74 (m, 4H), 3.75 (s, 3H), 3.15 - 2.78 (brs, 1H), 1.78 - 1.71 (m, 1H), 1.59 - 1.53 (m, 1H), 1.17 - 1.13 (m, 6H), 1.04 - 0.96 (m, 1H), 0.94 - 0.90 (m, 6H).

<sup>13</sup>C NMR (100 MHz, CDCl<sub>3</sub>): δ 153.7, 140.3, 121.5, 114.3, 57.5, 55.7, 43.6, 25.7, 25.2, 24.3, 13.8, 13.1.

IR (film, cm<sup>-1</sup>): 3402 (br), 2962, 2932, 2874, 1506, 1463, 1235, 1178, 1039, 818.

HRMS: m/z calcd for C<sub>14</sub>H<sub>23</sub>NO [M+H]<sup>+</sup> 222.1853; found 222.1856.



### N-(2-cyclopentylpropan-2-yl)-4-methoxyaniline (21b)

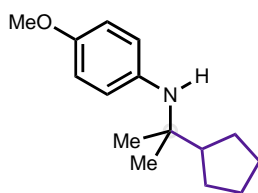

N-(2-cyclopentylpropan-2-yl)-4-methoxyaniline was prepared according to General Procedure **H** using Zn (79 mg, 1.2 mmol, 3 equiv), *p*-anisidine (49 mg, 0.4 mmol, 1 equiv), copper iodide (7.5 mg, 0.04 mmol, 10 mol%), acetone (44  $\mu$ L, 0.6 mmol, 1.5 equiv) and cyclopentyl iodide (139  $\mu$ L, 1.2 mmol, 3 equiv) in toluene (0.25 mL). Crude material was purified by column chromatography (5-10% dichloromethane in Pet. Ether (with 4% NEt<sub>3</sub>)) yielding the product as a brown oil (81 mg, 87%)

**<sup>1</sup>H NMR** (700 MHz, CDCl<sub>3</sub>):  $\delta$  6.80 (d, *J* = 8.8 Hz, 2H), 6.75 (d, *J* = 8.9 Hz, 2H), 3.75 (s, 3H), 3.05 - 2.89 (brs, 1H), 2.09 (quint, *J* = 8.8 Hz, 1H), 1.71 - 1.65 (m, 2H), 1.64 - 1.58 (m, 2H), 1.58 - 1.50 (m, 2H), 1.42-1.35 (m, 2H), 1.16 (s, 6H).

**<sup>13</sup>C NMR** (175 MHz, CDCl<sub>3</sub>):  $\delta$  154.2, 140.0, 122.7, 114.2, 56.8, 55.6, 50.1, 27.6, 26.2, 25.8.

**IR** (film, cm<sup>-1</sup>): 3370 (br), 2949, 2866, 1500, 1463, 1236, 1178, 1038, 818.

**HRMS**: *m/z* calcd for C<sub>15</sub>H<sub>23</sub>NO [M+H]<sup>+</sup> 234.1853; found 234.1858.

### N-(2-(2,3-dihydro-1H-inden-2-yl)propan-2-yl)-4-methoxyaniline (21c)

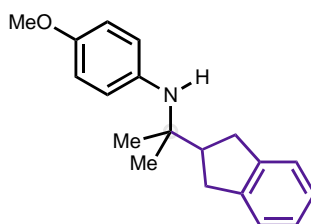

N-(2-(2,3-dihydro-1H-inden-2-yl)propan-2-yl)-4-methoxyaniline was prepared according to General Procedure **H** using Zn (79 mg, 1.2 mmol, 3 equiv), *p*-anisidine (49 mg, 0.4 mmol, 1 equiv), copper iodide (7.5 mg, 0.04 mmol, 10 mol%), acetone (44  $\mu$ L, 0.6 mmol, 1.5 equiv) and 2-iodo-2,3-dihydro-1H-indene<sup>13</sup> (293 mg, 1.2 mmol, 3 equiv) in toluene (0.25 mL). Crude material was purified by column chromatography (1-4% dichloromethane in Pet. Ether (with 4% NEt<sub>3</sub>)) yielding the product as a brown oil (72 mg, 64%).

**<sup>1</sup>H NMR** (400 MHz, CDCl<sub>3</sub>):  $\delta$  7.23 - 7.18 (m, 2H), 7.18 - 7.13 (m, 2H), 6.90 - 6.83 (m, 2H), 6.81 - 6.75 (m, 2H), 3.77 (s, 3H), 3.03 - 2.89 (m, 4H), 2.80 (quint, *J* = 8.9 Hz, 1H), 1.26 (s, 6H).

**<sup>13</sup>C NMR** (100 MHz, CDCl<sub>3</sub>):  $\delta$  154.5, 143.1, 139.4, 126.4, 124.6, 122.9, 114.3, 56.8, 55.7, 50.0, 34.5, 25.9.

**IR** (film, cm<sup>-1</sup>): 3370 (br), 3067, 3021, 2933, 2906, 1507, 1484, 1460, 1238, 1223, 1179, 1038, 822, 743.

**HRMS**: *m/z* calcd for C<sub>19</sub>H<sub>23</sub>NO [M+H]<sup>+</sup> 282.1853, found 282.1855.

#### 4-methoxy-N-(2-methylpentan-2-yl)aniline (21d)

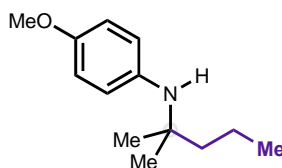

4-methoxy-N-(2-methylpentan-2-yl)aniline was prepared according to General Procedure **H** with modifications using Zn (209 mg, 3.2 mmol, 8 equiv), *p*-anisidine (49 mg, 0.4 mmol, 1 equiv), copper iodide (7.5 mg, 0.04 mmol, 10 mol%), acetone (44  $\mu$ L, 0.6 mmol, 1.5 equiv) and propyl iodide (195  $\mu$ L, 2.0 mmol, 5 equiv) in toluene (0.25 mL). The reaction time was 72 h. Crude material was purified by column chromatography (3-8% dichloromethane in Pet. Ether (with 4% NEt<sub>3</sub>)) yielding the product as a brown oil (57 mg, 69%).

**<sup>1</sup>H NMR** (400 MHz, CDCl<sub>3</sub>):  $\delta$  6.80 - 6.73 (m, 4H), 3.76 (s, 3H), 2.98 (brs, 1H), 1.52 - 1.45 (m, 2H), 1.44 - 1.32 (m, 2H), 1.19 (s, 6H), 0.91 (t,  $J = 7.1$  Hz, 3H).

**<sup>13</sup>C NMR** (100 MHz, CDCl<sub>3</sub>):  $\delta$  154.1, 139.7, 122.2, 114.3, 55.6, 54.8, 44.6, 28.2, 17.6, 14.8.

**IR** (film, cm<sup>-1</sup>): 3370 (br), 2956, 2870, 1506, 1234, 1178, 1038, 821, 770.

**HRMS**:  $m/z$  calcd for C<sub>13</sub>H<sub>21</sub>NO [M+H]<sup>+</sup> 208.1696, found 208.1697.

## 10. Mechanistic investigations and control experiments

### 10.1 Formation of alkyl-zinc reagents

#### 10.1.1 General procedure K for alkyl-zinc formation<sup>14,15</sup>

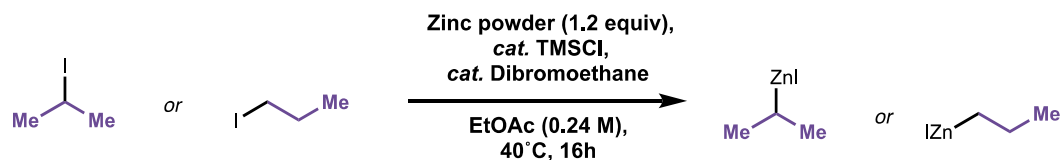

Zinc dust (780 mg, 12 mmol, 1.2 equiv) was added to a dry round bottom flask. Degassed solvent (2.5 mL) was added. 1,2-dibromoethane (43  $\mu$ L) was added. The mixture was stirred at 65 °C for 3 mins. The mixture was cooled to rt. TMSCl (63  $\mu$ L) was added. The mixture was stirred at rt for 15 mins. Propyl iodide (975  $\mu$ L, 10 mmol, 1 equiv) or 2-iodopropane (1 mL, 10 mmol, 1 equiv) was dissolved in solvent (2.5 mL) in another dry round bottom flask. The alkyl iodide solution was added dropwise. Solvent (2.5 mL) was used to rinse the round bottom flask which the alkyl iodide was first dissolved in and was transferred to the round bottom flask containing zinc. The mixture was stirred at 40 °C overnight. The mixture was cooled to r.t. and the stirring was stopped to let the remaining zinc settle. The supernatant solution was transferred to a dry round bottom flask. The concentration of alkylzinc iodide was determined by titration against  $I_2$  before use.<sup>16</sup>

#### 10.1.2 General procedure J for alkyl zinc formation<sup>14,15</sup>

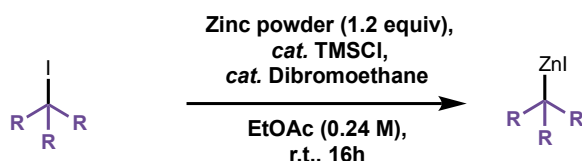

Zinc dust (780 mg, 12 mmol, 1.2 equiv) was added to a dry round bottom flask. Degassed solvent (2.5 mL) was added. 1,2-dibromoethane (43  $\mu$ L) was added. The mixture was stirred at 65 °C for 3 mins. The mixture was cooled to rt. TMSCl (63  $\mu$ L) was added. The mixture was stirred at rt for 15 mins. Propyl iodide (975  $\mu$ L, 10 mmol, 1 equiv), 2-iodopropane (1 mL, 10 mmol, 1 equiv) or tert-butyl iodide (1.2 mL, 10 mmol, 1 equiv) was dissolved in solvent (2.5 mL) in another dry round bottom flask. The alkyl iodide solution was added dropwise. Solvent (2.5 mL) was used to rinse the round bottom flask which the alkyl iodide was first dissolved in and was transferred to the round bottom flask containing zinc. The mixture was stirred at r.t. overnight. The stirring was stopped to let the remaining zinc settle. The concentration of alkylzinc iodide was determined by titration against  $I_2$  before use.<sup>16</sup>

### 10.1.3 General procedure L for alkyl zinc formation<sup>14,15</sup>

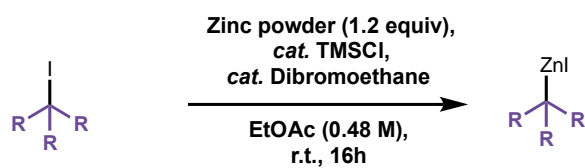

Zinc dust (780 mg, 12 mmol, 1.2 equiv) was added to a dry round bottom flask. Toluene (2.5 mL) was added. 1,2-dibromoethane (43  $\mu$ L) was added. The mixture was stirred at 65  $^{\circ}$ C for 3 mins. The mixture was cooled to rt. TMSCl (63  $\mu$ L) was added. The mixture was stirred at r.t. for 15 mins. 2-iodopropane (1 mL, 10 mmol, 1 equiv) was added dropwise. The mixture was stirred at rt overnight. The stirring was stopped to let the remaining zinc settle. The concentration of alkylzinc iodide was determined by titration against  $I_2$  before use.<sup>16</sup>

## 10.2 Reactivity of alkyl-zinc reagents

### 10.2.1 Primary alkyl-zinc reactivity

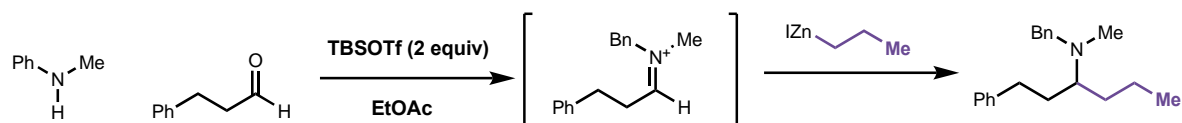

A Biotage Microwave Process microwave vial (10 mL) was sealed, put under vacuum, and refilled with N-methylbenzylamine (26 mL, 0.2 mmol, 1 equiv) was dissolved in EtOAc (1 mL). Hydrocinnamaldehyde (53 mL, 0.4 mmol, 2 equiv) was added, followed by TBSOTf (92 mL, 0.4 mmol, 2 equiv). The mixture was allowed to stir for 15 mins. A *n*-propyl zinc iodide solution, prepared according to General Procedure J (1.4 M, 429  $\mu$ L, 0.6 mmol, 3 equiv) in EtOAc was added. The mixture was stirred overnight. The mixture was diluted with dichloromethane. NaOH (10%, aq) solution was added. The heterogeneous mixture was stirred for 15 mins vigorously. The organic and aqueous layers were separated. The aqueous layer was extracted with dichloromethane three times. The combined organic layer was dried over Na<sub>2</sub>SO<sub>4</sub> and filtered. The solvent was removed *in vacuo*. The expected product was formed in approximately 20% from <sup>1</sup>H NMR spectroscopic analysis of the crude mixture. The second step was repeated using a propyl zinc solution prepared in the presence of 40 mol% copper iodide (1.1 M, 544  $\mu$ L, 0.6 mmol, 3 equiv). The expected product was formed in 20% from <sup>1</sup>H NMR spectroscopic analysis of the crude mixture.

### 10.2.2 Secondary alkyl-zinc reactivity

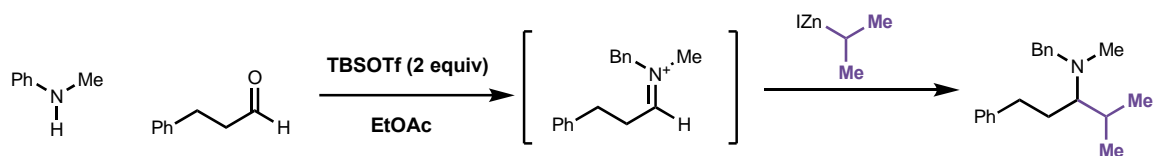

A Biotage Microwave Process microwave vial (10 mL) was sealed, put under vacuum and refilled with N<sub>2</sub>. N-methylbenzylamine (26 mL, 0.2 mmol, 1 equiv) was dissolved in EtOAc (1 mL). Hydrocinnamaldehyde (53 mL, 0.4 mmol, 2 equiv) was added, followed by TBSOTf (92  $\mu$ L, 0.4 mmol, 2 equiv). The mixture was allowed to stir for 15 mins. The isopropylzinc iodide solution, prepared according to General Procedure K, (1 M, 0.60 mL, 0.6 mmol, 3 equiv) in EtOAc was added. The mixture was stirred overnight. The mixture was diluted with dichloromethane. NaOH (10%, aq) solution was added. The heterogeneous mixture was stirred for 15 mins vigorously. The organic and aqueous layer were separated. The aqueous layer was extracted with dichloromethane three times. The combined organic layer was dried over Na<sub>2</sub>SO<sub>4</sub> and filtered. The expected product was formed in 79% from <sup>1</sup>H NMR spectroscopic analysis of the crude mixture.

### 10.2.3 Tertiary alkyl-zinc reactivity

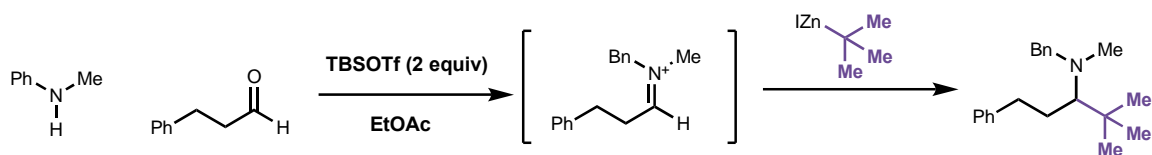

A Biotage Microwave Process microwave vial (10 mL) was sealed, put under vacuum and refilled with N<sub>2</sub>. N-methylbenzylamine (26  $\mu$ L, 0.2 mmol, 1 equiv) was dissolved in EtOAc (1 mL). hydrocinnamaldehyde (53  $\mu$ L, 0.4 mmol, 2 equiv) was added, followed by TBSOTf (92  $\mu$ L, 0.4 mmol, 2 equiv). The mixture was allowed to stir for 15 mins. The tertbutylzinc iodide solution, prepared according to General Procedure J, (1.1 M, 0.55 mL, 0.6 mmol, 3 equiv) in EtOAc was added. The mixture was stirred overnight. The mixture was diluted with dichloromethane. NaOH (10%, aq) solution was added. The heterogeneous mixture was stirred for 15 mins vigorously. The organic and aqueous layer were separated. The aqueous layer was extracted with dichloromethane three times. The combined organic layer was dried over Na<sub>2</sub>SO<sub>4</sub> and filtered. The expected product was formed in 91% from <sup>1</sup>H NMR spectroscopic analysis of the crude mixture.

Several follow up experiments with modifications are shown in the summary table below:

| Experiment | Modification                                                                               | Yield /% |
|------------|--------------------------------------------------------------------------------------------|----------|
| A          | None                                                                                       | 91       |
| B          | No TBSOTf added                                                                            | 82       |
| C          | copper iodide (30 mg, 0.16 mmol, 0.4 equiv) added to amine mixture                         | 100      |
| D          | copper iodide (30 mg, 0.16 mmol, 0.4 equiv) added to amine mixture and no TBSOTf was added | 61       |

### 10.2.4 Attempted preparation of alkylzinc from redox active ester

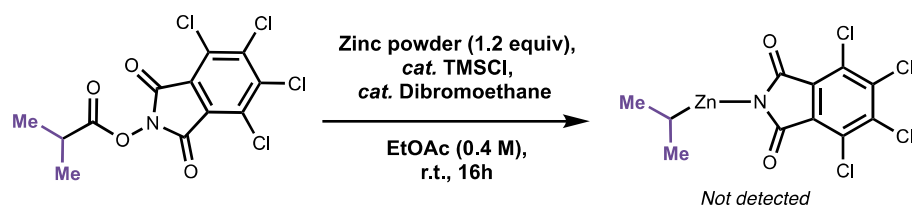

Zinc (26 mg, 0.4 mmol, 1 equiv) was added to a dry round bottom flask. EtOAc (1 mL) was added. 1 drop of dibromoethane was added. The mixture was stirred at 65 °C for 3 min. After cooling to rt, TMSCl (1 drop) was added. The mixture was stirred at r.t. for 15 mins. 4,5,6,7-tetrachloro-1,3-dioxoisindolin-2-yl isobutyrate (148 mg, 0.4 mmol, 1 equiv) was added. The mixture was stirred at rt overnight. Stirring was stopped to let remaining zinc settle. The supernatant solution was transferred to a dry round bottom flask. I<sub>2</sub> was not discoloured upon addition of this solution, indicating that no alkylzinc was formed. To mimic the conditions of the zinc-mediated CAA, the experiment was repeated with the addition of TMSOTf (217 μL, 0.4 mmol, 1 equiv) and the use of excess zinc (39 mg, 0.6 mmol, 1 equiv). The resulting solution also did not discolorise I<sub>2</sub>. Despite this result, this solution was added to the iminium formed from N-methylbenzylamine and hydrocinnamaldehyde as previously described. No CAA product was not detected with <sup>1</sup>H NMR spectroscopy after workup.

### 10.2.5 Reactivity of secondary alkyl-zinc with ketimines

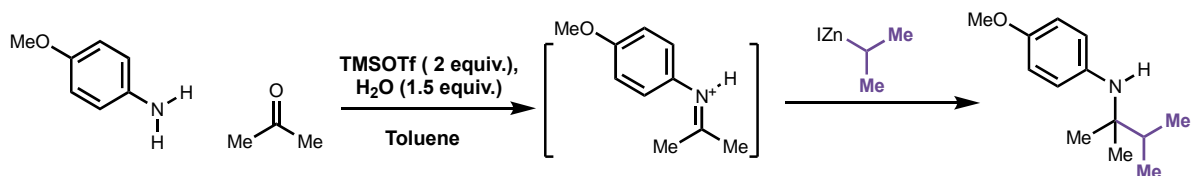

A Biotage Microwave Process microwave vial (10 mL) was sealed, put under vacuum and refilled with N<sub>2</sub>. In the vial, p-anisidine (49 mg, 0.4 mmol, 1 equiv) was dissolved in toluene (0.1 mL). Acetone (35 μL, 0.6 mmol, 1.5 equiv) was added, followed by H<sub>2</sub>O (11 μL, 0.04 mmol, 1.5 equiv), TMSOTf (109 μL, 0.6 mmol, 1.5 equiv). The mixture was allowed to stir for 15 mins. The isopropylzinc iodide solution, prepared according to General Procedure L, (2.4 M, 0.50 mL, 1.2 mmol, 3 equiv) in toluene was added. The mixture was stirred overnight. The mixture was diluted with dichloromethane. NaOH (10%, aq) solution was added. The heterogeneous mixture was stirred for 15 mins vigorously. The organic and aqueous layer were separated. The aqueous layer was extracted with dichloromethane three times. The combined organic layer was dried over Na<sub>2</sub>SO<sub>4</sub> and filtered. The expected product was observed formed from <sup>1</sup>H NMR spectroscopic analysis of the crude mixture.

ii) The processed was repeated with N-Cbz piperidone (140 mg, 0.6 mmol, 1.5 equiv) as the ketone. The expected product was not observed from <sup>1</sup>H NMR spectroscopic analysis of the crude mixture.

### 10.3 Formation of Alkyl-zincs under standard reaction conditions

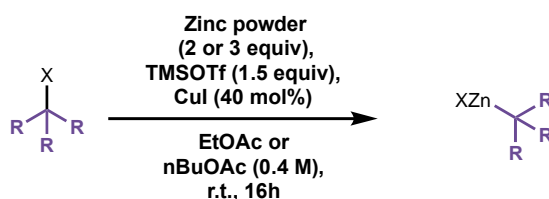

Reactions were conducted according to the corresponding general procedure with the amine and aldehyde removed (with modifications as stated). After the reaction time was completed, the stirring was stopped, and supernatant was used to determine the concentration of organometallic iodometric titration.

| Reaction                               | Iodide or Bromide  | General Procedure | Alkyl substituent | copper iodide added | Volume required to quench iodine (iodine scale specified) | Concentration / M |
|----------------------------------------|--------------------|-------------------|-------------------|---------------------|-----------------------------------------------------------|-------------------|
| A                                      | Iodide             | E                 | primary           | No                  | 1.2 mL for 0.2 mmol                                       | 0.167             |
| B                                      | Iodide             | E                 | primary           | Yes                 | 1.0 mL for 0.2 mmol                                       | 0.2               |
| C                                      | Iodide             | B                 | secondary         | No                  | 0.95 mL for 0.2 mmol                                      | 0.21              |
| D                                      | Iodide*            | E                 | tertiary          | No                  | Full volume did not quench solution (0.2 mmol)            | -                 |
| E                                      | Iodide*            | E                 | tertiary          | Yes                 | Full volume did not quench solution (0.2 mmol)            | -                 |
| F                                      | Iodide             | E                 | tertiary          | No                  | Full volume did not quench solution (0.1 mmol)            | -                 |
| G                                      | Iodide             | E                 | tertiary          | Yes                 | Full volume did not quench solution (0.1 mmol)            | -                 |
| H                                      | Bromide            | E                 | tertiary          | Yes                 | Full volume did not quench solution (0.1 mmol)            | -                 |
| I                                      | Redox active ester | G                 | secondary         | No                  | Full volume did not quench solution (0.05 mmol)           | -                 |
| *-TMSOTF (1.5 equiv) added to mixture. |                    |                   |                   |                     |                                                           |                   |



## 10.4 Radical trapping experiments

### 10.4.1 Radical trapping experiments summary

TEMPO, styrene and 1,1-diphenylethylene were used as radical traps. It is important to note:

1. TEMPO is known to react with organozincs to produce the same product as the radical adduct.<sup>17,18,19</sup> Furthermore, it is known to complex alkyl zincs into conglomerate species.<sup>20</sup>
2. Styrene and 1,1-diphenylethylene do not suffer from reactivity with alkyl zinc species unlike many common radical traps (e.g. giiese acceptors). However, they show considerably slower reactivity rates with alkyl radicals (in particular primary radicals) which means their reaction rates maybe slower than addition to the iminium.<sup>21,22,23,24</sup>

**Table summarising all trapping experiments conducted.**

| <b>Exp</b> | <b>Iminium type</b> | <b>Feedstock source</b> | <b>Alkyl substitution</b> | <b>Trapping Reagent</b> | <b>Yield /%</b> |
|------------|---------------------|-------------------------|---------------------------|-------------------------|-----------------|
| <b>A</b>   | Iminium             | Iodide                  | Primary                   | TEMPO                   | Trace           |
| <b>B</b>   | Iminium             | Iodide                  | Primary                   | styrene                 | 100             |
| <b>C</b>   | Iminium             | Iodide                  | Primary                   | 1,1-diphenylethylene    | 100             |
| <b>D</b>   | Iminium             | Iodide                  | Secondary                 | TEMPO                   | Trace           |
| <b>E</b>   | Iminium             | Iodide                  | Secondary                 | styrene                 | 100             |
| <b>F</b>   | Iminium             | Iodide                  | Secondary                 | 1,1-diphenylethylene    | 40              |
| <b>G</b>   | Iminium             | Iodide                  | Tertiary                  | TEMPO                   | Trace           |
| <b>H</b>   | Iminium             | Iodide                  | Tertiary                  | styrene                 | 36              |
| <b>I</b>   | Iminium             | Iodide                  | Tertiary                  | 1,1-diphenylethylene    | 45              |
| <b>J</b>   | Iminium             | RAE                     | Secondary                 | TEMPO                   | 0               |
| <b>K</b>   | Iminium             | RAE                     | Secondary                 | styrene                 | 0               |
| <b>L</b>   | Iminium             | RAE                     | Secondary                 | 1,1-diphenylethylene    | 0               |
| <b>M</b>   | Ketiminium          | Iodide                  | Secondary                 | TEMPO                   | Trace           |
| <b>N</b>   | Ketiminium          | Iodide                  | Secondary                 | styrene                 | 74              |
| <b>O</b>   | Ketiminium          | Iodide                  | Secondary                 | 1,1-diphenylethylene    | 46              |

## 10.4.2 Radical trapping experiments procedures

### 1° TEMPO

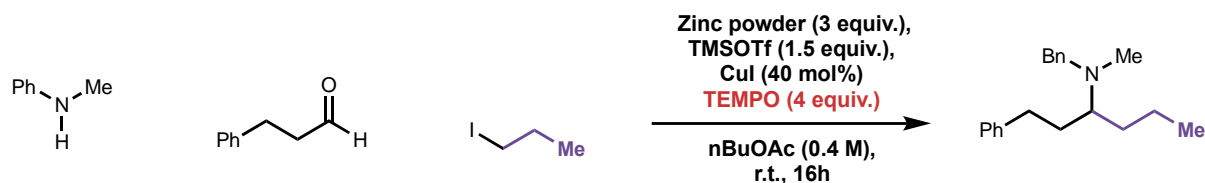

An oven dried vial (Biotage Microwave Process Vial (10 mL), equipped with gas-tight pierceable caps) was charged with a stirring bar, Zn dust (78 mg, 1.2 mmol, 3 equiv), copper iodide (30 mg, 0.16 mmol, 40 mol%) and TEMPO (250 mg, 1.6 mmol, 4 equiv). The vial was sealed, evacuated and backfilled with N<sub>2</sub>. To this was added *n*BuOAc (1 mL), followed by the N-methylbenzylamine (52 μL, 0.4 mmol, 1.0 equiv) and hydrocinnamaldehyde (108 μL, 0.8 mmol, 2 equiv). The mixture was stirred for 15 minutes then, whilst stirring, 1-iodopropane (156 μL, 1.6 mmol, 4 equiv), and TMSOTf (106 μL, 0.6 mmol, 1.5 equiv) were added. The reaction mixture was stirred overnight. The crude mixture was transferred into a 50 ml round bottom flask and diluted with dichloromethane (approximately 20 mL). NaOH (approximately 15 ml, 10% aq.) was added. The heterogenous mixture was vigorously stirred for 10-15 min. The aqueous layer was extracted with dichloromethane three times. The combined organic phases were washed with sat. Na<sub>2</sub>S<sub>2</sub>O<sub>3</sub> with 5 drops of 3 M HCl until the solution transformed from orange/red to yellow/colourless. The combined organic layer was dried over anhydrous MgSO<sub>4</sub>. The solvent was removed *in vacuo* and the reaction was analysed by LCMS and <sup>1</sup>H NMR. Trace product was detected by LCMS and <sup>1</sup>H NMR. A significant amount of the propyl TEMPO adduct was detected by LCMS.

### 1° Styrene

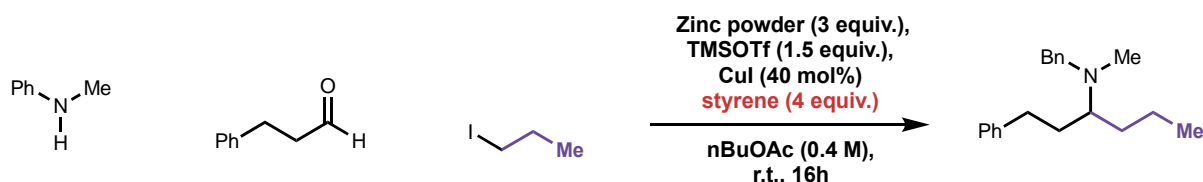

An oven dried vial (Biotage Microwave Process Vial (10 mL), equipped with gas-tight pierceable caps) was charged with a stirring bar, Zn (78 mg, 1.2 mmol, 3 equiv) and copper iodide (30 mg, 0.16 mmol, 40 mol%). The vial was sealed, evacuated and backfilled with N<sub>2</sub>. To this was added *n*BuOAc (1 mL), followed by the N-methylbenzylamine (52 μL, 0.4 mmol, 1.0 equiv), hydrocinnamaldehyde (108 μL, 0.8 mmol, 2 equiv) and styrene (183 μL, 1.6 mmol, 4 equiv). The mixture was stirred for 15 minutes then, whilst stirring, 1-iodopropane (156 μL, 1.6 mmol, 4 equiv), and TMSOTf (106 μL, 0.6 mmol, 1.5 equiv) were added. The reaction mixture was stirred overnight. The crude mixture was transferred into a 50 ml round bottom flask and diluted with dichloromethane (approximately 20 ml). NaOH (approximately 15 ml, 10% aq.) was added. The heterogenous mixture was vigorously stirred for 10-15 min. The aqueous layer was extracted with dichloromethane three times. The combined organic layer was dried over anhydrous MgSO<sub>4</sub>. The solvent was removed *in vacuo* and the reaction was analysed by <sup>1</sup>H NMR using 1,1,2,2-tetrachloroethane as an internal standard displaying a quantitative crude yield.

## 1° 1,1-diphenylethylene

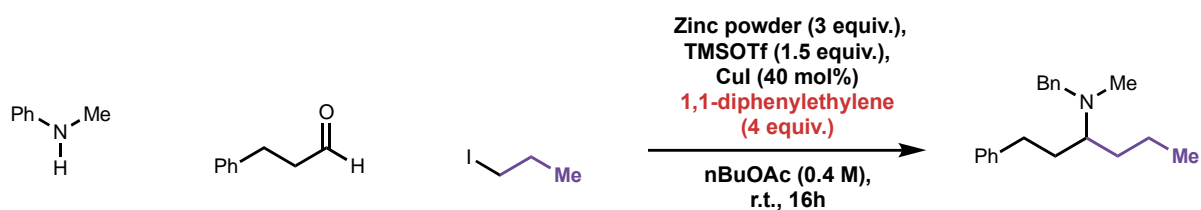

An oven dried vial (Biotage Microwave Process Vial (10 mL), equipped with gas-tight pierceable caps) was charged with a stirring bar, Zn (78 mg, 1.2 mmol, 3 equiv) and copper iodide (30 mg, 0.16 mmol, 40 mol%). The vial was sealed, evacuated and backfilled with N<sub>2</sub>. To this was added *n*BuOAc (1 mL), followed by the N-methylbenzylamine (52 μL, 0.4 mmol, 1.0 equiv), hydrocinnamaldehyde (108 μL, 0.8 mmol, 2 equiv) and 1,1-diphenylethylene (283 μL, 1.6 mmol, 4 equiv). The mixture was stirred for 15 minutes then, whilst stirring, 1-iodopropane (156 μL, 1.6 mmol, 4 equiv), and TMSOTf (106 μL, 0.6 mmol, 1.5 equiv) were added. The reaction mixture was stirred overnight. The crude mixture was transferred into a 50 ml round bottom flask and diluted with dichloromethane (approximately 20 ml). NaOH (approximately 15 ml, 10% aq.) was added. The heterogenous mixture was vigorously stirred for 10-15 min. The aqueous layer was extracted with dichloromethane three times. The combined organic layer was dried over anhydrous MgSO<sub>4</sub>. The solvent was removed *in vacuo* and the reaction was analysed by <sup>1</sup>H NMR using 1,1,2,2-tetrachloroethane as an internal standard displaying a quantitative crude yield.

## 2° TEMPO

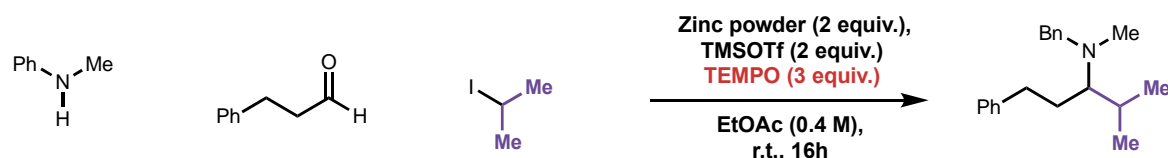

An oven dried vial (Biotage Microwave Process Vial (10 mL), equipped with gas-tight pierceable caps) was charged with a stirring bar and Zn (52 mg, 0.8 mmol, 2 equiv) and TEMPO (188 mg, 1.2 mmol, 3 equiv). The vial was sealed, evacuated and backfilled with N<sub>2</sub>. To this was added EtOAc (1 mL), followed by the N-methylbenzylamine (52 μL, 0.4 mmol, 1.0 equiv), hydrocinnamaldehyde (108 μL, 0.8 mmol, 2 equiv) and 2-iodopropane (120 μL, 1.2 mmol, 3 equiv). The reaction mixture was stirred for one minute, followed by the addition of TMSOTf (145 μL, 0.4 mmol, 2.0 equiv). The reaction mixture was stirred overnight. The crude mixture was transferred into a 50 ml round bottom flask and diluted with dichloromethane (approximately 20 ml). NaOH (approximately 15 ml, 10% aq.) was added. The heterogenous mixture was vigorously stirred for 10-15 min. The aqueous layer was extracted with dichloromethane three times. The combined organic phases were washed with sat. Na<sub>2</sub>S<sub>2</sub>O<sub>3</sub> with 5 drops of 3 M HCl until the solution transformed from orange/red to yellow/colourless. The combined organic layer was dried over anhydrous MgSO<sub>4</sub>. The solvent was removed *in vacuo* and the reaction was analysed by LCMS and <sup>1</sup>H NMR. Trace product was detected by LCMS and <sup>1</sup>H NMR. A significant amount of the isopropyl TEMPO adduct was detected by LCMS.

## 2° Styrene

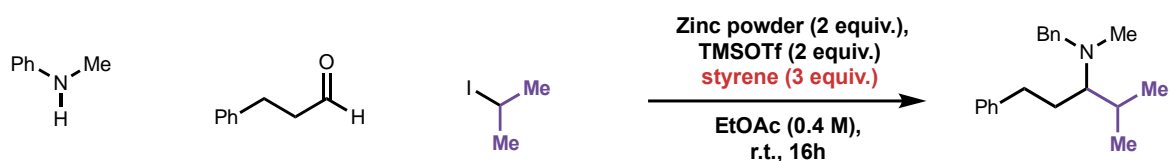

An oven dried vial (Biotage Microwave Process Vial (10 mL), equipped with gas-tight pierceable caps) was charged with a stirring bar and Zn dust (52 mg, 0.8 mmol, 2 equiv) and TEMPO (188 mg, 1.2 mmol, 3 equiv). The vial was sealed, evacuated and backfilled with N<sub>2</sub>. To this was added EtOAc (1 mL), followed by the N-methylbenzylamine (52 μL, 0.4 mmol, 1.0 equiv), hydrocinnamaldehyde (108 μL, 0.8 mmol, 2 equiv), styrene (137 μL, 1.2 mmol, 3 equiv) and 2-iodopropane (120 μL, 1.2 mmol, 3 equiv). The reaction mixture was stirred for one minute, followed by the addition of TMSOTf (145 μL, 0.4 mmol, 2.0 equiv). The reaction mixture was stirred overnight. The crude mixture was transferred into a 50 ml round bottom flask and diluted with dichloromethane (approximately 20 ml). NaOH (approximately 15 ml, 10% aq.) was added. The heterogenous mixture was vigorously stirred for 10-15 min. The aqueous layer was extracted with dichloromethane three times. The combined organic layer was dried over anhydrous MgSO<sub>4</sub> or Na<sub>2</sub>SO<sub>4</sub>. The solvent was removed *in vacuo* and the reaction was analysed by <sup>1</sup>H NMR using 1,1,2,2-tetrachloroethane as an internal standard displaying a quantitative crude yield.

## 2° 1,1-diphenylethylene

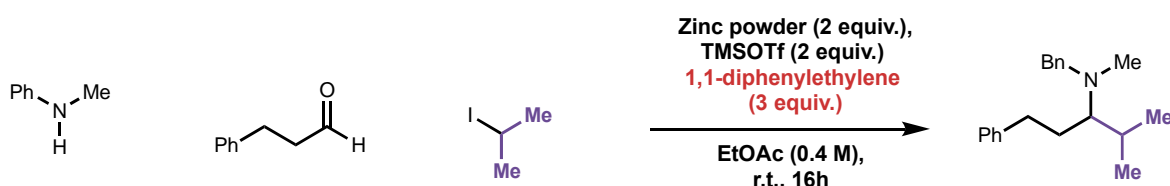

An oven dried vial (Biotage Microwave Process Vial (10 mL), equipped with gas-tight pierceable caps) was charged with a stirring bar and Zn dust (52 mg, 0.8 mmol, 2 equiv) and TEMPO (188 mg, 1.2 mmol, 3 equiv). The vial was sealed, evacuated and backfilled with N<sub>2</sub>. To this was added EtOAc (1 mL), followed by the N-methylbenzylamine (52 μL, 0.4 mmol, 1.0 equiv), hydrocinnamaldehyde (108 μL, 0.8 mmol, 2 equiv), 1,1-diphenylethylene (212 μL, 1.2 mmol, 3 equiv) and 2-iodopropane (120 μL, 1.2 mmol, 3 equiv). The reaction mixture was stirred for one minute, followed by the addition of TMSOTf (145 μL, 0.4 mmol, 2.0 equiv). The reaction mixture was stirred overnight. The crude mixture was transferred into a 50 ml round bottom flask and diluted with dichloromethane (approximately 20 ml). NaOH (approximately 15 ml, 10% aq.) was added. The heterogenous mixture was vigorously stirred for 10-15 min. The aqueous layer was extracted with dichloromethane three times. The combined organic layer was dried over anhydrous MgSO<sub>4</sub>. The solvent was removed *in vacuo* and the reaction was analysed by <sup>1</sup>H NMR using 1,1,2,2-tetrachloroethane as an internal standard displaying a 44% crude yield.

### 3° TEMPO

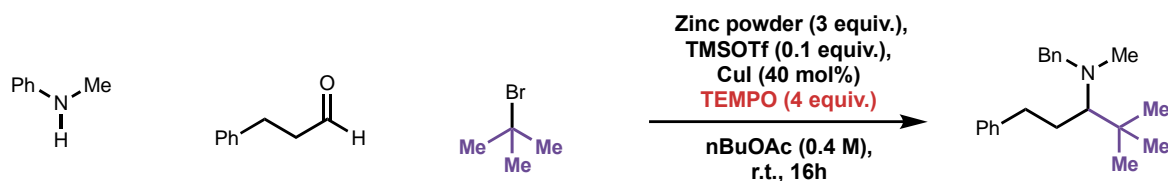

An oven dried vial (Biotage Microwave Process Vial (10 mL), equipped with gas-tight pierceable caps) was charged with a stirring bar, Zn dust (78 mg, 1.2 mmol, 3 equiv), copper iodide (30 mg, 0.16 mmol, 40 mol%) and TEMPO (250 mg, 1.6 mmol, 4 equiv). The vial was sealed, evacuated and backfilled with N<sub>2</sub>. To this was added *n*BuOAc (1 mL), followed by the N-methylbenzylamine (52 μL, 0.4 mmol, 1.0 equiv) and hydrocinnamaldehyde (108 μL, 0.8 mmol, 2 equiv). The mixture was stirred for 15 minutes then, whilst stirring, tert-butyl bromide (180 μL, 1.6 mmol, 4 equiv) was added. The reaction mixture was stirred overnight. The crude mixture was transferred into a 50 ml round bottom flask and diluted with dichloromethane (approximately 20 ml). NaOH (approximately 15 ml, 10% aq.) was added. The heterogenous mixture was vigorously stirred for 10-15 min. The aqueous layer was extracted with dichloromethane three times. The combined organic phases were washed with sat. Na<sub>2</sub>S<sub>2</sub>O<sub>3</sub> with 5 drops of 3 M HCl until the solution transformed from orange/red to yellow/colourless. The combined organic layer was dried over anhydrous MgSO<sub>4</sub>. The solvent was removed *in vacuo* and the reaction was analysed by LCMS and <sup>1</sup>H NMR. Trace product was detected by LCMS and <sup>1</sup>H NMR. A significant amount of the tert-butyl TEMPO adduct was detected by LCMS.

### 3° Styrene

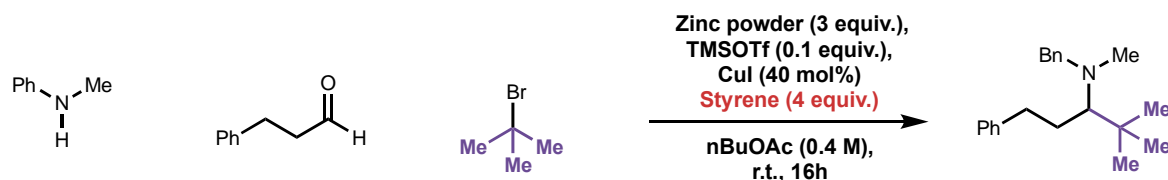

An oven dried vial (Biotage Microwave Process Vial (10 mL), equipped with gas-tight pierceable caps) was charged with a stirring bar, Zn dust (78 mg, 1.2 mmol, 3 equiv) and copper iodide (30 mg, 0.16 mmol, 40 mol%). The vial was sealed, evacuated and backfilled with N<sub>2</sub>. To this was added *n*BuOAc (1 mL), followed by the N-methylbenzylamine (52 μL, 0.4 mmol, 1.0 equiv), hydrocinnamaldehyde (108 μL, 0.8 mmol, 2 equiv) and styrene (183 μL, 1.6 mmol, 4 equiv). The mixture was stirred for 15 minutes then, whilst stirring, tert-butyl bromide (180 μL, 1.6 mmol, 4 equiv) was added. The reaction mixture was stirred overnight. The crude mixture was transferred into a 50 ml round bottom flask and diluted with dichloromethane (approximately 20 ml). NaOH (approximately 15 ml, 10% aq.) was added. The heterogenous mixture was vigorously stirred for 10-15 min. The aqueous layer was extracted with dichloromethane three times. The combined organic layer was dried over anhydrous MgSO<sub>4</sub>. The solvent was removed *in vacuo* and the reaction was analysed by <sup>1</sup>H NMR using 1,1,2,2-tetrachloroethane as an internal standard displaying a 36% crude yield.

### 3° 1,1-diphenylethylene

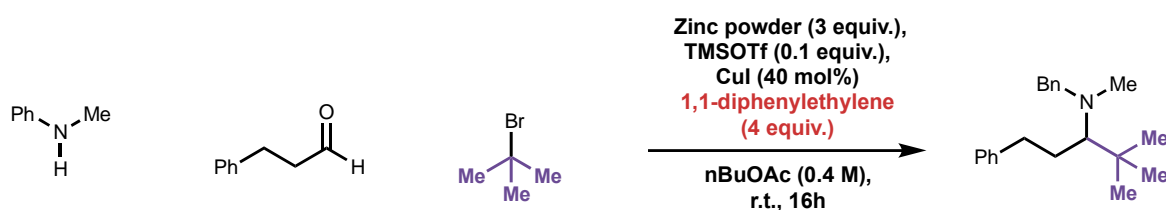

An oven dried vial (Biotage Microwave Process Vial (10 mL), equipped with gas-tight pierceable caps) was charged with a stirring bar, Zn dust (78 mg, 1.2 mmol, 3 equiv) and copper iodide (30 mg, 0.16 mmol, 40 mol%). The vial was sealed, evacuated and backfilled with N<sub>2</sub>. To this was added *n*BuOAc (1 mL), followed by the N-methylbenzylamine (52 μL, 0.4 mmol, 1.0 equiv), hydrocinnamaldehyde (108 μL, 0.8 mmol, 2 equiv) and 1,1-diphenylethylene (283 μL, 1.6 mmol, 4 equiv). The mixture was stirred for 15 minutes then, whilst stirring, tert-butyl bromide (180 μL, 1.6 mmol, 4 equiv) was added. The reaction mixture was stirred overnight. The crude mixture was transferred into a 50 ml round bottom flask and diluted with dichloromethane (approximately 20 ml). NaOH (approximately 15 ml, 10% aq.) was added. The heterogenous mixture was vigorously stirred for 10-15 min. The aqueous layer was extracted with dichloromethane three times. The combined organic layer was dried over anhydrous MgSO<sub>4</sub>. The solvent was removed *in vacuo* and the reaction was analysed by <sup>1</sup>H NMR using 1,1,2,2-tetrachloroethane as an internal standard displaying a 45% crude yield.

### RAE TEMPO

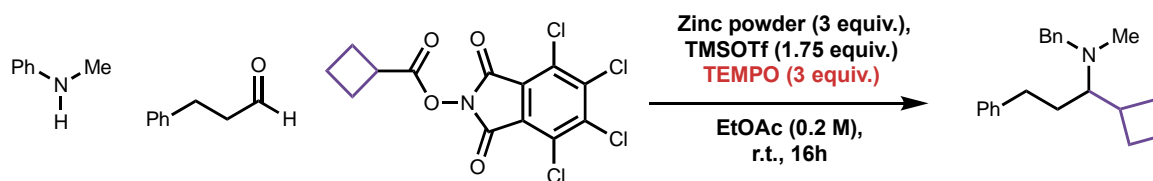

An oven dried vial (Biotage Microwave Process Vial 10 mL, equipped with gas-tight pierceable caps) was charged with a stirring bar. The vial was sealed, evacuated and backfilled with N<sub>2</sub>. To this was added EtOAc (0.5 mL), followed by N-methylbenzylamine (13 μL, 0.1 mmol, 1 equiv), hydrocinnamaldehyde (26 μL, 0.2 mmol, 2 equiv), TEMPO (188 mg, 1.2 mmol, 3 equiv) and TMSOTf (32 μL, 0.175 mmol, 1.75 equiv). The mixture was stirred for 15 mins. The cap was removed. Zinc (20 mg, 0.3 mmol, 3 equiv) and the 4,5,6,7-tetrachloro-1,3-dioxoisindolin-2-yl cyclobutanecarboxylate (77 mg, 0.2 mmol, 2 equiv) were added in one portion. The microwave vial was sealed, put under vacuum and refilled with N<sub>2</sub>. The mixture was stirred overnight. The crude mixture was transferred into a 50 ml round bottom flask and diluted with dichloromethane (approximately 20 ml). NaOH (approximately 15 ml, 10% aq.) was added. The heterogenous mixture was vigorously stirred for 10-15 min. The aqueous layer was extracted with dichloromethane three times. The combined organic phases were washed with sat. Na<sub>2</sub>S<sub>2</sub>O<sub>3</sub> with 5 drops of 3 M HCl until the solution transformed from orange/red to yellow/colourless. The combined organic layer was dried over anhydrous MgSO<sub>4</sub>. The solvent was removed *in vacuo* and the reaction was analysed by LCMS and <sup>1</sup>H NMR. No product was detected by LCMS and <sup>1</sup>H NMR. A significant amount of the cyclobutyl TEMPO adduct was detected by LCMS.

## RAE Styrene

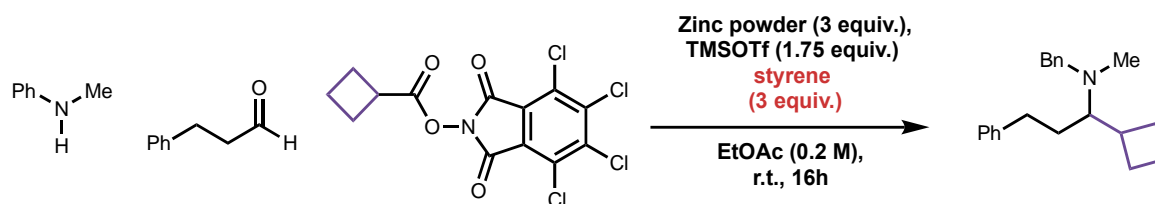

An oven dried vial (Biotage Microwave Process Vial 10 mL, equipped with gas-tight pierceable caps) was charged with a stirring bar. The vial was sealed, evacuated and backfilled with N<sub>2</sub>. To this was added EtOAc (0.5 mL), followed by N-methylbenzylamine (13 μL, 0.1 mmol, 1 equiv), hydrocinnamaldehyde (26 μL, 0.2 mmol, 2 equiv), styrene (137 μL, 1.2 mmol, 3 equiv) and TMSOTf (32 μL, 0.175 mmol, 1.75 equiv). The mixture was stirred for 15 mins. The cap was removed. Zinc (20 mg, 0.3 mmol, 3 equiv) and the 4,5,6,7-tetrachloro-1,3-dioxoisindolin-2-yl cyclobutanecarboxylate (77 mg, 0.2 mmol, 2 equiv) were added in one portion. The microwave vial was sealed, put under vacuum and refilled with N<sub>2</sub>. The mixture was stirred overnight. The crude mixture was transferred into a 50 ml round bottom flask and diluted with dichloromethane (approximately 20 ml). NaOH (approximately 15 ml, 10% aq.) was added. The heterogenous mixture was vigorously stirred for 10-15 min. The aqueous layer was extracted with dichloromethane three times. The combined organic layer was dried over anhydrous MgSO<sub>4</sub>. The solvent was removed *in vacuo* and the reaction was analysed by <sup>1</sup>H NMR using 1,1,2,2-tetrachloroethane as an internal standard displaying a 0% crude yield.

## RAE 1,1-diphenylethylene

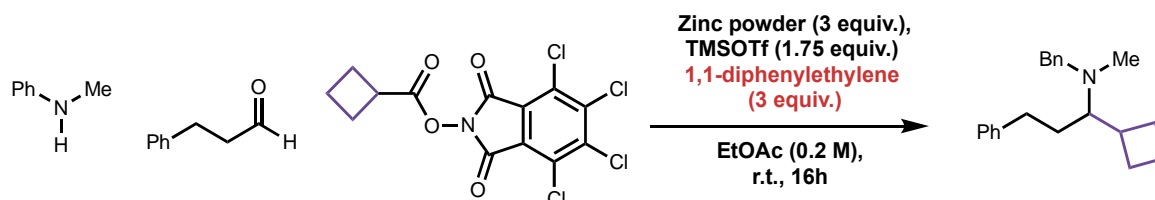

An oven dried vial (Biotage Microwave Process Vial 10 mL, equipped with gas-tight pierceable caps) was charged with a stirring bar. The vial was sealed, evacuated and backfilled with N<sub>2</sub>. To this was added EtOAc (0.5 mL), followed by N-methylbenzylamine (13 μL, 0.1 mmol, 1 equiv), hydrocinnamaldehyde (26 μL, 0.2 mmol, 2 equiv), 1,1-diphenylethylene (212 μL, 1.2 mmol, 3 equiv) and TMSOTf (32 μL, 0.175 mmol, 1.75 equiv). The mixture was stirred for 15 mins. The cap was removed. Zinc (20 mg, 0.3 mmol, 3 equiv) and the 4,5,6,7-tetrachloro-1,3-dioxoisindolin-2-yl cyclobutanecarboxylate (77 mg, 0.2 mmol, 2 equiv) were added in one portion. The microwave vial was sealed, put under vacuum and refilled with N<sub>2</sub>. The mixture was stirred overnight. The crude mixture was transferred into a 50 ml round bottom flask and diluted with dichloromethane (approximately 20 ml). NaOH (approximately 15 ml, 10% aq.) was added. The heterogenous mixture was vigorously stirred for 10-15 min. The aqueous layer was extracted with dichloromethane three times. The combined organic layer was dried over anhydrous MgSO<sub>4</sub>. The solvent was removed *in vacuo* and the reaction was analysed by <sup>1</sup>H NMR using 1,1,2,2-tetrachloroethane as an internal standard displaying a 0% crude yield.

## Ketone TEMPO

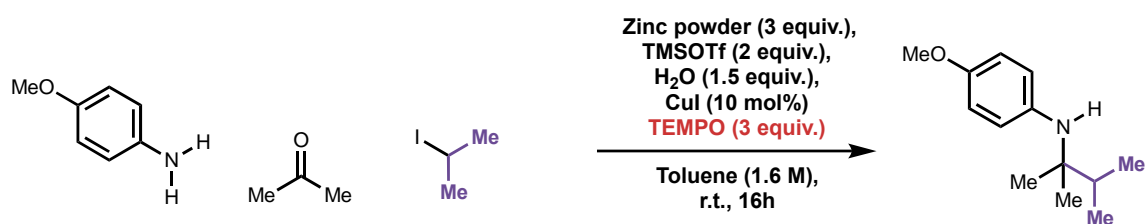

An oven dried vial (Biotage Microwave Process Vial 10 mL, equipped with gas-tight pierceable caps) was charged with a stirring bar, the *p*-anisidine (49 mg, 0.4 mmol, 1 equiv), Zn dust (79 mg, 1.2 mmol, 3 equiv), TEMPO (188 mg, 1.2 mmol, 3 equiv) and copper iodide (7.5 mg, 0.04 mmol, 10 mol%). The vial was sealed, evacuated and backfilled with N<sub>2</sub>. To this was added toluene (0.25 mL). While stirring, the acetone (44  $\mu$ L, 0.6 mmol, 1.5 equiv) was added dropwise, followed by the 2-iodopropane (120  $\mu$ L, 1.2 mmol, 3 equiv), H<sub>2</sub>O (11  $\mu$ L, 0.6 mmol, 1.5 equiv) and then TMSOTf (109  $\mu$ L, 0.6 mmol, 1.5 equiv). The mixture was stirred overnight. The mixture was diluted with dichloromethane and basified with NaOH (10%, aq). The heterogenous mixture was stirred vigorously for 15 mins. The organic and aqueous layers were separated. The aqueous layer was extracted with dichloromethane twice. The combined organic layer was dried over anhydrous MgSO<sub>4</sub>. The solvent was removed *in vacuo* and the reaction was analysed by LCMS and <sup>1</sup>H NMR. Trace product was detected by LCMS but not <sup>1</sup>H NMR. A significant amount of the isopropylTEMPO adduct was detected by LCMS.

## Ketone Styrene

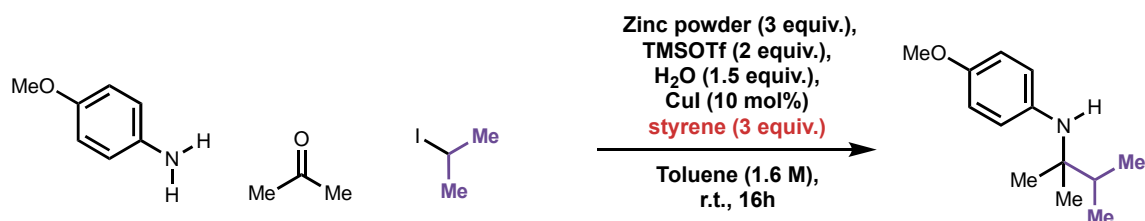

An oven dried vial (Biotage Microwave Process Vial 10 mL, equipped with gas-tight pierceable caps) was charged with a stirring bar, the *p*-anisidine (49 mg, 0.4 mmol, 1 equiv), Zn dust (79 mg, 1.2 mmol, 3 equiv) and copper iodide (7.5 mg, 0.04 mmol, 10 mol%). The vial was sealed, evacuated and backfilled with N<sub>2</sub>. To this was added toluene (0.25 mL). While stirring, the acetone (44  $\mu$ L, 0.6 mmol, 1.5 equiv) was added dropwise, followed by the 2-iodopropane (120  $\mu$ L, 1.2 mmol, 3 equiv), styrene (137  $\mu$ L, 1.2 mmol, 3 equiv), H<sub>2</sub>O (11  $\mu$ L, 0.6 mmol, 1.5 equiv) and then TMSOTf (109  $\mu$ L, 0.6 mmol, 1.5 equiv). The mixture was stirred overnight. The mixture was diluted with dichloromethane and basified with NaOH (10%, aq). The heterogenous mixture was stirred vigorously for 15 mins. The organic and aqueous layers were separated. The aqueous layer was extracted with dichloromethane twice. The combined organic layer was dried over MgSO<sub>4</sub>. The solvent was removed *in vacuo* and the reaction was analysed by <sup>1</sup>H NMR using 1,1,2,2-tetrachloroethane as an internal standard displaying a 74% crude yield.



## Ketone 1,1-diphenylethylene

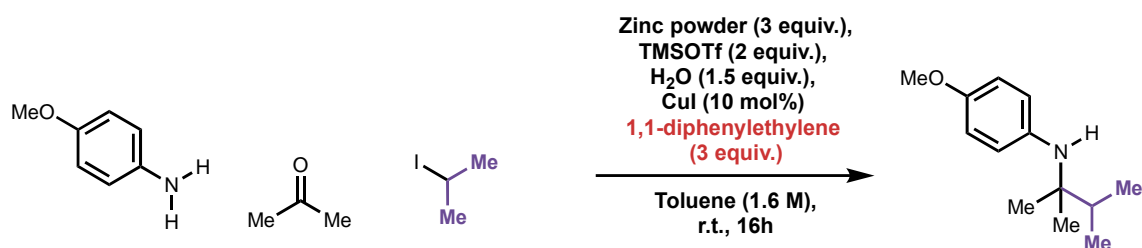

An oven dried vial (Biotage Microwave Process Vial 10 mL, equipped with gas-tight pierceable caps) was charged with a stirring bar, the *p*-anisidine (49 mg, 0.4 mmol, 1 equiv), Zn dust (79 mg, 1.2 mmol, 3 equiv) and copper iodide (7.5 mg, 0.04 mmol, 10 mol%). The vial was sealed, evacuated and backfilled with N<sub>2</sub>. To this was added toluene (0.25 mL). While stirring, the acetone (44 μL, 0.6 mmol, 1.5 equiv) was added dropwise, followed by the 2-iodopropane (120 μL, 1.2 mmol, 3 equiv), 1,1-diphenylethylene (212 μL, 1.2 mmol, 3 equiv), H<sub>2</sub>O (11 μL, 0.6 mmol, 1.5 equiv) and then TMSOTf (109 μL, 0.6 mmol, 1.5 equiv). The mixture was stirred overnight. The mixture was diluted with dichloromethane and basified with NaOH (10%, aq). The heterogenous mixture was stirred vigorously for 15 mins. The organic and aqueous layers were separated. The aqueous layer was extracted with dichloromethane twice. The combined organic layer was dried over MgSO<sub>4</sub>. The solvent was removed *in vacuo* and the reaction was analysed by <sup>1</sup>H NMR using 1,1,2,2-tetrachloroethane as an internal standard displaying a 46% crude yield.

## 10.5 Radical clock experiment

Recent approaches to determining alkyl zinc halide addition vs radical addition have used the ring opening of a cyclopropyl by the intermediate radical aminyl cation.<sup>25</sup> We undertook this study and found that mixtures of ring opened and cyclopropyl products were observed. However, the starting material was found to be partially unstable (23% degradation over the reaction time) under the reaction conditions. **Therefore, the results of these experiments are not accurate.**

### 10.5.1 Stability of amine under reaction conditions

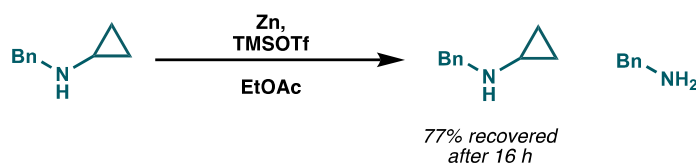

An oven dried vial (Biotage Microwave Process Vial (10 mL), equipped with gas-tight pierceable caps) was charged with a stirring bar and Zn dust (39 mg, 0.6 mmol, 3 equiv). The vial was sealed, evacuated and backfilled with N<sub>2</sub>. To this was added EtOAc (1 mL), followed by *N*-benzylcyclopropylamine (29 mg, 0.2 mmol, 1 equiv). The reaction mixture was stirred for 10s, followed by the addition of TMSOTf (54 μL, 0.3 mmol, 1.5 equiv). The reaction mixture was stirred overnight. The crude mixture was transferred into a 50 ml round bottom flask and diluted with dichloromethane (approximately 20 ml). NaOH (approximately 15 ml, 10% aq.) was added. The heterogenous mixture was vigorously stirred for 10 min.

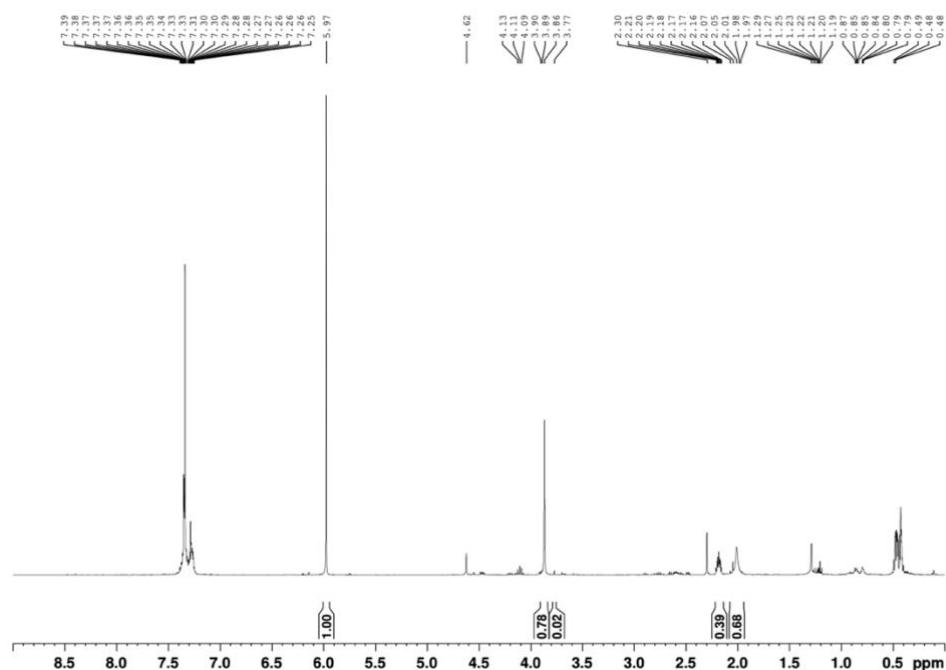

The aqueous layer was extracted with dichloromethane three times. The combined organic layer was dried over anhydrous MgSO<sub>4</sub>. Solvent was evaporated *in vacuo*. Yield of the recovered product was determined by <sup>1</sup>H NMR using 1,1,2,2-tetrachloroethane as internal standard indicating a 72% yield based on the heptet peak at 2.18 ppm (spectrum shown below).

### 10.5.1 Primary alkyl halide ring opening (*inaccurate due to degradation*)

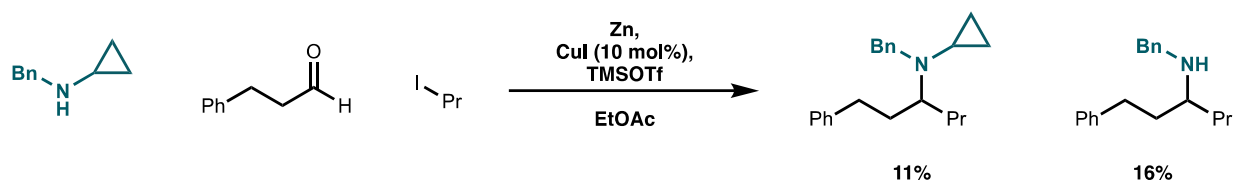

An oven dried vial (Biotage Microwave Process Vial (10 mL), equipped with gas-tight pierceable caps) was charged with a stirring bar, copper iodide (15 mg, 0.08 mmol, 0.4 equiv) and Zn (39 mg, 0.6 mmol, 3 equiv). The vial was sealed, evacuated and backfilled with N<sub>2</sub>. To this was added *n*BuOAc (0.25 mL), followed by *N*-benzylcyclopropylamine (29 mg, 0.2 mmol, 1 equiv) and hydrocinnamaldehyde (108  $\mu$ L, 0.3 mmol, 1.5 equiv). The mixture was stirred for 15 min. 1-iodopropane (156  $\mu$ L, 1.6 mmol, 4 equiv) was added. The reaction mixture was stirred for 10s, followed by the addition of TMSOTf (54  $\mu$ L, 0.3 mmol, 1.5 equiv). The reaction mixture was stirred overnight. The crude mixture was transferred into a 50 ml round bottom flask and diluted with dichloromethane (approximately 20 ml). NaOH (approximately 15 ml, 10% aq.) was added. The heterogenous mixture was vigorously stirred for 10 min. The aqueous layer was extracted with dichloromethane three times. The combined organic layer was dried over anhydrous MgSO<sub>4</sub>. Solvent was evaporated *in vacuo*. The mixture was purified by column chromatography (3%–80% Et<sub>2</sub>O in Pet. Ether) to afford *N*-benzyl-*N*-(1-phenylpentan-3-yl)cyclopropanamine (colourless oil, 6.8 mg, 11%) and *N*-benzyl-1-phenylpentan-3-amine (colourless oil, 8.7 mg, 16%).

#### *N*-benzyl-*N*-(1-phenylpentan-3-yl)cyclopropanamine

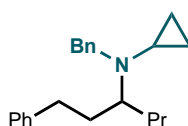

<sup>1</sup>H NMR (400 MHz, CDCl<sub>3</sub>):  $\delta$  7.32 - 7.14 (m, 10H), 3.77 (d, *J* = 13.7 Hz, 1H), 3.71 (d, *J* = 13.7 Hz, 1H), 2.74 (ddd, *J* = 15.8, 10.4, 5.6 Hz, 1H), 2.63 (quint, *J* = 6.5 Hz, 1H), 2.53 (ddd, *J* = 15.8, 10.5, 5.8 Hz, 1H), 2.08 - 2.01 (m, 1H), 1.96 - 1.85 (m, 1H), 1.72 - 1.59 (m, 2H), 1.41 - 1.25 (m, 3H), 0.88 (t, *J* = 7.1 Hz, 3H), 0.39 - 0.33 (m, 2H), 0.29 - 0.23 (m, 2H).

<sup>13</sup>C NMR (100 MHz, CDCl<sub>3</sub>):  $\delta$  143.3, 141.6, 129.2, 128.5, 128.4, 128.0, 126.5, 125.7, 61.1, 56.0, 33.9, 33.7, 33.1, 32.8, 20.6, 14.4, 7.6, 7.0.

IR (film, cm<sup>-1</sup>): 3062, 3026, 2954, 2929, 2869, 1603, 1495, 1453, 1377, 1346, 1018, 749, 715, 697.

HRMS: *m/z* calcd for C<sub>22</sub>H<sub>29</sub>N [M+H]<sup>+</sup> 308.2373, found 308.2379.

## N-benzyl-1-phenylpentan-3-amine

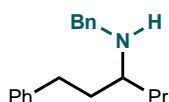

$^1\text{H NMR}$  (500 MHz,  $\text{CDCl}_3$ ):  $\delta$  7.34 - 7.31 (m, 4H), 7.30 - 7.23 (m, 3H), 7.20 - 7.16 (m, 3H), 3.76 (s, 2H), 2.69 - 2.59 (m, 3H), 1.79 - 1.72 (m, 2H), 1.53 - 1.30 (m, 5H), 0.90 (t,  $J = 7.3$  Hz, 3H)

$^{13}\text{C NMR}$  (125 MHz,  $\text{CDCl}_3$ ):  $\delta$  142.9, 141.2, 128.49, 128.45, 128.3, 126.9, 125.8, 56.3, 51.2, 36.5, 36.0, 32.1, 19.1, 14.5.

**IR** (film,  $\text{cm}^{-1}$ ): 3340 (br), 3026, 2955, 2926, 2854, 1602, 1495, 1454, 1072, 1029, 908, 734, 698.

**HRMS**:  $m/z$  calcd for  $\text{C}_{19}\text{H}_{25}\text{N}$   $[\text{M}+\text{H}]^+$  268.2060, found 268.2065

### 10.5.1 Secondary alkyl halide ring opening (*inaccurate due to degradation*)

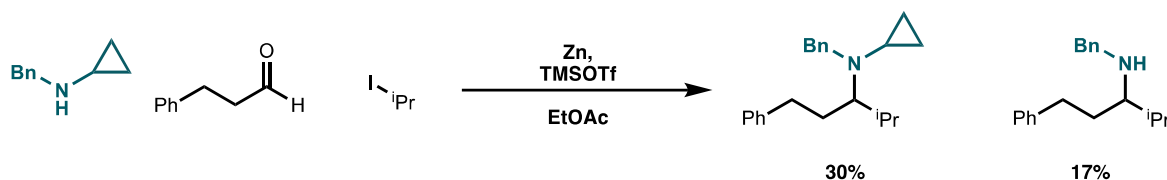

*N*-benzylcyclopropylamine (29 mg, 0.2 mmol, 1 equiv) and zinc (26 mg, 0.4 mmol, 2 equiv) were added to a Biotage Microwave Process microwave vial (10 mL). The vial was sealed, put under vacuum and refilled with  $\text{N}_2$ . EtOAc (1 mL) was added. While stirring, hydrocinnamaldehyde (40  $\mu\text{L}$ , 0.3 mmol, 1.5 equiv), 2-iodopropane (40  $\mu\text{L}$ , 0.4 mmol, 2 equiv) and TMSOTf (72  $\mu\text{L}$ , 0.4 mmol, 2 equiv) were added. The mixture was stirred overnight. The mixture was diluted with dichloromethane and transferred to a round-bottom flask. NaOH (10%, aq) was added. The heterogeneous mixture was stirred vigorously for 15 mins. The aqueous and organic layers were separated. The aqueous layer was extracted twice with dichloromethane. The combined organic layer was dried over  $\text{Na}_2\text{SO}_4$  and filtered. Solvent was removed *in vacuo*. The mixture was purified by column chromatography (5%–70% Et<sub>2</sub>O in Pet. Ether) to afford *N*-benzyl-*N*-(4-methyl-1-phenylpentan-3-yl)cyclopropanamine (colourless oil, 19 mg, 30%) and *N*-benzyl-4-methyl-1-phenylpentan-3-amine (colourless oil, 9.2 mg, 17%).

**N-benzyl-N-(4-methyl-1-phenylpentan-3-yl)cyclopropanamine**

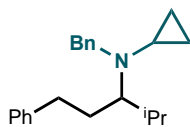

**<sup>1</sup>H NMR** (400 MHz, CDCl<sub>3</sub>) δ 7.35 – 7.30 (m, 6H), 7.28 – 7.17 (m, 4H), 3.88 (s, 2H), 2.93 – 2.83 (m, 1H), 2.62 – 2.46 (m, 2H), 2.25 – 2.16 (m, 1H), 2.11 – 1.91 (m, 2H), 1.81-1.69 (m, 1H), 0.99 – 1.06 (m, 6H), 0.41 – 0.23 (m, 4H).

**<sup>13</sup>C NMR** (101 MHz, CDCl<sub>3</sub>) δ 143.4, 141.6, 129.4, 128.5, 128.4, 127.9, 126.6, 125.7, 67.4, 56.5, 34.99, 34.95, 30.9, 30.0, 22.3, 20.5, 7.8, 7.7.

**IR** (film, cm<sup>-1</sup>): 3025, 2927, 2866, 1494, 1452, 1028, 748, 696.

**HRMS:** m/z calcd for C<sub>20</sub>H<sub>30</sub>N [M+H]<sup>+</sup> 308.2373; found 308.2373.

## 10.5 Tether alkene aminyl radical cation traps

### 10.5.1 Aminyl radical cation experiments

The use of tethered alkenes to undergo a 5-exo radical cyclisation to trap aminyl radical cations has been used to synthesize cyclic amines and as a mechanism probe in the literature.<sup>26,27</sup>

Based on this literature we attempted to use 4-pentenal and pent-4-en-1-amine hydrochloride as independent traps under our standard conditions to investigate this cyclisation.

### 10.5.2 Initial cyclisation attempts with isopropyl iodide

Initial investigations onto the feasibility of this trap were conducted below with variations using different aldehydes, radical traps and HAT reagents. Unfortunately, none of these improved the reaction profiles in a useful manner and would have clouded the results. Instead, in section 10.5.3, we have provided the results of the standard trap experiments for all structural classes.

#### 2° Aldehyde tethered alkene

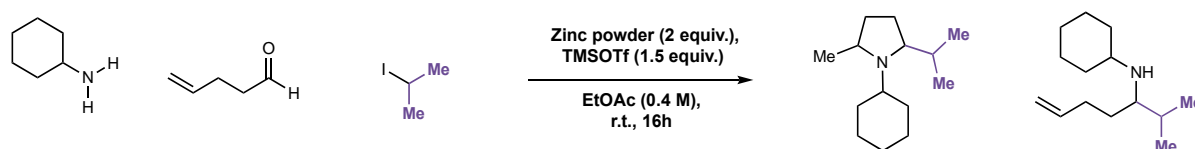

An oven dried vial (Biotage Microwave Process Vial (10 mL), equipped with gas-tight pierceable caps) was charged with a stirring bar and Zn dust (52 mg, 0.8 mmol, 2 equiv) and TEMPO (188 mg, 1.2 mmol, 3 equiv). The vial was sealed, evacuated and backfilled with N<sub>2</sub>. To this was added EtOAc (1 mL), followed by the cyclohexylamine (46 μL, 0.4 mmol, 1.0 equiv), 4-pentenal (79 μL, 0.8 mmol, 2 equiv), and 2-iodopropane (120 μL, 1.2 mmol, 3 equiv). The reaction mixture was stirred for one minute, followed by the addition of TMSOTf (106 μL, 0.6 mmol, 1.5 equiv). The reaction mixture was stirred overnight. The crude mixture was transferred into a 50 ml round bottom flask and diluted with dichloromethane (approximately 20 ml). NaOH (approximately 15 ml, 10% aq.) was added. The heterogenous mixture was vigorously stirred for 10-15 min. The aqueous layer was extracted with dichloromethane three times. The combined organic layer was dried over anhydrous MgSO<sub>4</sub>. The solvent was removed *in vacuo* and the reaction was analysed by <sup>1</sup>H NMR using 1,1,2,2-tetrachloroethane as an internal standard and LCMS analysis. <sup>1</sup>H NMR analysis showed a diverse mixture was present. LCMS analysis showed a wide variety of products. An extracted ion spectrum showed the presence of 2 major peaks corresponding to the expected products. Additionally, another extracted ion spectrum showed trace peaks indicating traces of the addition of the cyclised alkene radical intermediate to another iminium.

The  $^1\text{H}$  NMR of the resulting reaction mixture using 1,1,2,2-tetrachloroethane as an internal standard.

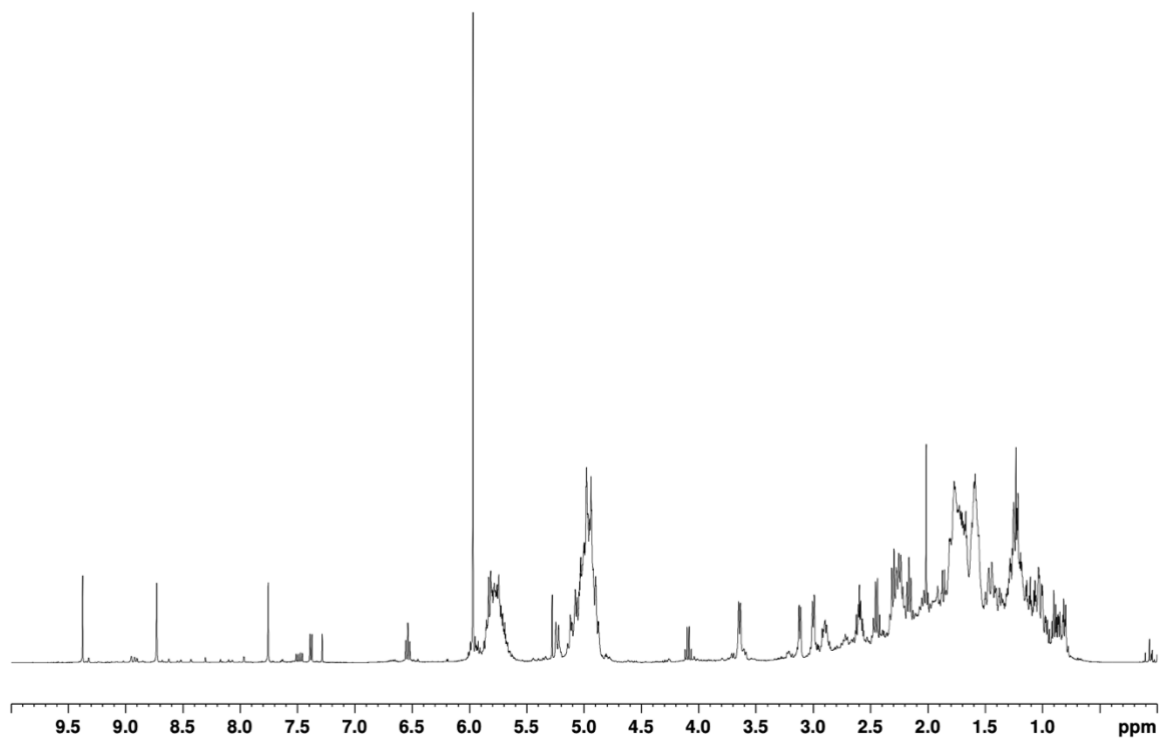

The LCMS TIC (+) and TIC (-) trace of the overall reaction mixture with extracted ion spectrums below

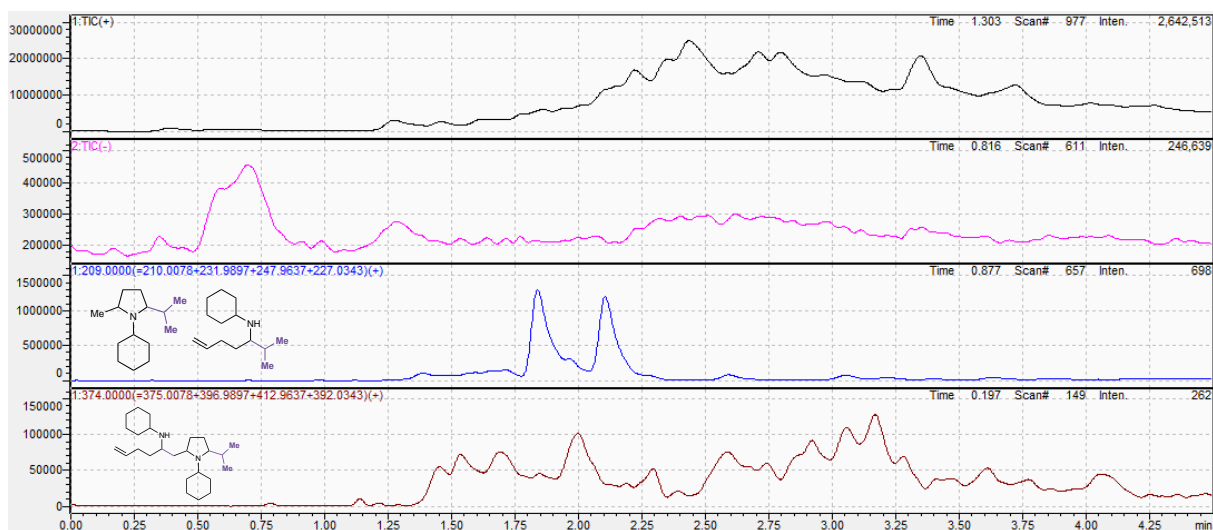

Further to these experiments several variations were attempted, using the same procedure as above, shown in the table below. Corresponding LCMS traces with extracted ion spectrums of the expected products and radical trap adducts are shown.

| Experiment | Aldehyde       | HAT or Radical Trap added |
|------------|----------------|---------------------------|
| A          | 4-Pentenal     | Et <sub>3</sub> SiH       |
| B          | 4-Pentenal     | Ph <sub>3</sub> SiH       |
| C          | 4-Pentenal     | TolS-STol                 |
| D          | cis-4-Heptenal | None                      |
| E          | cis-4-Heptenal | PhS-SPh                   |
| F          | cis-4-Heptenal | I <sub>2</sub>            |
| G          | cis-4-Heptenal | <sup>t</sup> BuSH         |

Experiment A – LCMS TIC and extracted ion spectrums

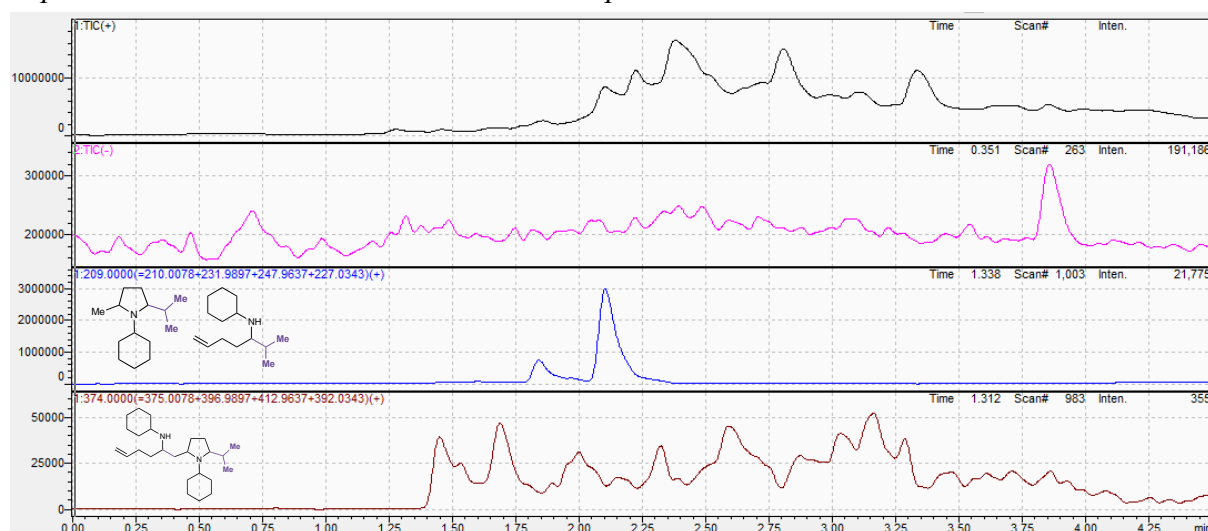

Experiment B – LCMS TIC and extracted ion spectrums

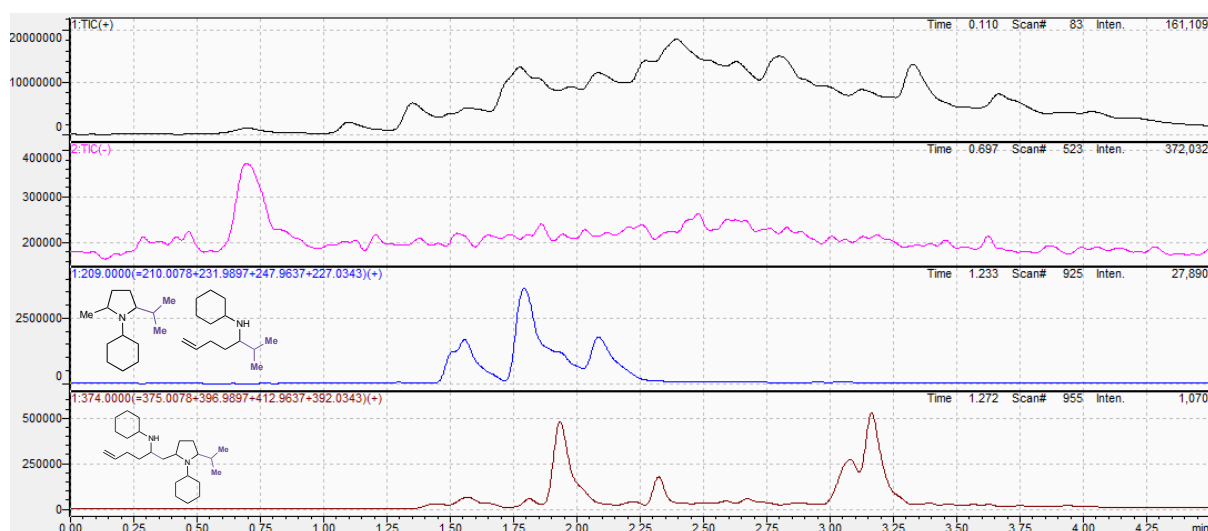



Experiment C – LCMS TIC and extracted ion spectrums

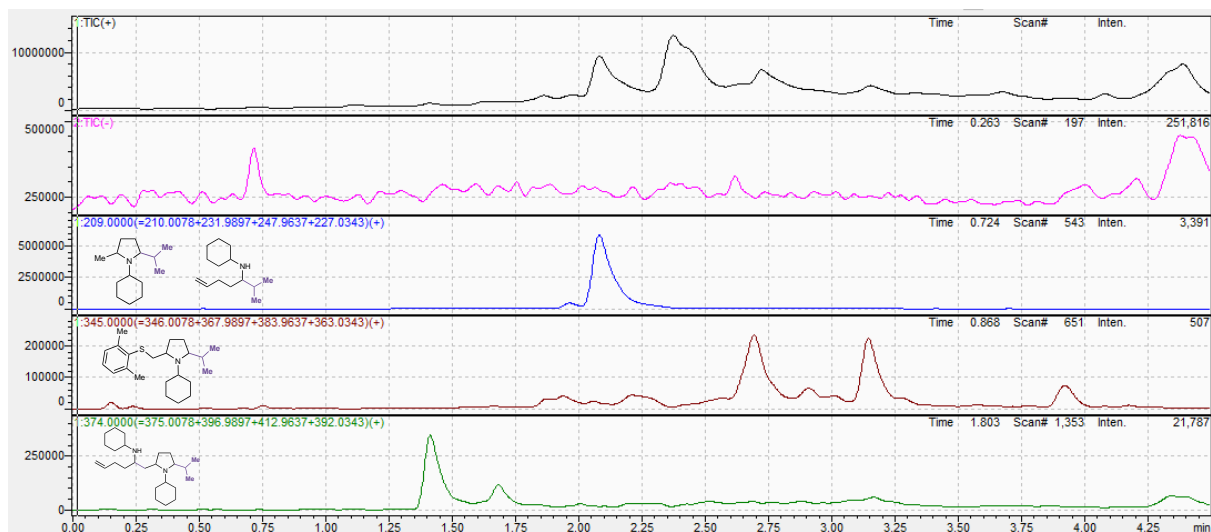

Experiment D – LCMS TIC and extracted ion spectrums

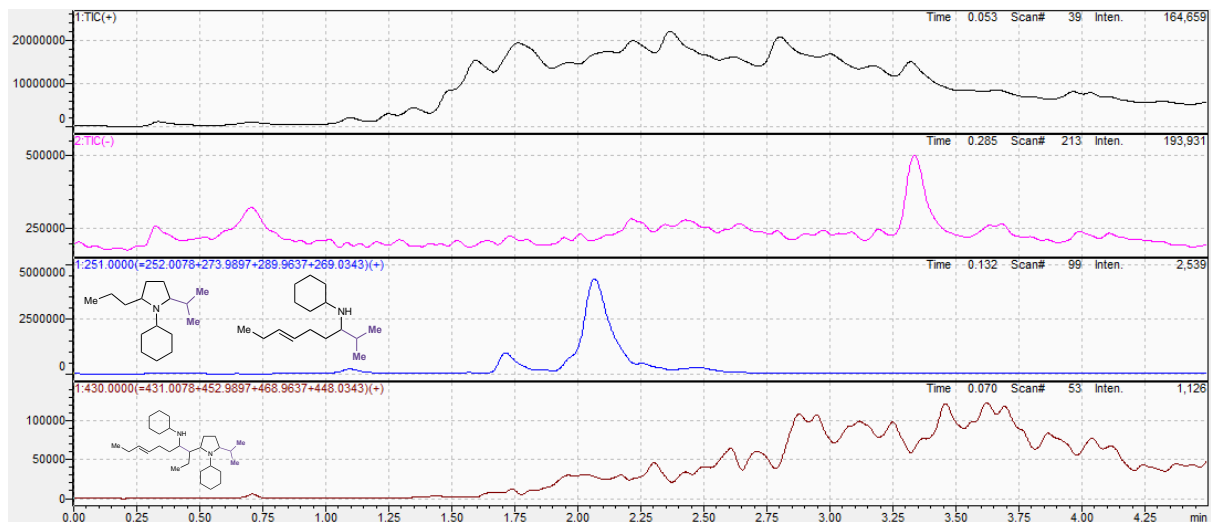

Experiment E – LCMS TIC and extracted ion spectrums

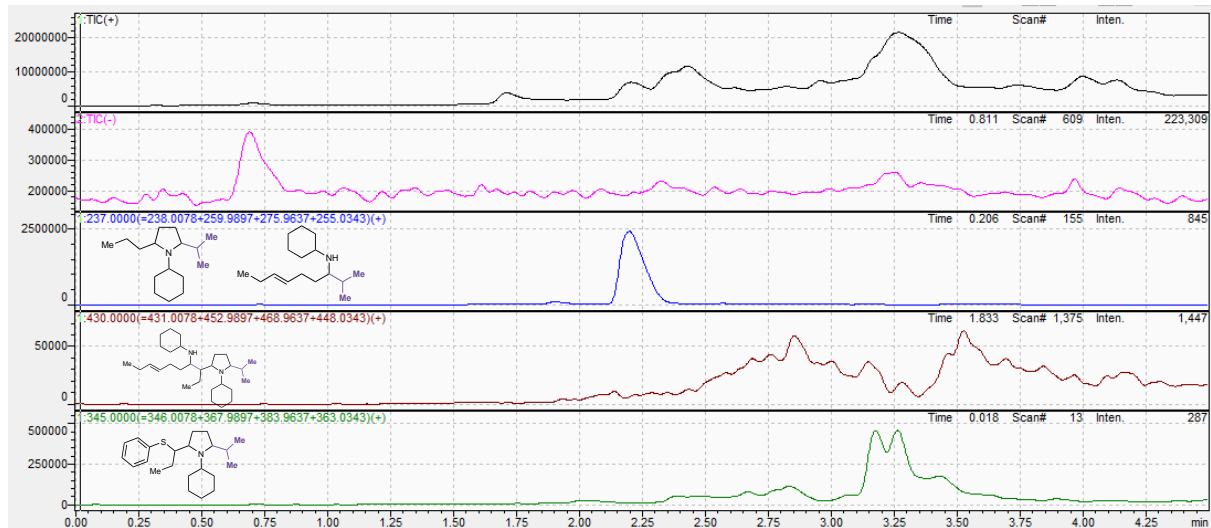

Experiment F – LCMS TIC and extracted ion spectrums

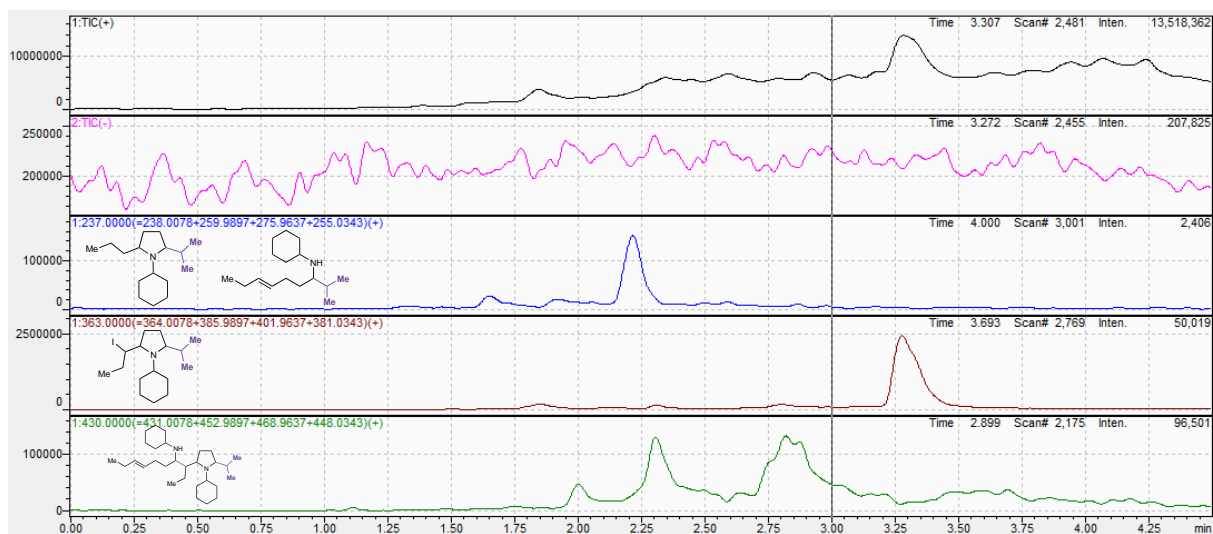

Experiment G – LCMS TIC and extracted ion spectrums

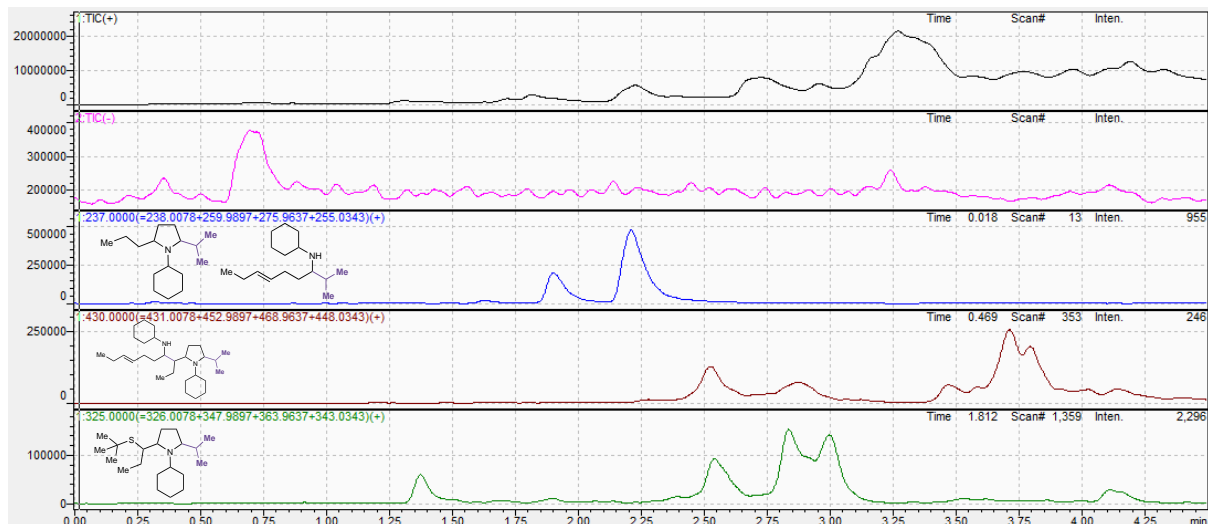

## Section 10.5.3 Standardised amine and aldehyde tethered alkene trapping experiments

### 2° Amine tethered alkene

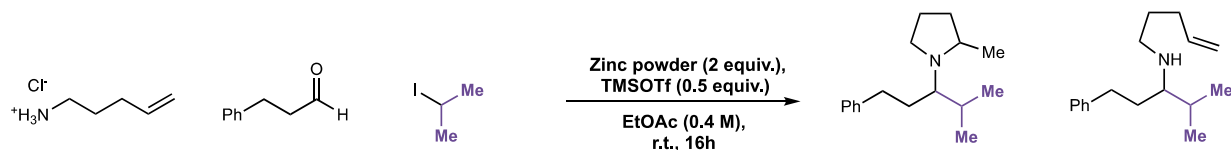

An oven dried vial (Biotage Microwave Process Vial (10 mL), equipped with gas-tight pierceable caps) was charged with a stirring bar, Zn (52 mg, 0.8 mmol, 2 equiv) and pent-4-en-1-amine hydrochloride (49 mg, 0.4 mmol, 1 equiv). The vial was sealed, evacuated and backfilled with N<sub>2</sub>. To this was added EtOAc (1 mL), followed by hydrocinnamaldehyde (108 μL, 0.8 mmol, 2 equiv) and 2-iodopropane (120 μL, 1.2 mmol, 3 equiv). The reaction mixture was stirred for one minute, followed by the addition of TMSOTf (36 μL, 0.2 mmol, 0.5 equiv). The reaction mixture was stirred overnight. The crude mixture was transferred into a 50 ml round bottom flask and diluted with dichloromethane (approximately 20 ml). NaOH (approximately 15 ml, 10% aq.) was added. The heterogenous mixture was vigorously stirred for 10-15 min. The aqueous layer was extracted with dichloromethane three times. The combined organic layer was dried over anhydrous MgSO<sub>4</sub>. The solvent was removed *in vacuo* and the reaction was analysed by <sup>1</sup>H NMR using 1,1,2,2-tetrachloroethane as an internal standard and LCMS analysis. <sup>1</sup>H NMR analysis showed a diverse mixture was present. LCMS analysis showed a wide variety of products. An extracted ion spectrum showed the presence of 2 major peaks corresponding to the expected products. Additionally, another extracted ion spectrum showed trace peaks showing the presence of the addition of the cyclised alkene radical intermediate to another iminium.

*The <sup>1</sup>H NMR of the resulting reaction mixture using 1,1,2,2-tetrachloroethane as an internal standard.*

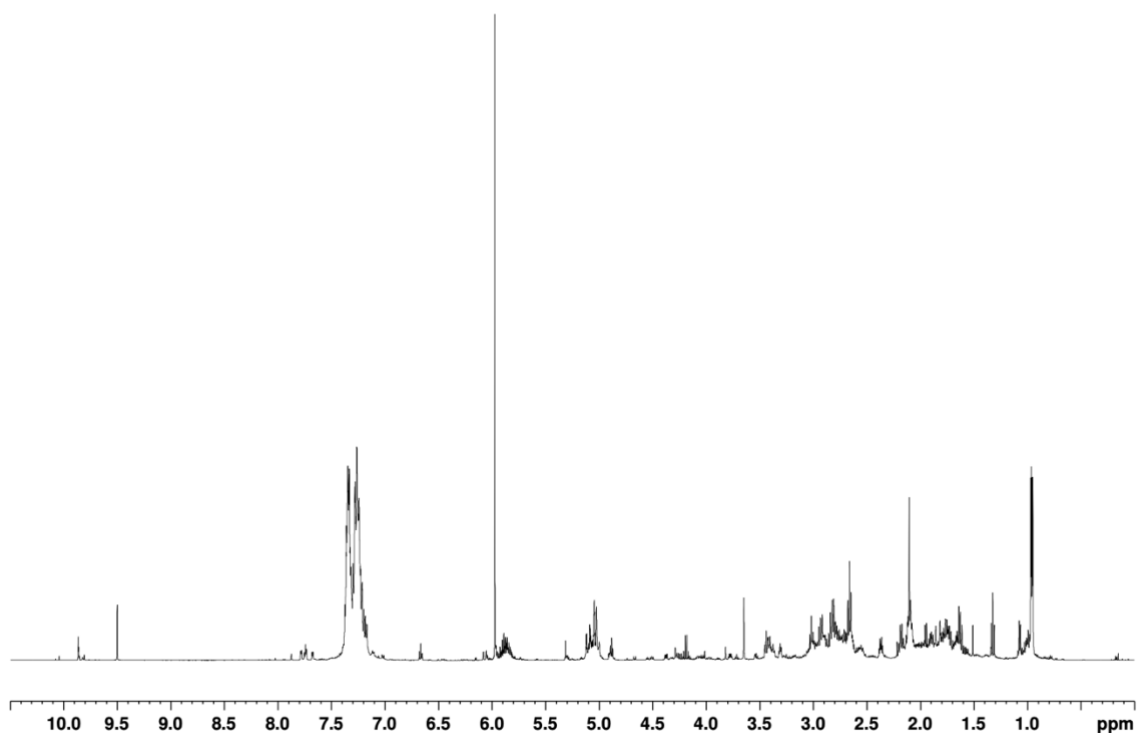

The LCMS TIC (+) and TIC (-) trace of the overall reaction mixture with extracted ion spectrums below

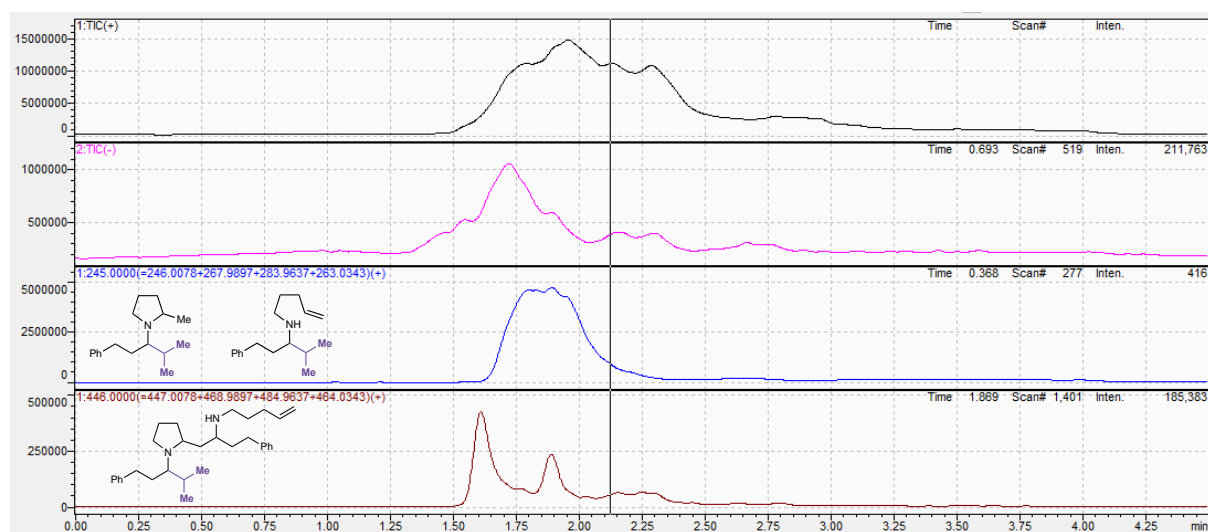

### 1° Amine tethered alkene

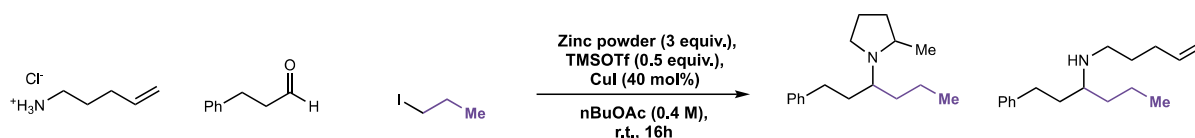

An oven dried vial (Biotage Microwave Process Vial (10 mL), equipped with gas-tight pierceable caps) was charged with a stirring bar, Zn dust (78 mg, 1.2 mmol, 3 equiv), copper iodide (30 mg, 0.16 mmol, 40 mol%) and pent-4-en-1-amine hydrochloride (49 mg, 0.4 mmol, 1 equiv). The vial was sealed, evacuated and backfilled with N<sub>2</sub>. To this was added *n*BuOAc (1 mL), followed by and hydrocinnamaldehyde (108 μL, 0.8 mmol, 2 equiv). The mixture was stirred for 15 minutes then, whilst stirring, 1-iodopropane (156 μL, 1.6 mmol, 4 equiv), and TMSOTf (106 μL, 0.6 mmol, 1.5 equiv) were added. The reaction mixture was stirred overnight. The crude mixture was transferred into a 50 ml round bottom flask and diluted with dichloromethane (approximately 20 mL). NaOH (approximately 15 ml, 10% aq.) was added. The heterogenous mixture was vigorously stirred for 10-15 min. The aqueous layer was extracted with dichloromethane three times. The combined organic layer was dried over anhydrous MgSO<sub>4</sub>. The solvent was removed *in vacuo* and the reaction was analysed by <sup>1</sup>H NMR using 1,1,2,2-tetrachloroethane as an internal standard and LCMS analysis. <sup>1</sup>H NMR analysis showed a diverse mixture was present. LCMS analysis showed a wide variety of products. An extracted ion spectrum showed the presence of 2 major peaks corresponding to the expected products. Additionally, another extracted ion spectrum showed trace peaks showing the presence of the addition of the cyclised alkene radical intermediate to another iminium.

The  $^1\text{H}$  NMR of the resulting reaction mixture using 1,1,2,2-tetrachloroethane as an internal standard.

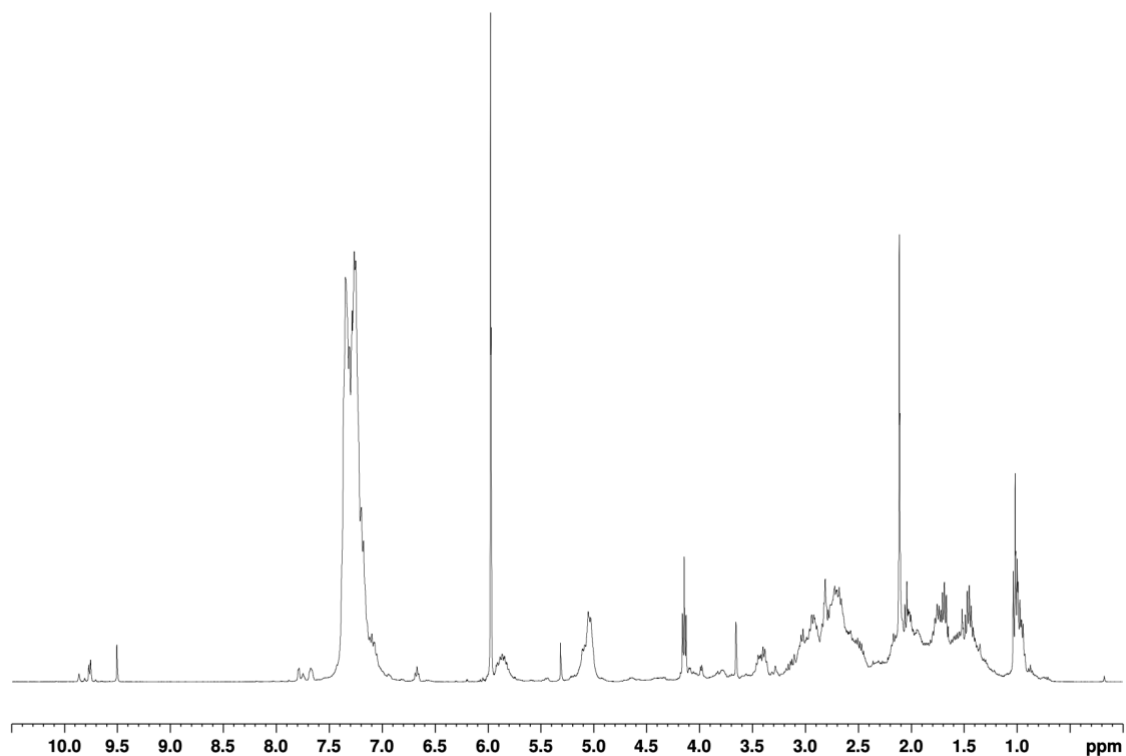

The LCMS TIC (+) and TIC (-) trace of the overall reaction mixture with extracted ion spectrums below

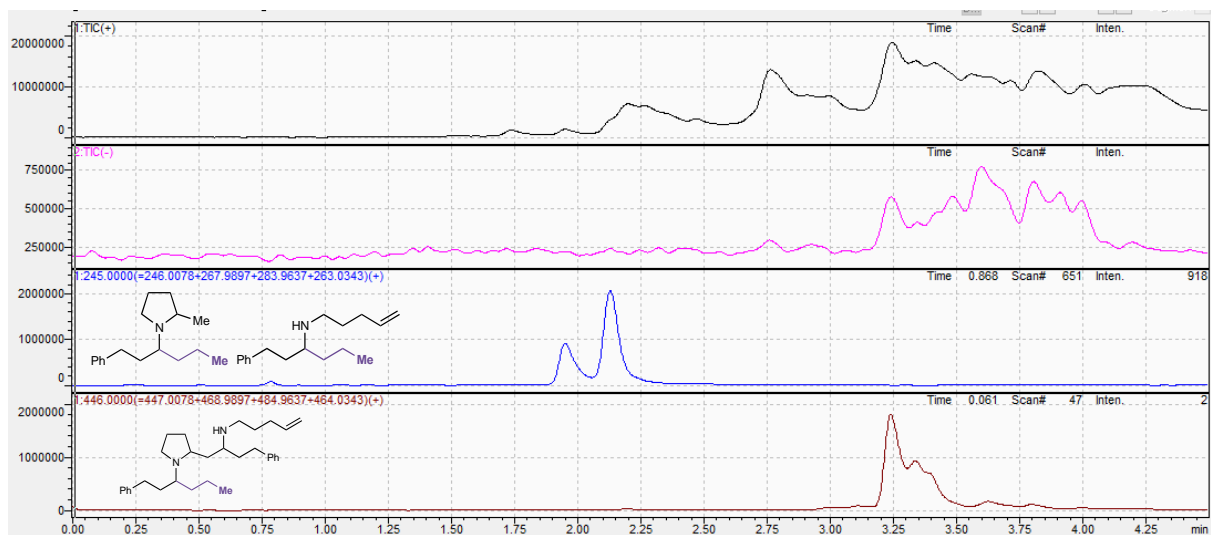

## 1° Aldehyde tethered alkene

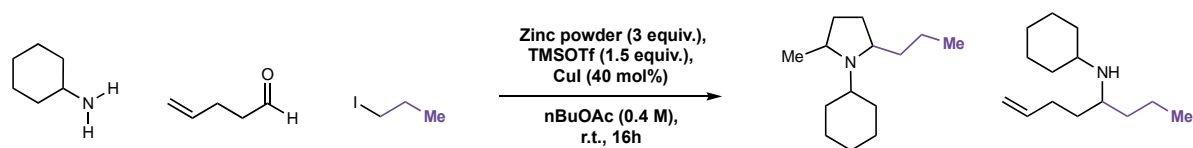

An oven dried vial (Biotage Microwave Process Vial (10 mL), equipped with gas-tight pierceable caps) was charged with a stirring bar, Zn (78 mg, 1.2 mmol, 3 equiv) and copper iodide (30 mg, 0.16 mmol, 40 mol%). The vial was sealed, evacuated and backfilled with N<sub>2</sub>. To this was added *n*BuOAc (1 mL), followed by the cyclohexylamine (46 μL, 0.4 mmol, 1.0 equiv) and 4-pentenal (79 μL, 0.8 mmol, 2 equiv). The mixture was stirred for 15 minutes then, whilst stirring, 1-iodopropane (156 μL, 1.6 mmol, 4 equiv), and TMSOTf (106 μL, 0.6 mmol, 1.5 equiv) were added. The reaction mixture was stirred overnight. The crude mixture was transferred into a 50 ml round bottom flask and diluted with dichloromethane (approximately 20 ml). NaOH (approximately 15 ml, 10% aq.) was added. The heterogenous mixture was vigorously stirred for 10-15 min. The aqueous layer was extracted with dichloromethane three times. The combined organic layer was dried over anhydrous MgSO<sub>4</sub>. The solvent was removed *in vacuo* and the reaction was analysed by <sup>1</sup>H NMR using 1,1,2,2-tetrachloroethane as an internal standard and LCMS analysis. <sup>1</sup>H NMR analysis showed a diverse mixture was present. LCMS analysis showed a wide variety of products. An extracted ion spectrum showed the presence of 2 major peaks corresponding to the expected products. Additionally, another extracted ion spectrum showed trace peaks showing the presence of the addition of the cyclised alkene radical intermediate to another iminium.

The <sup>1</sup>H NMR of the resulting reaction mixture using 1,1,2,2-tetrachloroethane as an internal standard

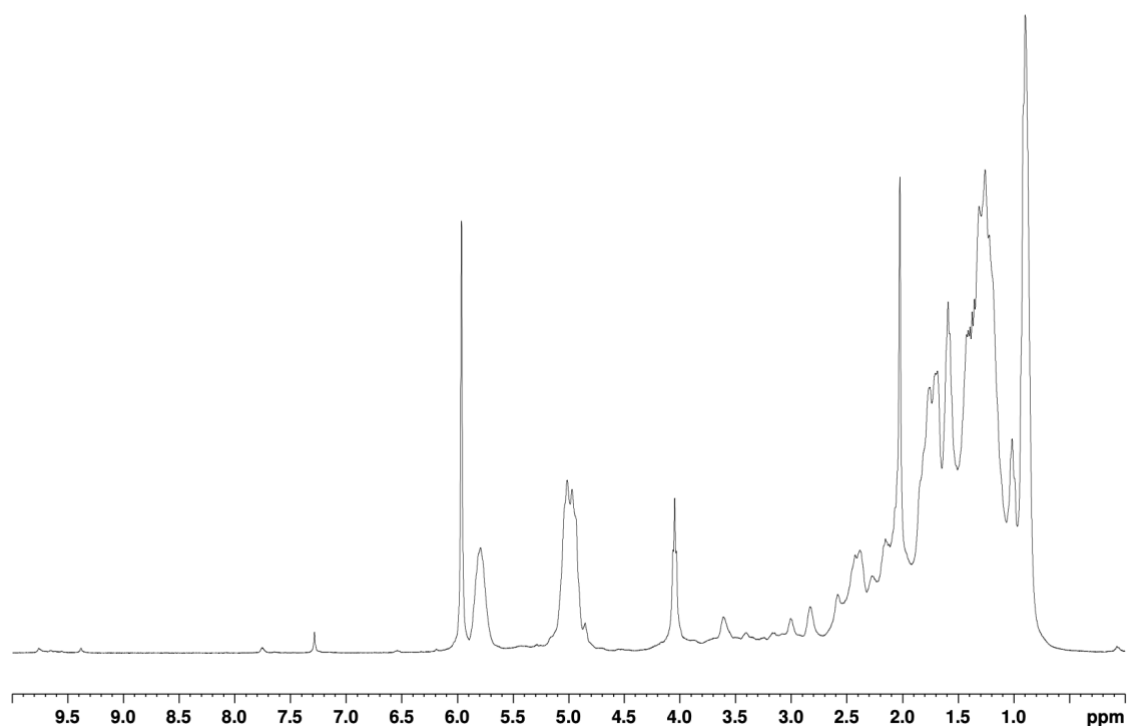

The LCMS TIC (+) and TIC (-) trace of the overall reaction mixture with extracted ion spectrums below

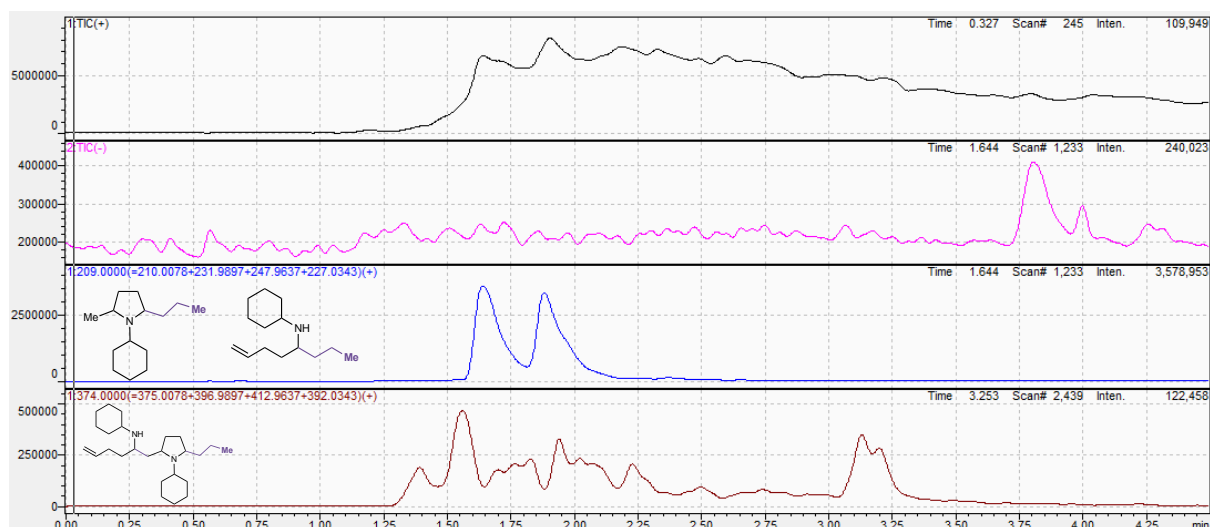

### 3° Amine tethered alkene

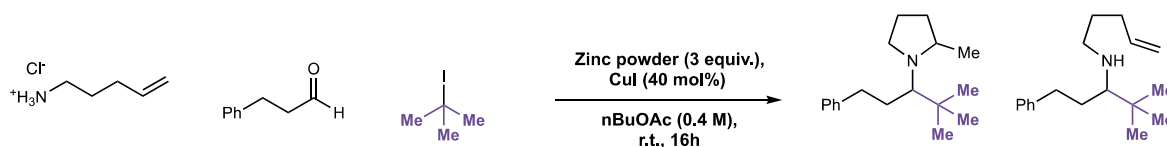

An oven dried vial (Biotage Microwave Process Vial (10 mL), equipped with gas-tight pierceable caps) was charged with a stirring bar, Zn dust (78 mg, 1.2 mmol, 3 equiv), copper iodide (30 mg, 0.16 mmol, 40 mol%) and pent-4-en-1-amine hydrochloride (49 mg, 0.4 mmol, 1 equiv). The vial was sealed, evacuated and backfilled with N<sub>2</sub>. To this was added *n*BuOAc (1 mL), followed by hydrocinnamaldehyde (108 μL, 0.8 mmol, 2 equiv). The mixture was stirred for 15 minutes then, whilst stirring, tert-butyl iodide (143 μL, 1.2 mmol, 3 equiv) was added. The reaction mixture was stirred overnight. The crude mixture was transferred into a 50 ml round bottom flask and diluted with dichloromethane (approximately 20 ml). NaOH (approximately 15 ml, 10% aq.) was added. The heterogenous mixture was vigorously stirred for 10-15 min. The aqueous layer was extracted with dichloromethane three times. The combined organic layer was dried over anhydrous MgSO<sub>4</sub>. The solvent was removed *in vacuo* and the reaction was analysed by <sup>1</sup>H NMR using 1,1,2,2-tetrachloroethane as an internal standard and LCMS analysis. LCMS analysis showed a wide variety of products. An extracted ion spectrum showed the presence of 1 major peak corresponding to the expected products. Additionally, another extracted ion spectrum showed trace peaks showing the presence of the cyclised alkene radical intermediate to another iminium.

The  $^1\text{H}$  NMR of the resulting reaction mixture using 1,1,2,2-tetrachloroethane as an internal standard

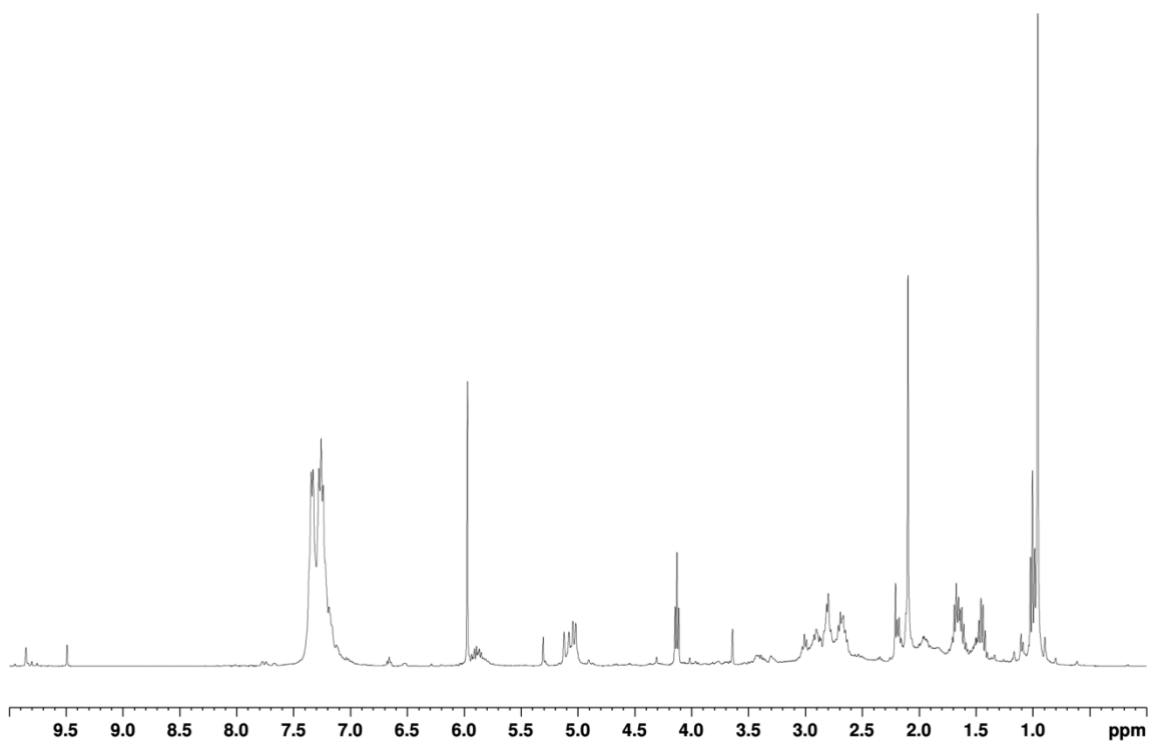

The LCMS TIC (+) and TIC (-) trace of the overall reaction mixture with extracted ion spectrums below

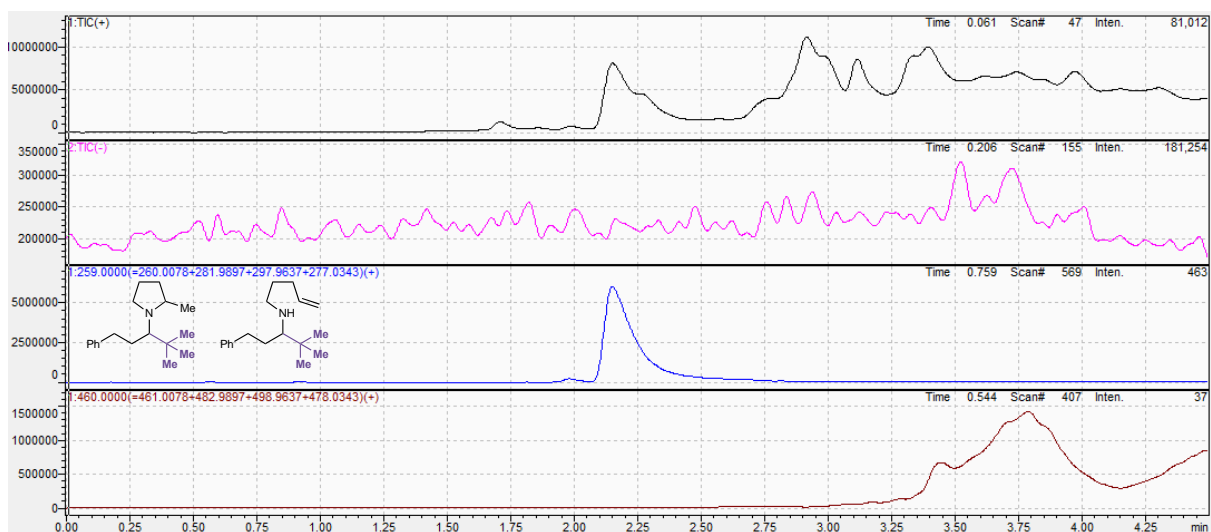



### 3° Aldehyde tethered alkene

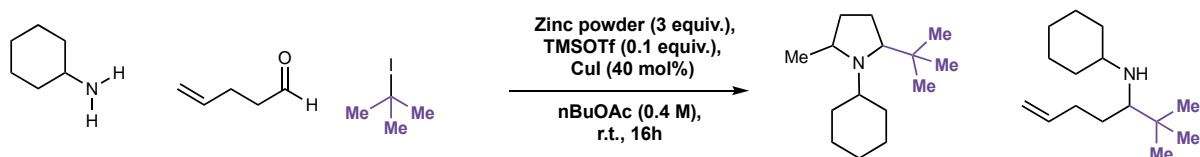

An oven dried vial (Biotage Microwave Process Vial (10 mL), equipped with gas-tight pierceable caps) was charged with a stirring bar, Zn dust (78 mg, 1.2 mmol, 3 equiv) and copper iodide (30 mg, 0.16 mmol, 40 mol%). The vial was sealed, evacuated and backfilled with N<sub>2</sub>. To this was added *n*BuOAc (1 mL), followed by cyclohexylamine (46  $\mu$ L, 0.4 mmol, 1.0 equiv) and 4-pentenal (79  $\mu$ L, 0.8 mmol, 2 equiv). The mixture was stirred for 15 minutes then, whilst stirring, tert-butyl iodide (143  $\mu$ L, 1.2 mmol, 3 equiv) was added. The reaction mixture was stirred overnight. The crude mixture was transferred into a 50 ml round bottom flask and diluted with dichloromethane (approximately 20 ml). NaOH (approximately 15 ml, 10% aq.) was added. The heterogenous mixture was vigorously stirred for 10-15 min. The aqueous layer was extracted with dichloromethane three times. The solvent was removed *in vacuo* and the reaction was analysed by <sup>1</sup>H NMR using 1,1,2,2-tetrachloroethane as an internal standard and LCMS analysis. LCMS analysis showed a wide variety of products. An extracted ion spectrum showed the presence of 1 major peak corresponding to the expected products. Additionally, another extracted ion spectrum showed trace peaks showing the presence of the addition of the cyclised alkene radical intermediate to another iminium.

*The <sup>1</sup>H NMR of the resulting reaction mixture using 1,1,2,2-tetrachloroethane as an internal standard*

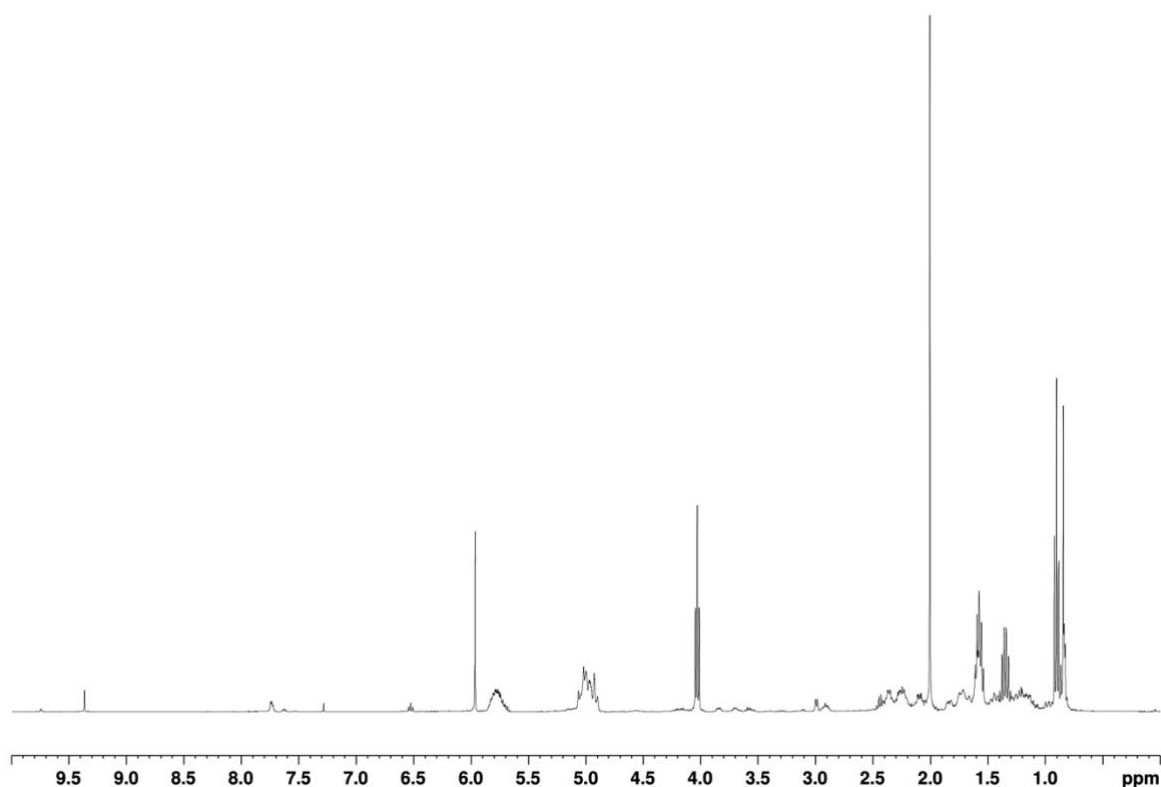

The LCMS TIC (+) and TIC (-) trace of the overall reaction mixture with extracted ion spectrums below

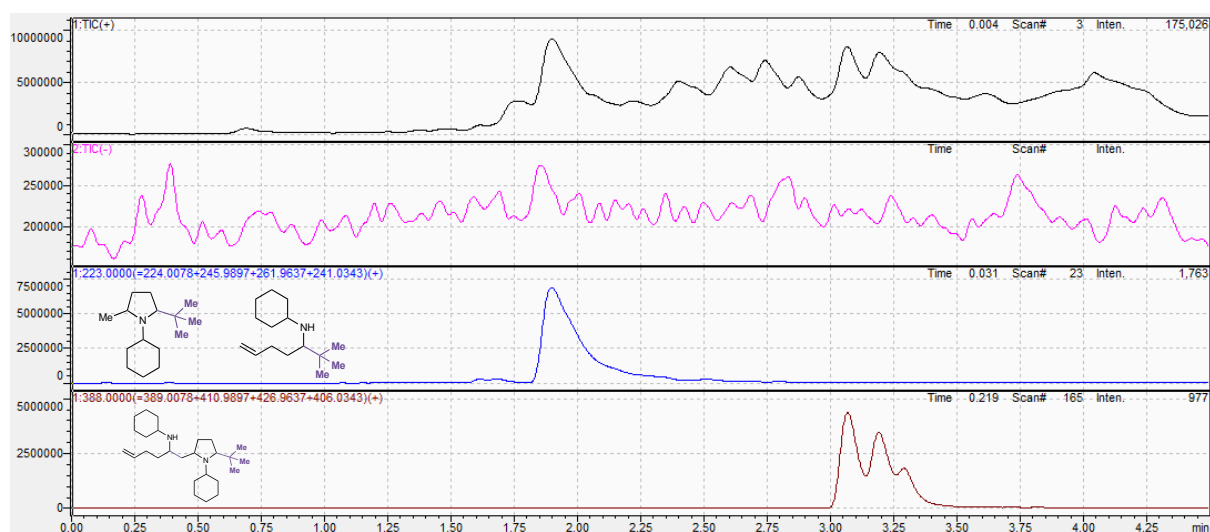

### RAE Amine tethered alkene

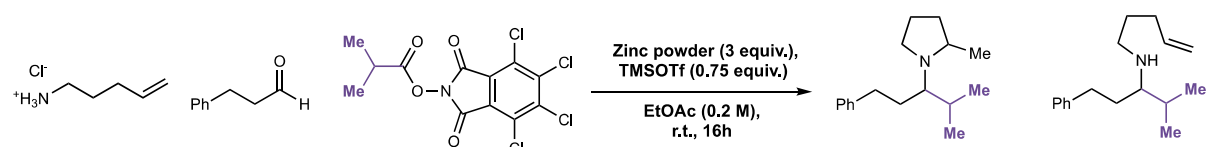

An oven dried vial (Biotage Microwave Process Vial 10 mL, equipped with gas-tight pierceable caps) was charged with a stirring bar and pent-4-en-1-amine hydrochloride (49 mg, 0.4 mmol, 1 equiv). The vial was sealed, evacuated and backfilled with N<sub>2</sub>. To this was added EtOAc (1 mL), followed hydrocinnamaldehyde (54 μL, 0.4 mmol, 2 equiv) and TMSOTf (27 μL, 0.15 mmol, 0.75 equiv). The mixture was stirred for 15 mins. The cap was removed. Zinc (39 mg, 0.6 mmol, 3 equiv) and the 4,5,6,7-tetrachloro-1,3-dioxoisindolin-2-yl isopropylcarboxylate (223 mg, 0.6 mmol, 3 equiv) were added in one portion. The microwave vial was sealed, put under vacuum and refilled with N<sub>2</sub>. The mixture was stirred overnight. The crude mixture was transferred into a 50 ml round bottom flask and diluted with dichloromethane (approximately 20 ml). NaOH (approximately 15 ml, 10% aq.) was added. The heterogenous mixture was vigorously stirred for 10-15 min. The aqueous layer was extracted with dichloromethane three times. The combined organic layer was dried over anhydrous MgSO<sub>4</sub>. The solvent was removed *in vacuo* and the reaction was analysed by <sup>1</sup>H NMR using 1,3,5-trimethoxybenzene as an internal standard and LCMS analysis. LCMS analysis showed a wide variety of products. An extracted ion spectrum showed the presence of 2 major overlapping peaks corresponding to the expected products. Additionally, another extracted ion spectrum showed trace peaks showing the presence of the addition of the cyclised alkene radical intermediate to another iminium.

The  $^1\text{H}$  NMR of the resulting reaction mixture using 1,3,5-trimethoxybenzene as an internal standard

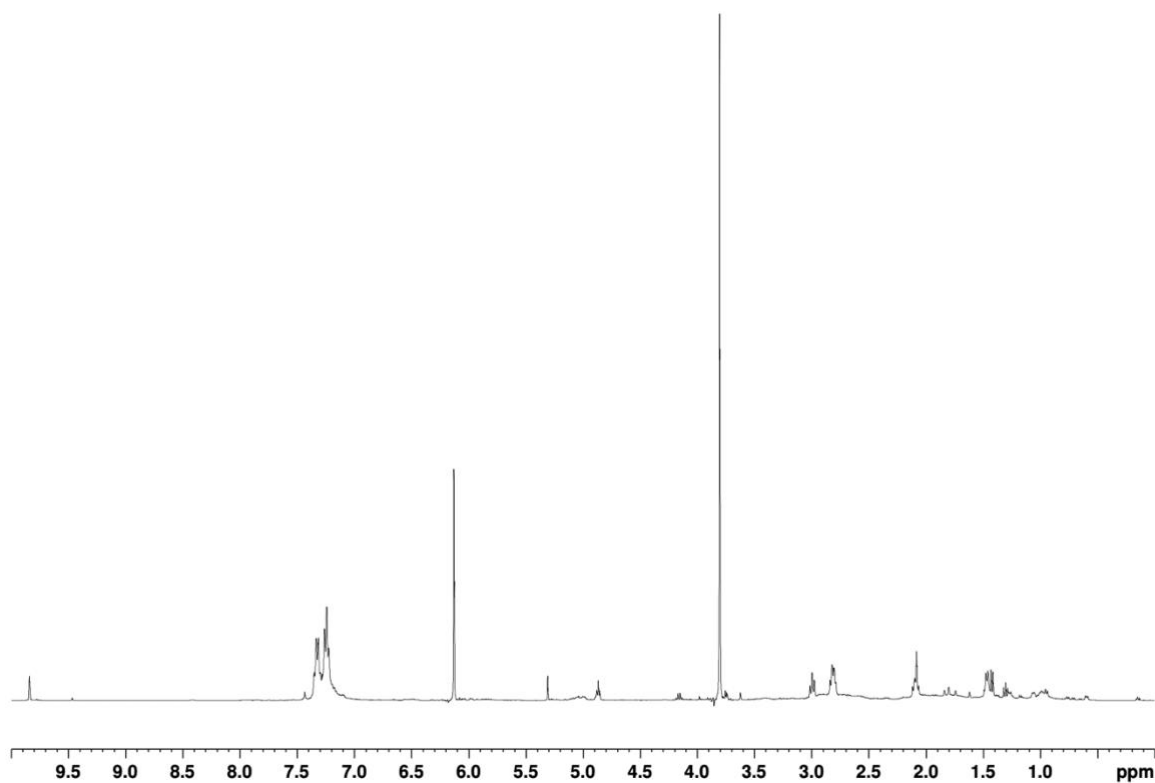

The LCMS TIC (+) and TIC (-) trace of the overall reaction mixture with extracted ion spectrums below

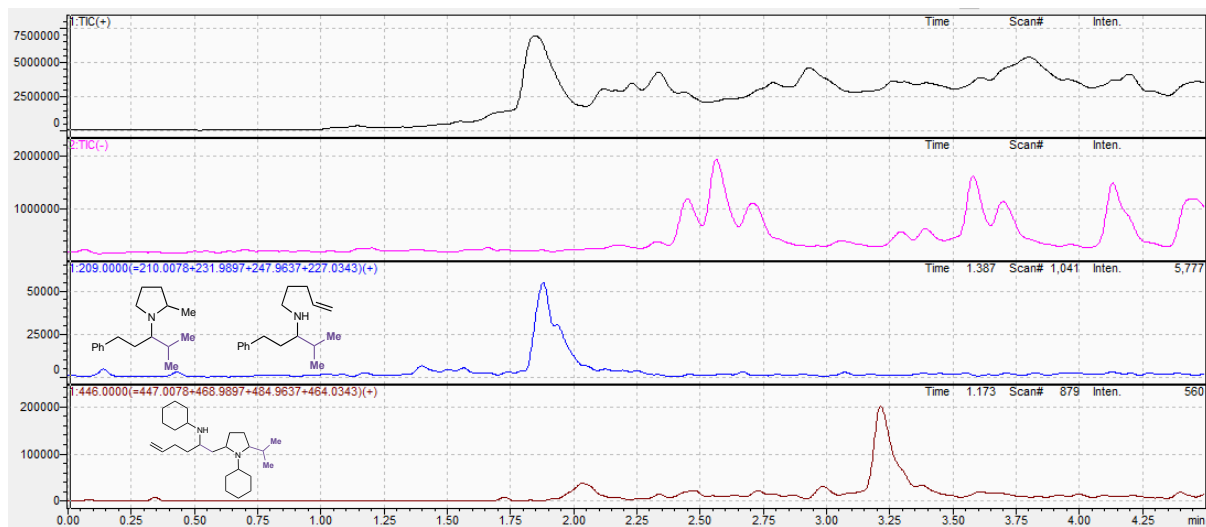

## RAE Aldehyde tethered alkene

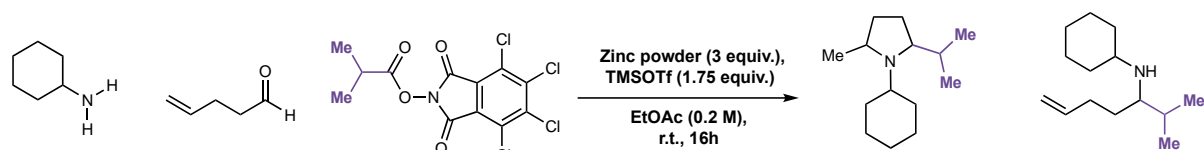

An oven dried vial (Biotage Microwave Process Vial 10 mL, equipped with gas-tight pierceable caps) was charged with a stirring bar. The vial was sealed, evacuated and backfilled with N<sub>2</sub>. To this was added EtOAc (1 mL), followed by cyclohexylamine (23  $\mu$ L, 0.2 mmol, 1.0 equiv) and 4-pentenal (40  $\mu$ L, 0.4 mmol, 2 equiv) and TMSOTf (63  $\mu$ L, 0.35 mmol, 1.75 equiv). The mixture was stirred for 15 mins. The cap was removed. Zinc (39 mg, 0.6 mmol, 3 equiv) and the 4,5,6,7-tetrachloro-1,3-dioxoisindolin-2-yl isopropylcarboxylate (223 mg, 0.6 mmol, 3 equiv) were added in one portion. The microwave vial was sealed, put under vacuum and refilled with N<sub>2</sub>. The mixture was stirred overnight. The crude mixture was transferred into a 50 ml round bottom flask and diluted with dichloromethane (approximately 20 ml). NaOH (approximately 15 ml, 10% aq.) was added. The heterogenous mixture was vigorously stirred for 10-15 min. The aqueous layer was extracted with dichloromethane three times. The combined organic layer was dried over anhydrous MgSO<sub>4</sub>. The solvent was removed *in vacuo* and the reaction was analysed by <sup>1</sup>H NMR using 1,3,5-trimethoxybenzene as an internal standard and LCMS analysis. LCMS analysis showed a wide variety of products. An extracted ion spectrum showed the presence of 1 major peak and 1 minor corresponding to the expected products. Additionally, another extracted ion spectrum showed trace peaks indicating traces of the addition of the cyclised alkene radical intermediate to another iminium.

*The <sup>1</sup>H NMR of the resulting reaction mixture using 1,3,5-trimethoxybenzene as an internal standard*

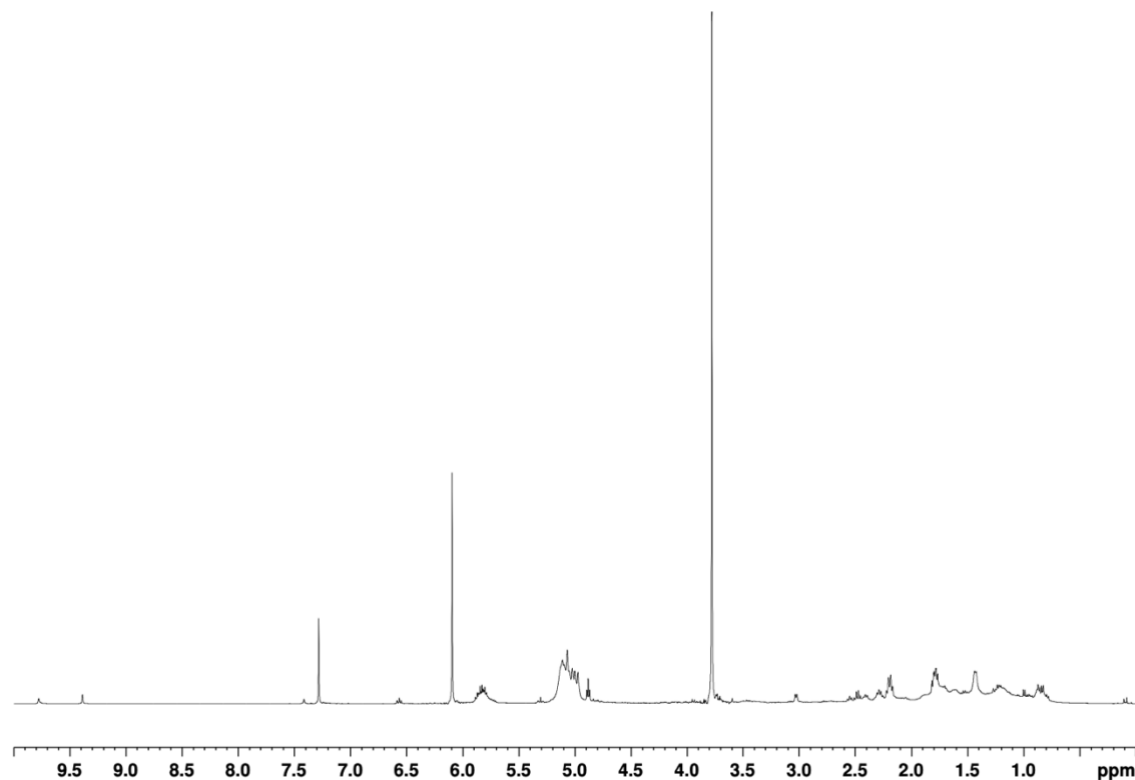

The LCMS TIC (+) and TIC (-) trace of the overall reaction mixture with extracted ion spectrums below

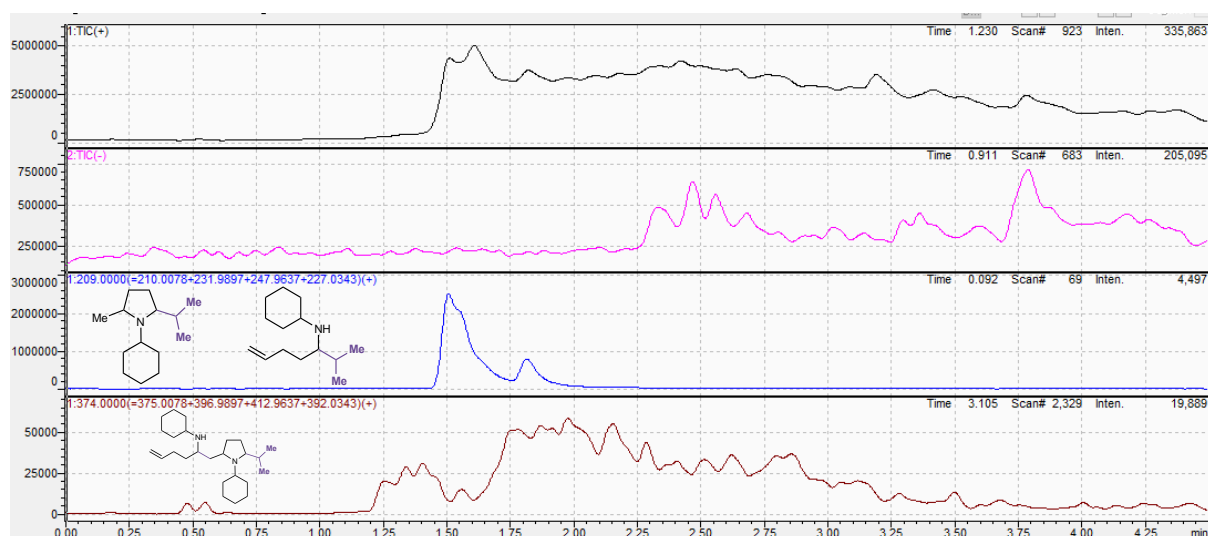

### Ketone Amine tethered alkene

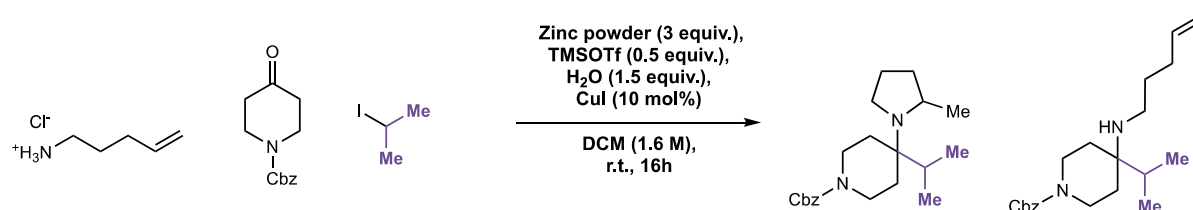

An oven dried vial (Biotage Microwave Process Vial 10 mL, equipped with gas-tight pierceable caps) was charged with a stirring bar, pent-4-en-1-amine hydrochloride (49 mg, 0.4 mmol, 1 equiv), benzyl 4-oxopiperidine-1-carboxylate (140 mg, 0.6 mmol, 1.5 equiv), Zn dust (79 mg, 1.2 mmol, 3 equiv) and copper iodide (7.5 mg, 0.04 mmol, 10 mol%). The vial was sealed, evacuated and backfilled with  $N_2$ . To this was added dichloromethane (0.25 mL). While stirring, 2-iodopropane (120  $\mu$ L, 1.2 mmol, 3 equiv),  $H_2O$  (11  $\mu$ L, 0.6 mmol, 1.5 equiv) and then TMSOTf (36  $\mu$ L, 0.2 mmol, 0.5 equiv) were added. The mixture was stirred overnight. The mixture was diluted with dichloromethane and basified with NaOH (10%, aq). The heterogenous mixture was stirred vigorously for 15 mins. The organic and aqueous layers were separated. The aqueous layer was extracted with dichloromethane twice. The combined organic layer was dried over anhydrous  $MgSO_4$ . The solvent was removed *in vacuo* and the reaction was analysed by  $^1H$  NMR using 1,1,2,2-tetrachloroethane as an internal standard and LCMS analysis.  $^1H$  NMR analysis showed a diverse mixture was present. LCMS analysis showed a wide variety of products. An extracted ion spectrum showed the presence of 2 major peaks corresponding to the expected products. Additionally, another extracted ion spectrum showed trace peaks showing the presence of the addition of the cyclised alkene radical intermediate to another iminium.

The  $^1\text{H}$  NMR of the resulting reaction mixture using 1,1,2,2-tetrachloroethane as an internal standard

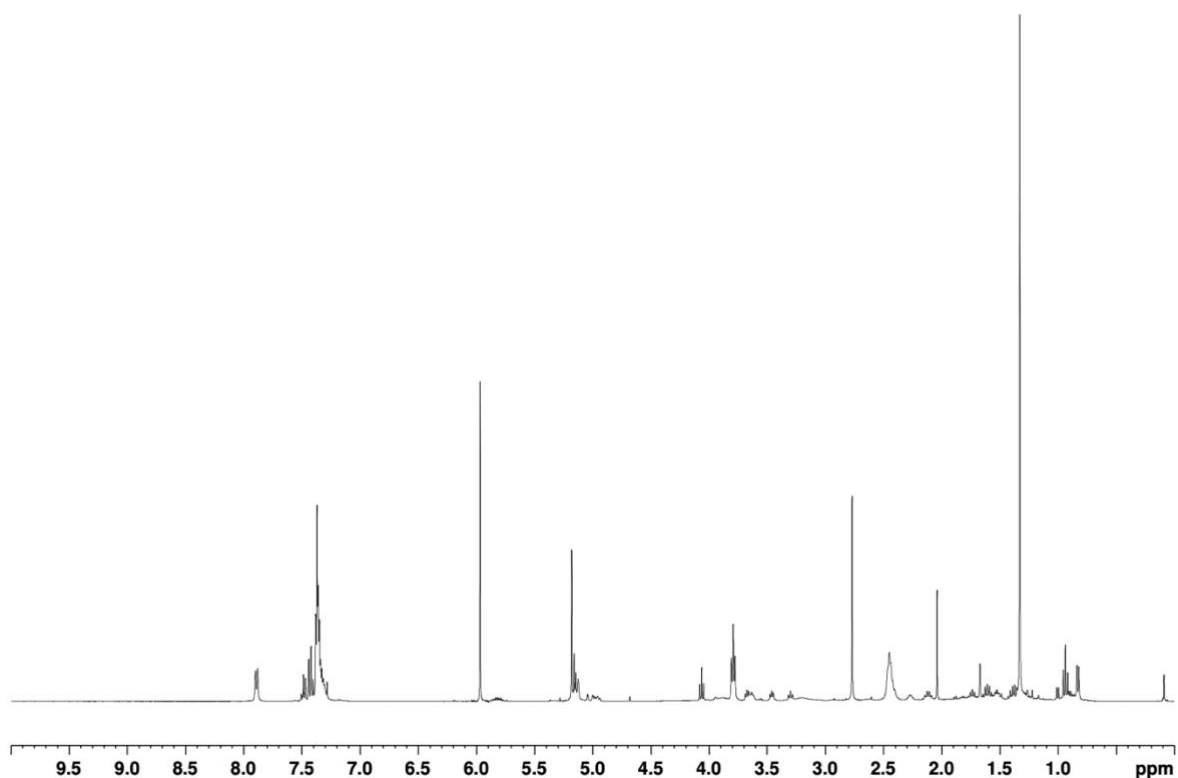

The LCMS TIC (+) and TIC (-) trace of the overall reaction mixture with extracted ion spectrums below

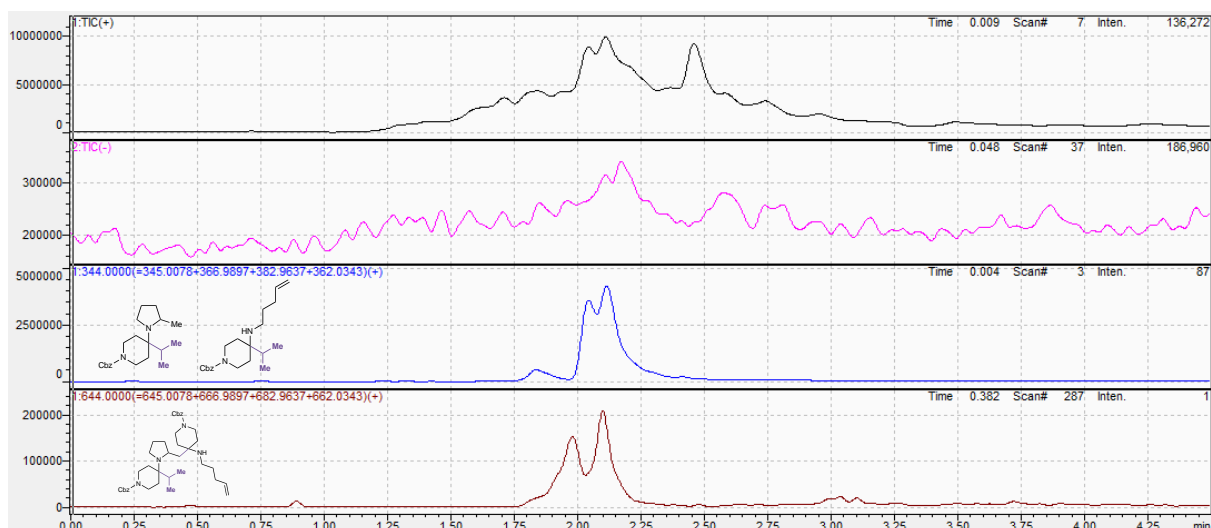

# 11. Additional Scope

## Amines

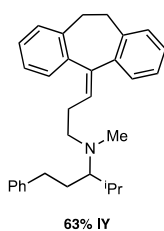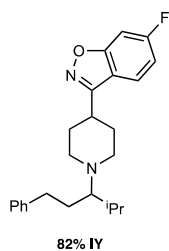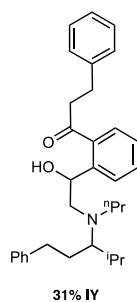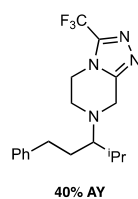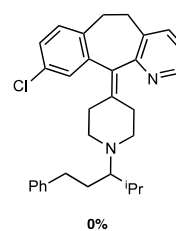

## Aldehydes

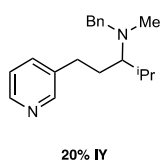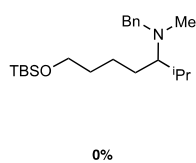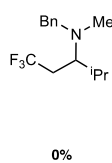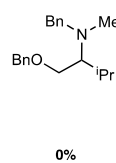

## Alkyl halides

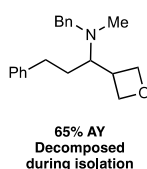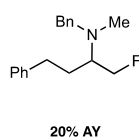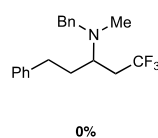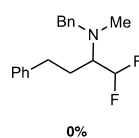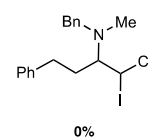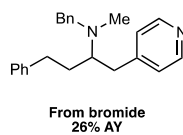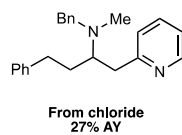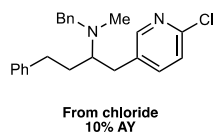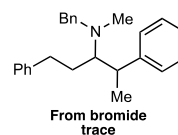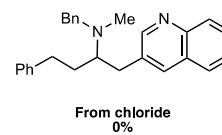

## Redox active esters

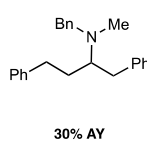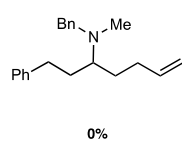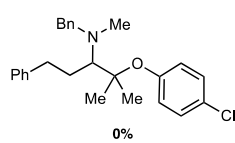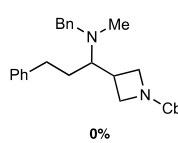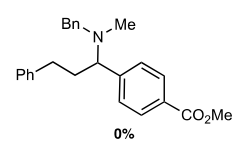

## CuI conditions

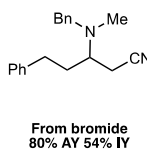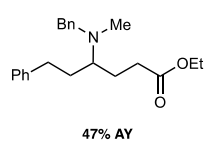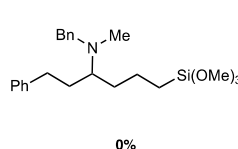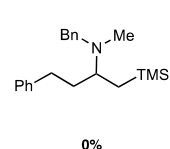

## $\alpha$ -Tertiary amines

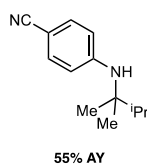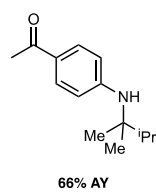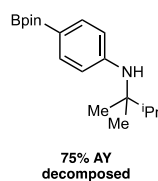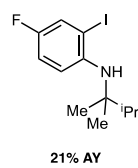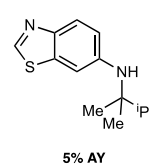

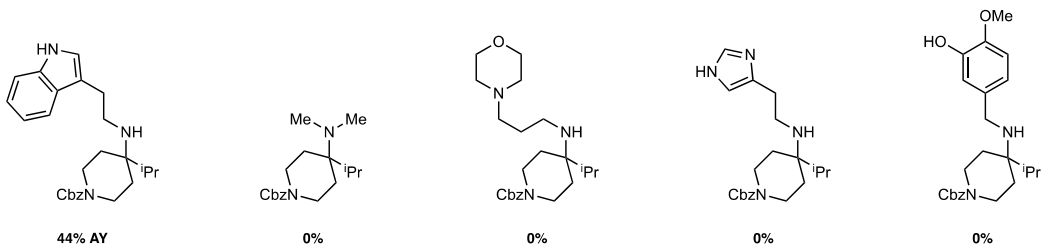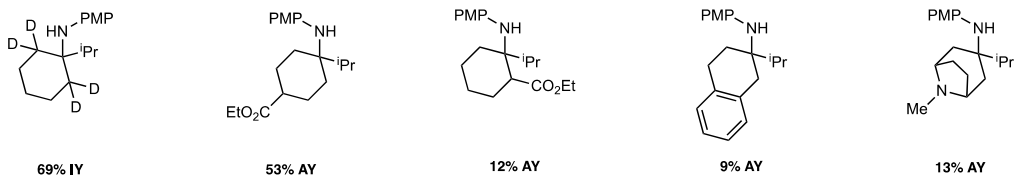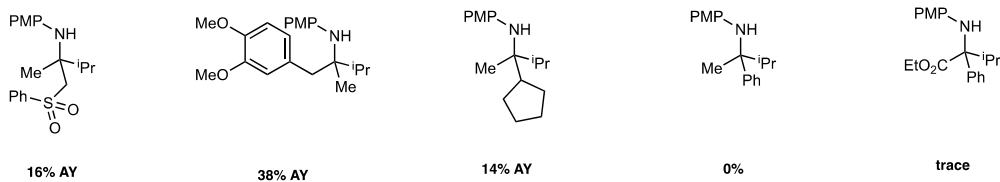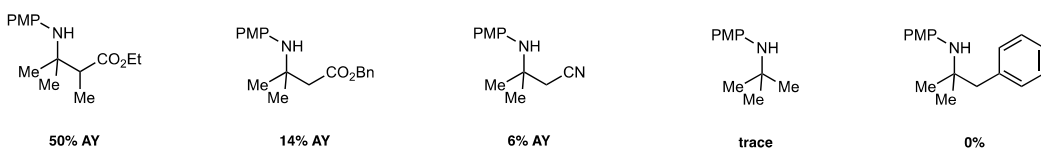

### Amino-oxetanes

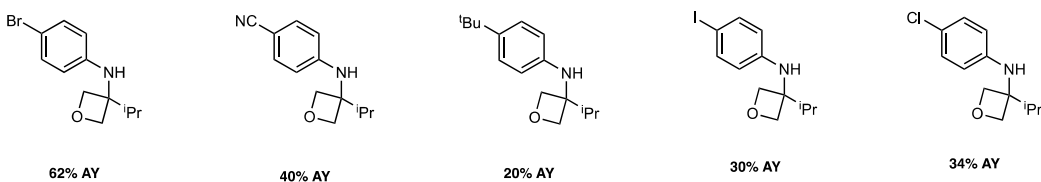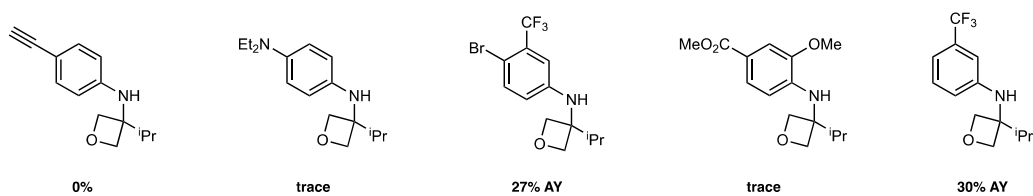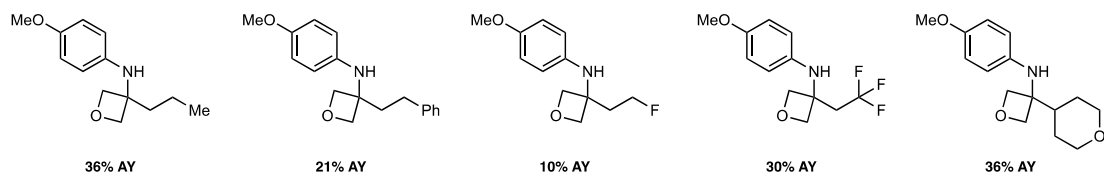



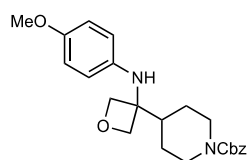

17% AY

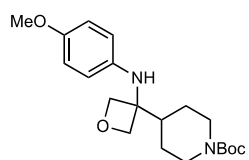

23% AY

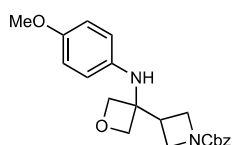

0%

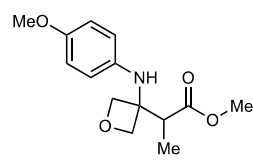

0%

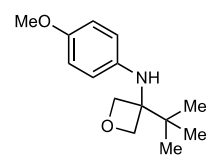

0%

## 12. References

1. Kumar, R.; Flodén, N. J.; Whitehurst, W. G.; Gaunt, M. J. A General Carbonyl Alkylative Amination for Tertiary Amine Synthesis. *Nature* **2020**, 581, 415–420.
2. Li, X.; Zhang, Y.-K.; Plattner, J. J.; Mao, W.; Alley, M. R. K.; Xia, Y.; Hernandez, V.; Zhou, Y.; Ding, C. Z.; Li, J.; Shao, Z.; Zhang, H.; Xu, M. Synthesis and Antibacterial Evaluation of a Novel Tricyclic Oxaborole-Fused Fluoroquinolone. *Bioorganic & Medicinal Chemistry Letters* **2013**, 23, 963–966.
3. Wulkesch, C.; Czekelius, C. Straightforward Synthesis of Fluorinated Enals via Photocatalytic  $\alpha$ -Perfluoroalkenylation of Aldehydes. *J. Org. Chem.* **2021**, 86, 7425–7438.
4. Bezagu, M.; Errico, C.; Chaulot-Talmon, V.; Monti, F.; Tanter, M.; Tabeling, P.; Cossy, J.; Arseniyadis, S.; Couture, O. High Spatiotemporal Control of Spontaneous Reactions Using Ultrasound-Triggered Composite Droplets. *J. Am. Chem. Soc.* **2014**, 136, 7205–7208.
5. Mujahid, M.; Korpe, G. V.; Deshmukh, S. P.; Bhadange, S. G.; Muthukrishnan, M. An Alternative Synthesis of the CNS Stimulant Prolintane. *Arkivoc* 2019, **2019** (5), 292–297.
6. Garivet, G.; Hofer, W.; Konitsiotis, A.; Klein, C.; Kaiser, N.; Mejuch, T.; Fansa, E.; Alsaabi, R.; Wittinghofer, A.; Bastiaens, P. I. H.; Waldmann, H. Small-Molecule Inhibition of the UNC-Src Interaction Impairs Dynamic Src Localization in Cells. *Cell Chemical Biology* **2019**, 26, 842–851.e7.
7. Hsiao, Y.-T.; Beadle, J.; Pascoe, C.; Annadate, R.; Vederas, J. C. Decarboxylative Radical Addition to Methylideneoxazolidinones for Stereocontrolled Synthesis of Selectively Protected Diamino Diacids. *Org. Lett.* **2021**, 23, 7270–7273.
8. Qin, T.; Cornella, J.; Li, C.; Malins, L. R.; Edwards, J. T.; Kawamura, S.; Maxwell, B. D.; Eastgate, M. D.; Baran, P. S. A General Alkyl-Alkyl Cross-Coupling Enabled by Redox-Active Esters and Alkylzinc Reagents. *Science* **2016**, 352 (6287), 801–805.
9. Ni, S.; Garrido-Castro, A. F.; Merchant, R. R.; de Gruyter, J. N.; Schmitt, D. C.; Mousseau, J. J.; Gallego, G. M.; Yang, S.; Collins, M. R.; Qiao, J. X.; Yeung, K.-S.; Langley, D. R.; Poss, M. A.; Scola, P. M.; Qin, T.; Baran, P. S. A General Amino Acid Synthesis Enabled by Innate Radical Cross-Coupling. *Angew. Chem. Int. Ed.* **2018**, 57 (44), 14560–14565.
10. Zhang, Y.; Zhang, D. Cu-Photoredox-Catalyzed C(Sp)–C(Sp<sup>3</sup>) Coupling of Redox-Active Esters with Terminal Alkynes. *Org. Biomol. Chem.* **2020**, 18, 4479–4483.
11. Chen, T.; Zhang, H.; Mykhailiuk, P. K.; Merchant, R. R.; Smith, C. A.; Qin, T.; Baran, P. S. Quaternary Centers by Nickel-Catalyzed Cross-Coupling of Tertiary Carboxylic Acids and (Hetero)Aryl Zinc Reagents. *Angew. Chem. Int. Ed.* **2019**, 58, 2454–2458.
12. Bosque, I.; Bach, T. 3-Acetoxyquinuclidine as Catalyst in Electron Donor–Acceptor Complex-Mediated Reactions Triggered by Visible Light. *ACS Catal.* **2019**, 9, 9103–9109.
13. Zhang, Z.; Górski, B.; Leonori, D. Merging Halogen-Atom Transfer (XAT) and Copper Catalysis for the Modular Suzuki–Miyaura-Type Cross-Coupling of Alkyl Iodides and Organoborons. *J. Am. Chem. Soc.* **2022**, 144, 1986–1992.
14. Pinaud, M.; Le Gall, E.; Pisset, M. Mixed Aliphatic Organozinc Reagents as Nonstabilized C sp<sup>3</sup>-Nucleophiles in the Multicomponent Mannich Reaction. *J. Org. Chem.* **2022**, 87, 4961–4964.
15. Levin, V. V.; Zemtsov, A. A.; Struchkova, M. I.; Dilman, A. D. Reactions of Difluorocarbene with Organozinc Reagents. *Org. Lett.* **2013**, 15, 917–919.

16. Krasovskiy, A.; Knochel, P. Convenient Titration Method for Organometallic Zinc, Magnesium, and Lanthanide- Reagents. *Synthesis* 2006, **2006** (5), 890–891.
17. Vogler, T.; Studer, A. Applications of TEMPO in Synthesis. *Synthesis* 2008, **2008** (13), 1979–1993.
18. Nagashima, T.; Curran, D. P. Reactions of Tempo with Alkylsamarium and Other Organometallic Reagents. *Synlett* 1996, **1996** (4), 330–332.
19. Mancheño, O. G.; Stopka, T. TEMPO Derivatives as Alternative Mild Oxidants in Carbon–Carbon Coupling Reactions. *Synthesis* **2013**, 45, 1602–1611.
20. Budny-Godlewski, K.; Kubicki, D.; Justyniak, I.; Lewiński, J. A New Look at the Reactivity of TEMPO toward Diethylzinc. *Organometallics* **2014**, 33 (19), 5093–5096.
21. Nakamura, T.; Busfield, W. K.; Jenkins, I. D.; Rizzardo, E.; Thang, S. H.; Suyama, S. Reaction of Tert -Alkoxy and Alkyl Radicals with Styrene Studied by the Nitroxide Radical-Trapping Technique. *J. Org. Chem.* **1997**, 62, 5578–5582.
22. Moad, G.; Rizzardo, E.; Solomon, D. H. Selectivity of the Reaction of Free Radicals with Styrene. *Macromolecules* **1982**, 15, 909–914.
23. Citterio, A.; Arnoldi, A.; Minisci, F. Nucleophilic Character of Alkyl Radicals. 18. Absolute Rate Constants for the Addition of Primary Alkyl Radicals to Conjugated Olefins and 1,4-Benzoquinone. *J. Org. Chem.* **1979**, 44, 2674–2682.
24. Examples of styrene and 1,1-diphenylethylene being used as traps for alkyl radicals: a) Xie, J.; Li, J.; Weingand, V.; Rudolph, M.; Hashmi, A. S. K. Intermolecular Photocatalyzed Heck-like Coupling of Unactivated Alkyl Bromides by a Dinuclear Gold Complex. *Chem. Eur. J.* **2016**, 22, 12646–12650. b) Chen, C.; Wang, Z.-J.; Lu, H.; Zhao, Y.; Shi, Z. Generation of Non-Stabilized Alkyl Radicals from Thianthrenium Salts for C–B and C–C Bond Formation. *Nat Commun* **2021**, 12, 4526. c) Ding, H.; Orazov, M. Anodically-Generated Alkyl Radicals Derived from Carboxylic Acids as Reactive Intermediates for Addition to Alkenes. *ChemElectroChem* **2023**, 10, e202201099.
25. a) Grimm, M. L.; Suleman, N. K.; Hancock, A. N.; Spencer, J. N.; Dudding, T.; Rowshanpour, R.; Castagnoli, N.; Tanko, J. M. Stereoelectronic and Resonance Effects on the Rate of Ring Opening of N -Cyclopropyl-Based Single Electron Transfer Probes. *J. Am. Chem. Soc.* **2020**, 142, 2640–2652. b) Nonhebel, D. C. The Chemistry of Cyclopropylmethyl and Related Radicals. *Chem. Soc. Rev.* **1993**, 22, 347. c) Gladkov, A. A.; Levin, V. V.; Dilman, A. D. Photoredox Promoted Barbier-Type Reaction of Alkyl Iodides with N -Alkyl and N -Aryl Imines. *J. Org. Chem.* **2023**, 88, 1260–1269.
26. a) Heinz, C.; Lutz, J. P.; Simmons, E. M.; Miller, M. M.; Ewing, W. R.; Doyle, A. G. Ni-Catalyzed Carbon–Carbon Bond-Forming Reductive Amination. *J. Am. Chem. Soc.* **2018**, 140, 2292–2300. b) Pratley, C.; Fenner, S.; Murphy, J. A. Nitrogen-Centered Radicals in Functionalization of Sp<sup>2</sup> Systems: Generation, Reactivity, and Applications in Synthesis. *Chem. Rev.* **2022**, 122 (9), 8181–8260. c) Newcomb, Ma.; Burchill, M. T.; Deeb, T. M. A Mechanistic Probe Study of Potential Electron-Transfer Reactions of Lithium Dialkylamides. *J. Am. Chem. Soc.* **1988**, 110, 6528–6535.
27. a) Jackman, M. M.; Cai, Y.; Castle, S. L. Recent Advances in Iminyl Radical Cyclizations. *Synthesis* **2017**, 49, 1785–1795. b) Morris, S. A.; Wang, J.; Zheng, N. The Prowess of Photogenerated Amine Radical Cations in Cascade Reactions: From Carbocycles to Heterocycles. *Acc. Chem. Res.* **2016**, 49, 1957–1968. c) Newcomb, M.; Deeb, T. M.; Marquardt, D. J. N-Hydroxypyridine-2-Thione Carbamates. IV. A Comparison of 5-Exo Cyclizations of an Aminyl Radical and an Aminium Cation Radical. *Tetrahedron* **1990**, 46, 2317–2328. d) Probing the Diastereoselectivity in the Cyclization of Cationic Aminyl Radicals. *Tetrahedron: Asymmetry* **1999**, 10, 4091–4094. e)

Schmittel, M.; Burghart, A. Understanding Reactivity Patterns of Radical Cations. *Angew. Chem. Int. Ed. Engl.* **1997**, 36, 2550–2589. f) Newcomb, M.; Esker, J. L. Facile Production and Cyclizations of Amidyl Radicals. *Tet. Lett.* **1991**, 32, 1035–1038. g) Newcomb, M.; Marquardt, D. J.; Deeb, T. M. N-Hydroxypyridine-2-Thione Carbamates. v. Syntheses of Alkaloid Skeletons by Aminium Cation Radical Cyclizations. *Tetrahedron* **1990**, 46, 2329–2344. h) Horner, J. H.; Martinez, F. N.; Musa, O. M.; Newcomb, M.; Shahin, H. E. Kinetics of Dialkylaminium Cation Radical Reactions: Radical Clocks, Solvent Effects, Acidity Constants, and Rate Constants for Reactions with Hydrogen Atom Donors. *J. Am. Chem. Soc.* **1995**, 117, 11124–11133. i) Wagner, B. D.; Ruel, G.; Lusztyk, J. Absolute Kinetics of Aminium Radical Reactions with Olefins in Acetonitrile Solution 1. *J. Am. Chem. Soc.* **1996**, 118, 13–19.

# **$^1\text{H}$ and $^{13}\text{C}$ Spectral Data**

ethyl N-benzyl-N-butylglycinate (5a)

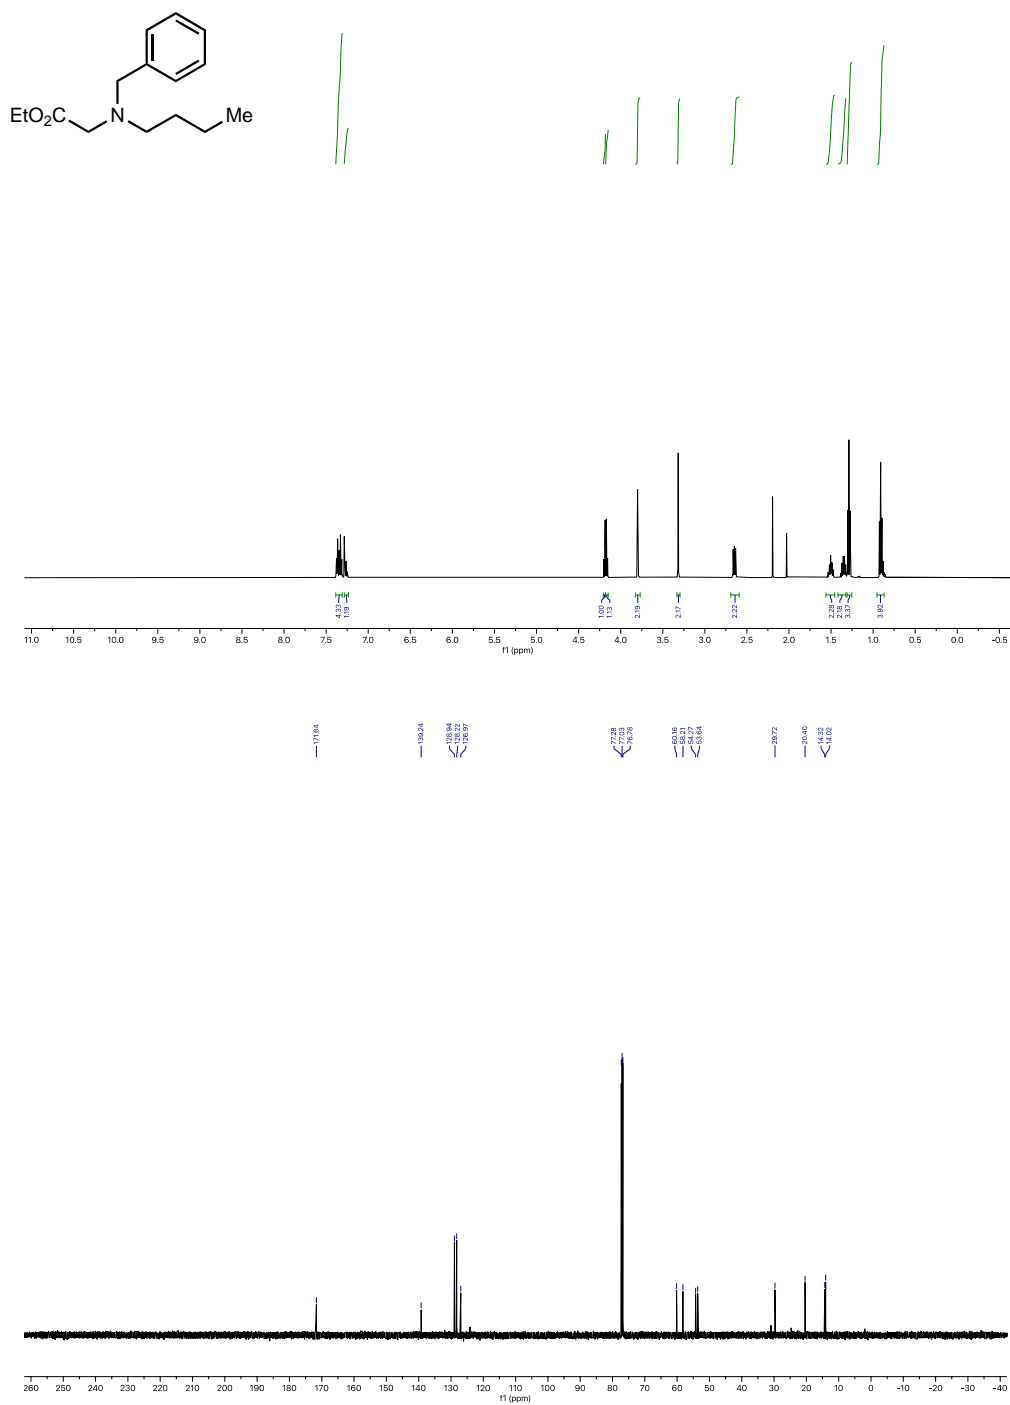

**(3-(benzyl(butyl)amino)propanenitrile) (5b)**

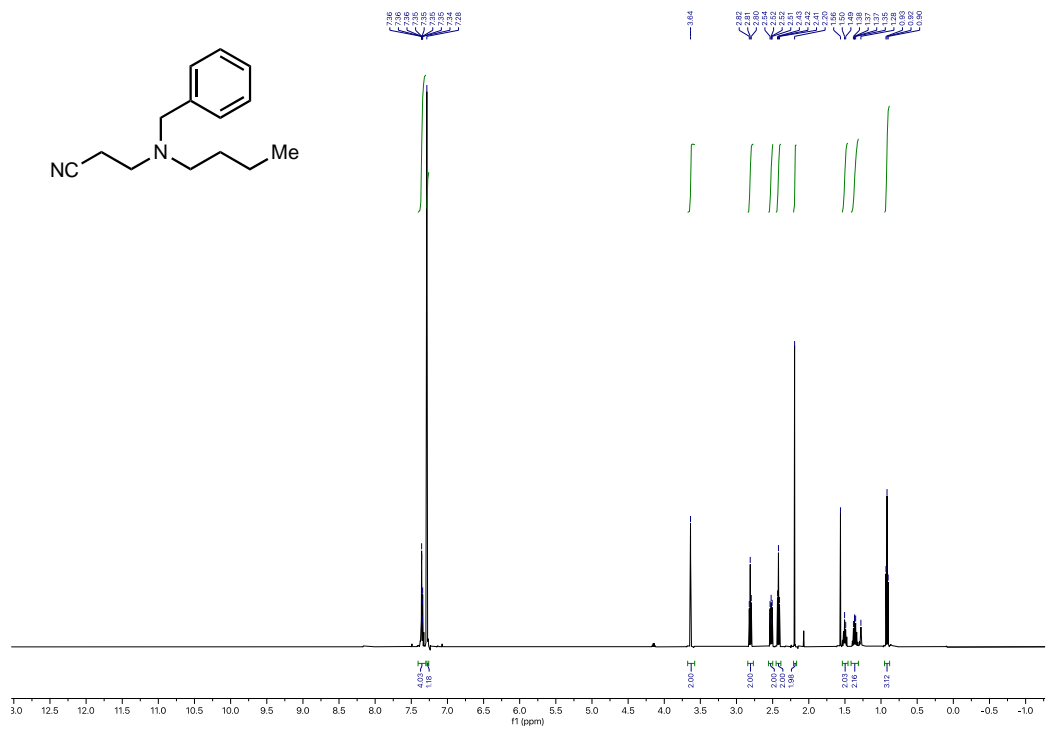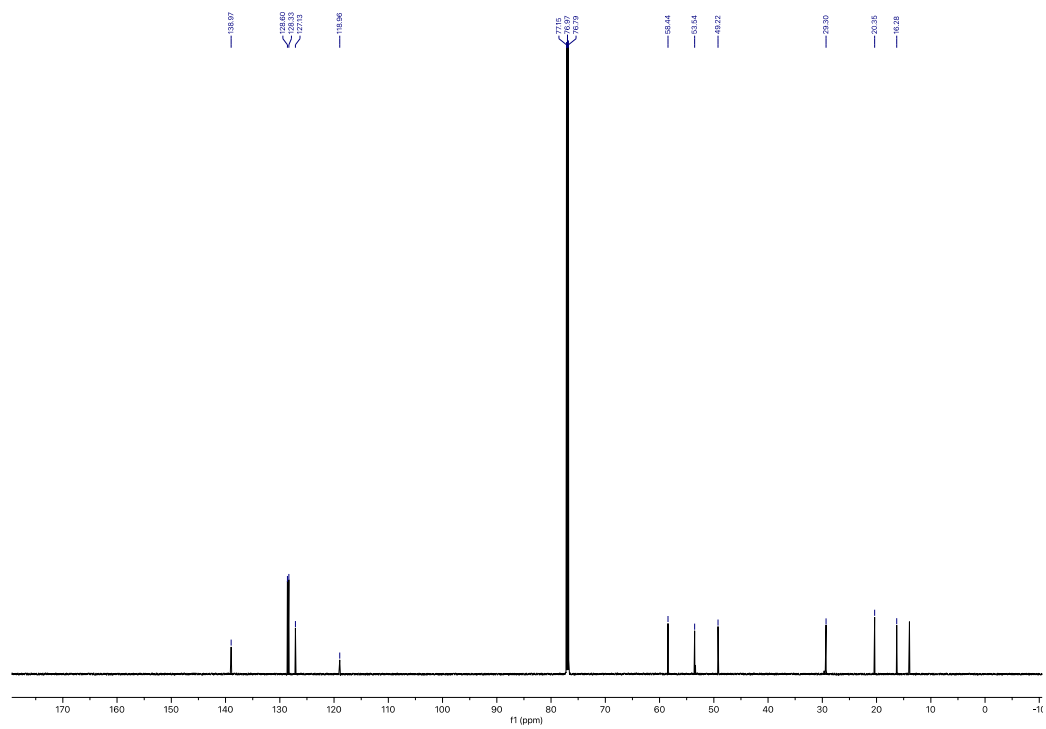

# N,N, 4-trimethyl-1-phenylpentan-3-amine (4d)

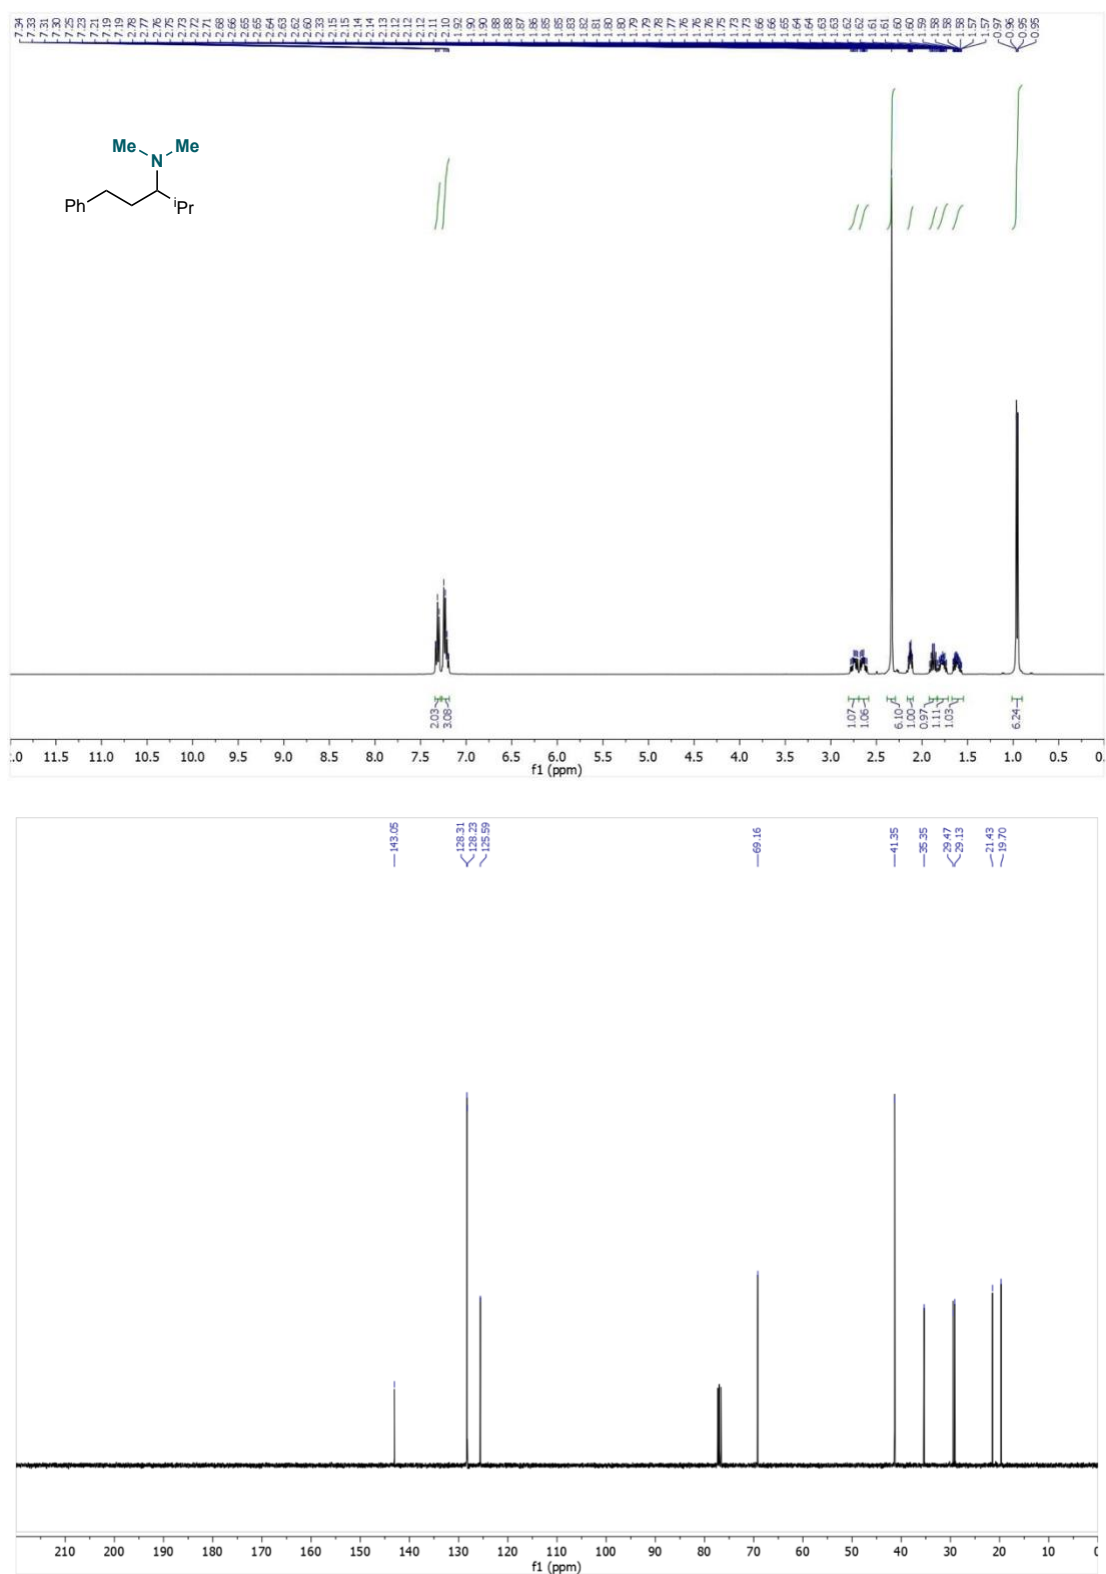



# N,N-Dibenzyl-4-methyl-1-phenylpentan-3-amine (4e)

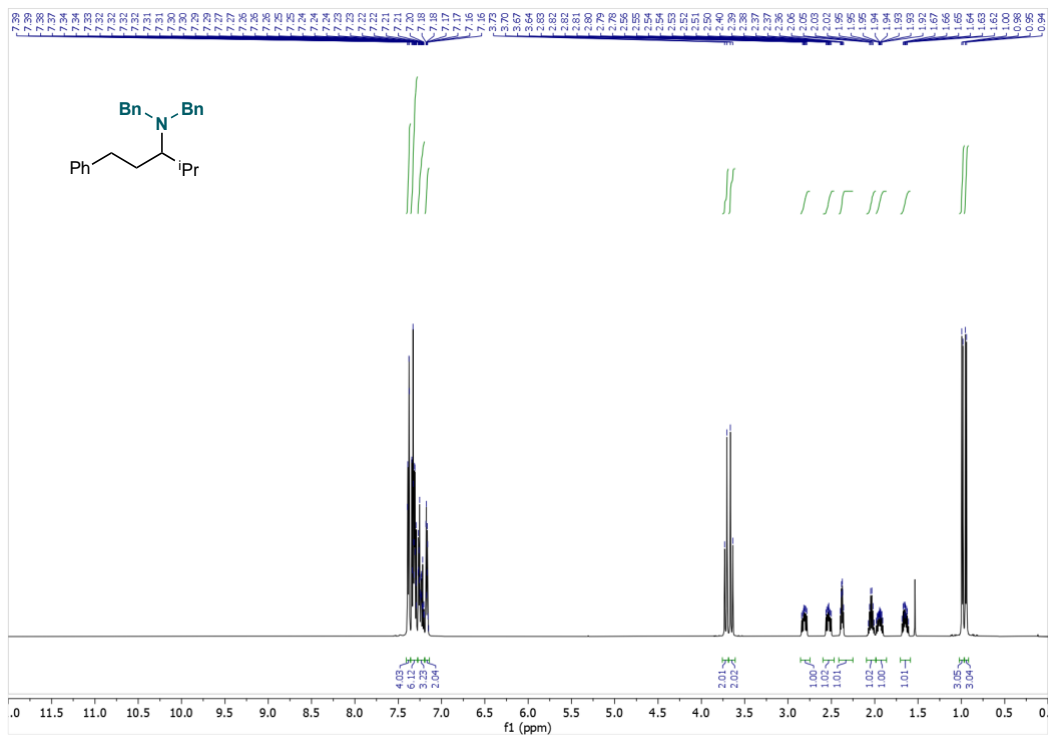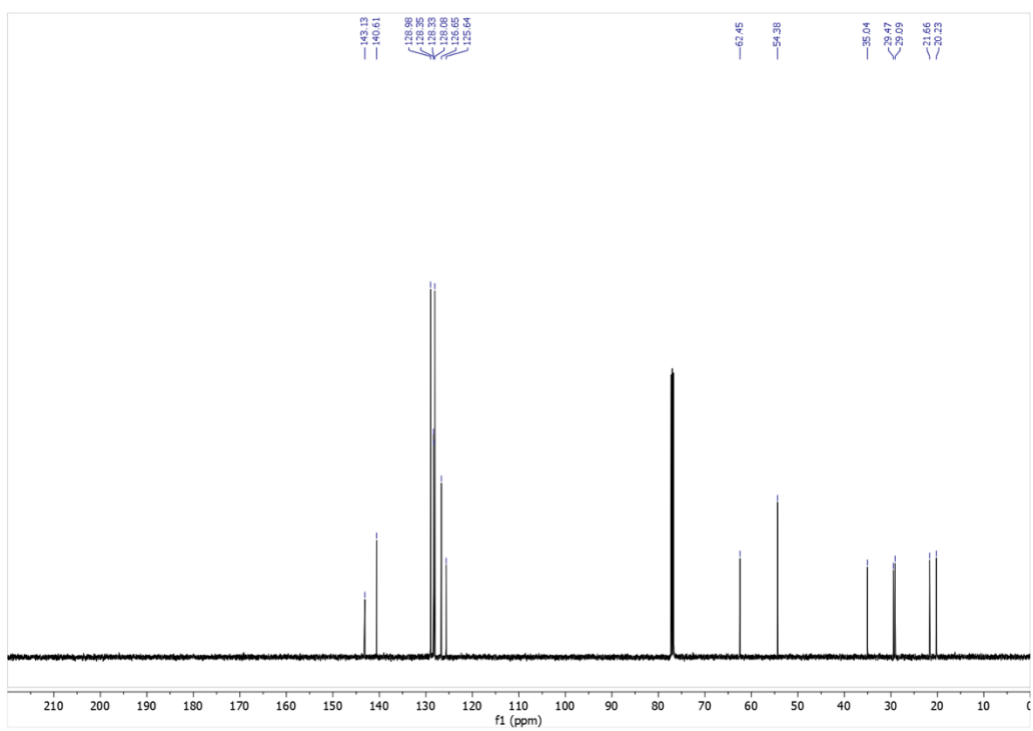



**N-benzyl-N-(3,4-dimethoxyphenethyl)-4-methyl-1-phenylpentan-3-amine (4g)**

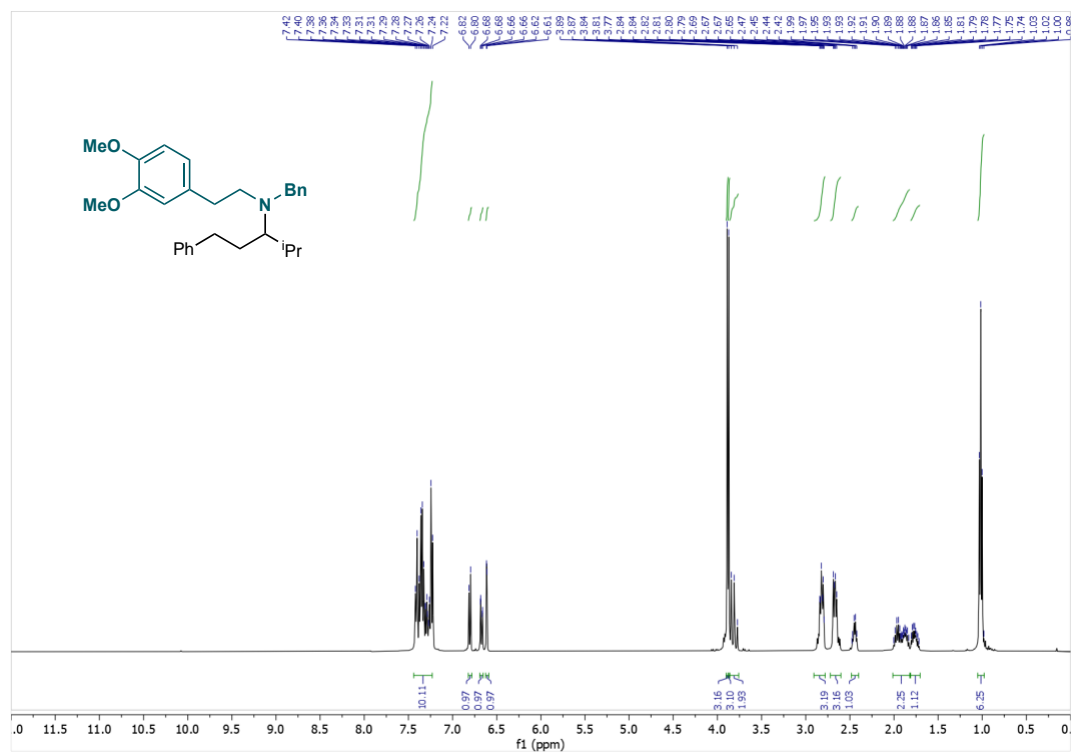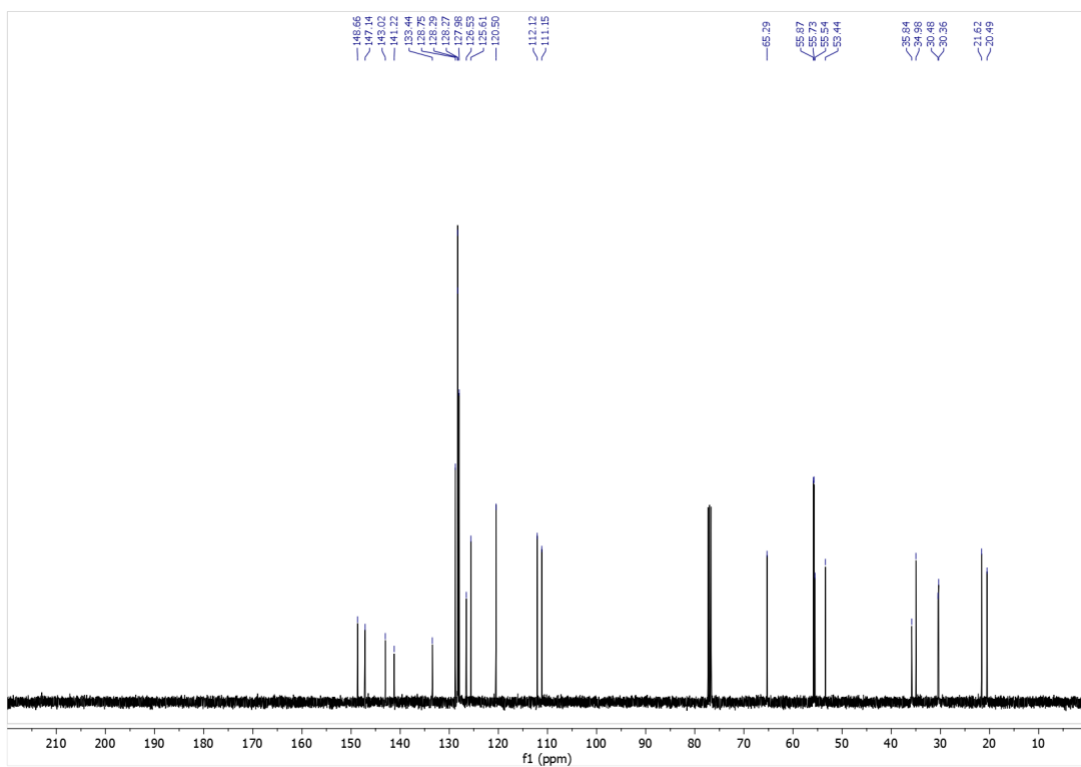

# 1-(4-Methyl-1-phenylpentan-3-yl)azetidide (4h)

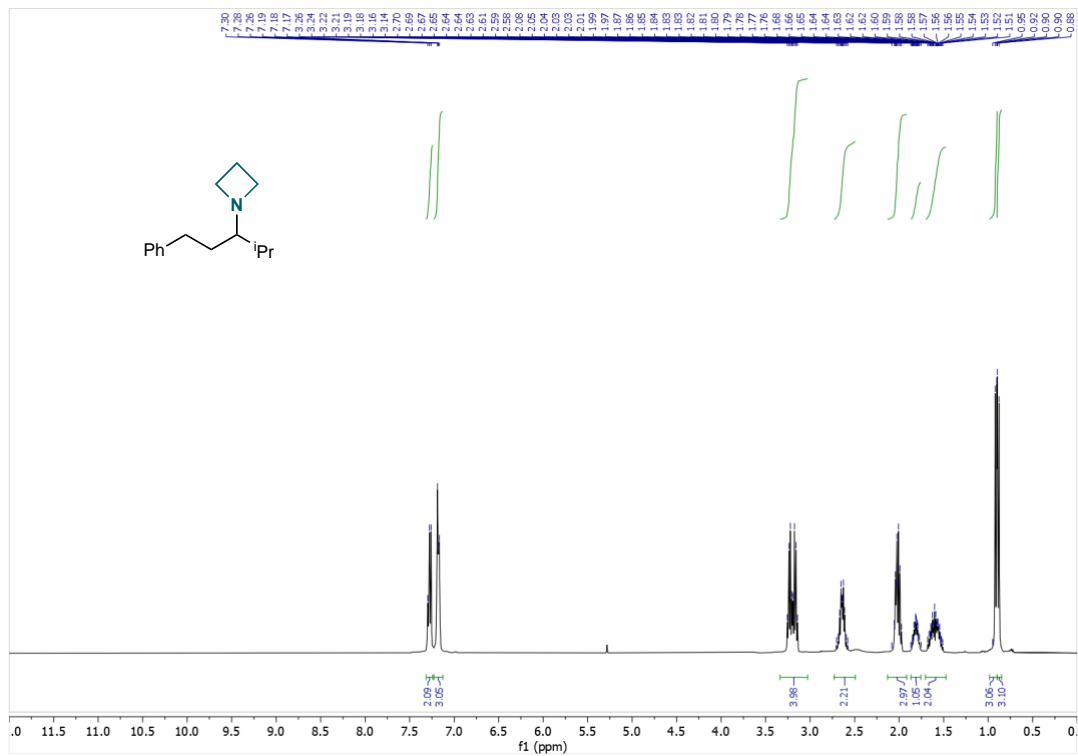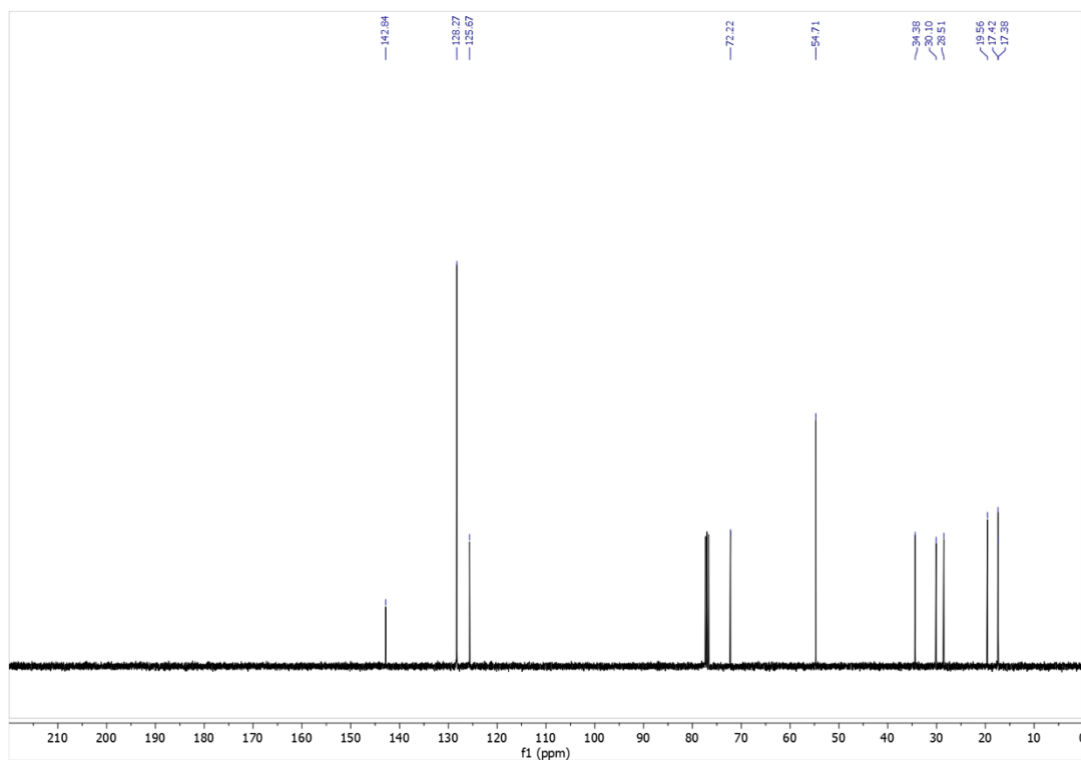

### 3-Methoxy-1-(4-methyl-1-phenylpentan-3-yl)azetidine (4i)

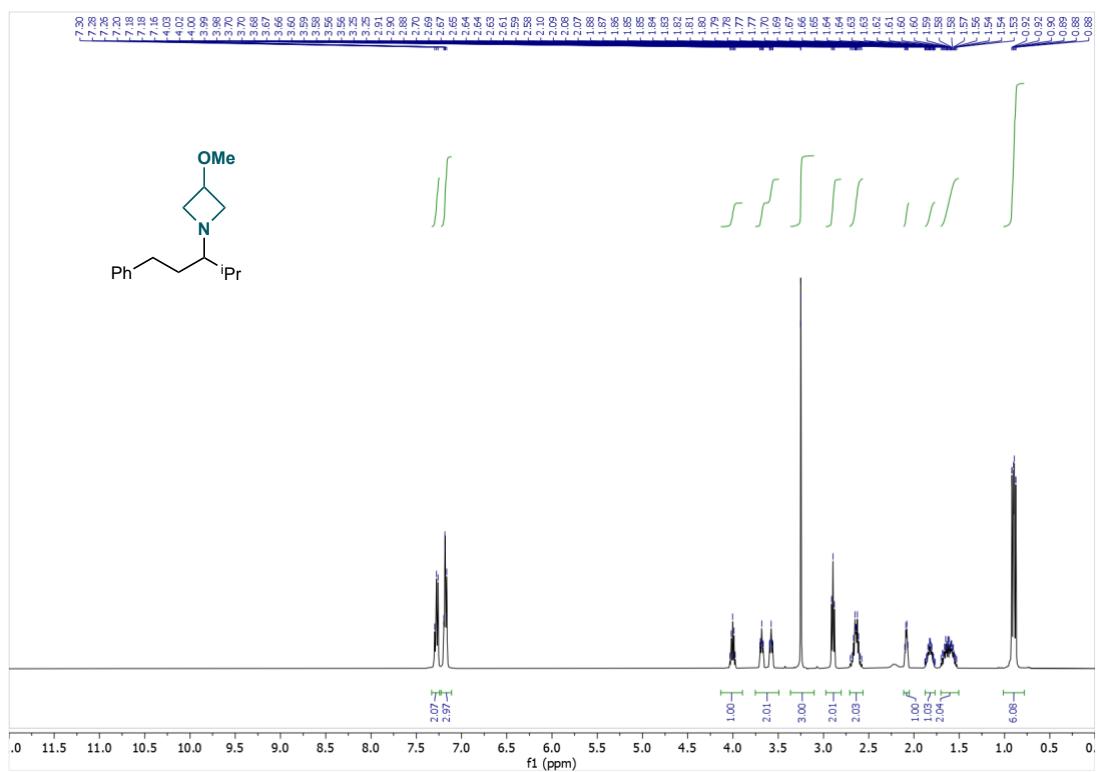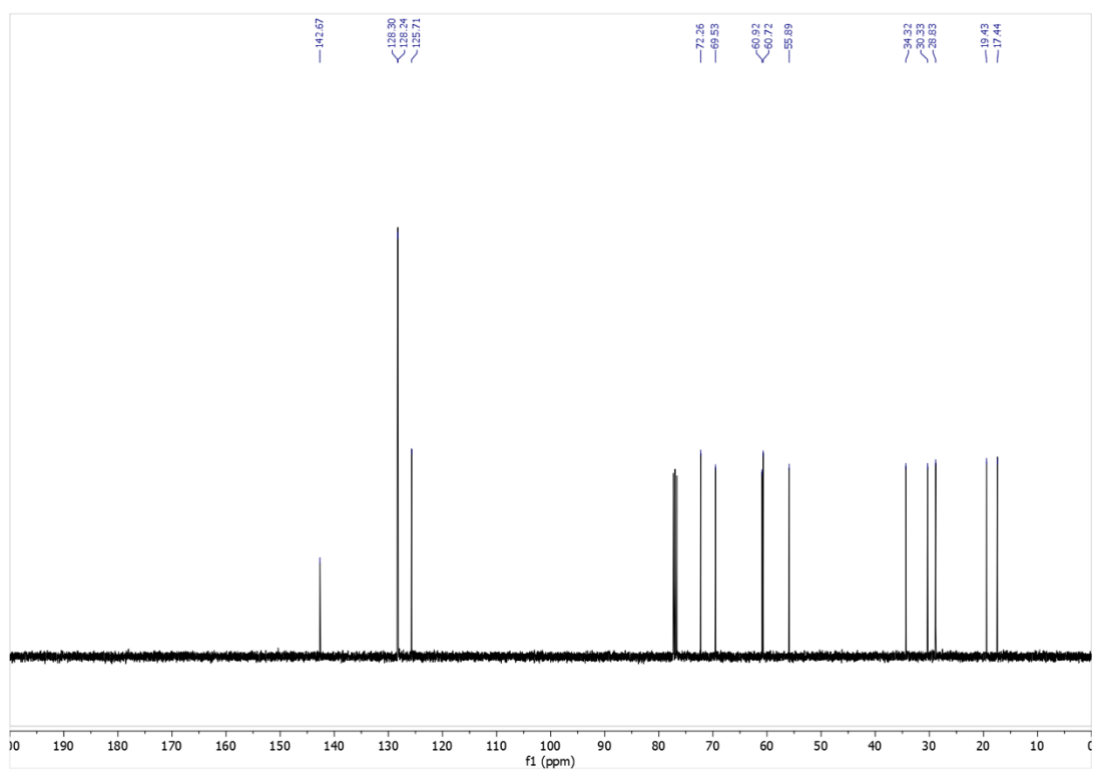

**4-Bromo-1-(4-methyl-1-phenylpentan-3-yl)piperidine (4l)**

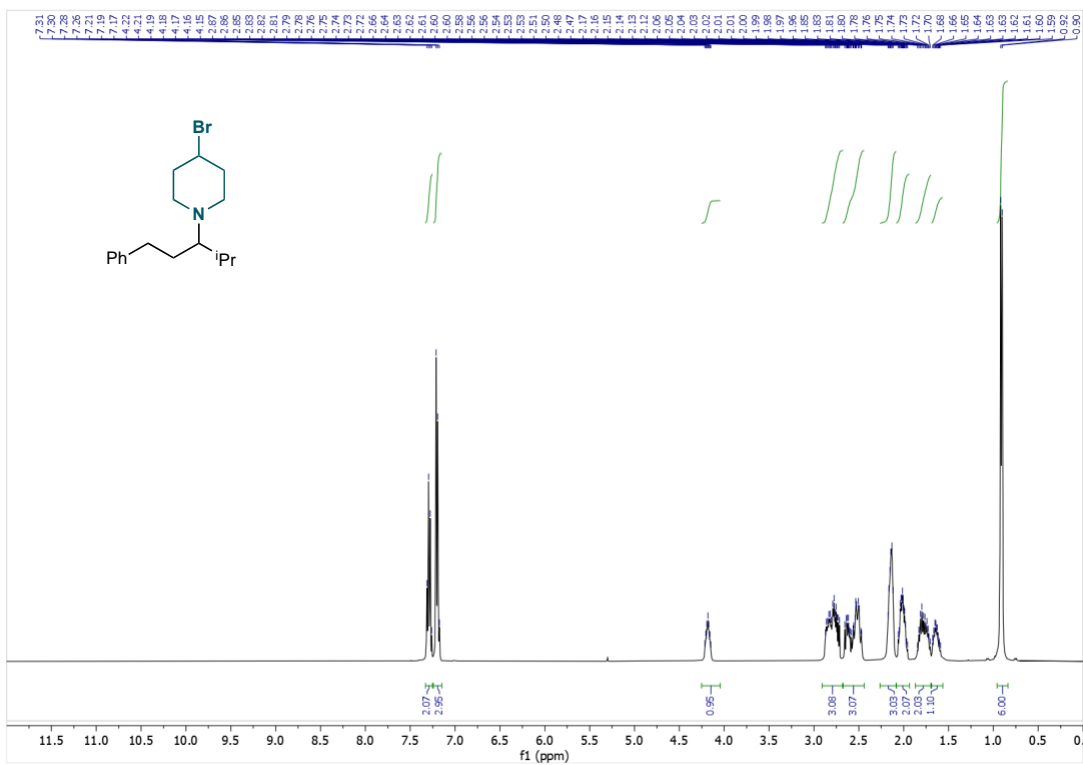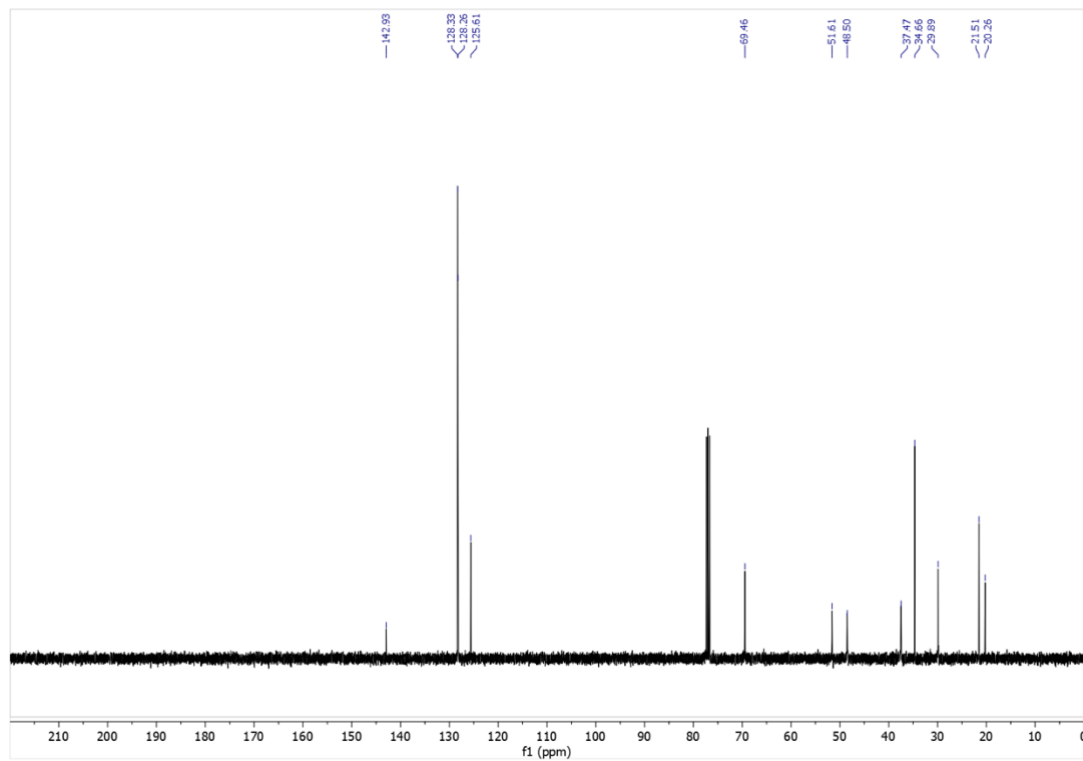

**4-(4-Chlorophenyl)-1-(4-methyl-1-phenylpentan-3-yl)piperidin-4-ol (4m)**

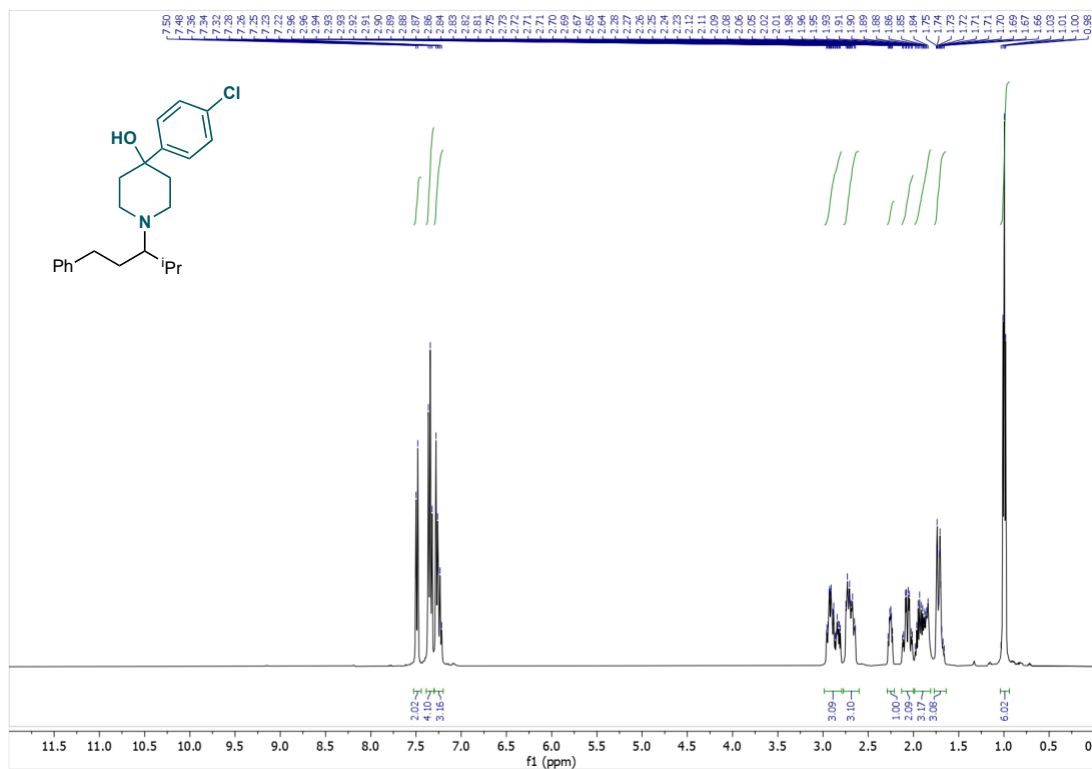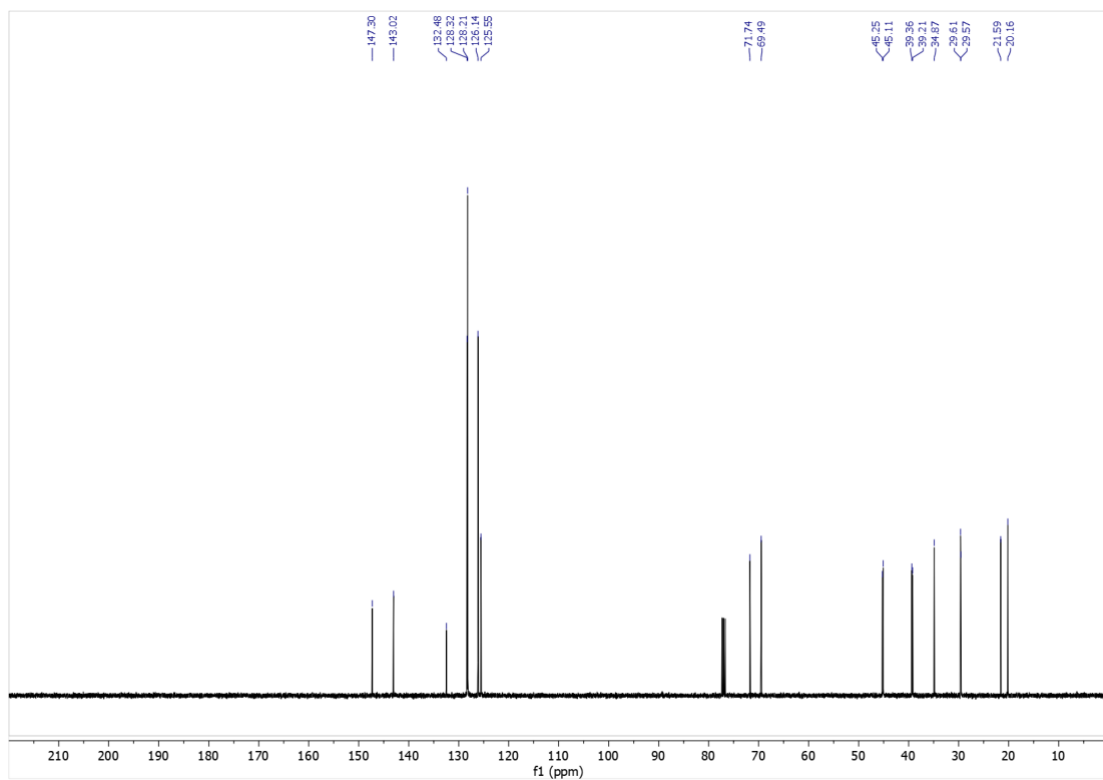

**4-(4-methyl-1-phenylpentan-3-yl)morpholine (4n)**

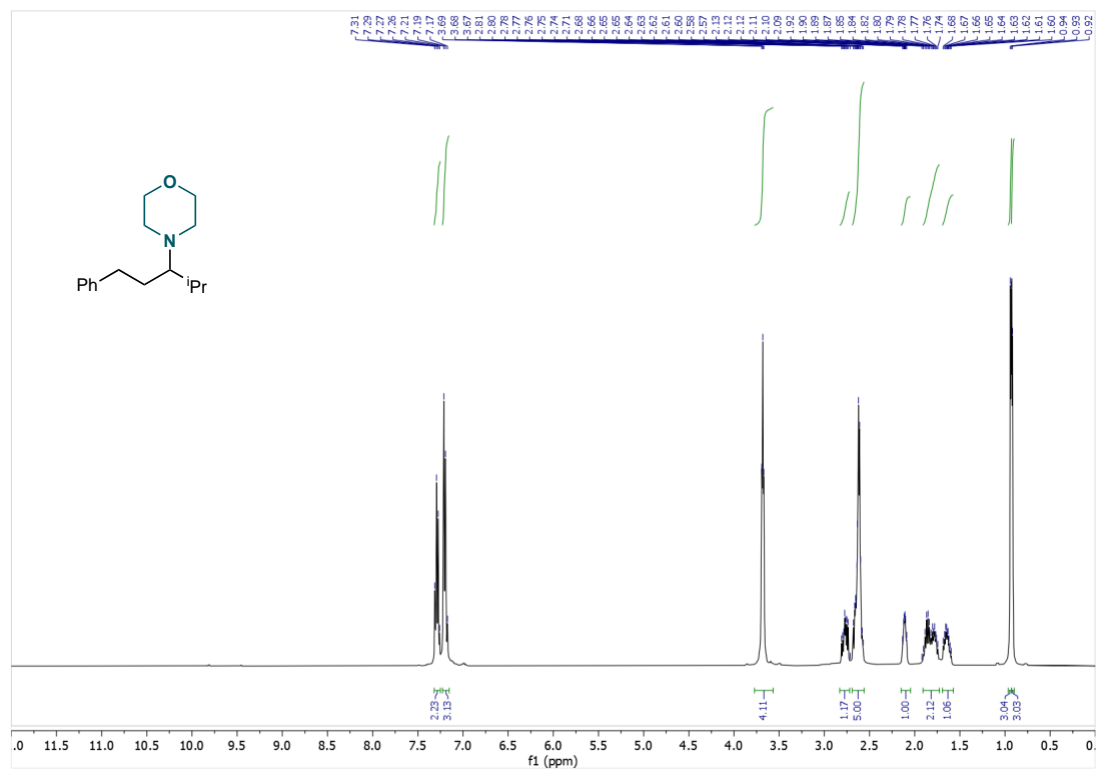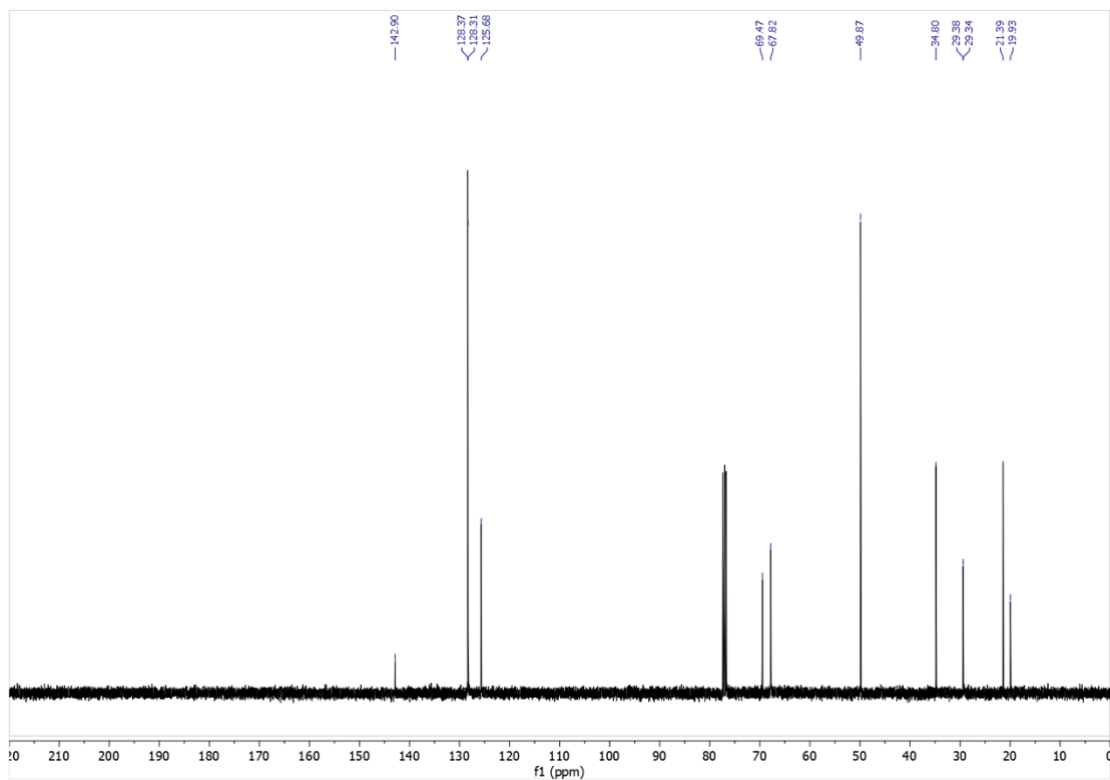



**Benzyl 4-(4-methyl-1-phenylpentan-3-yl)piperazine-1-carboxylate (4o)**

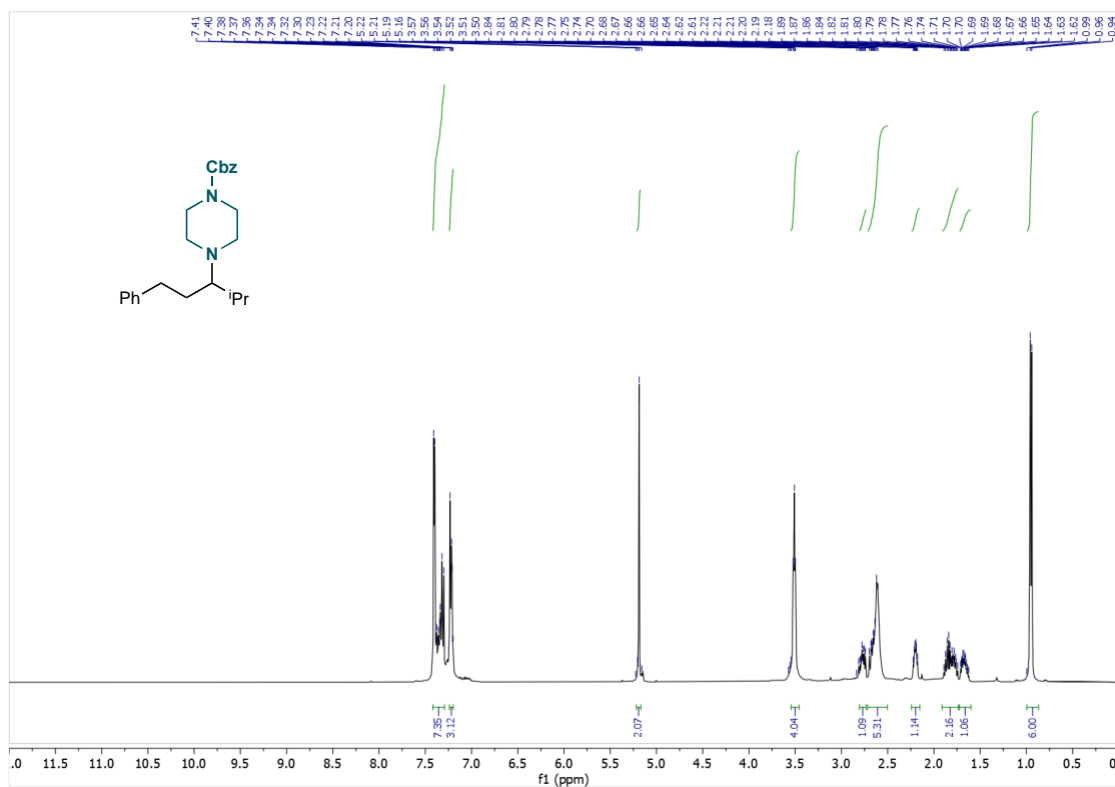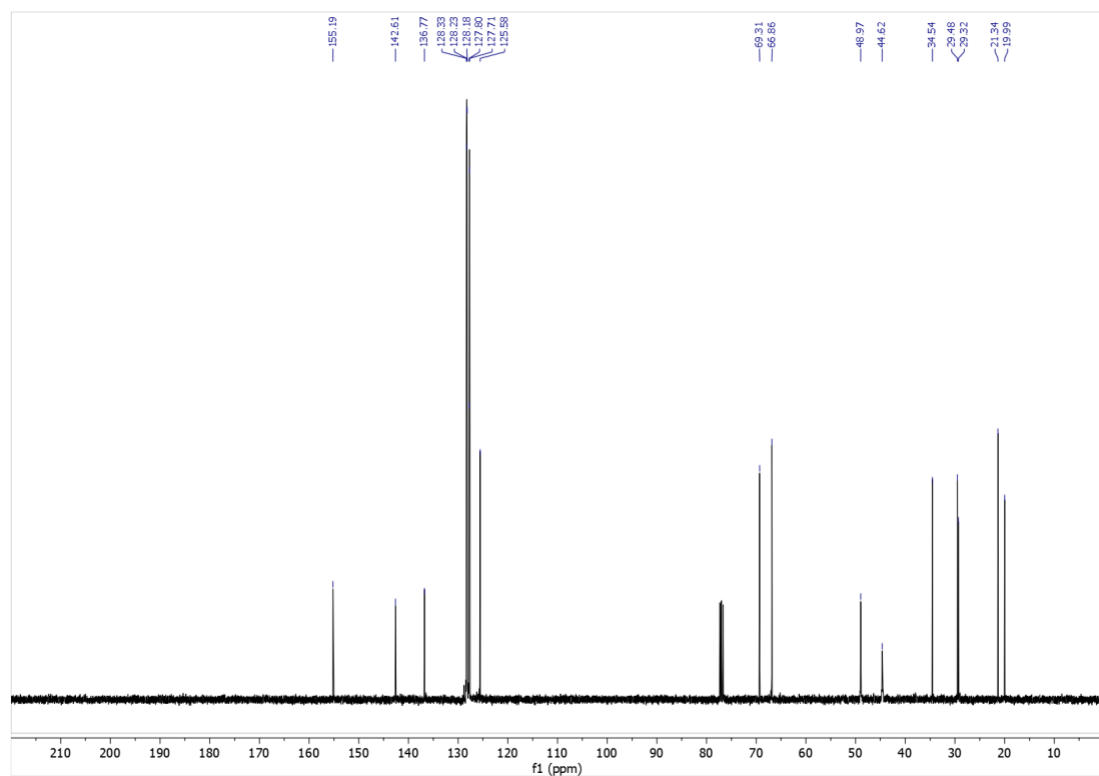

**4-(4-Methyl-1-phenylpentan-3-yl)thiomorpholine 1,1-dioxide (4p)**

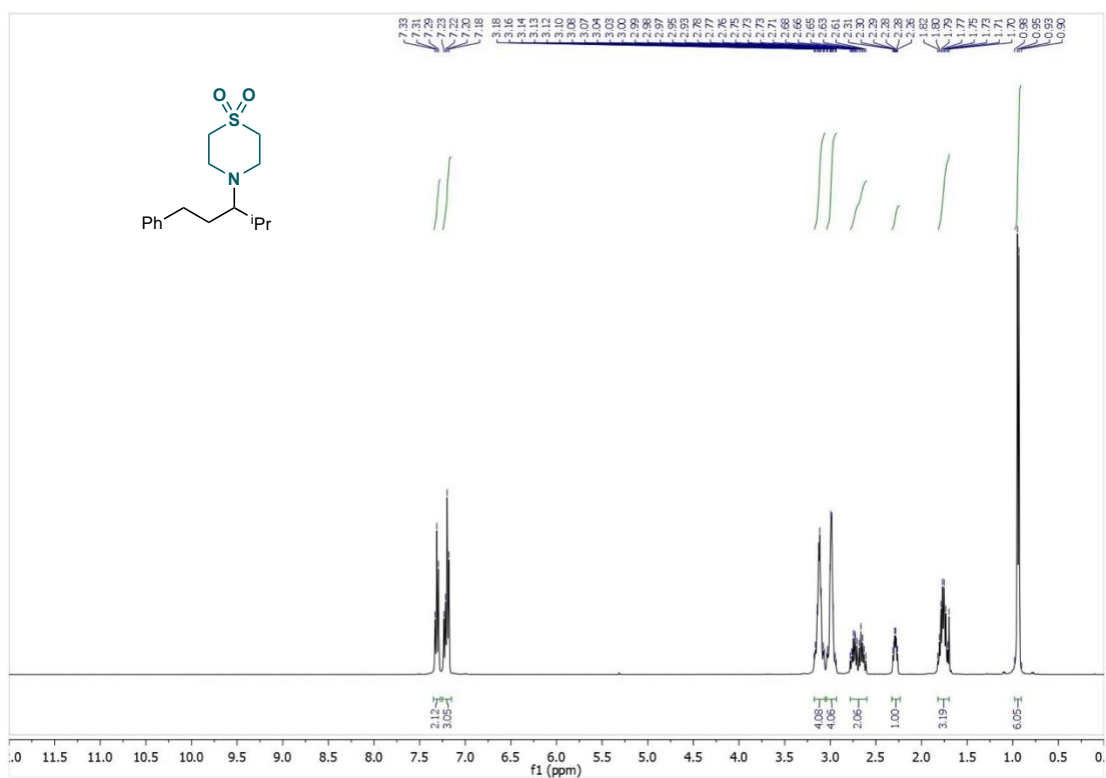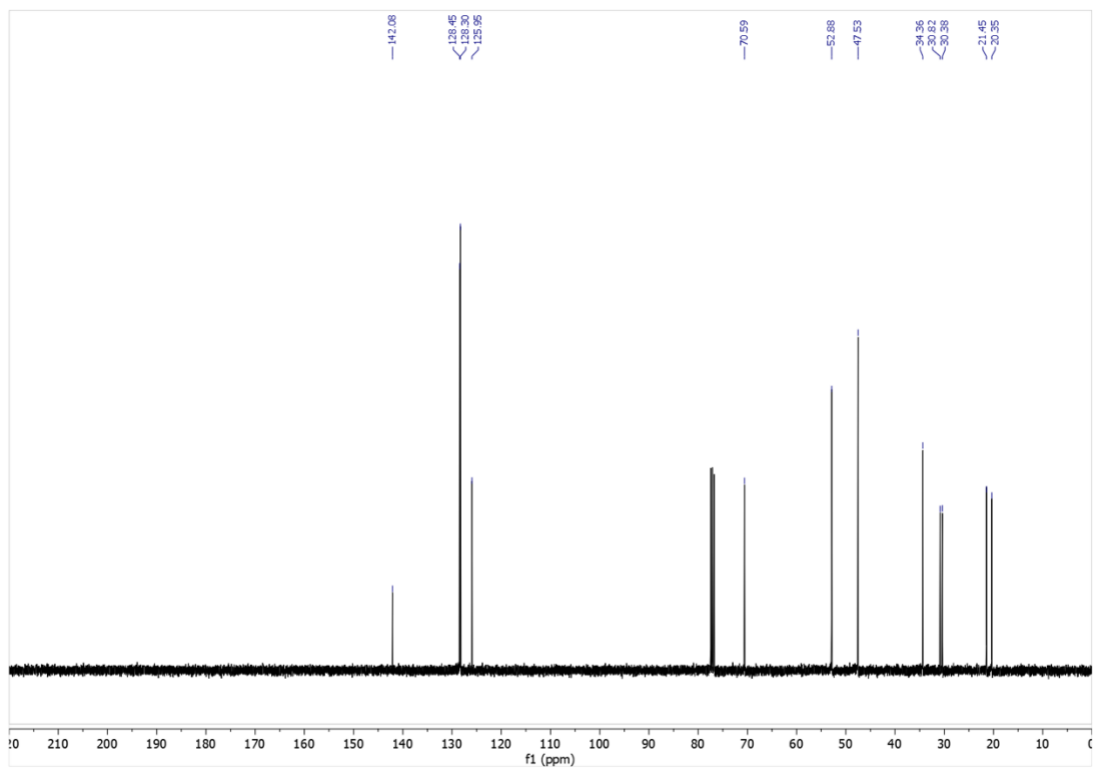

**1-(4-Methyl-1-phenylpentan-3-yl)-1,4-diazepan-5-one (4q)**

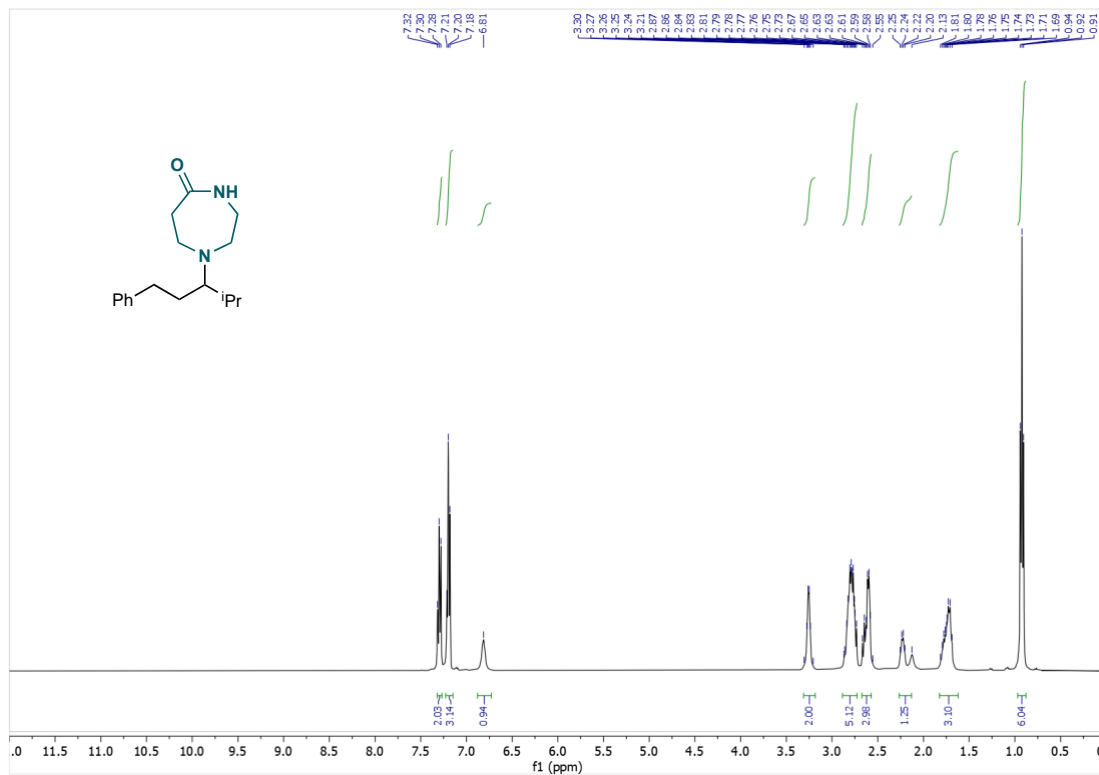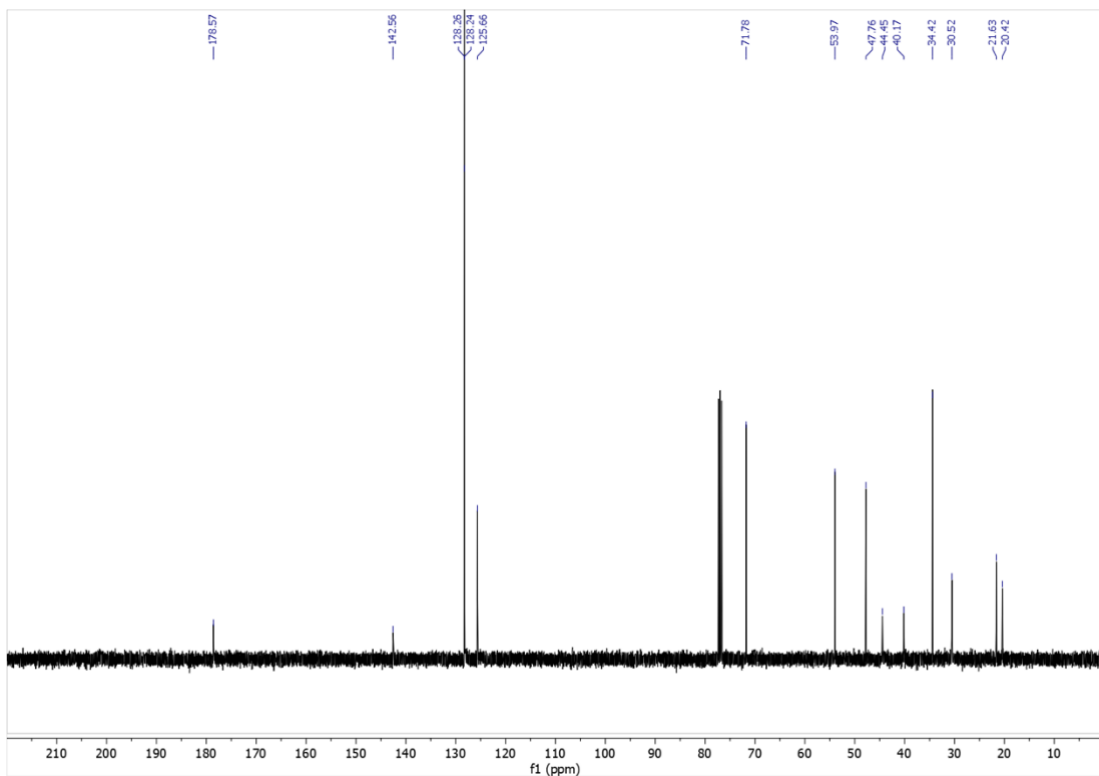

2-(4-Methyl-1-phenylpentan-3-yl)octahydrocyclopenta[c]pyrrole (4s)

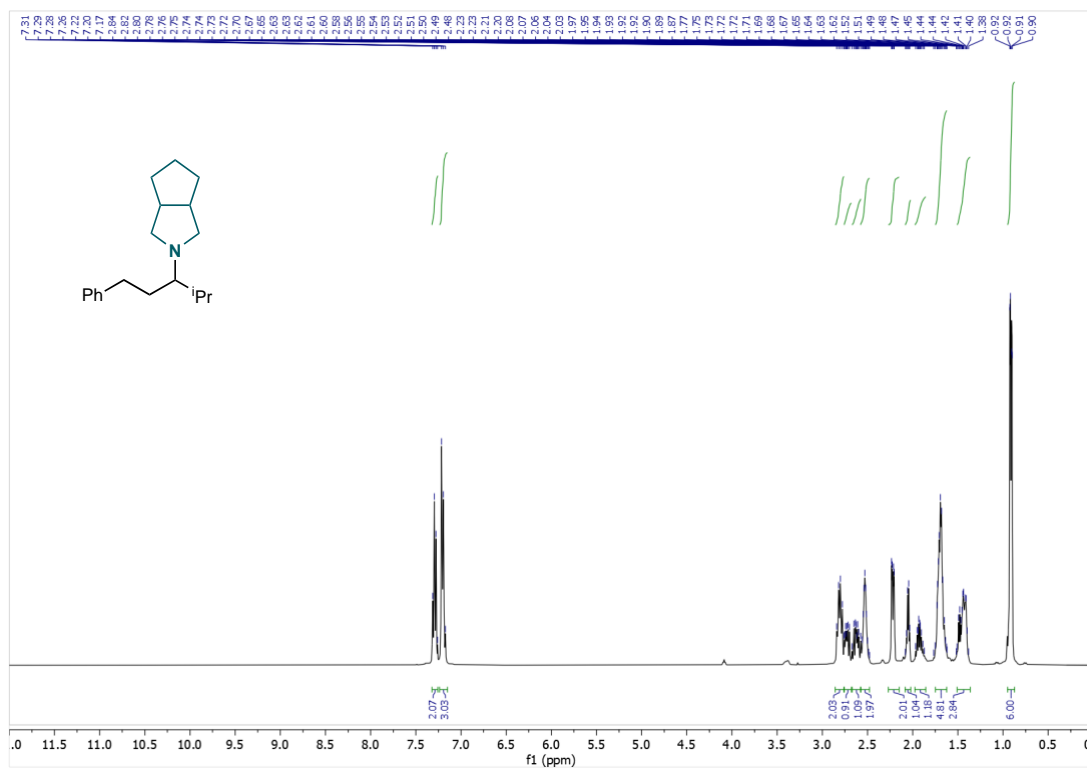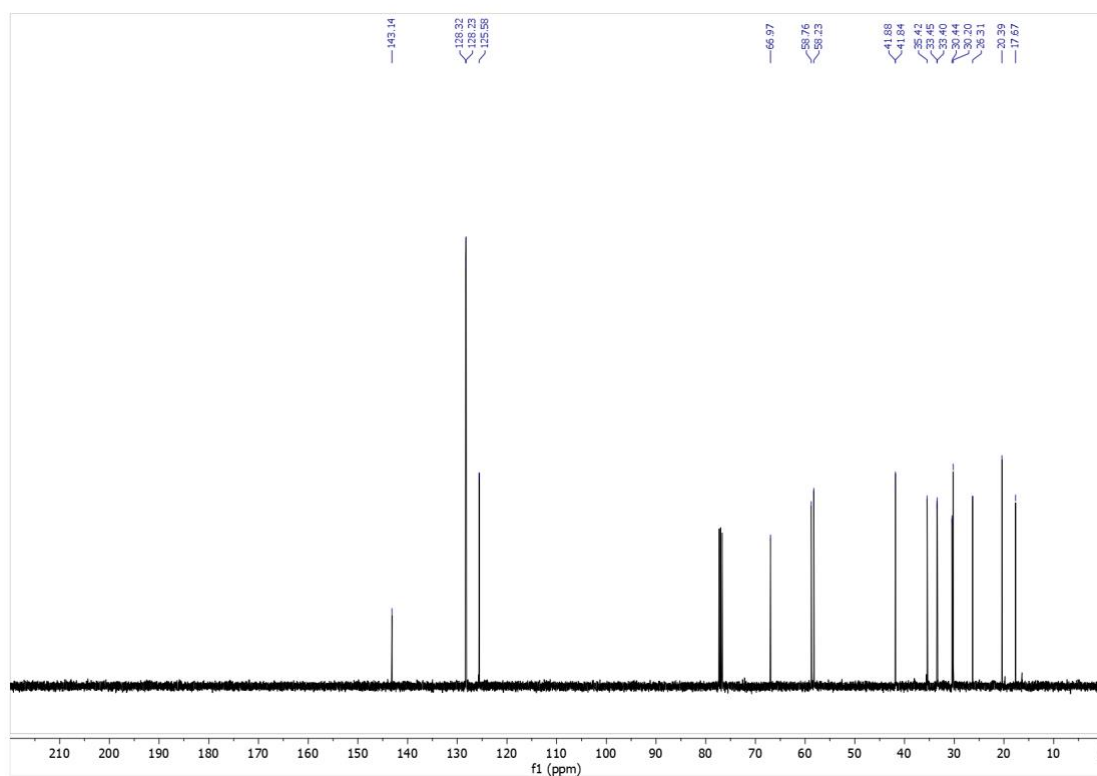

6-(4-Methyl-1-phenylpentan-3-yl)-4,5,6,7-tetrahydrothieno[2,3-c]pyridine (4t)

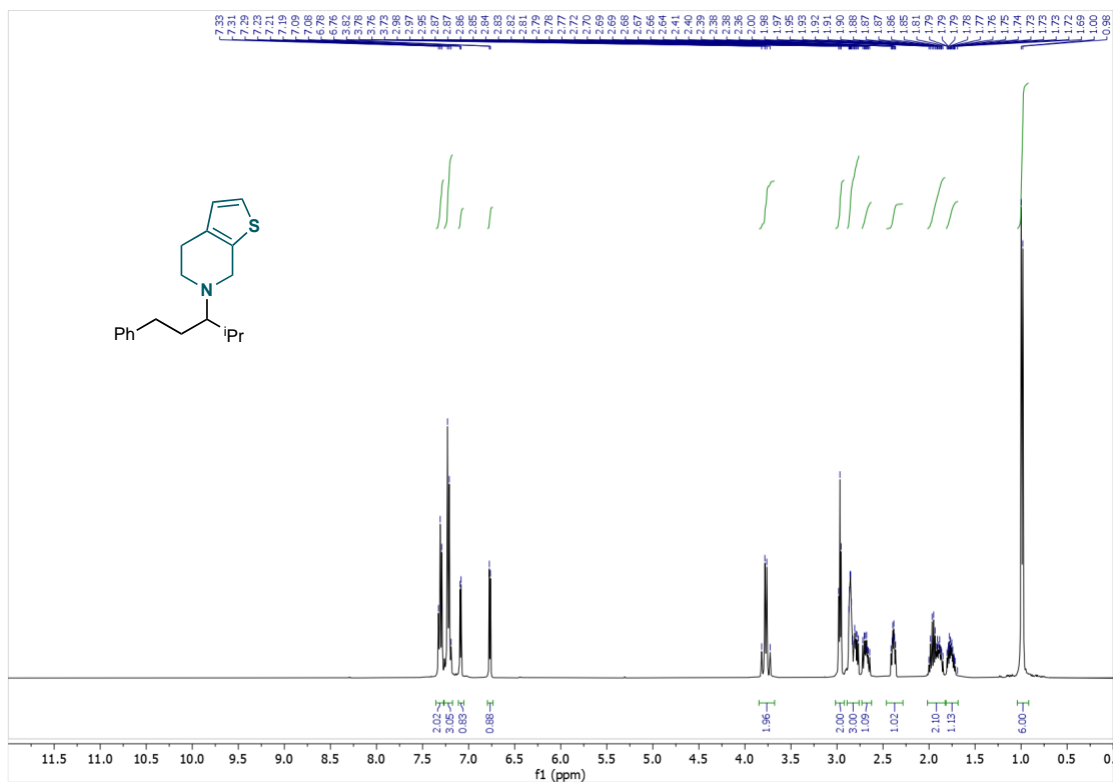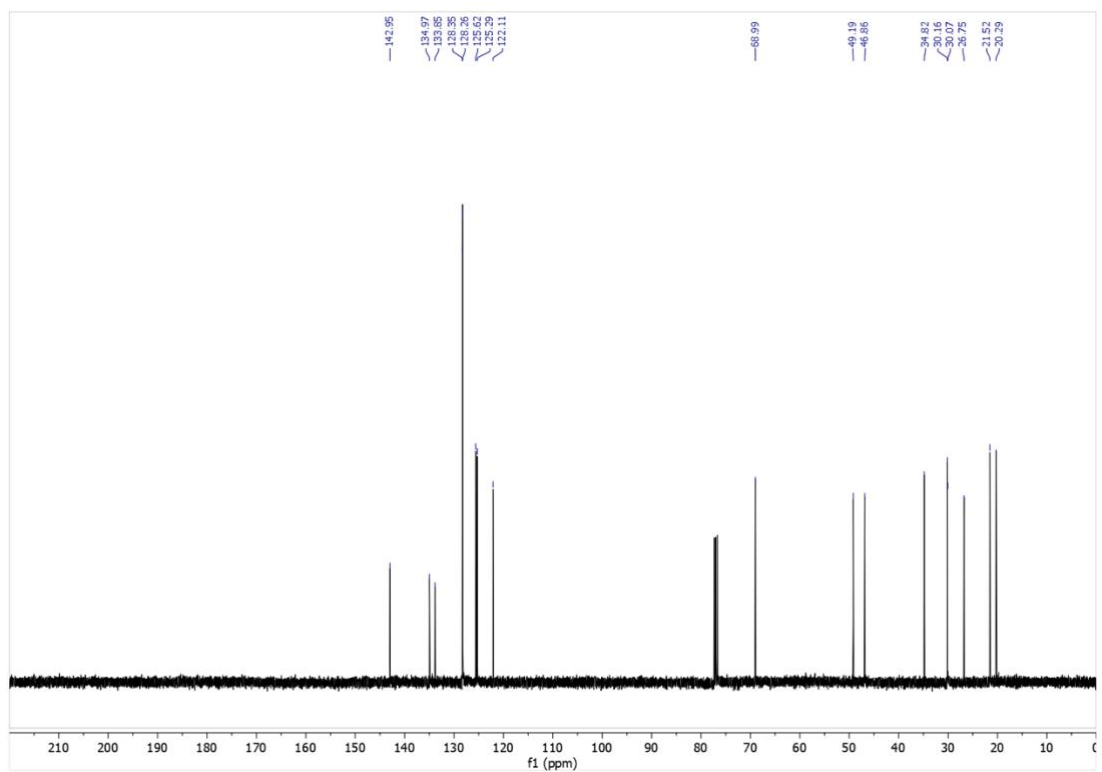

**8-(4-Methyl-1-phenylpentan-3-yl)-8-azabicyclo[3.2.1]octan-3-one (4u)**

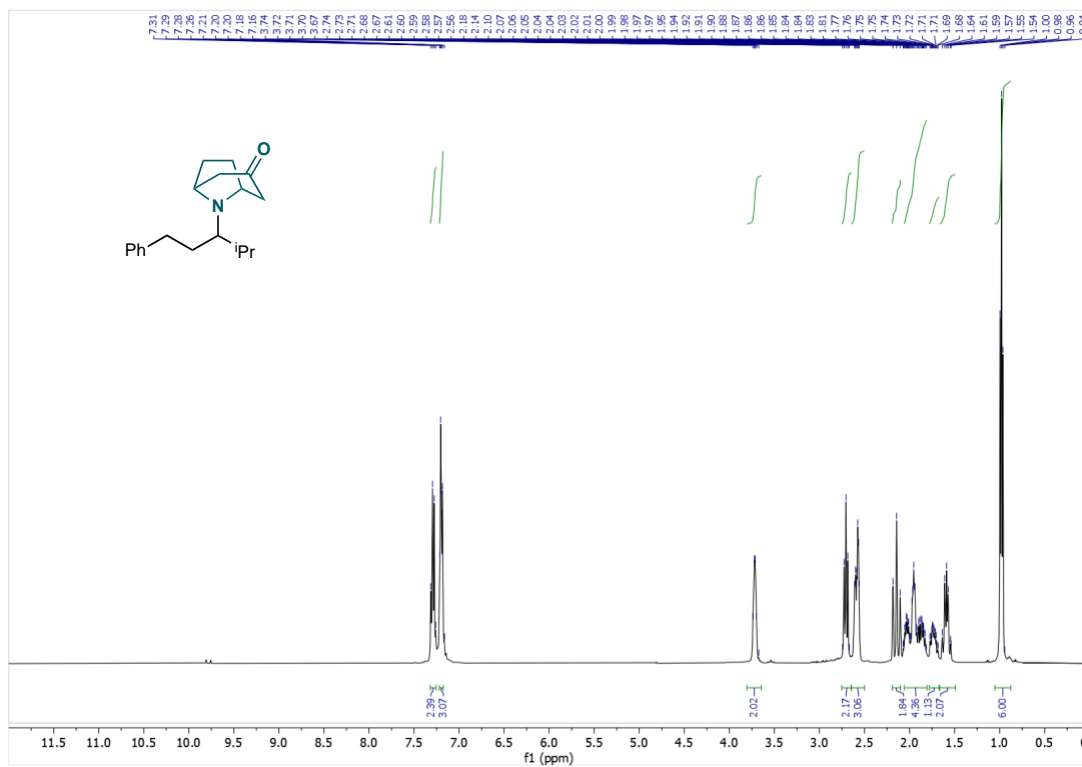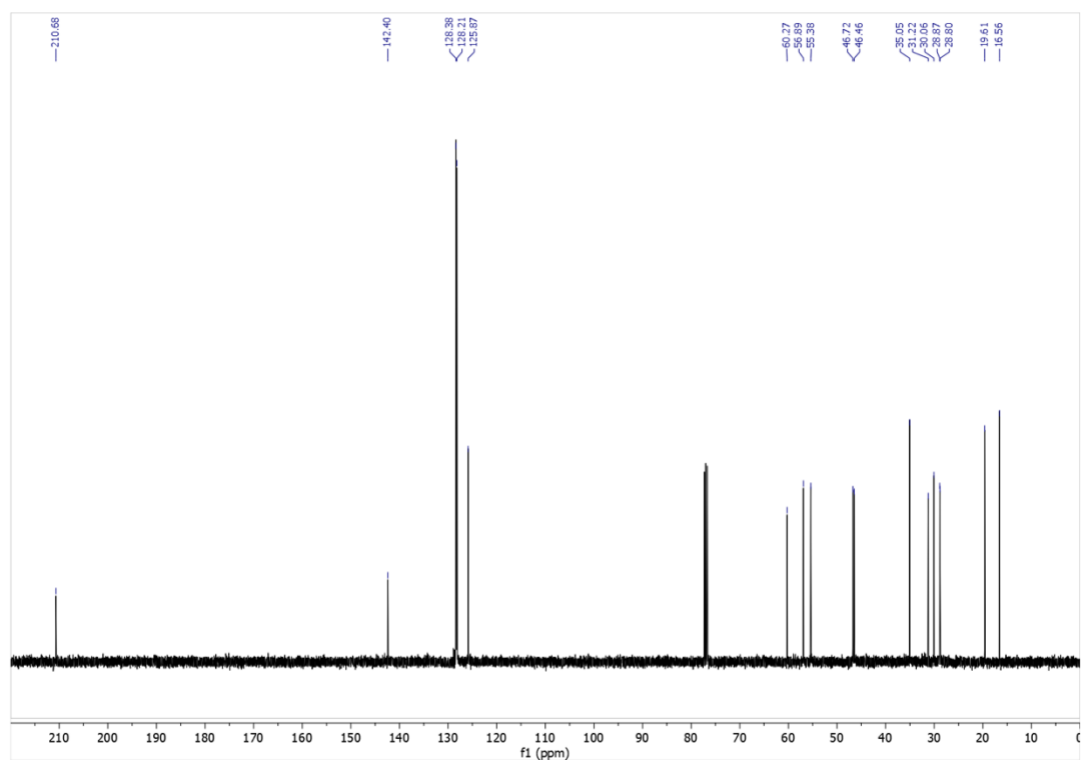

**3-(4-Methyl-1-phenylpentan-3-yl)-8-oxa-3-azabicyclo[3.2.1]octane (4v)**

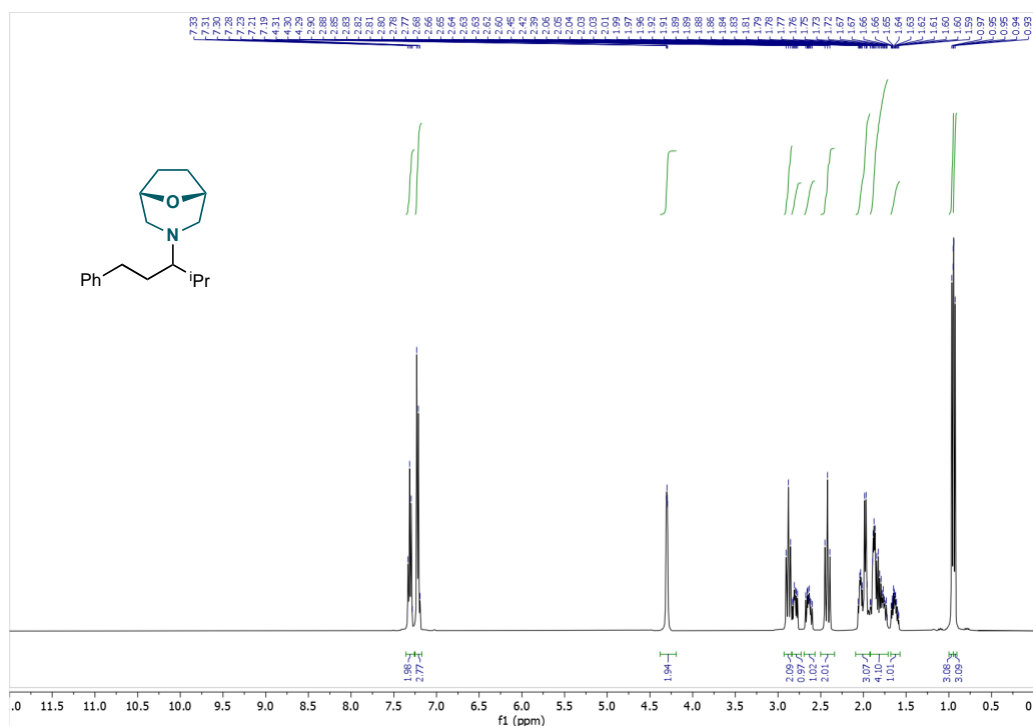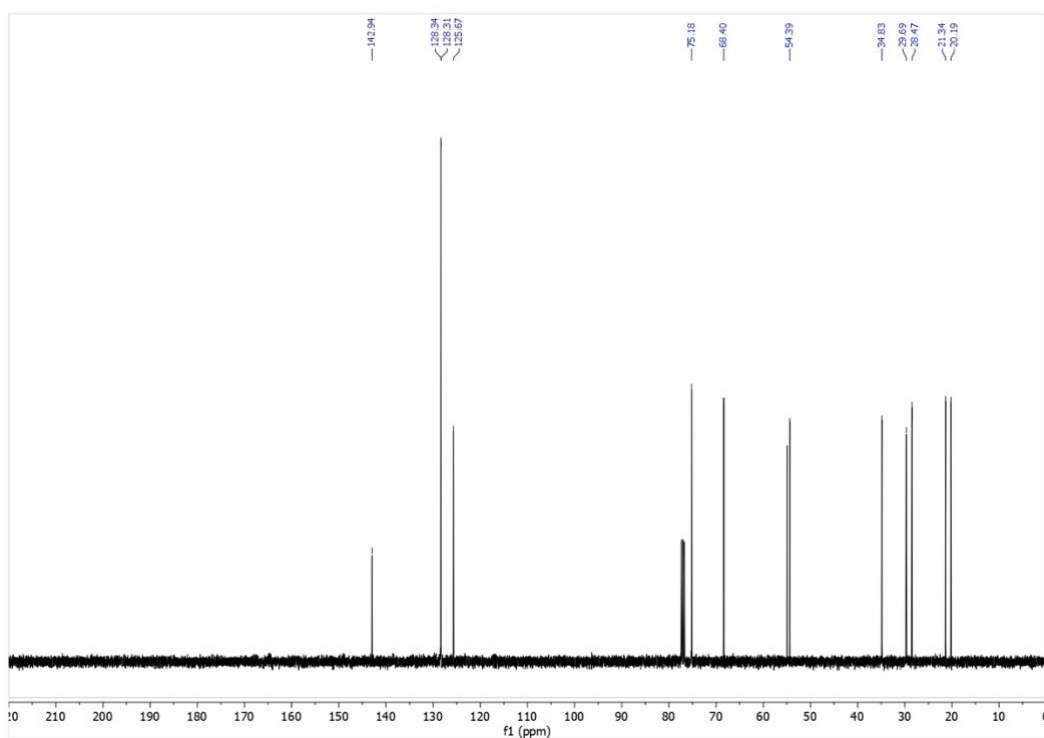

**8-(4-Methyl-1-phenylpentan-3-yl)-1-phenyl-1,3,8-triazaspiro[4.5]decan-4-one (4w)**

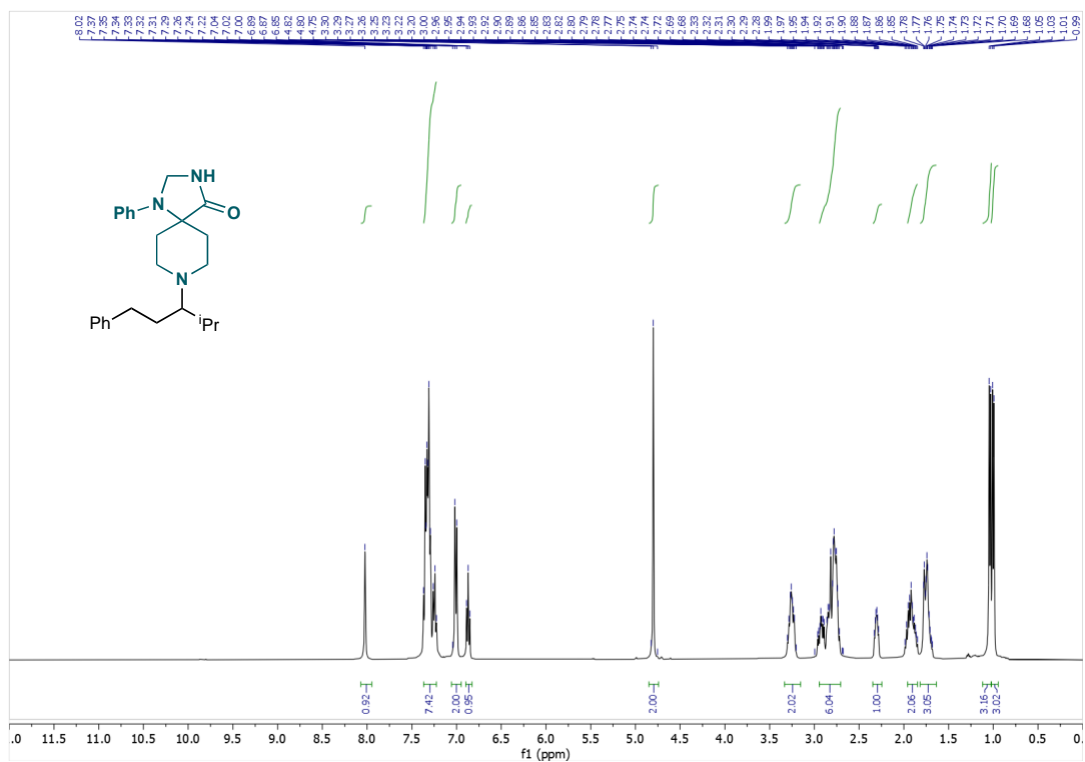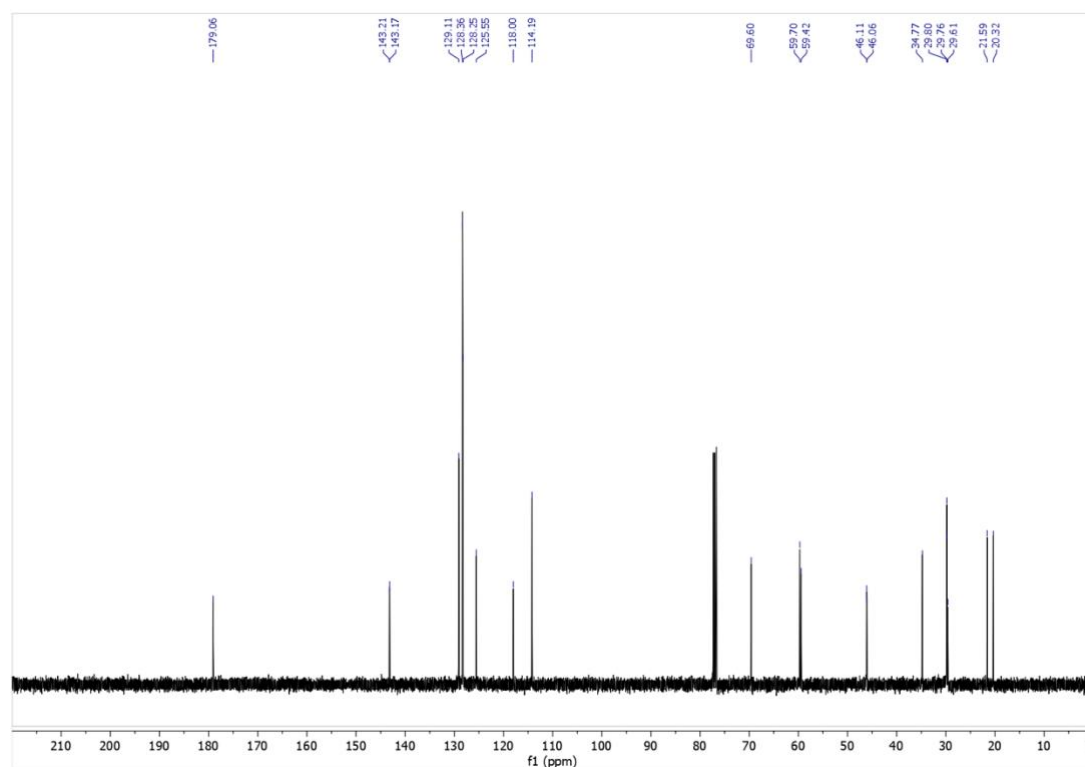



# N,4-dimethyl-1-phenylpentan-3-amine (6a)

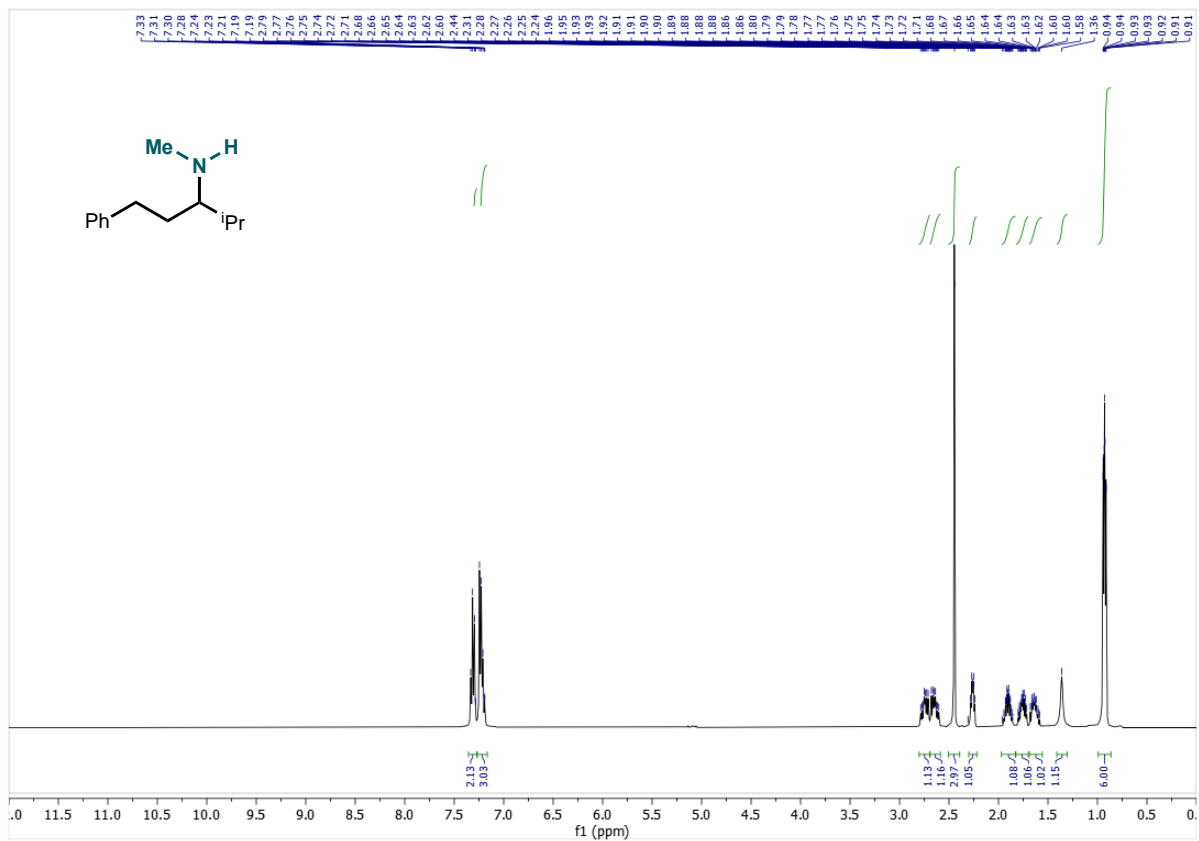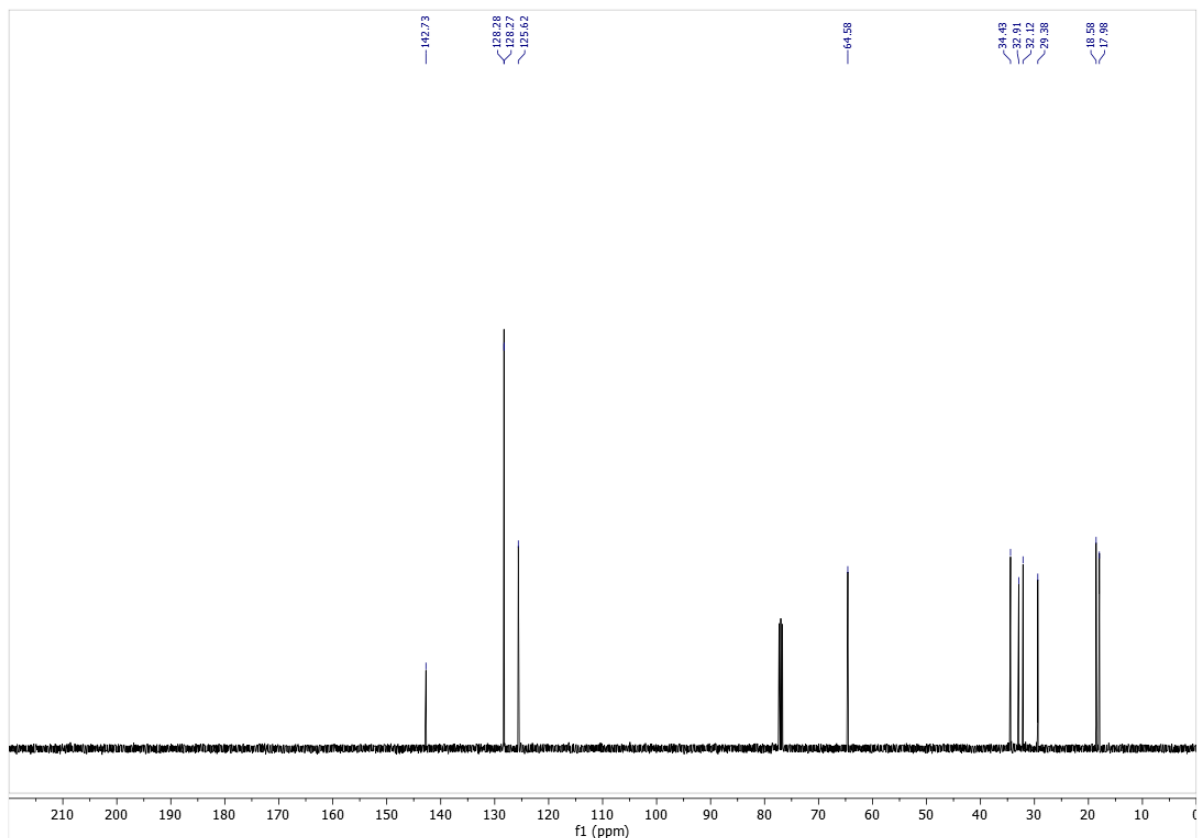

# N-Benzyl-4-methyl-1-phenylpentan-3-amine (6b)

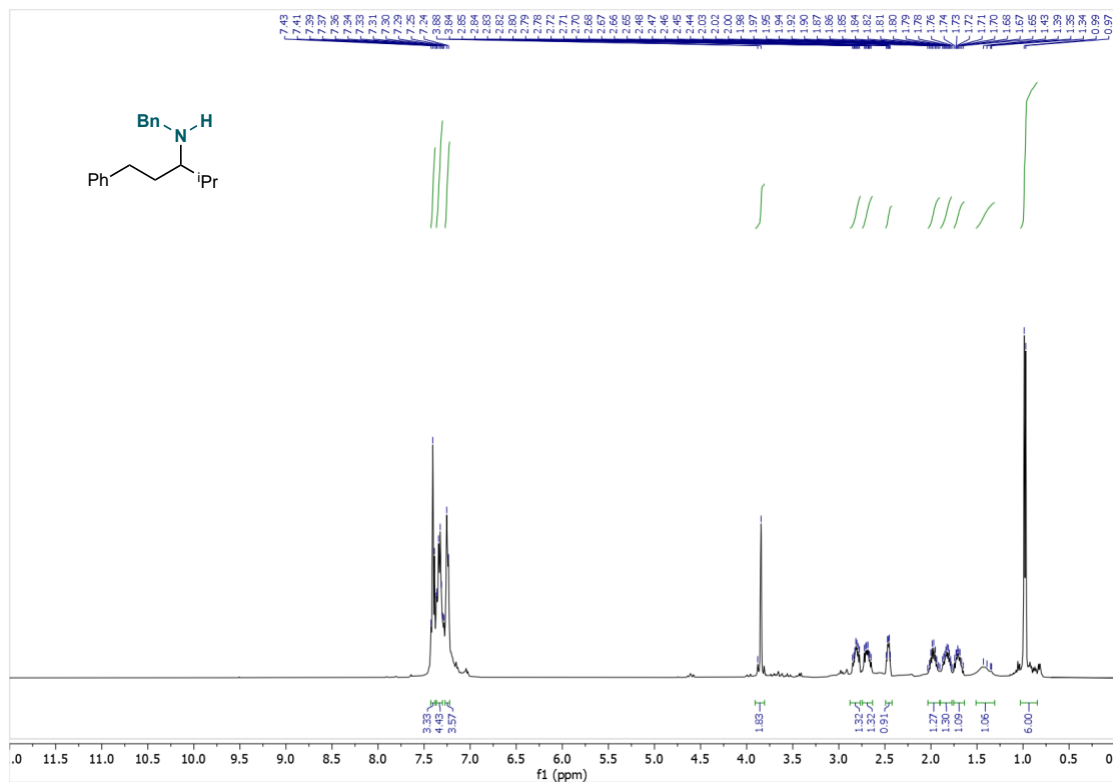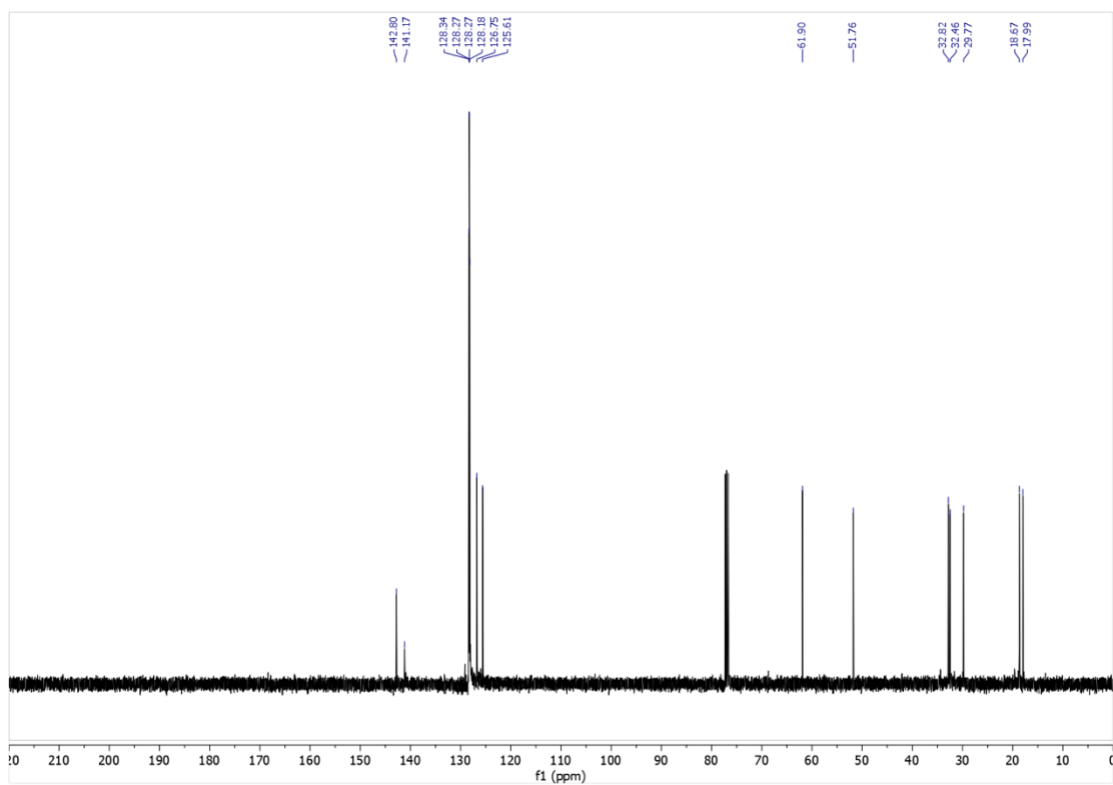

**N-(but-3-en-1-yl)-4-methyl-1-phenylpentan-3-amine (6c)**

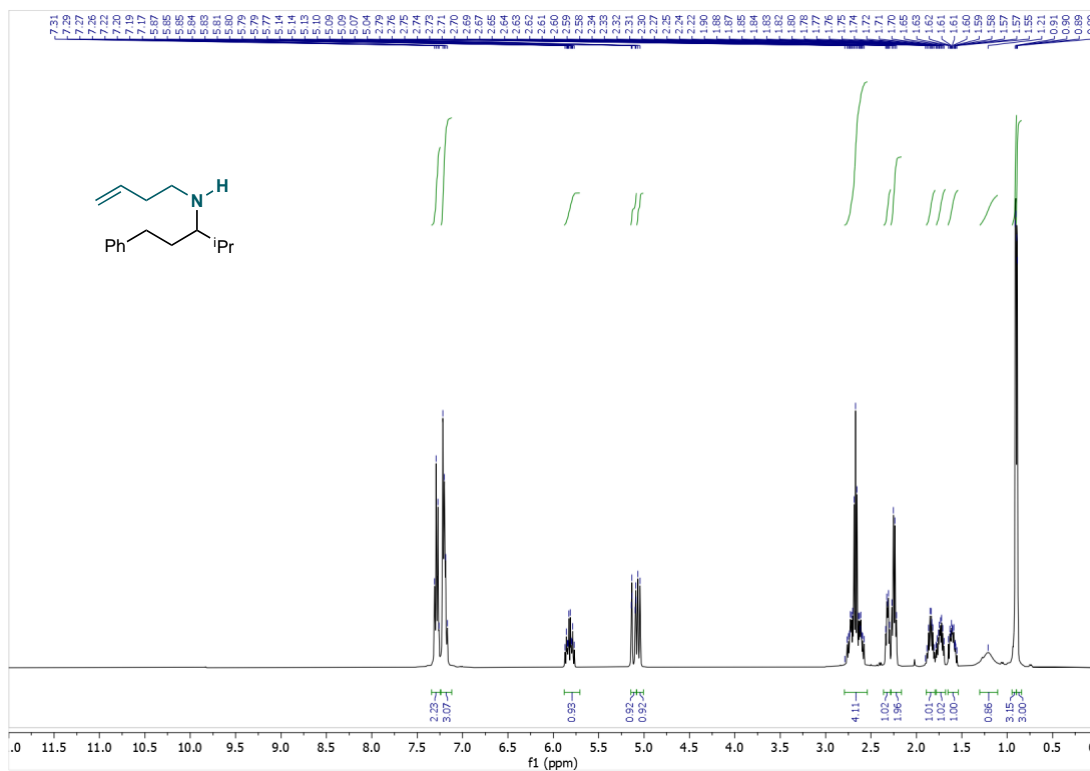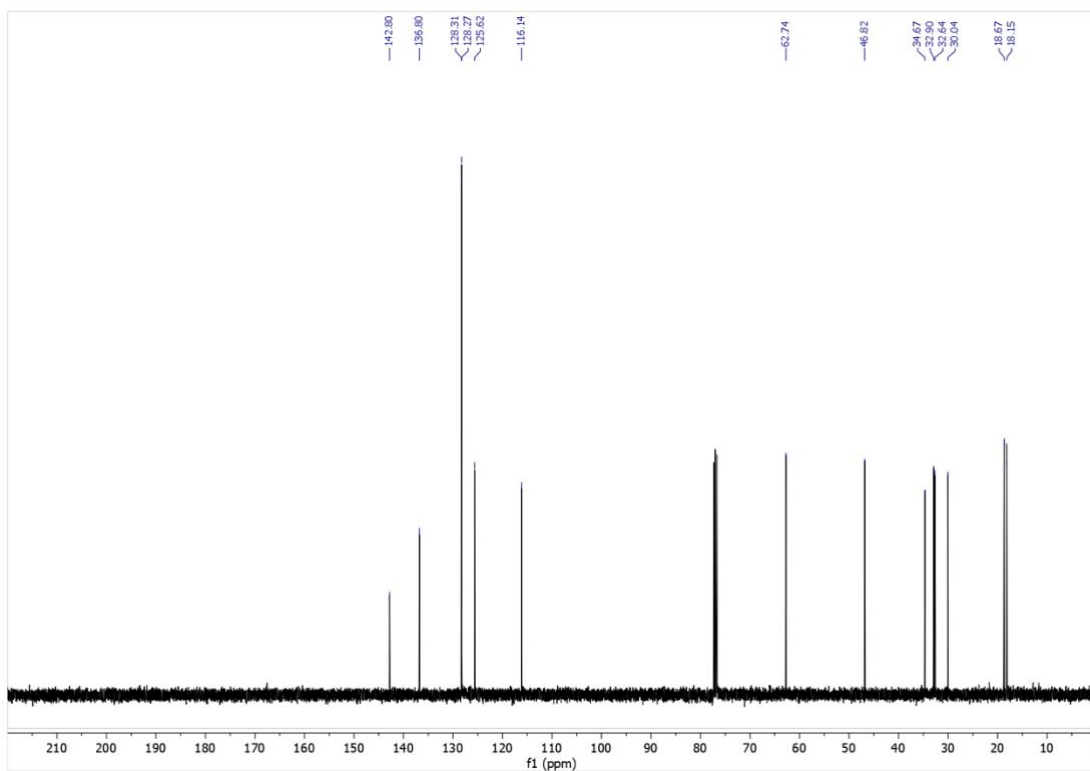



# N-(2,2-Difluoroethyl)-4-methyl-1-phenylpentan-3-amine (6e)

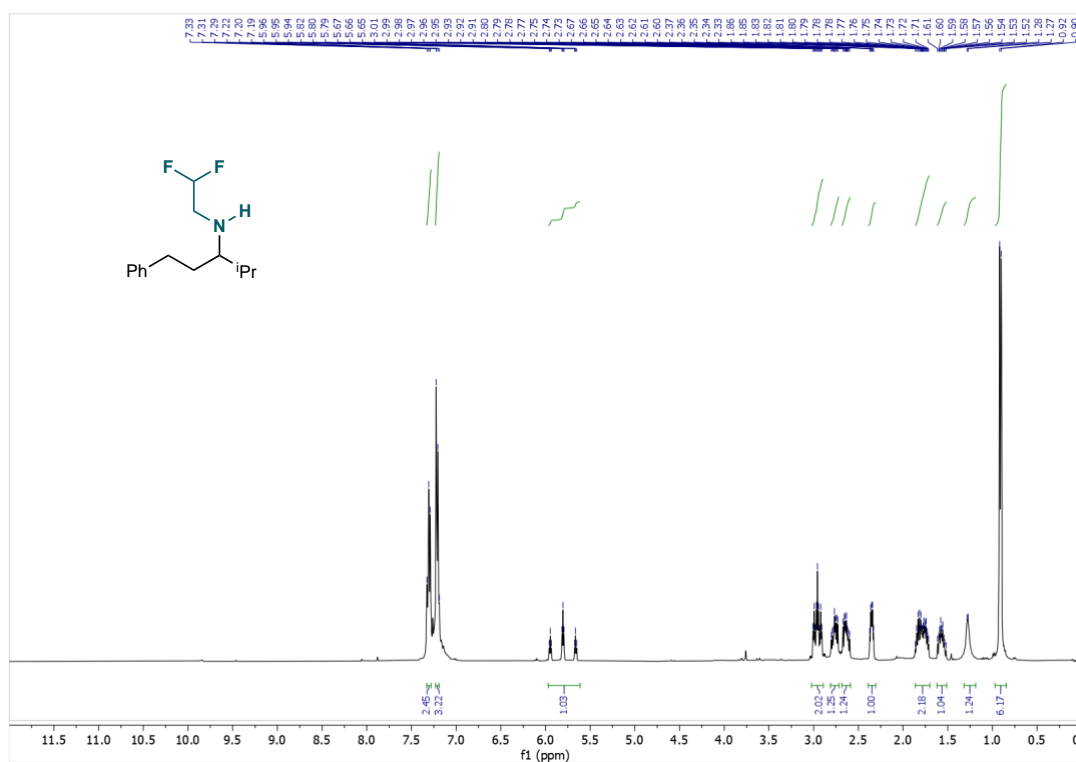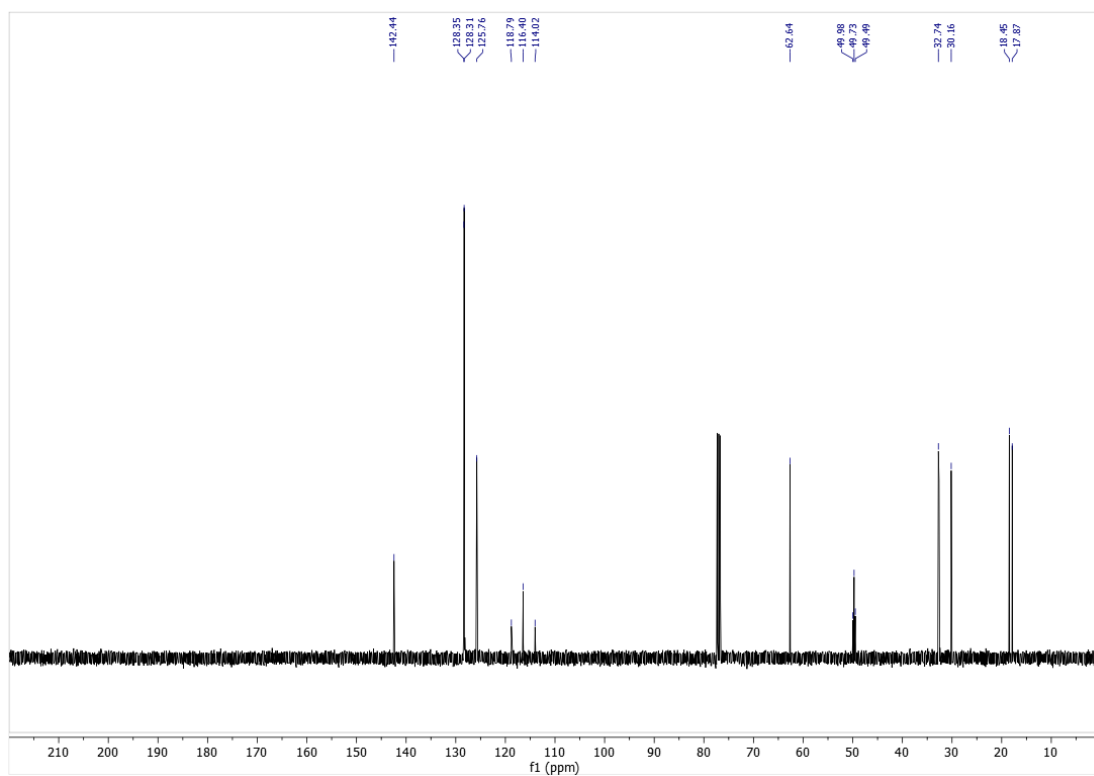

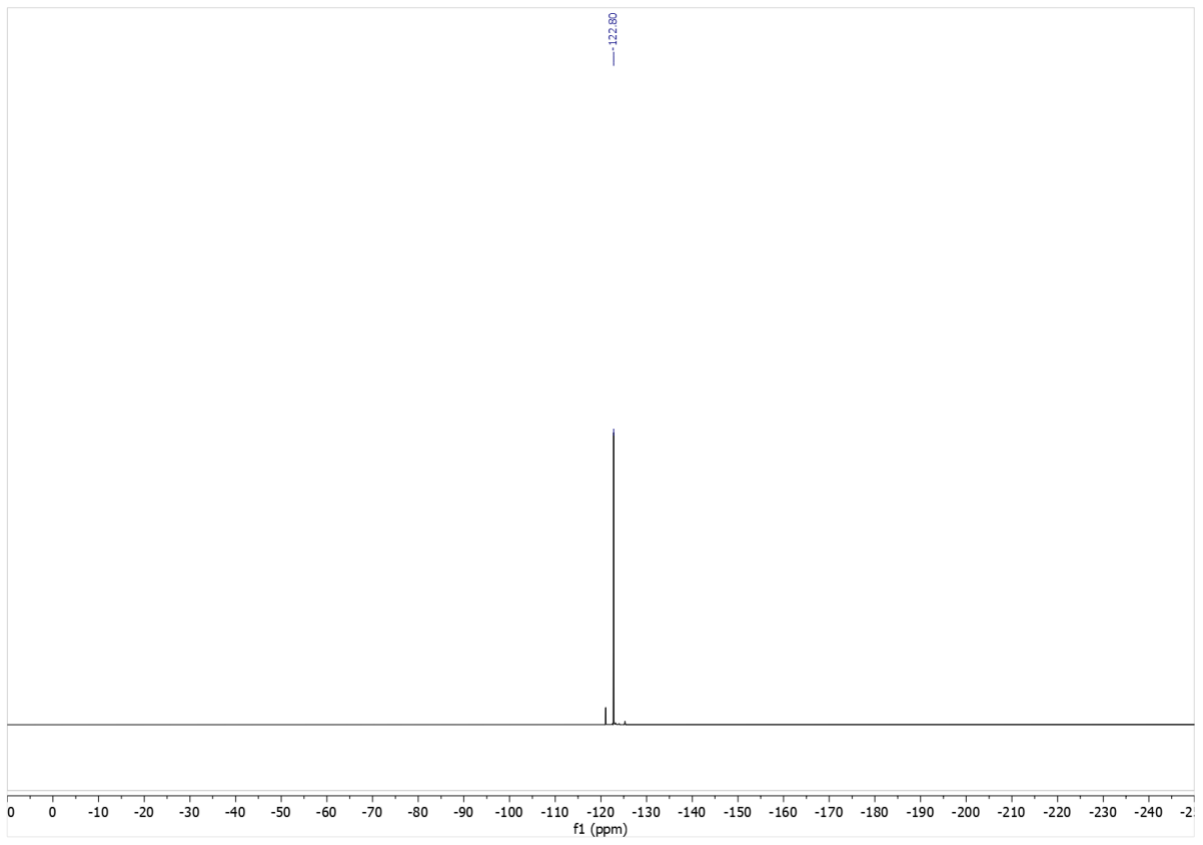

### 4-Methyl-1-phenyl-N-(2-(pyridin-4-yl)ethyl)pentan-3-amine (6f)

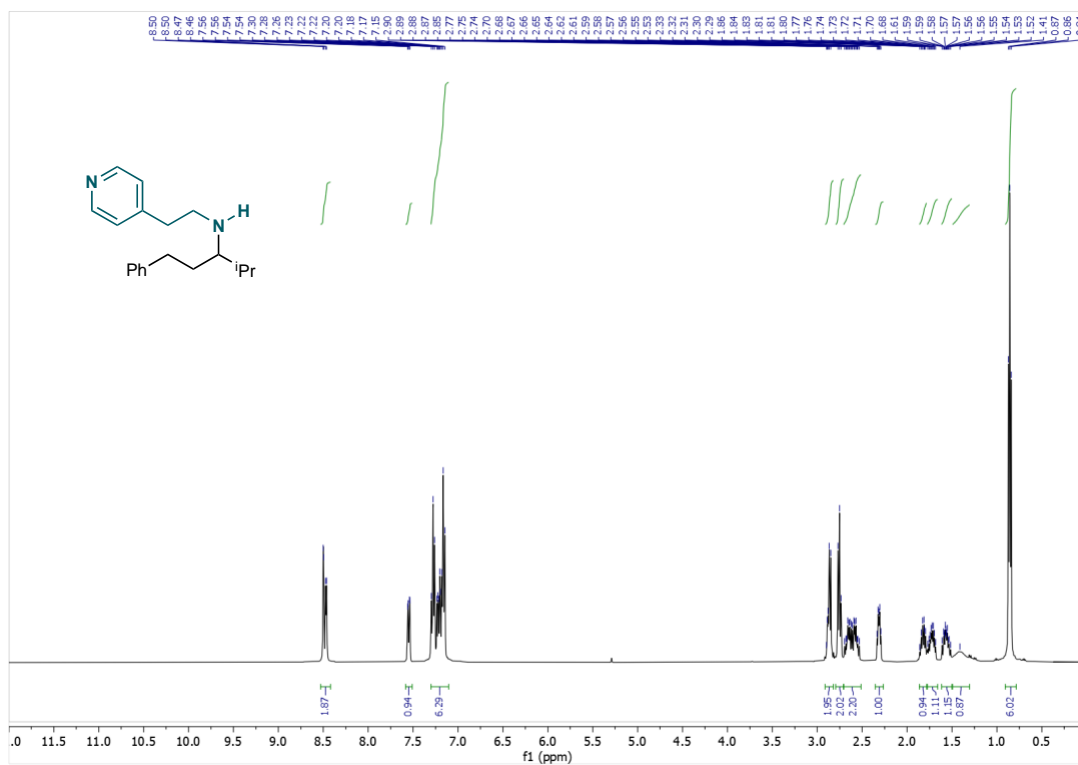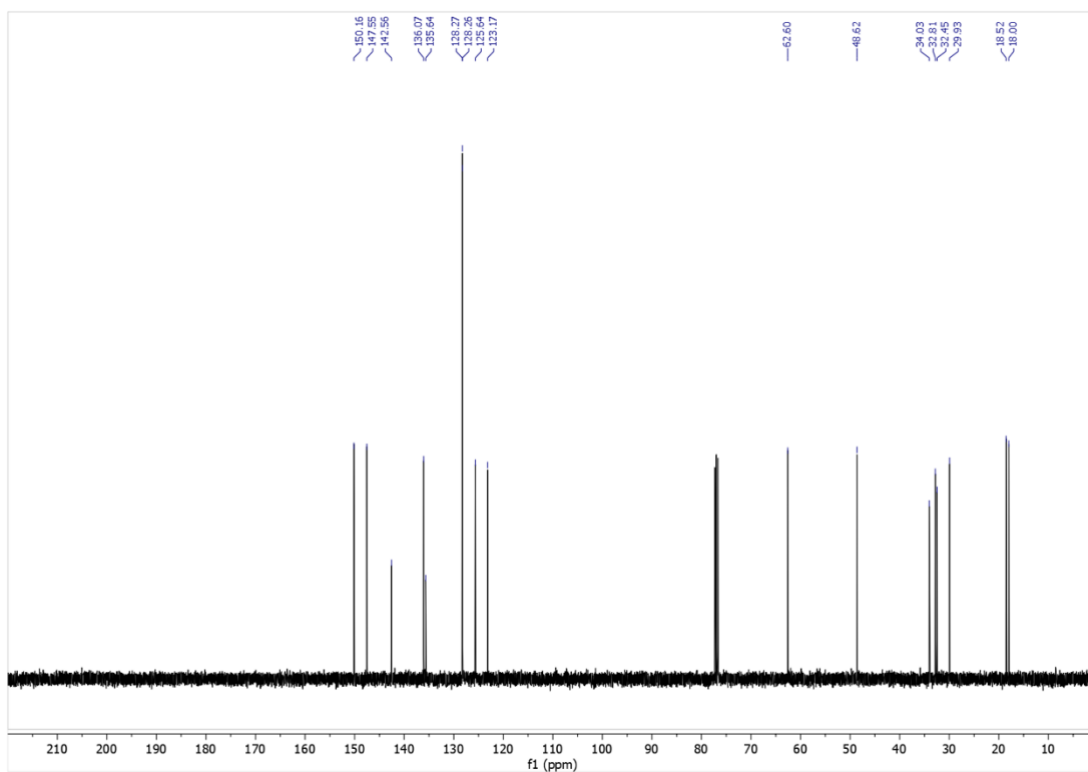

# N-(4-Methyl-1-phenylpentan-3-yl)tetrahydro-2H-pyran-4-amine (6g)

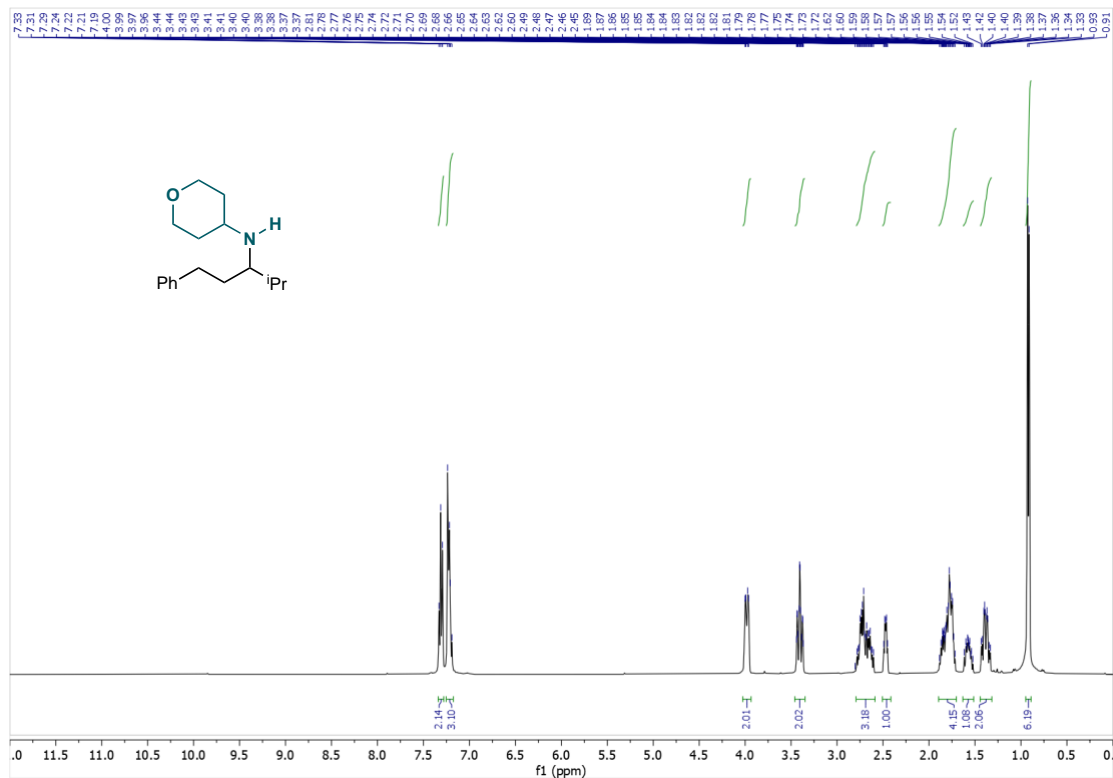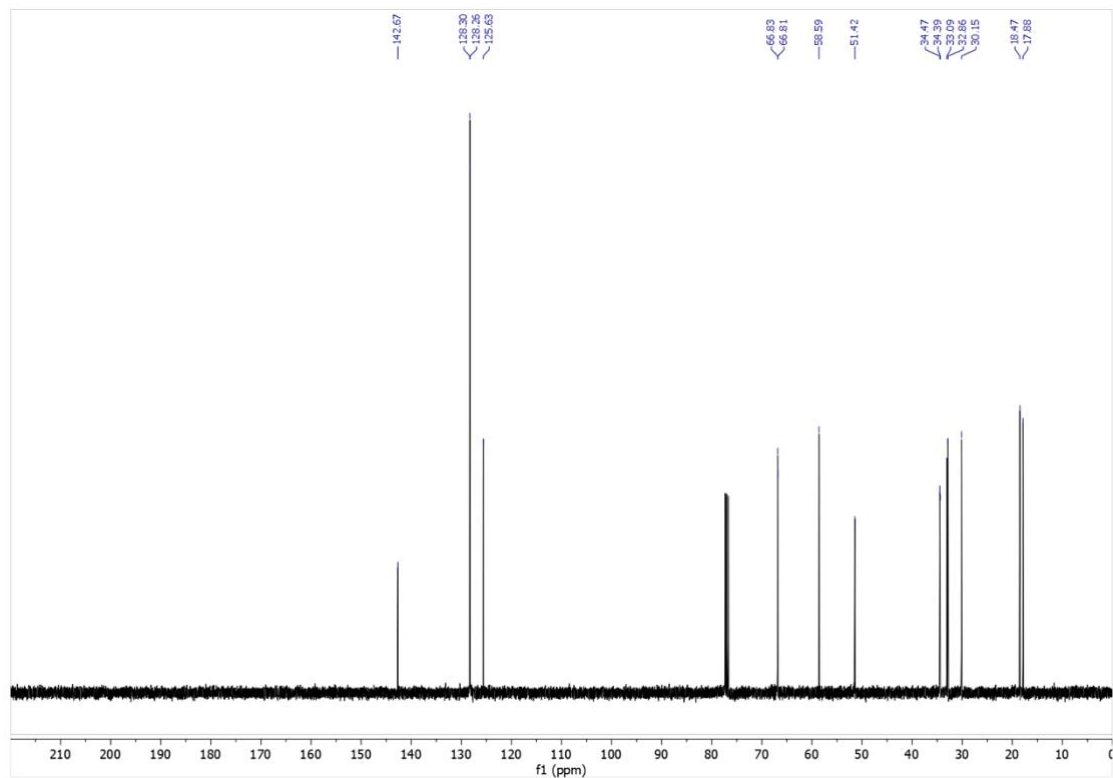



**Benzyl 4-((4-methyl-1-phenylpentan-3-yl)amino)piperidine-1-carboxylate (6h)**

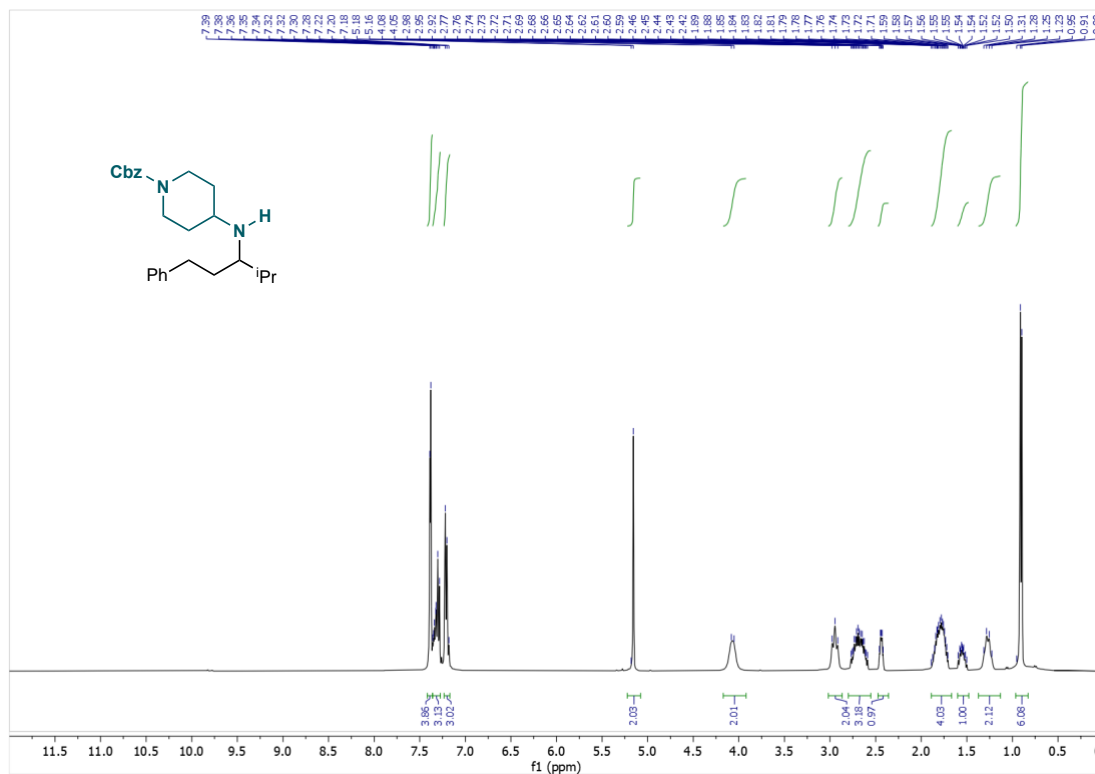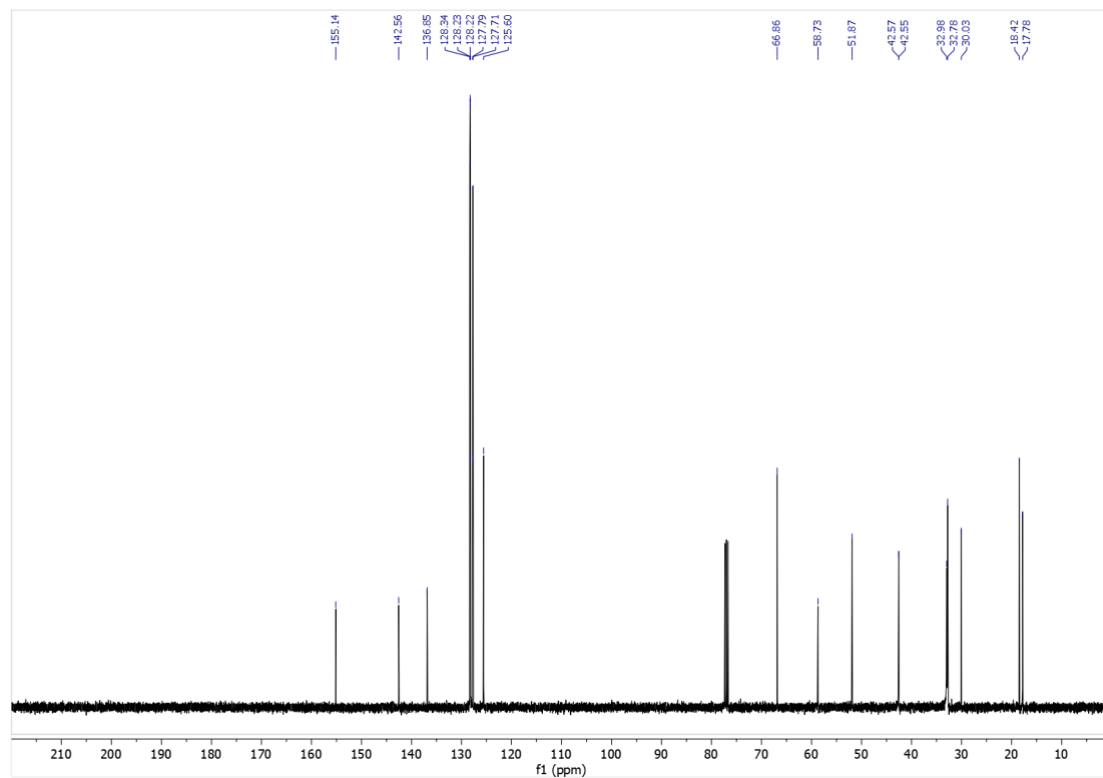

**1-Ethynyl-N-(4-methyl-1-phenylpentan-3-yl)cyclohexan-1-amine (6i)**

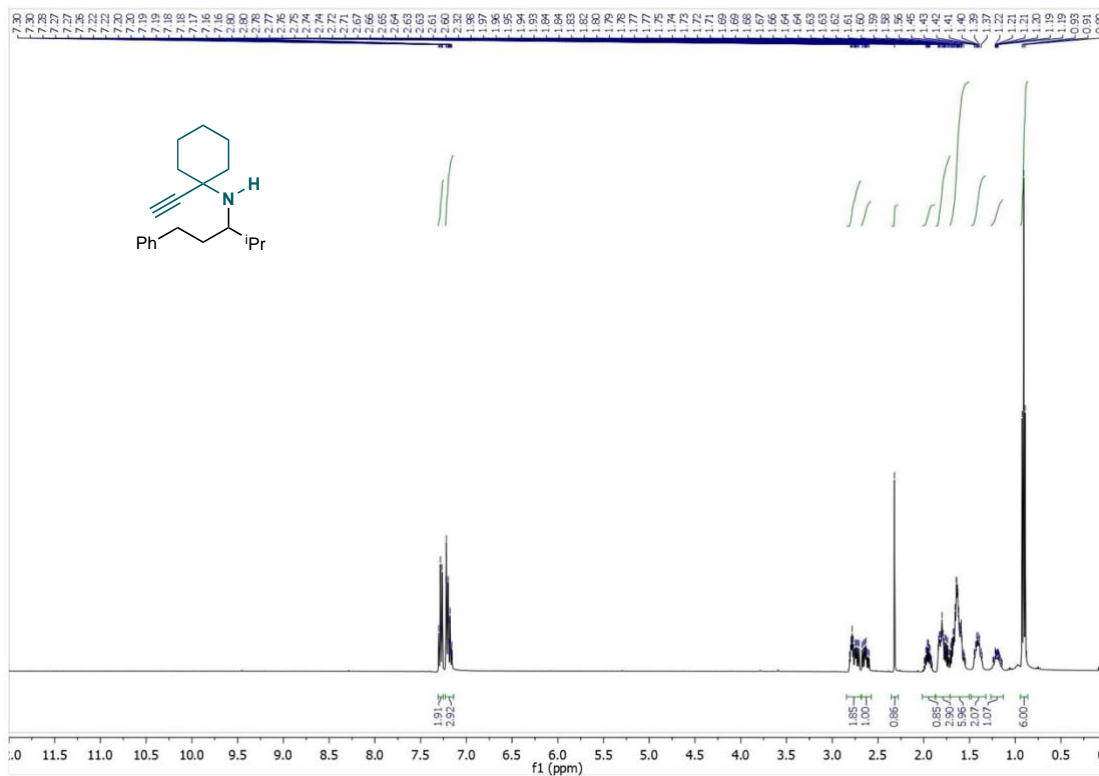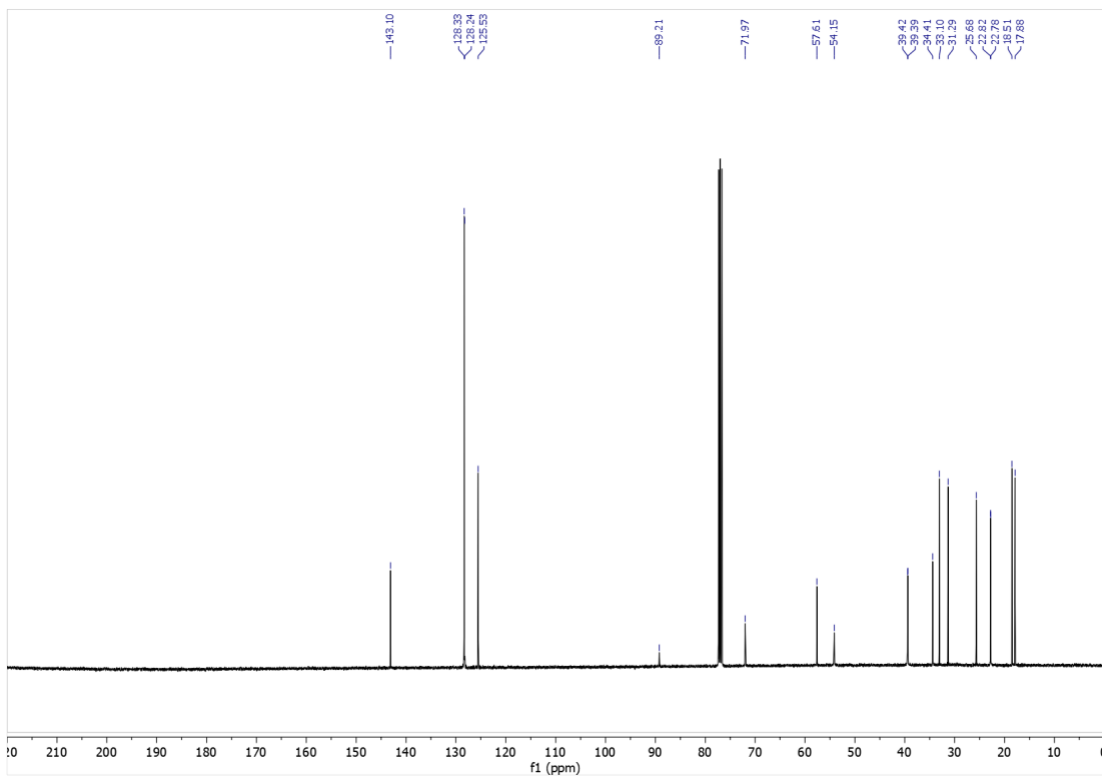

**N-(4-Methyl-1-phenylpentan-3-yl)adamantan-1-amine (6j)**

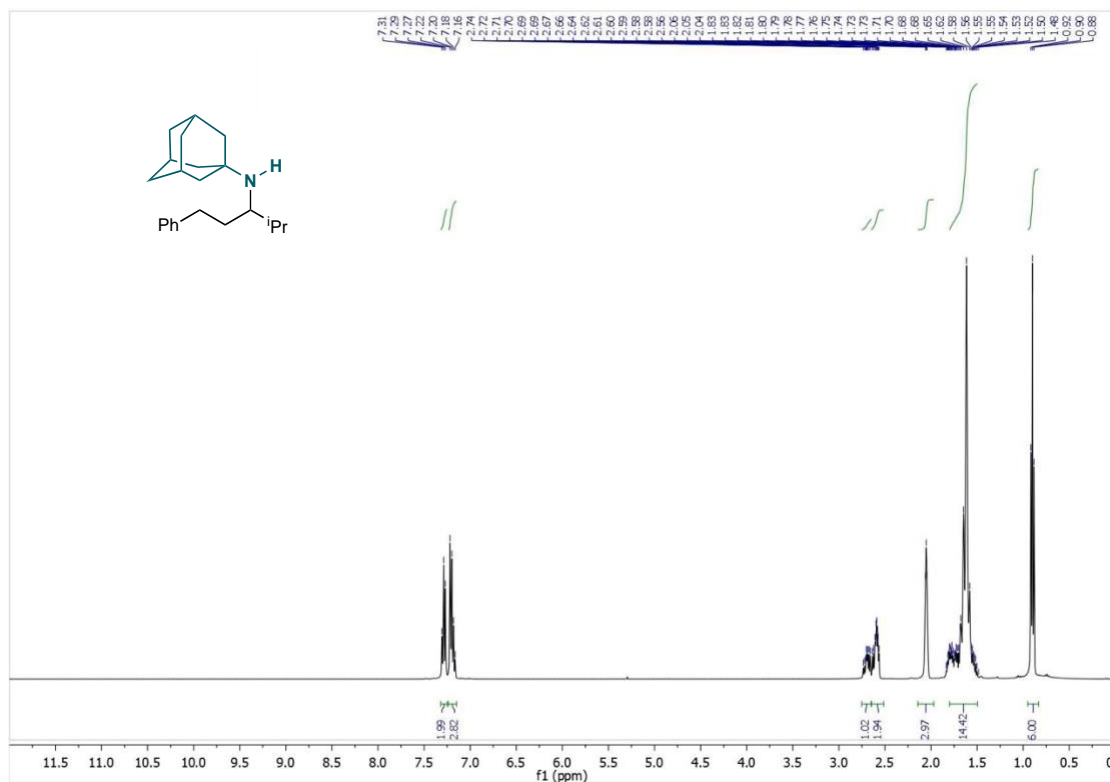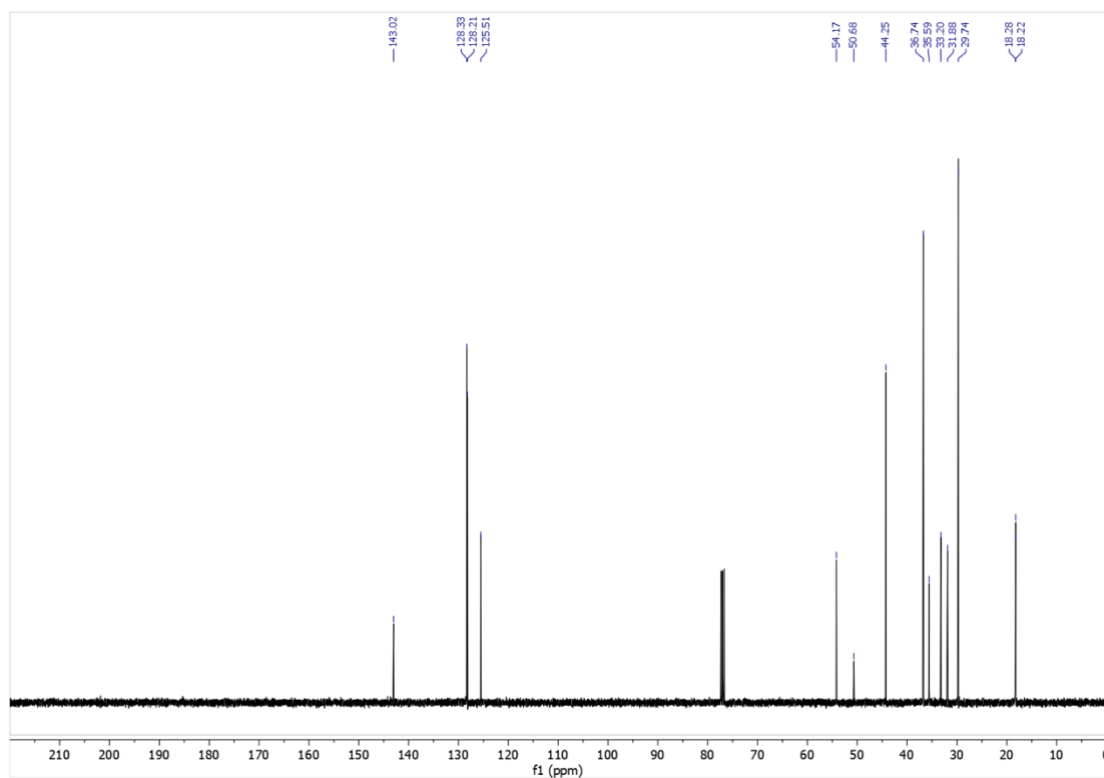

**N-(4-Methyl-1-phenylpentan-3-yl)aniline (7a)**

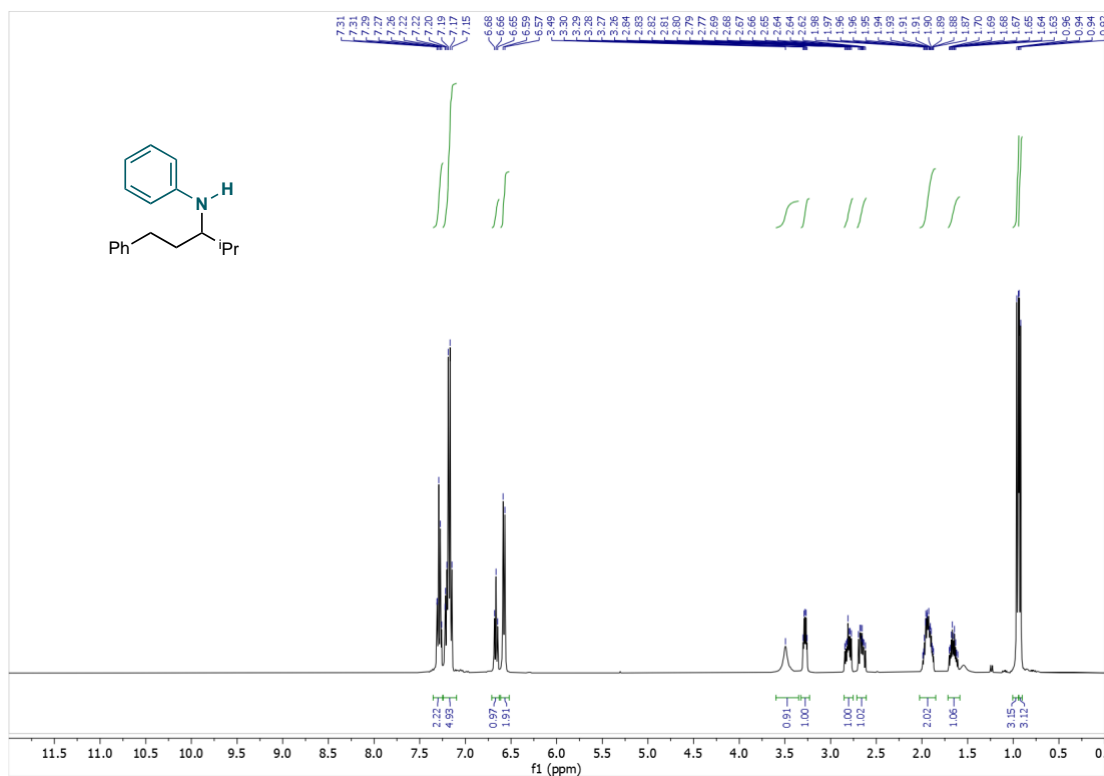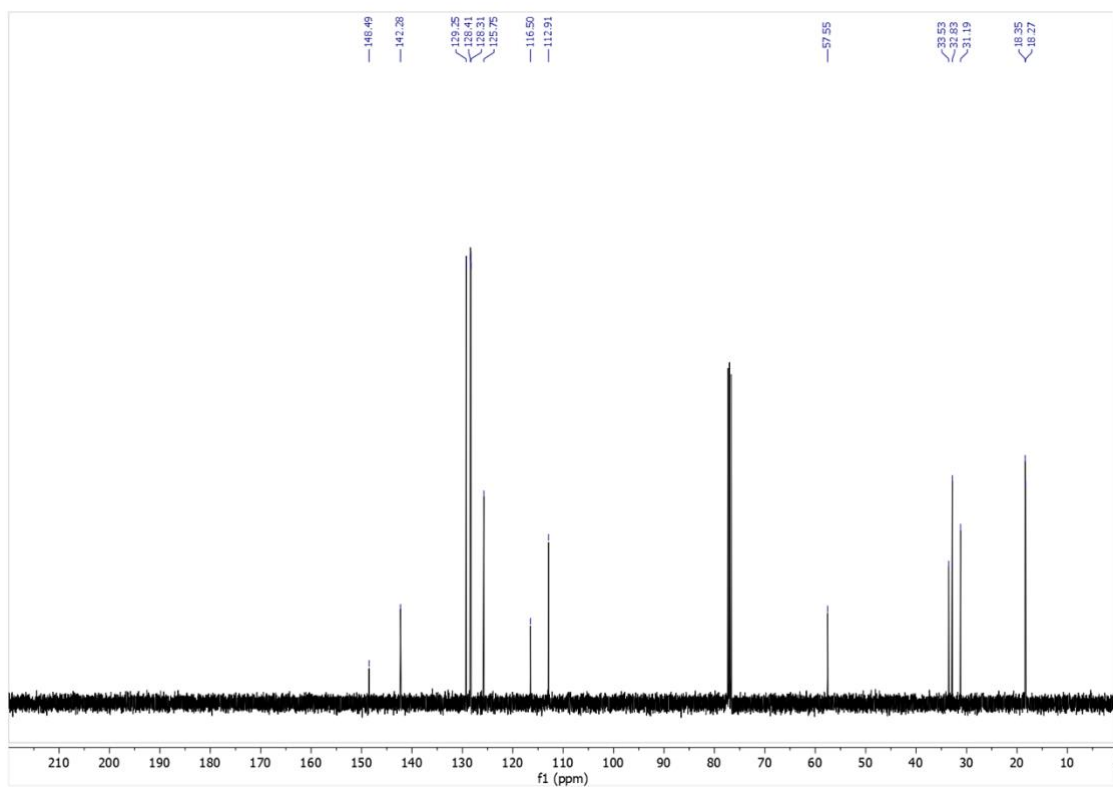

### 4-Iodo-N-(4-methyl-1-phenylpentan-3-yl)aniline (7b)

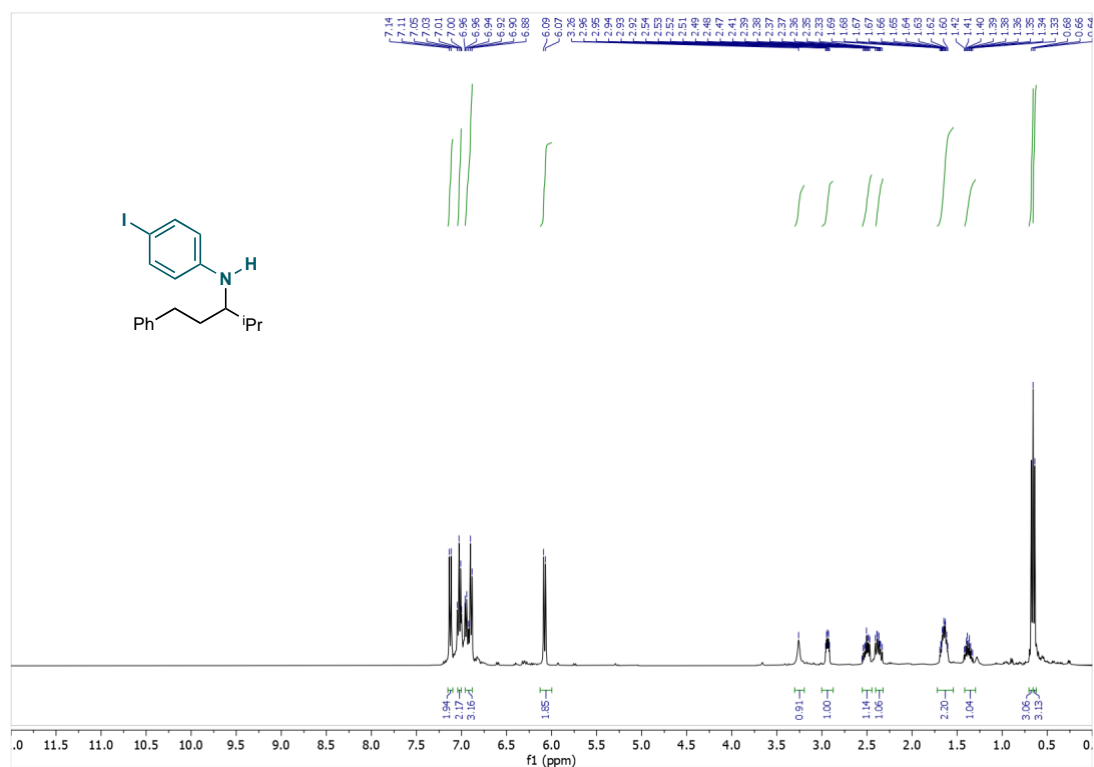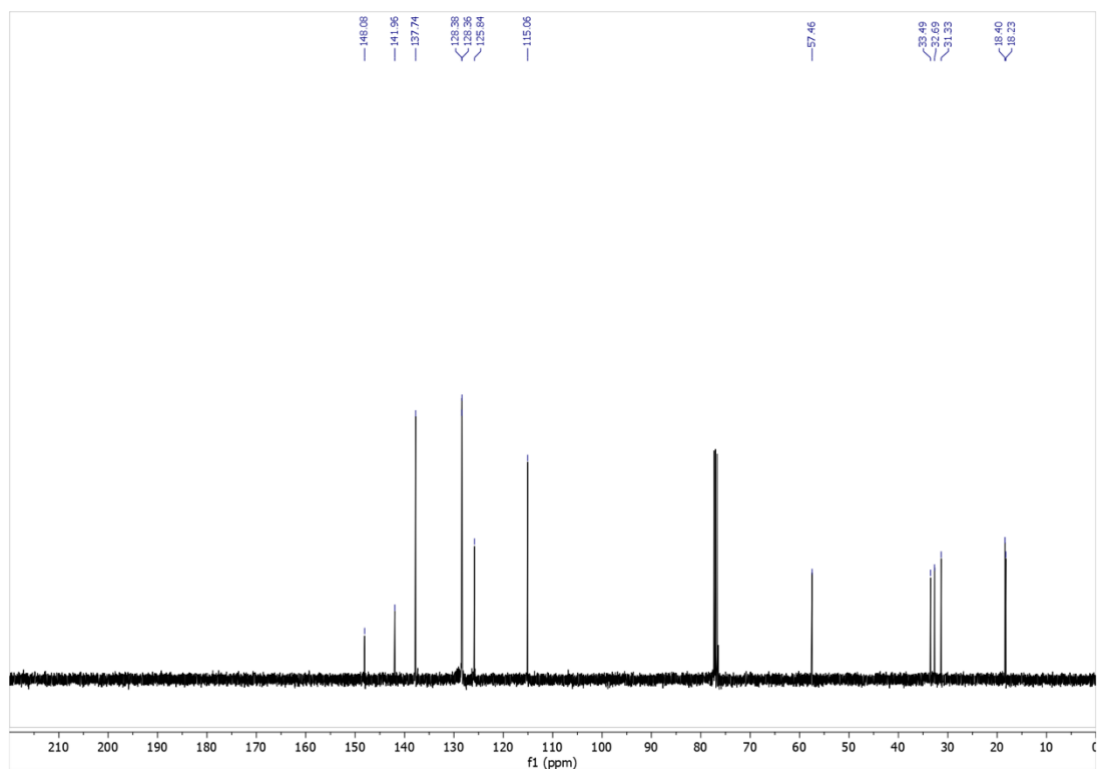

4-Methoxy-N-(4-methyl-1-phenylpentan-3-yl)aniline (7c)

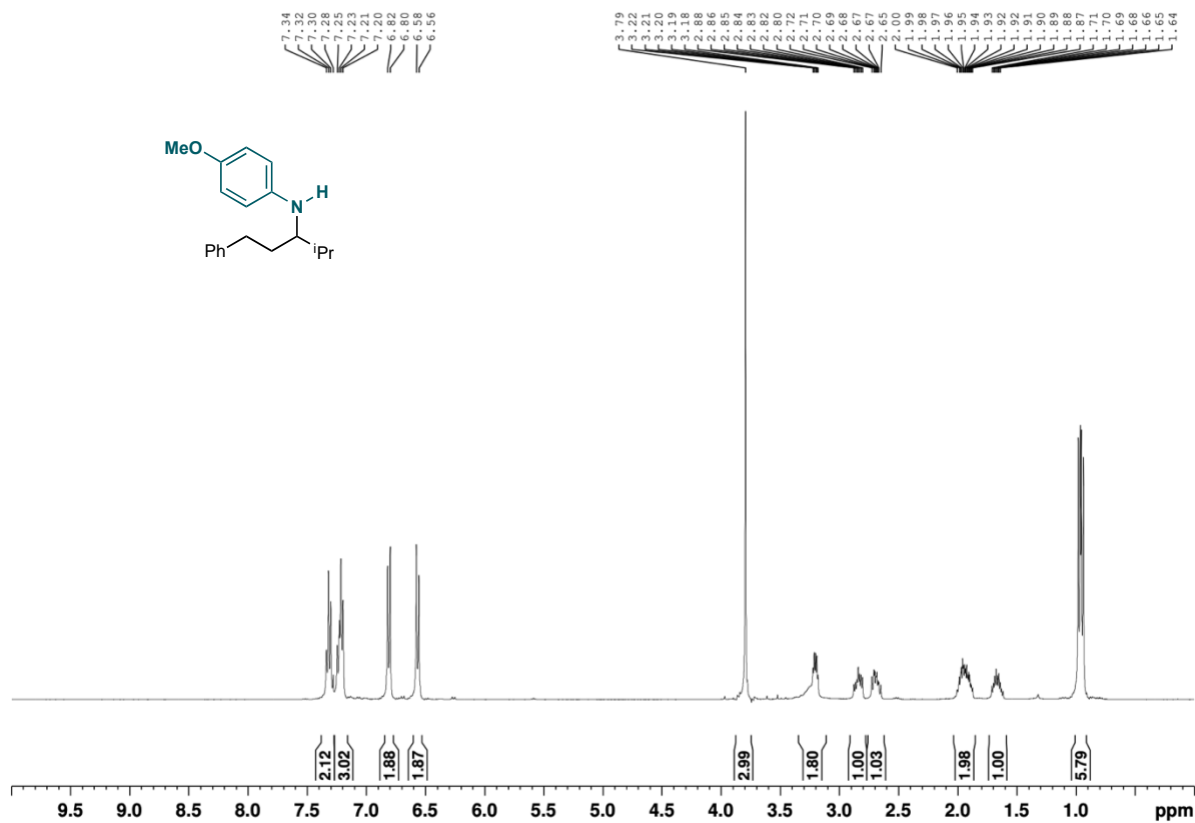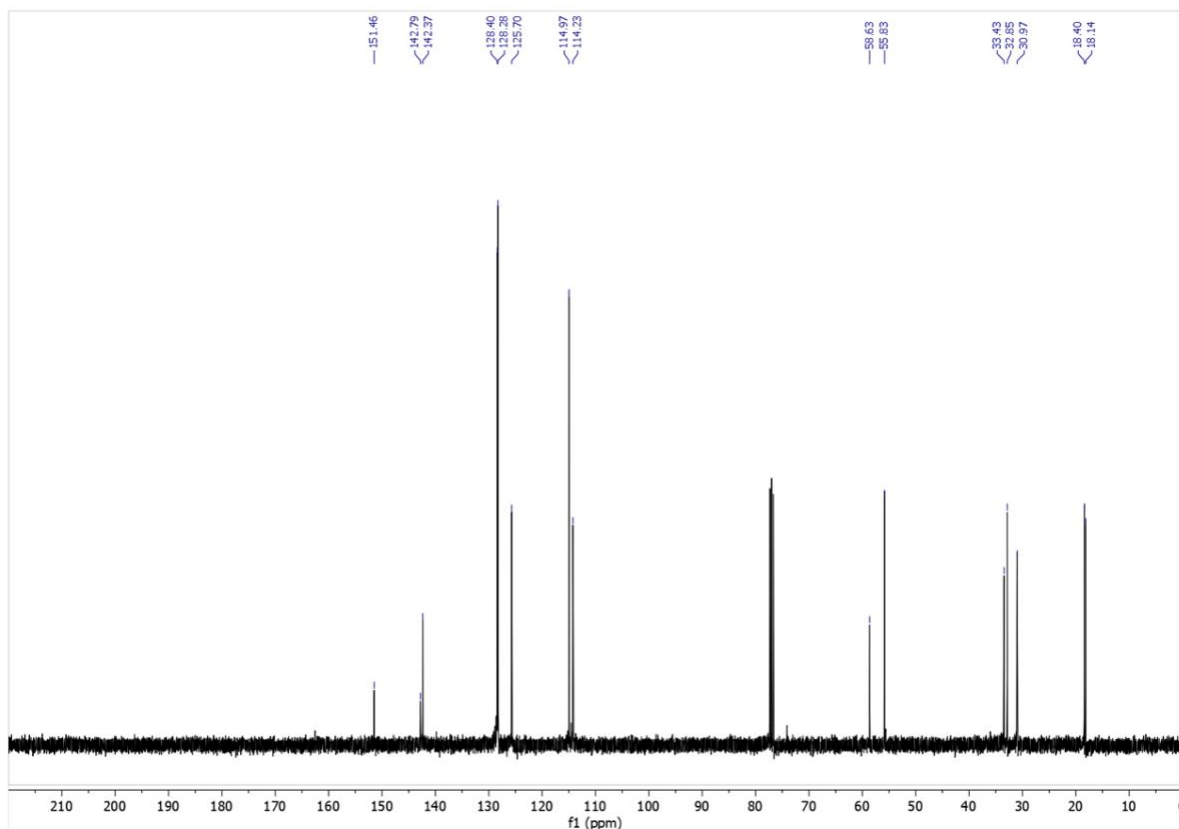

### 2,4,6-trimethyl-N-(4-methyl-1-phenylpentan-3-yl)aniline (7d)

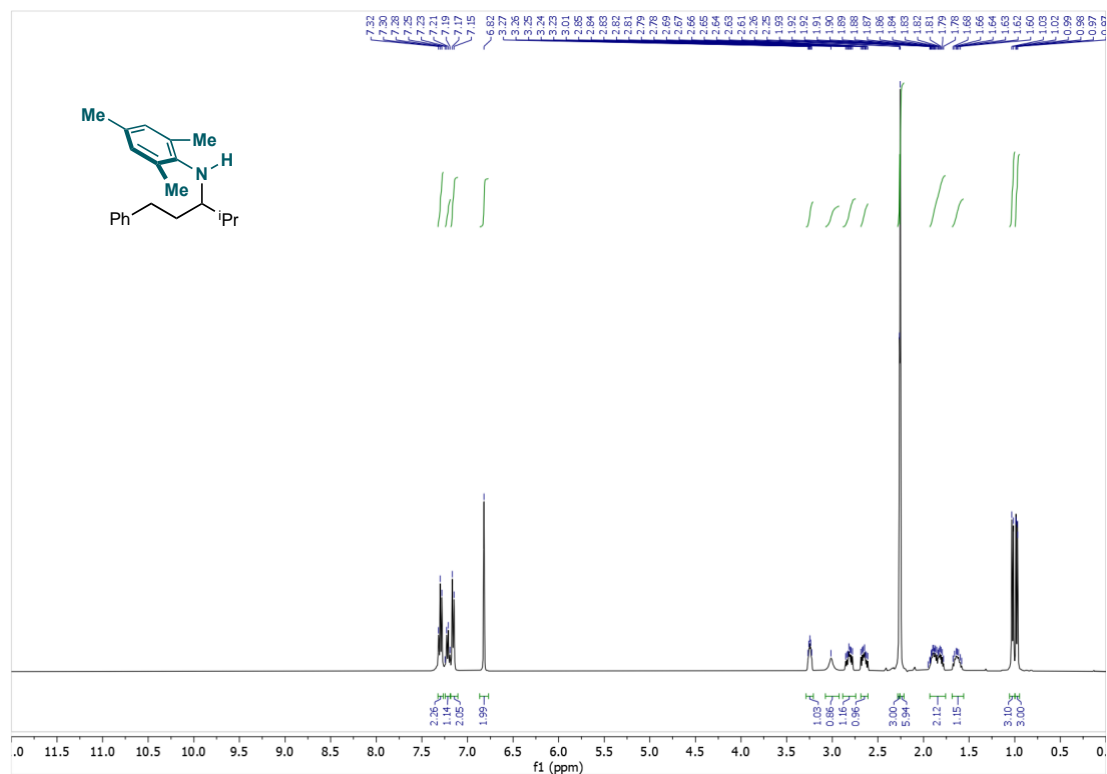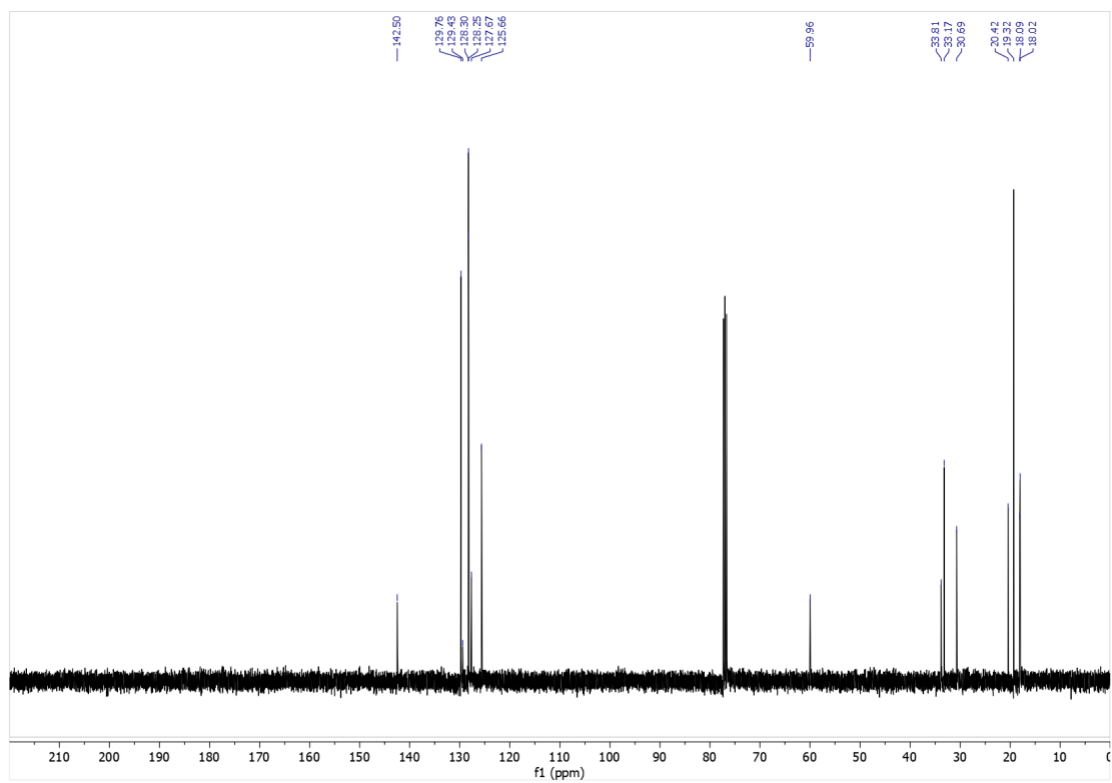

**(1S,4S)-4-(3,4-Dichlorophenyl)-N-methyl-N-(4-methyl-1-phenylpentan-3-yl)-1,2,3,4-tetrahydronaphthalen-1-amine (8a) major isomer**

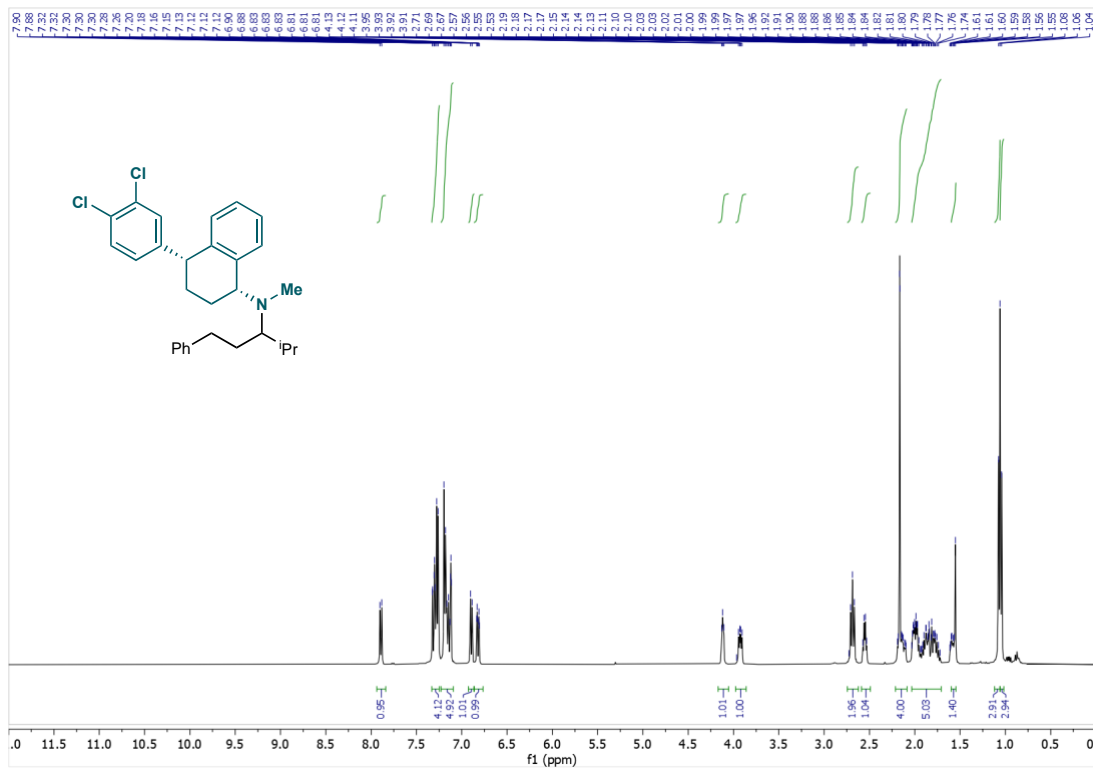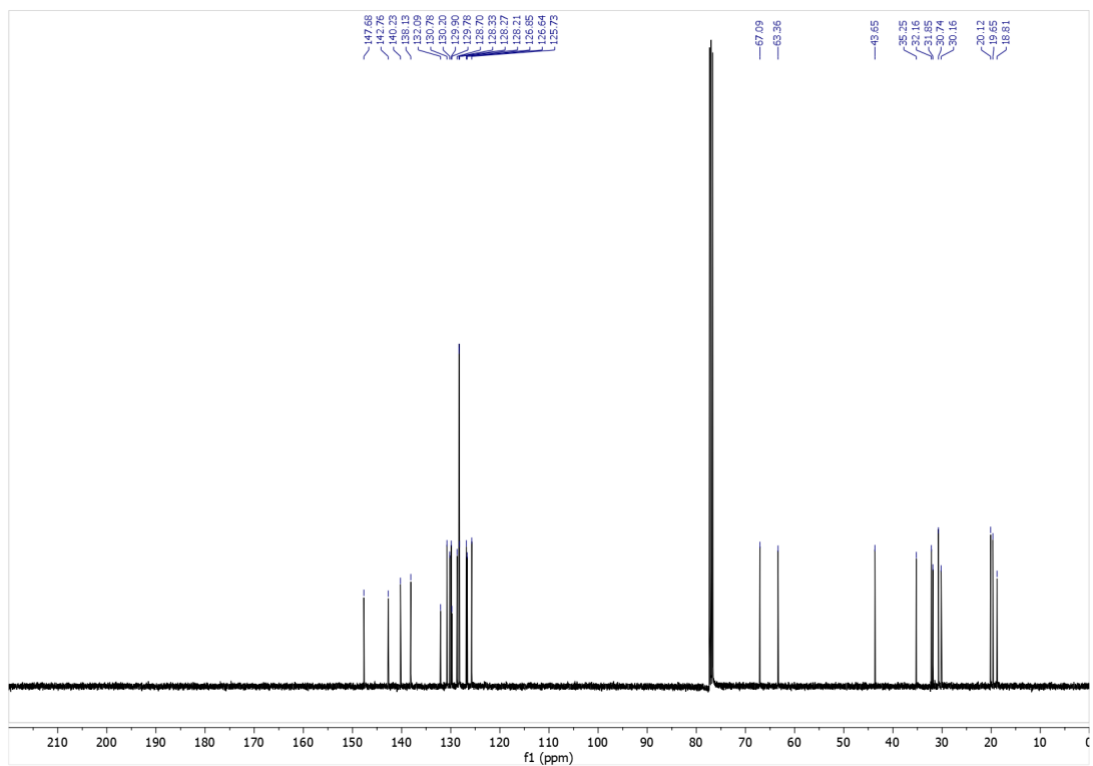



**(1S,4S)-4-(3,4-Dichlorophenyl)-N-methyl-N-(4-methyl-1-phenylpentan-3-yl)-1,2,3,4-tetrahydronaphthalen-1-amine (8a) minor isomer**

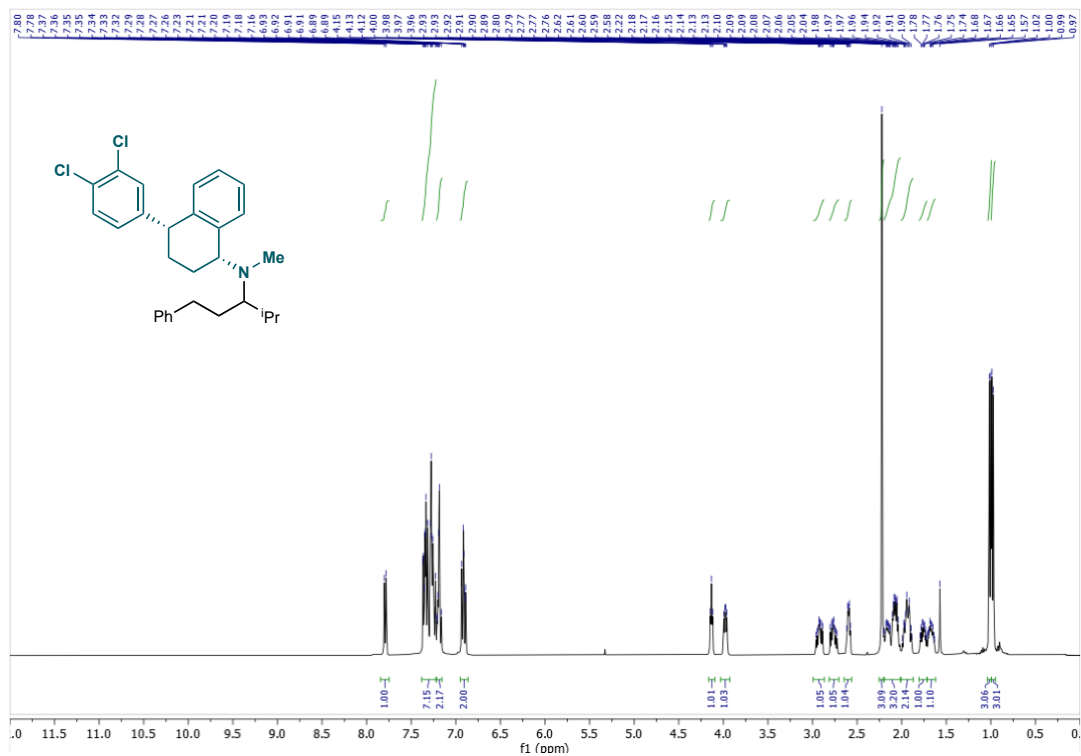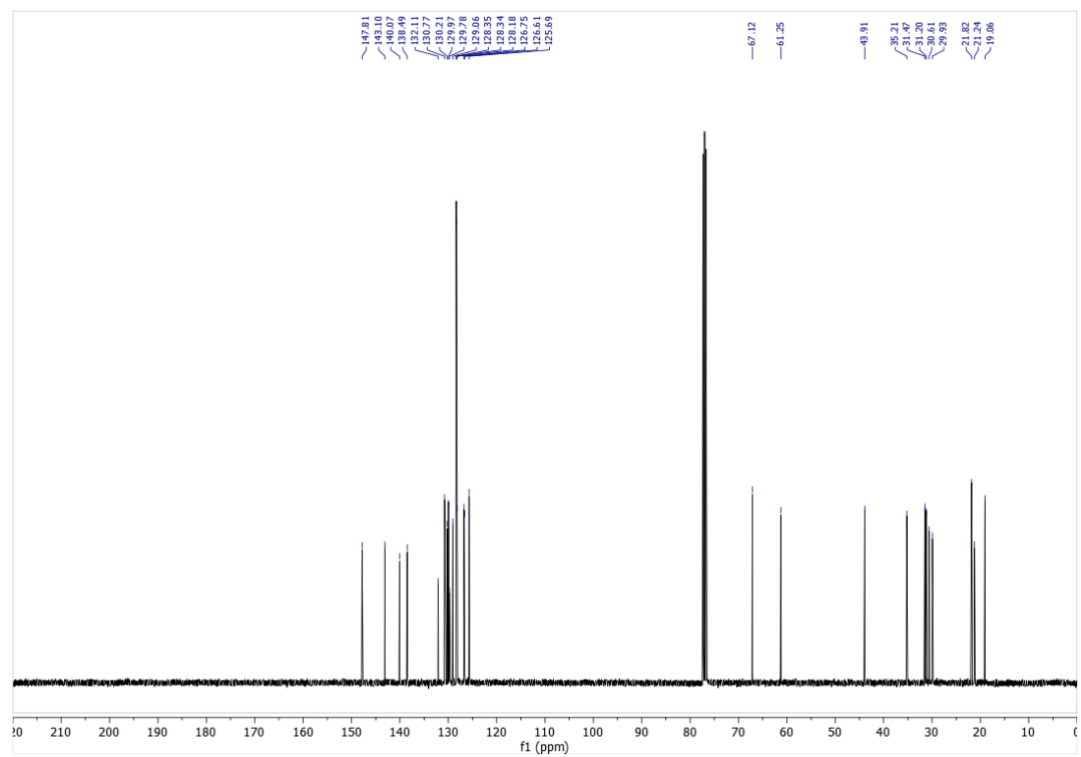

11-(4-(4-Methyl-1-phenylpentan-3-yl)piperazin-1-yl)dibenzo[b,f][1,4]thiazepine (8b)

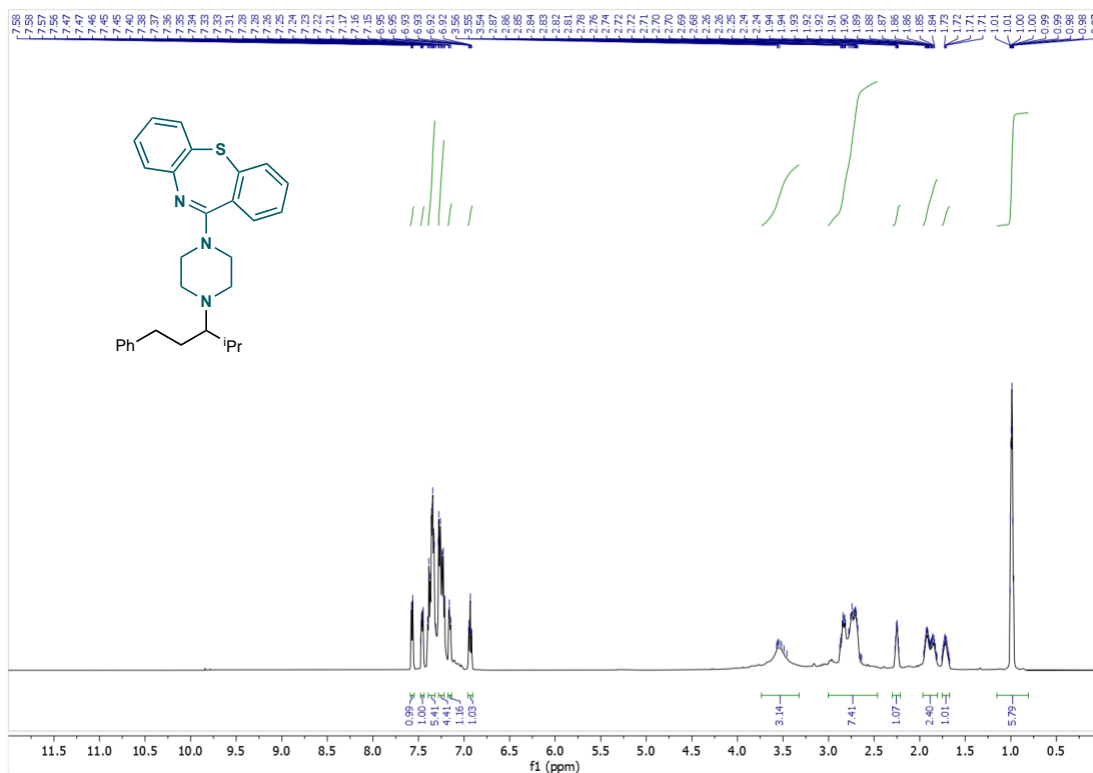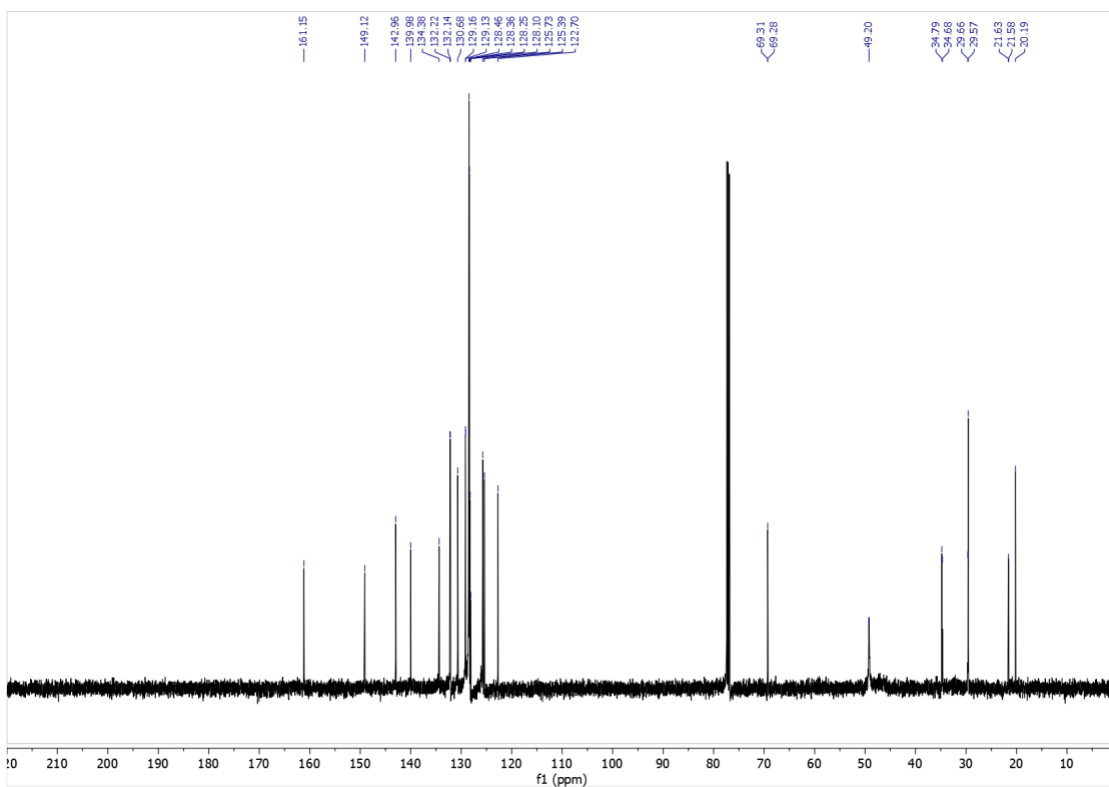

**Ethyl 1-cyclopropyl-6-fluoro-7-(4-(4-methyl-1-phenylpentan-3-yl)piperazin-1-yl)-4-oxo-1,4-dihydroquinoline-3-carboxylate (8c)**

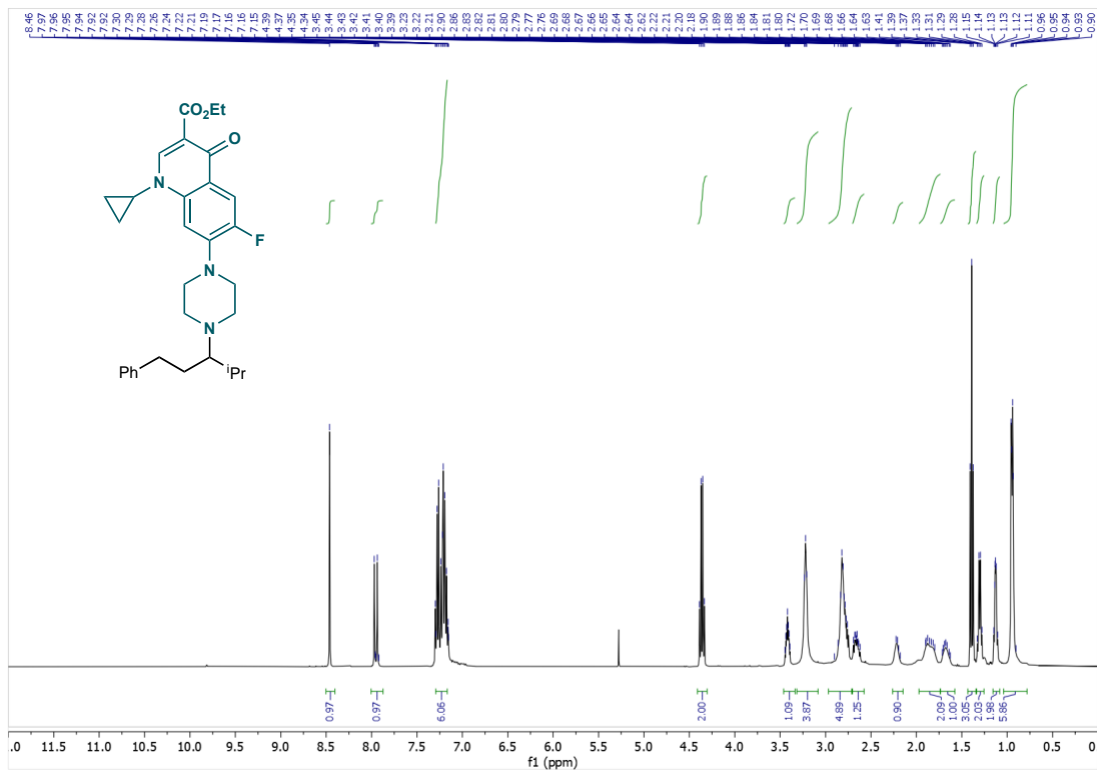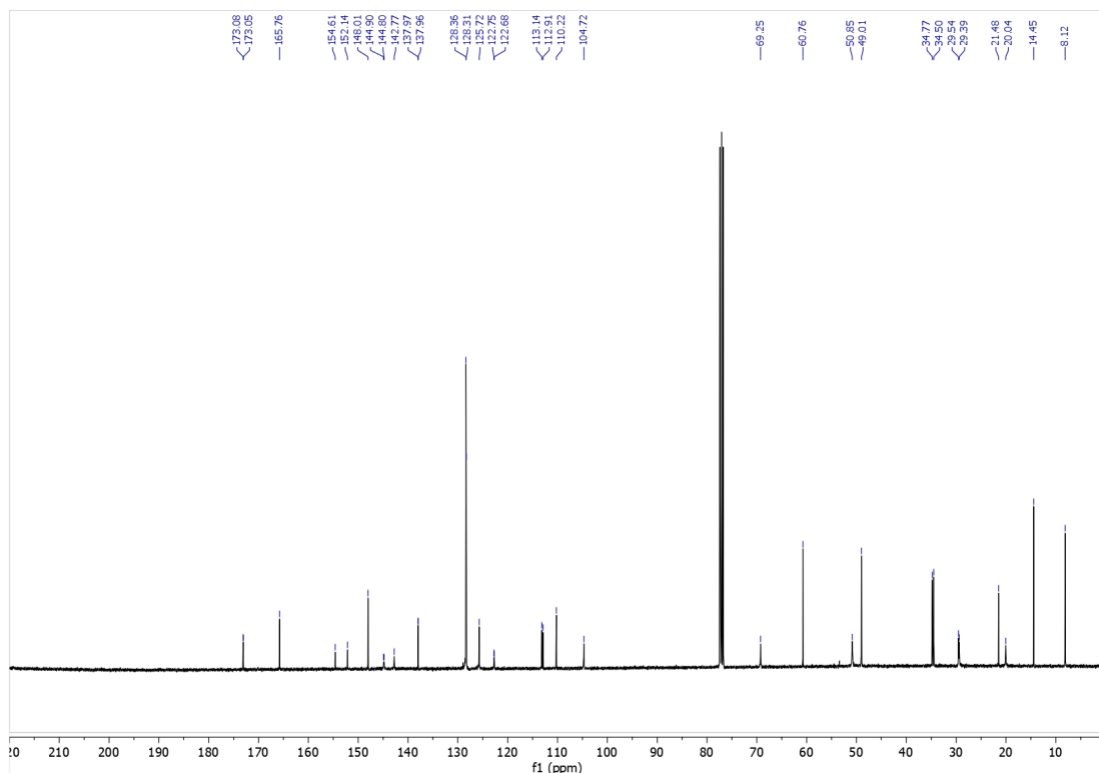

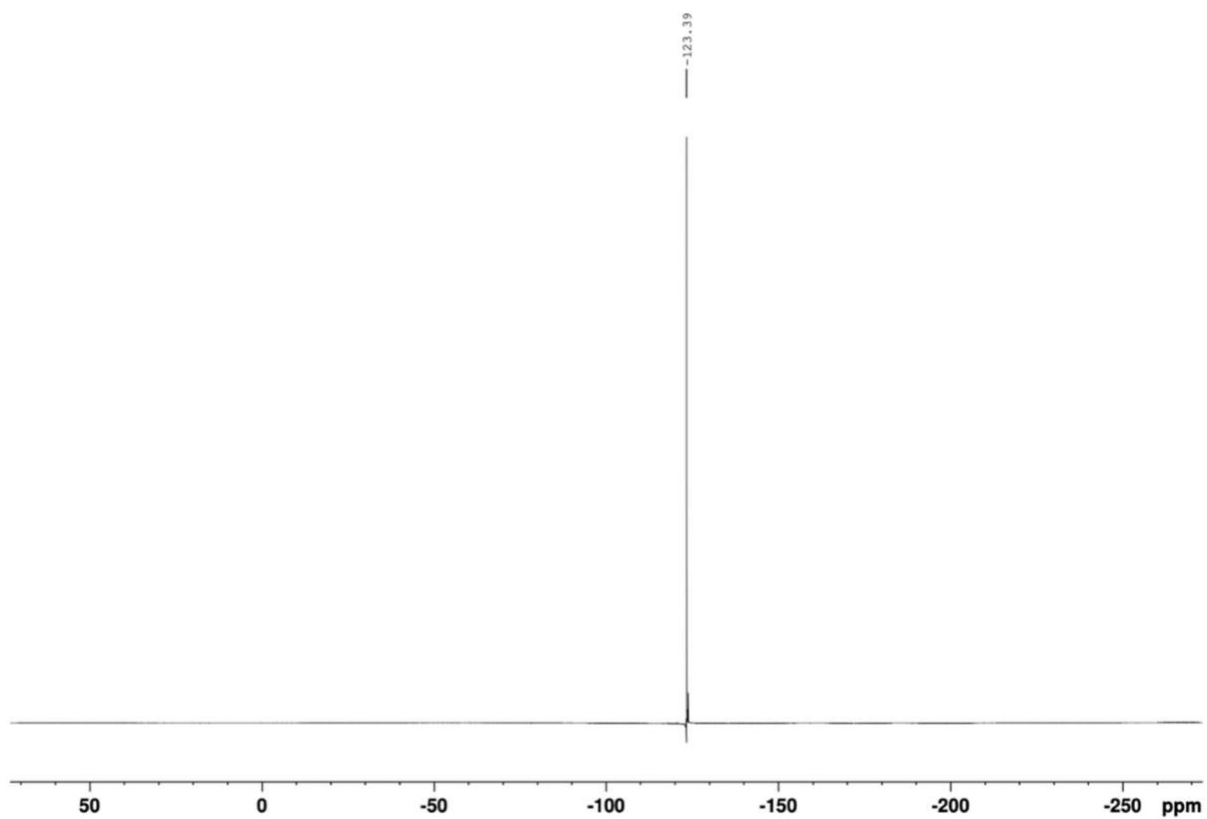

**Diethyl-4-(6-chlorocyclohexa-1,2,3,5-tetraen-1-yl)-2-methyl-6-((2-((4-methyl-1-phenylpentan-3-yl)amino)ethoxy)methyl)-1,4-dihydropyridine-3,5-dicarboxylate (8d)**

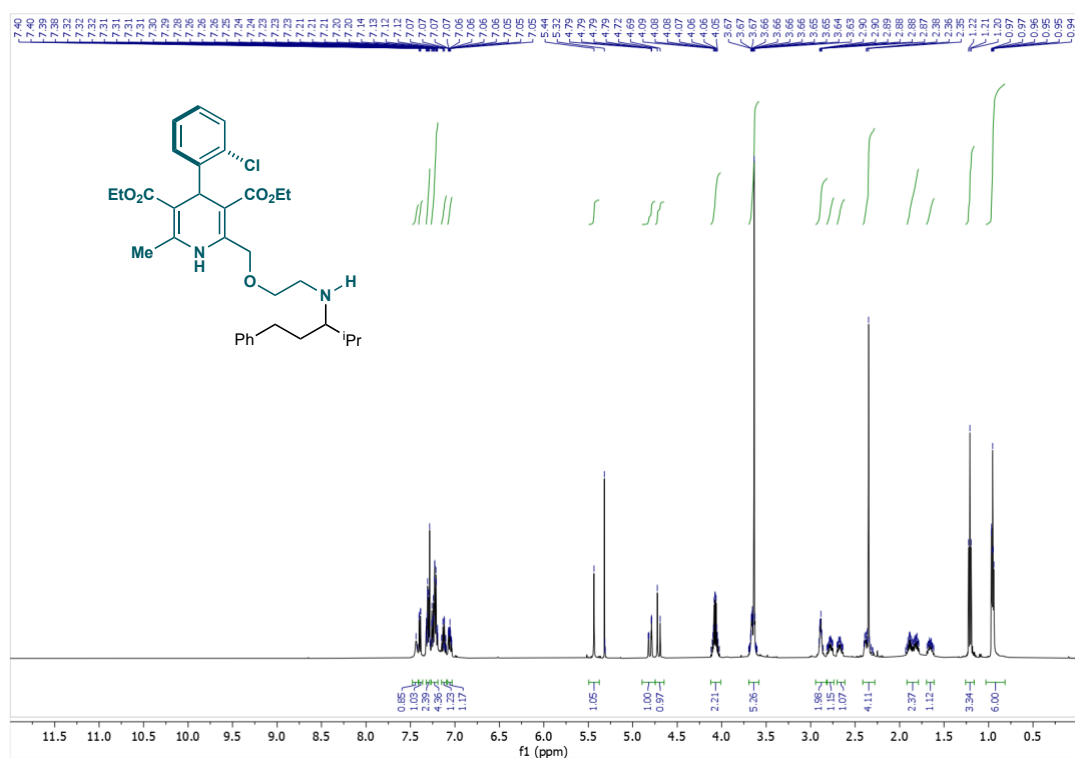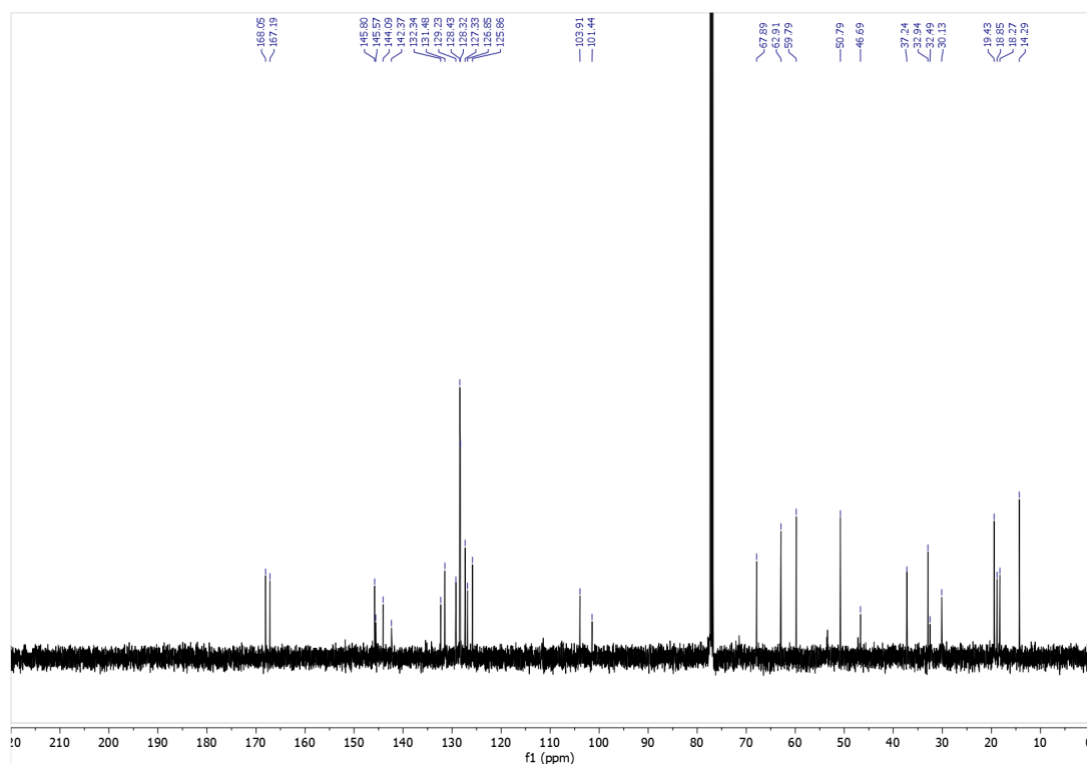

**N-benzyl-N,2-dimethyltridec-12-en-3-amine (9a)**

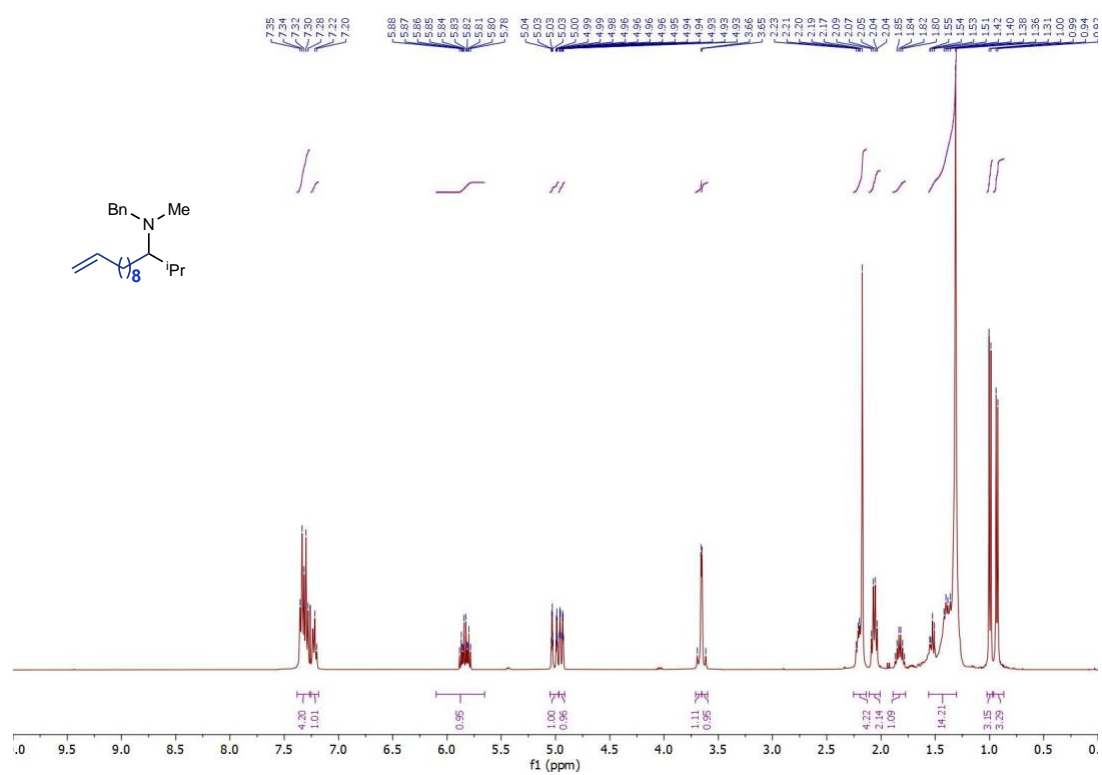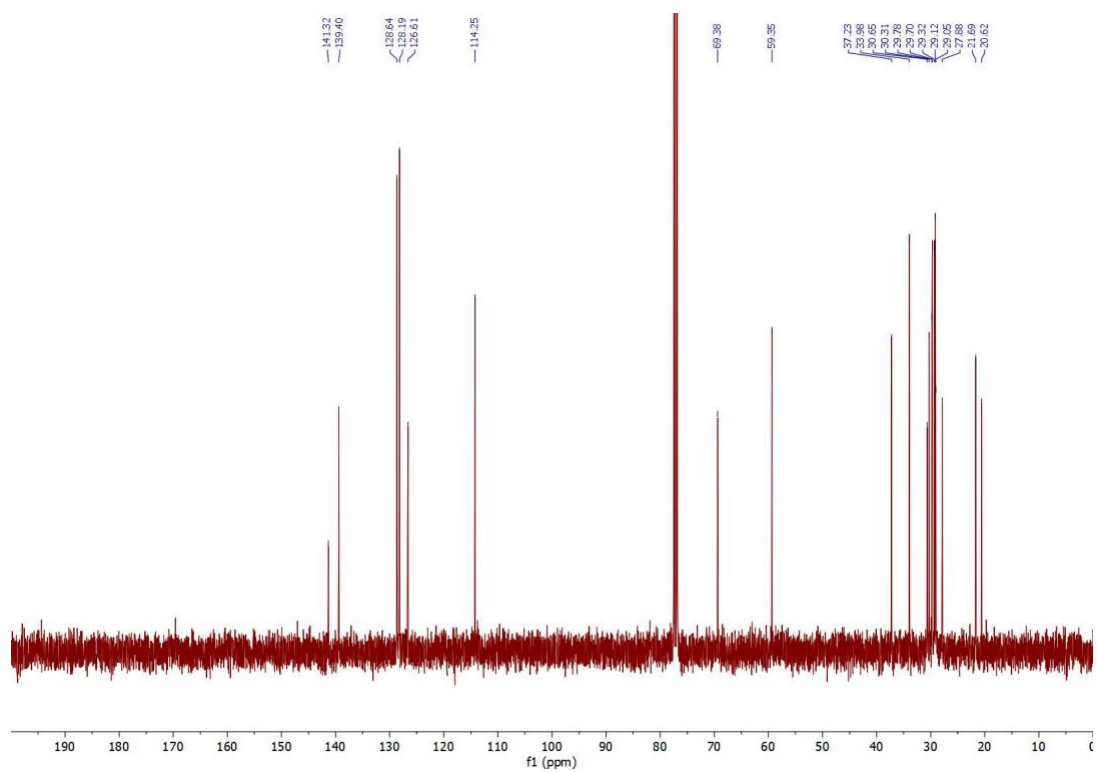

# Ethyl 6-(benzyl(methyl)amino)-7-methyloctanoate (9b)

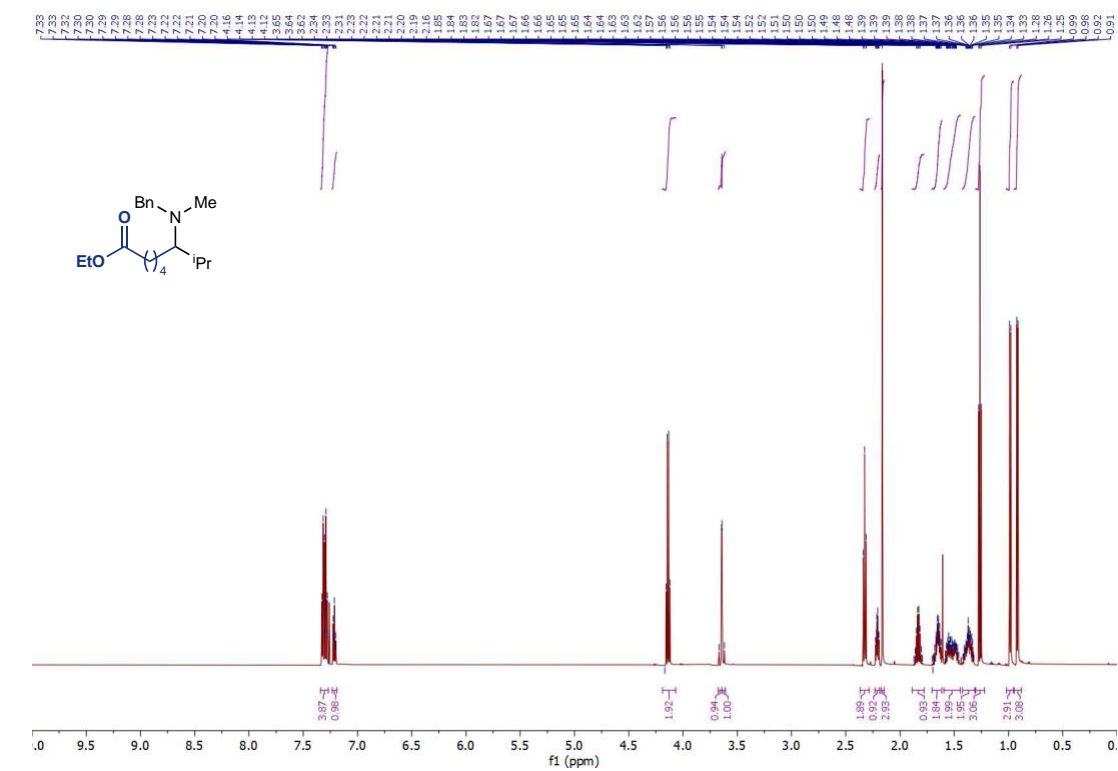

**6-(1,2,3,4-tetrahydro-9H-carbazol-9-yl)hexanal (9c -precursor 1)**

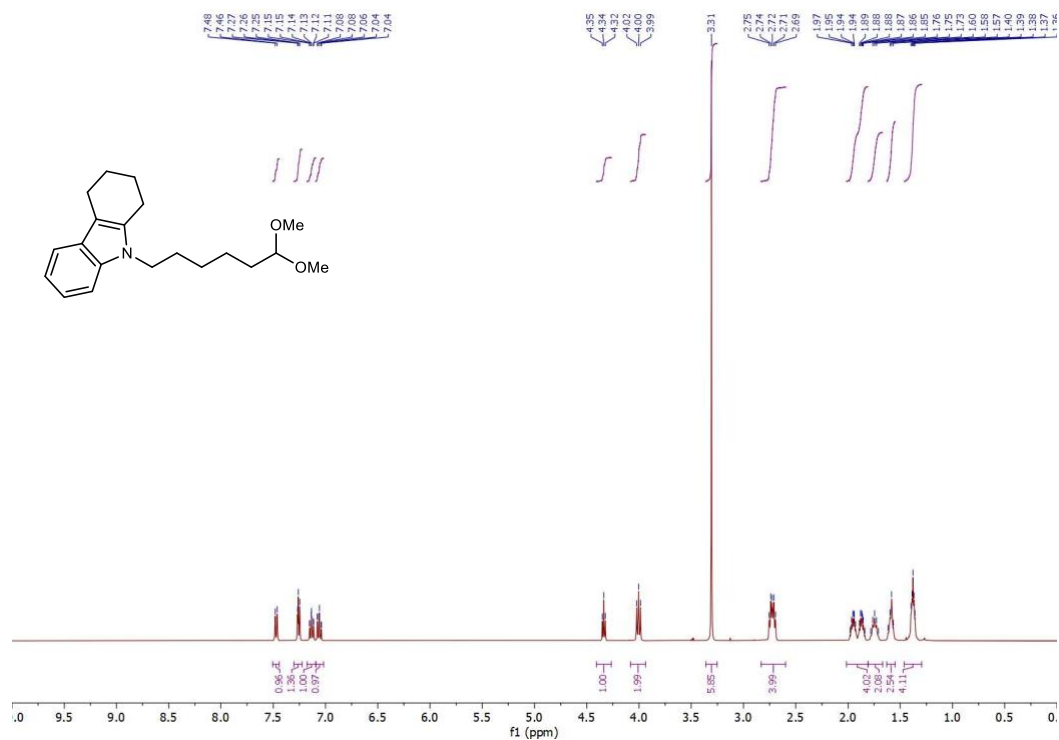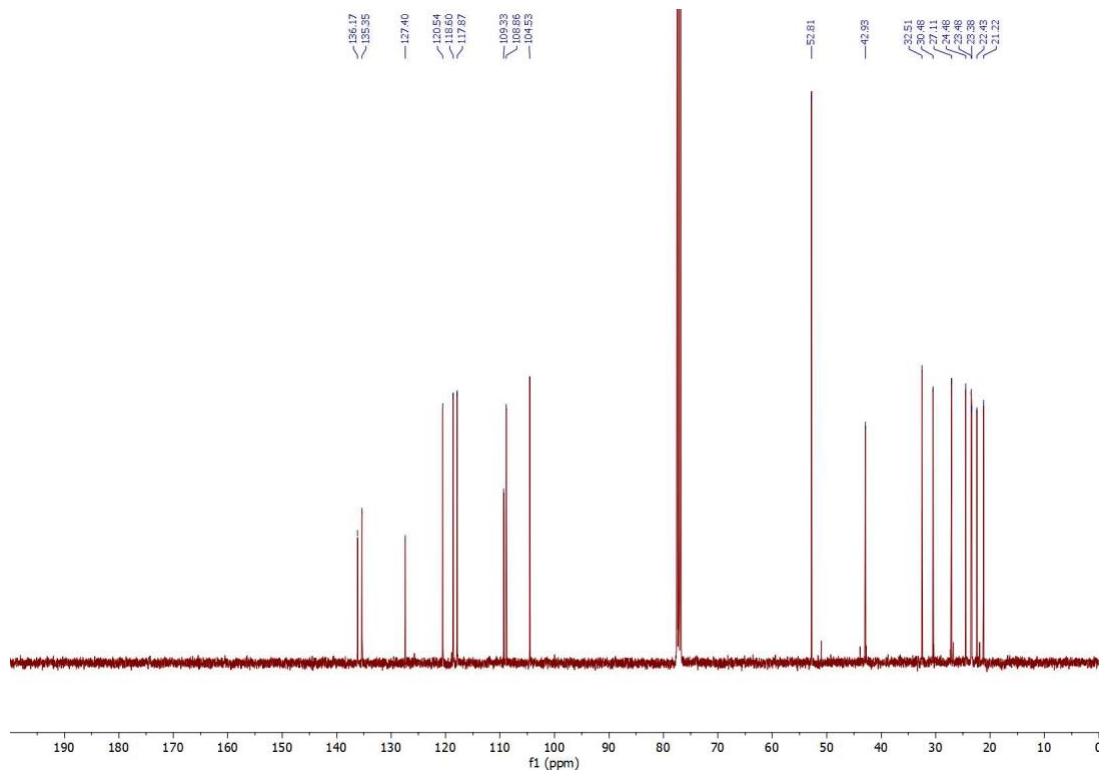



9-(6,6-dimethoxyhexyl)-2,3,4,9-tetrahydro-1H-carbazole (9c -aldehyde)

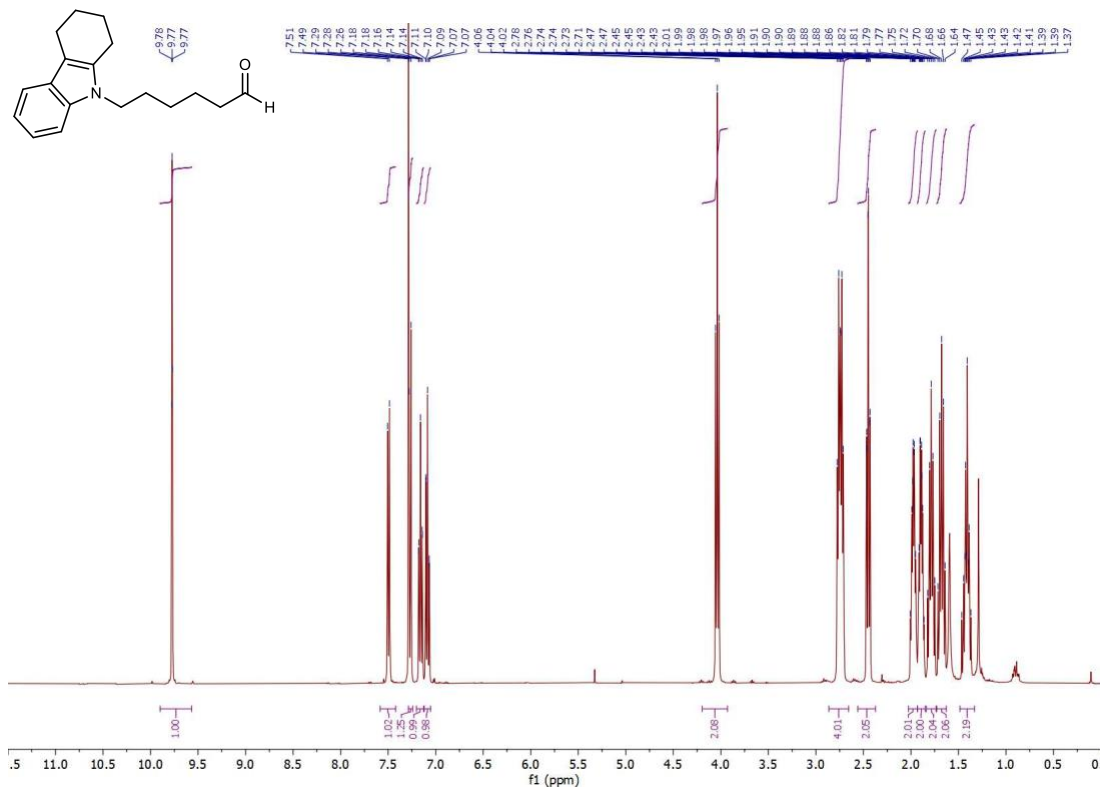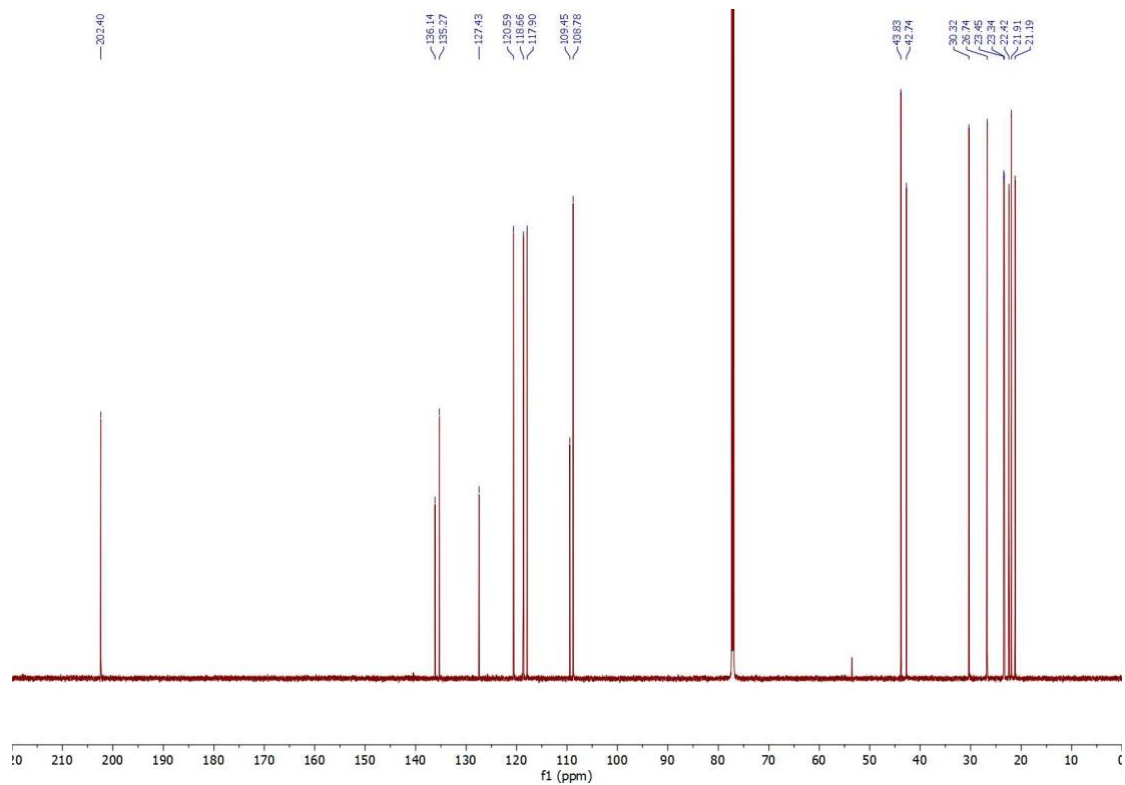

**N-benzyl-N,2-dimethyl-8-(1,2,3,4-tetrahydro-9H-carbazol-9-yl)octan-3-amine (9c)**

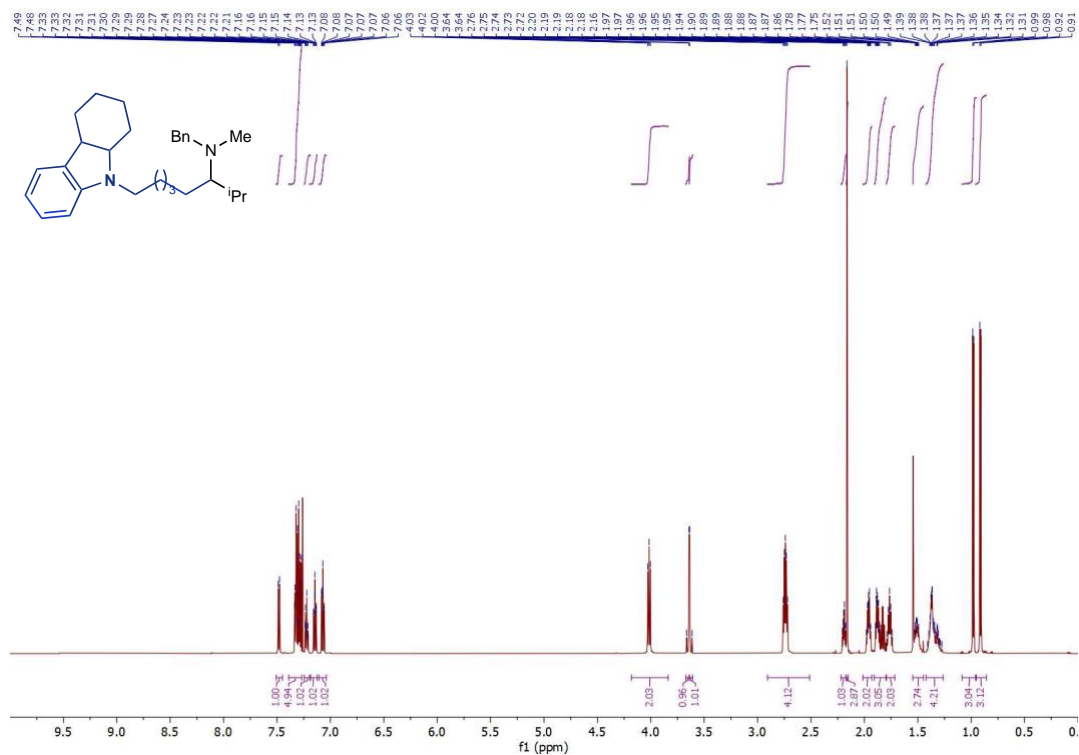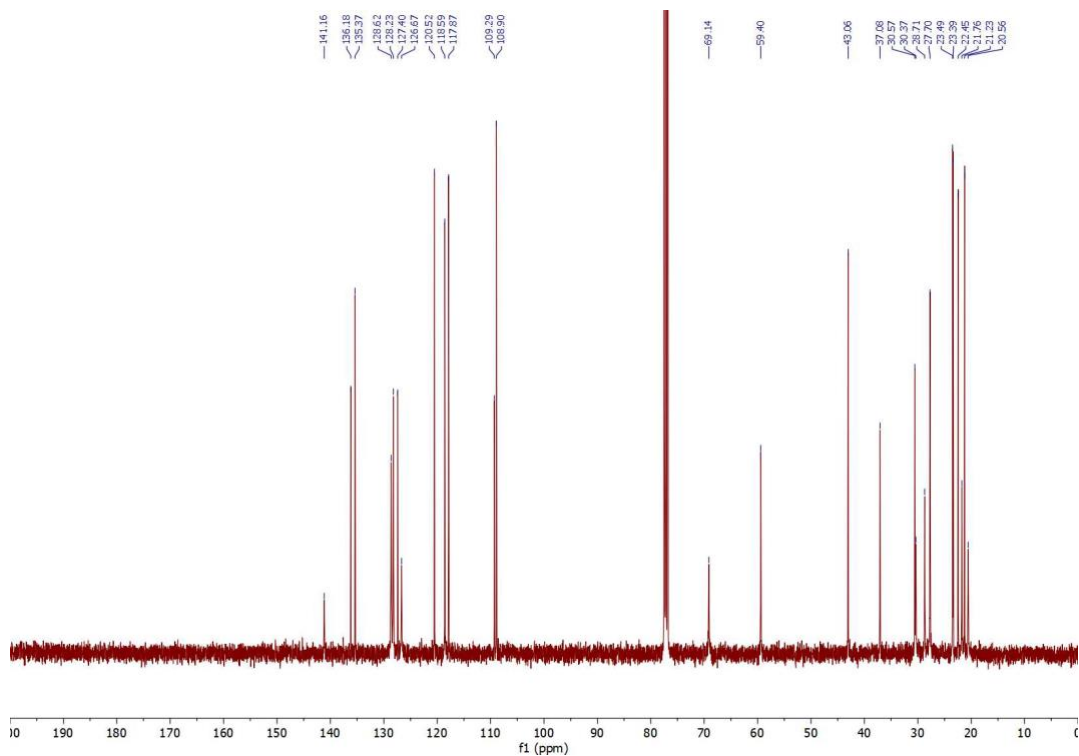

**Benzyl 4-(2-(benzyl(methyl) amino)-3-methylbutyl)piperidine-1-carboxylate (9d)**

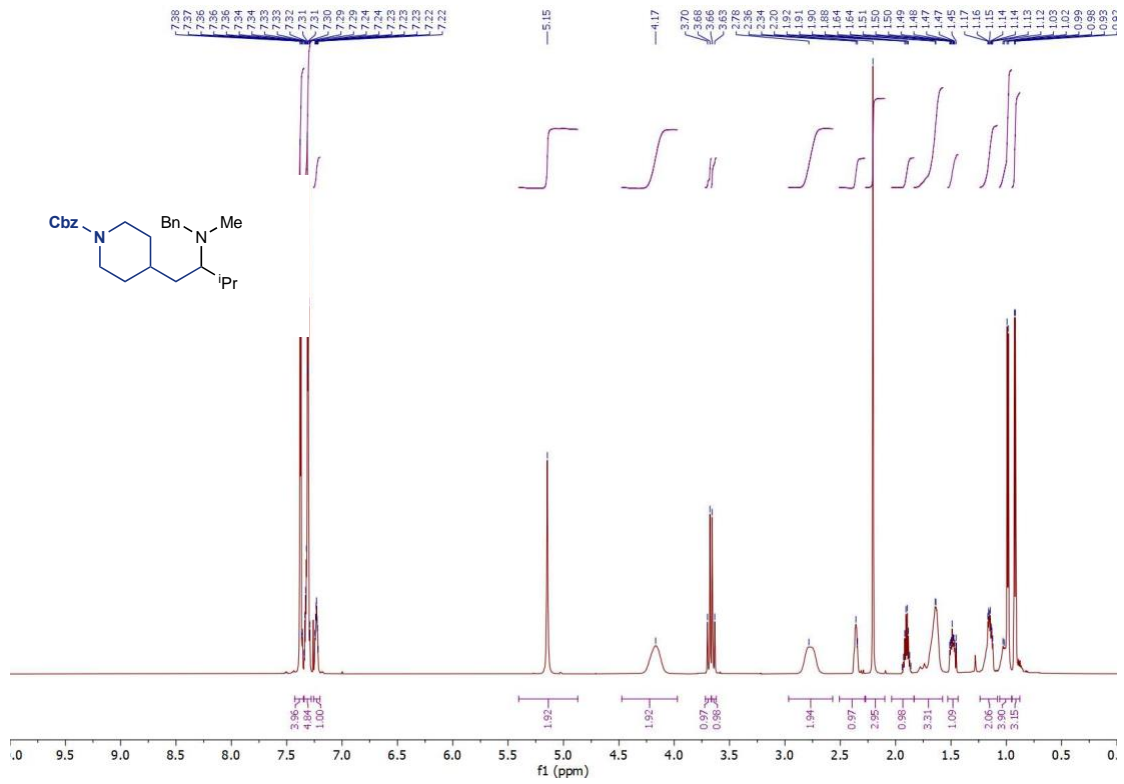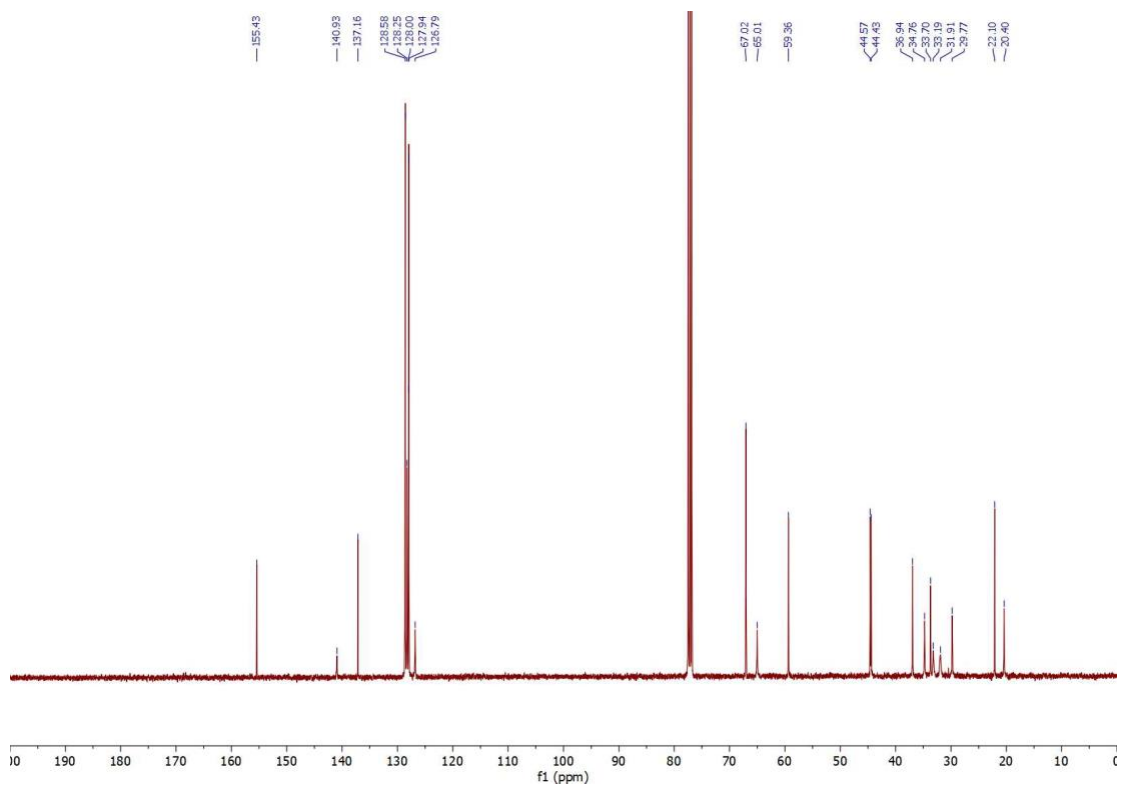

**N-benzyl-N,2,5-trimethylhexan-3-amine (9e)**

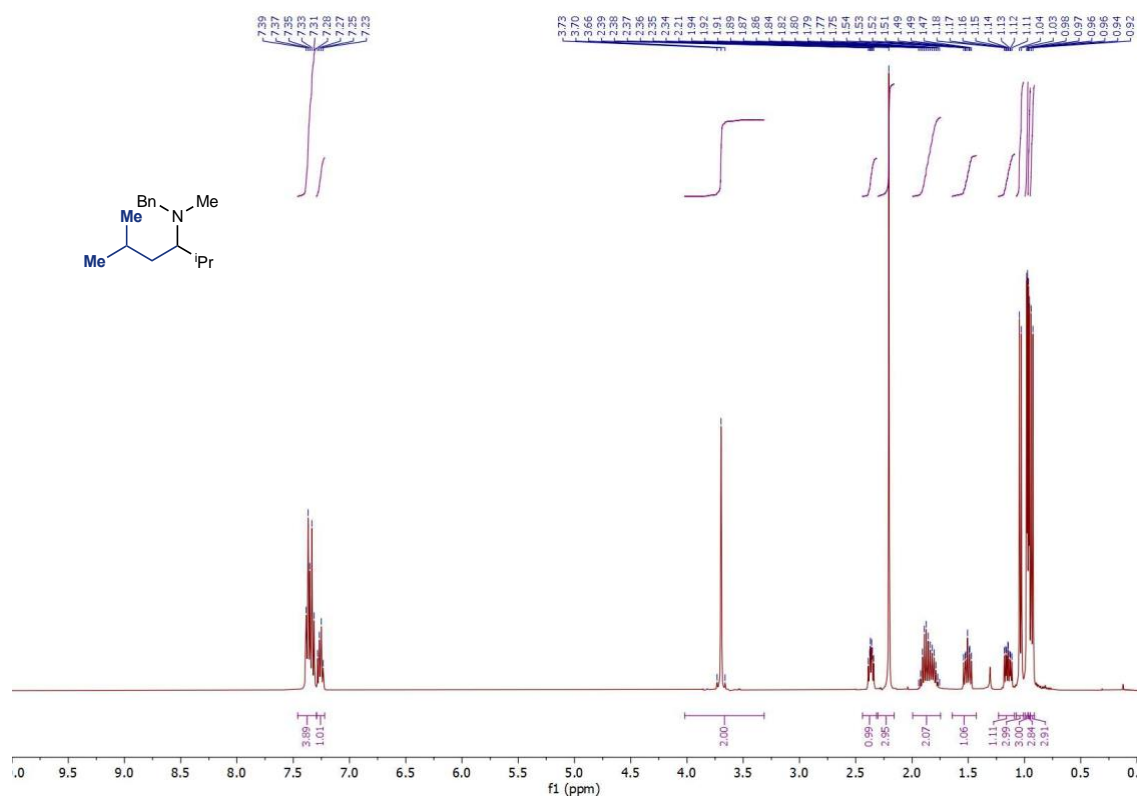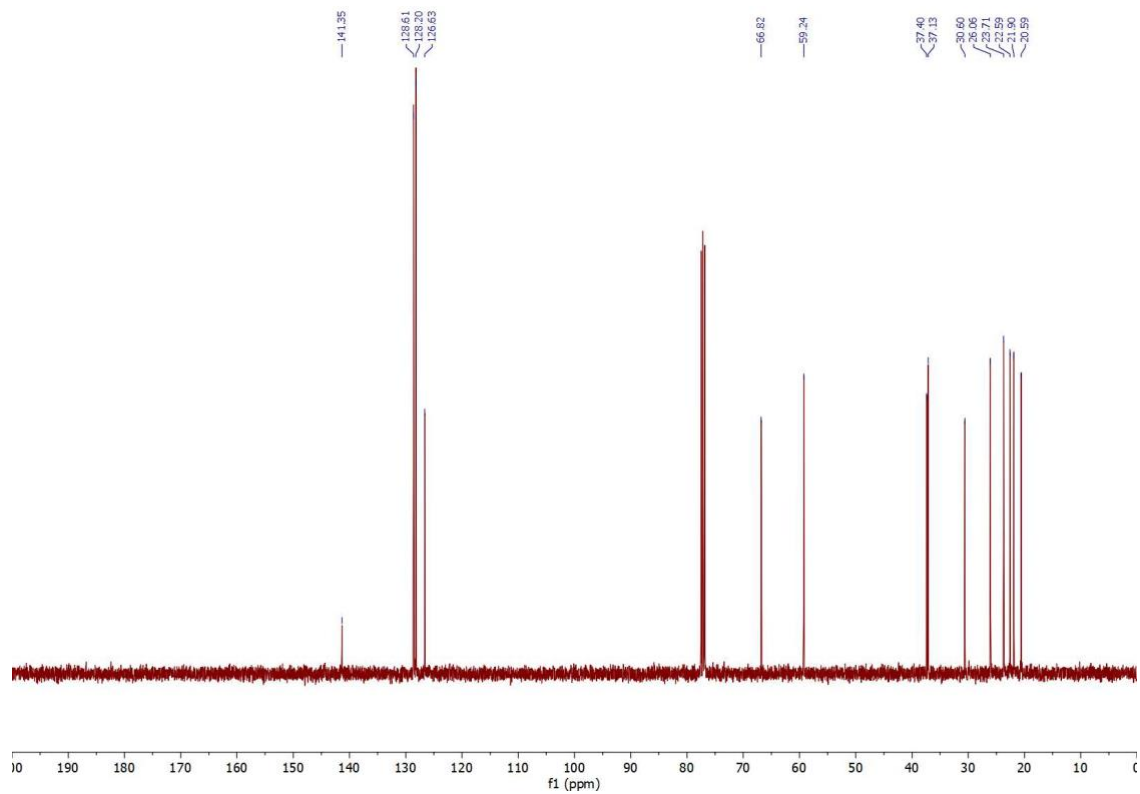

**N-benzyl-N,2,5,5-tetramethylhexan-3-amine (9f)**

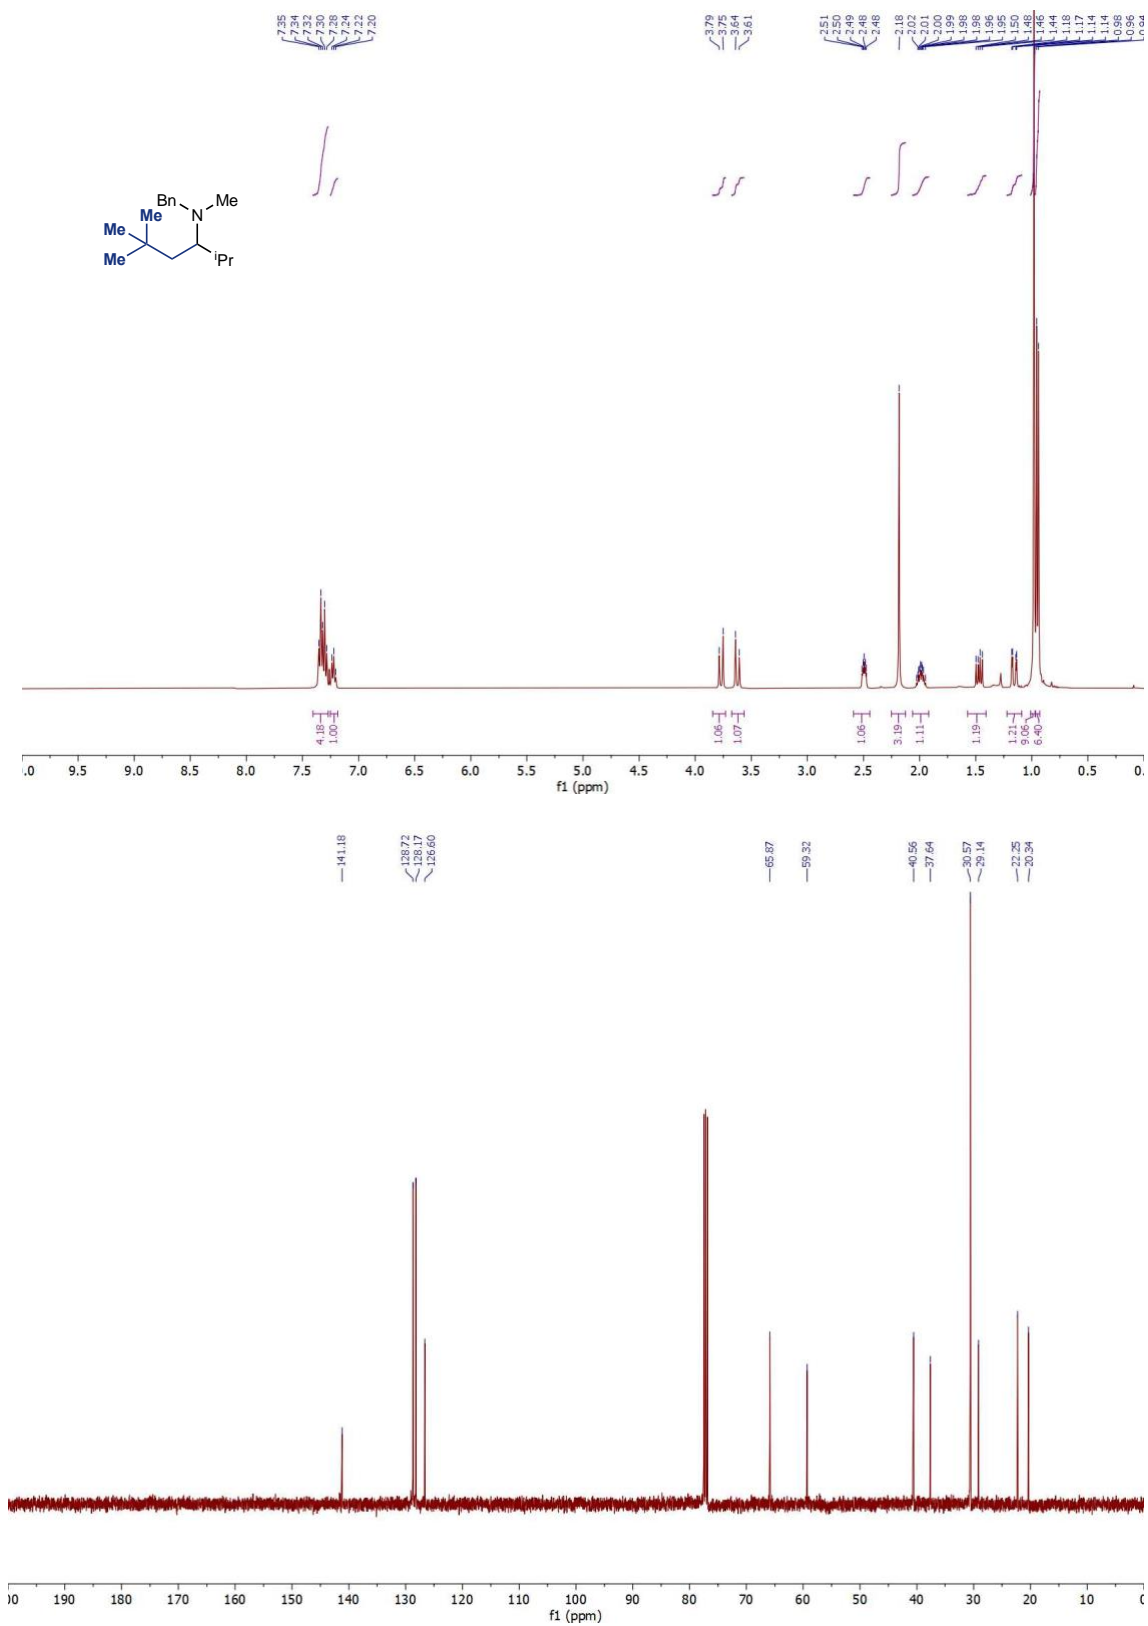

**N-benzyl-1-(cyclohex-3-en-1-yl)-N,2-dimethylpropan-1-amine (9h)**

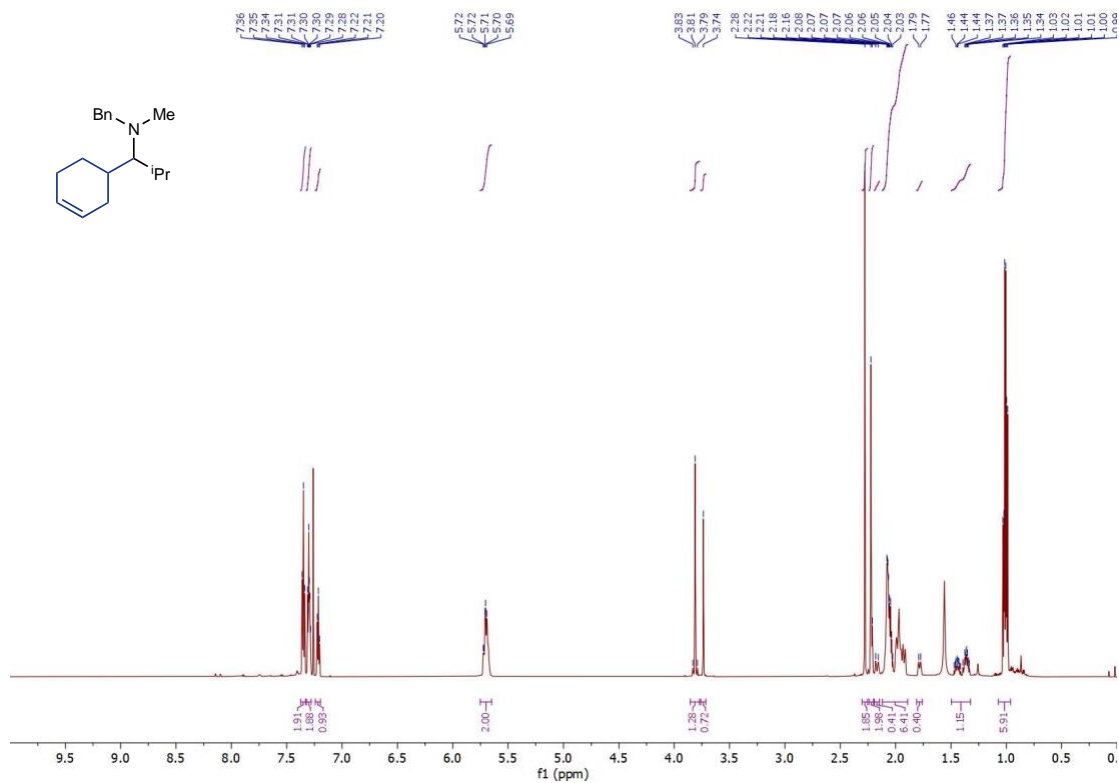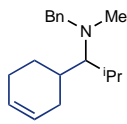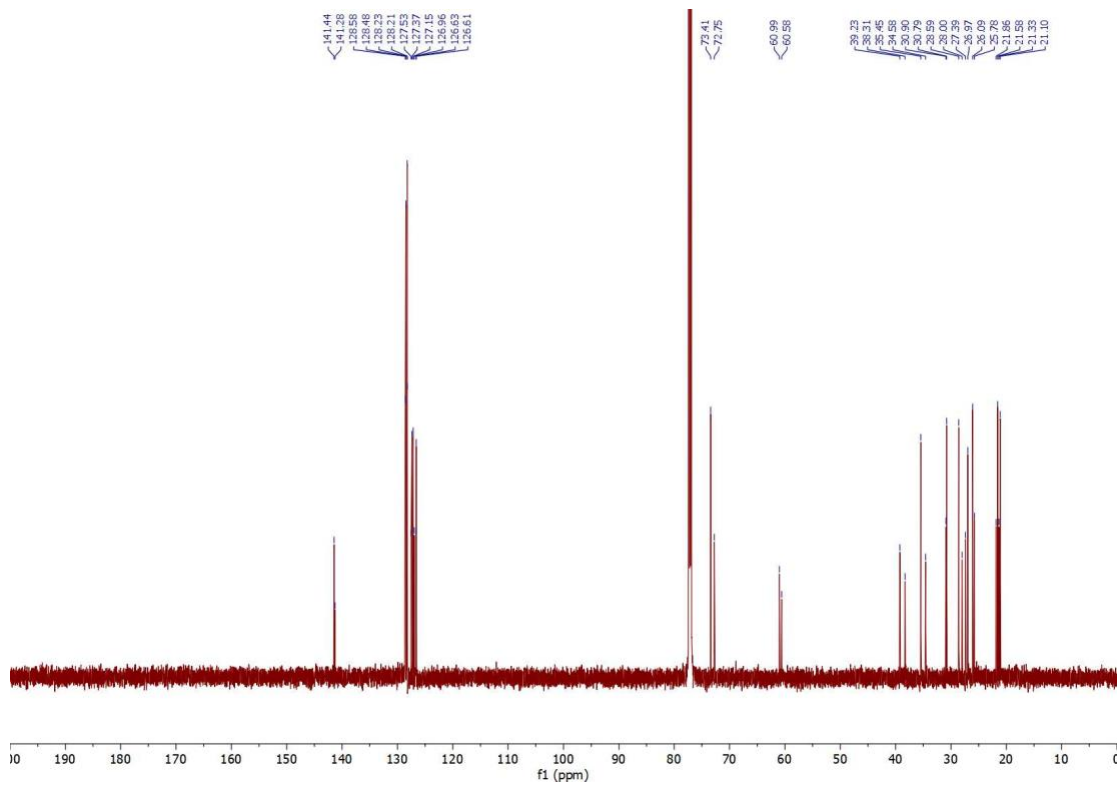

**N-benzyl-N,3-dimethyl-1-phenylbutan-2-amine (9j)**

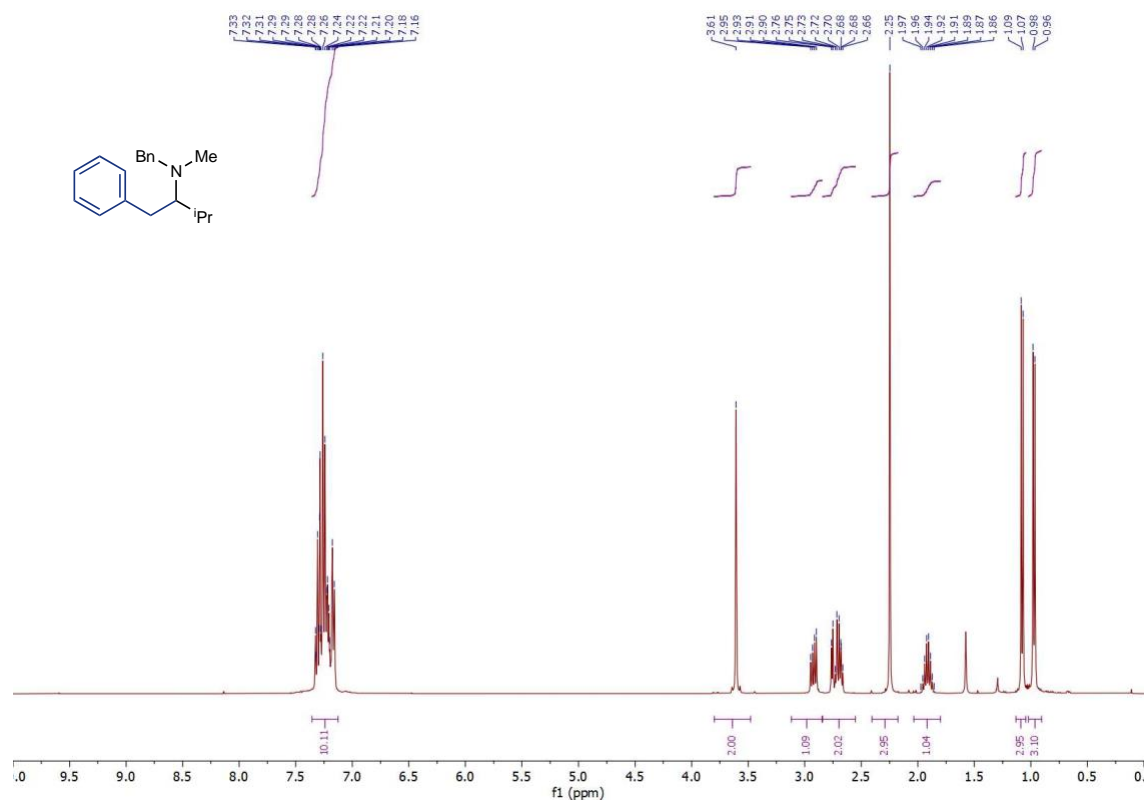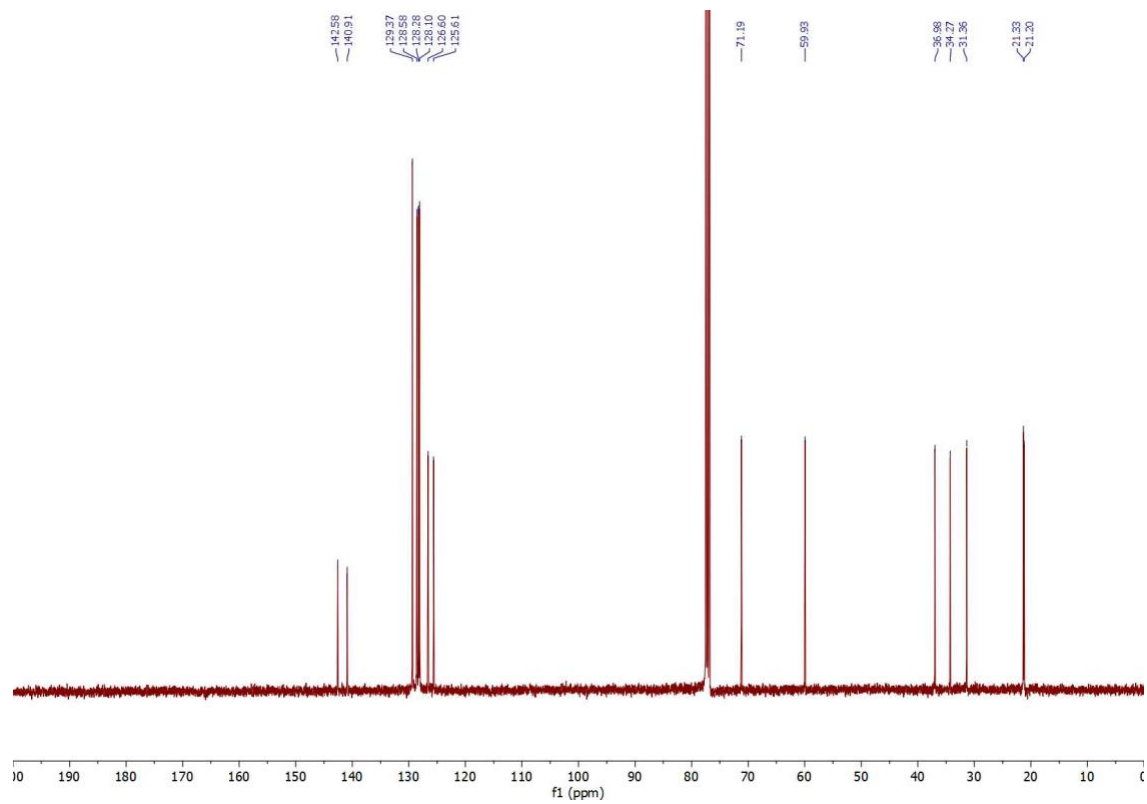

**N-benzyl-1-(3,4-dimethoxyphenyl)-N,3-dimethylbutan-2-amine (9k)**

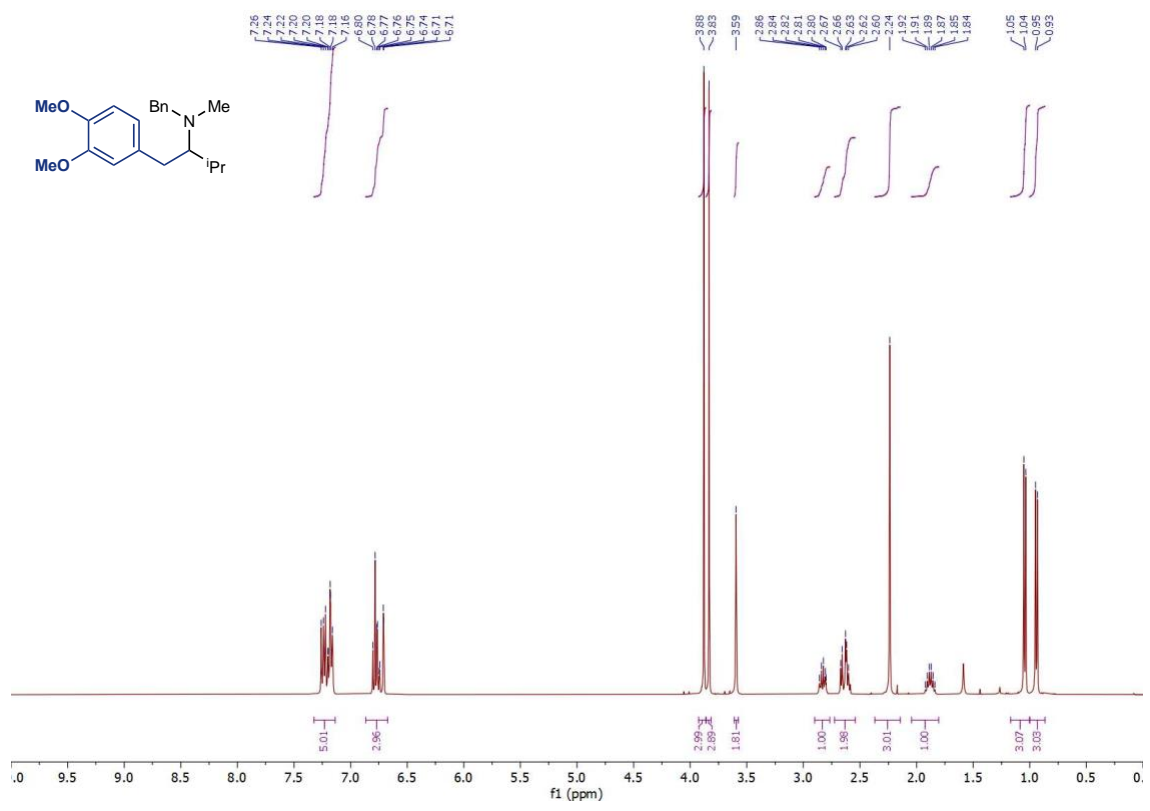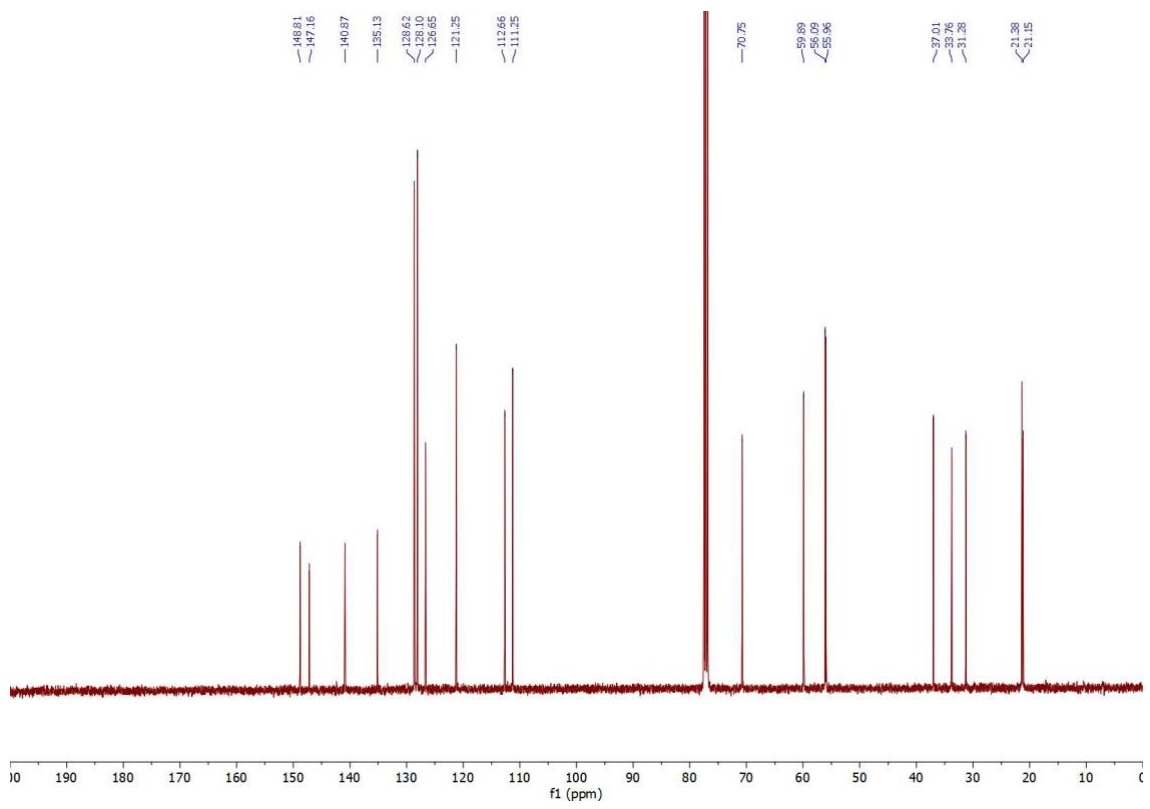



# N-Benzyl-N-methyl-1-phenylpropan-3-amine (9l)

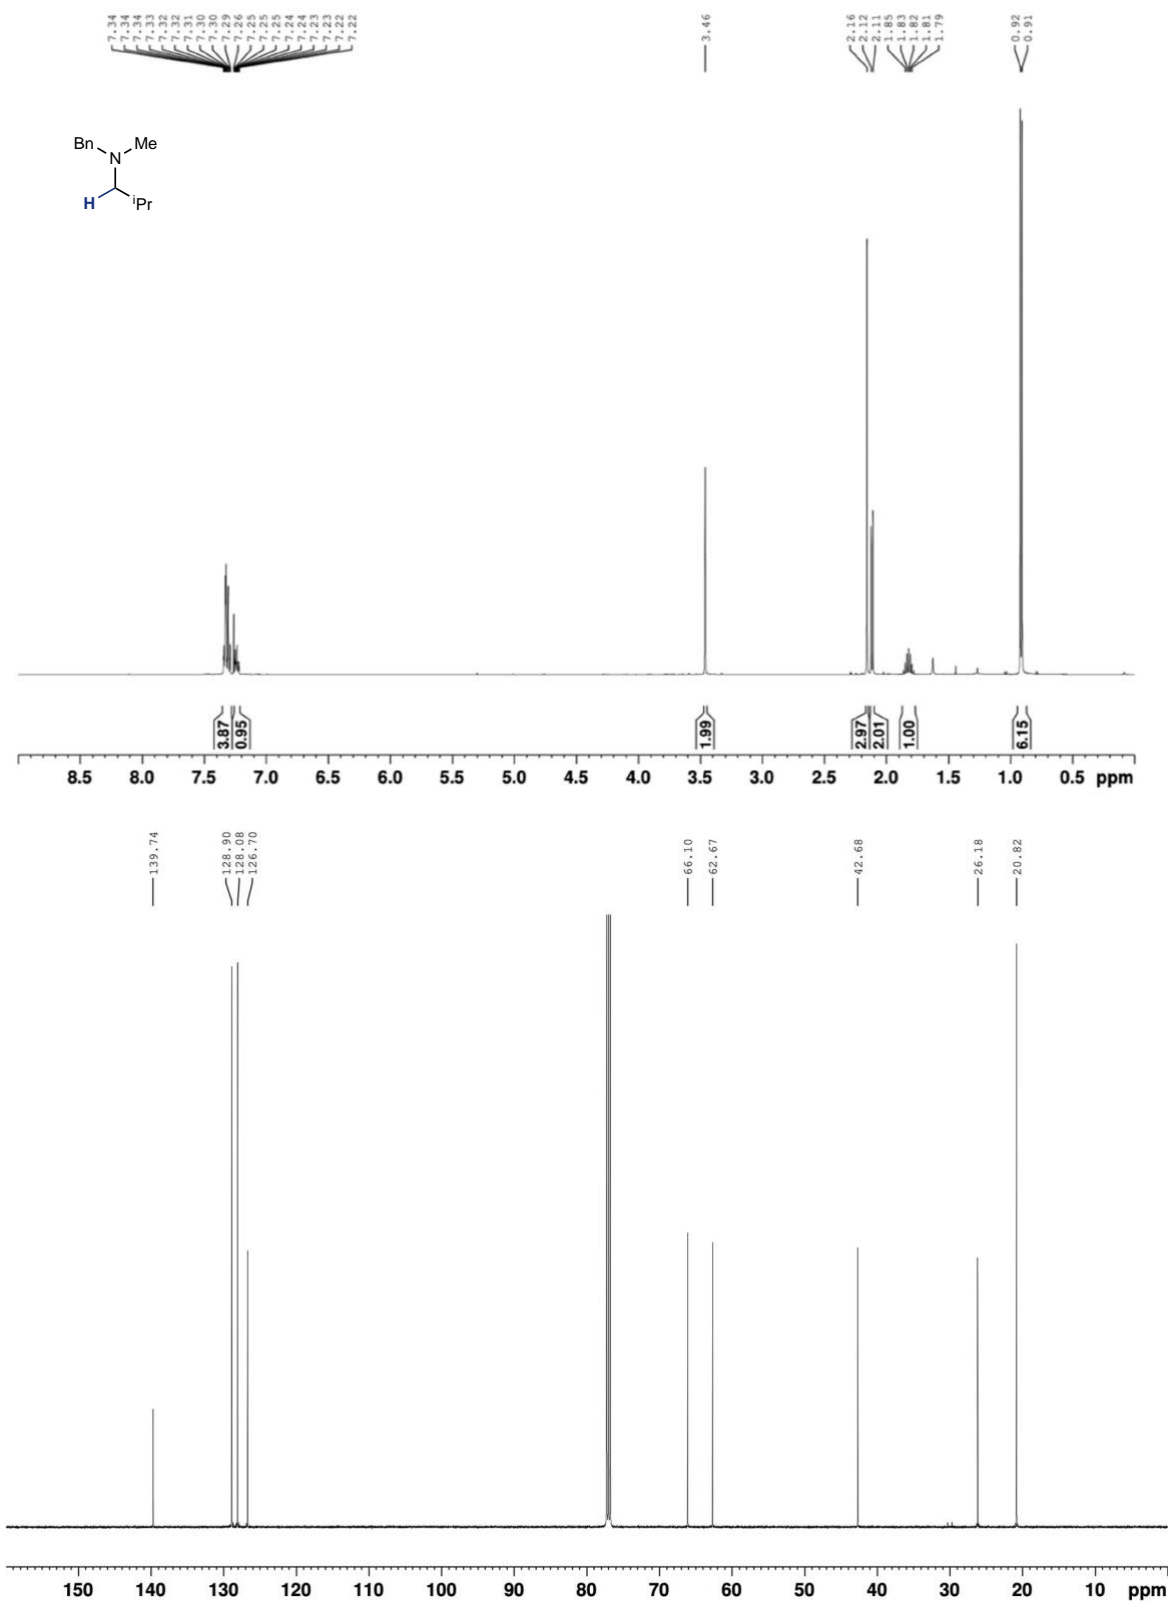

# N-benzyl-1-cyclohexyl-N-methyl-3-phenylpropan-1-amine (10a)

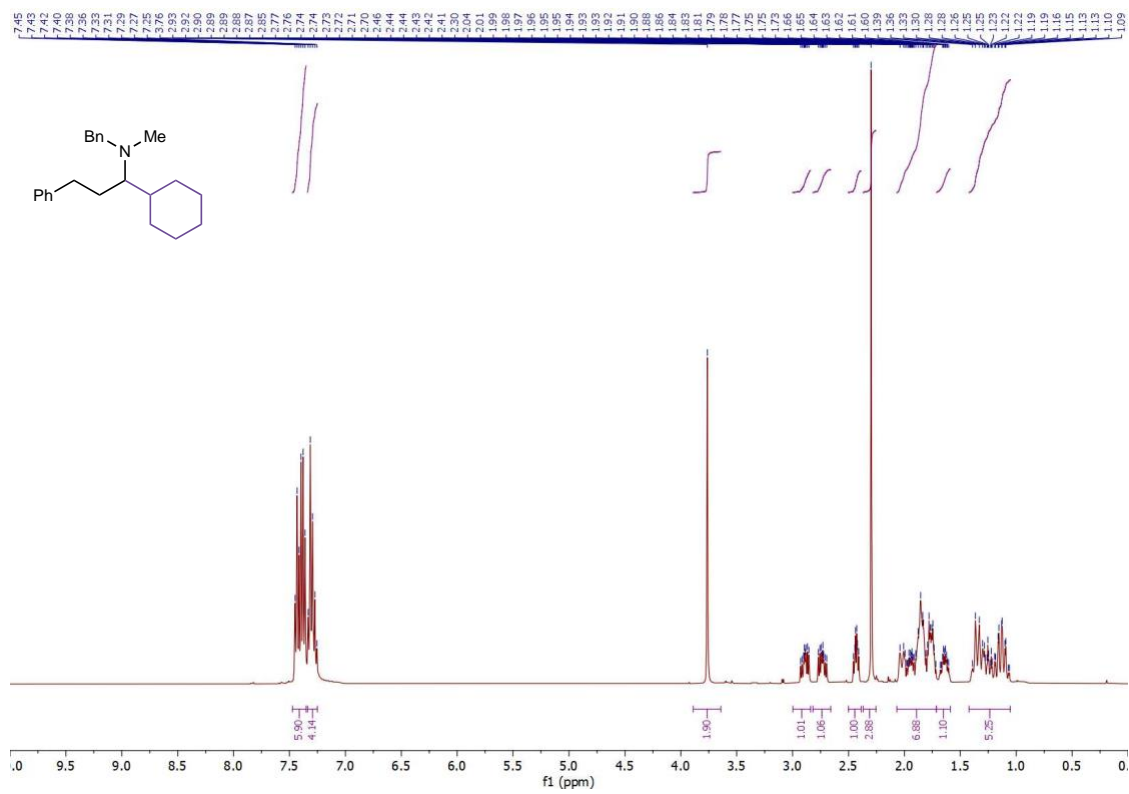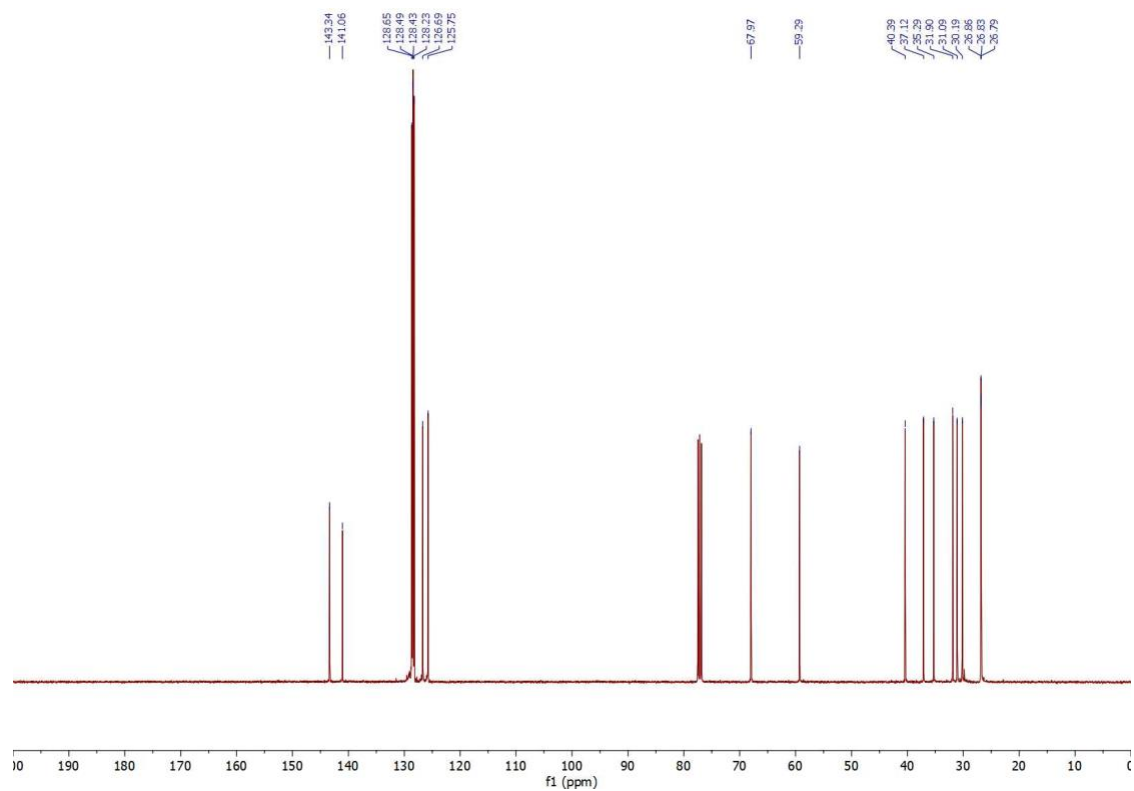

N-benzyl-N-methyl-3-phenyl-1-(tetrahydro-2H-pyran-4-yl)propan-1-amine (10b)

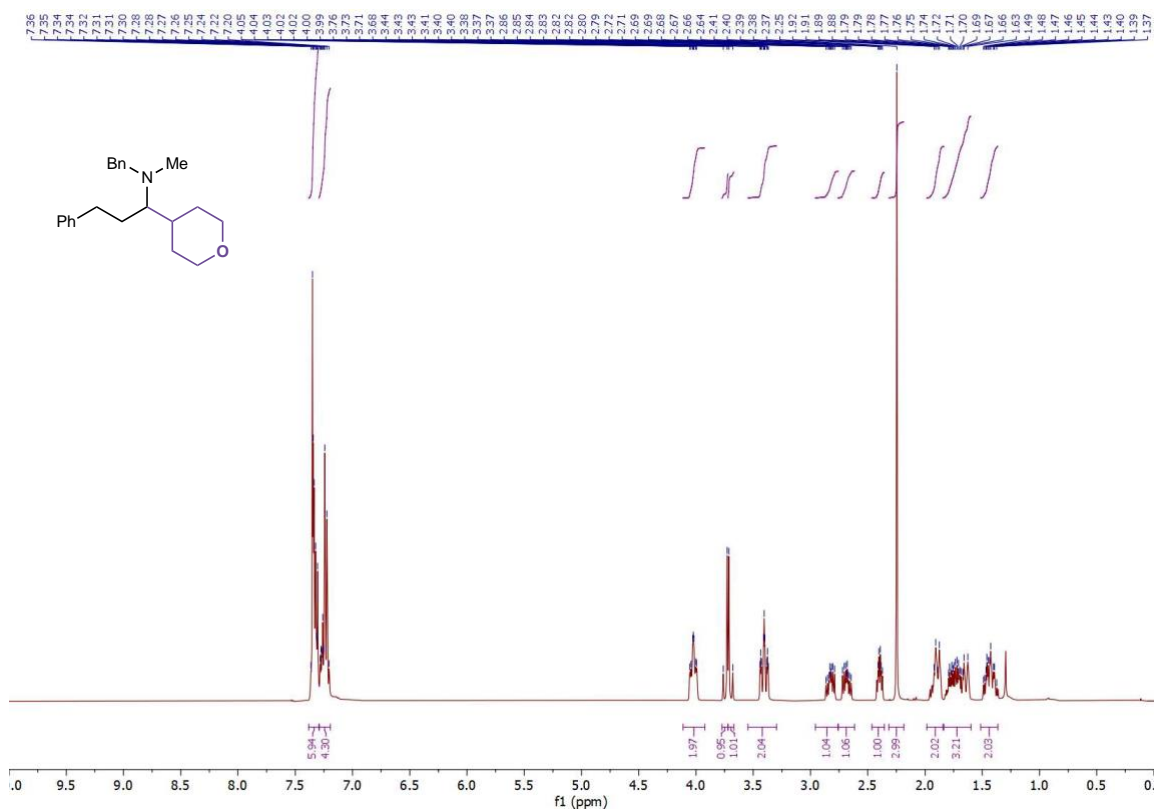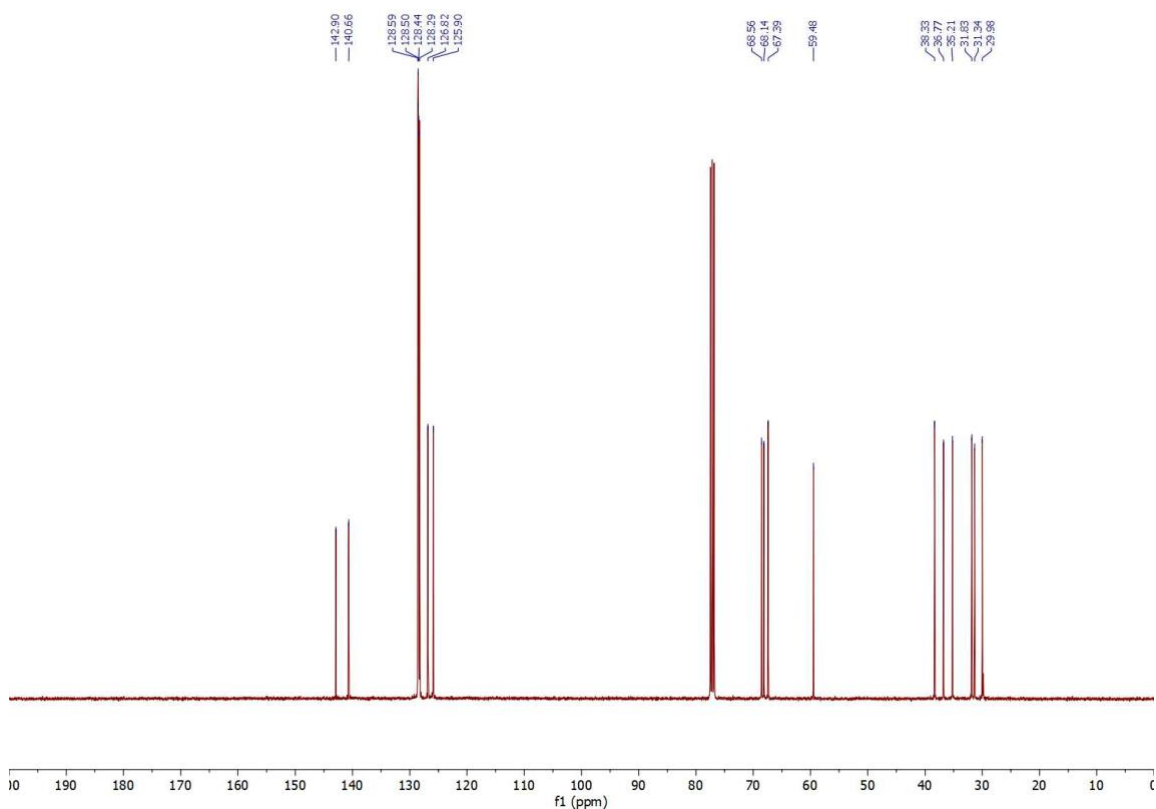

**N-benzyl-1-cyclopentyl-N-methyl-3-phenylpropan-1-amine (10d)**

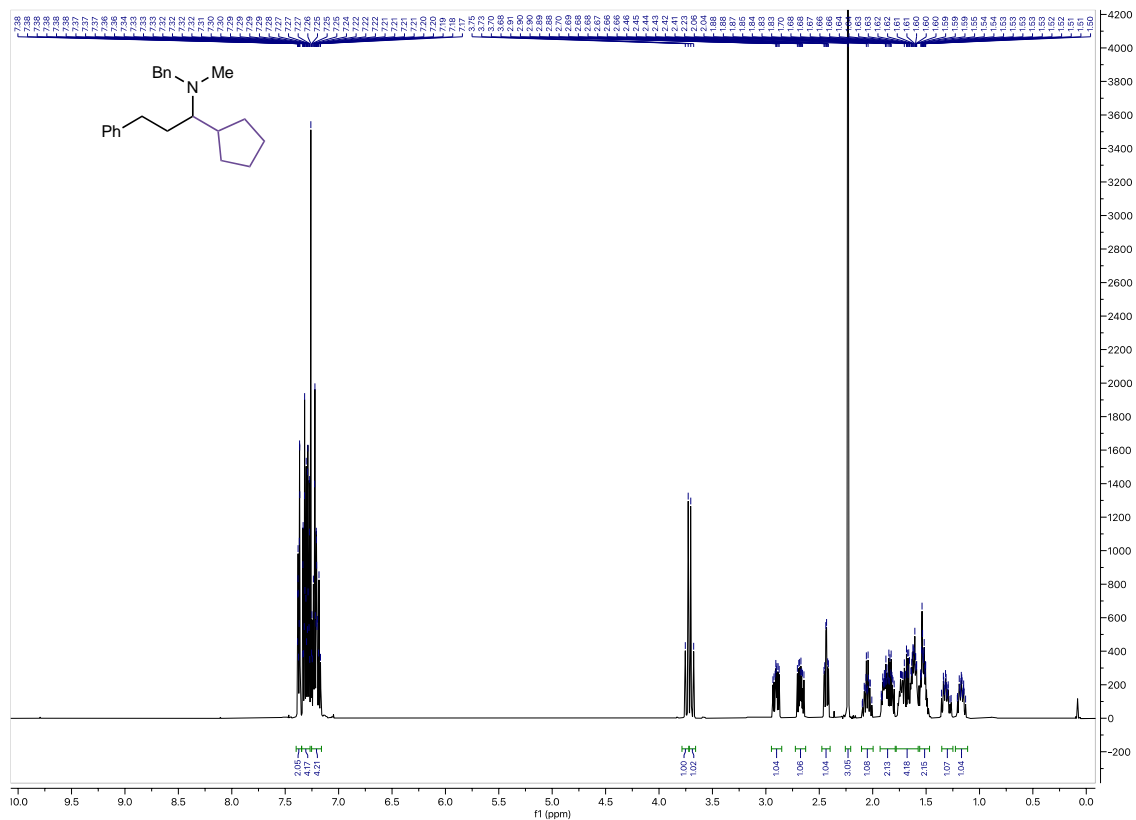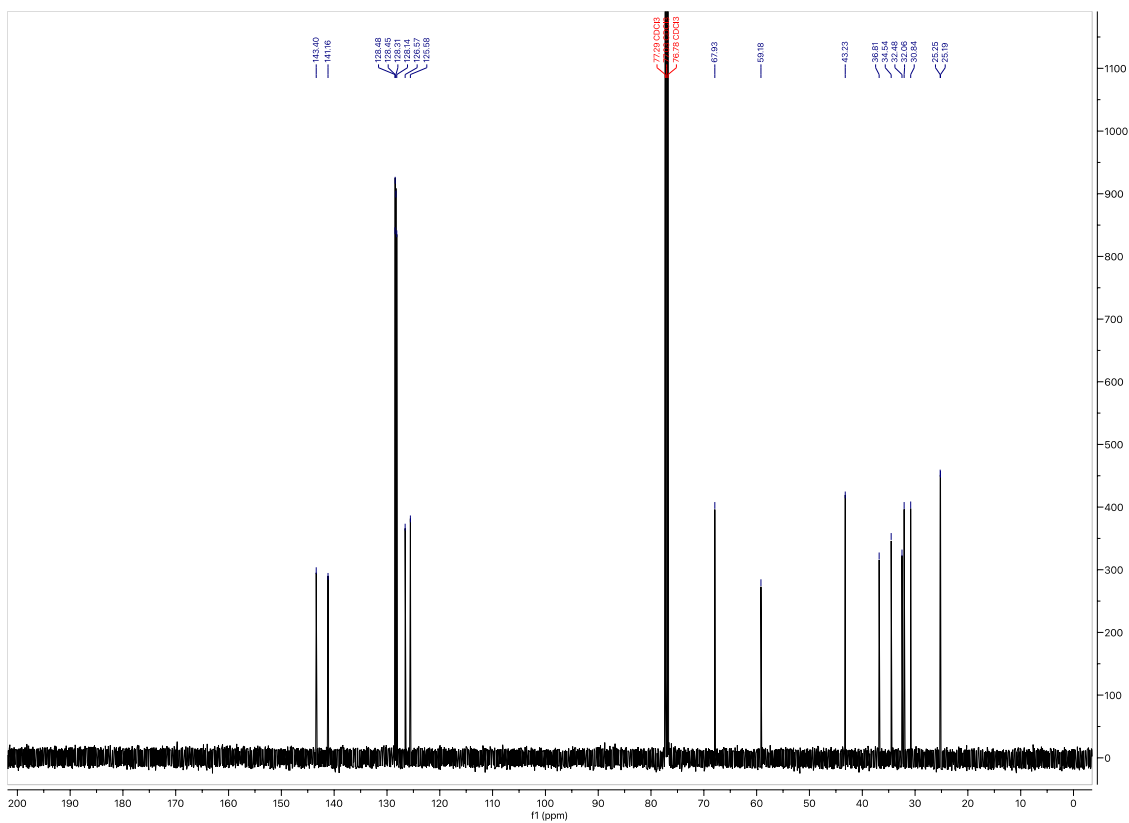

N-benzyl-N-methyl-4-methyl-1-phenylhexan-3-amine (10e)

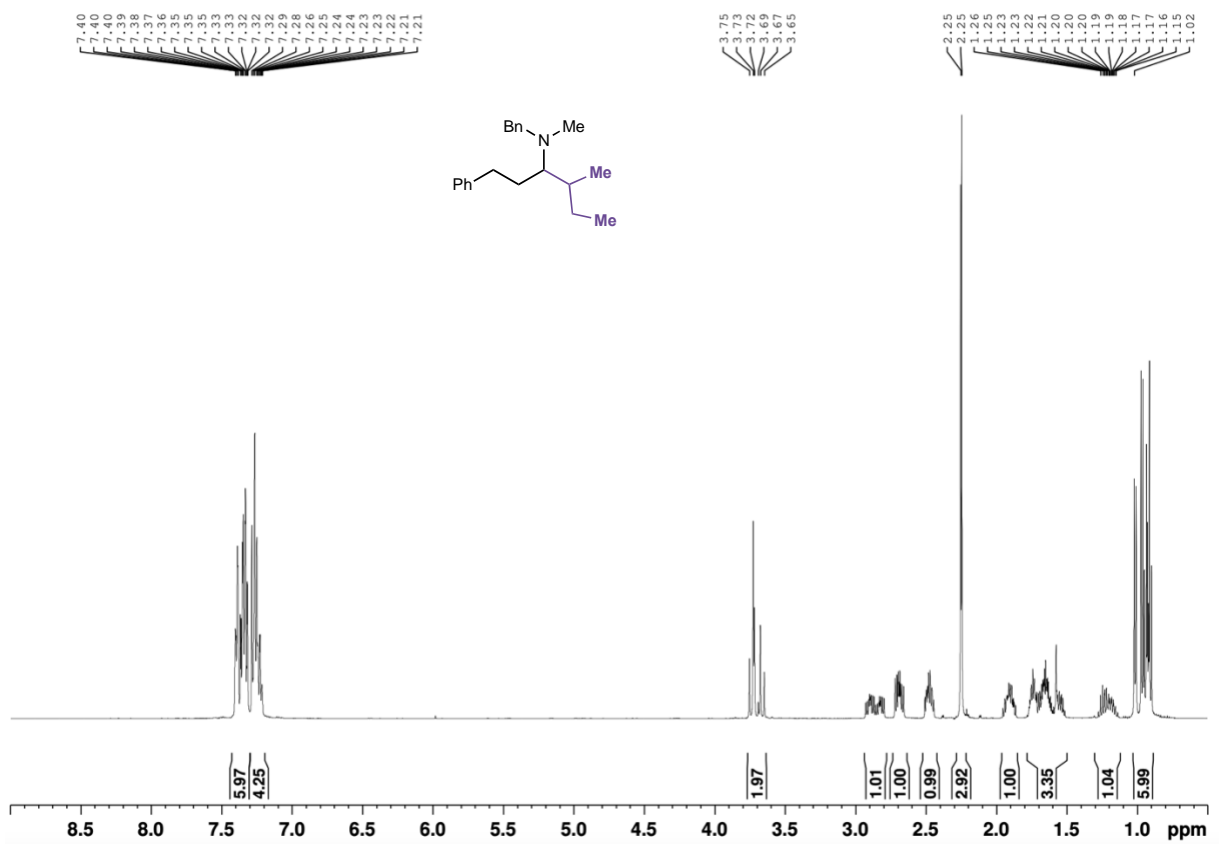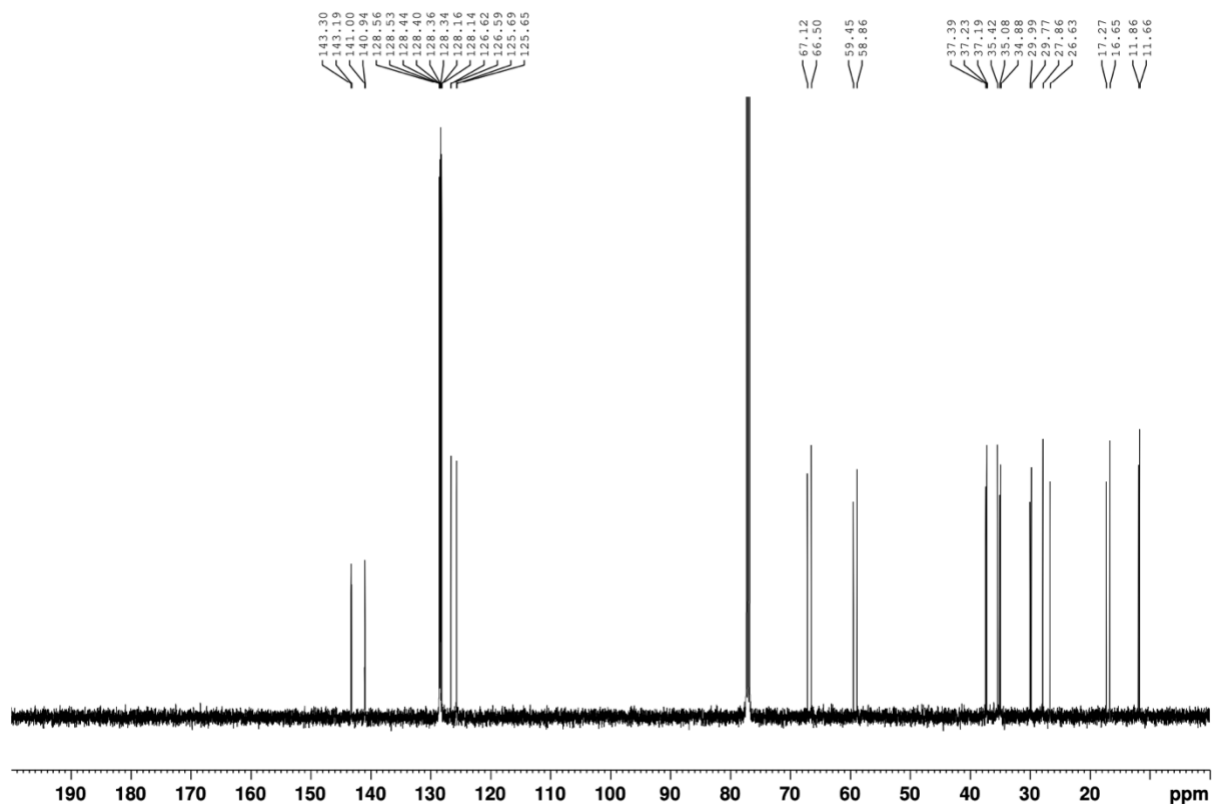

**N-Benzyl-1-(4-iodophenyl)-N-methyl-4-phenylbutan-2-amine (10f)**

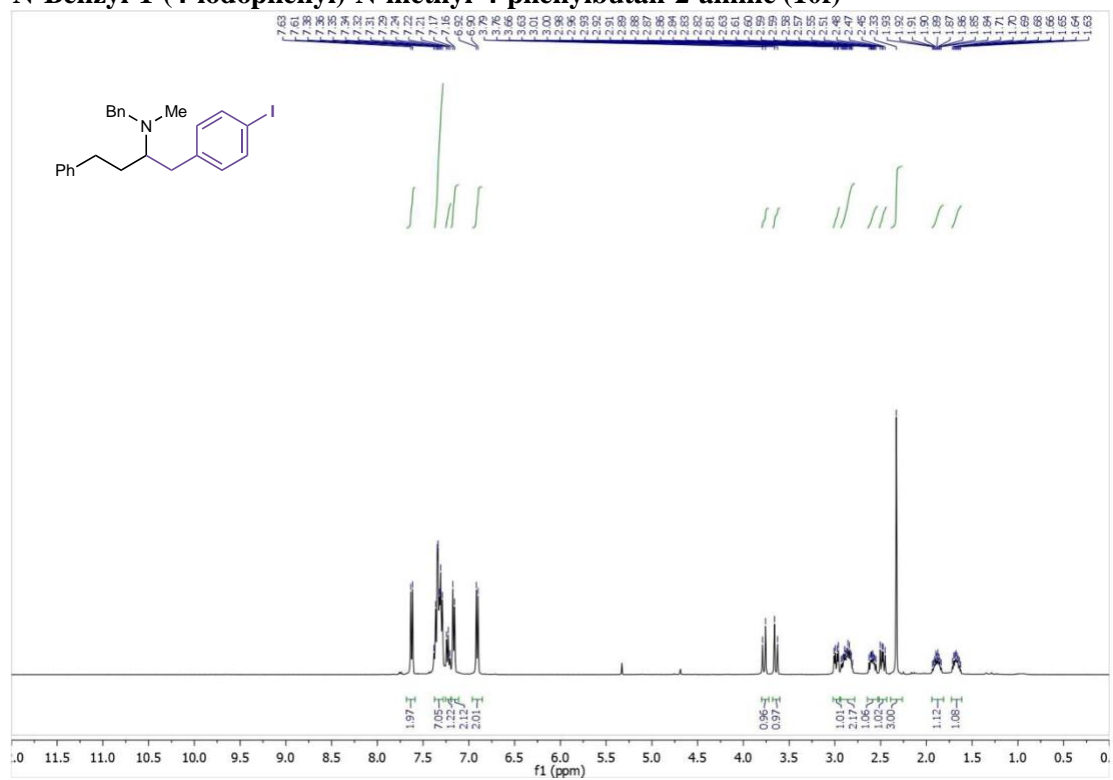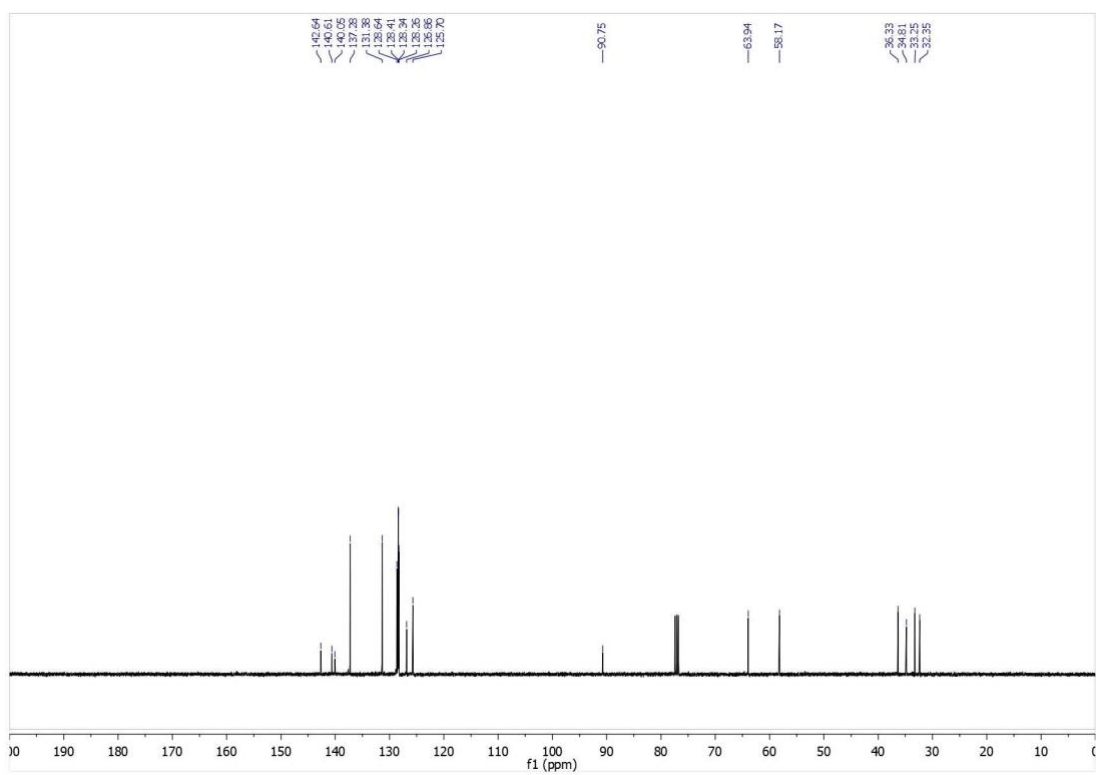

### Methyl 3-(2-(benzyl(methyl)amino)-4-phenylbutyl)benzoate (10g)

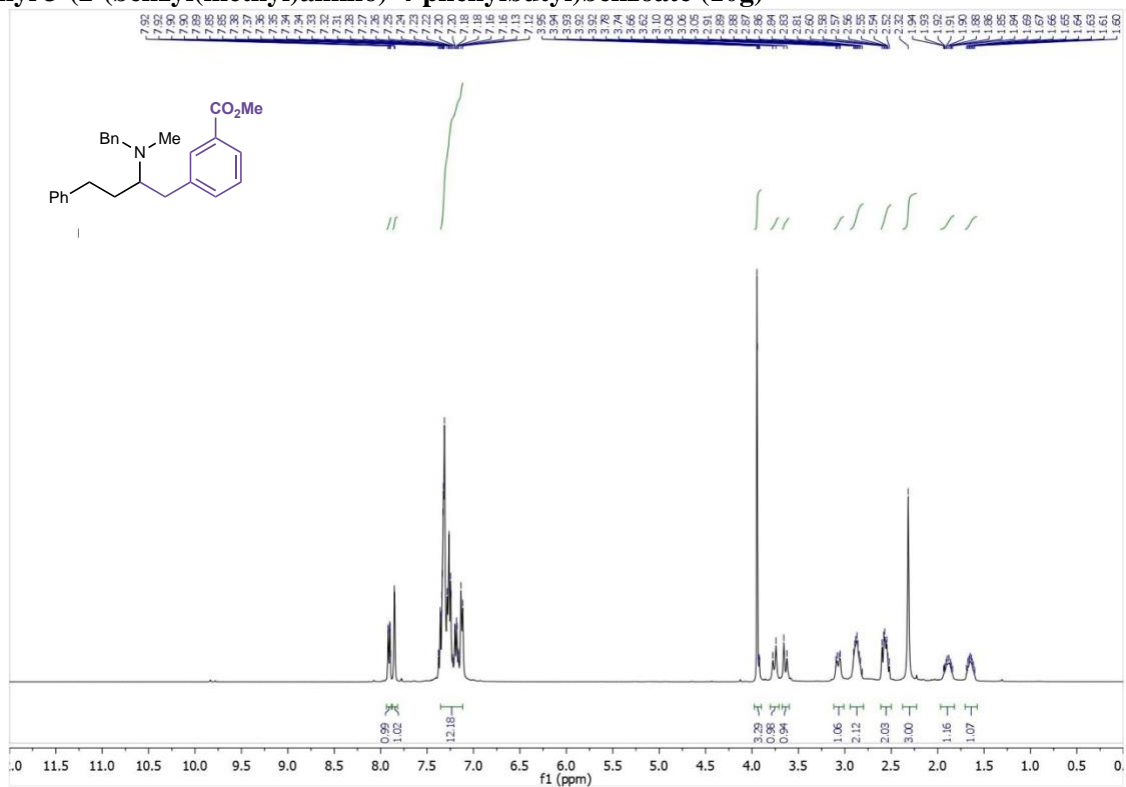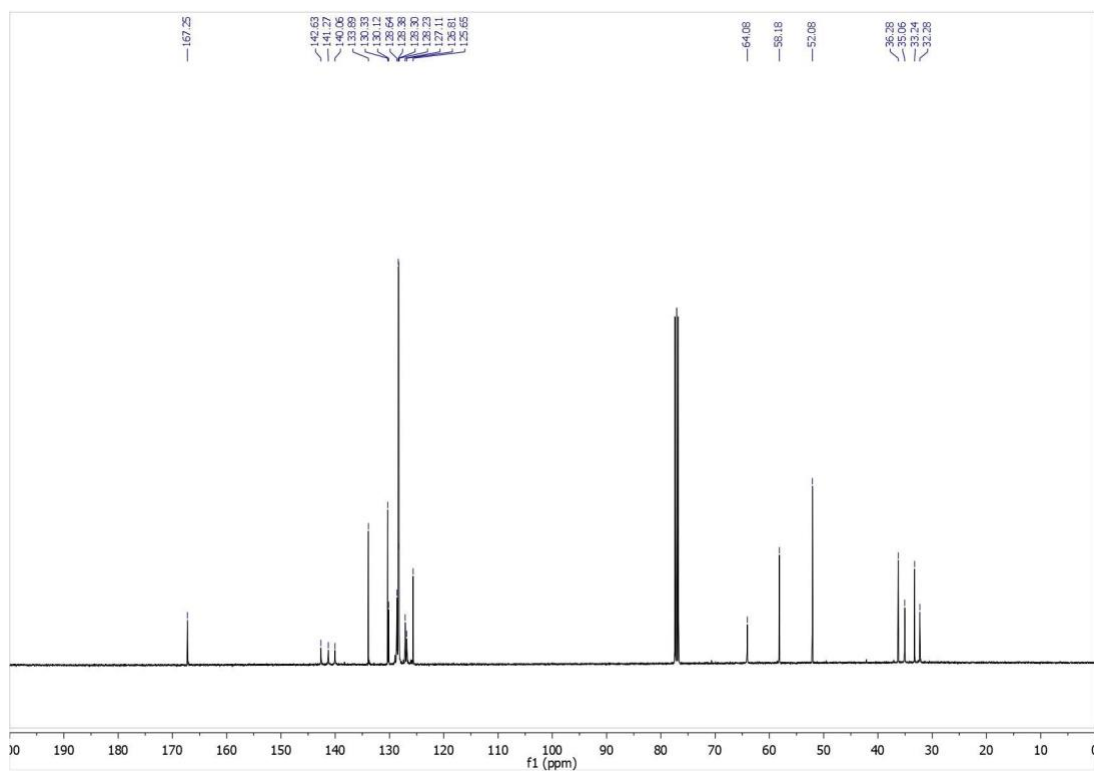

**N-benzyl-N-methyl-1,4-diphenylbutan-2-amine (10h)**

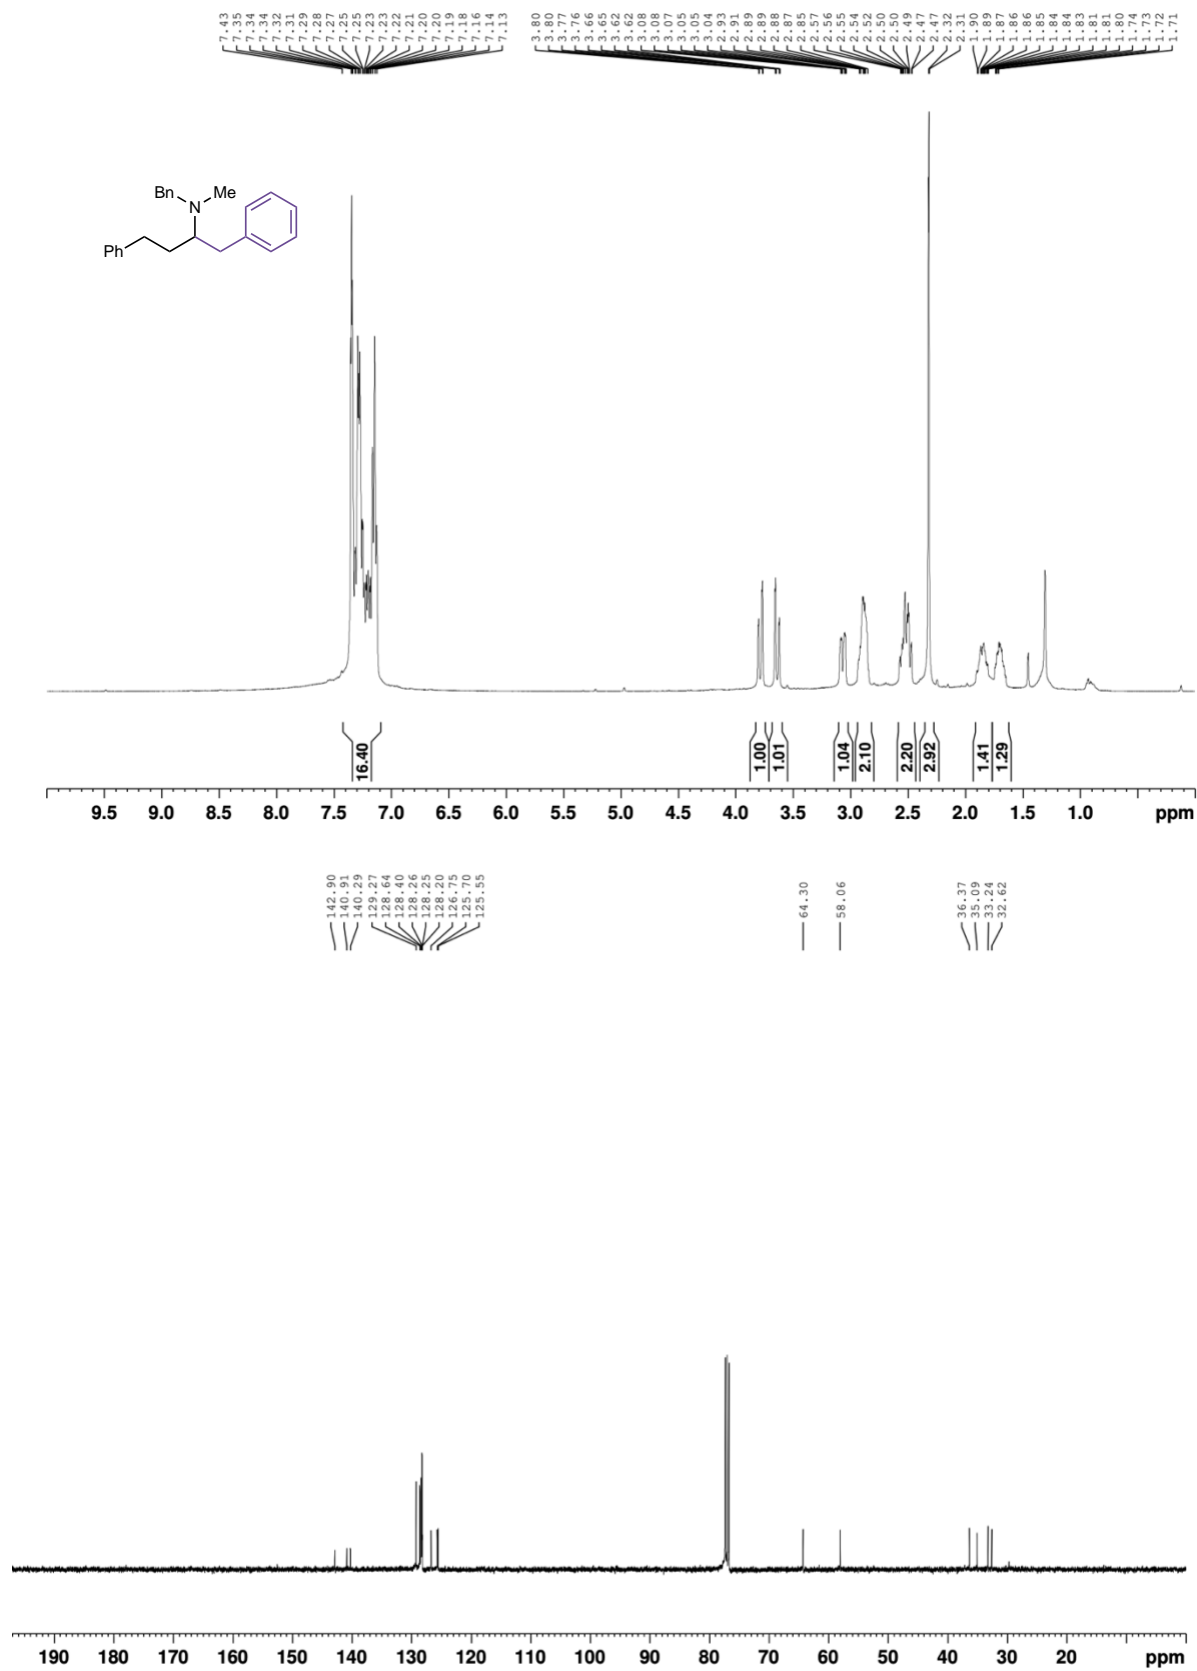



**N-benzyl-1-(4-chlorophenyl)-N-methyl-4-phenylbutan-2-amine (10i)**

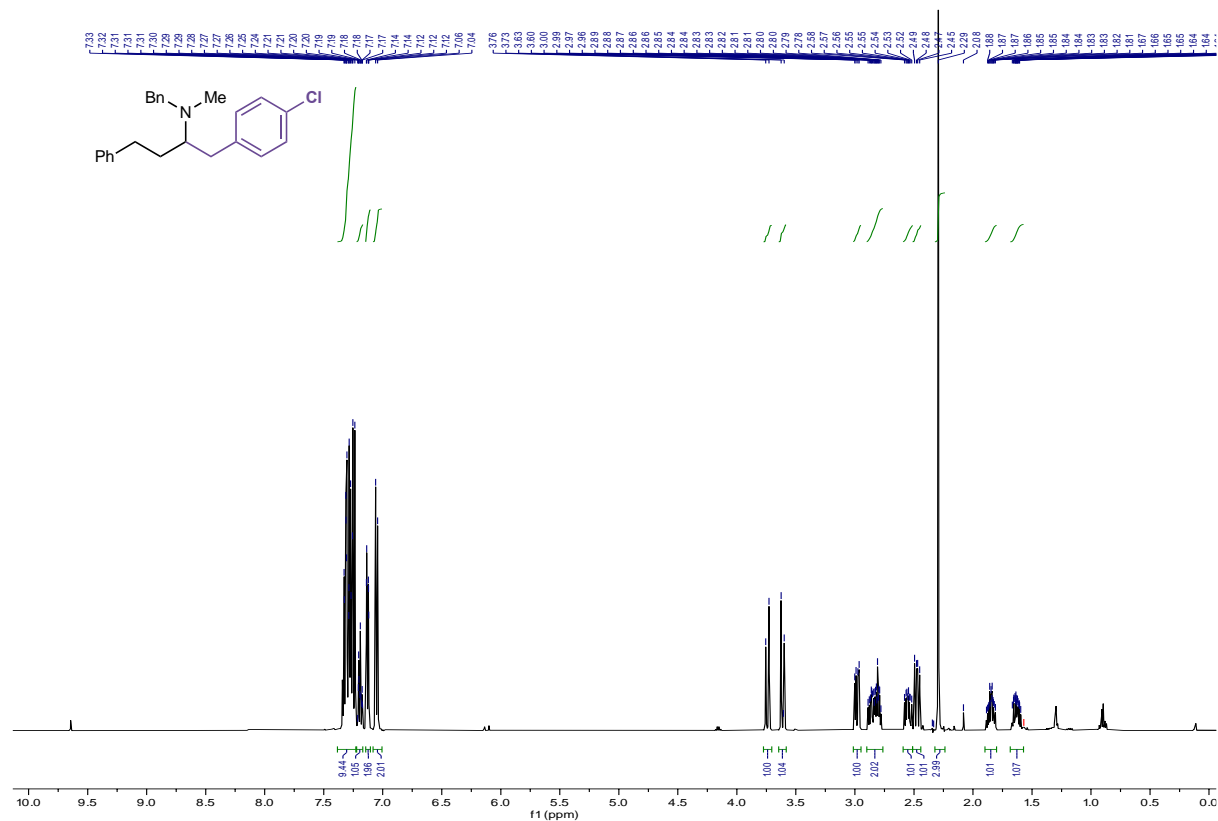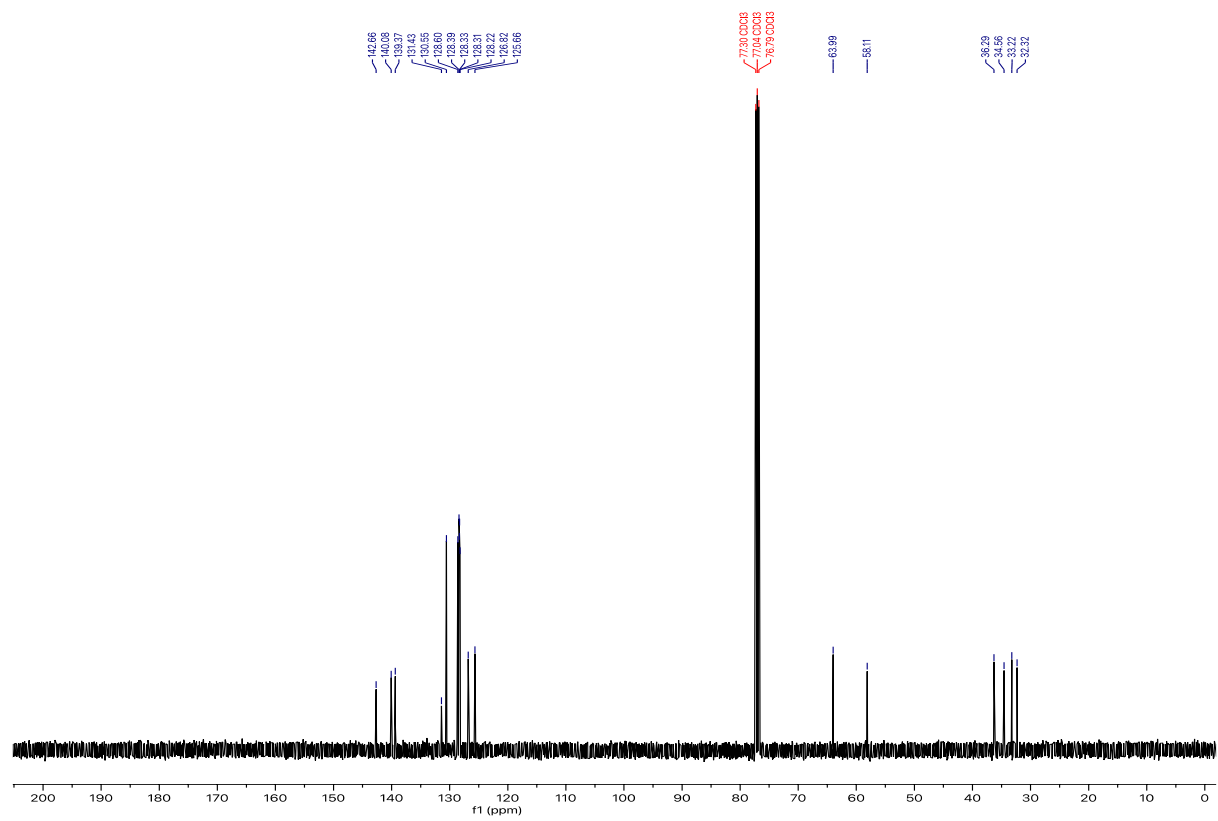

# N-benzyl-N-methyl-1,1,4-triphenylbutan-2-amine (10j)

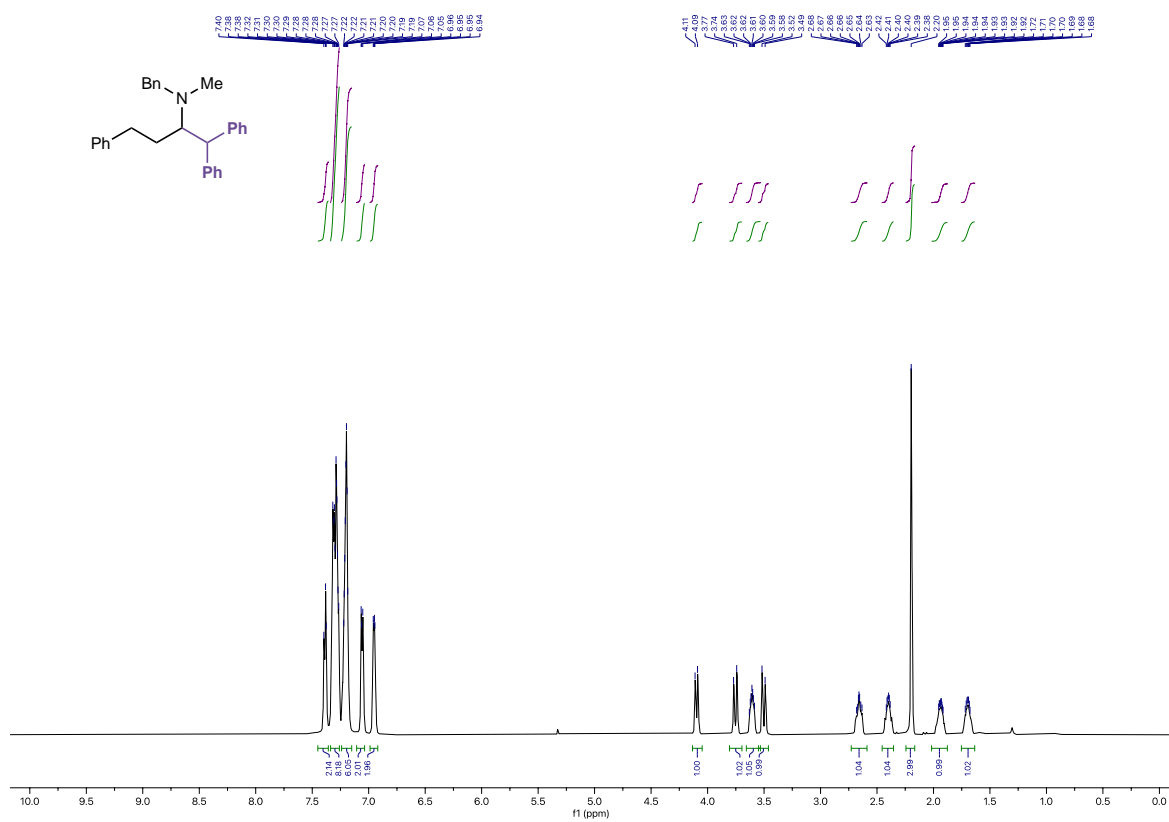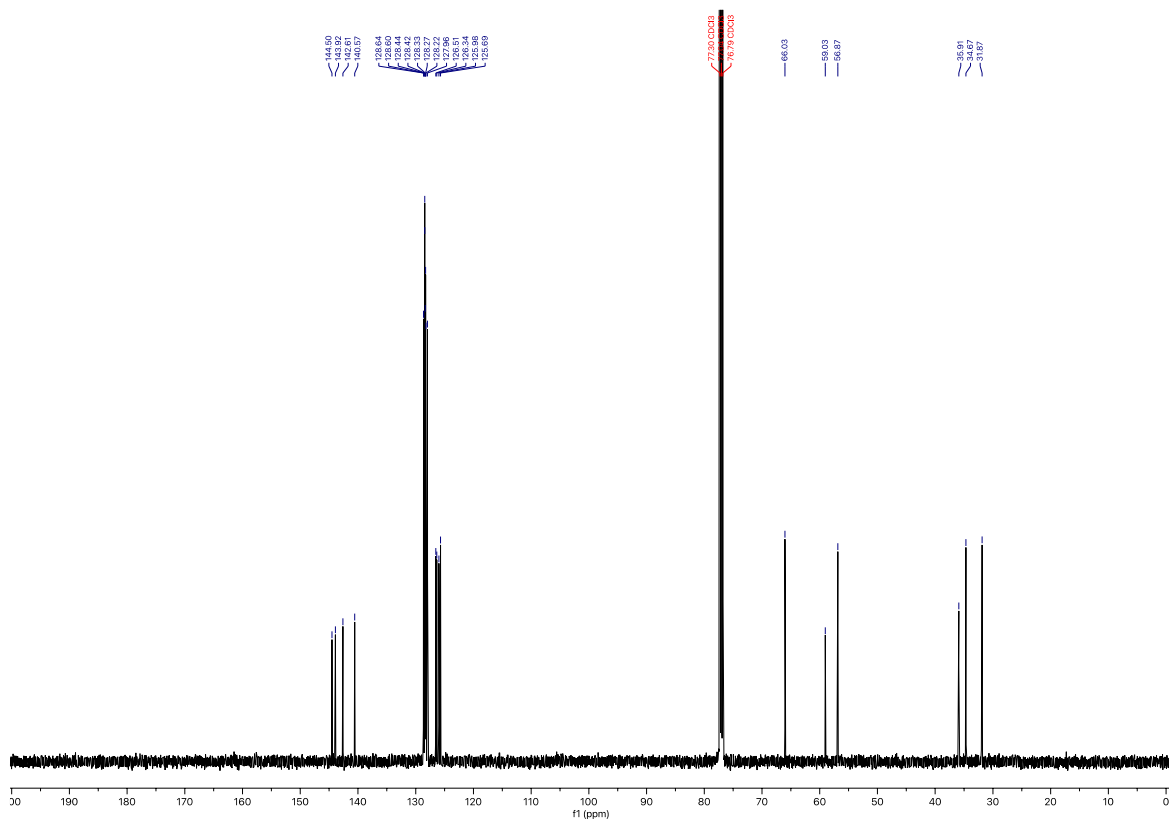



**Ethyl 3-(benzyl(methyl)amino)-2,2-difluoro-5-phenylpentanoate (10l)**

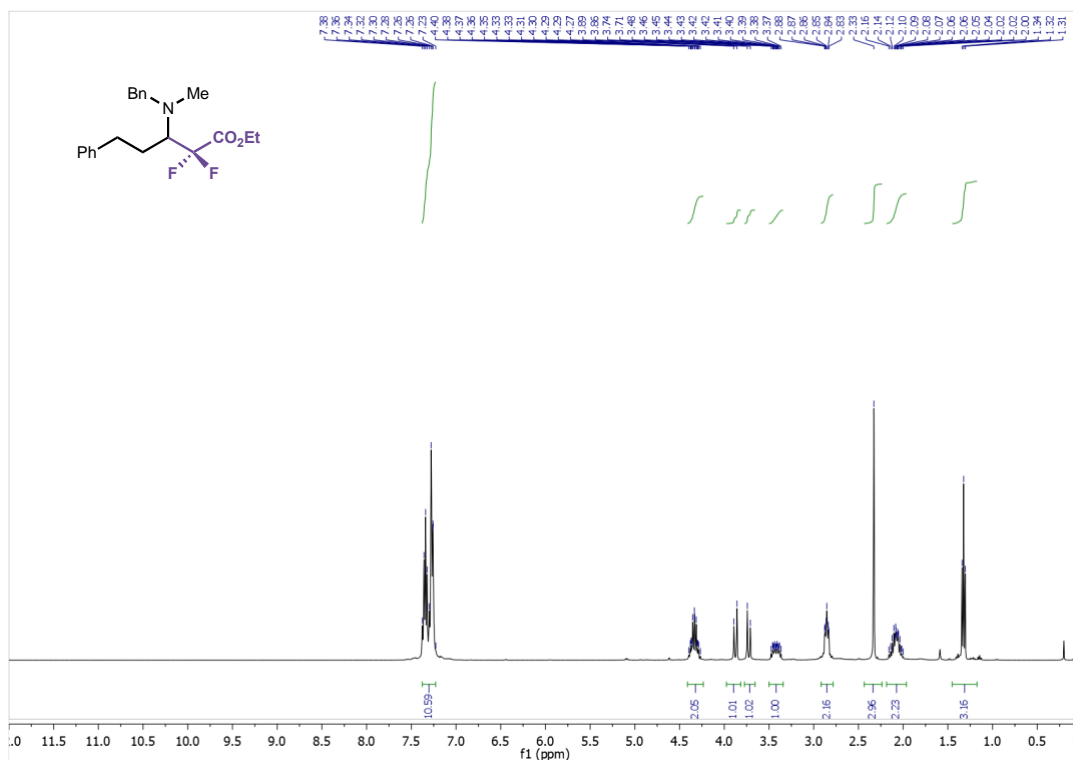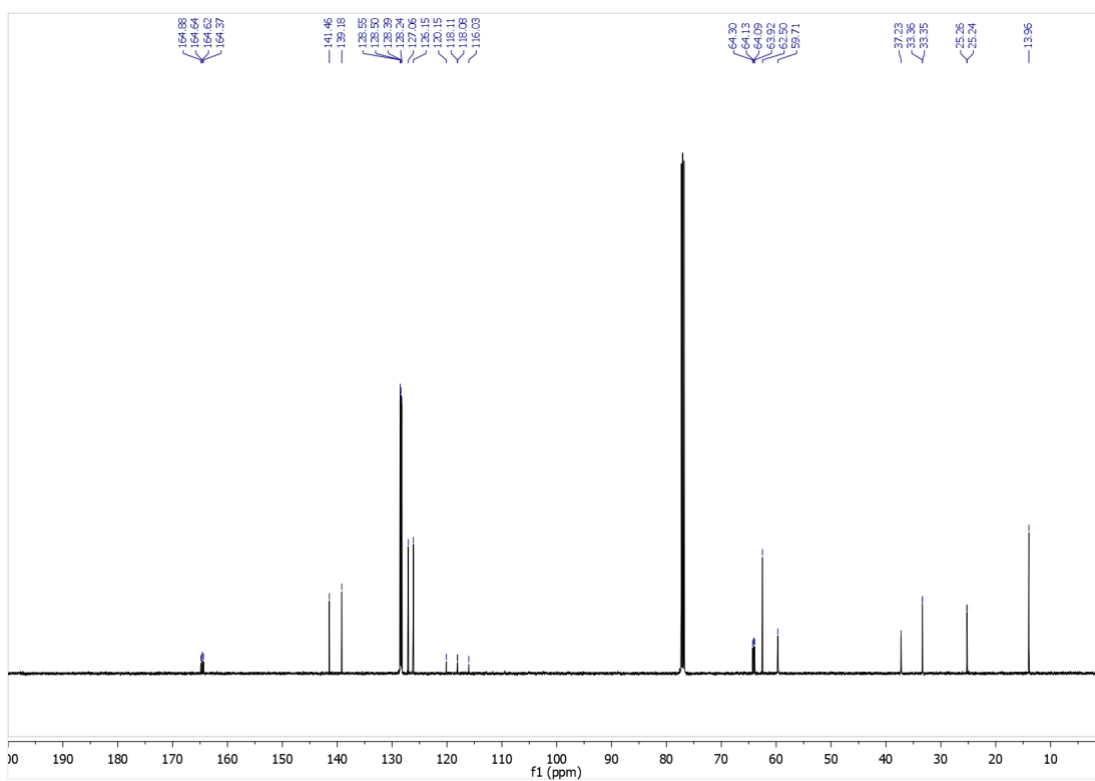

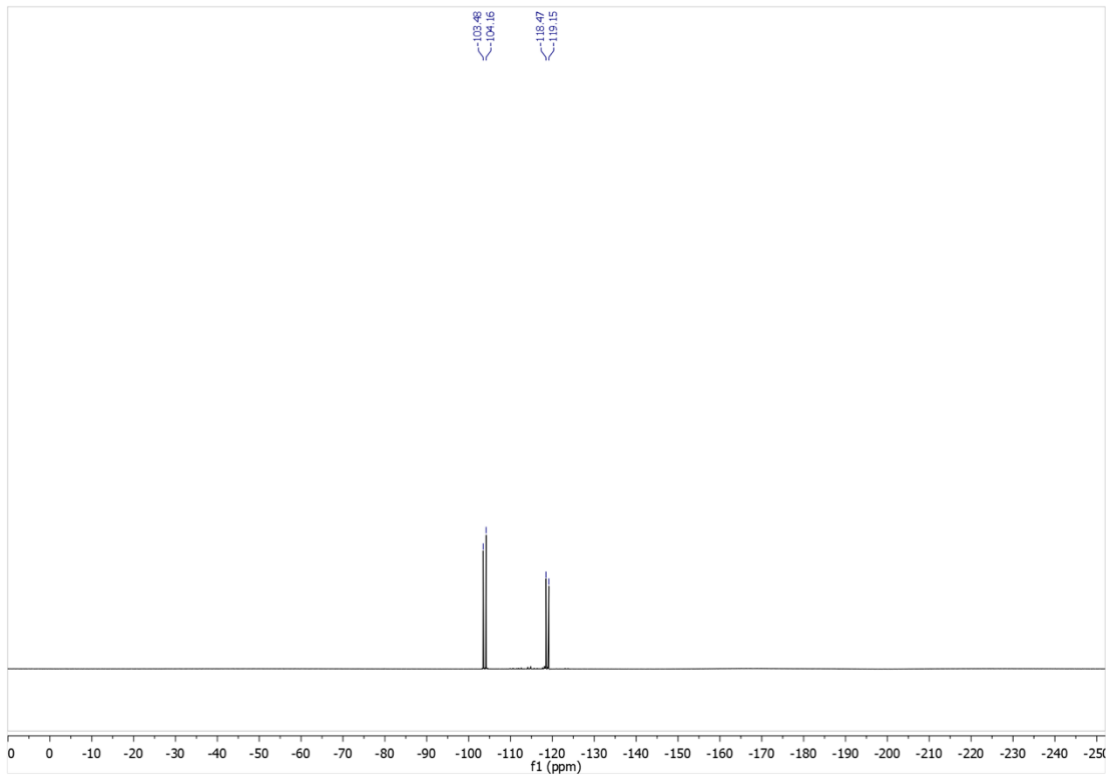

**N,N-Dibenzyl-1-phenylbutan-3-amine (11a)**

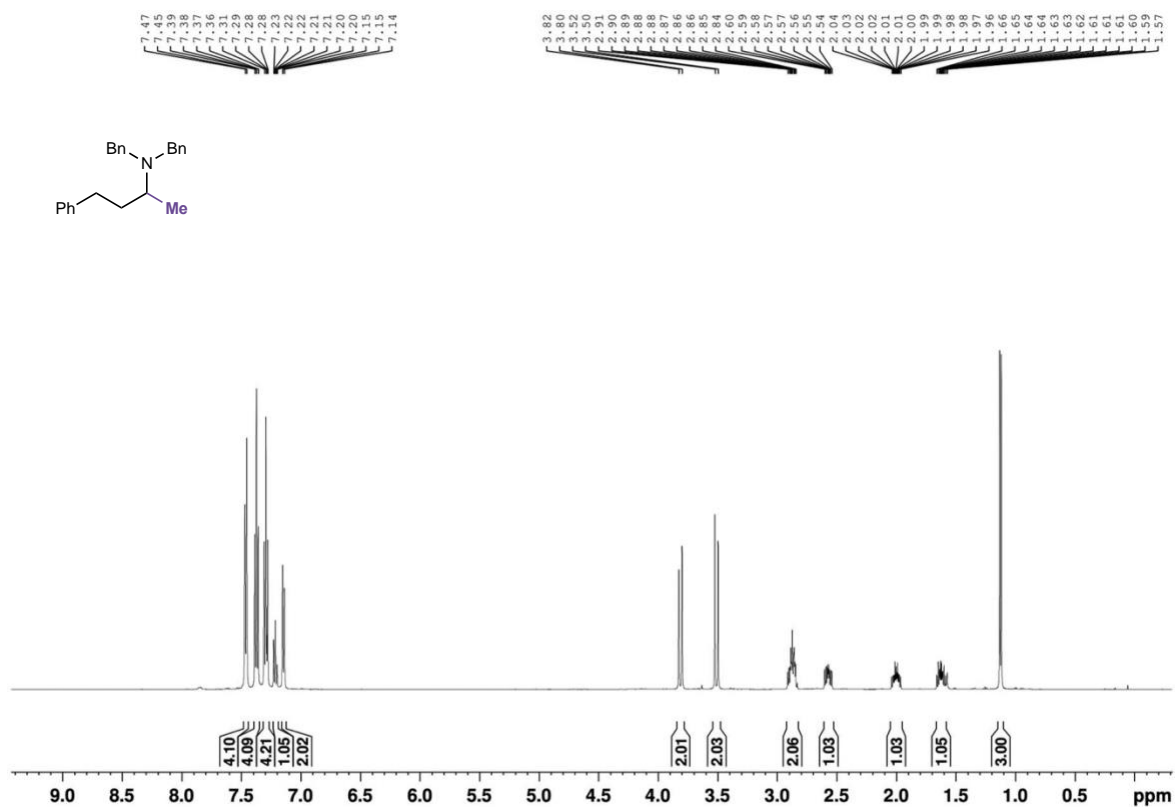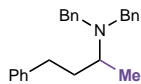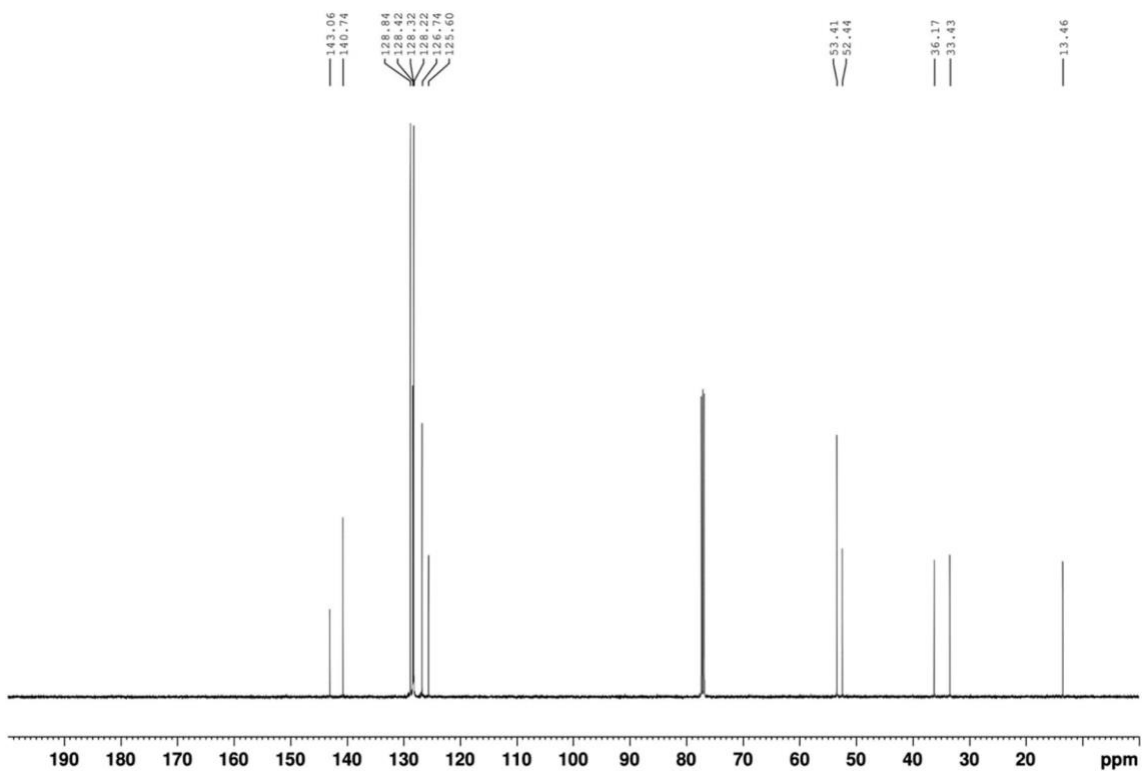

# 1-N-Cbz-4-(4-phenylbutan-2-yl)piperazine (11b)

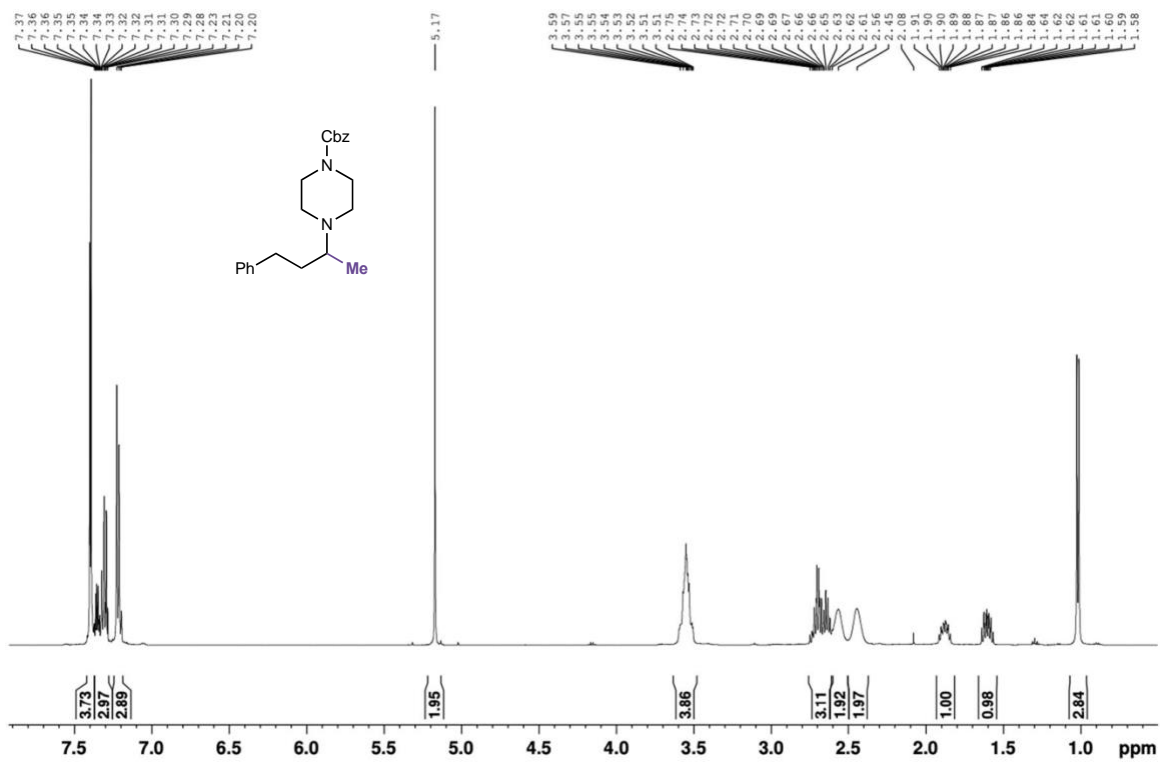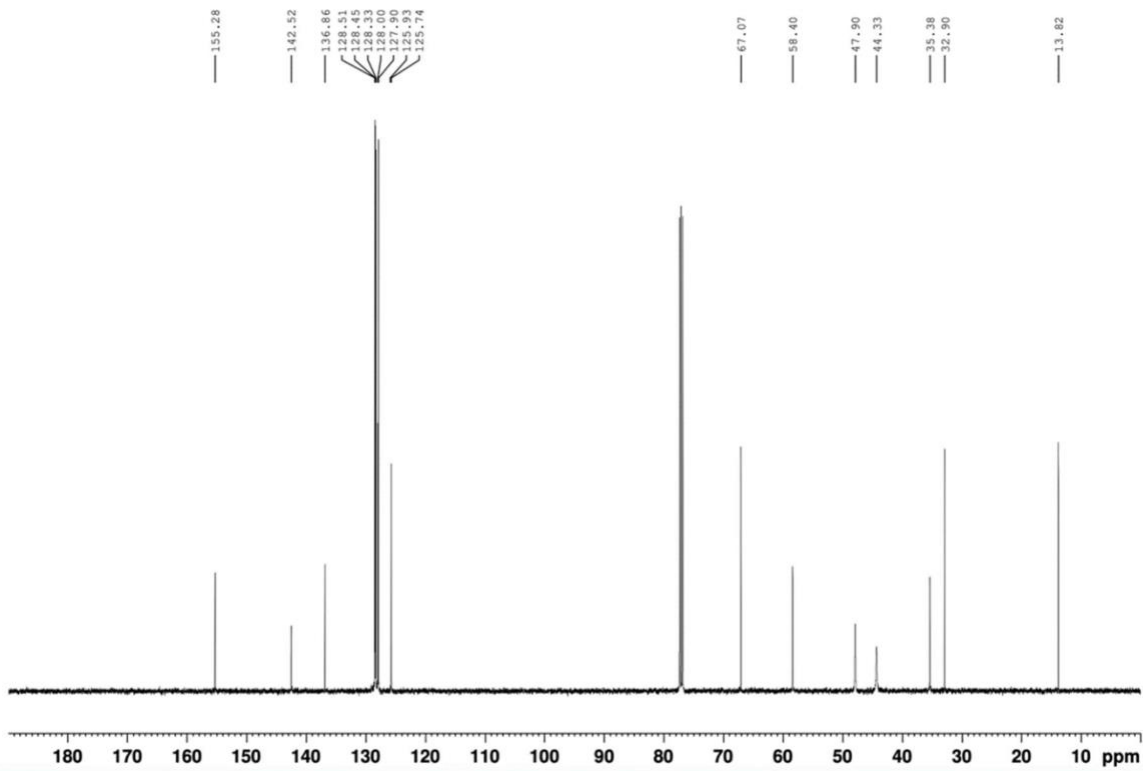

# N-benzyl-1-fluoro-N-methyl-5-phenylpentan-3-amine (11d)

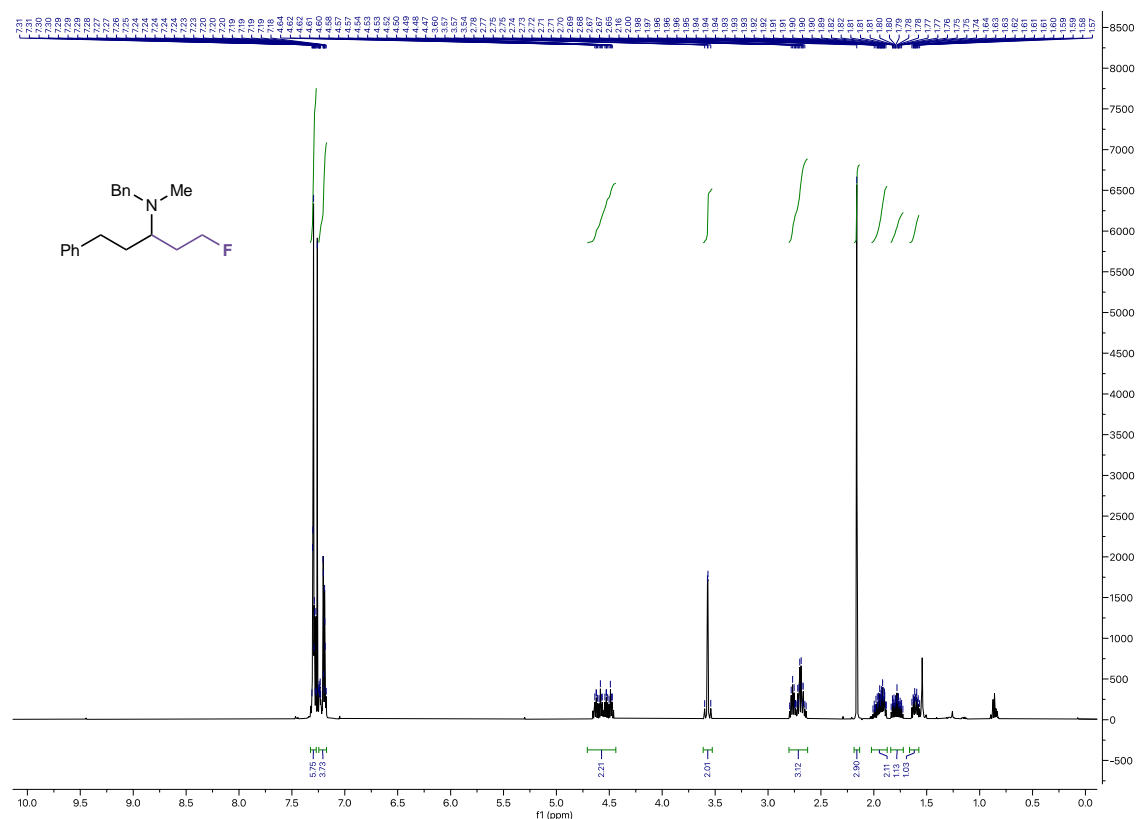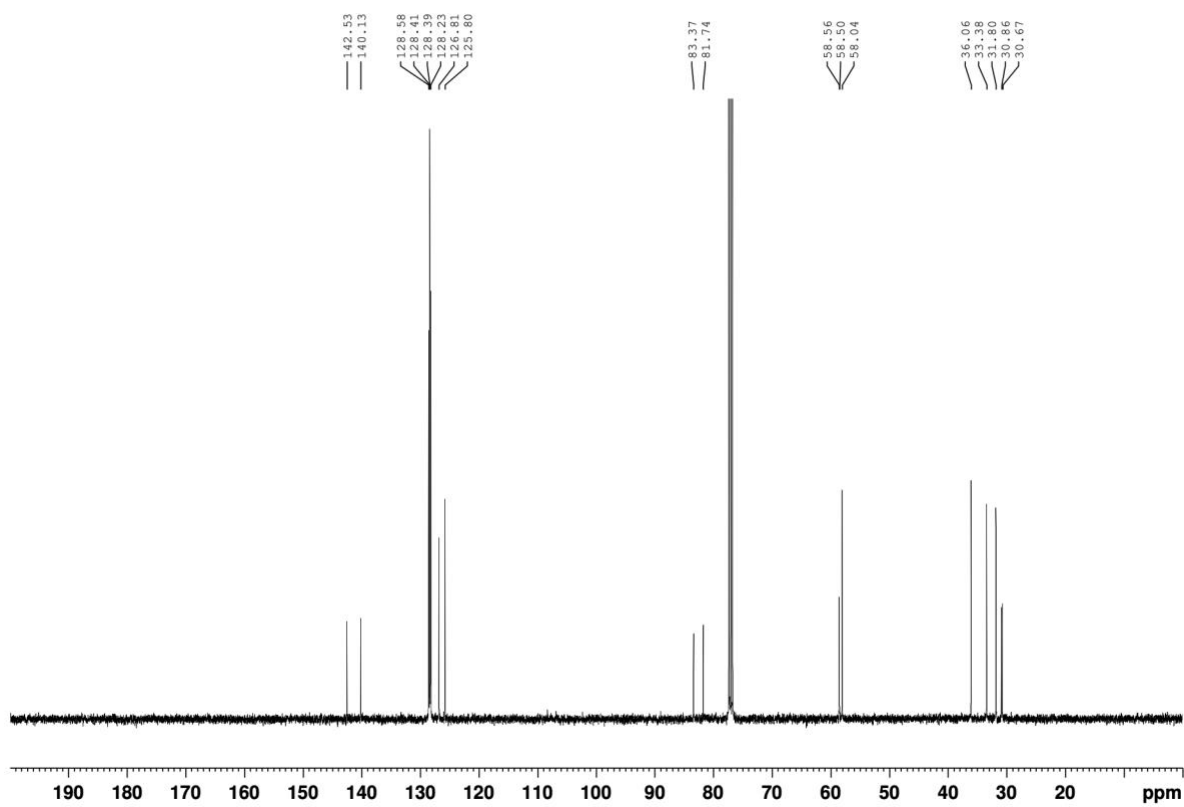



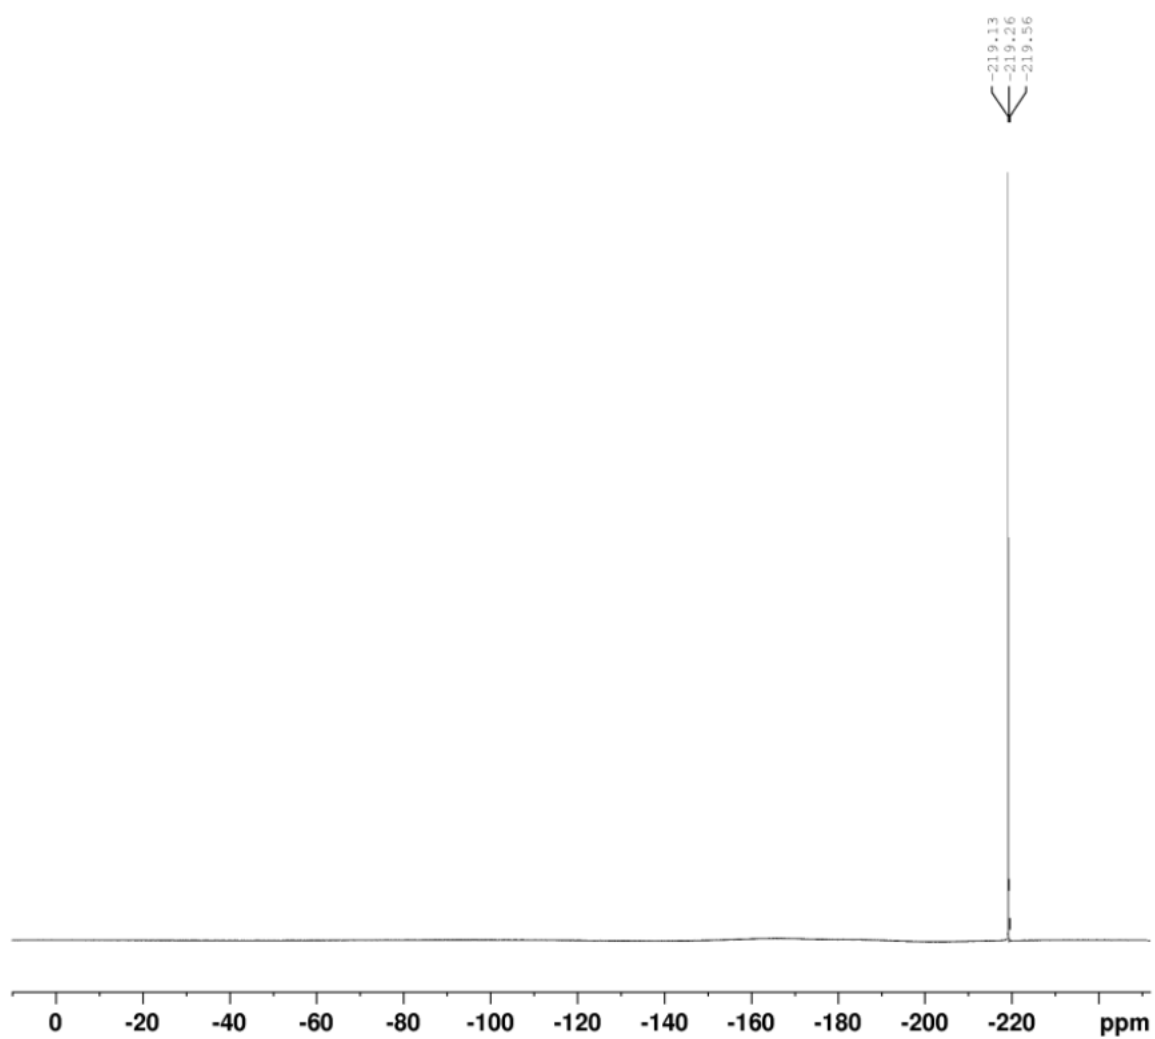

**N-Benzyl-N-methyl-1-phenylhexan-3-amine (11e)**

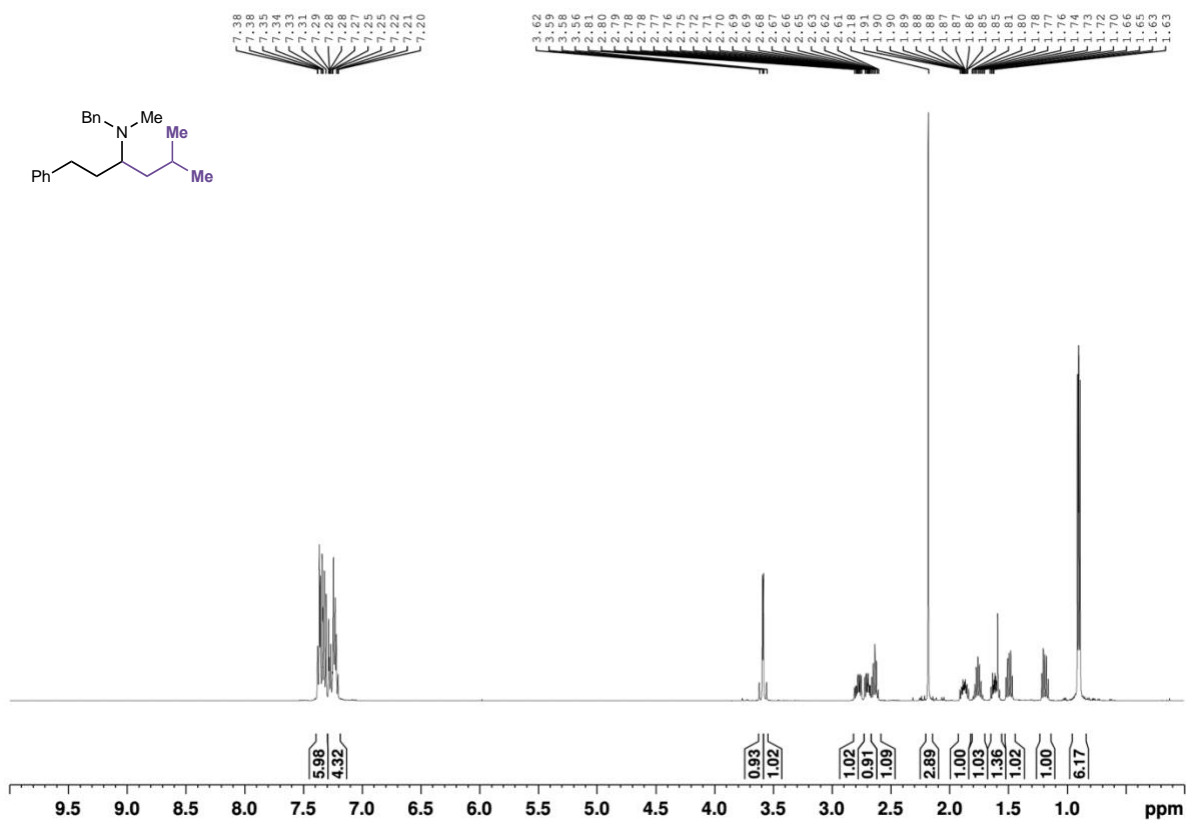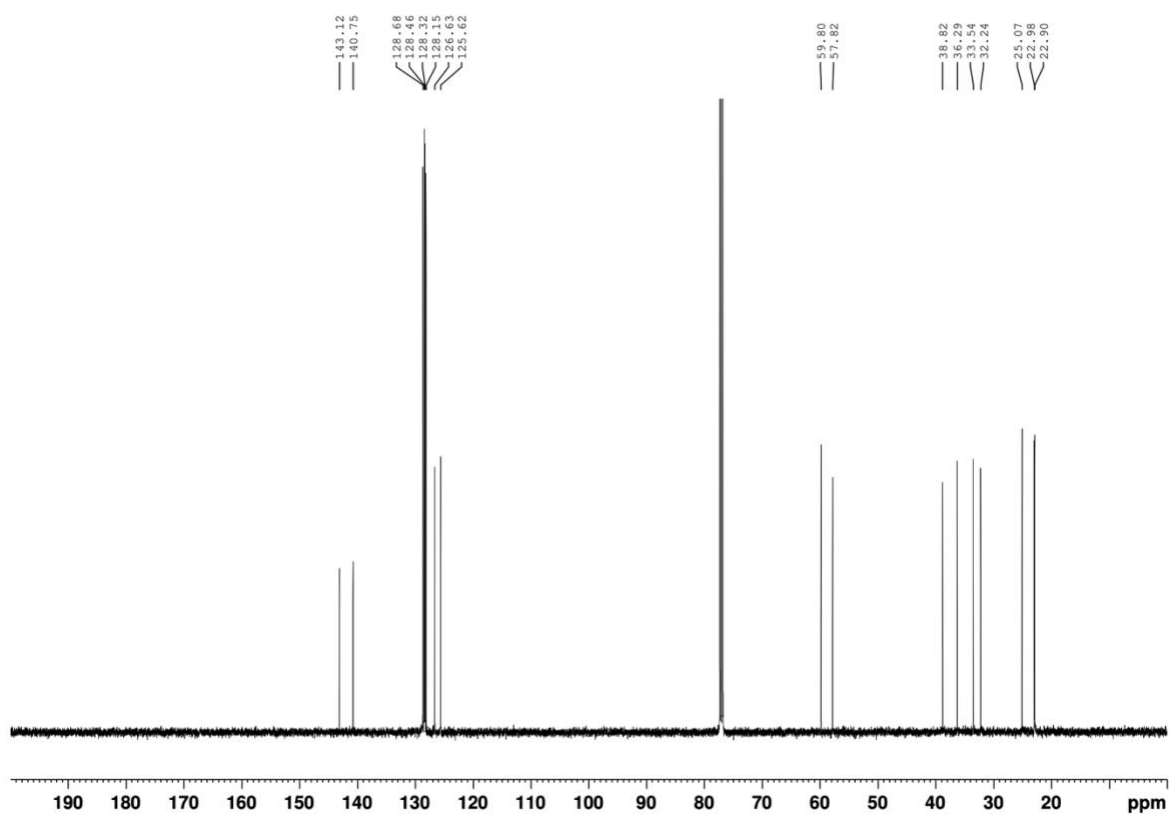

# N-benzyl-N-methyl-1-phenylpentan-3-amine-4,4,5,5,5-d<sub>5</sub> (11f)

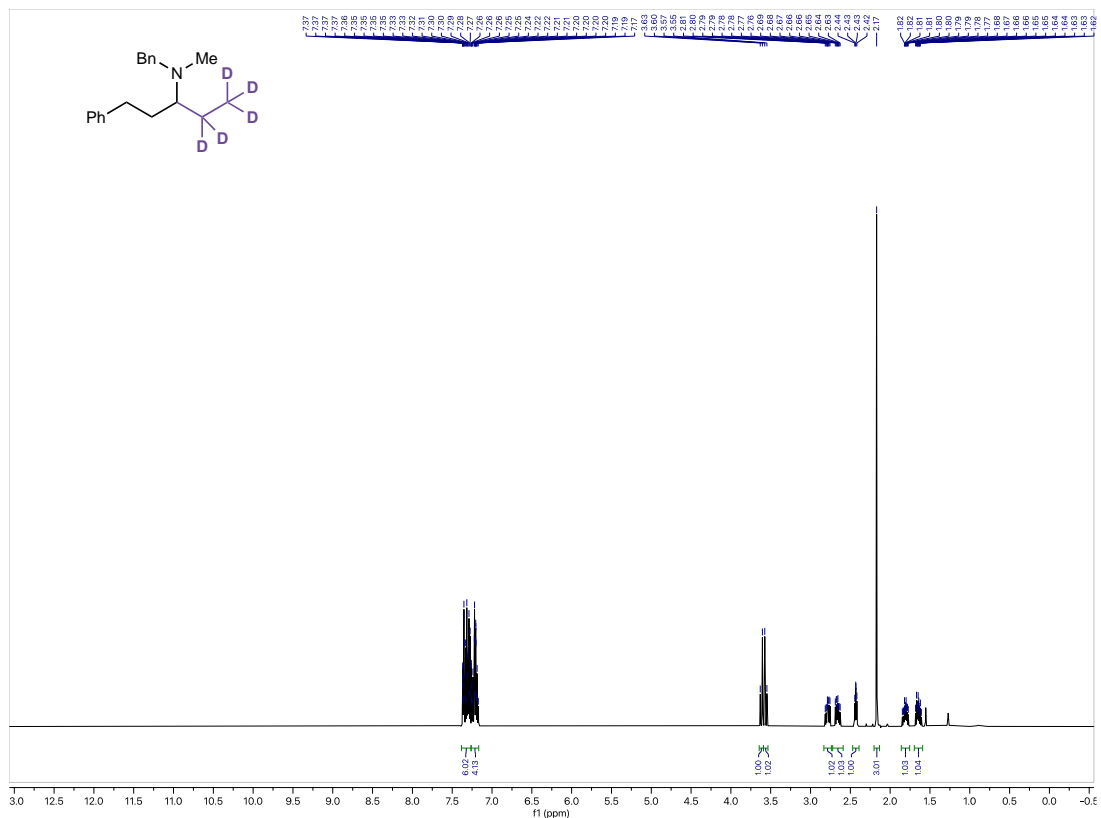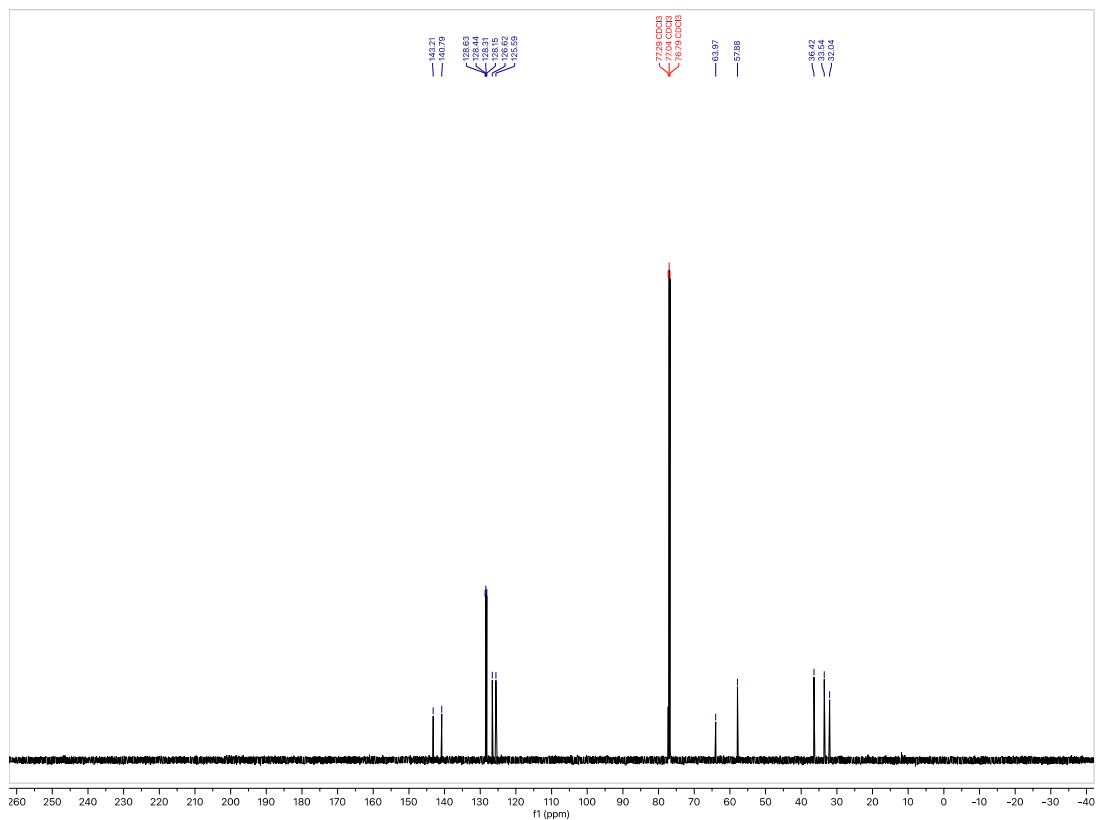

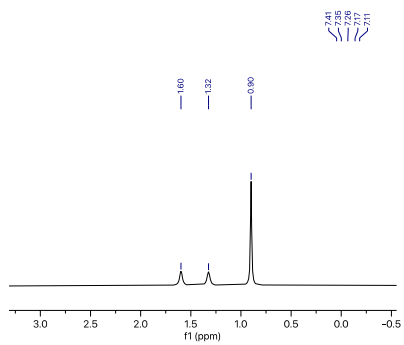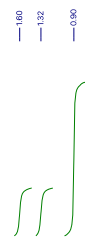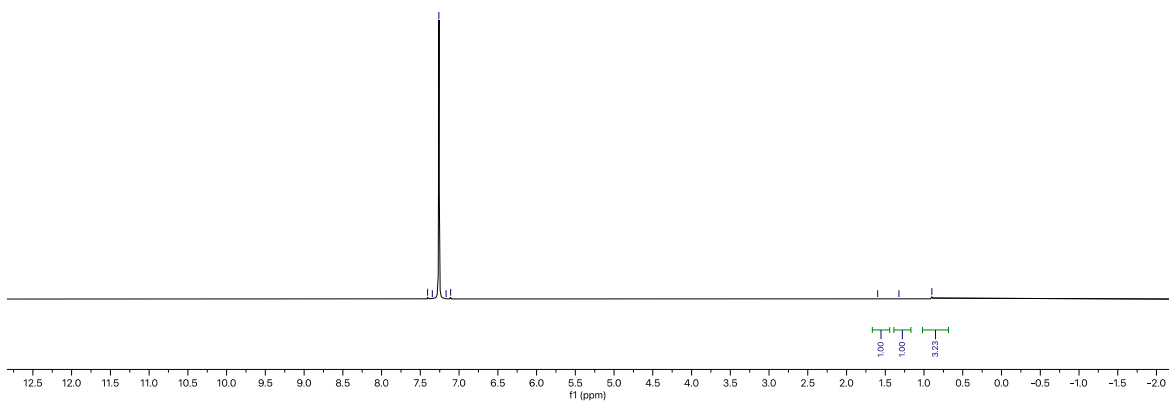



# 1-(1-phenylpentan-2-yl)pyrrolidine (Prolitane) (11h)

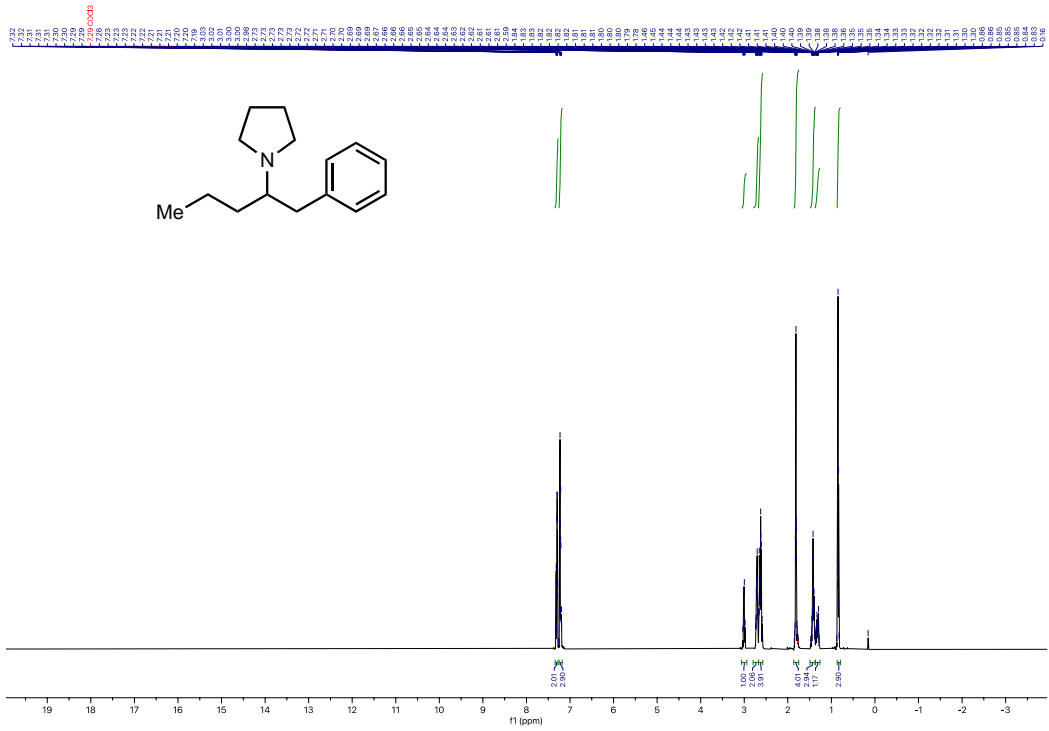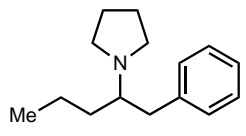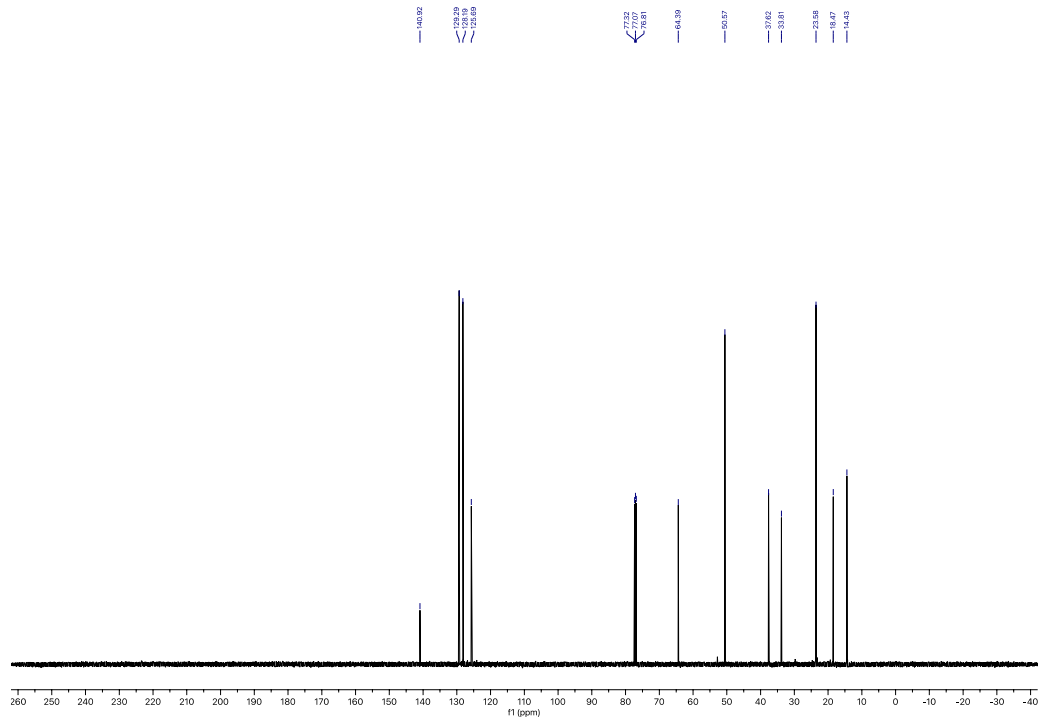

**N-Benzyl-N-methyl-1-phenyl-2methylpropan-1-amine (12a)**

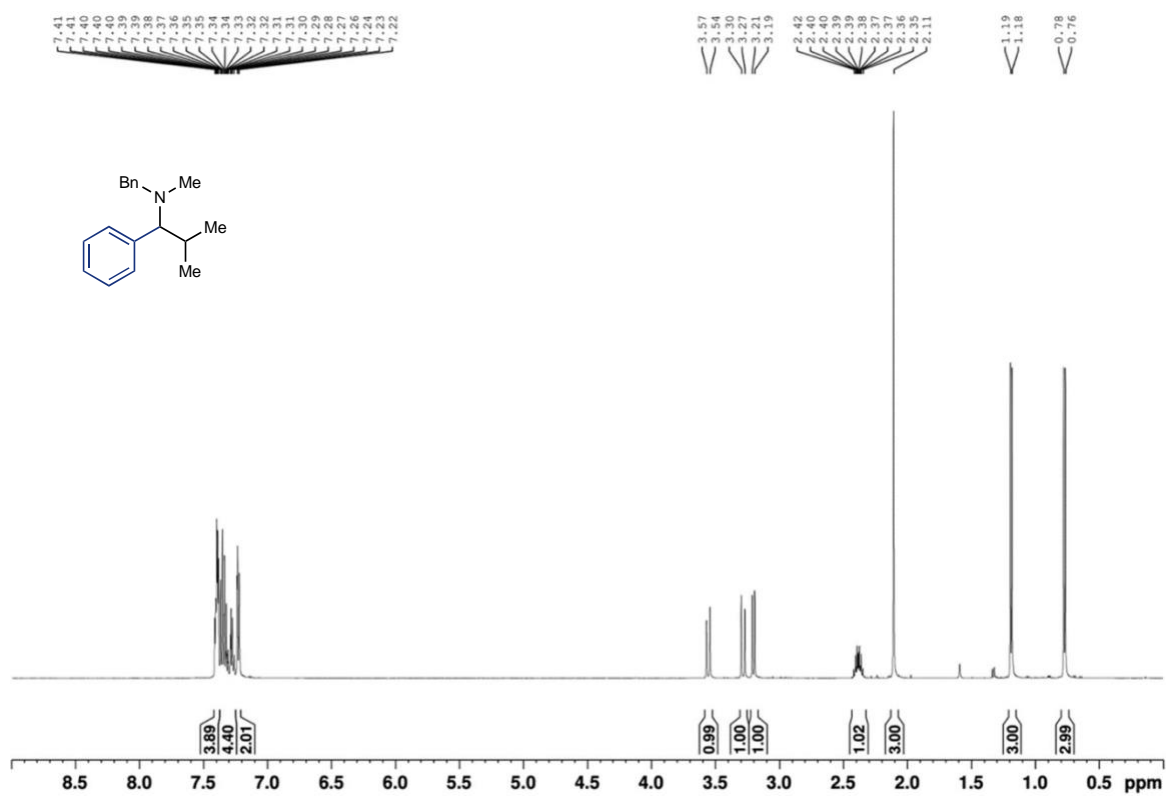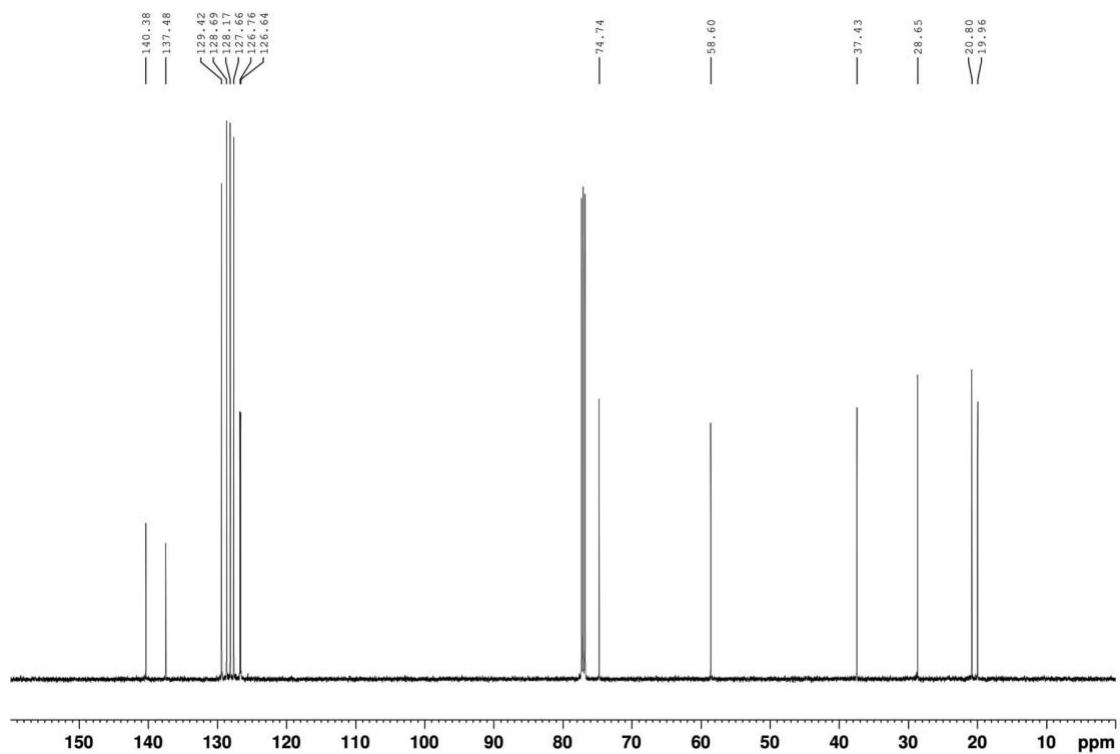

**methyl 4-(1-(benzyl(methyl)amino)-2-methylpropyl)benzoate (12b)**

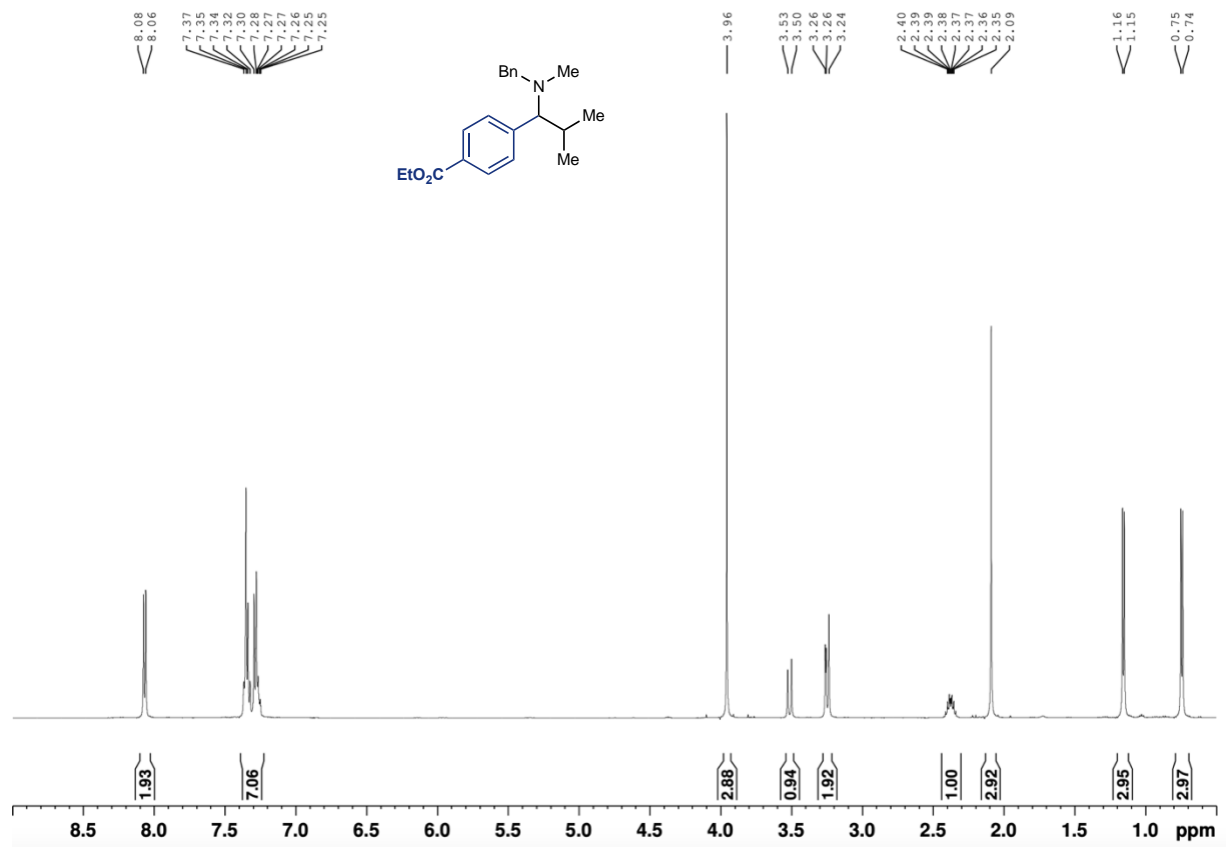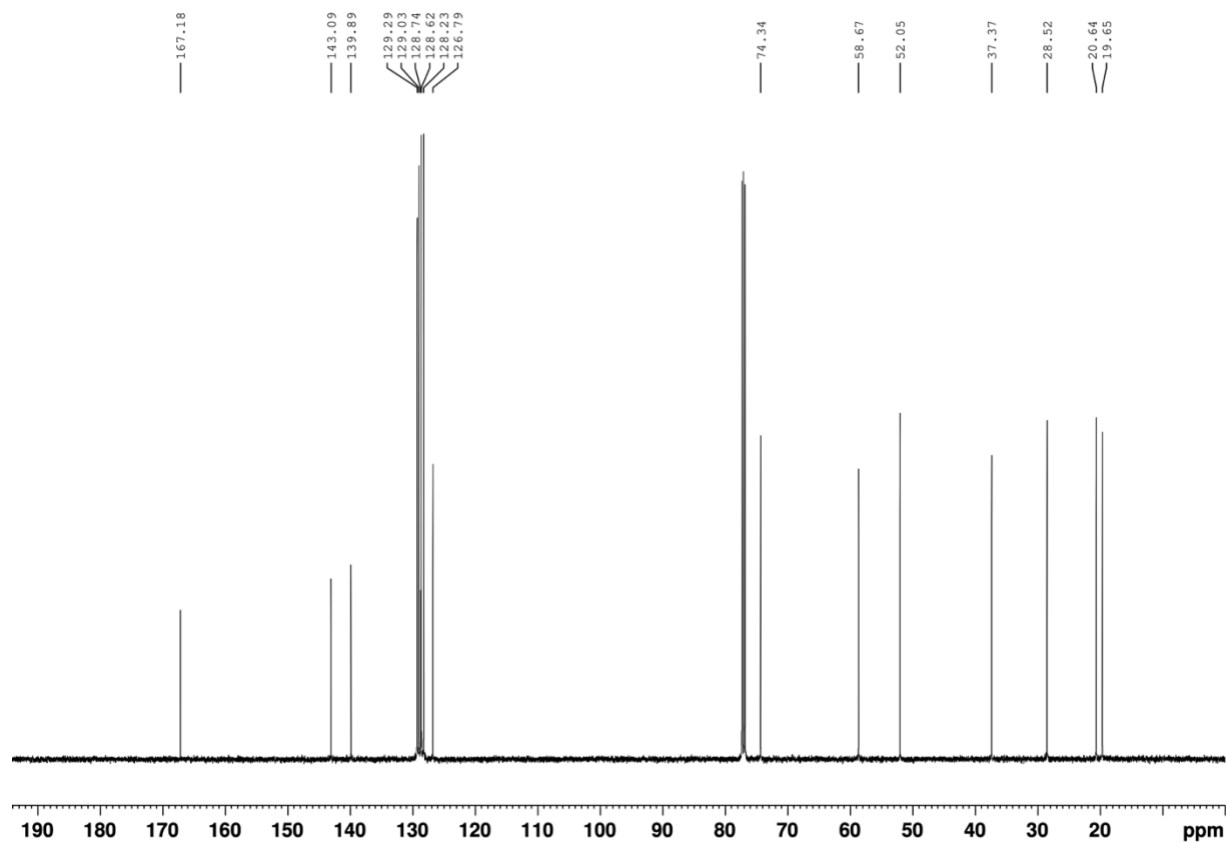



N-benzyl-1-(6-bromobenzo[d][1,3]dioxol-5-yl)-N,2-dimethylpropan-1-amine (12c)

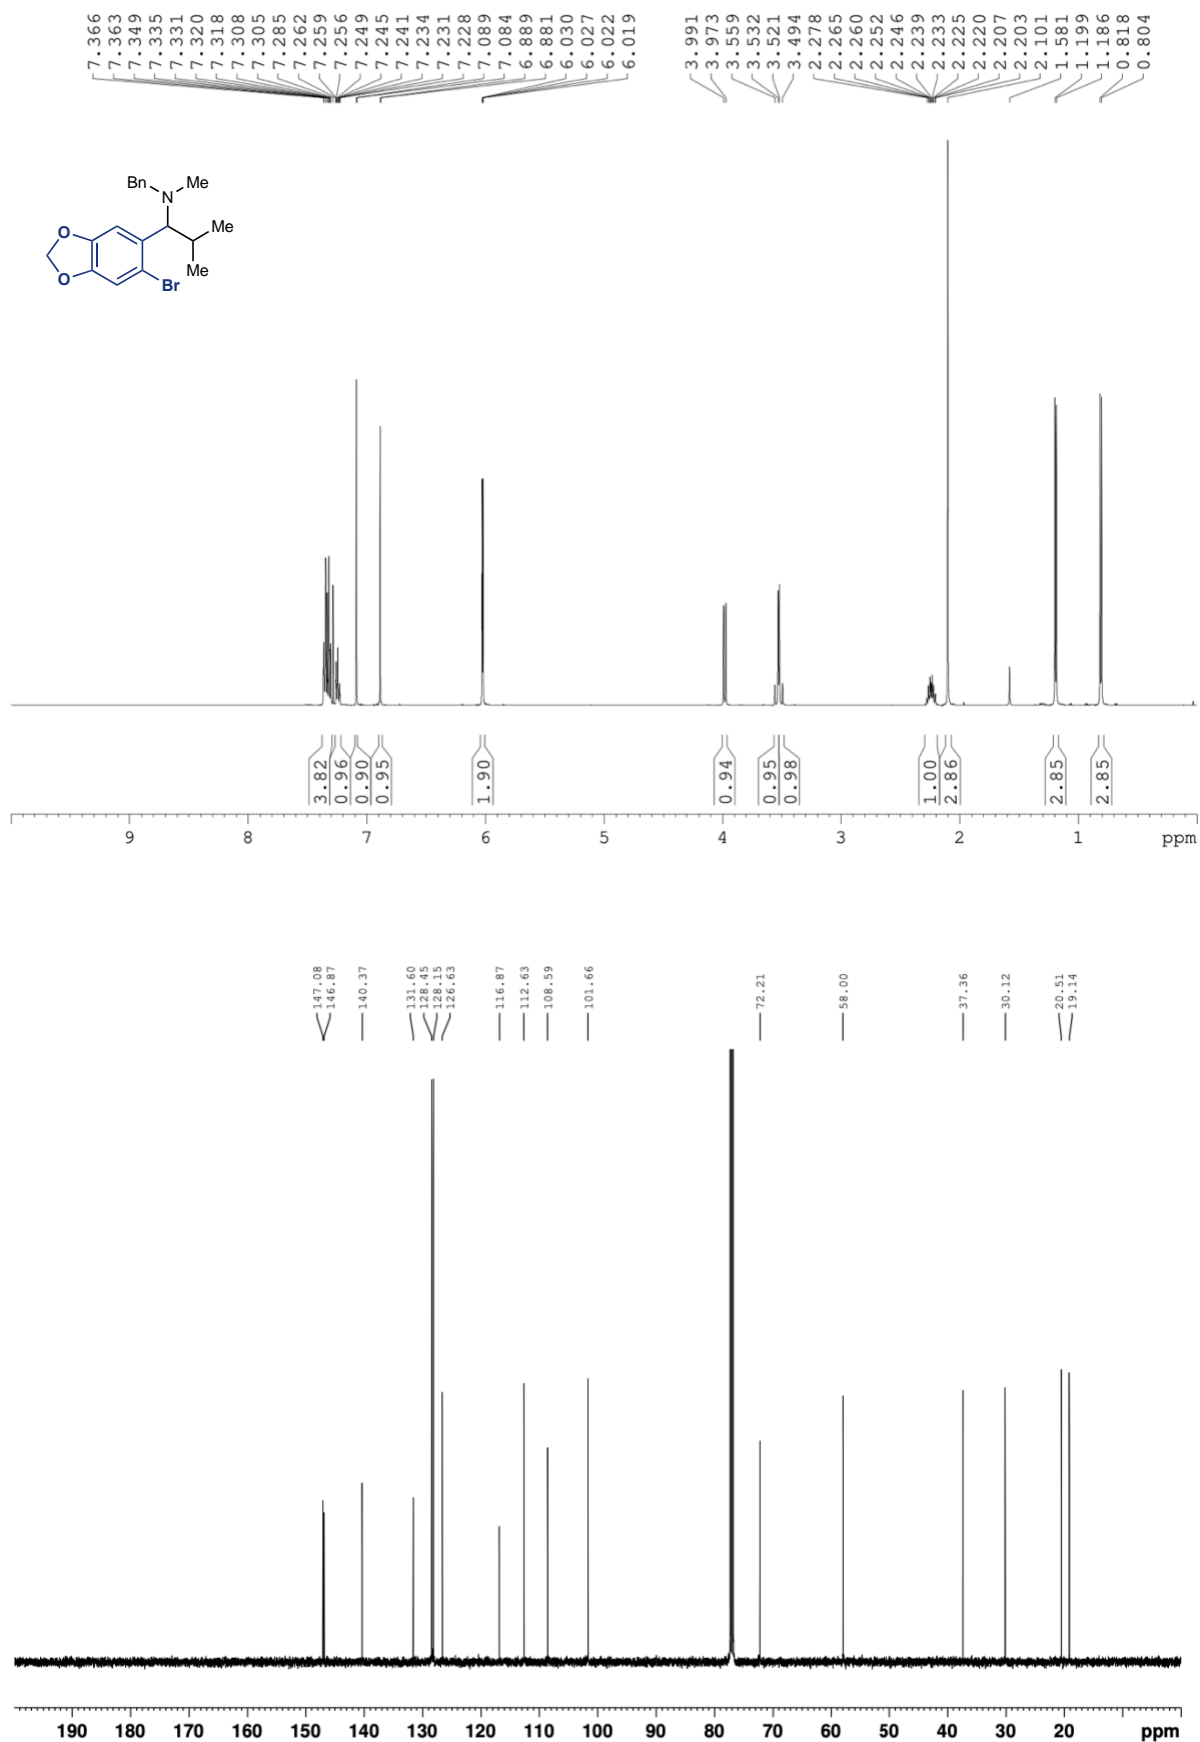

N-benzyl-N,2-dimethyl-1-(1-methyl-1H-pyrazol-4-yl)propan-1-amine (12d)

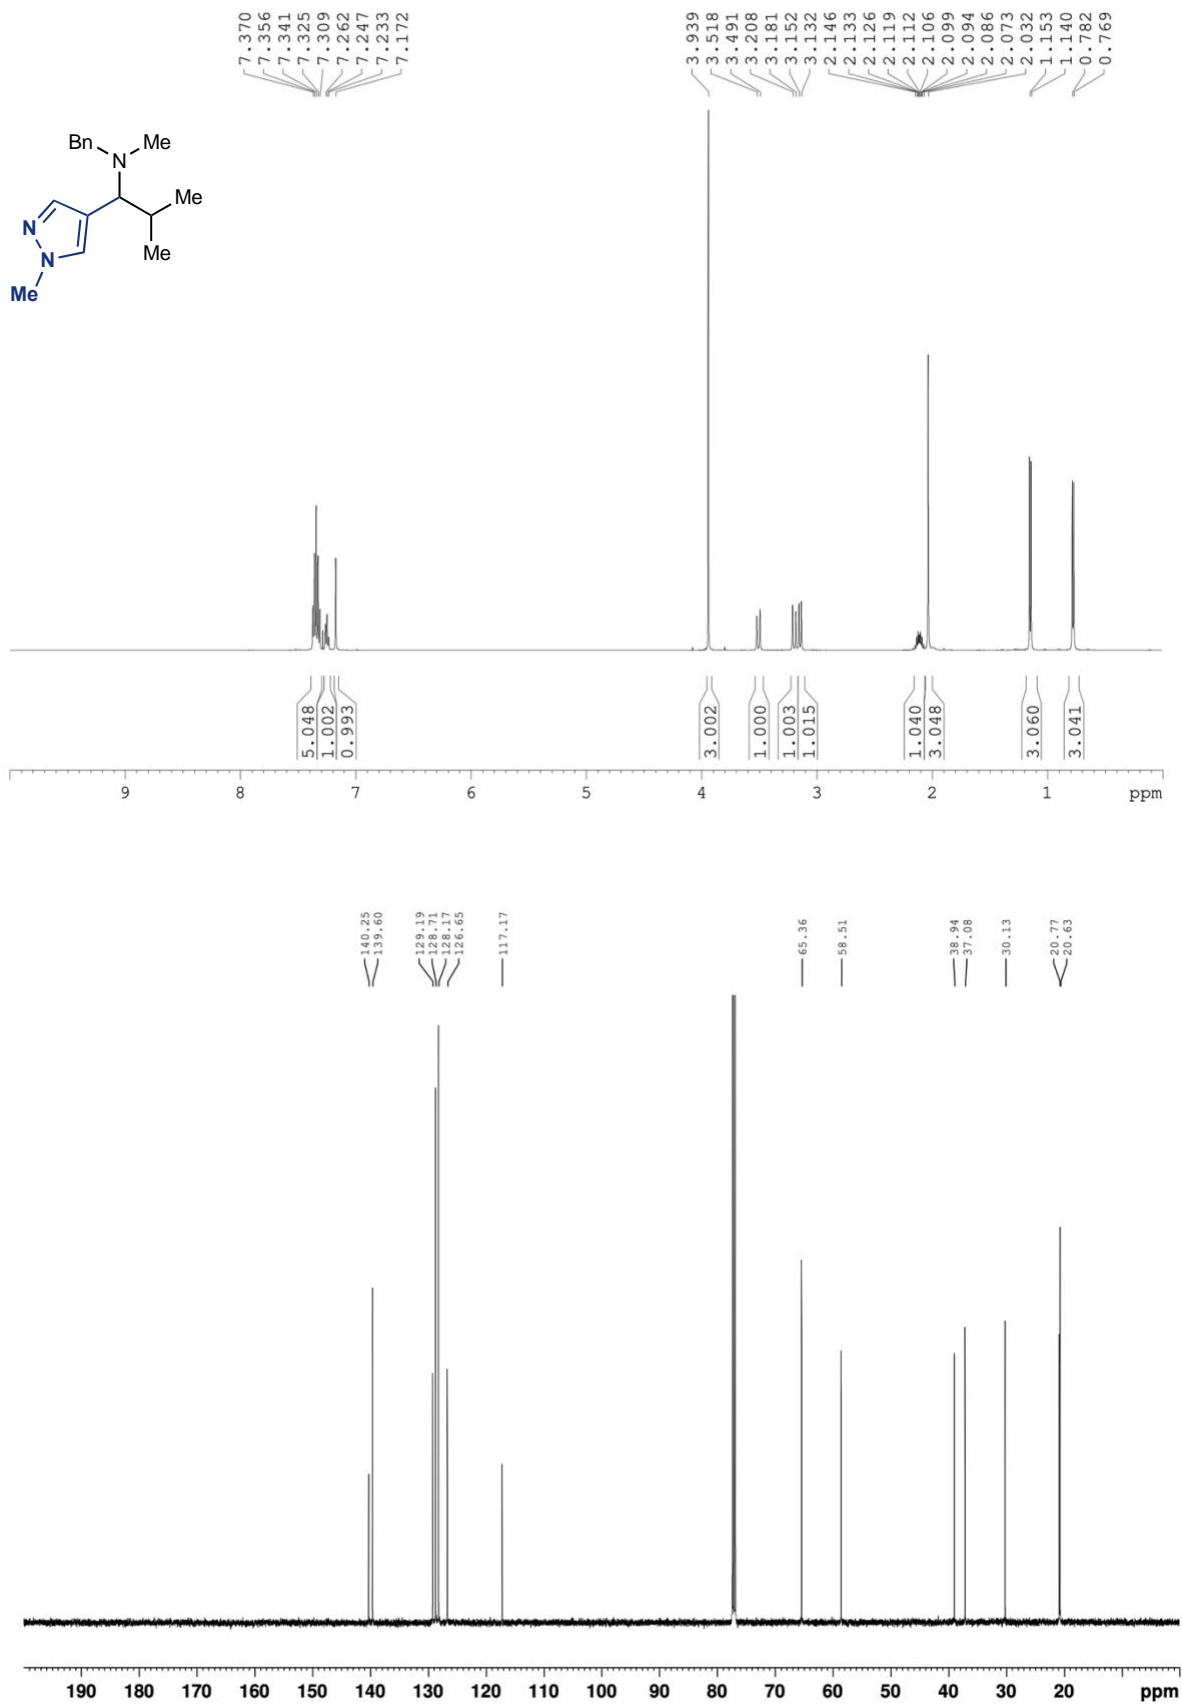

N-benzyl-1-(3,5-dimethylisoxazol-4-yl)-N,2-dimethylpropan-1-amine (12e)

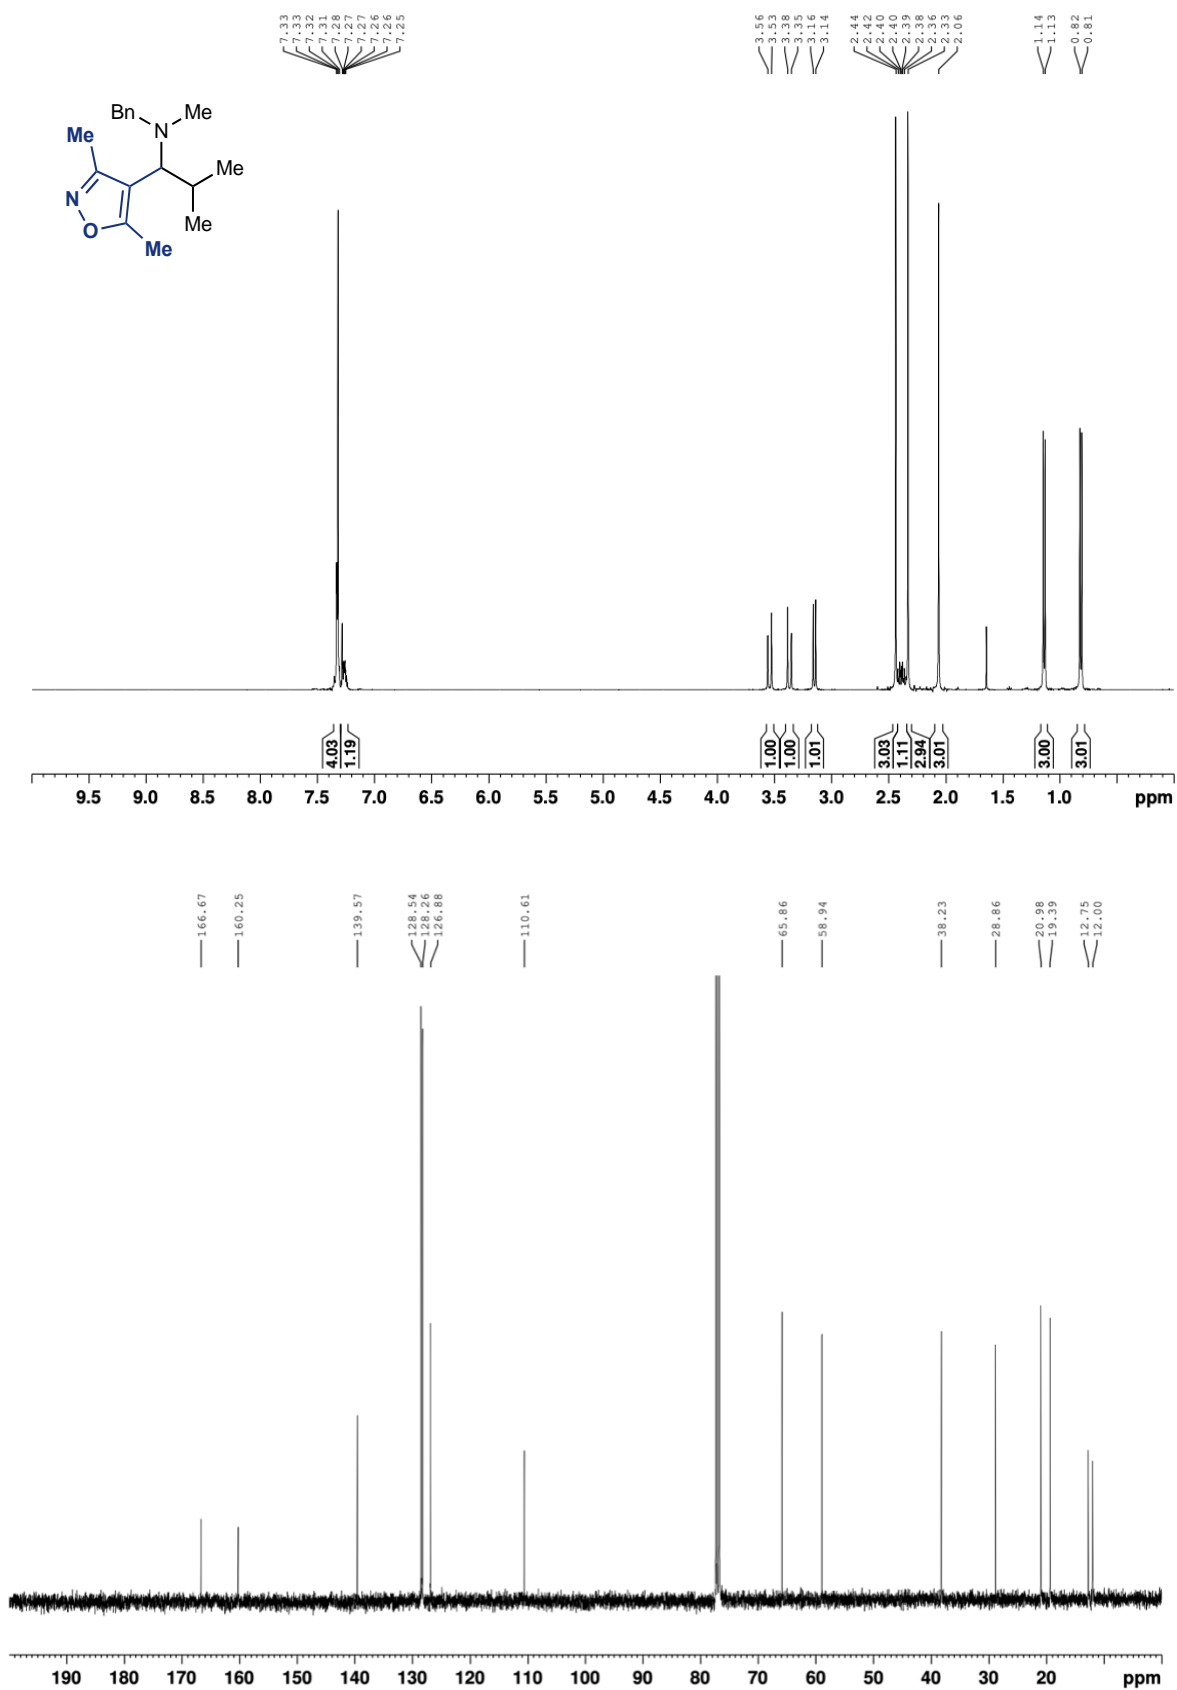

N-benzyl-1-(6-bromopyridin-2-yl)-N,2-dimethylpropan-1-amine (12f)

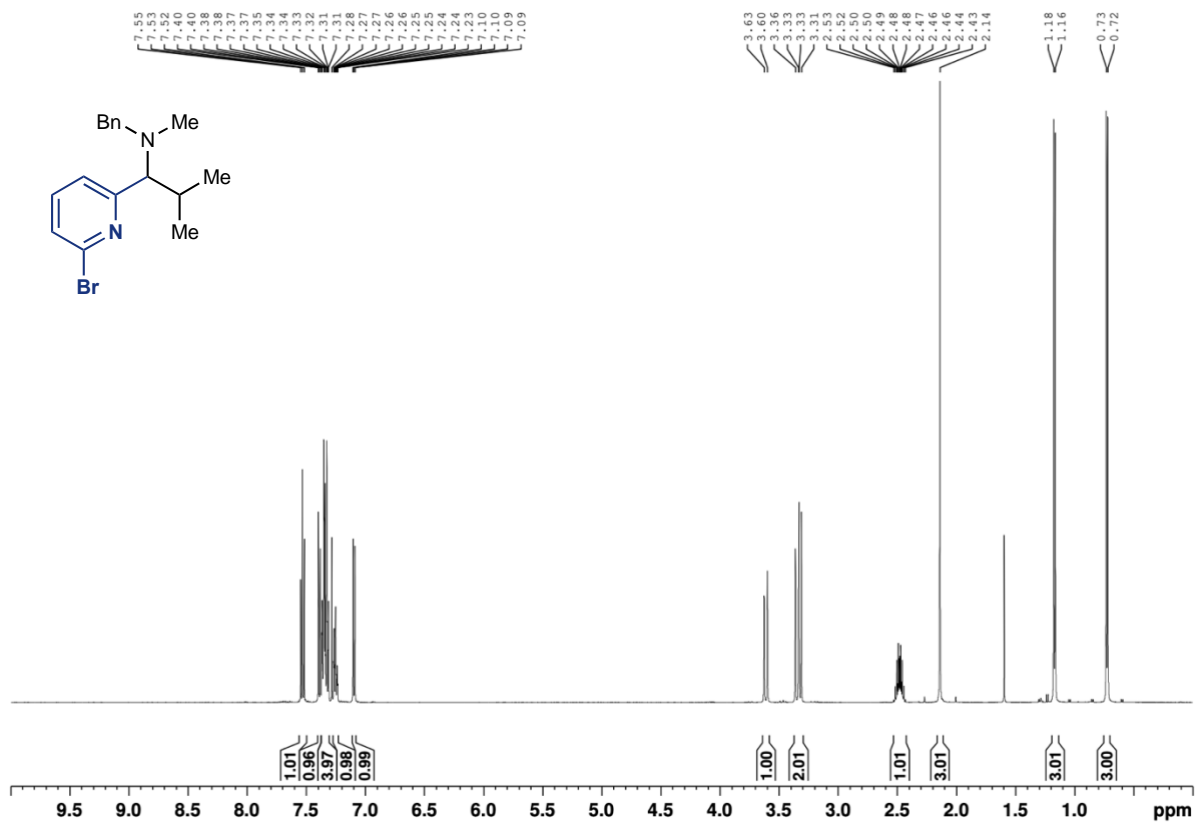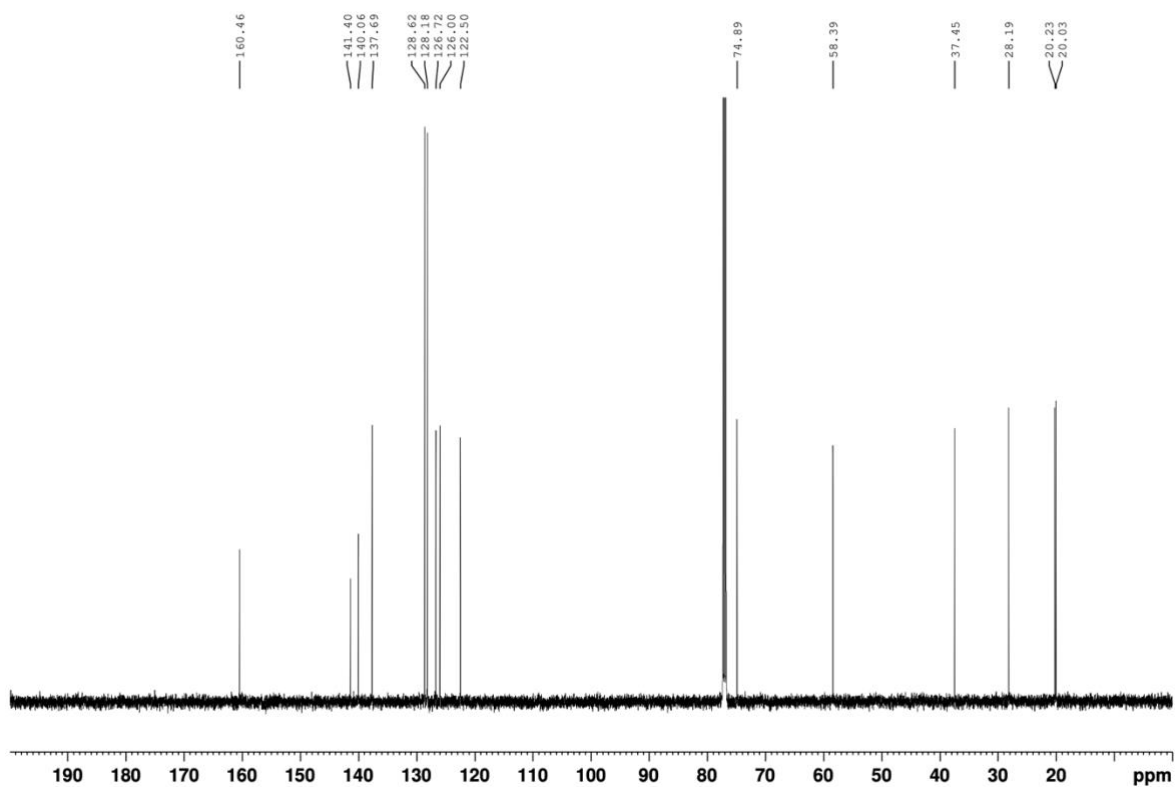

N-benzyl-1-(3-(4-bromophenyl)isoxazol-5-yl)-N,2-dimethylpropan-1-amine (12g)

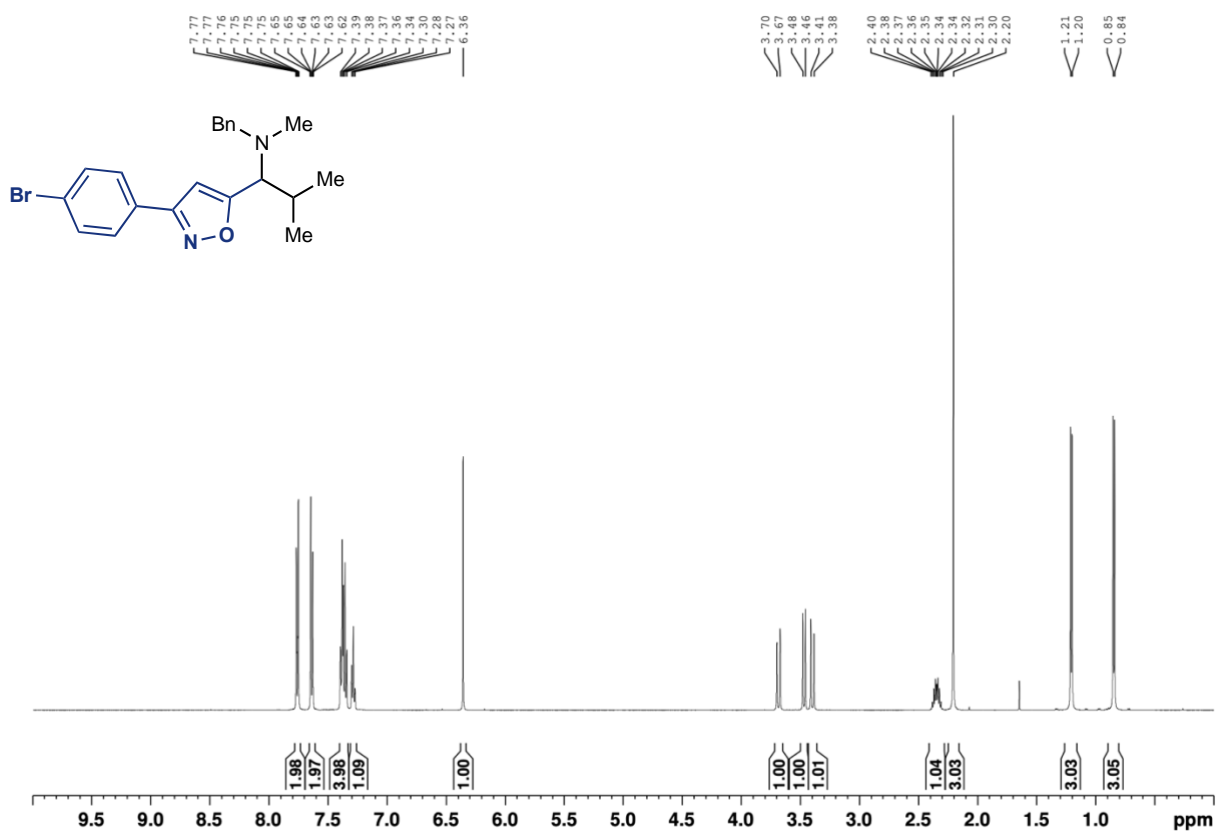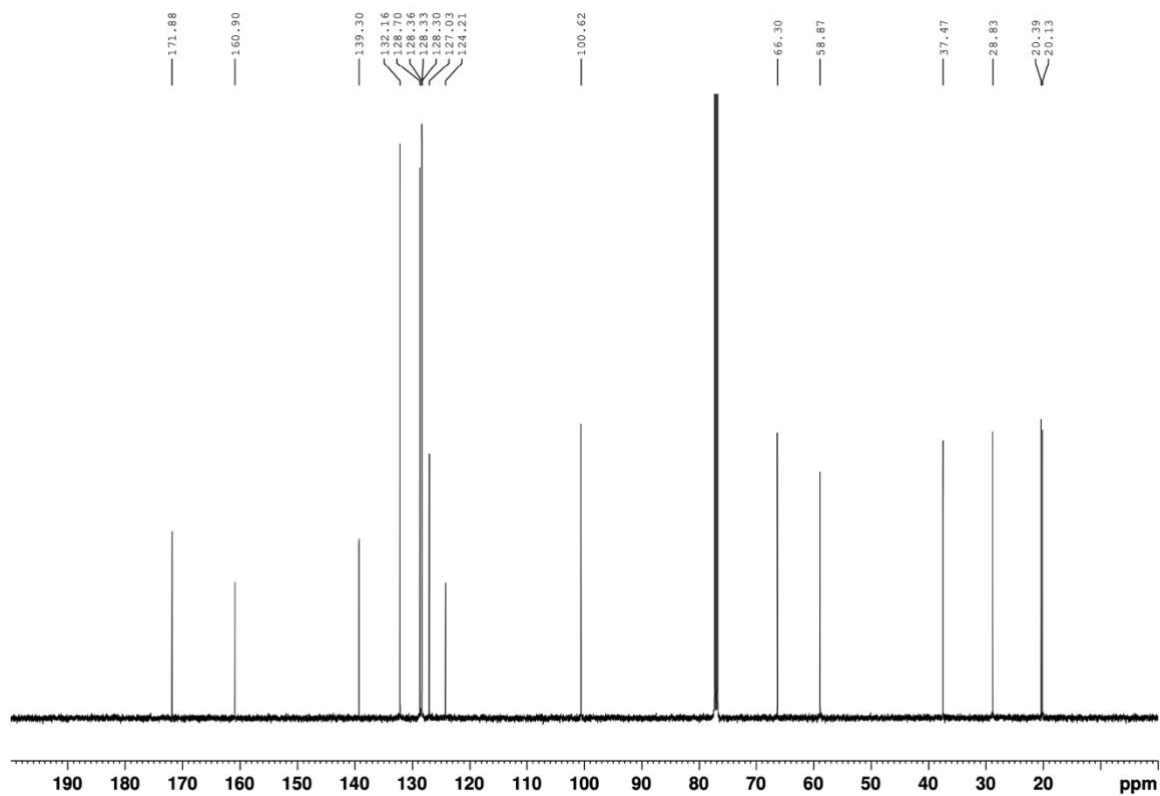

**(4-(2-methyl-1-phenylpropyl)piperazin-1-yl)(naphthalen-2-yl)methanone (14a)**

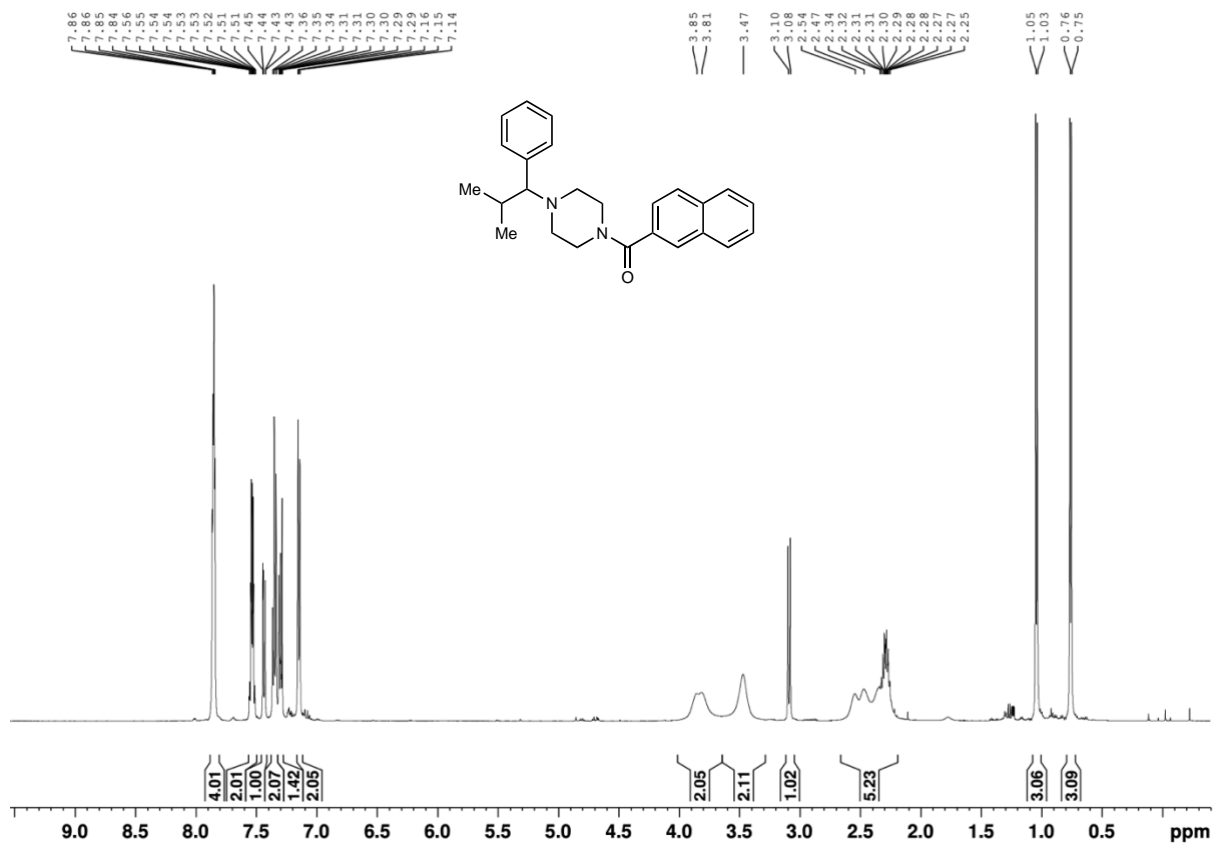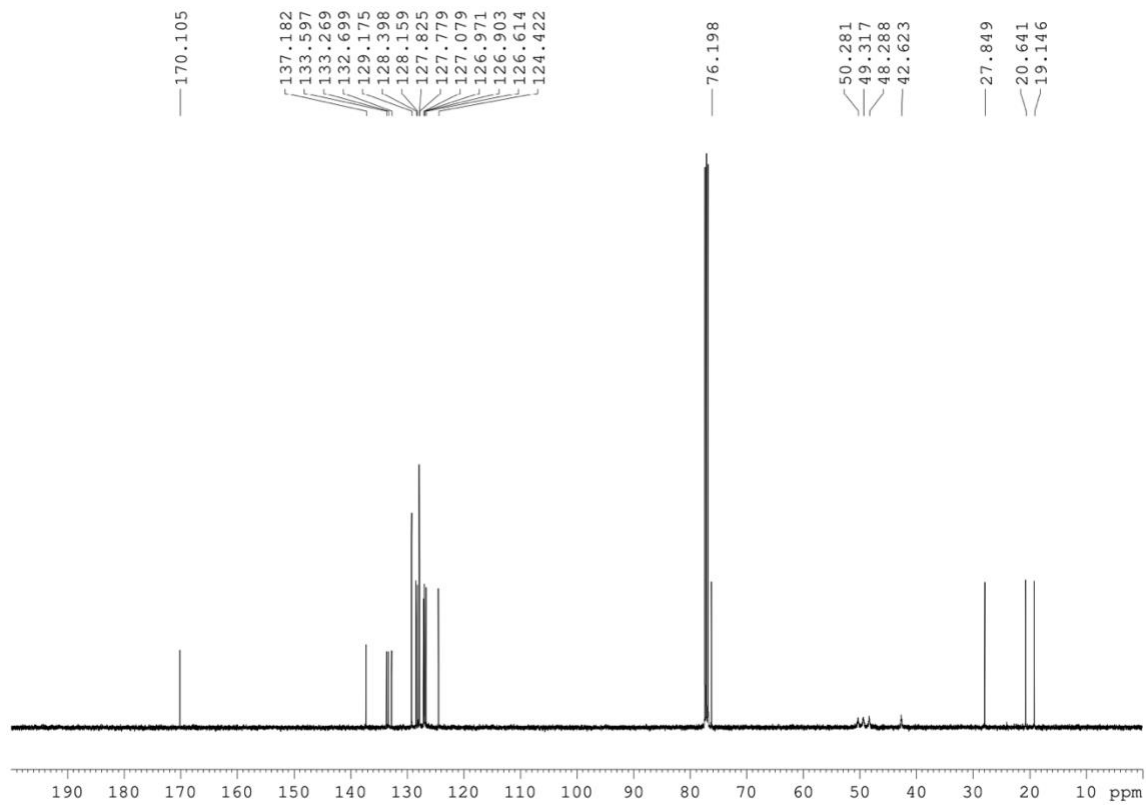

# 4,5,6,7-tetrachloro-1,3-dioxisoindolin-2-yl pivalate (15c)

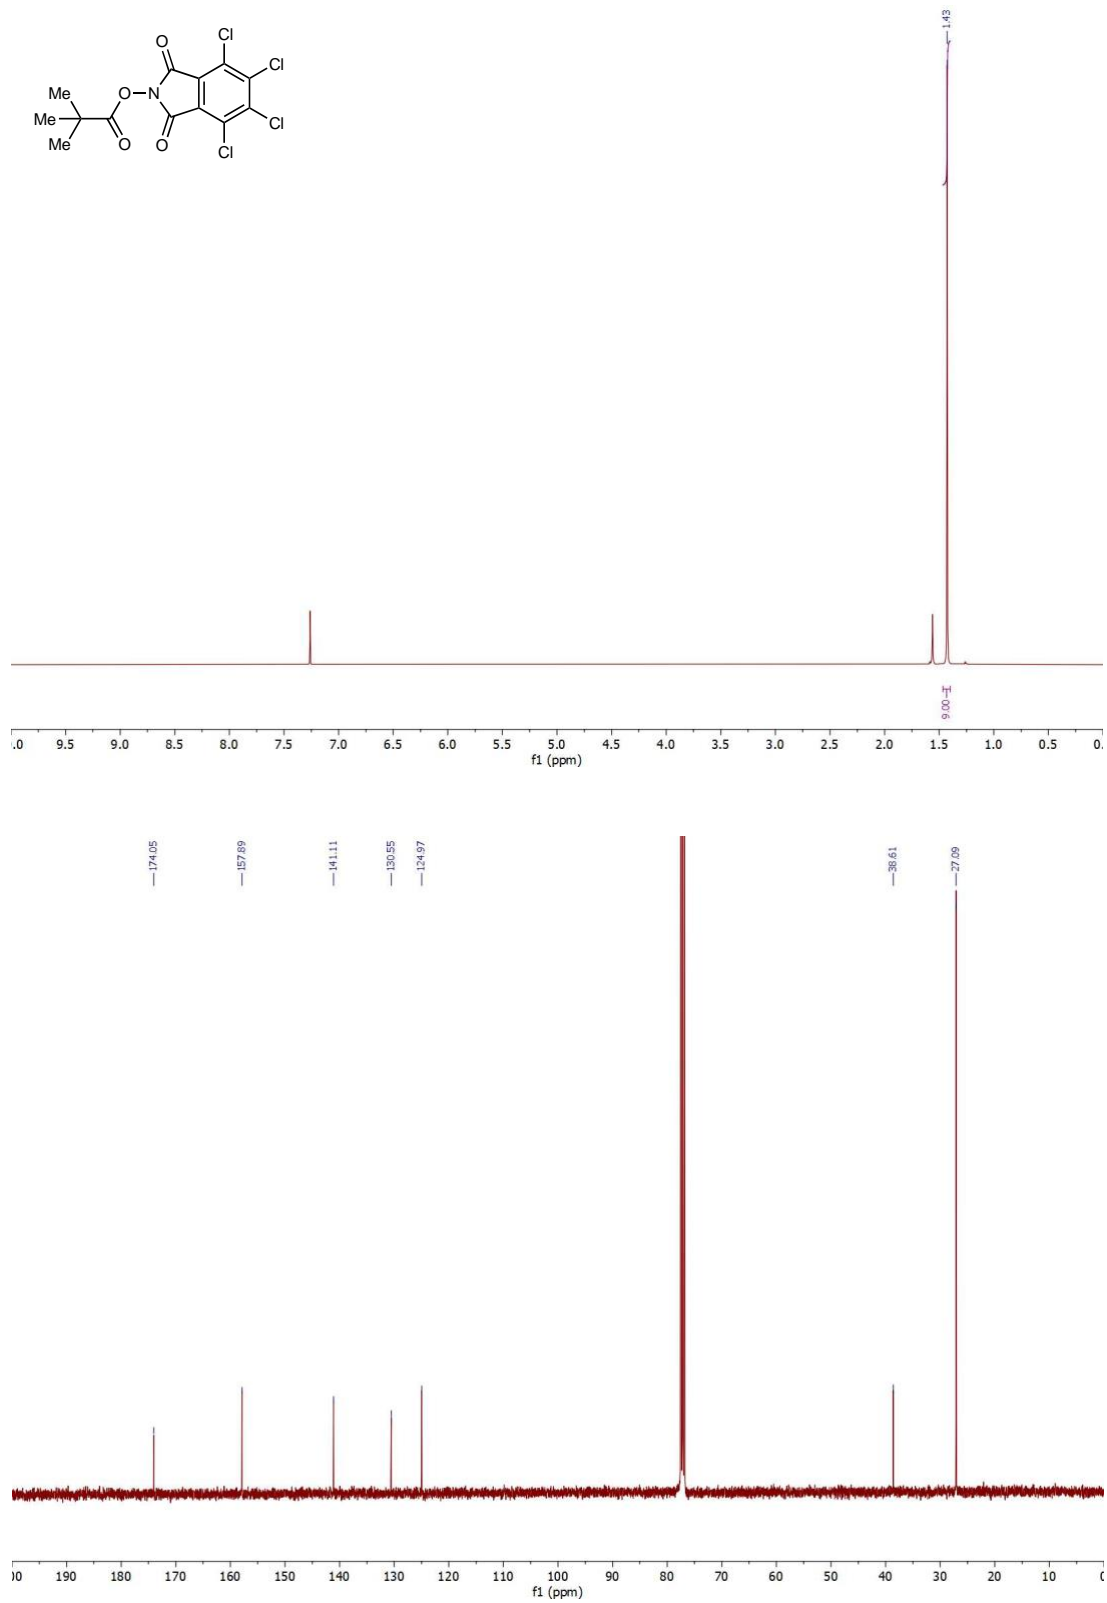

4,5,6,7-tetrachloro-1,3-dioxoisindolin-2-yl acetate (15d)

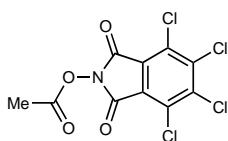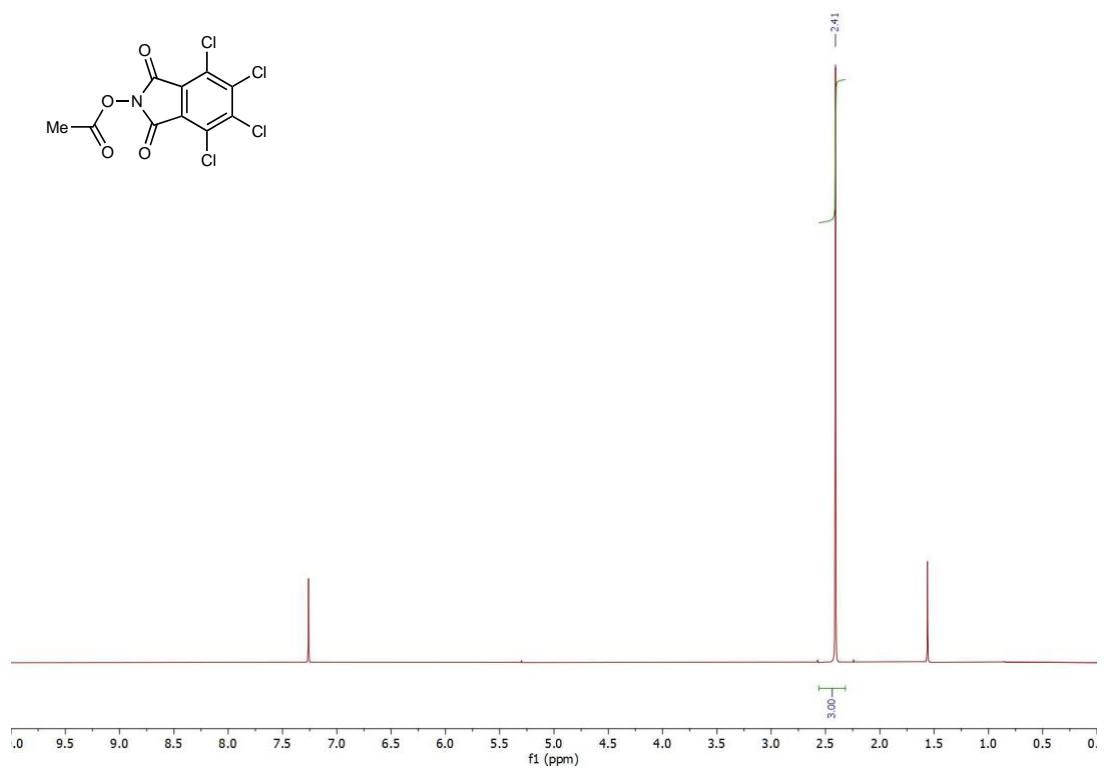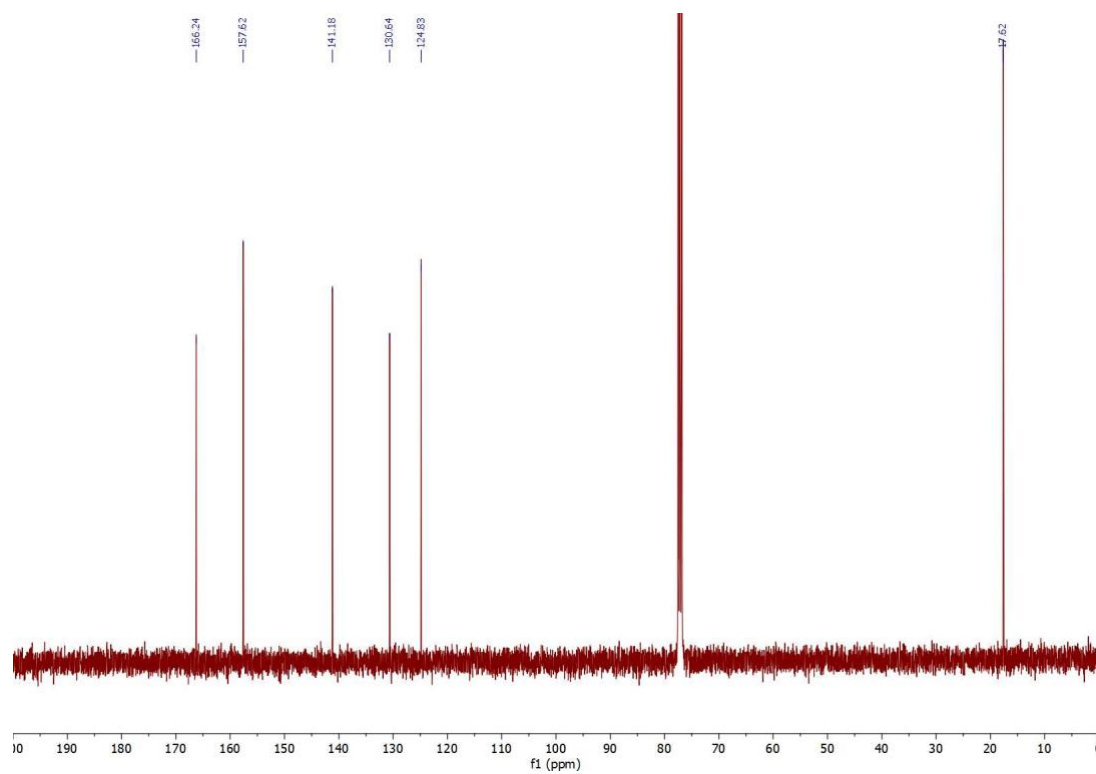



4,5,6,7-tetrachloro-1,3-dioxisoindolin-2-yl cycloheptanecarboxylate (15i)

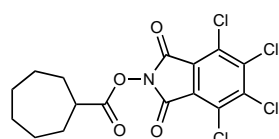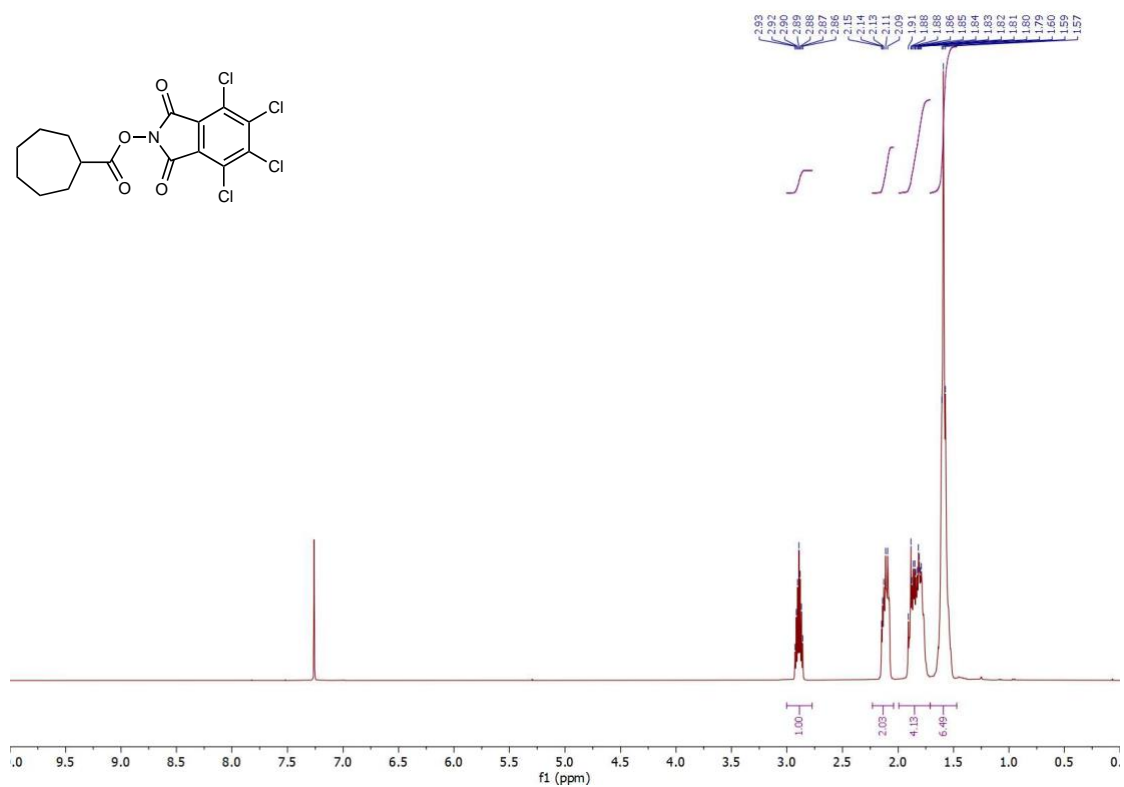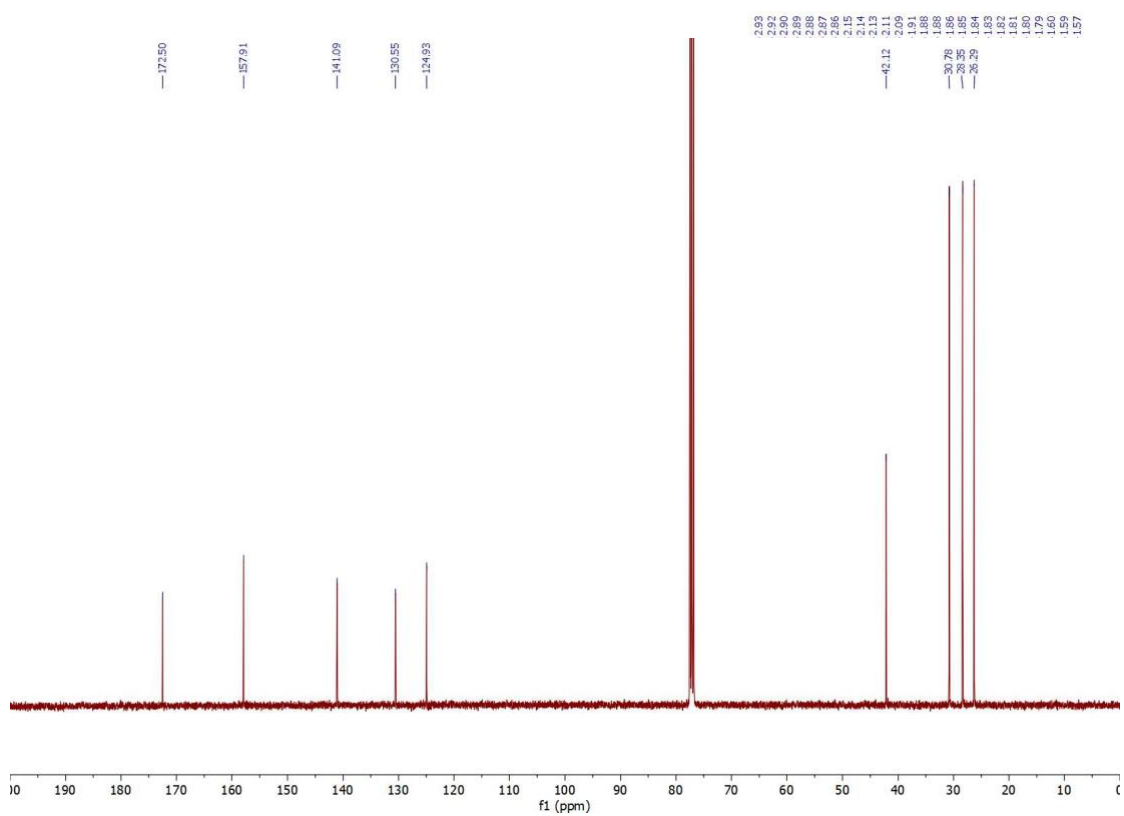

# 4,5,6,7-tetrachloro-1,3-dioxisoindolin-2-yl 3-oxocyclobutane-1-carboxylate (15j)

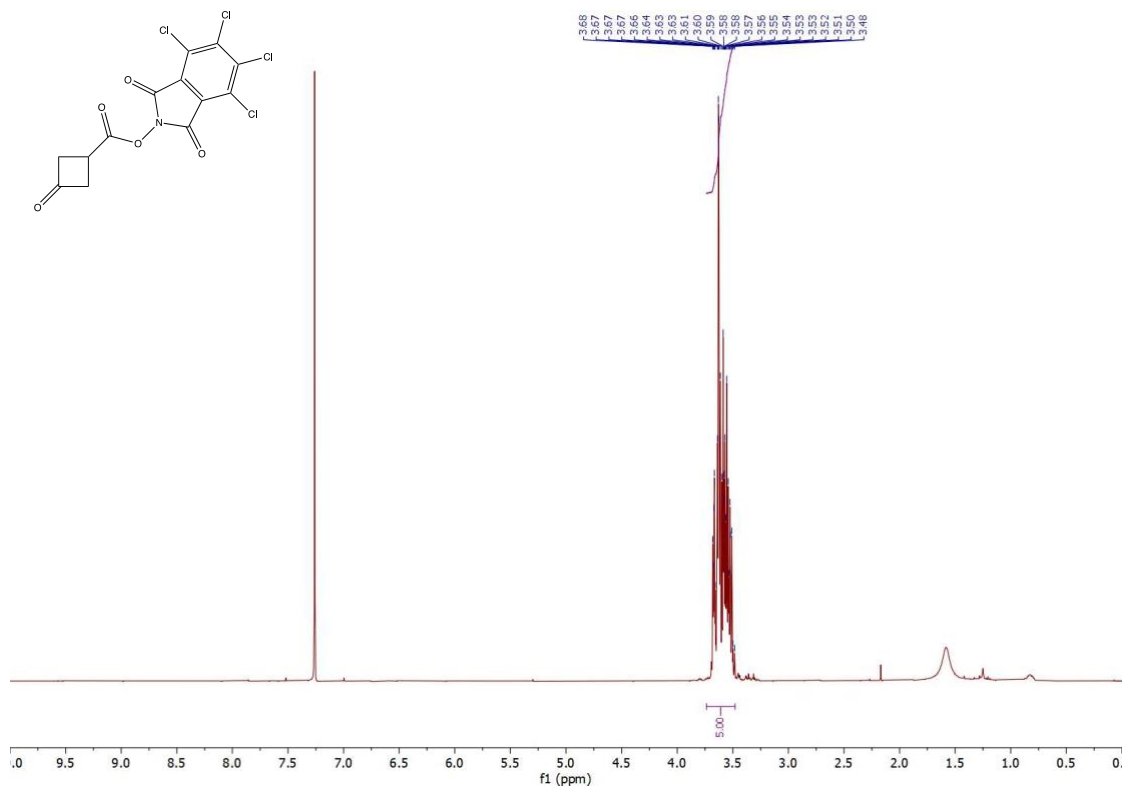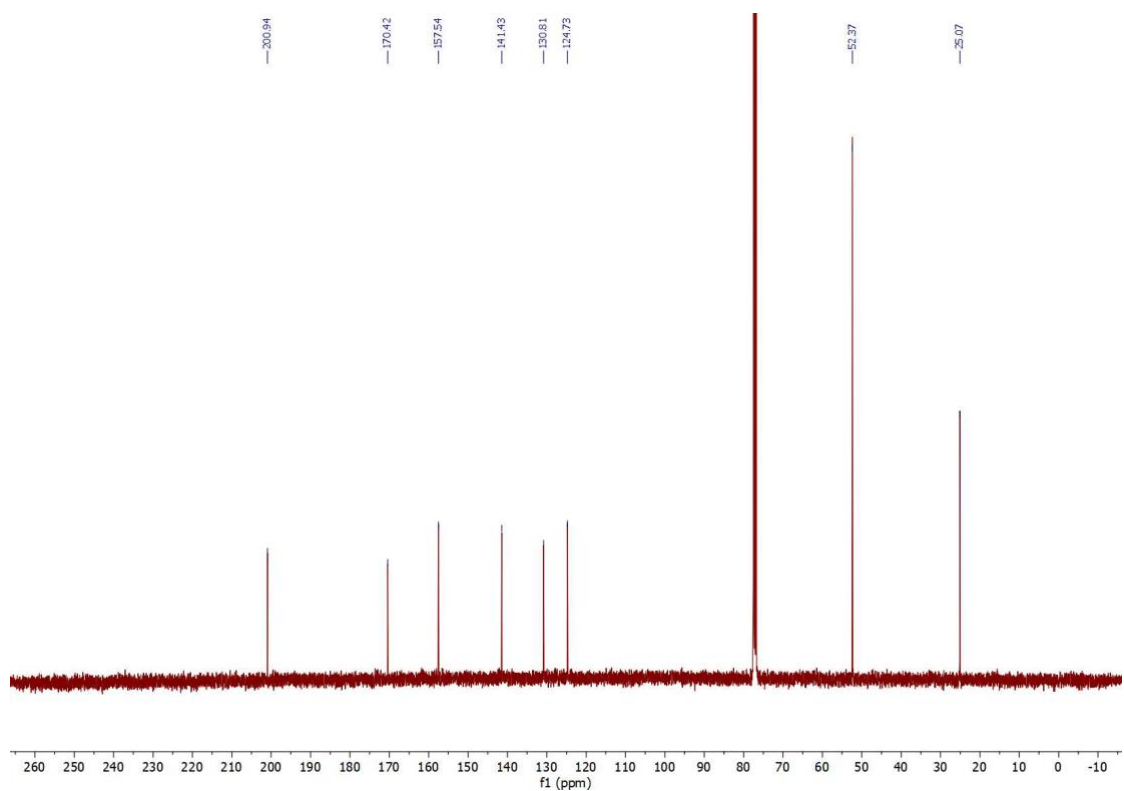

4,5,6,7-tetrachloro-1,3-dioxisoindolin-2-yl 3,3-difluorocyclobutane-1-carboxylate (15k)

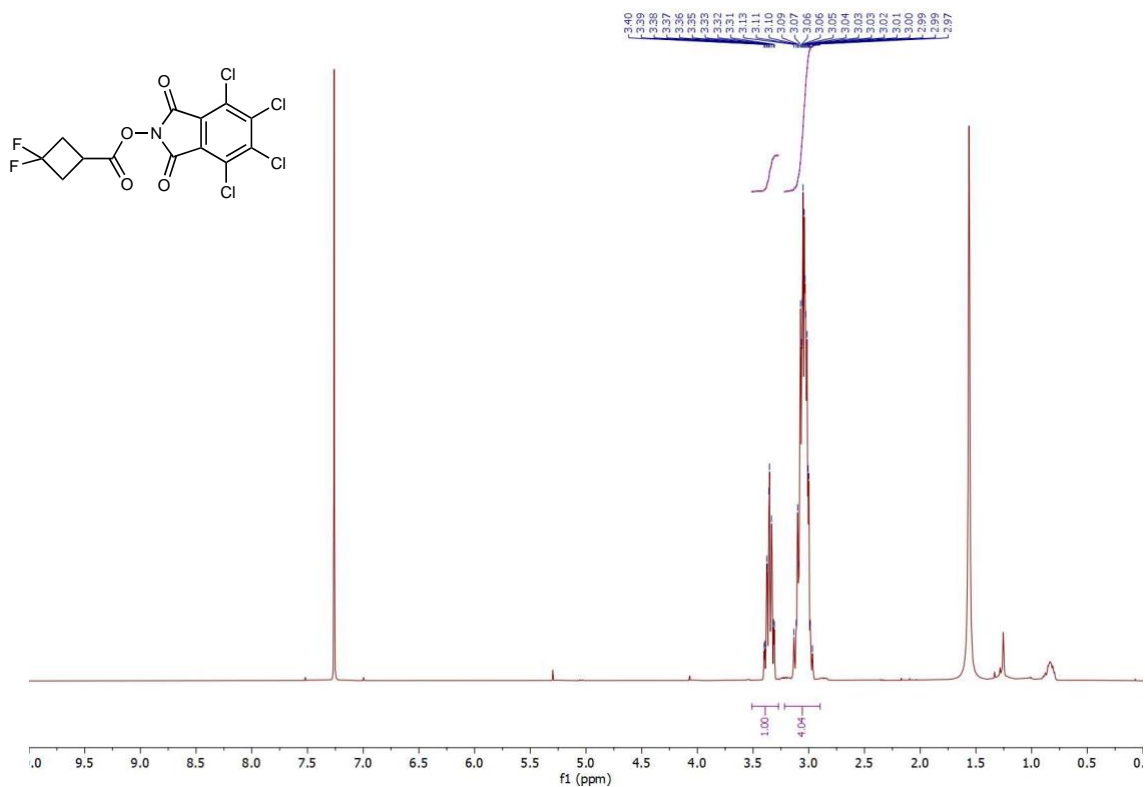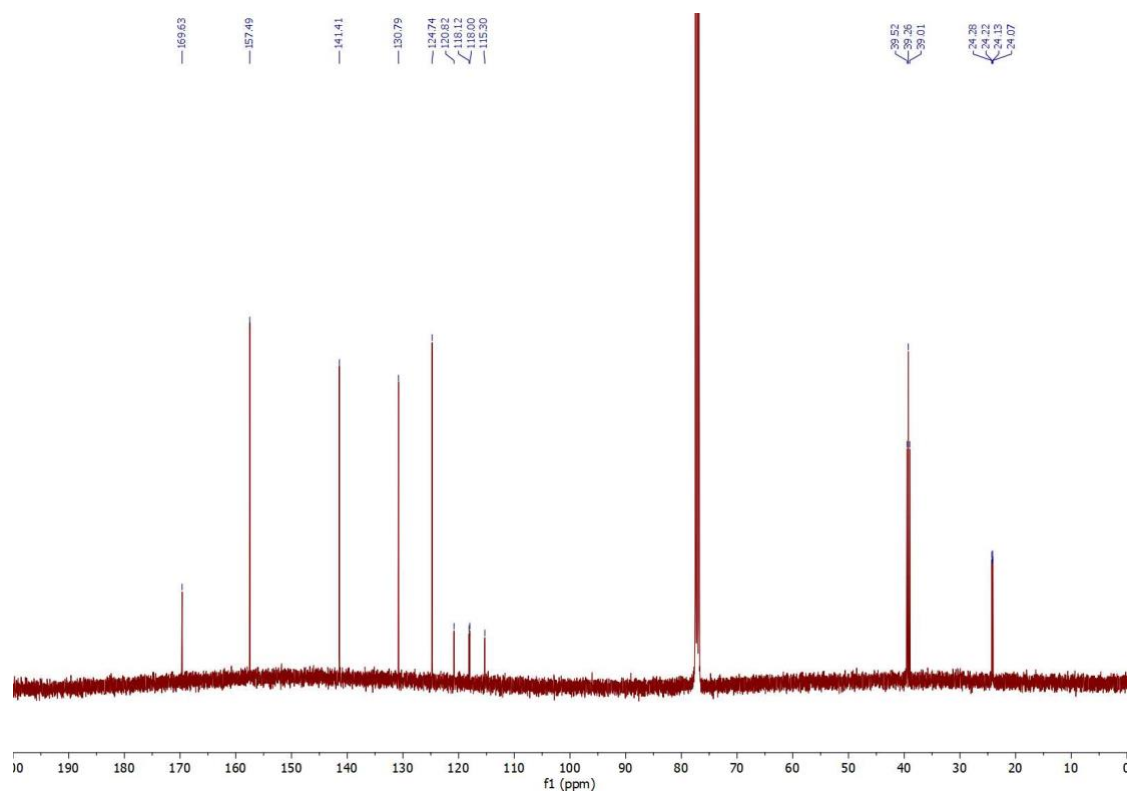

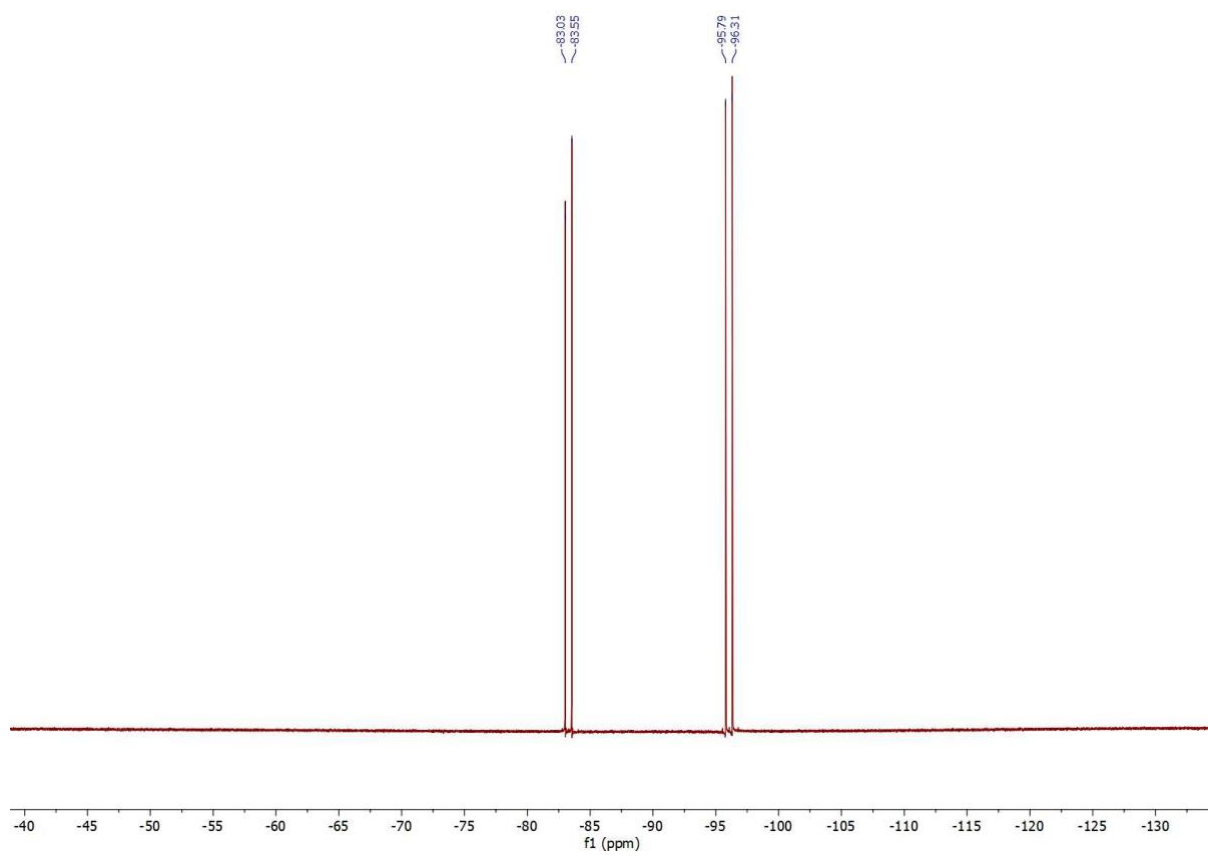

4,5,6,7-tetrachloro-1,3-dioxisoindolin-2-yl 3-methoxypropanoate (15I)

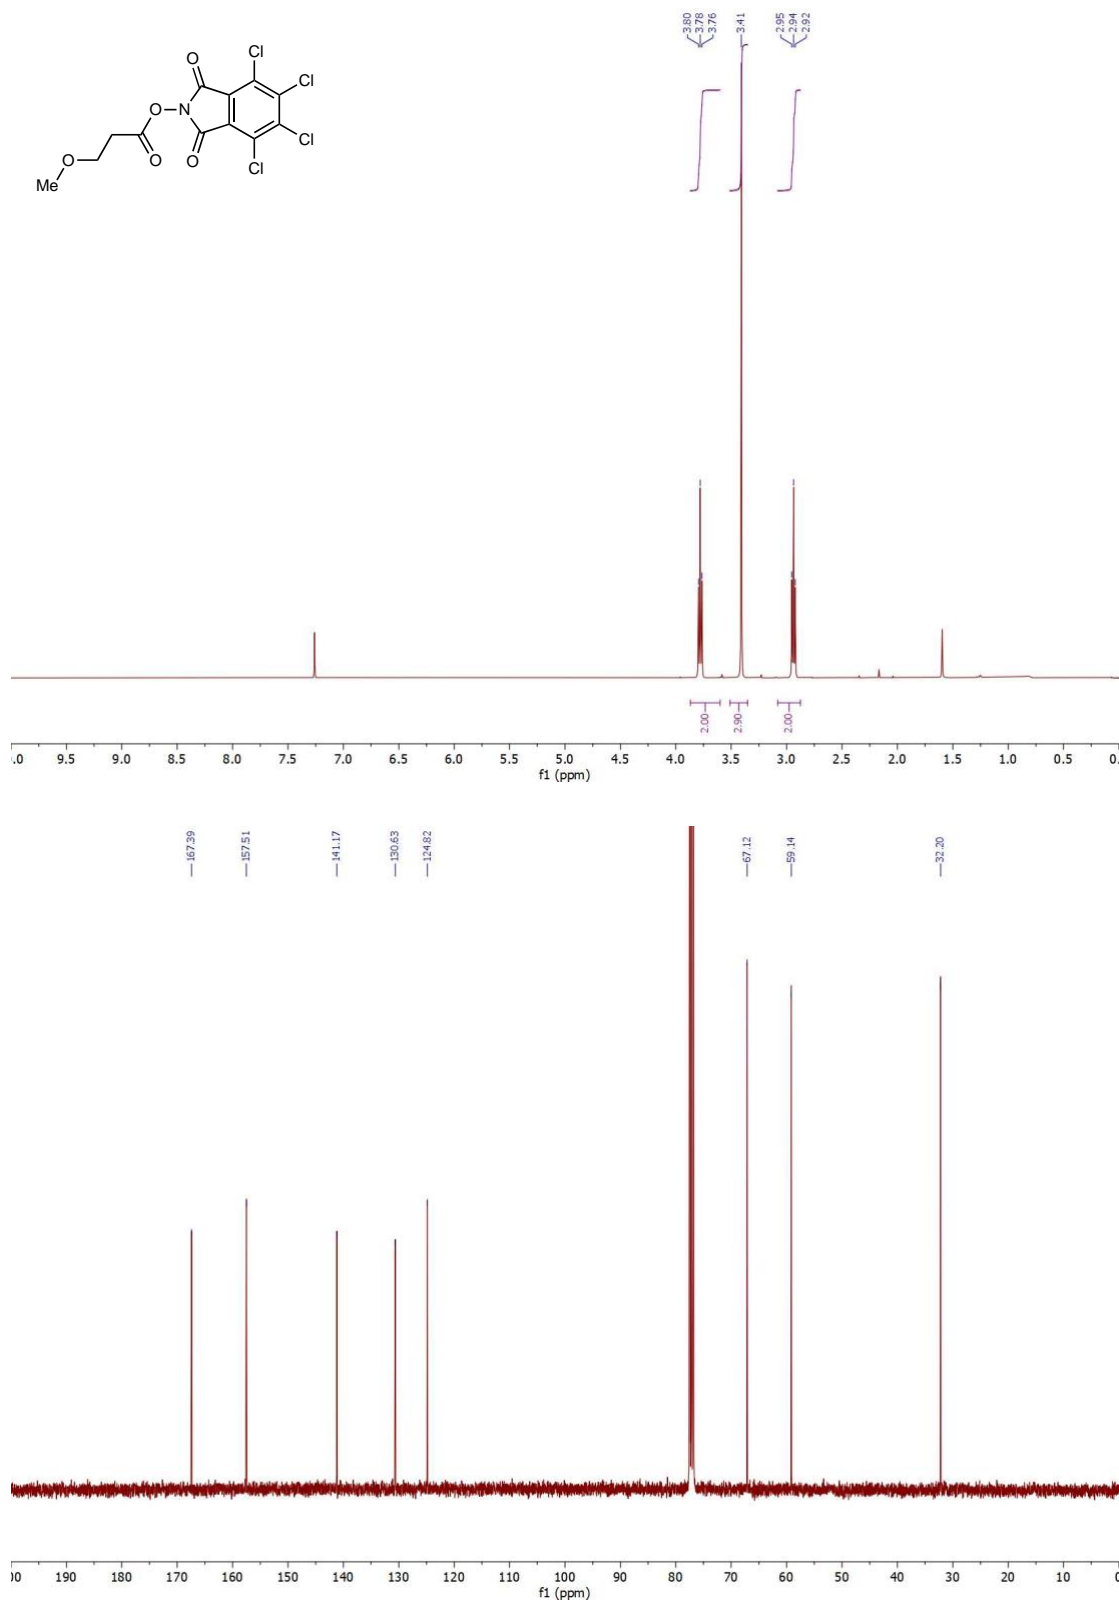

### 4,5,6,7-Tetrachloro-1,3-dioxoisindolin-2-yl 2-(methylthio)acetate (15l)

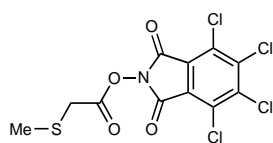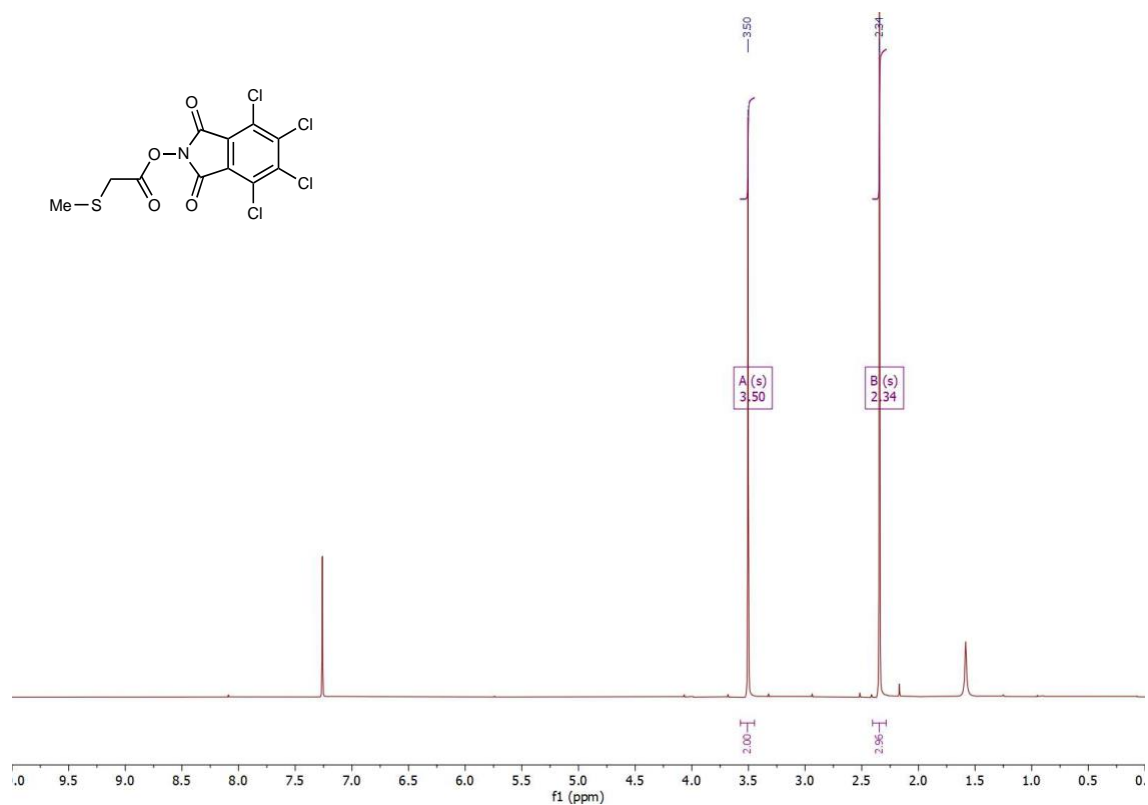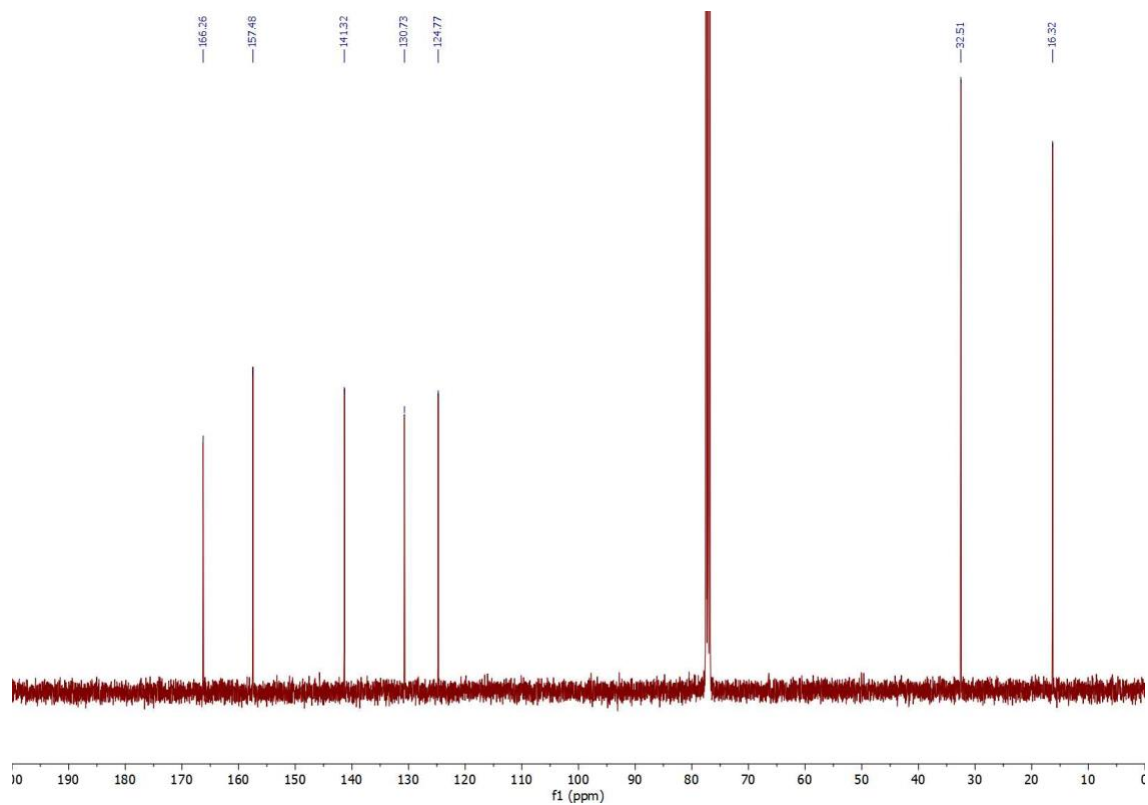

4,5,6,7-Tetrachloro-1,3-dioxisoindolin-2-yl 2-(1,3-dioxisoindolin-2-yl)acetate (15m)

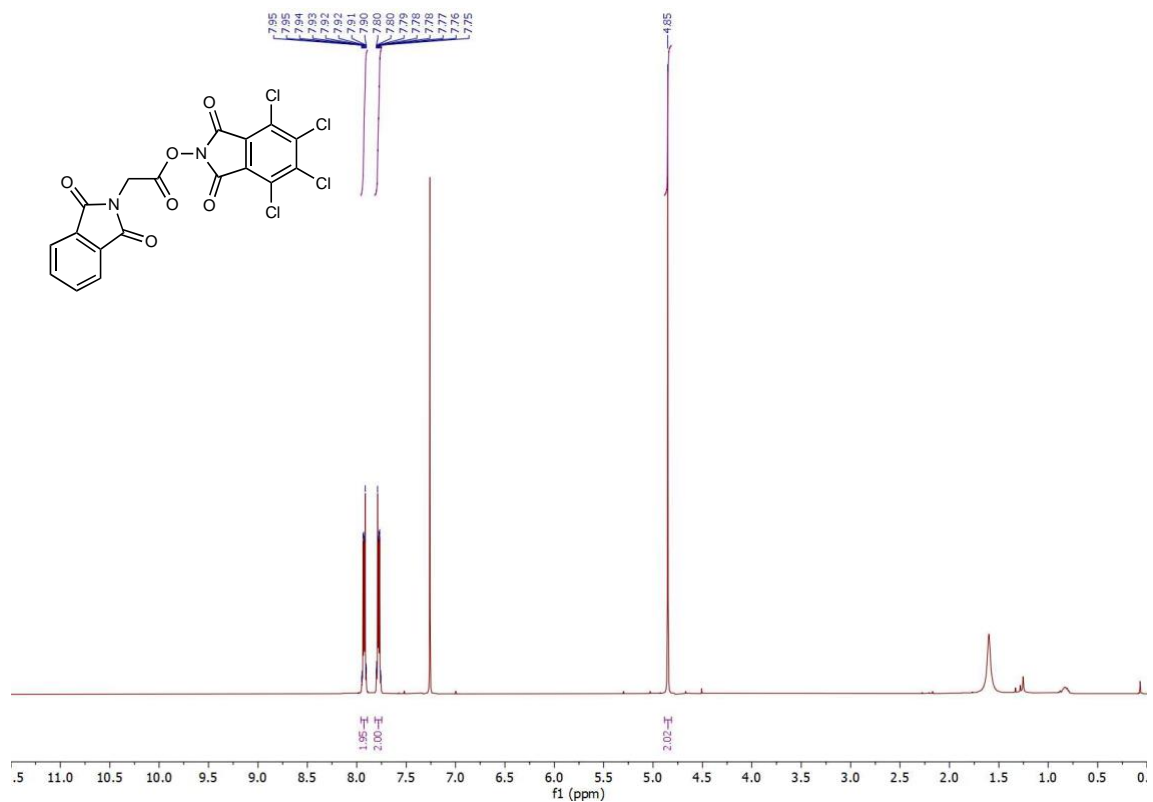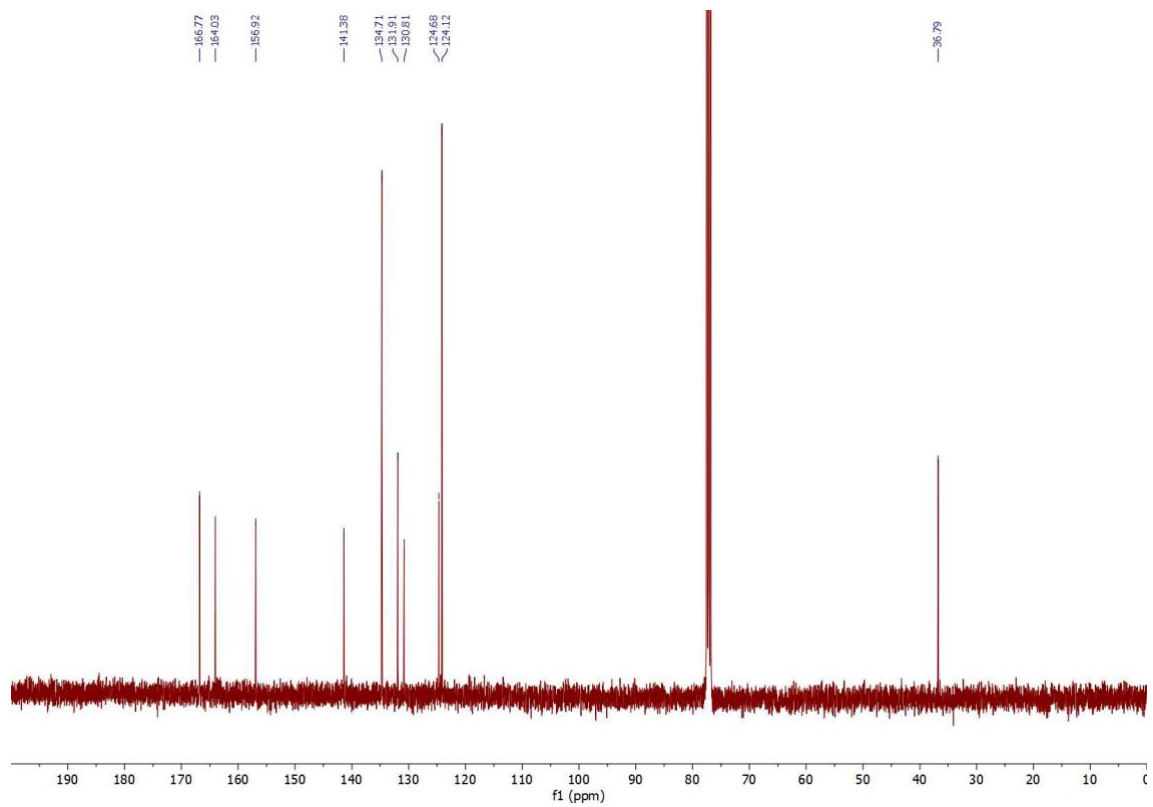

**N-benzyl-N-methyl-1-phenylpentan-3-amine (16a)**

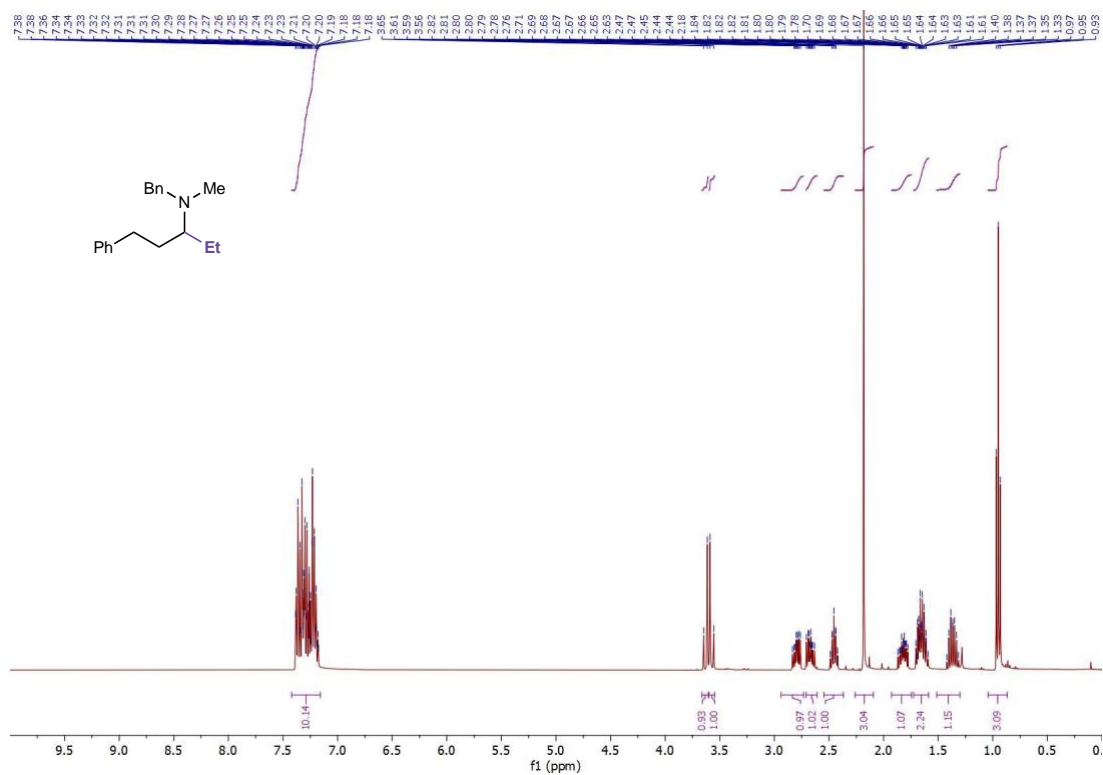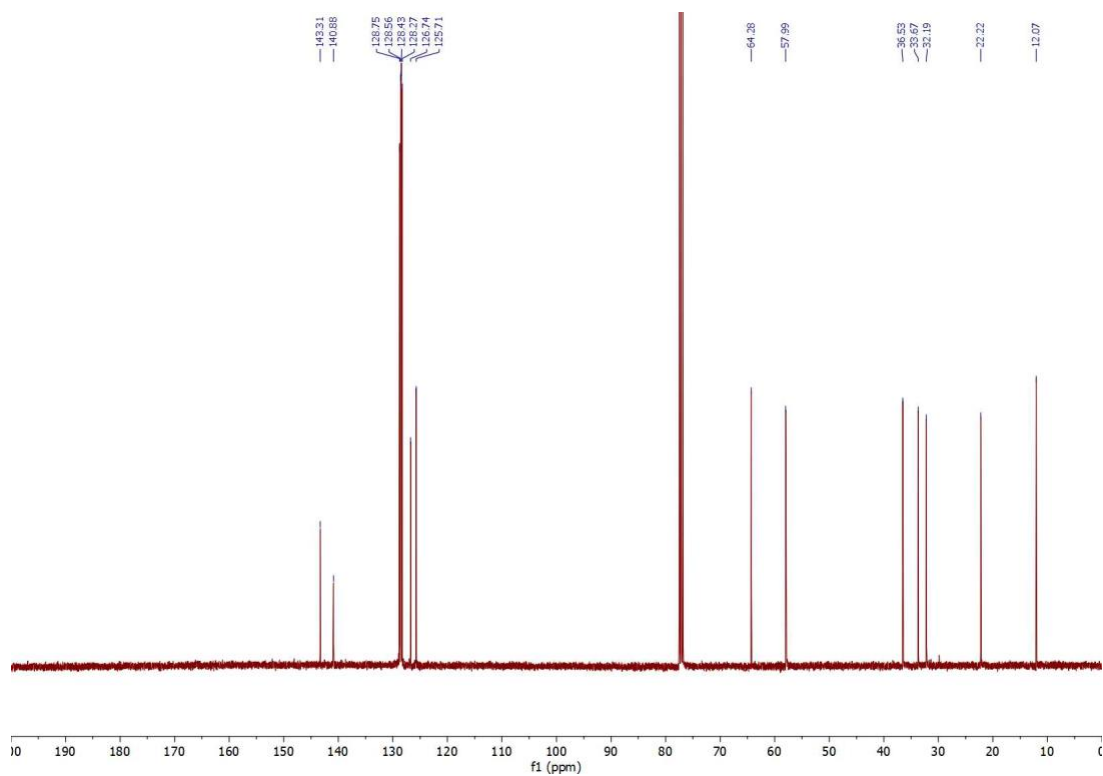



**N-benzyl-N-methyl-1-(1-methylcyclopropyl)-3-phenylpropan-1-amine amine (16b)**

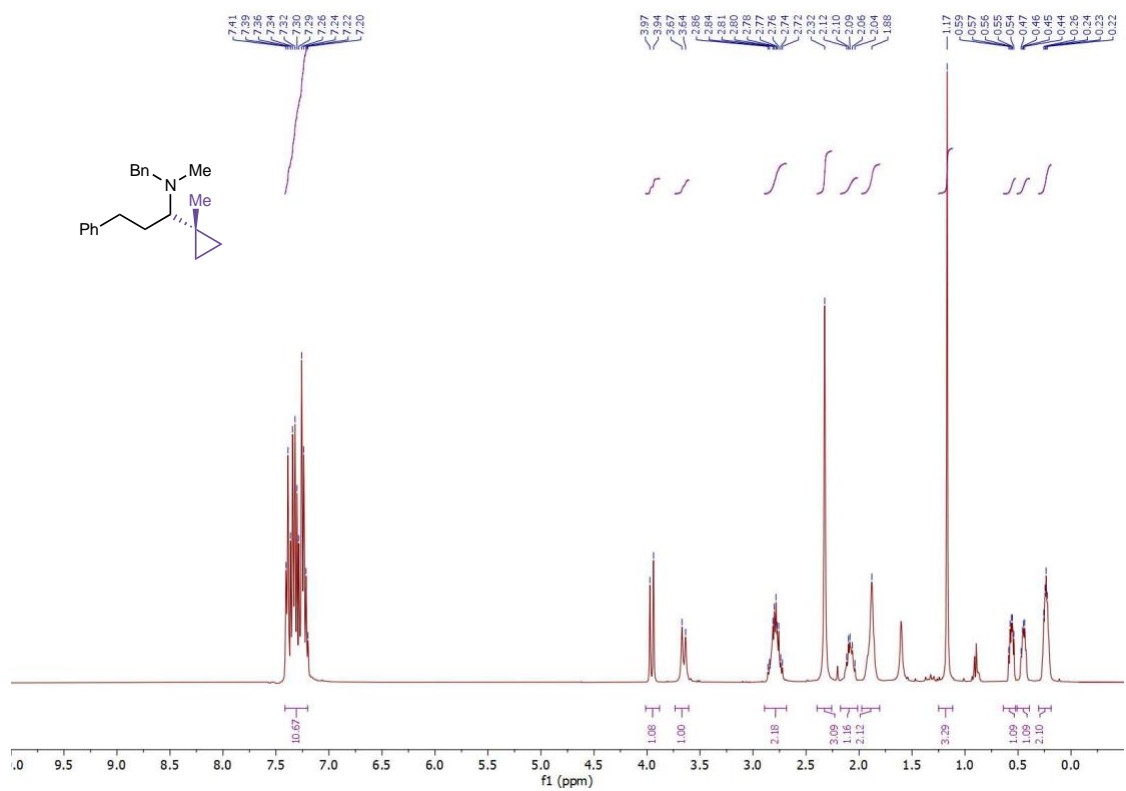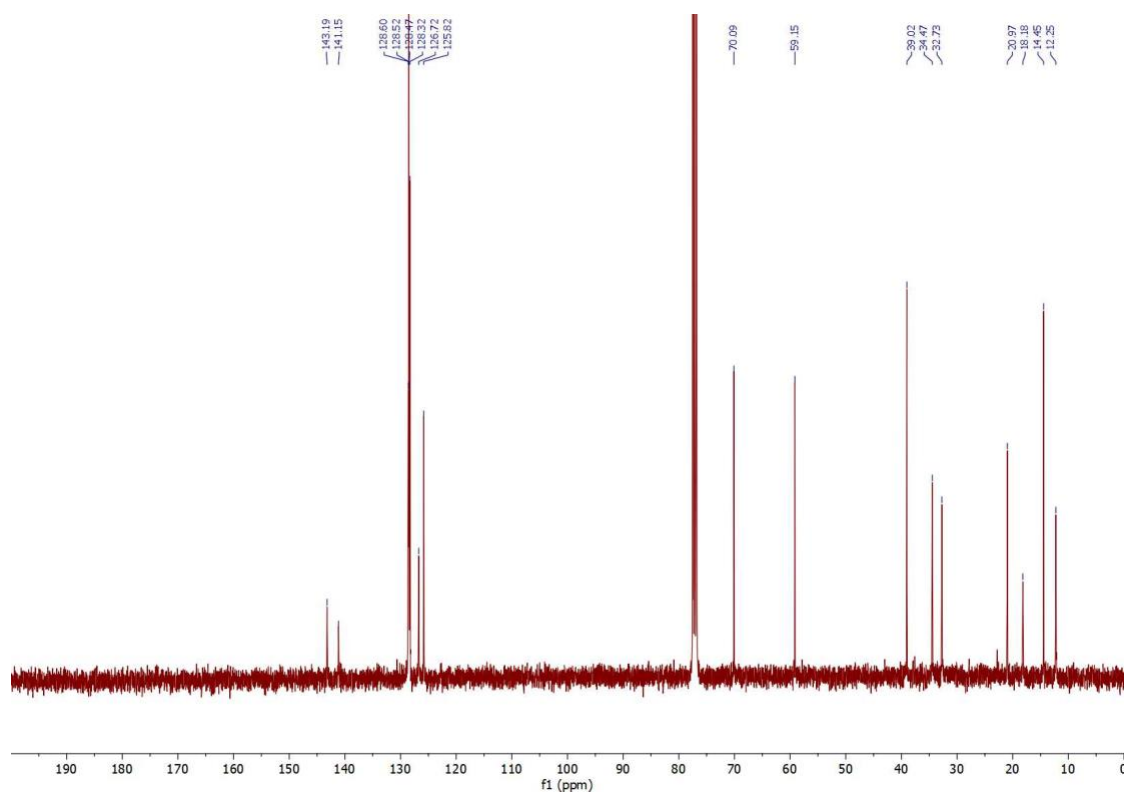

**N-benzyl-1-cyclobutyl-N-methyl-3-phenylpropan-1-amine (16c)**

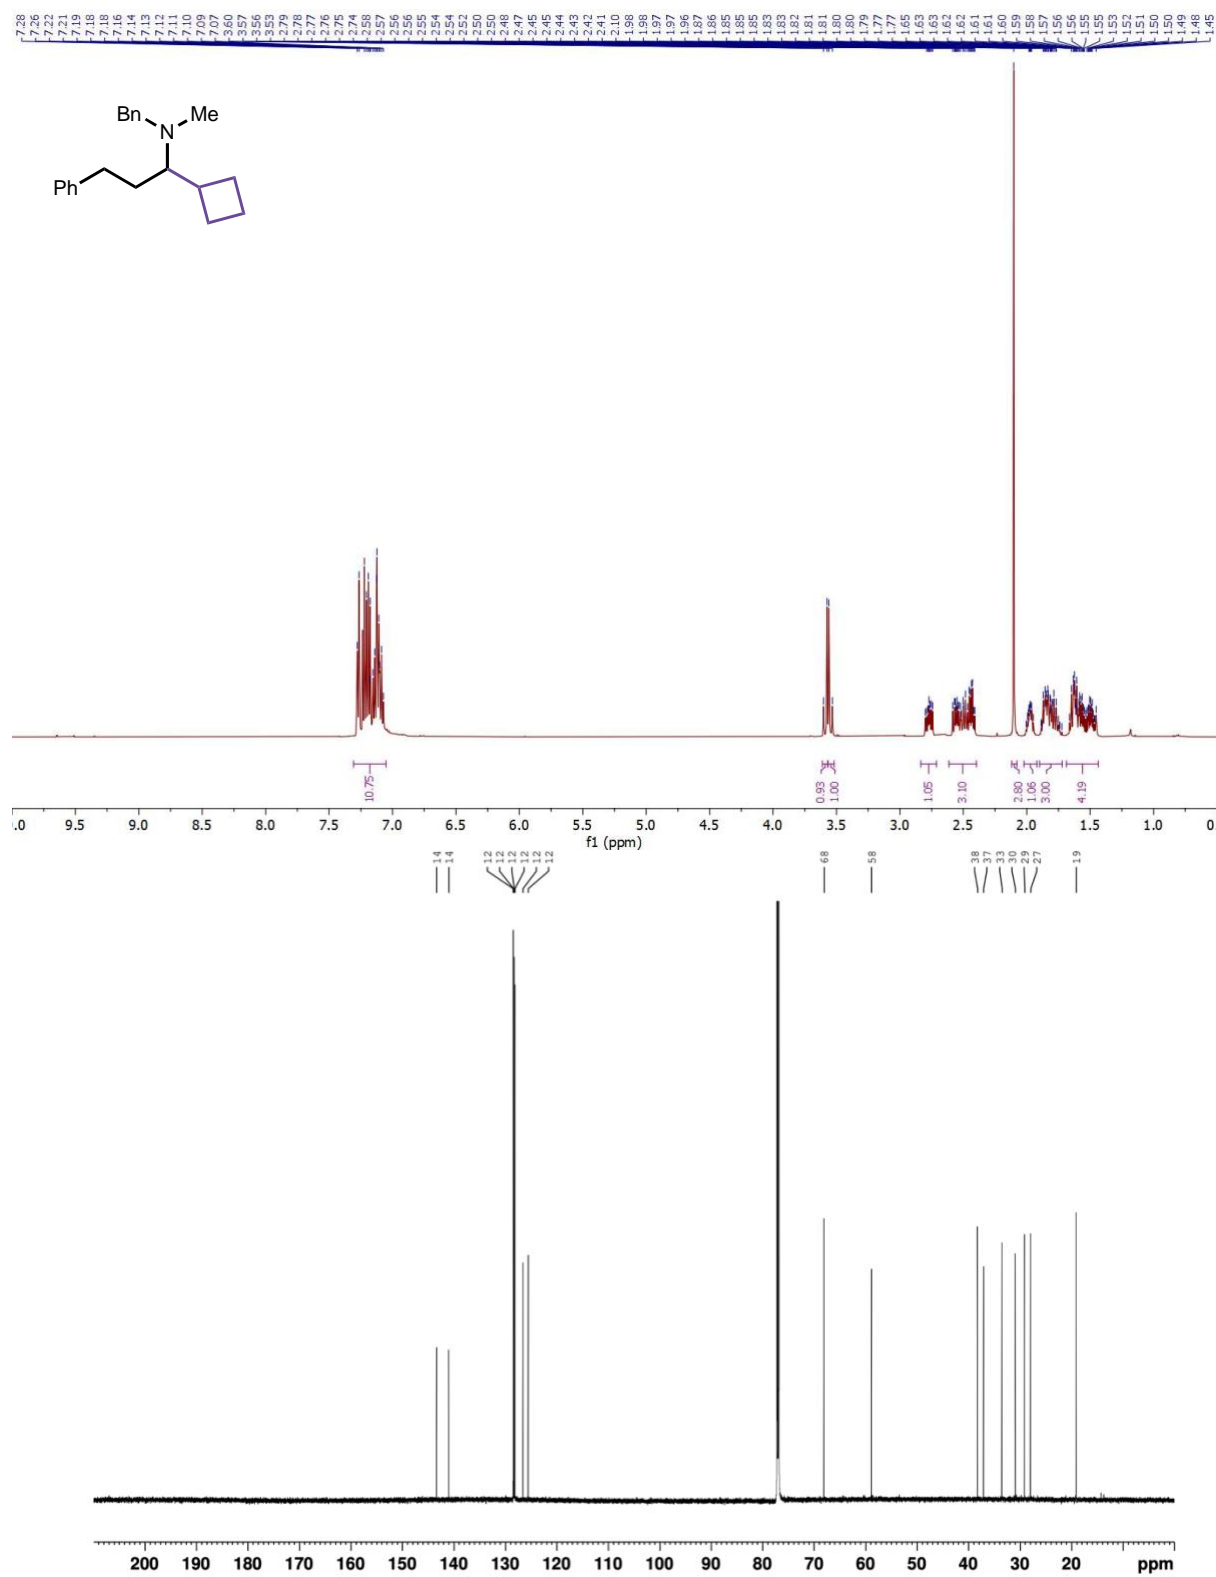

**N-benzyl-N-methyl-1-(3-methyloxetan-3-yl)-3-phenylpropan-1-amine (16d)**

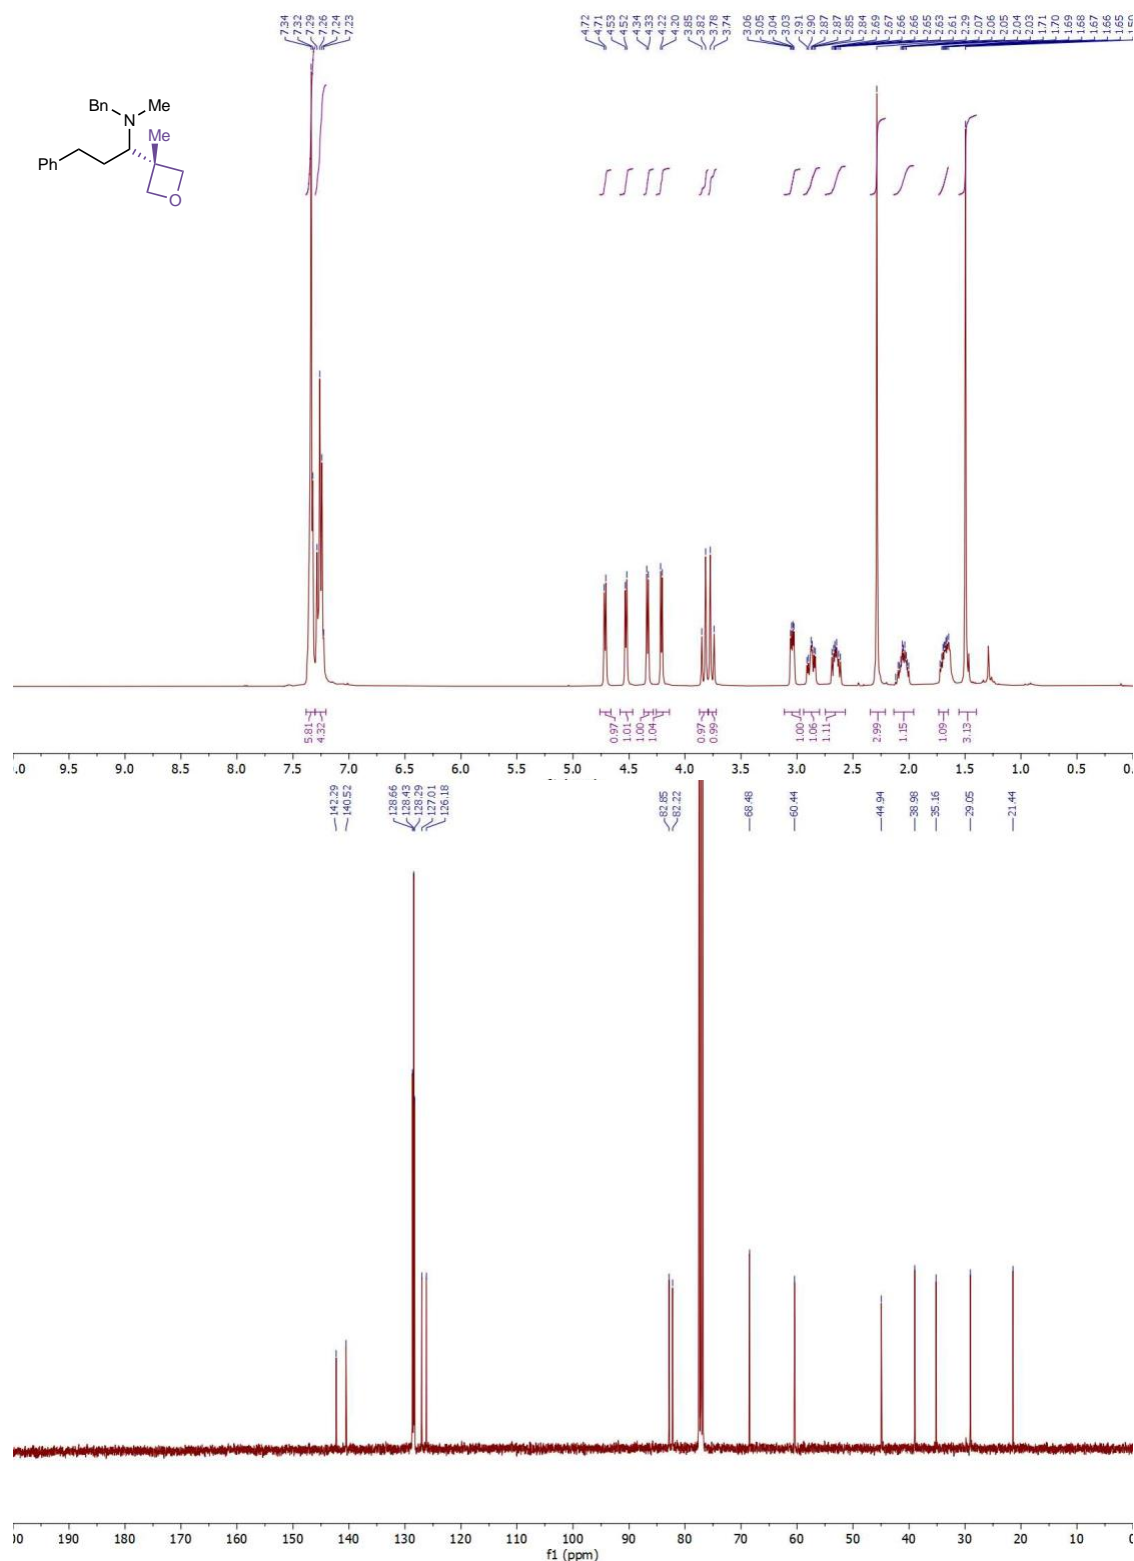

### 3-(1-(benzyl(methyl)amino)-3-phenylpropyl)cyclobutan-1-one (16e)

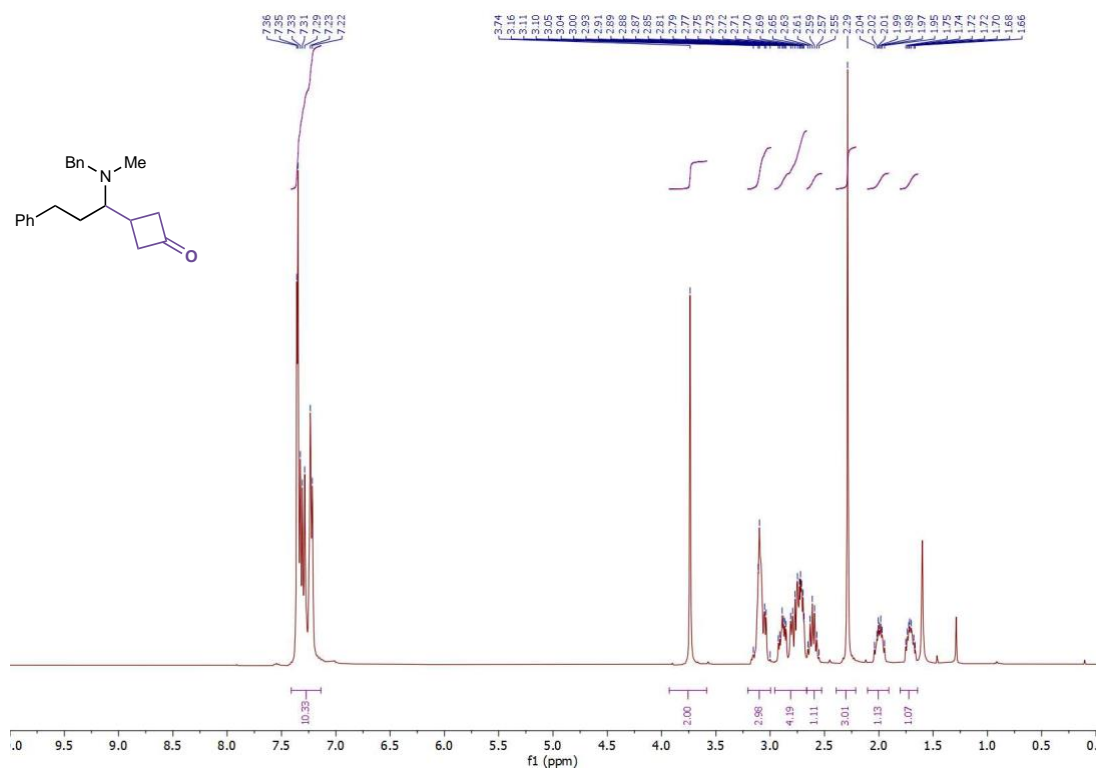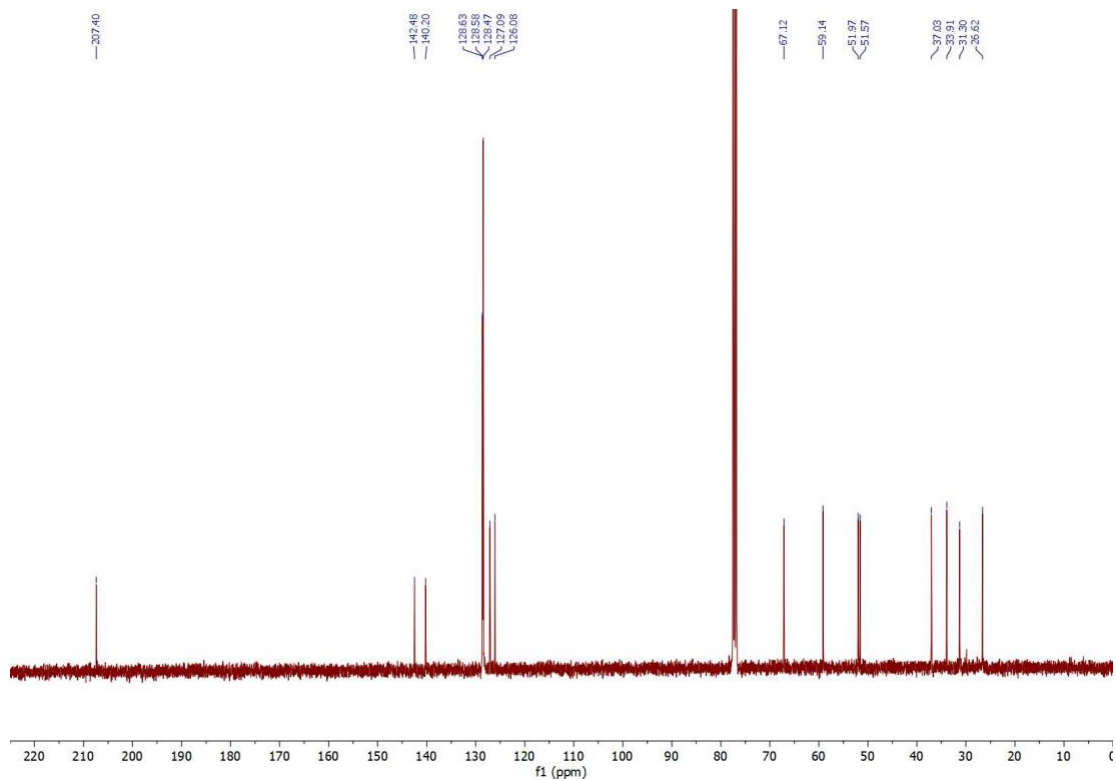

**N-benzyl-1-(3,3-difluorocyclobutyl)-N-methyl-3-phenylpropan-1-amine (16f)**

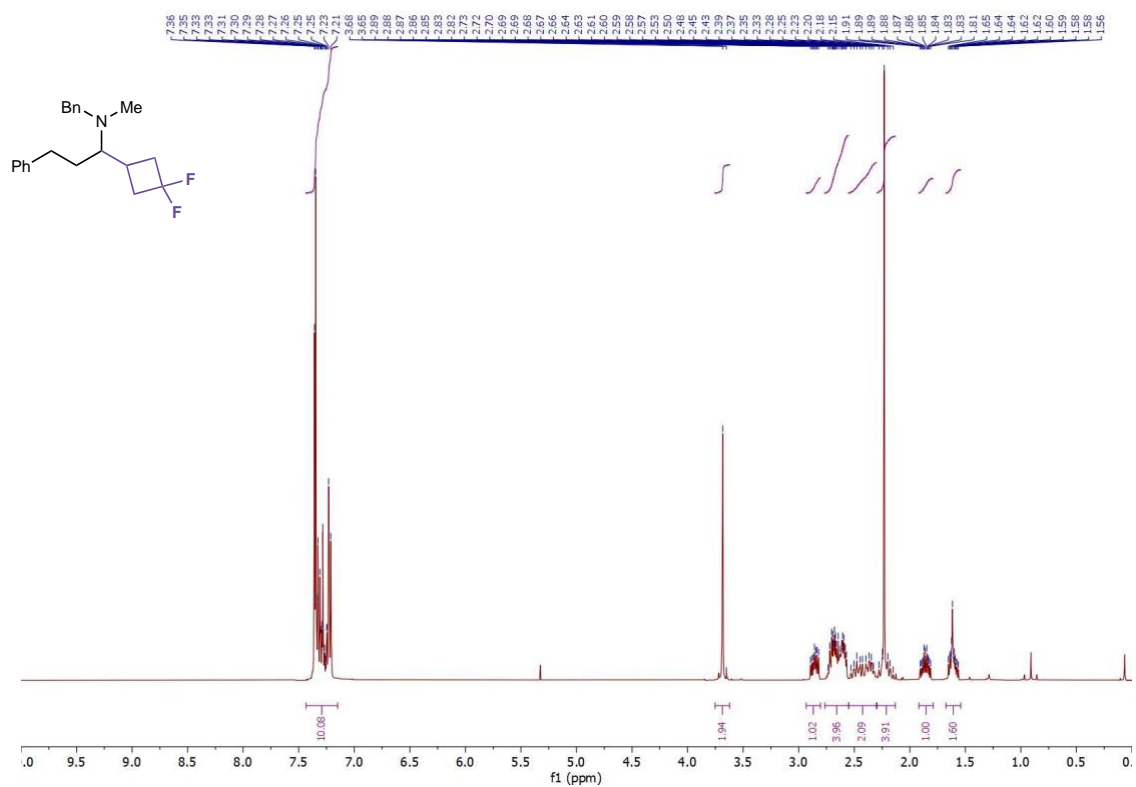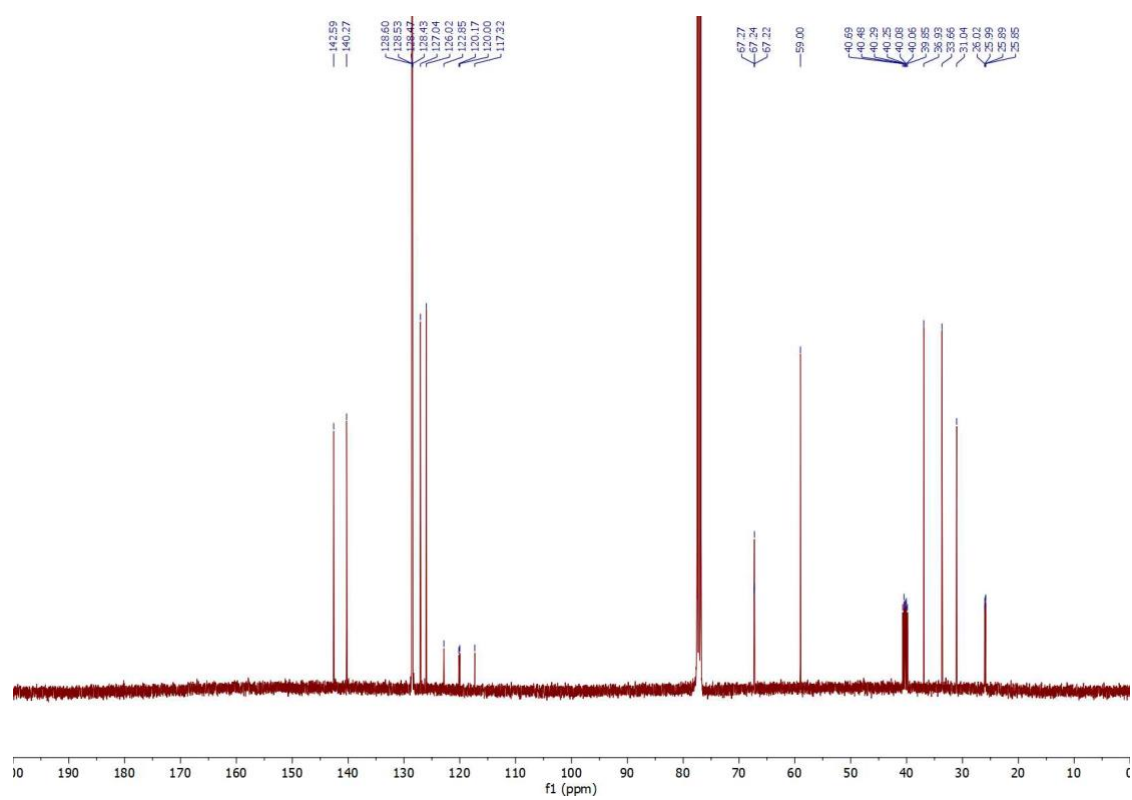

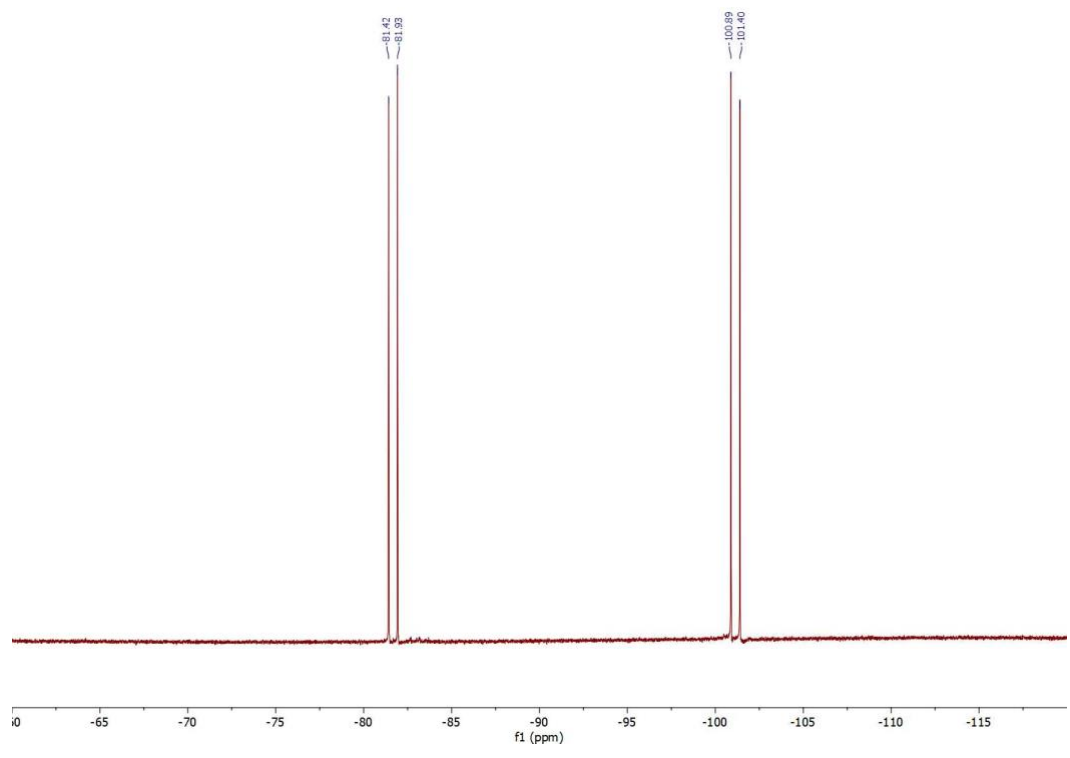



**N-benzyl-1-cycloheptyl-N-methyl-3-phenylpropan-1-amine (16h)**

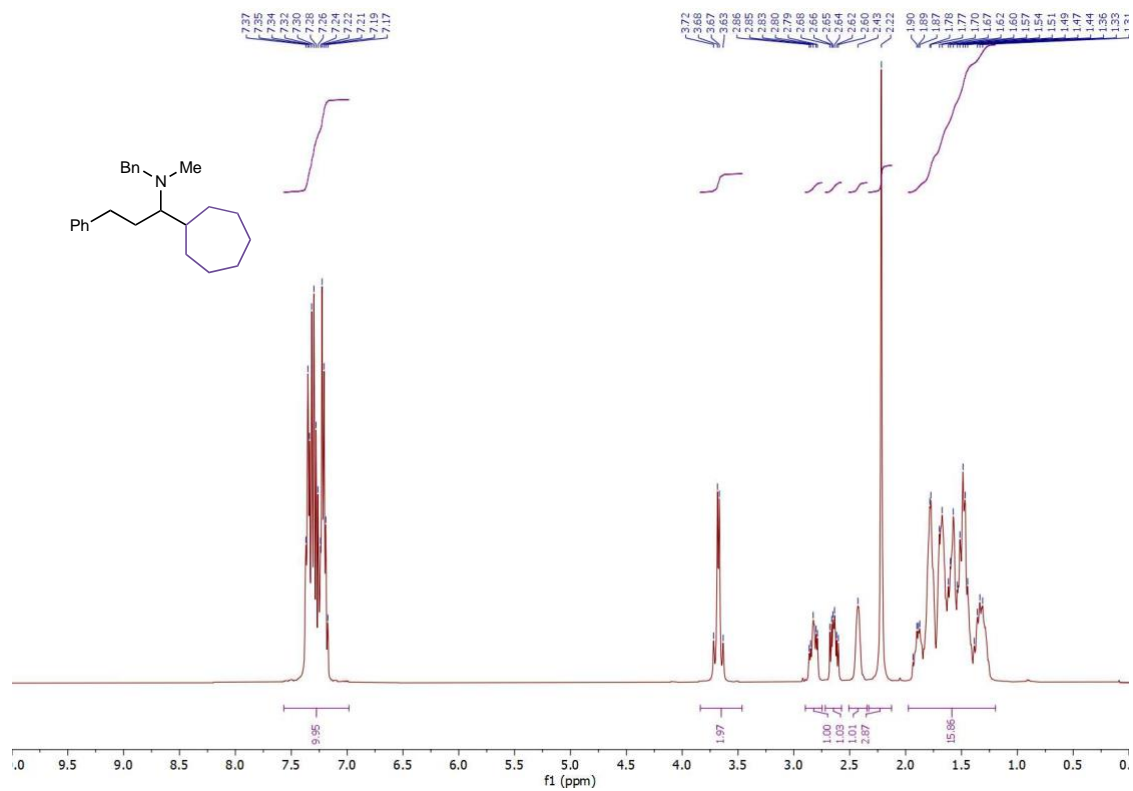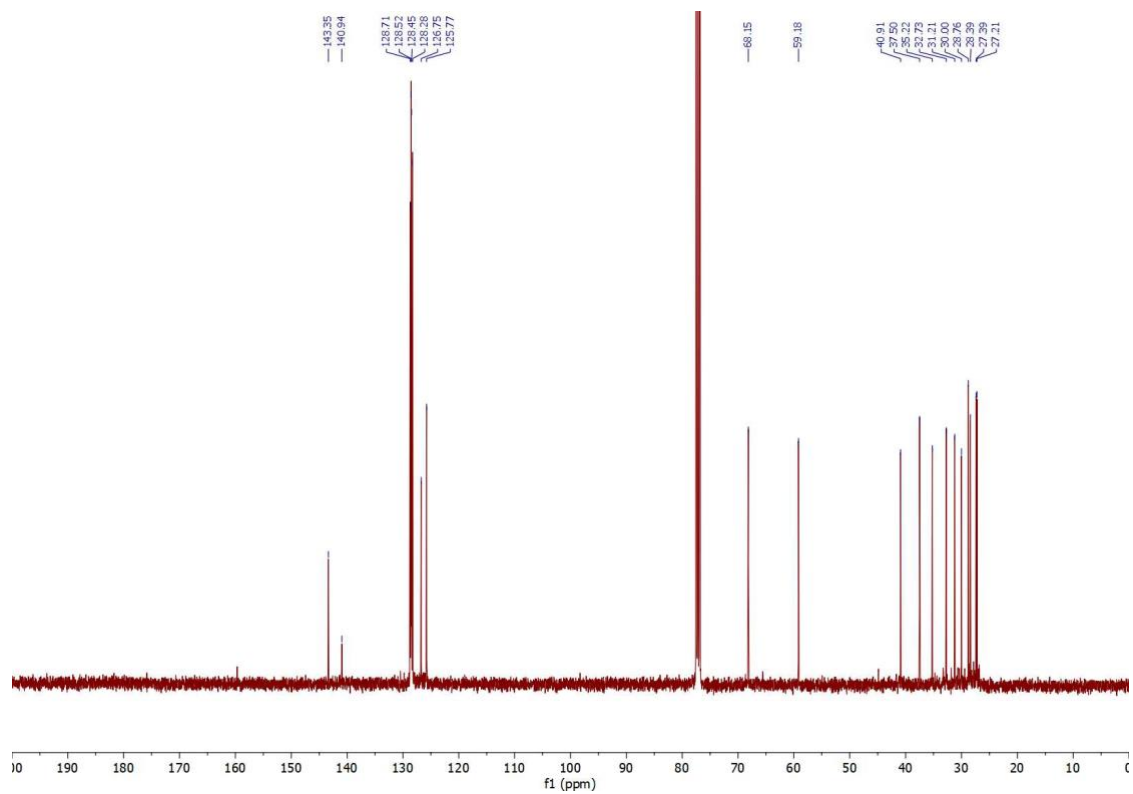



**N-benzyl-1-methoxy-N-methyl-5-phenylpentan-3-amine (16i)**

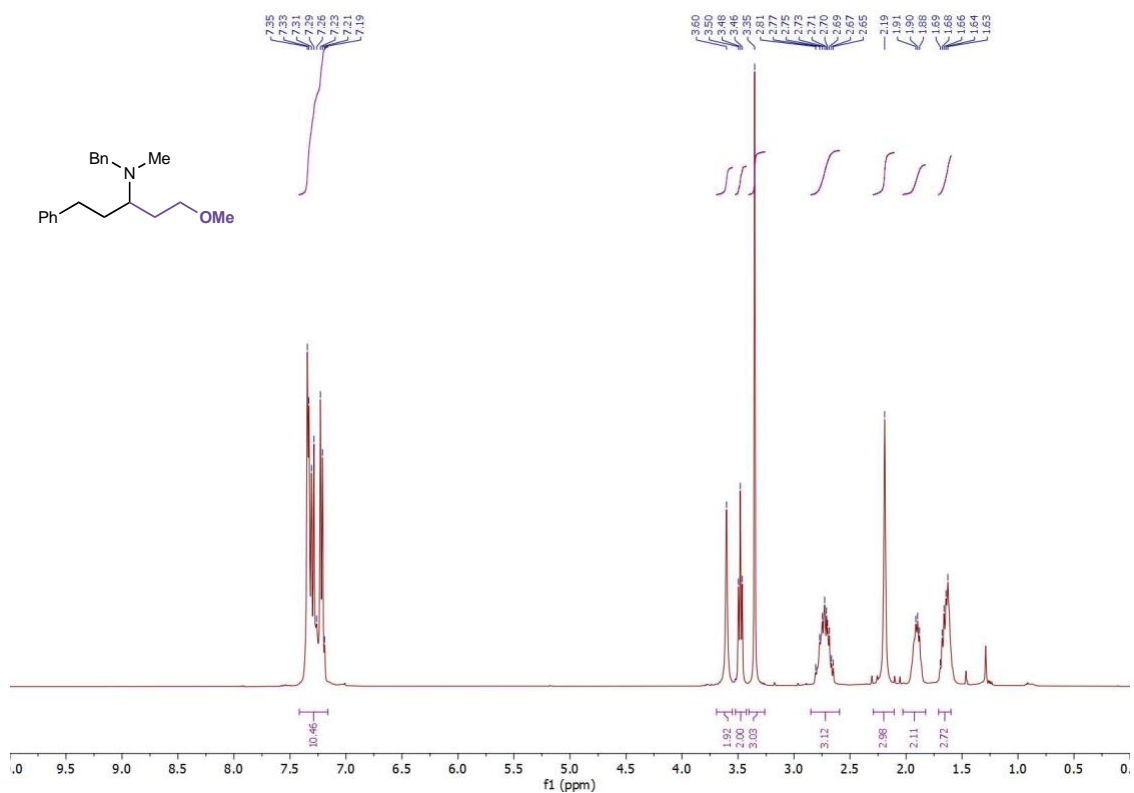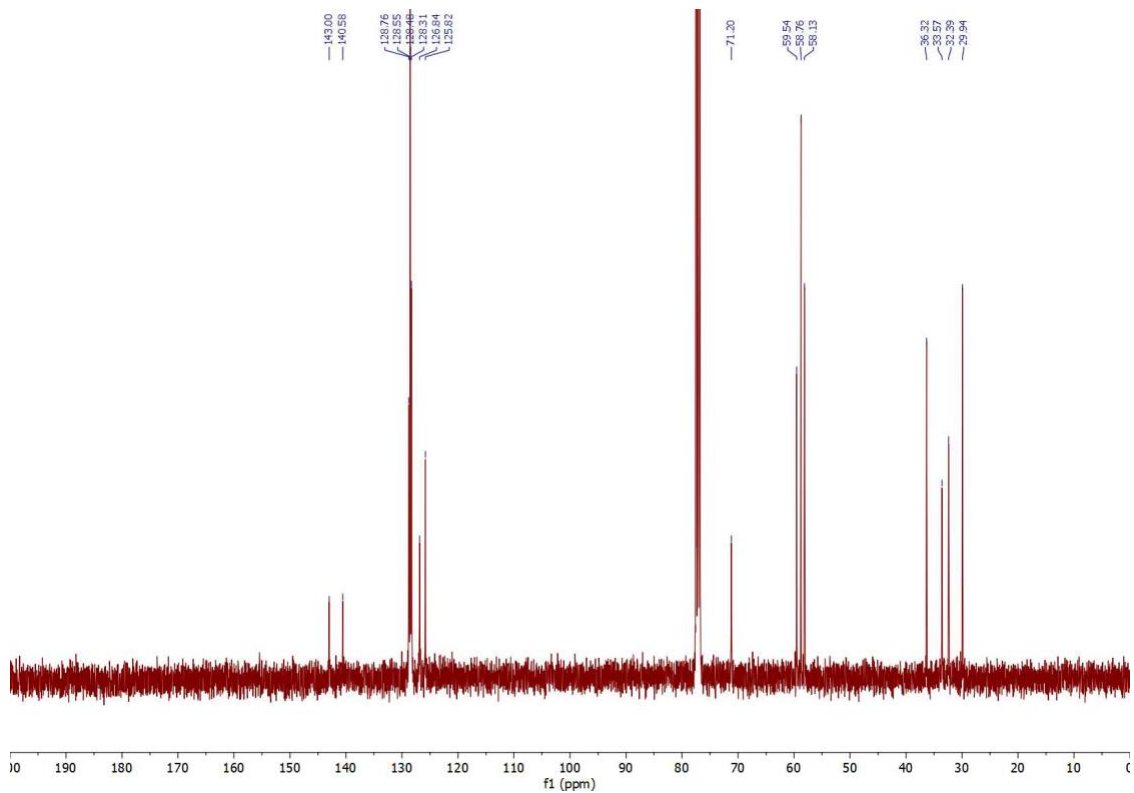

# N-benzyl-1-(benzyloxy)-N-methylbutan-2-amine (16j)

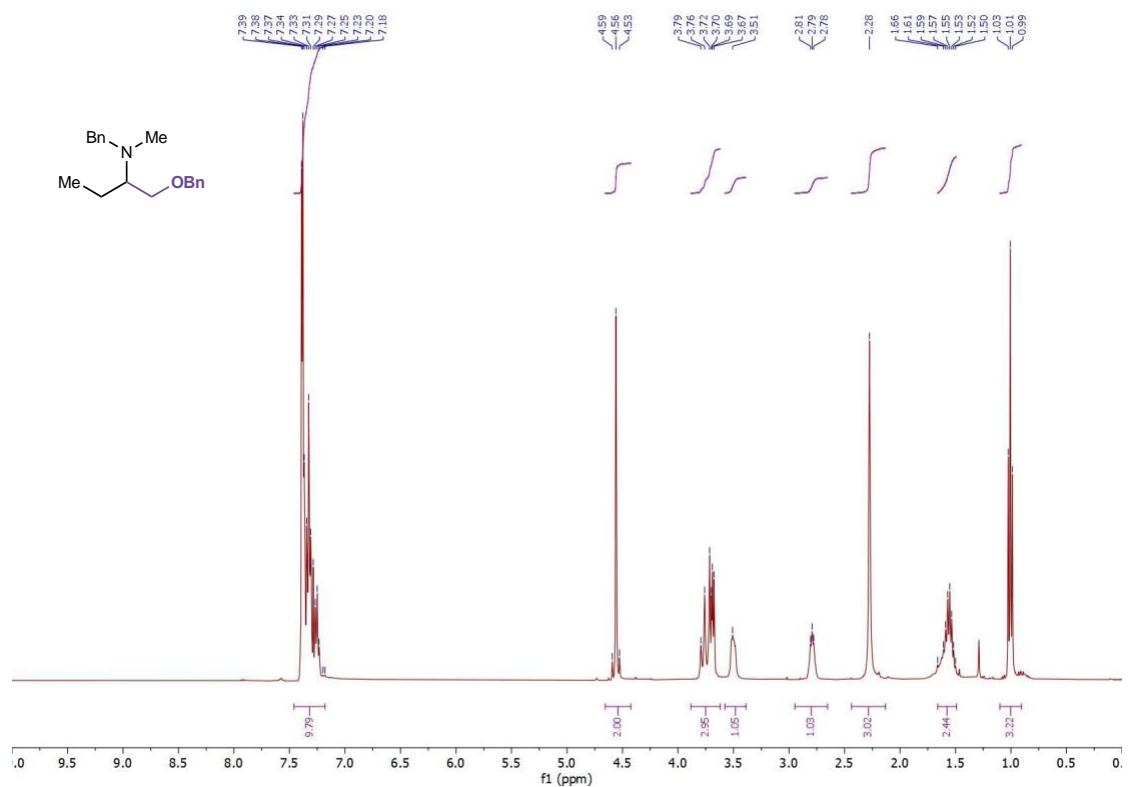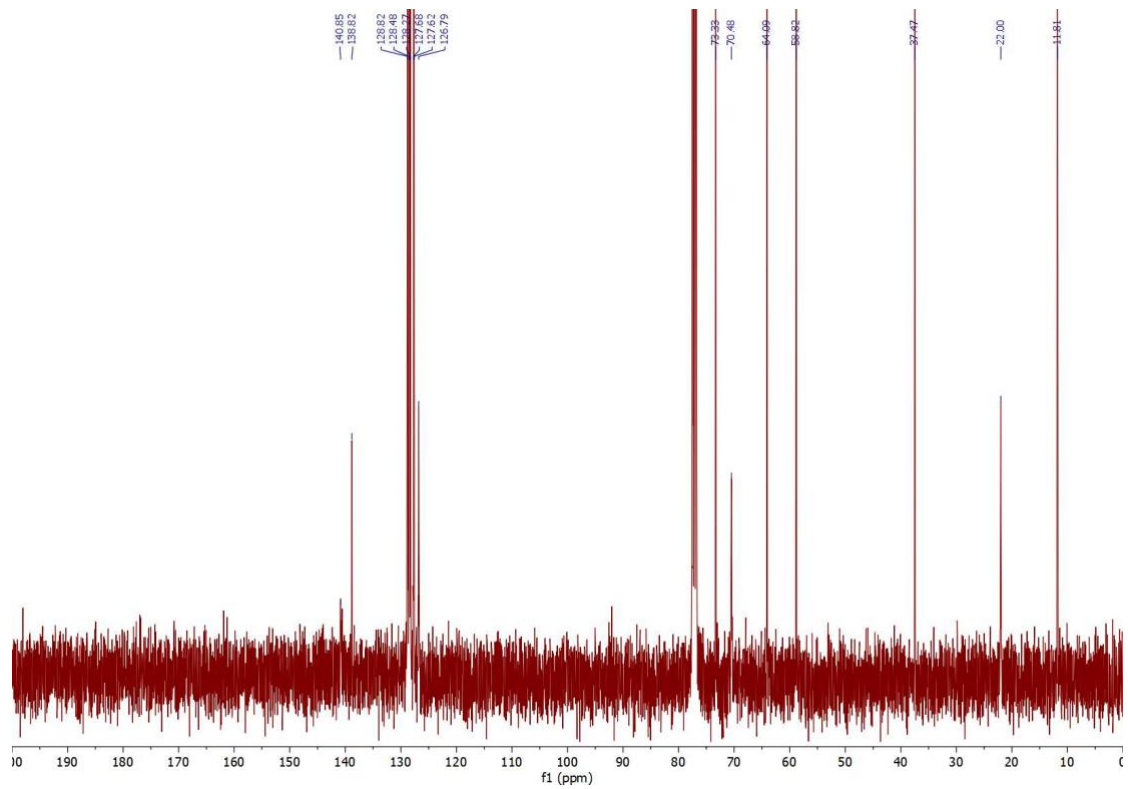

2-(2-(benzyl(methyl)amino)-4-phenylbutyl)isoindoline-1,3-dione (16k)

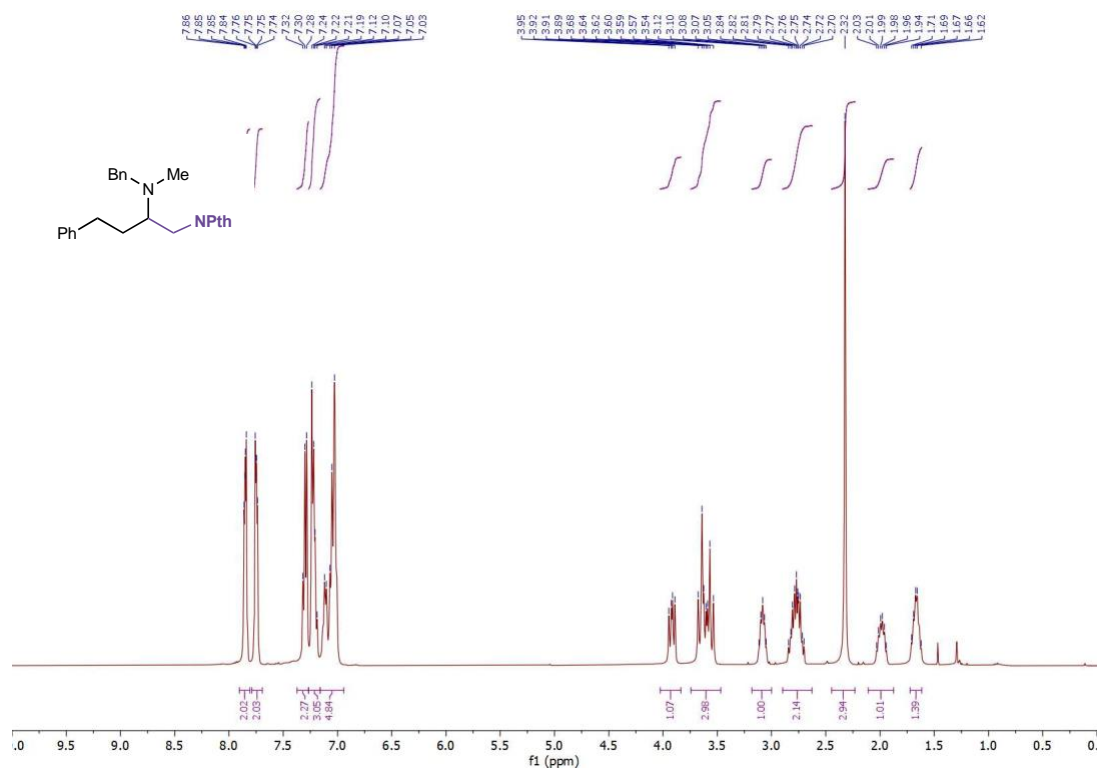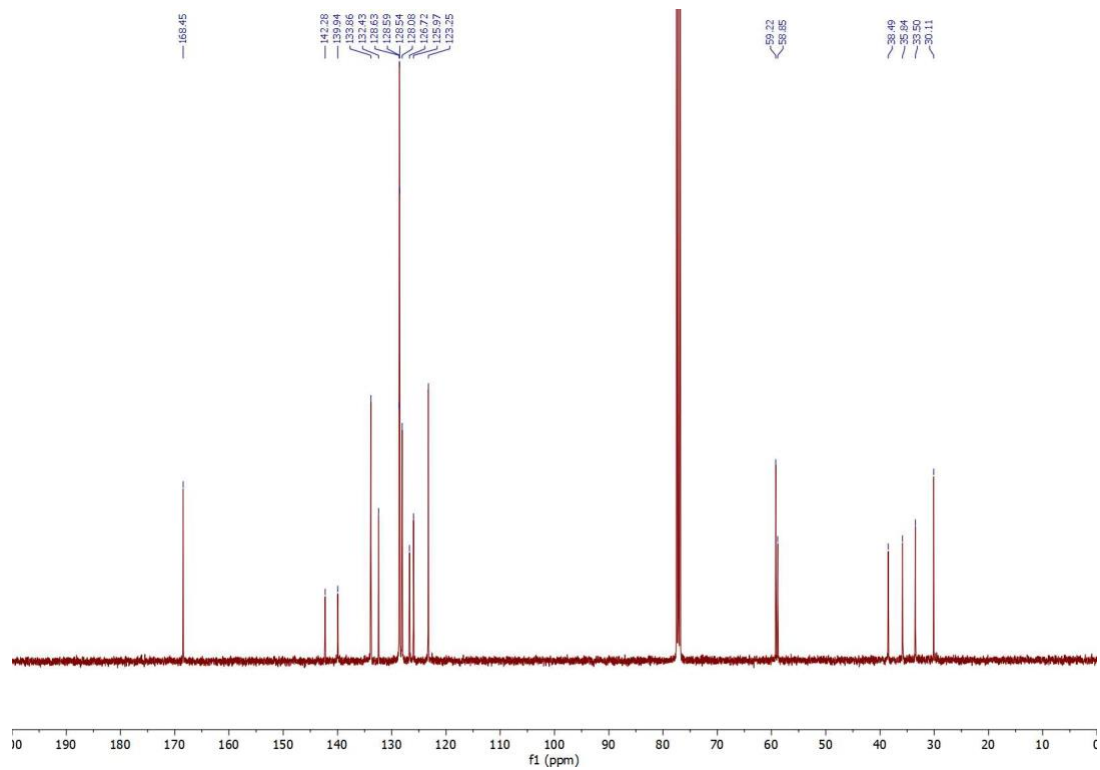



**N-benzyl-N-methyl-3-phenyl-1-(tetrahydrofuran-2-yl)propan-1-amine (16m) single diastereomer**

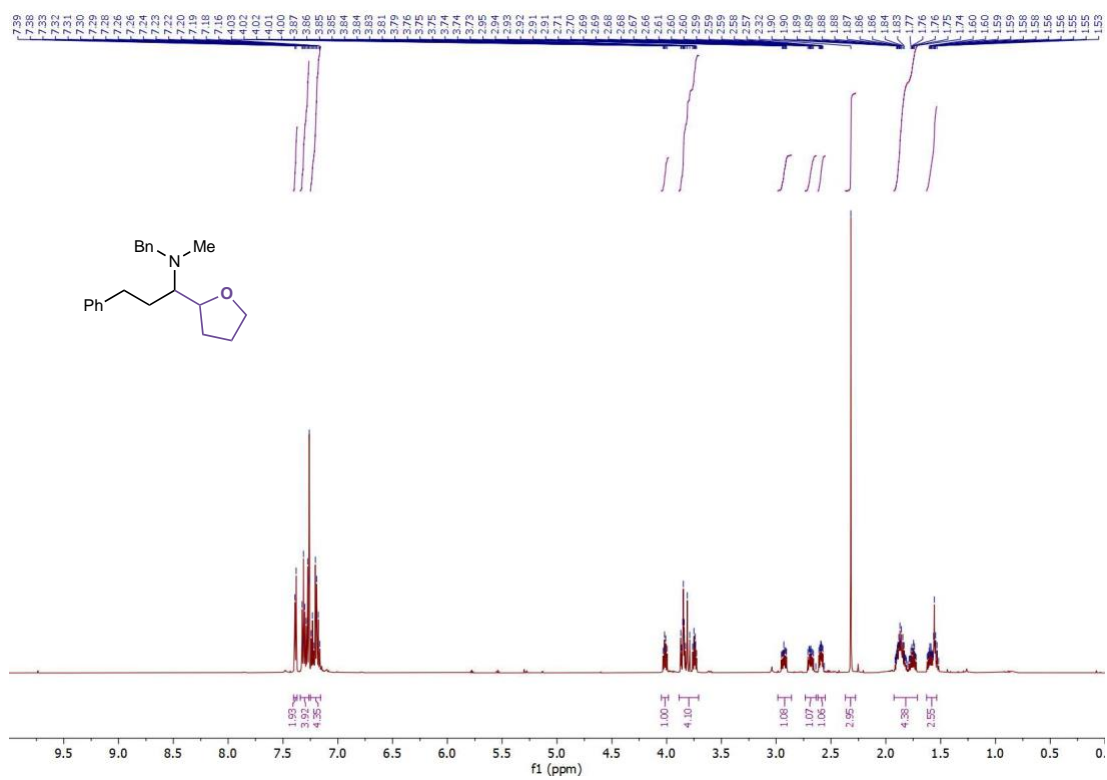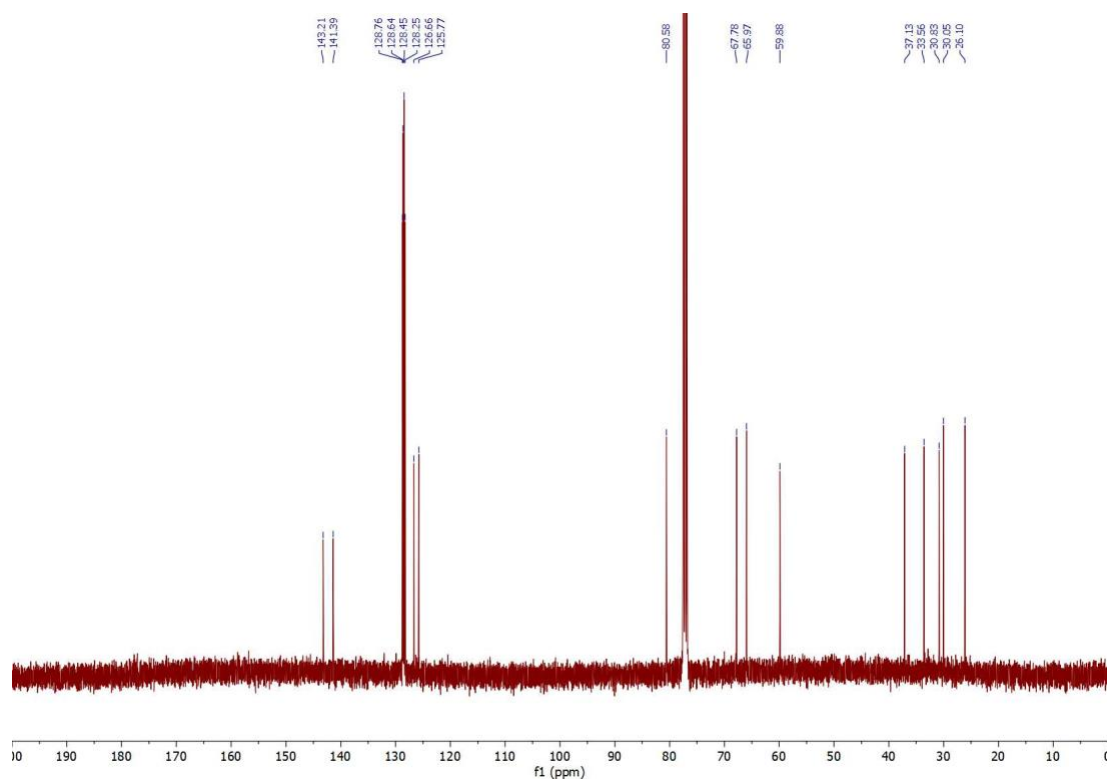

**N-benzyl-4-fluoro-N,4-dimethyl-1-phenylpentan-3-amine (16n)**

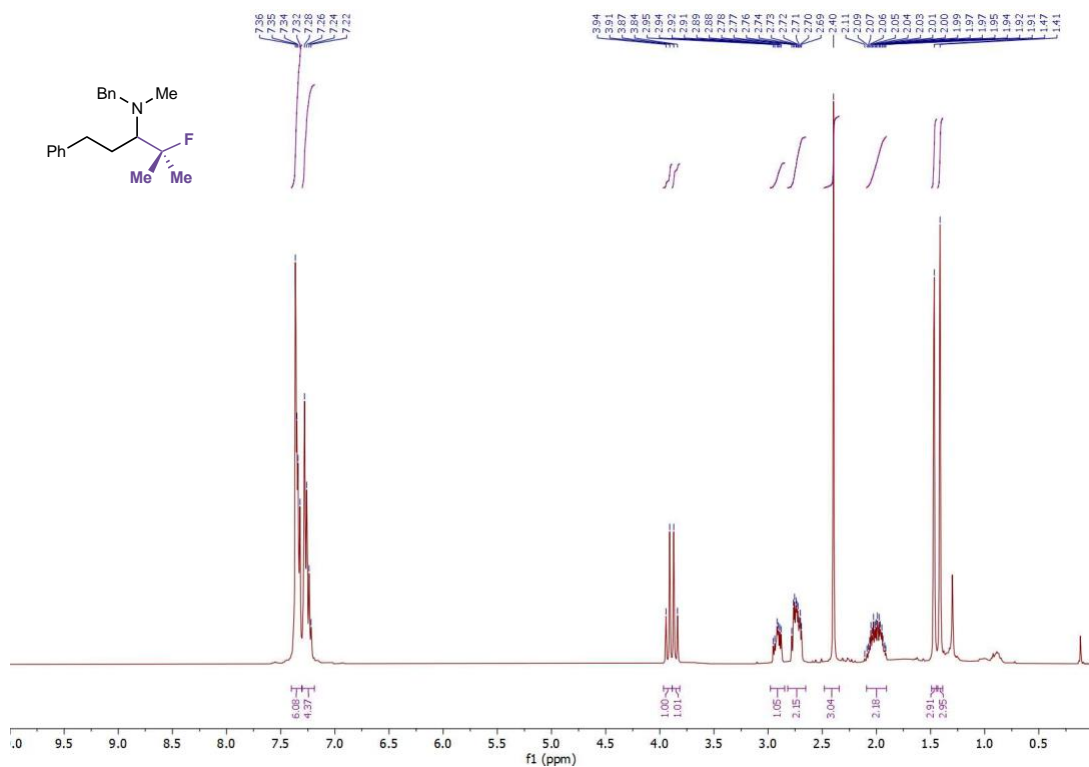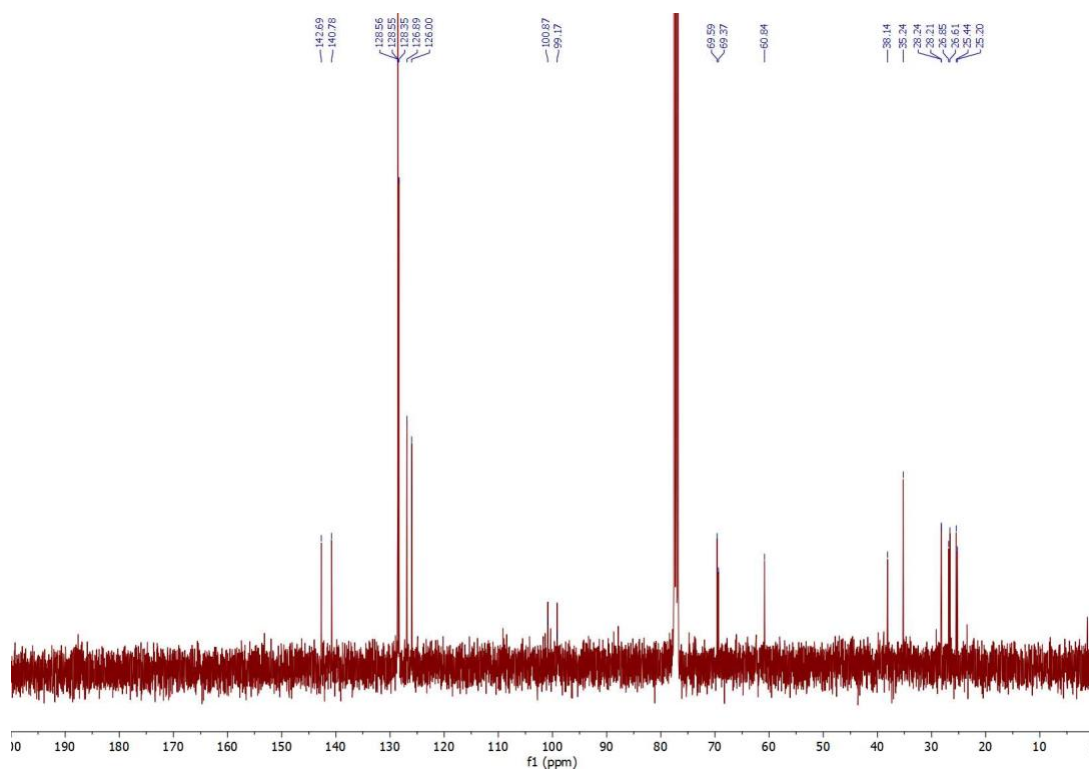

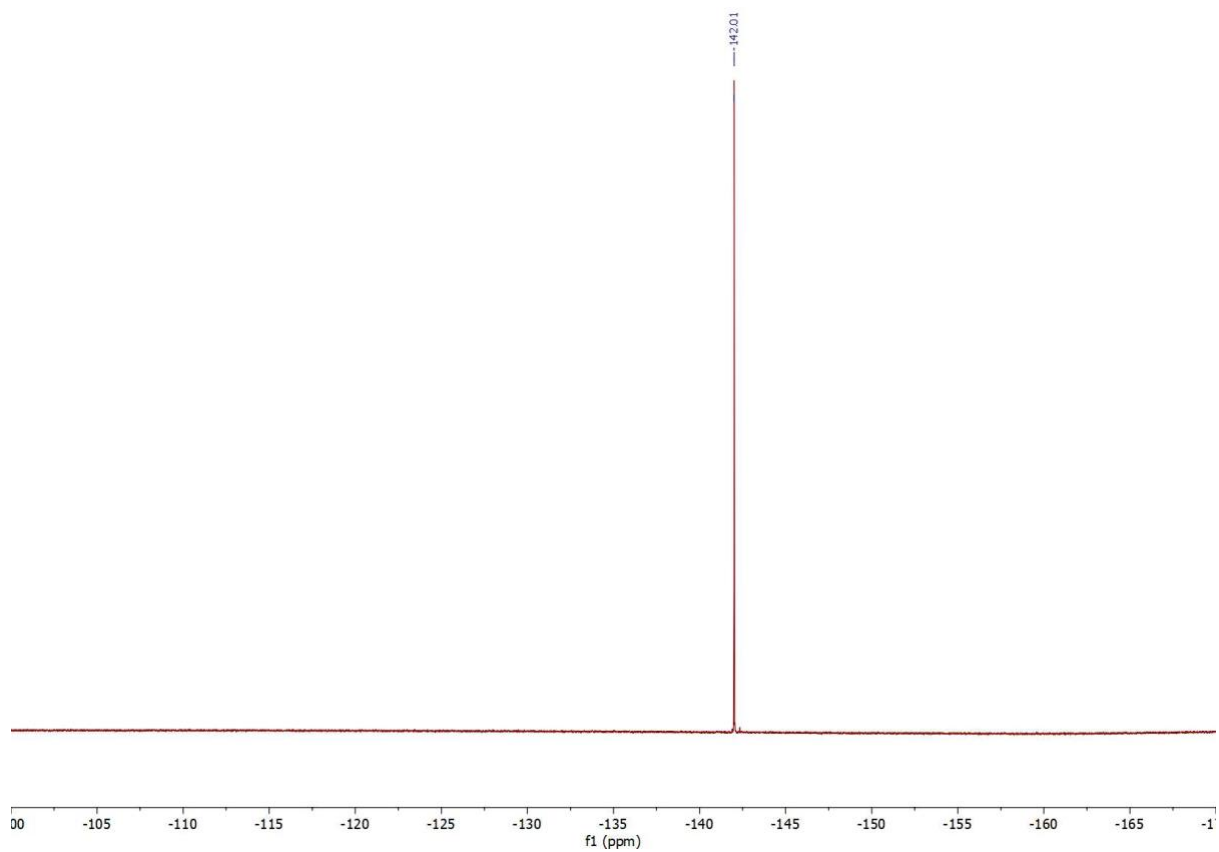

# N-(2,3-dimethylbutan-2-yl)-4-methoxyaniline (17a)

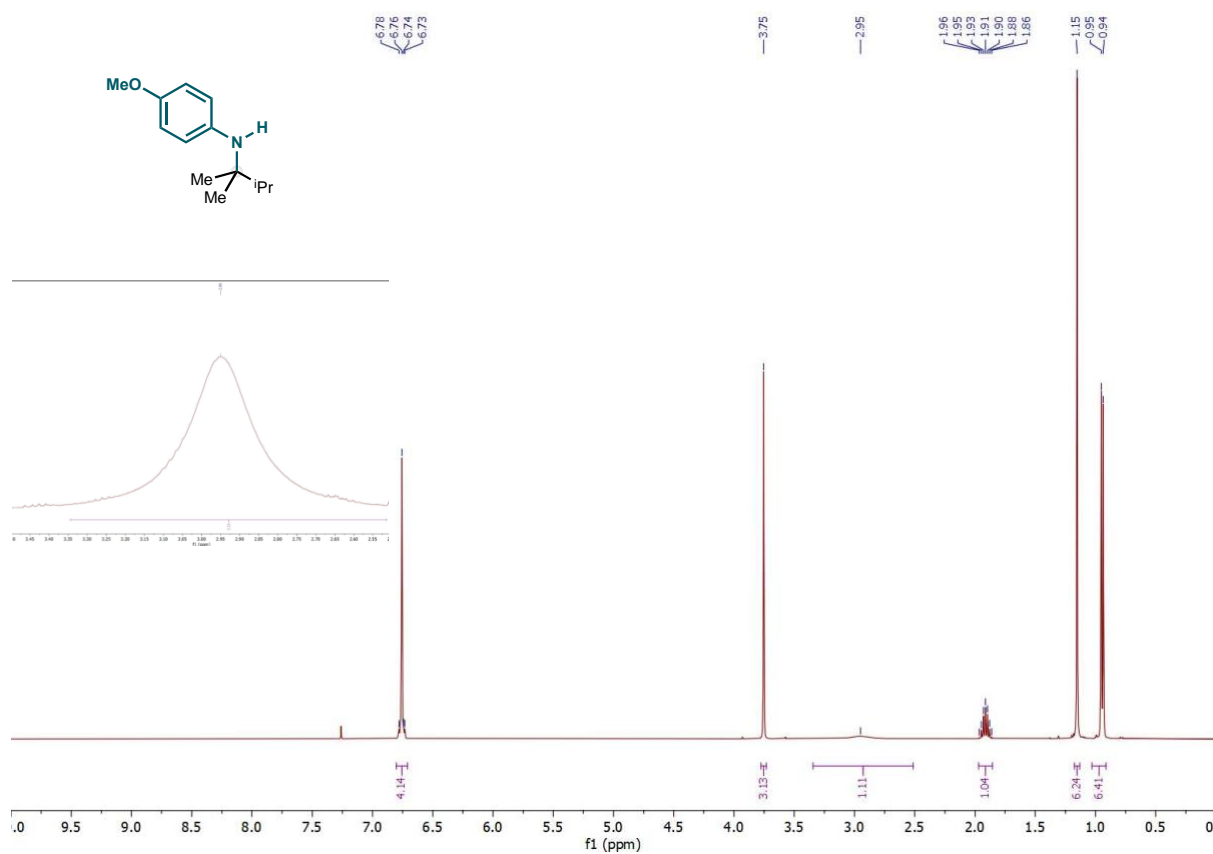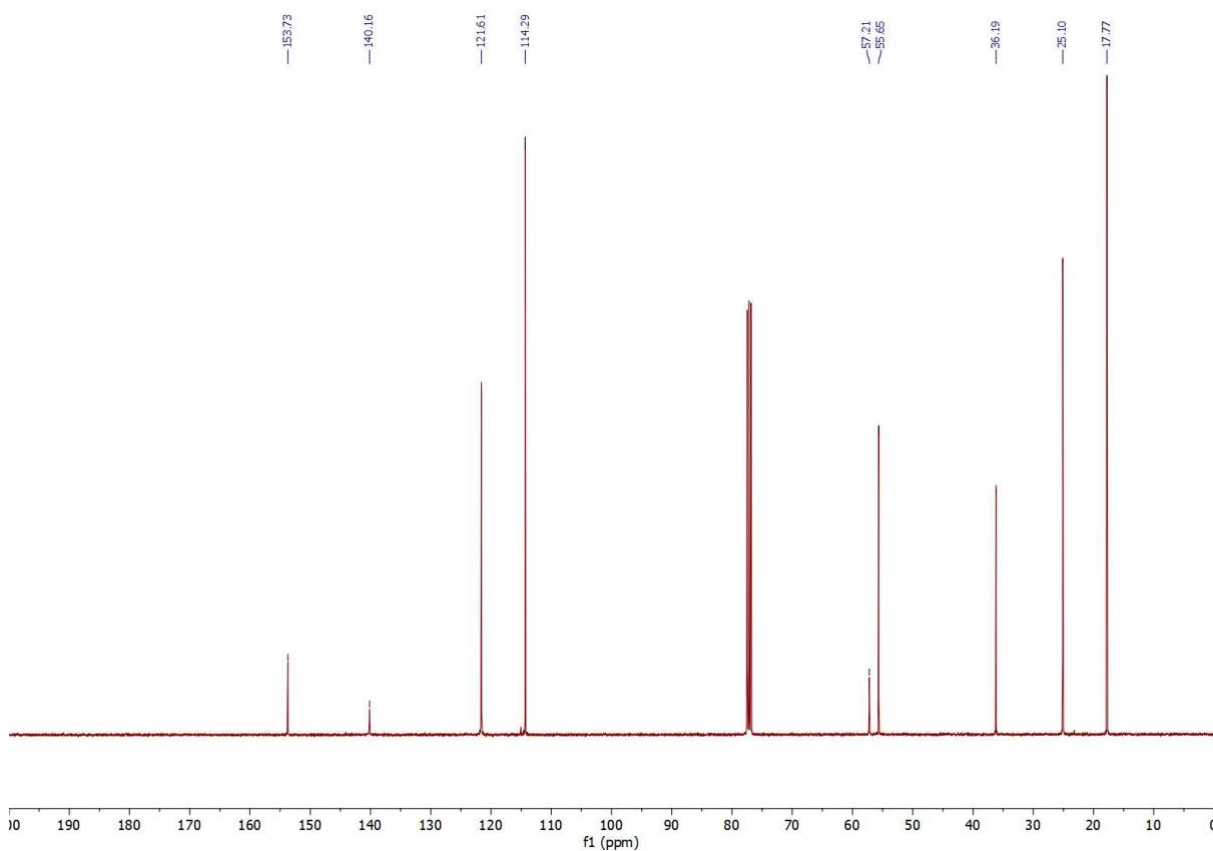



# N-(2,3-dimethylbutan-2-yl)aniline (17b)

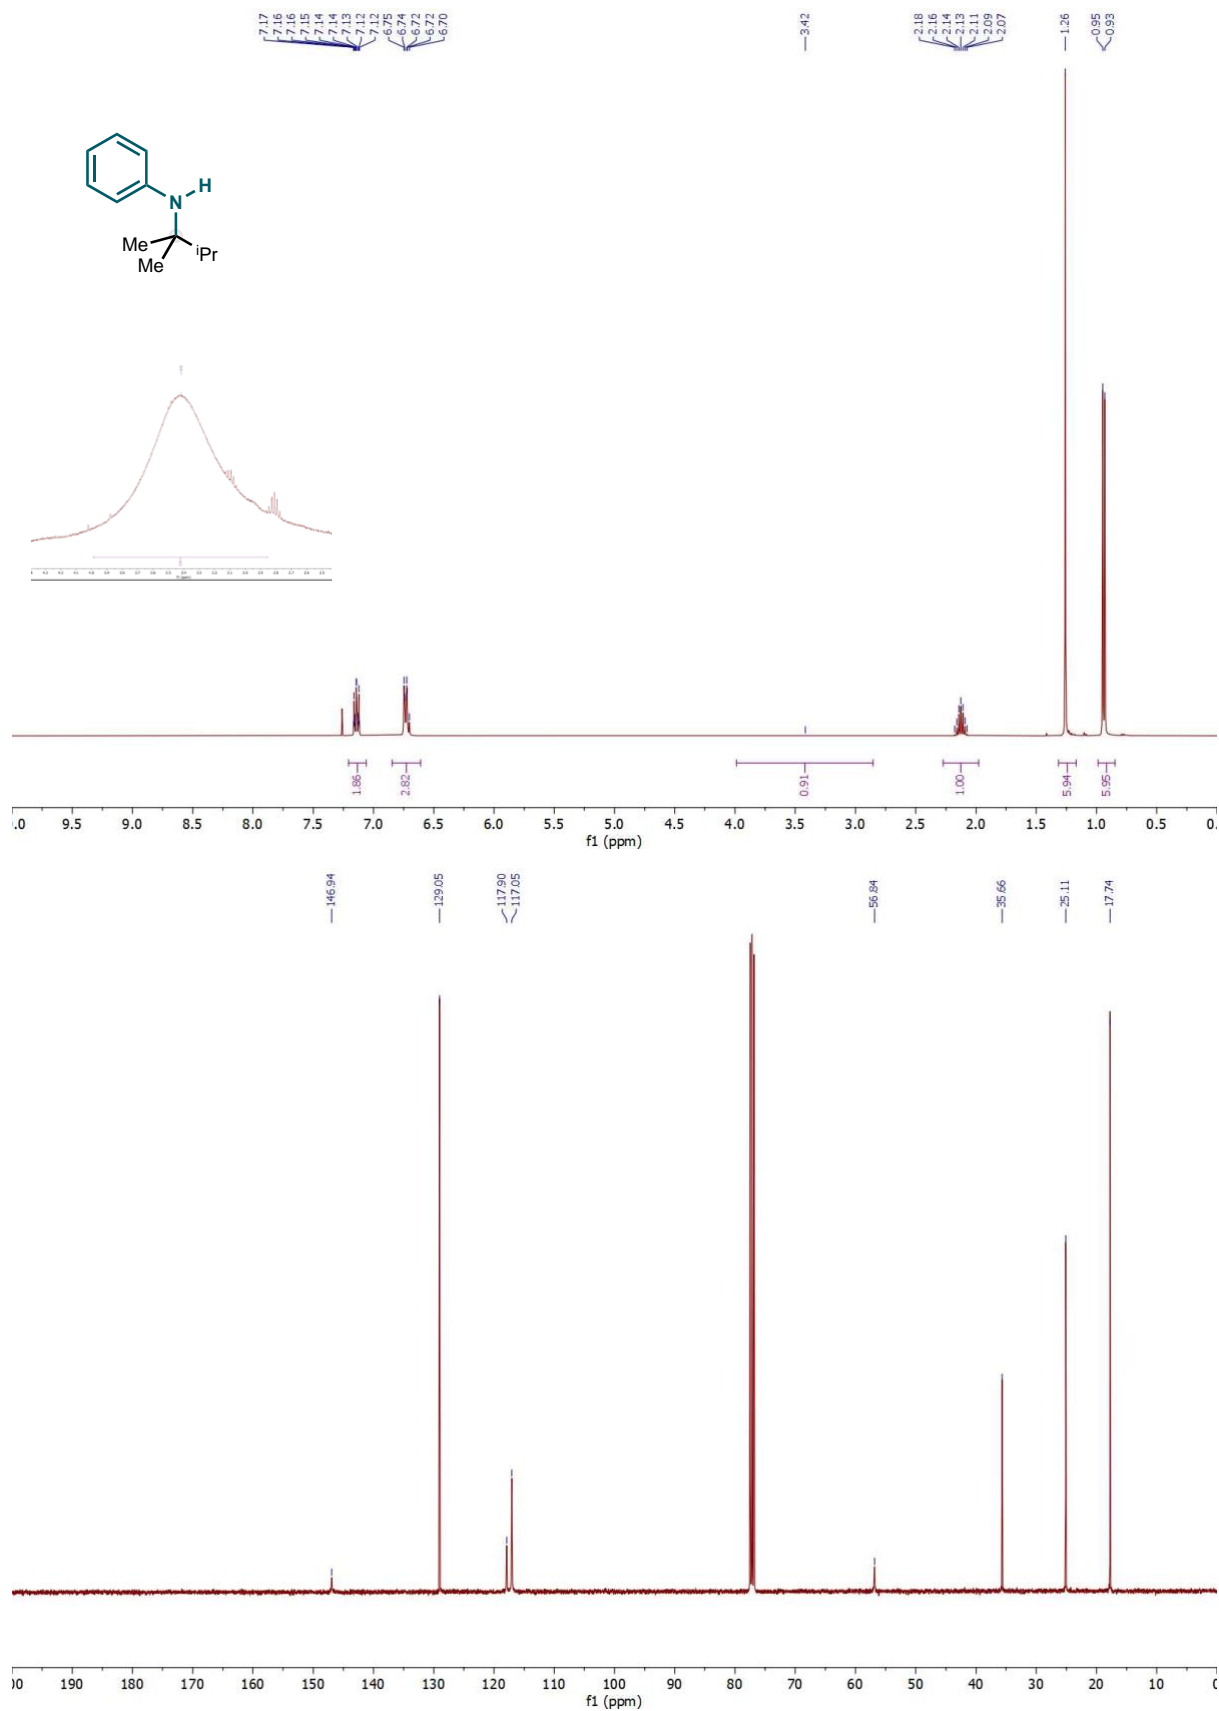

# 4-bromo-N-(2,3-dimethylbutan-2-yl)aniline (17c)

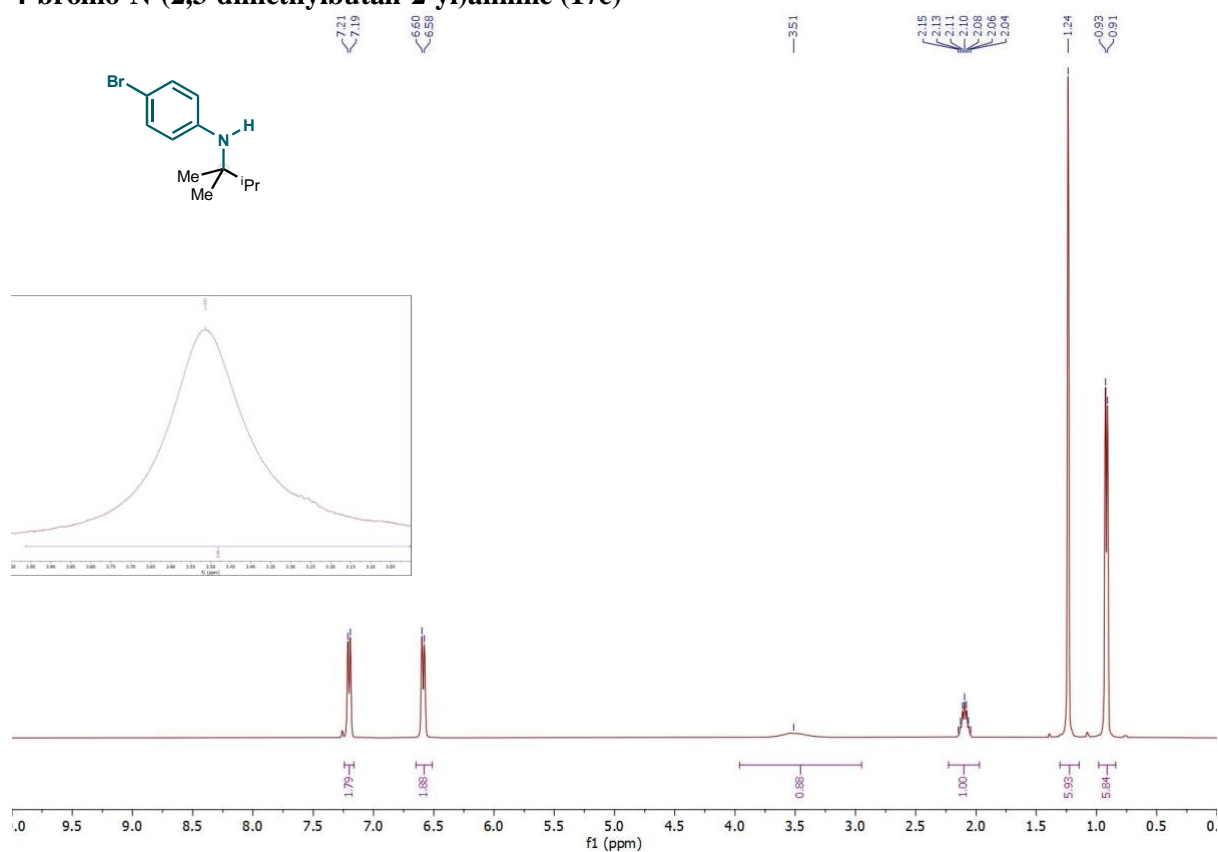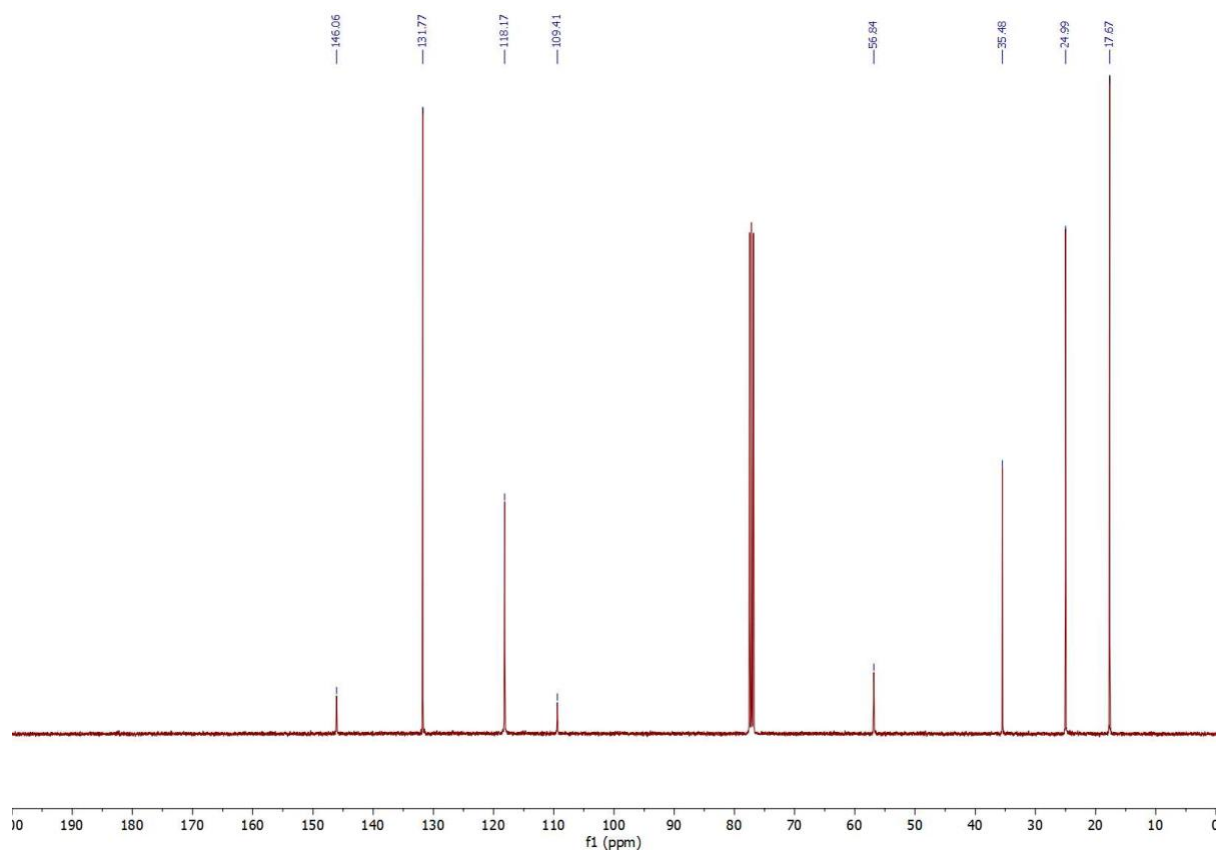

# N-(2,3-dimethylbutan-2-yl)-4-iodoaniline (17d)

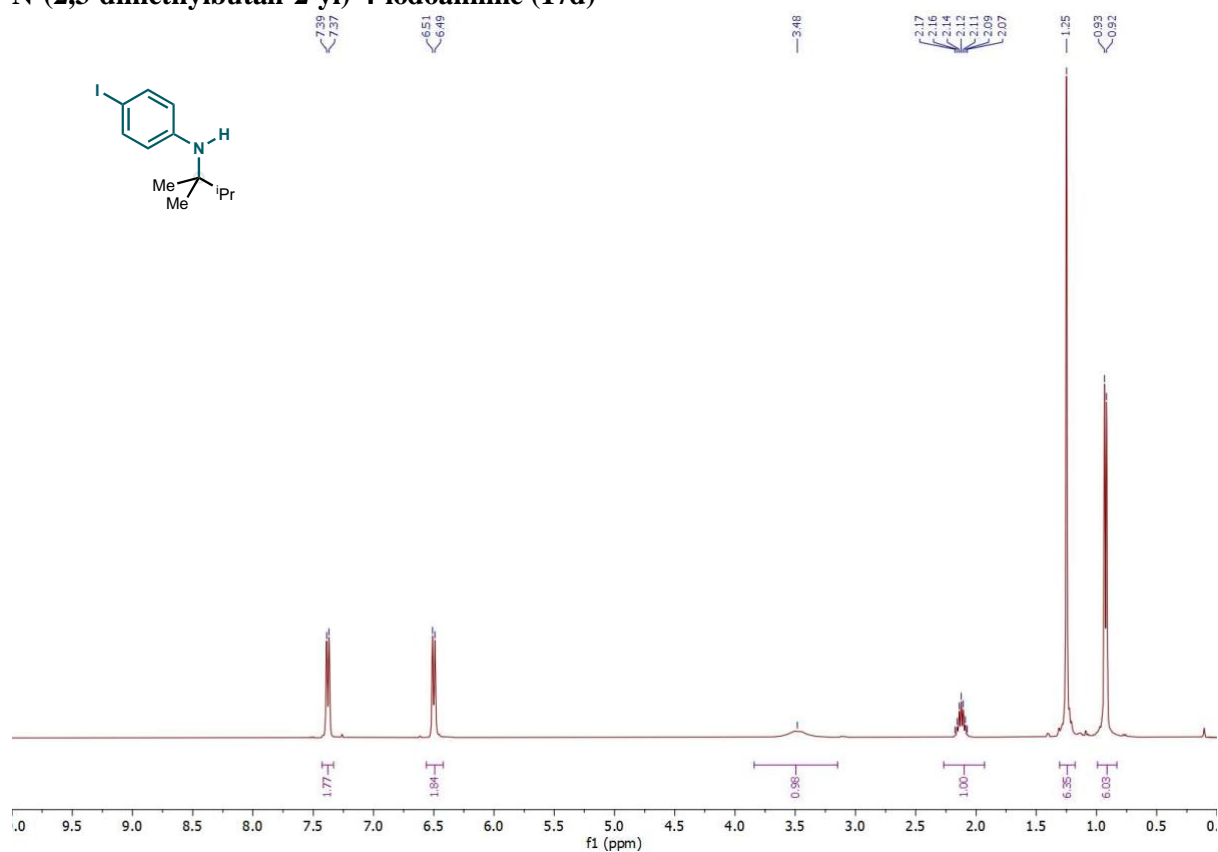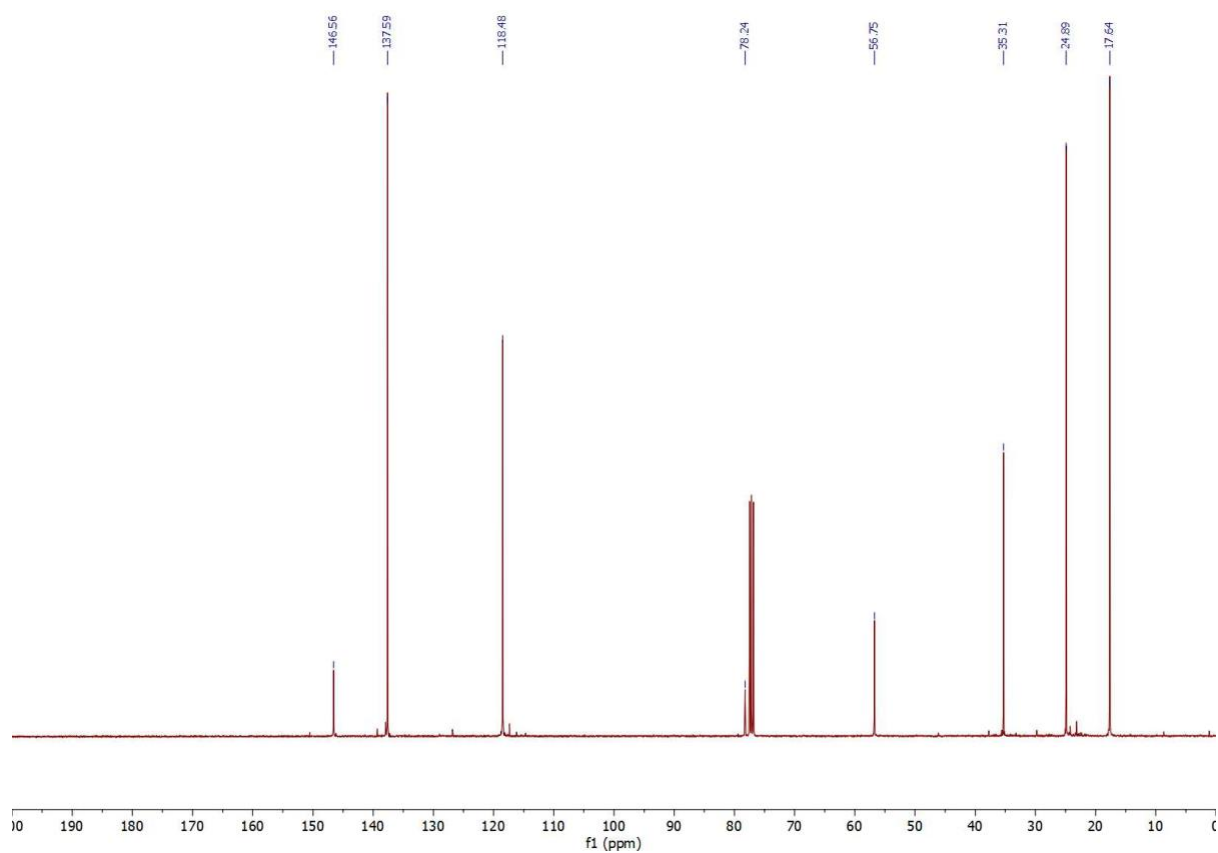

**Ethyl 3-((2,3-dimethylbutan-2-yl)amino)benzoate (17e)**

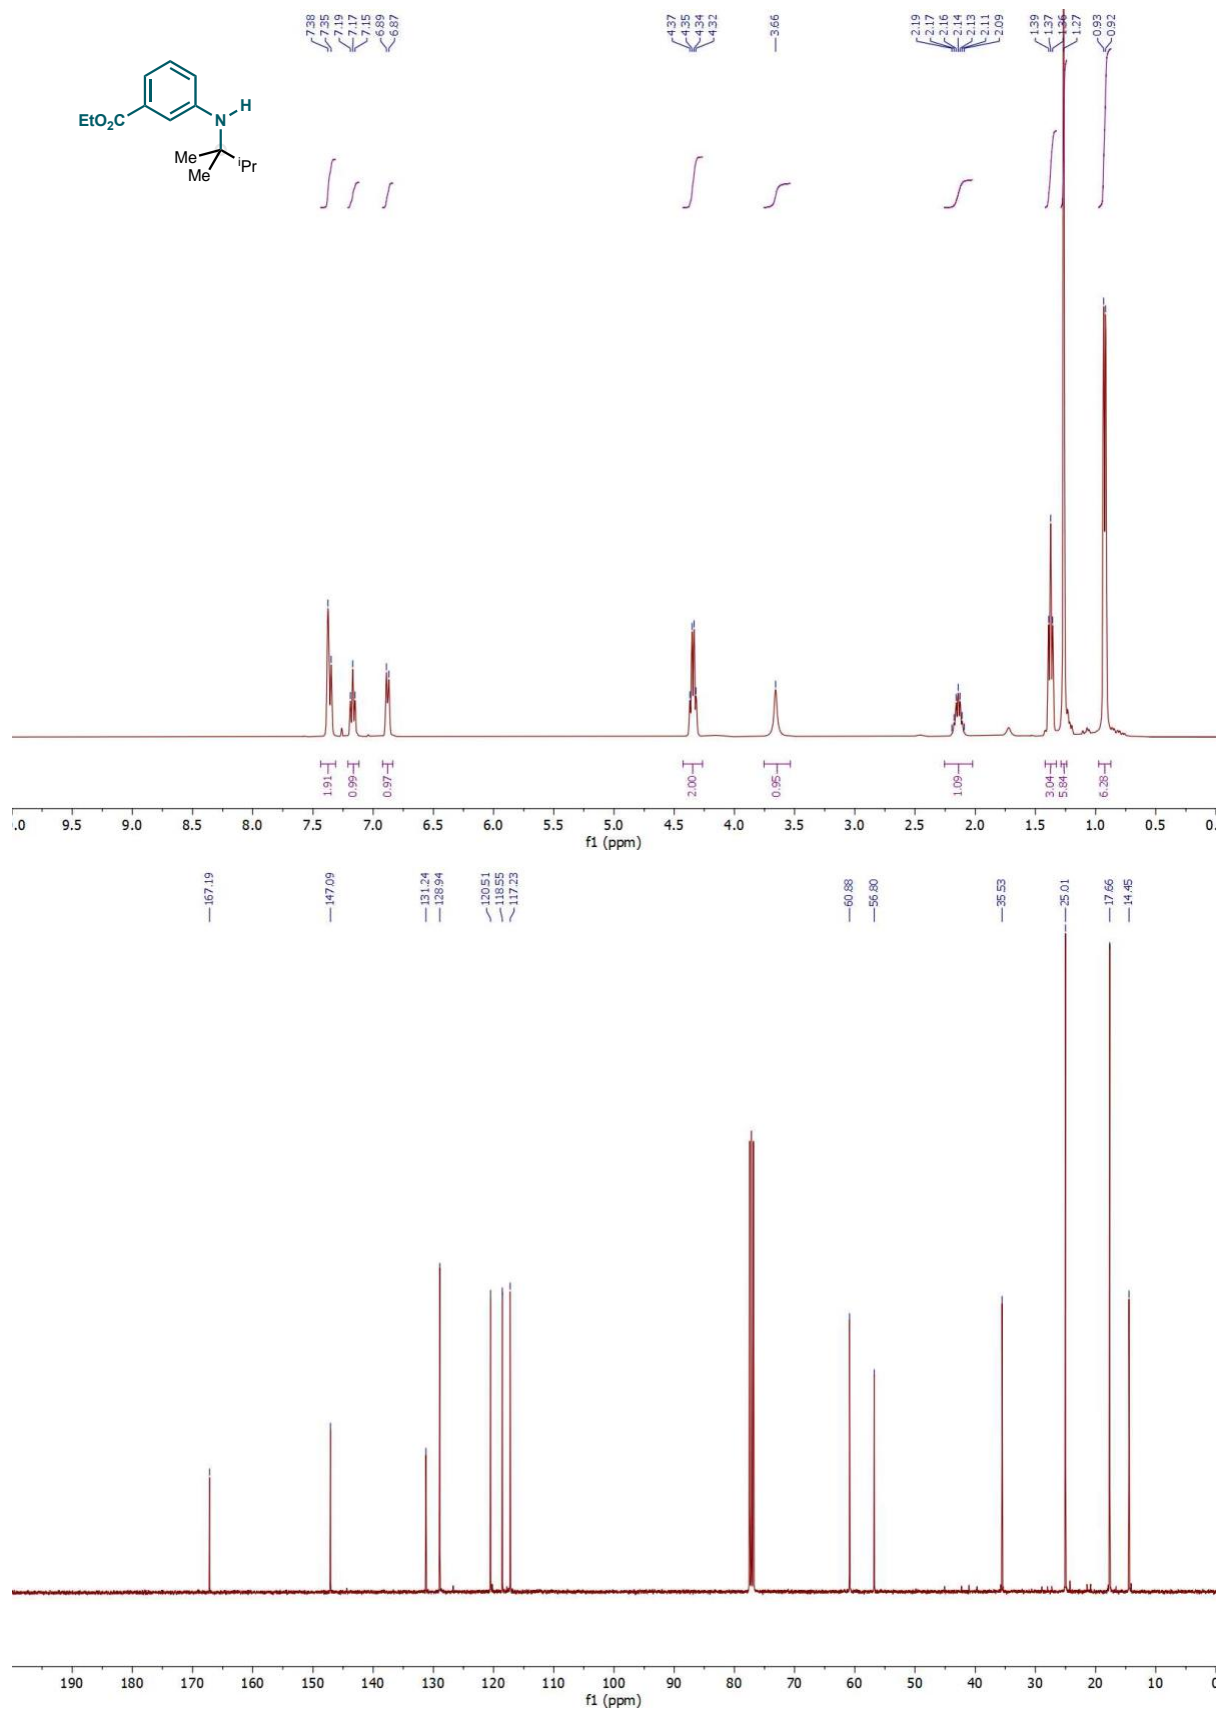

### 3-bromo-N-(2,3-dimethylbutan-2-yl)aniline (17f)

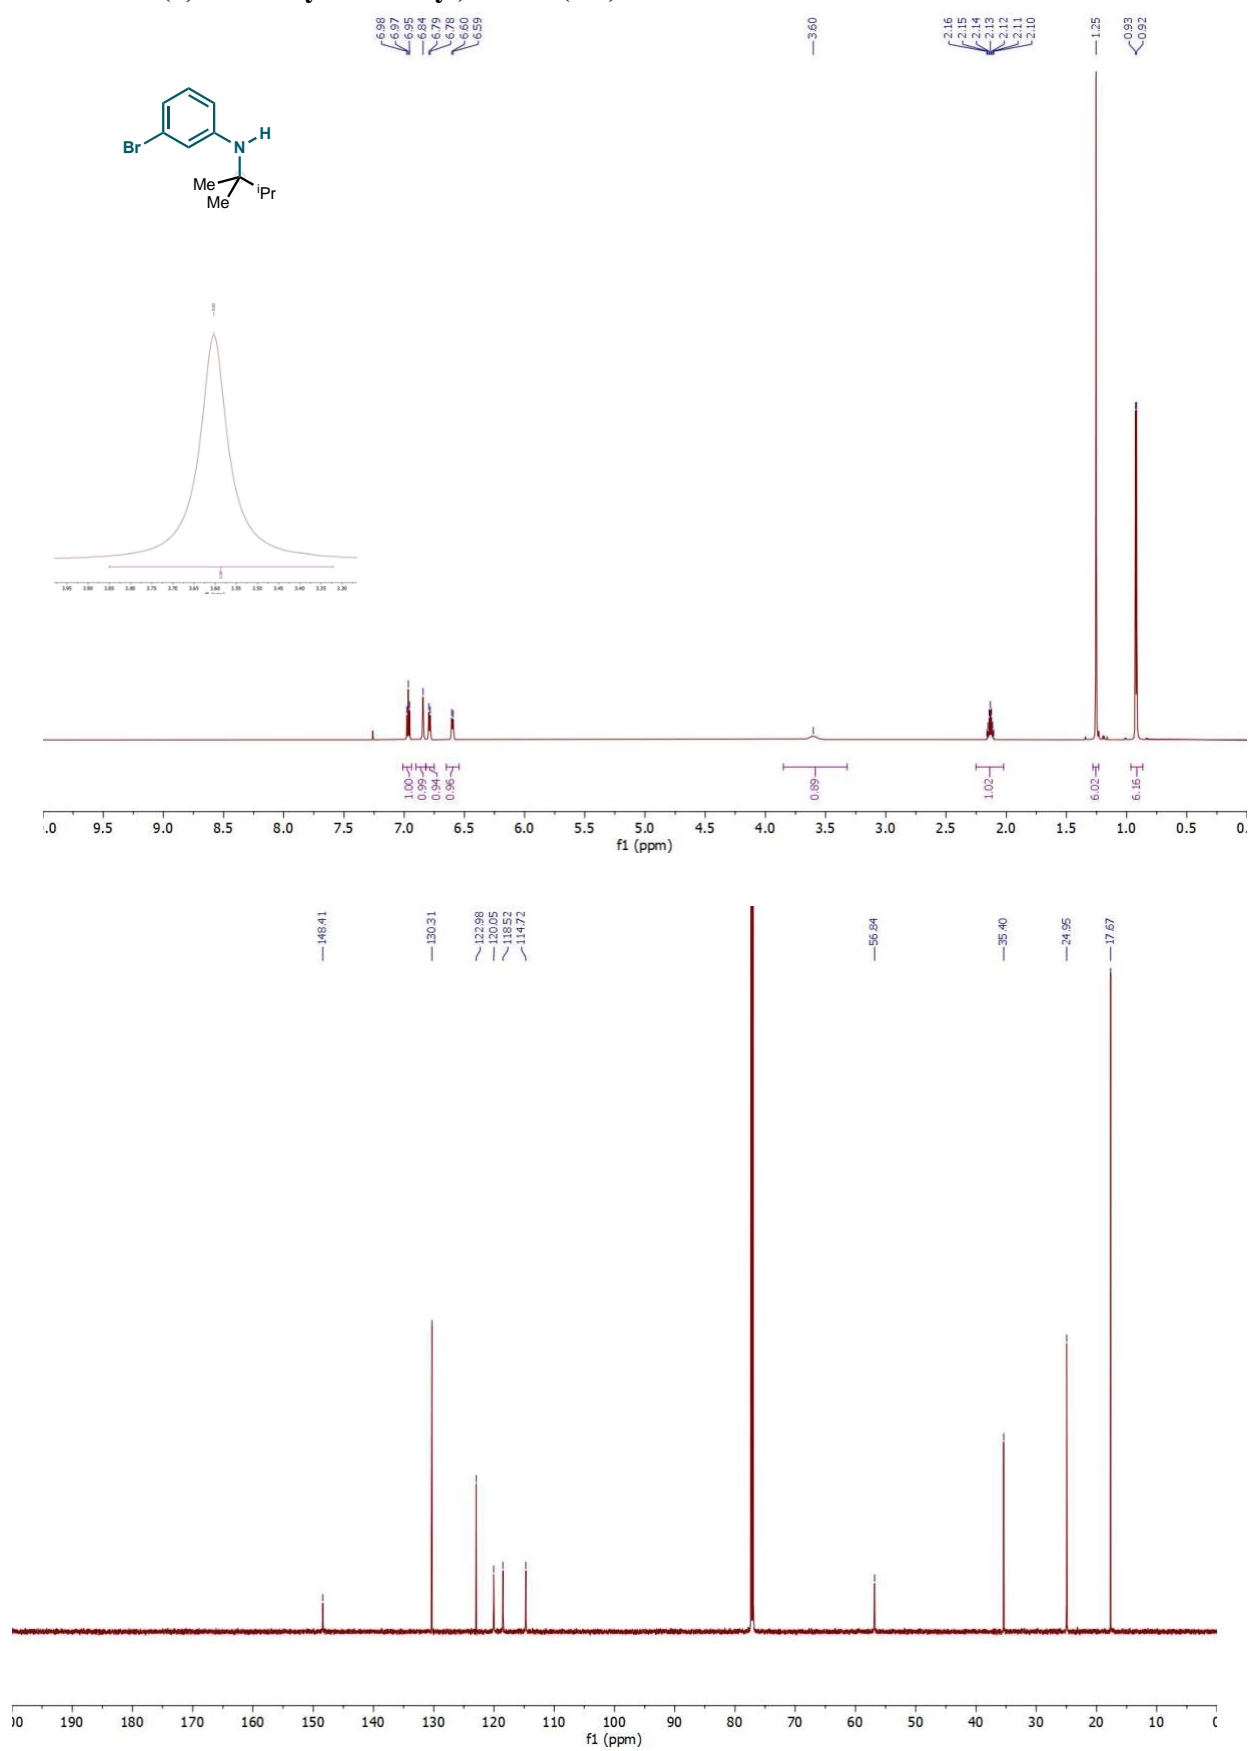

**N-(2,3-dimethylbutan-2-yl)-2-methylaniline (17g)**

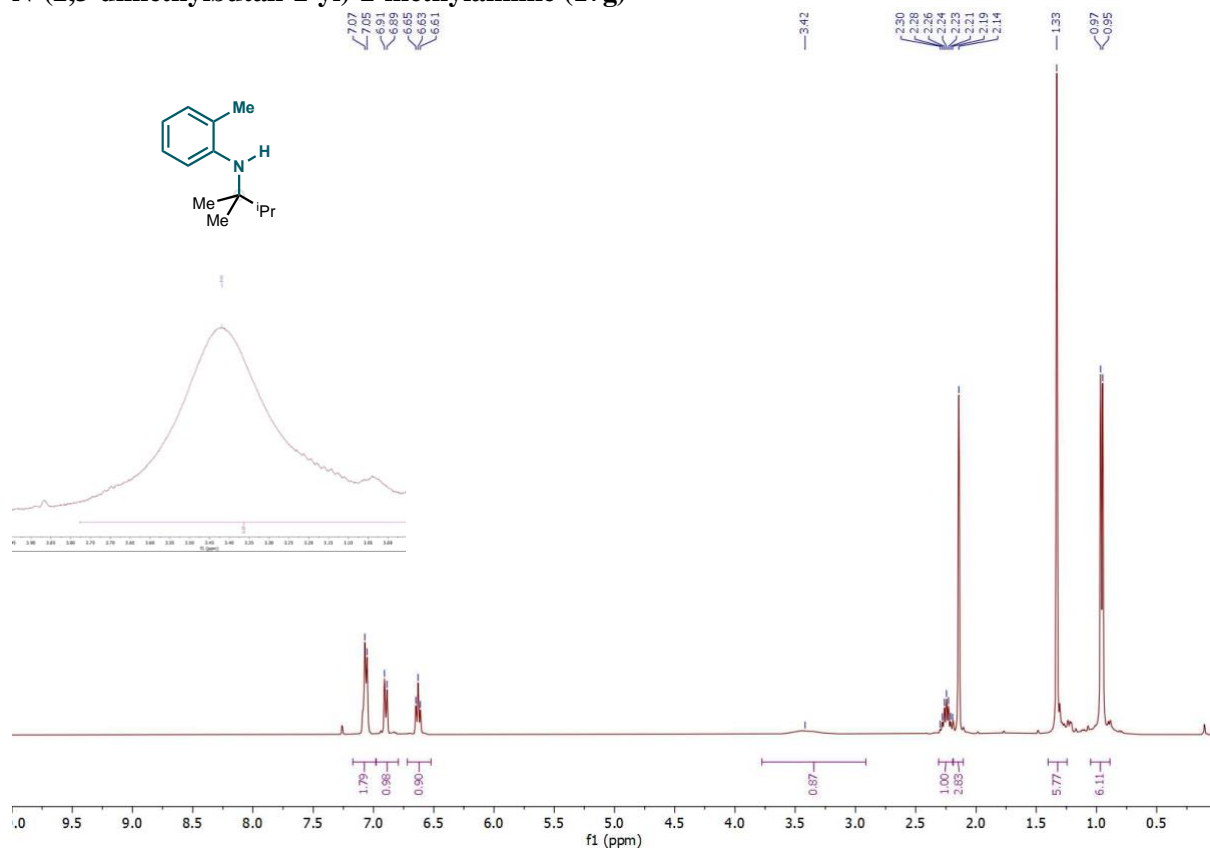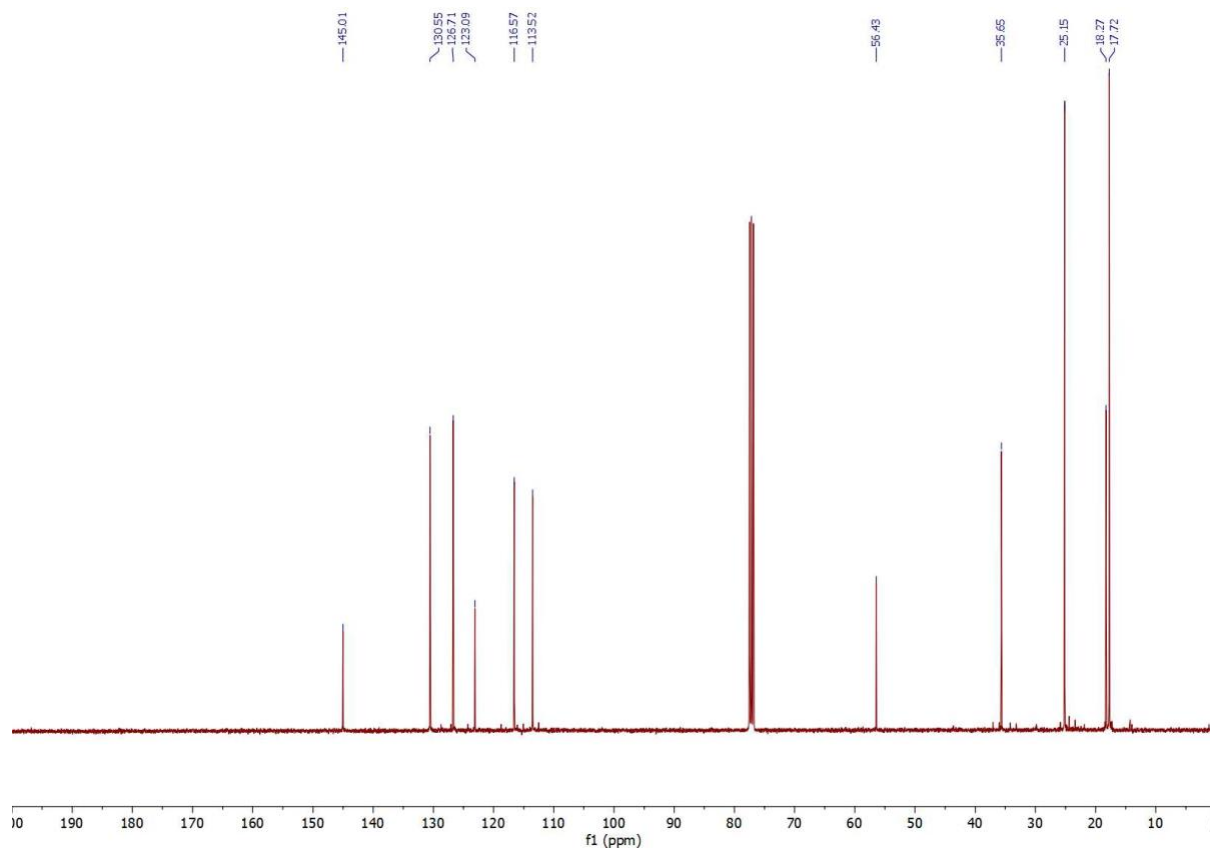

methyl 4-((2,3-dimethylbutan-2-yl)amino)-2-methoxybenzoate (17h)

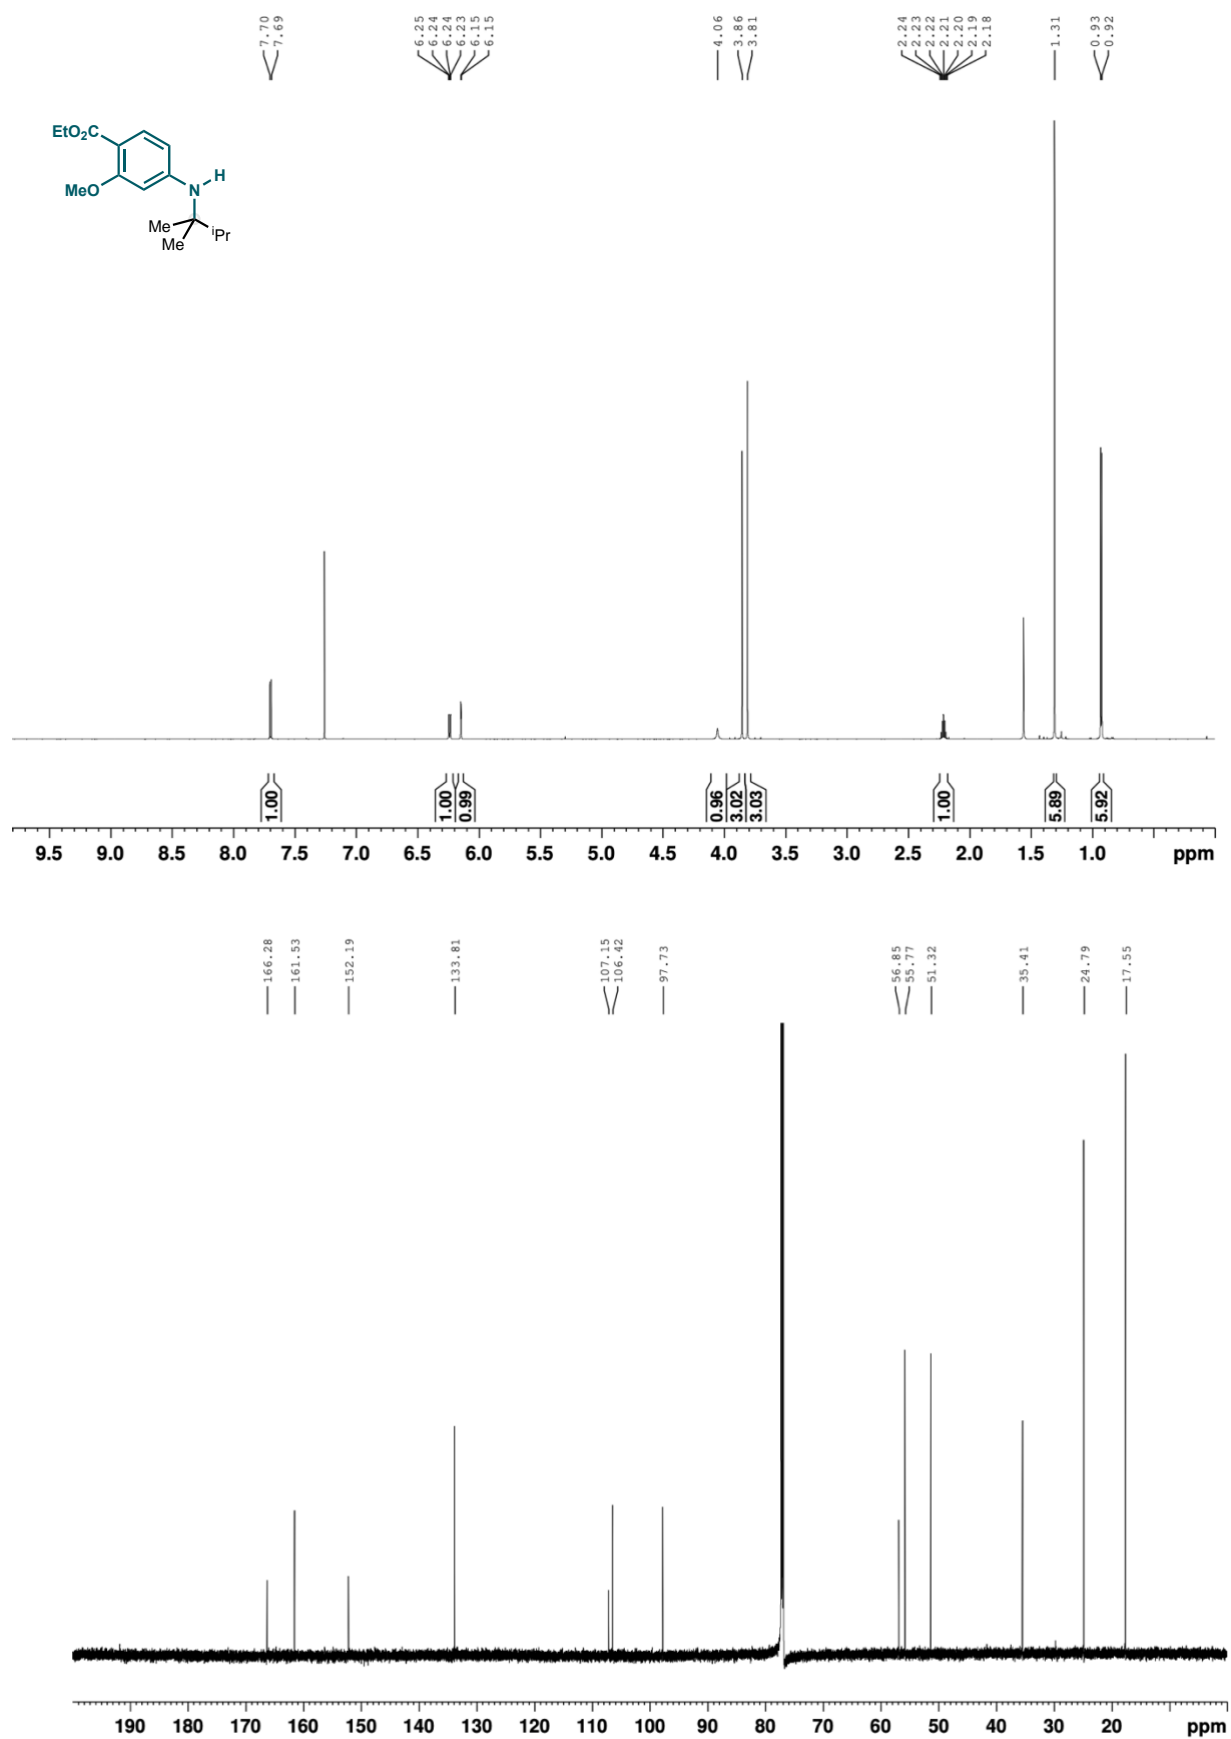

**Benzyl 4-isopropyl-4-(phenethylamino)piperidine-1-carboxylate (18a)**

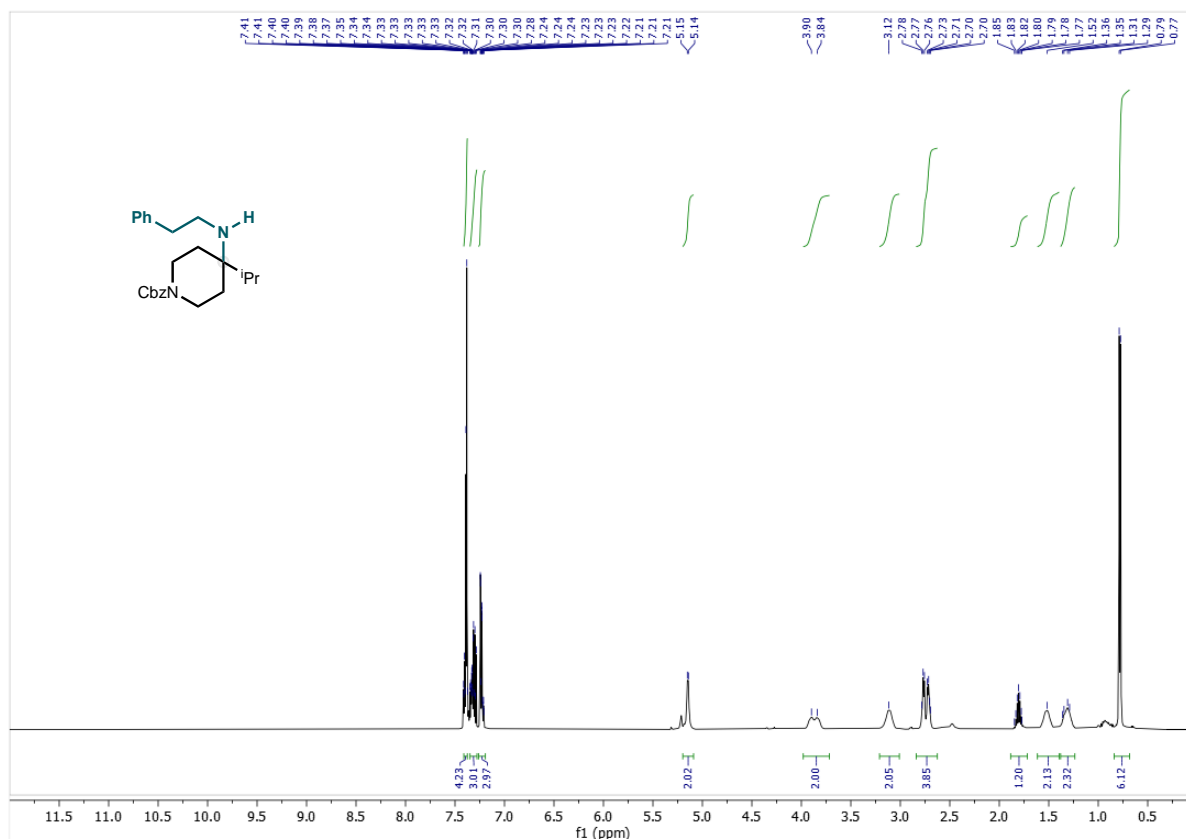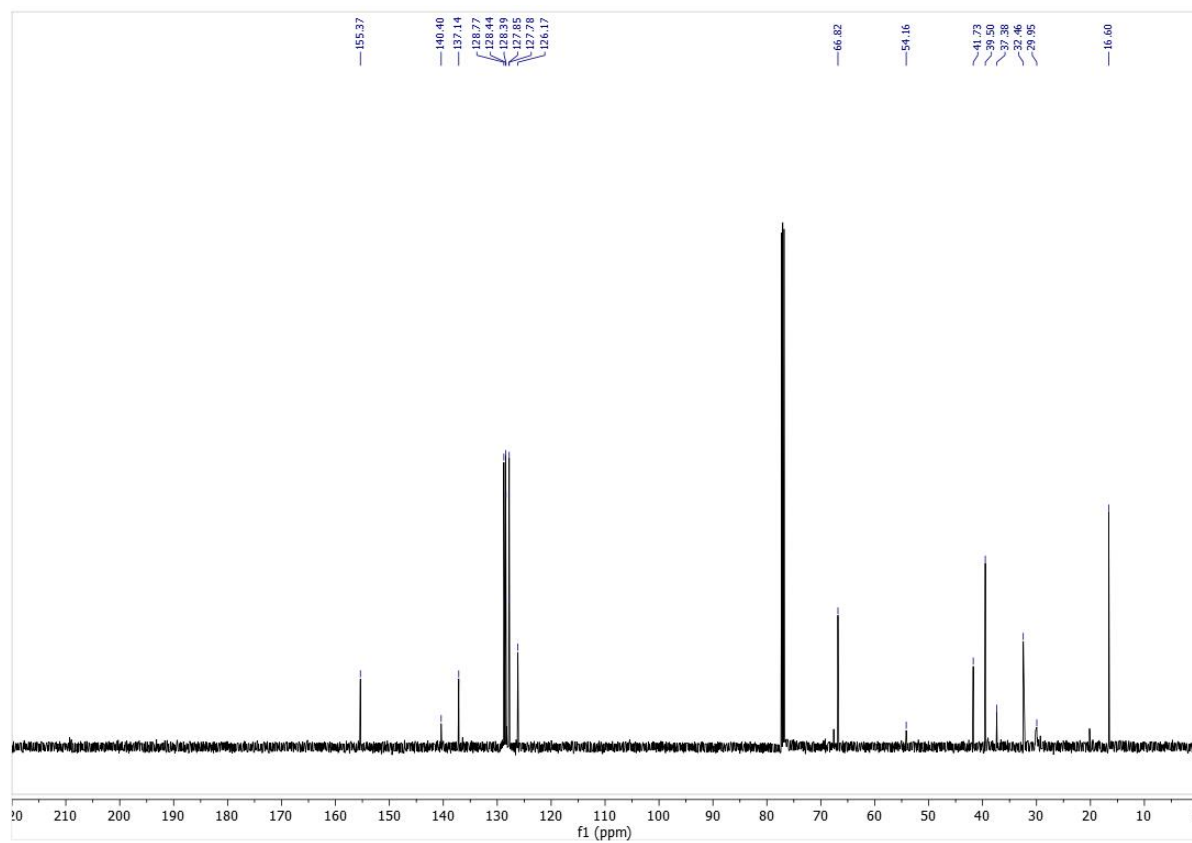



**Benzyl 4-((2-fluoroethyl)amino)-4-isopropylpiperidine-1-carboxylate (18b)**

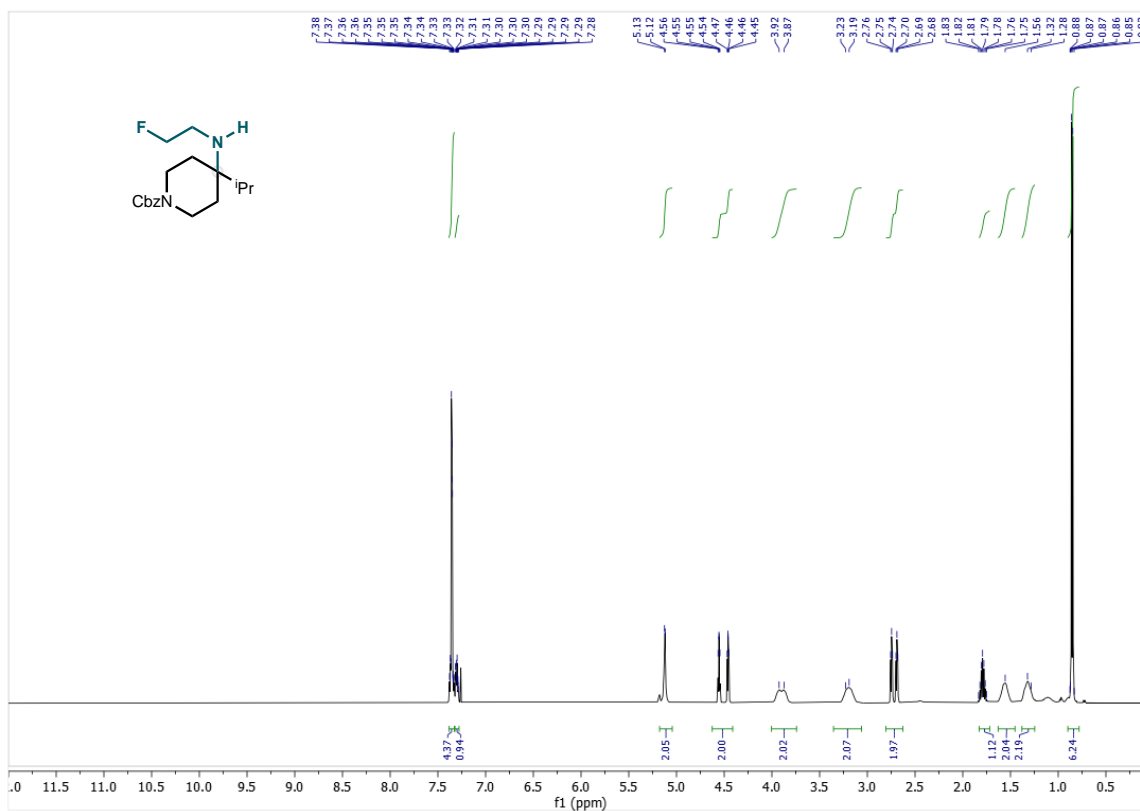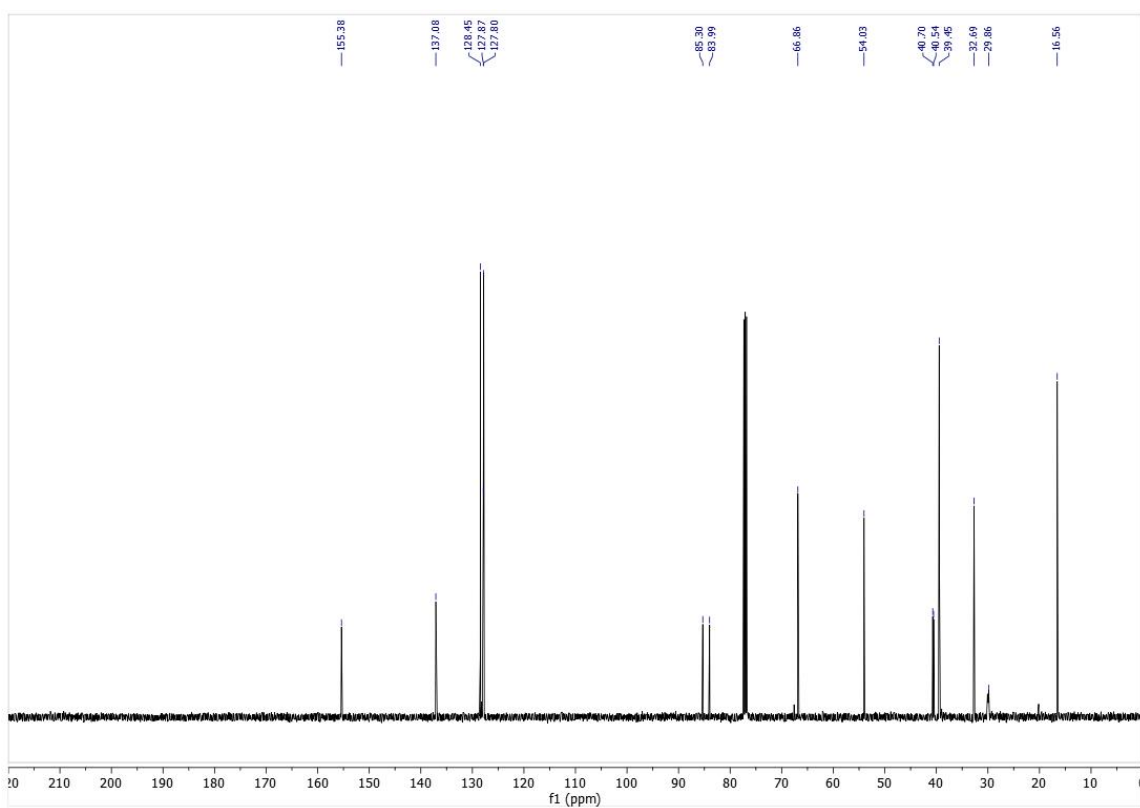

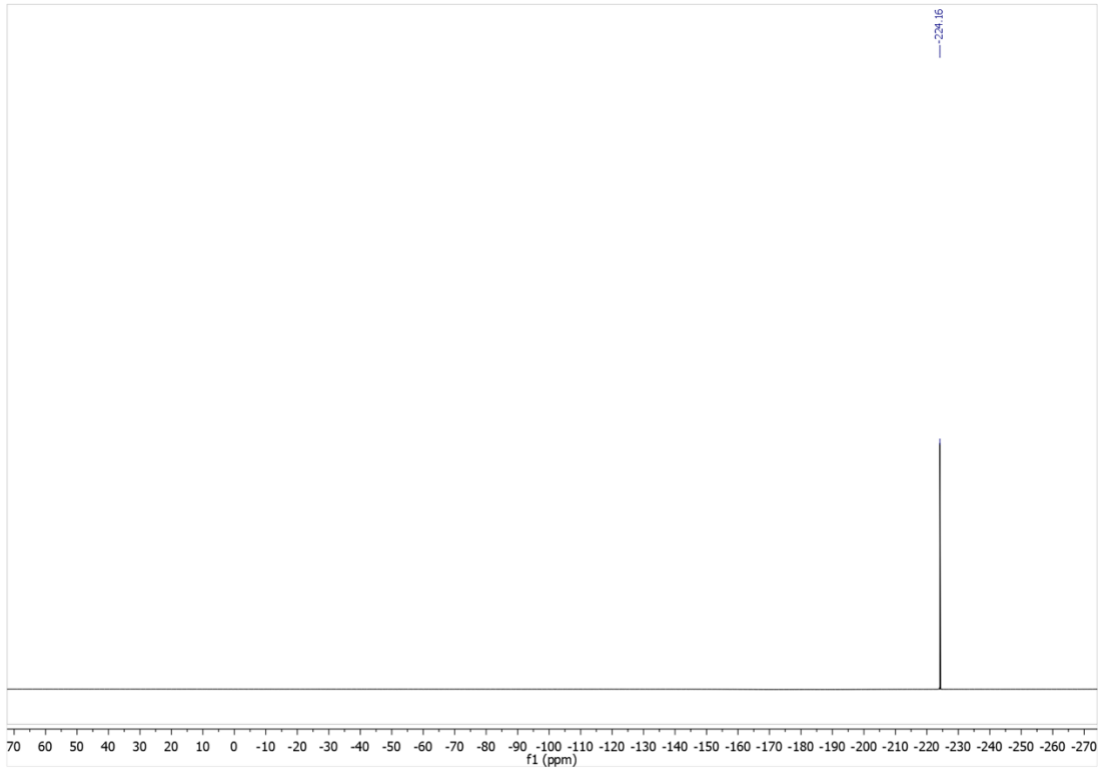

**Benzyl 4-((2-chloroethyl)amino)-4-isopropylpiperidine-1-carboxylate (18c)**

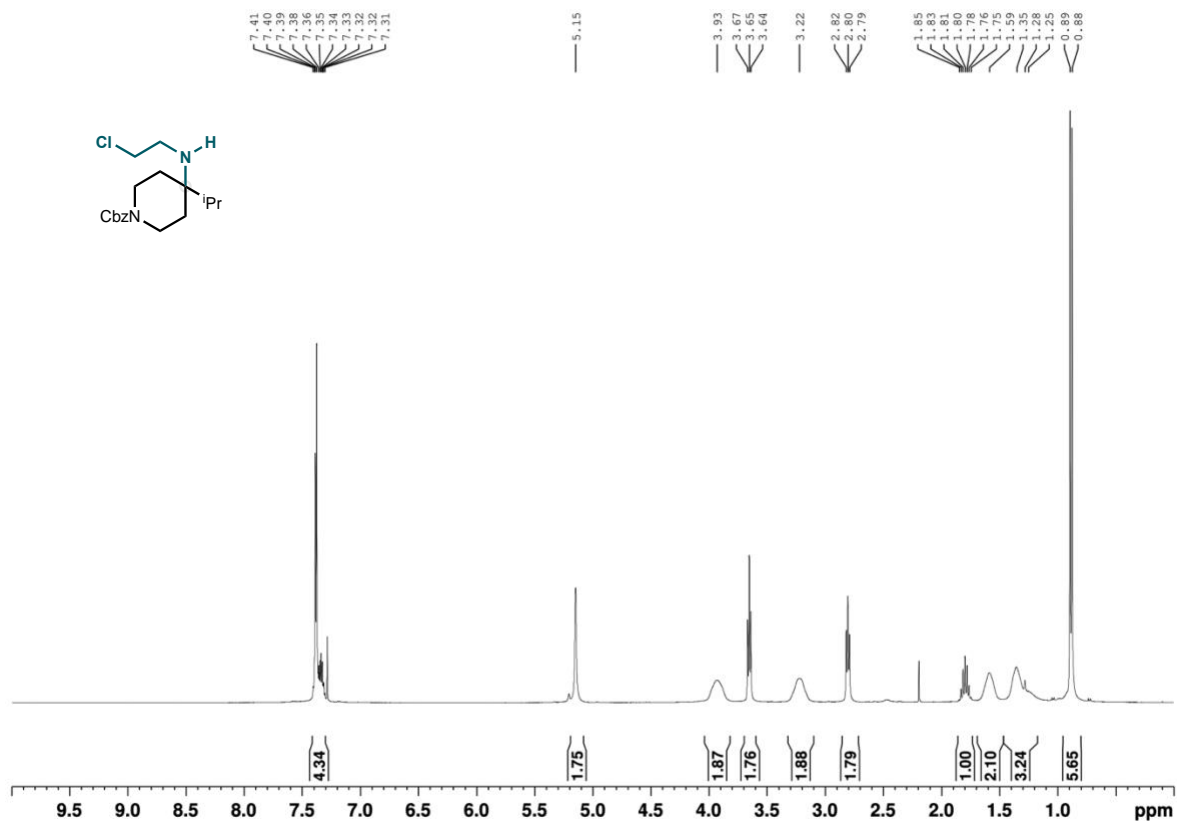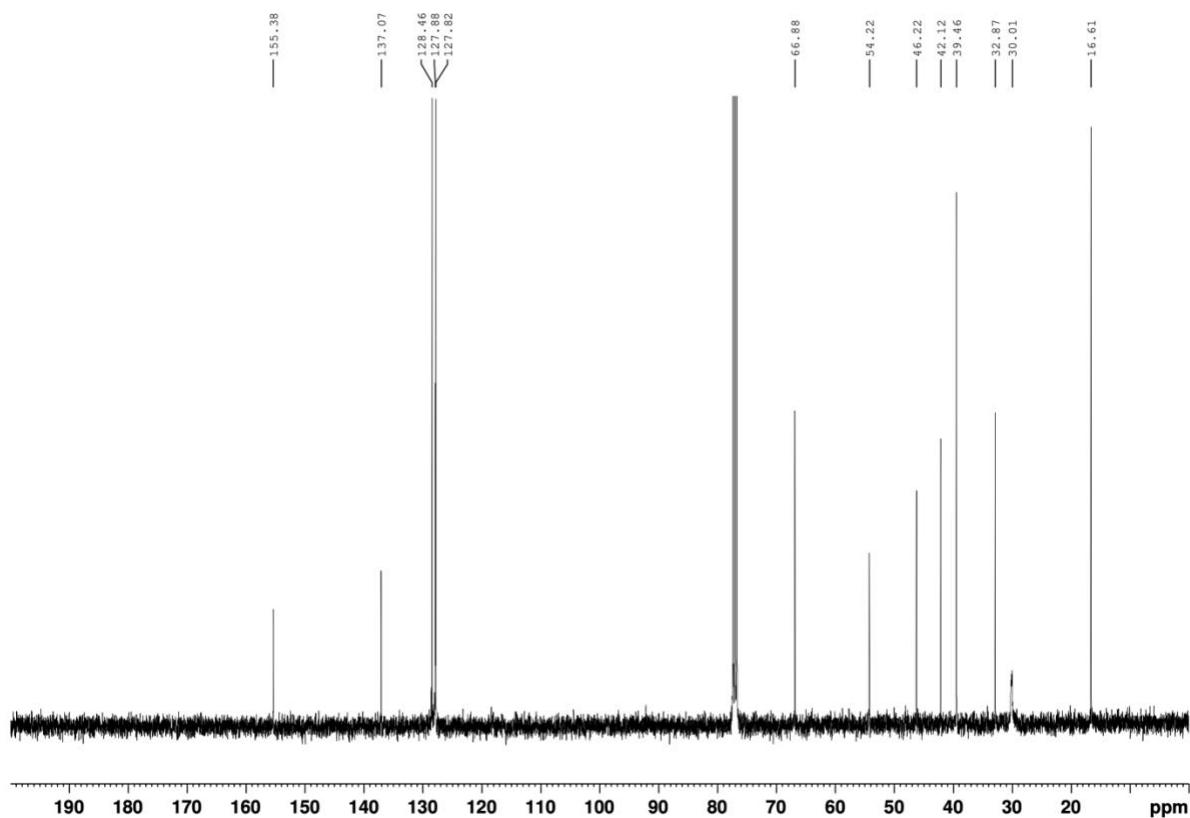

**Benzyl 4-isopropyl-4-(methylamino)piperidine-1-carboxylate (18d)**

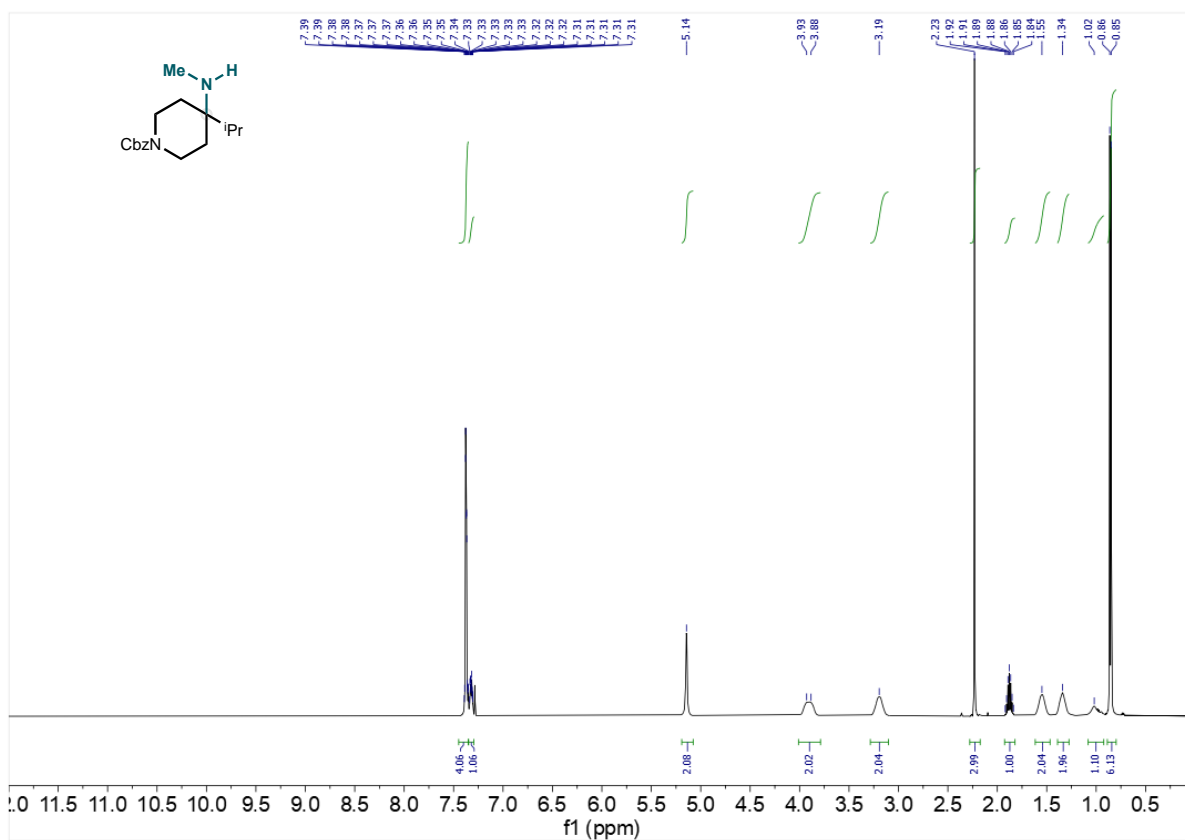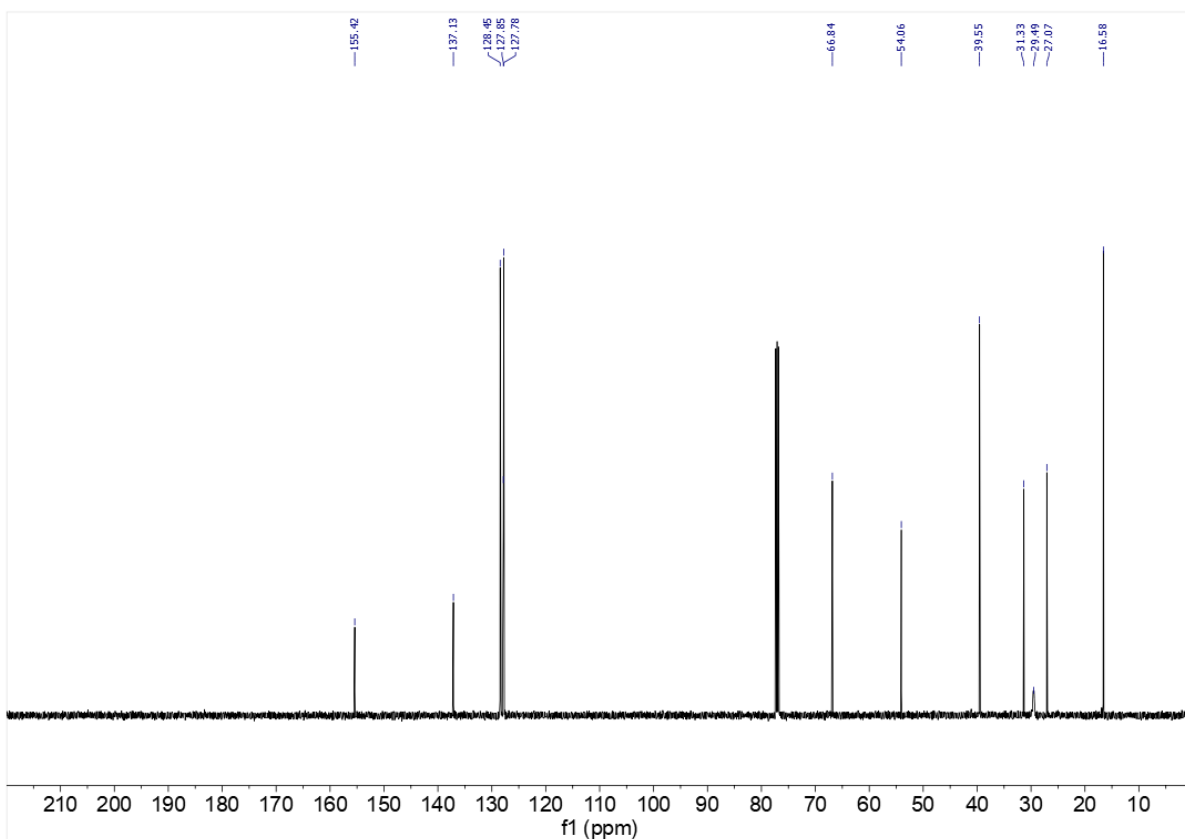

**Benzyl 4-(benzylamino)-4-isopropylpiperidine-1-carboxylate (18e)**

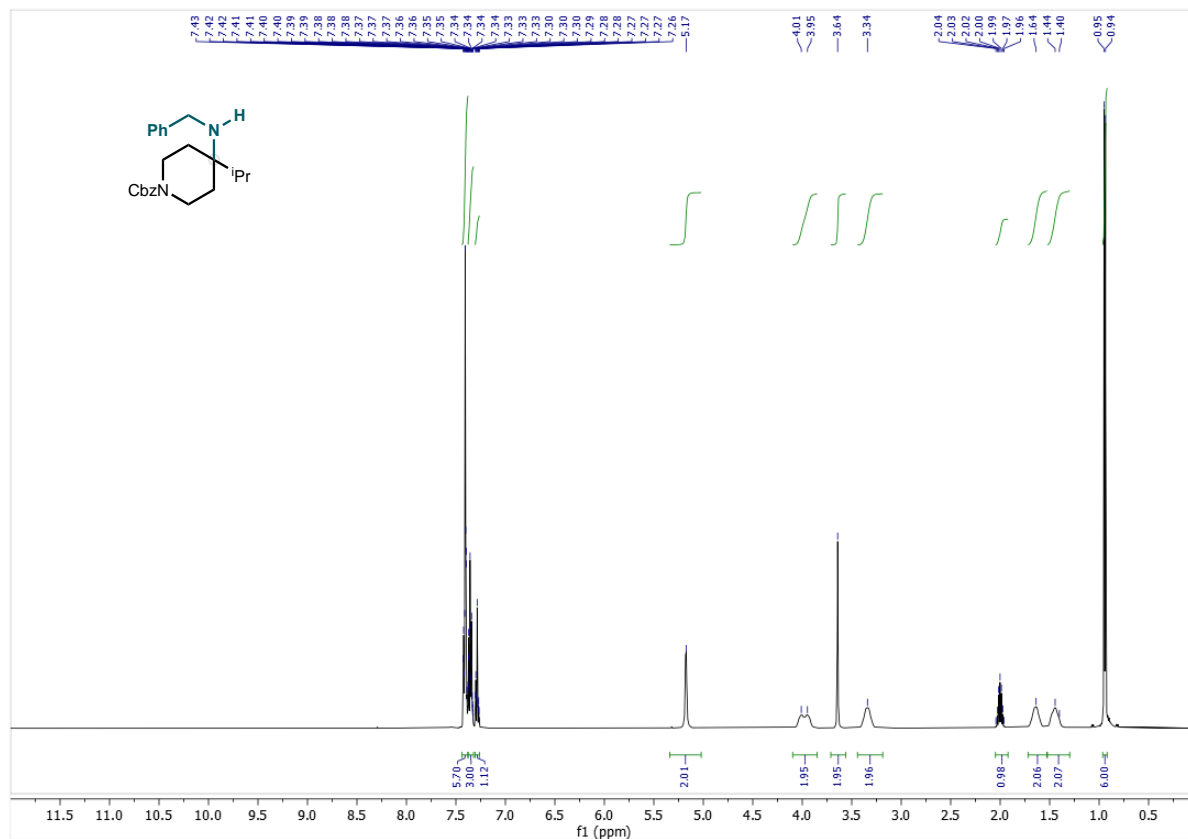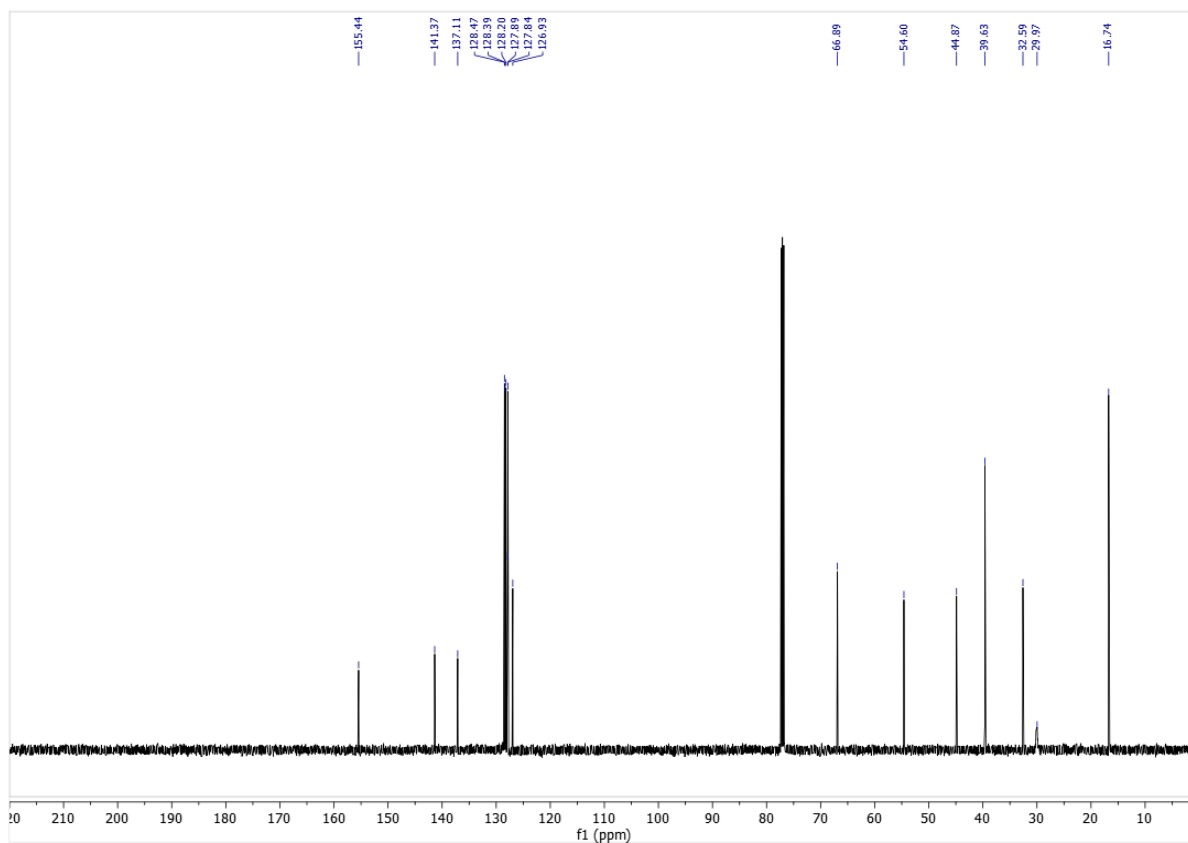

**Benzyl 4-(but-3-en-1-ylamino)-4-isopropylpiperidine-1-carboxylate (18f)**

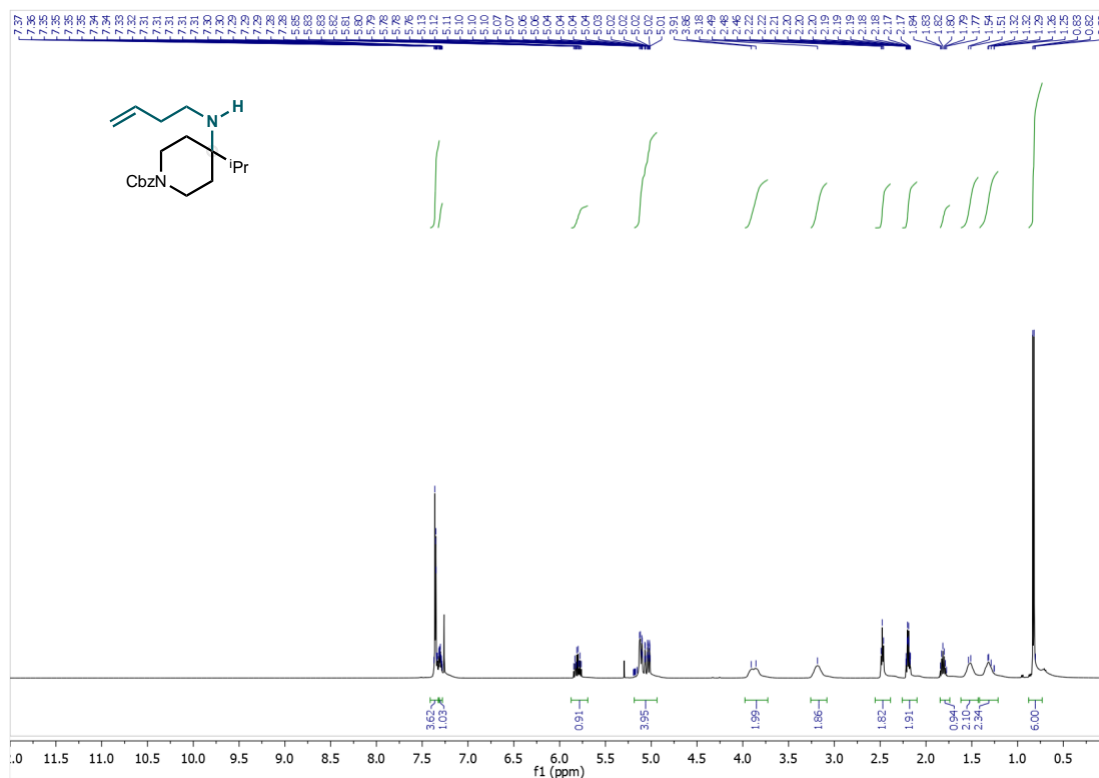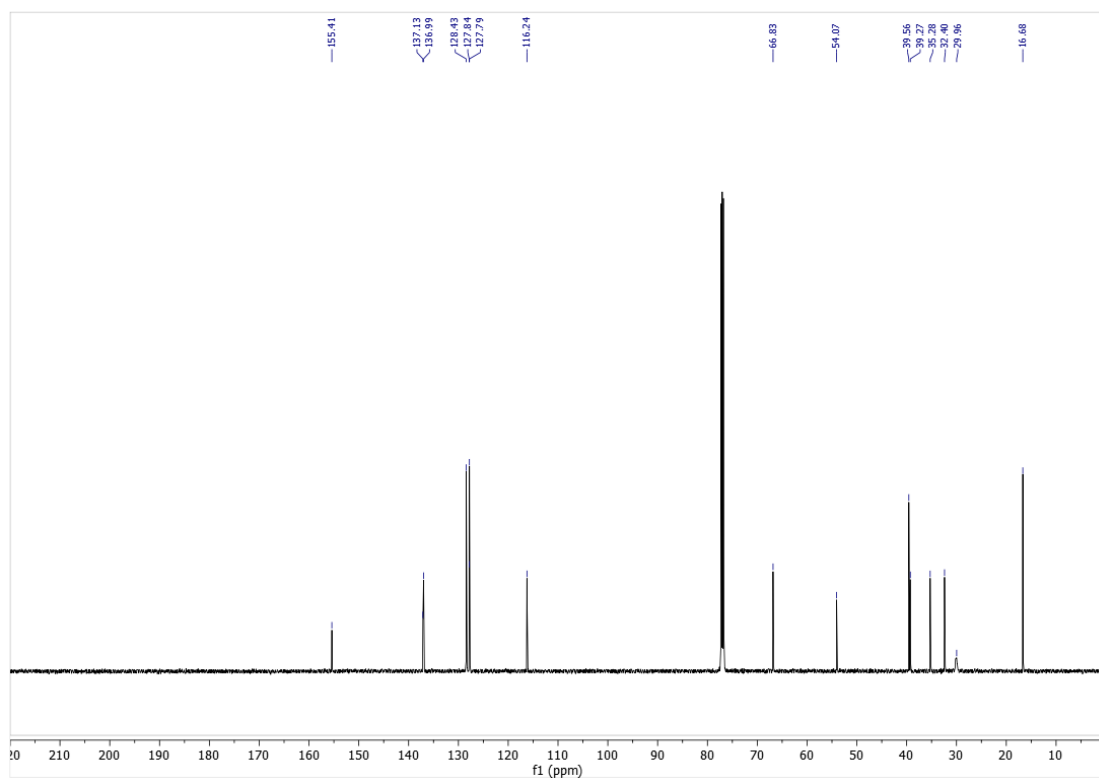

**Benzyl 4-isopropyl-4-((2-(thiophen-2-yl)ethyl)amino)piperidine-1-carboxylate (18g)**

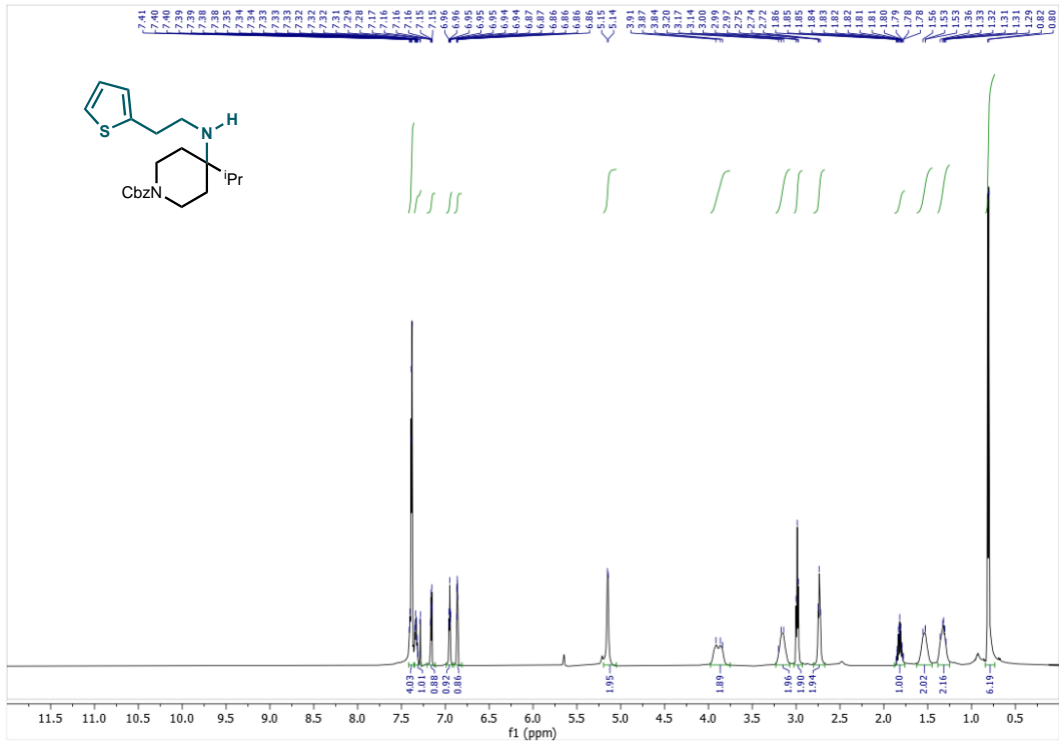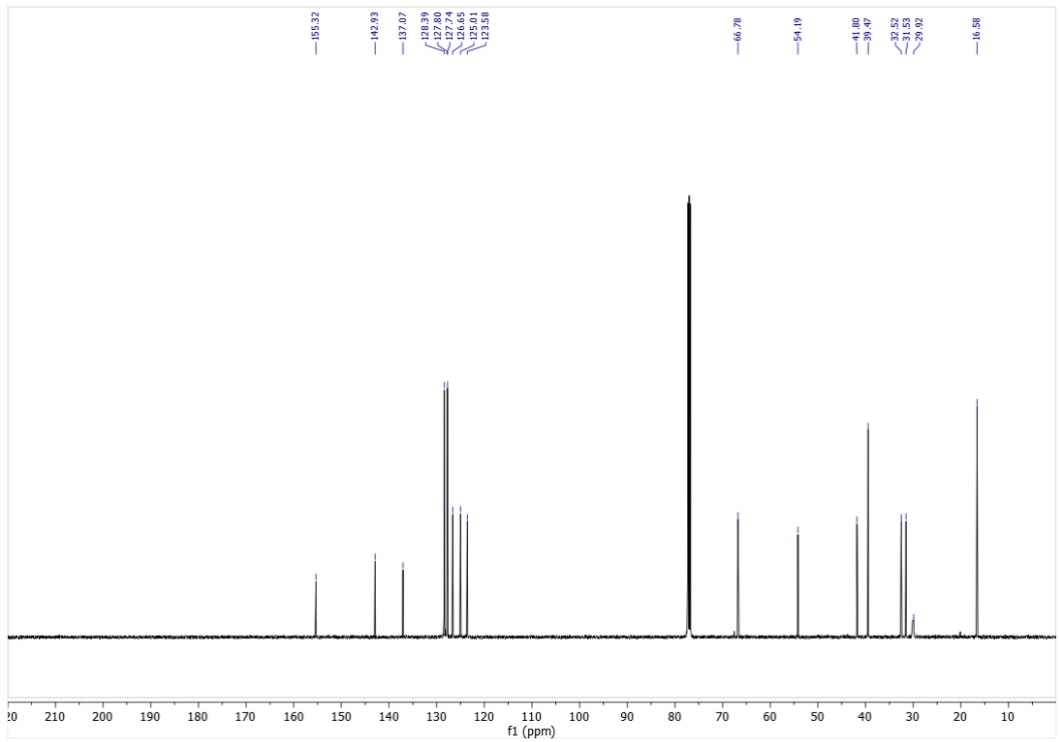

# N-(1-isopropylcyclobutyl)-4-methoxyaniline (19a)

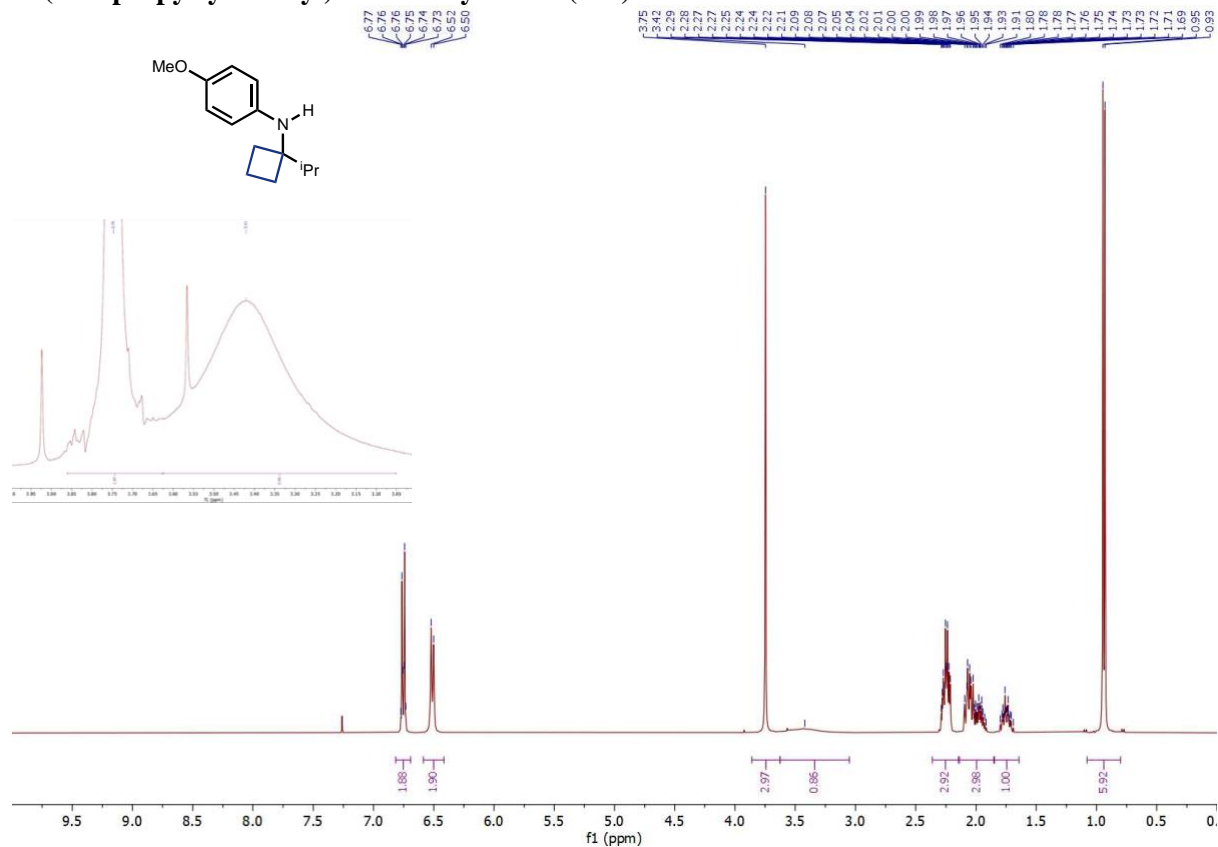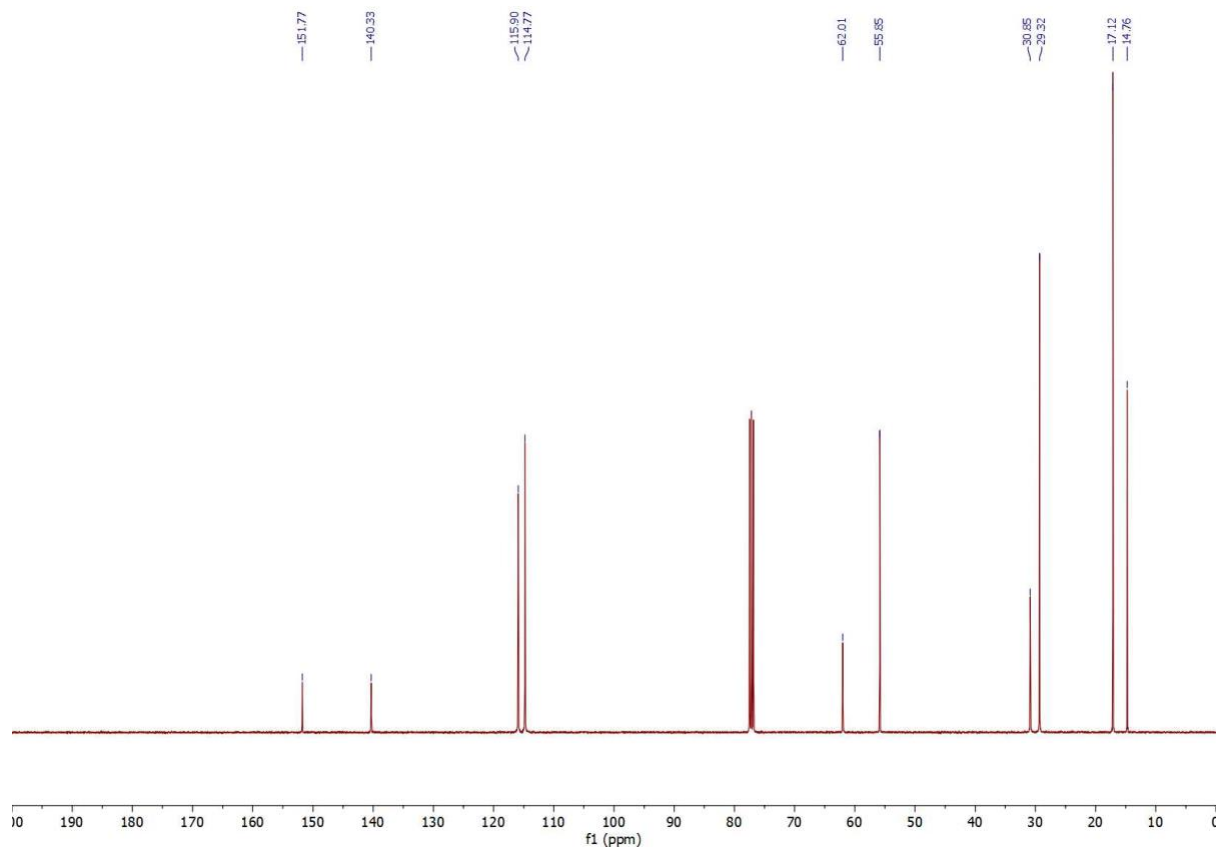



# N-(1-isopropylcyclopentyl)-4-methoxyaniline (19b)

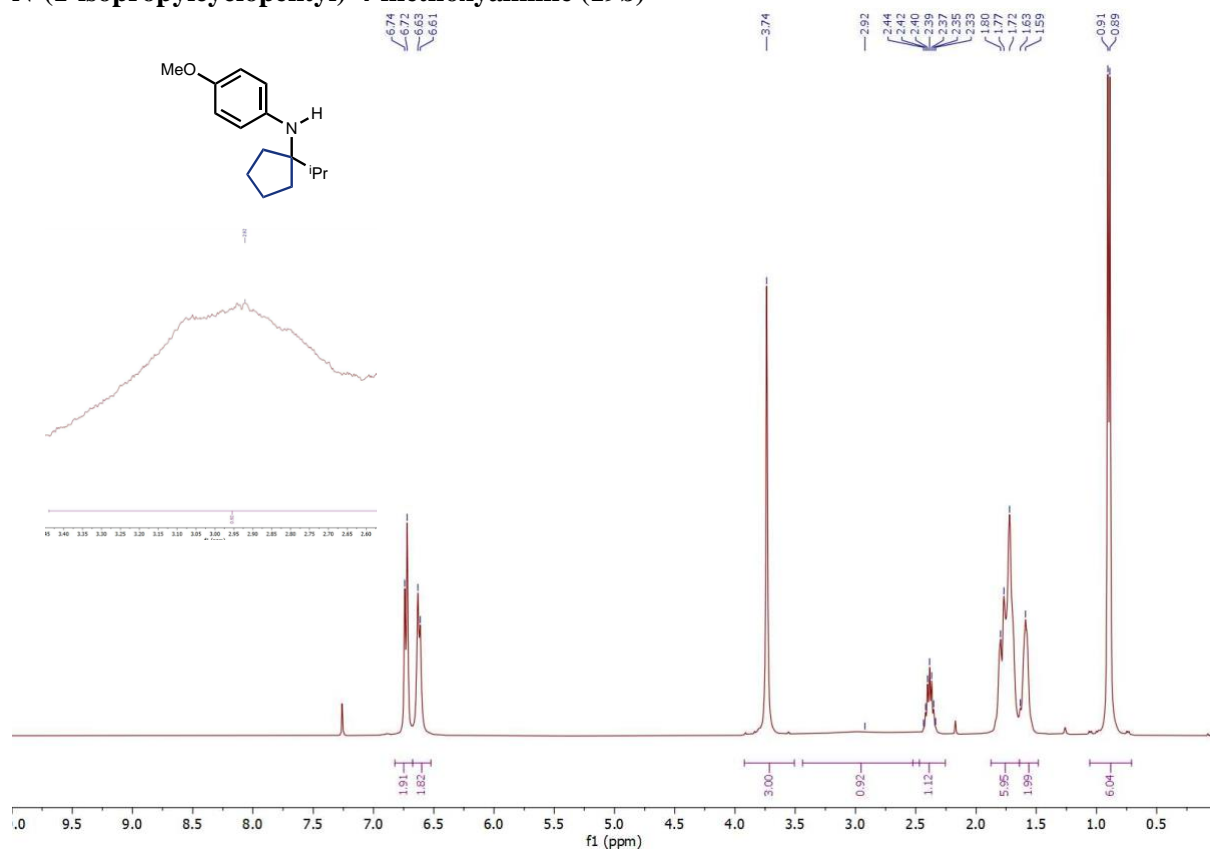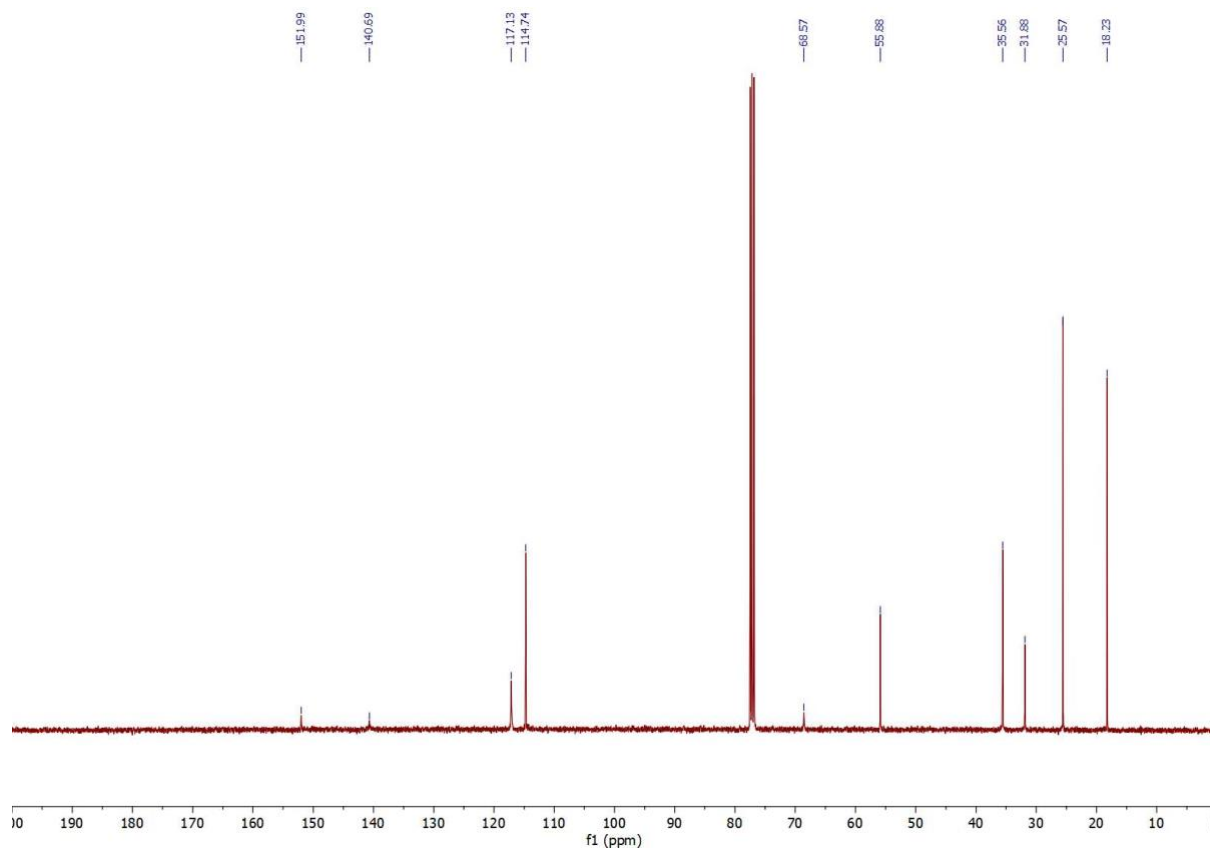

# N-(1-isopropylcyclohexyl)-4-methoxyaniline (19c)

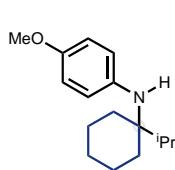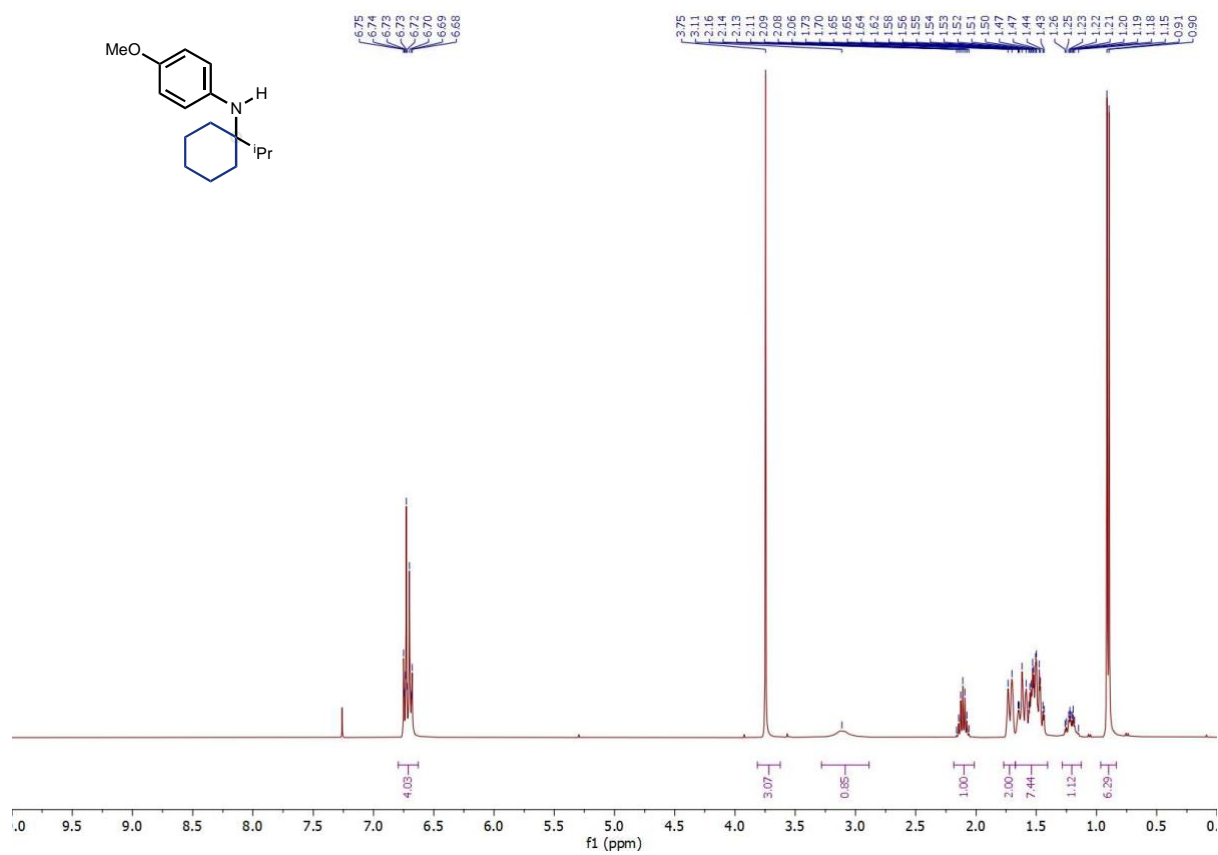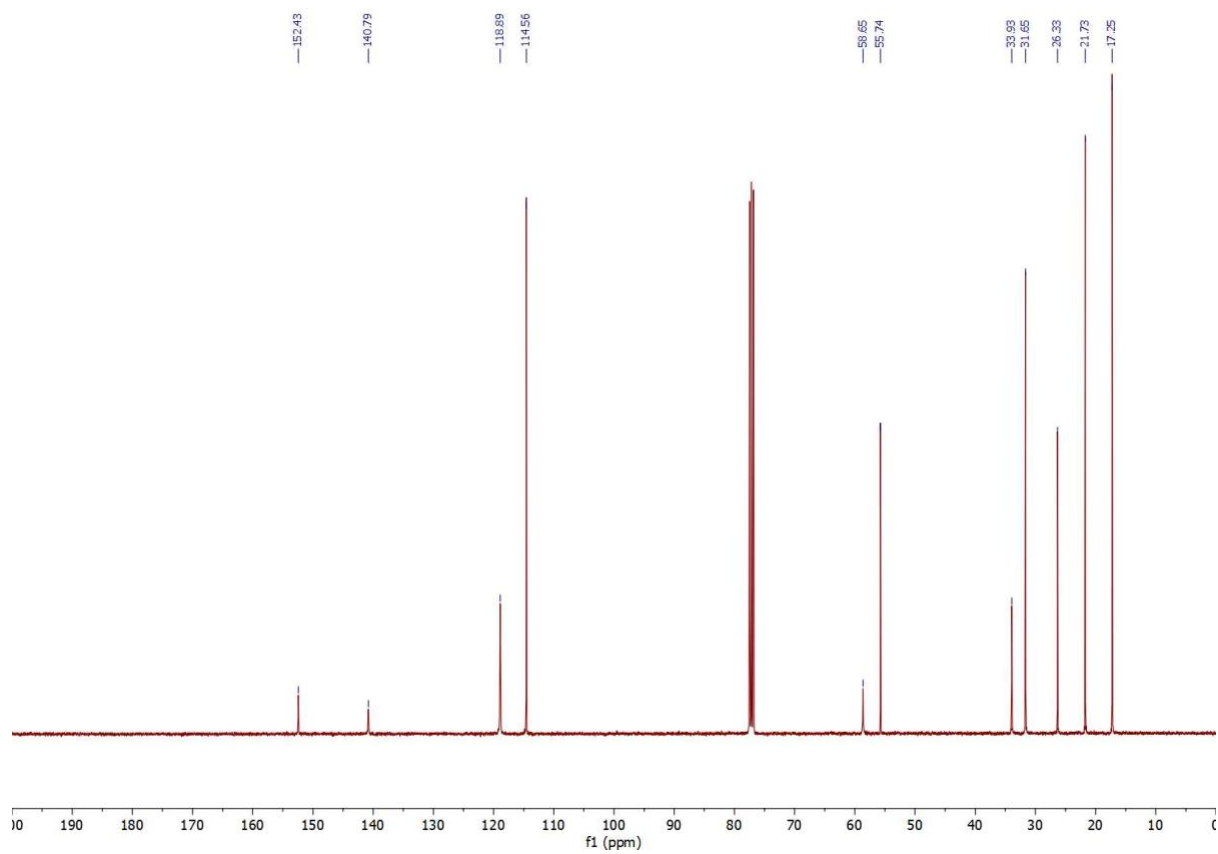

# N-(1-isopropyl-4-phenylcyclohexyl)-4-methoxyaniline (19d)

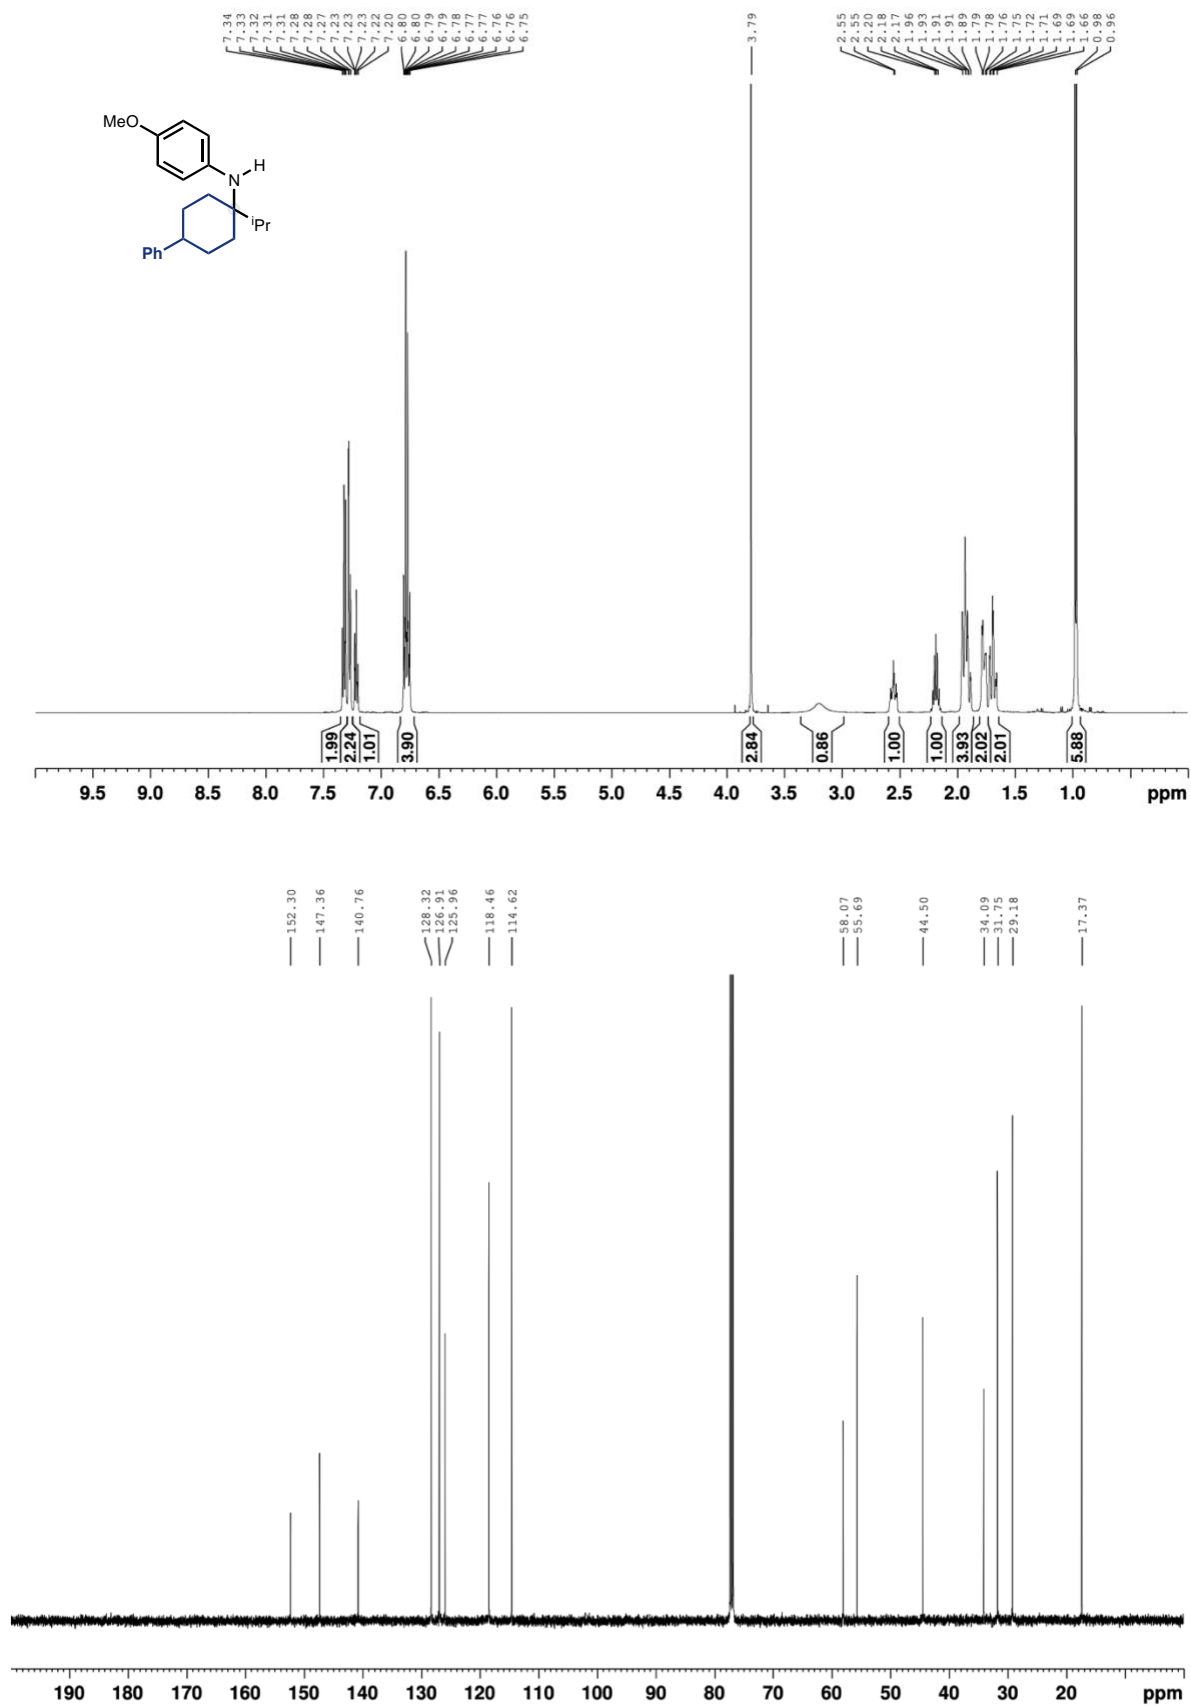

# 4-isopropyl-N-(4-methoxyphenyl)tetrahydro-2H-pyran-4-amine (19e)

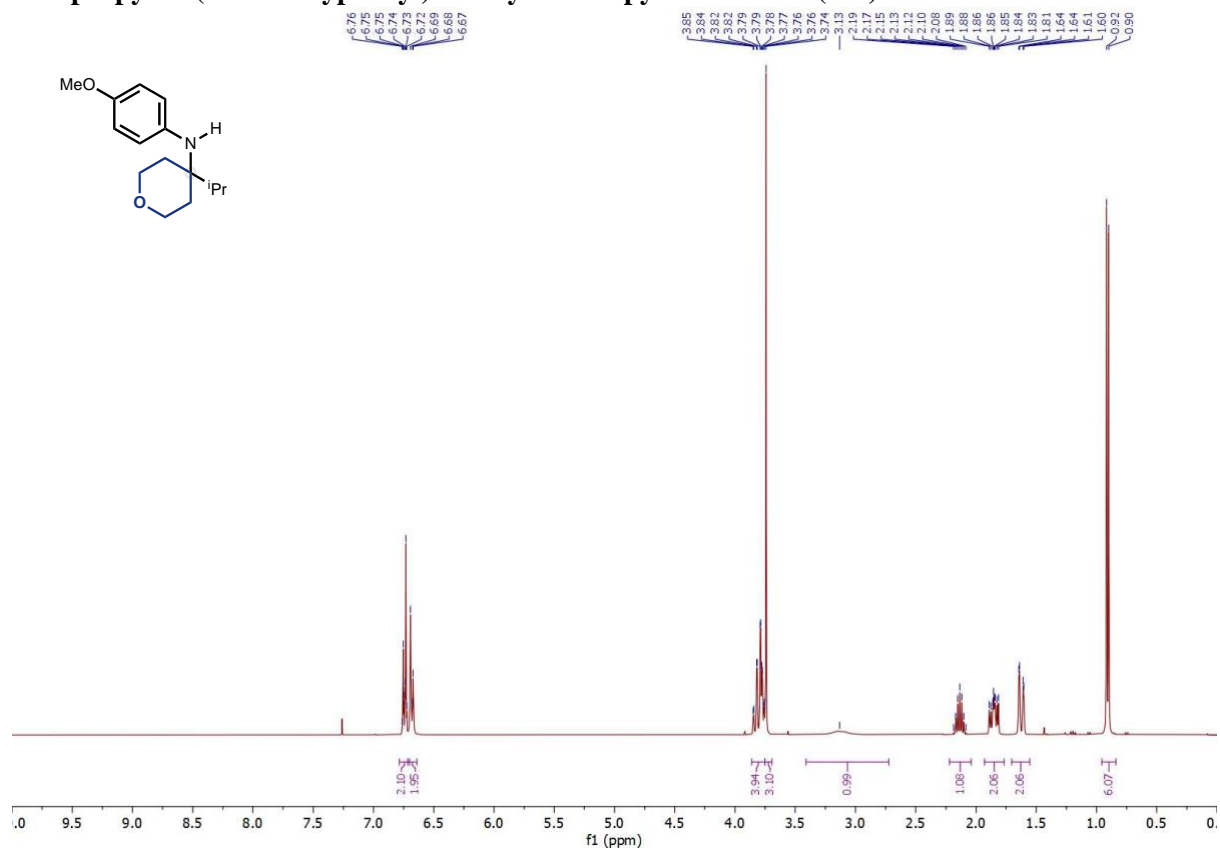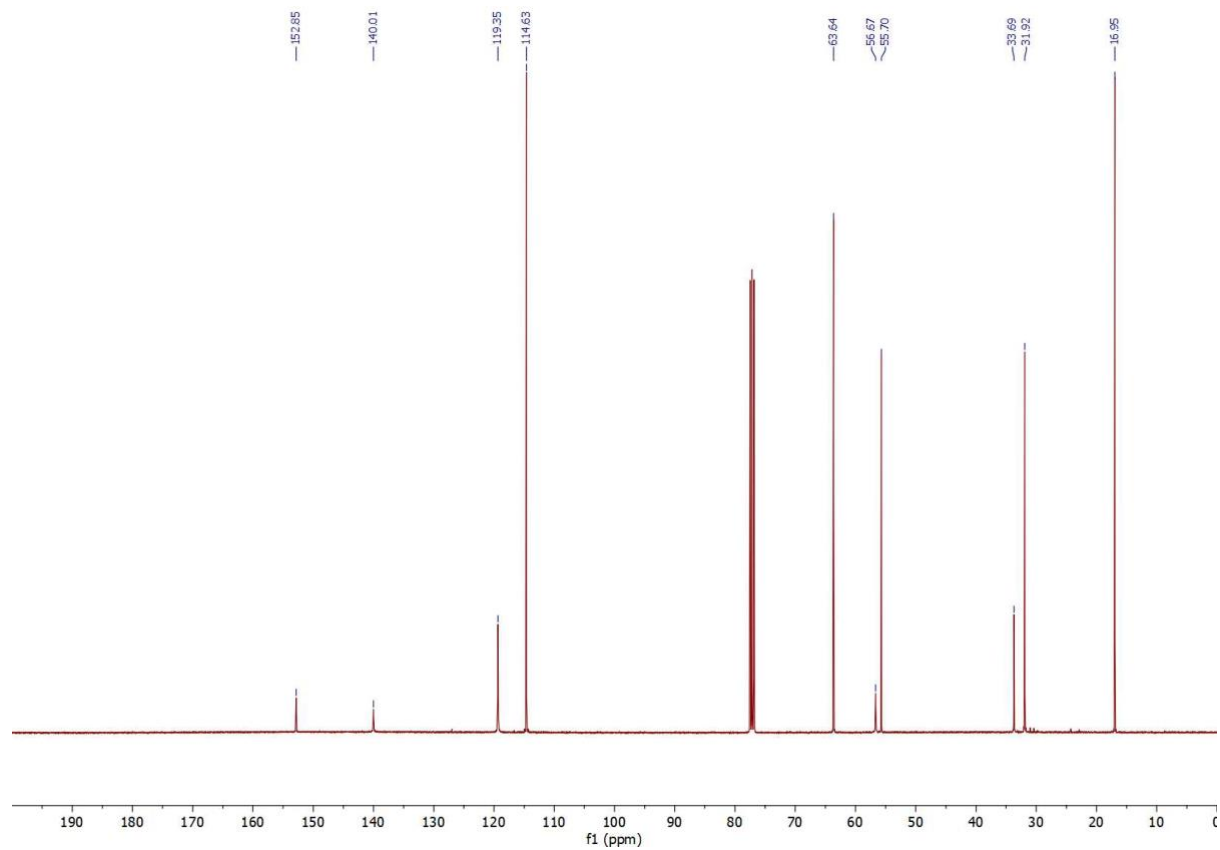

### 4-isopropyl-N-(4-methoxyphenyl)tetrahydro-2H-thiopyran-4-amine (19f)

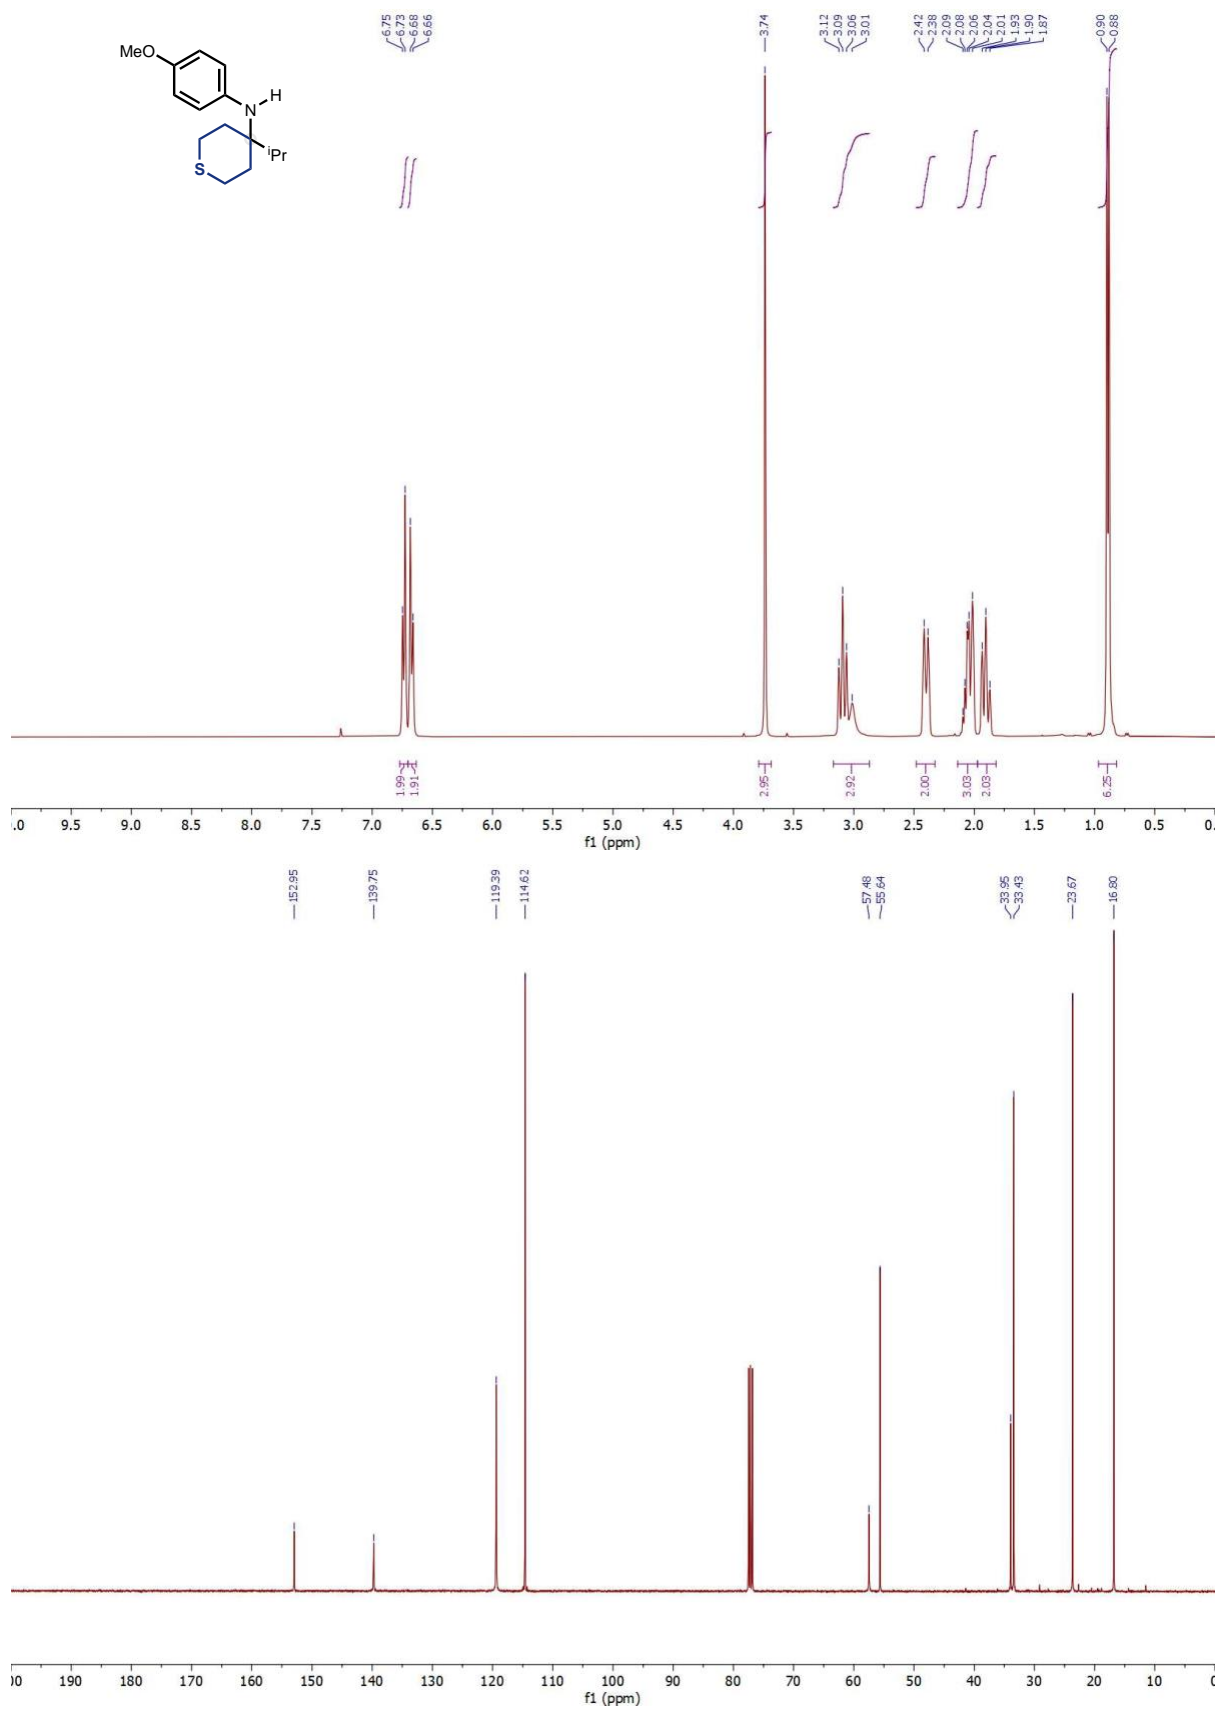

**Benzyl 4-isopropyl-4-((4-methoxyphenyl)amino)piperidine-1-carboxylate (19g)**

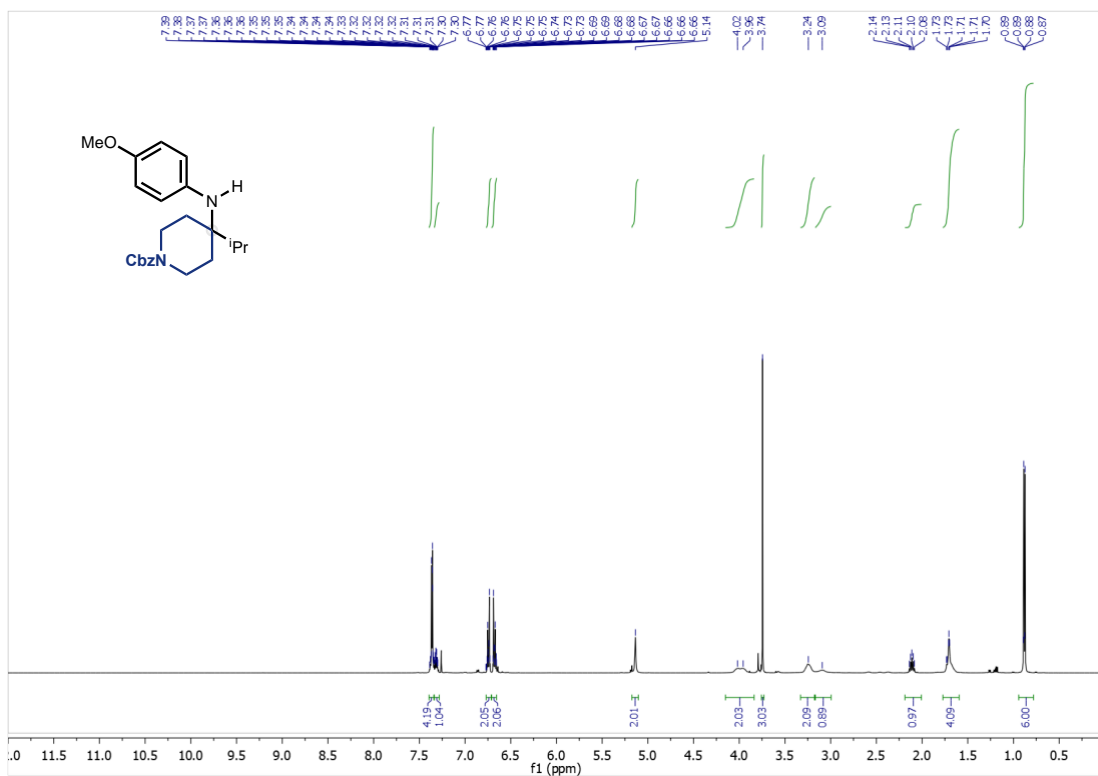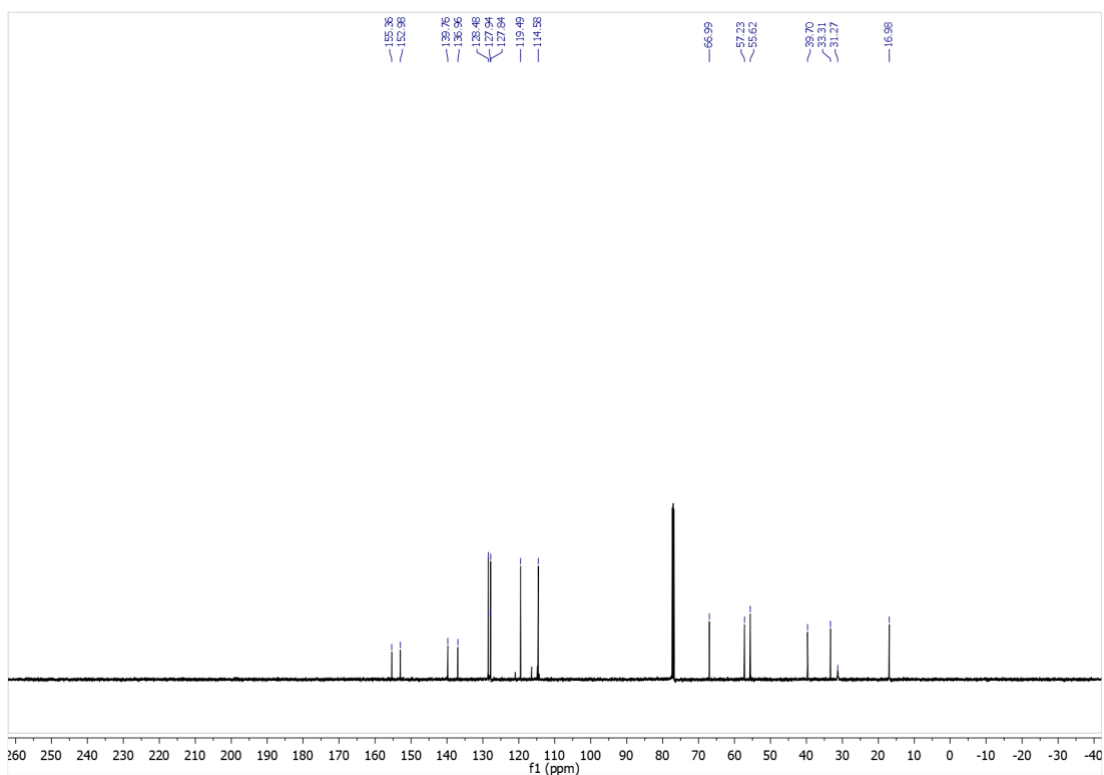

# Ethyl 3-isopropyl-3-((4-methoxyphenyl)amino)cyclobutane-1-carboxylate (19h)

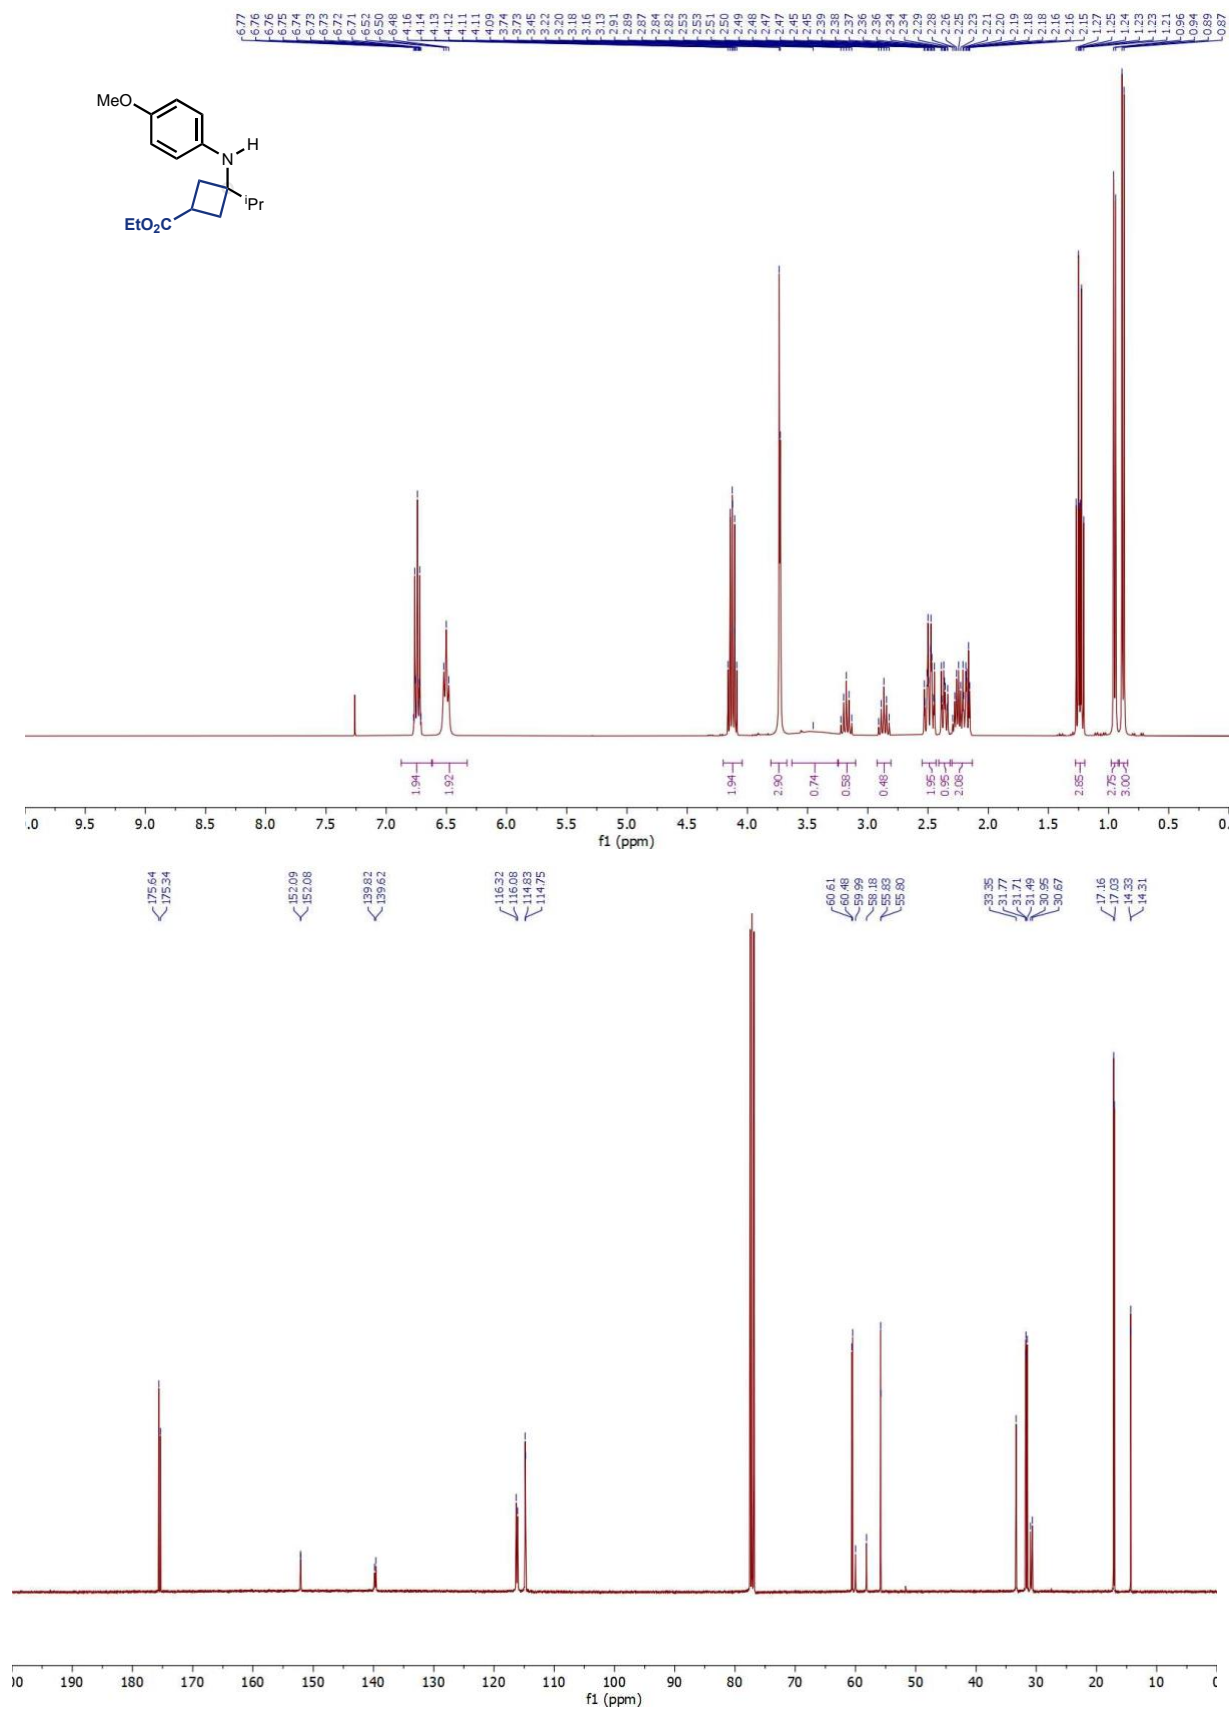

### 3-isopropyl-N-(4-methoxyphenyl)oxetan-3-amine (19i)

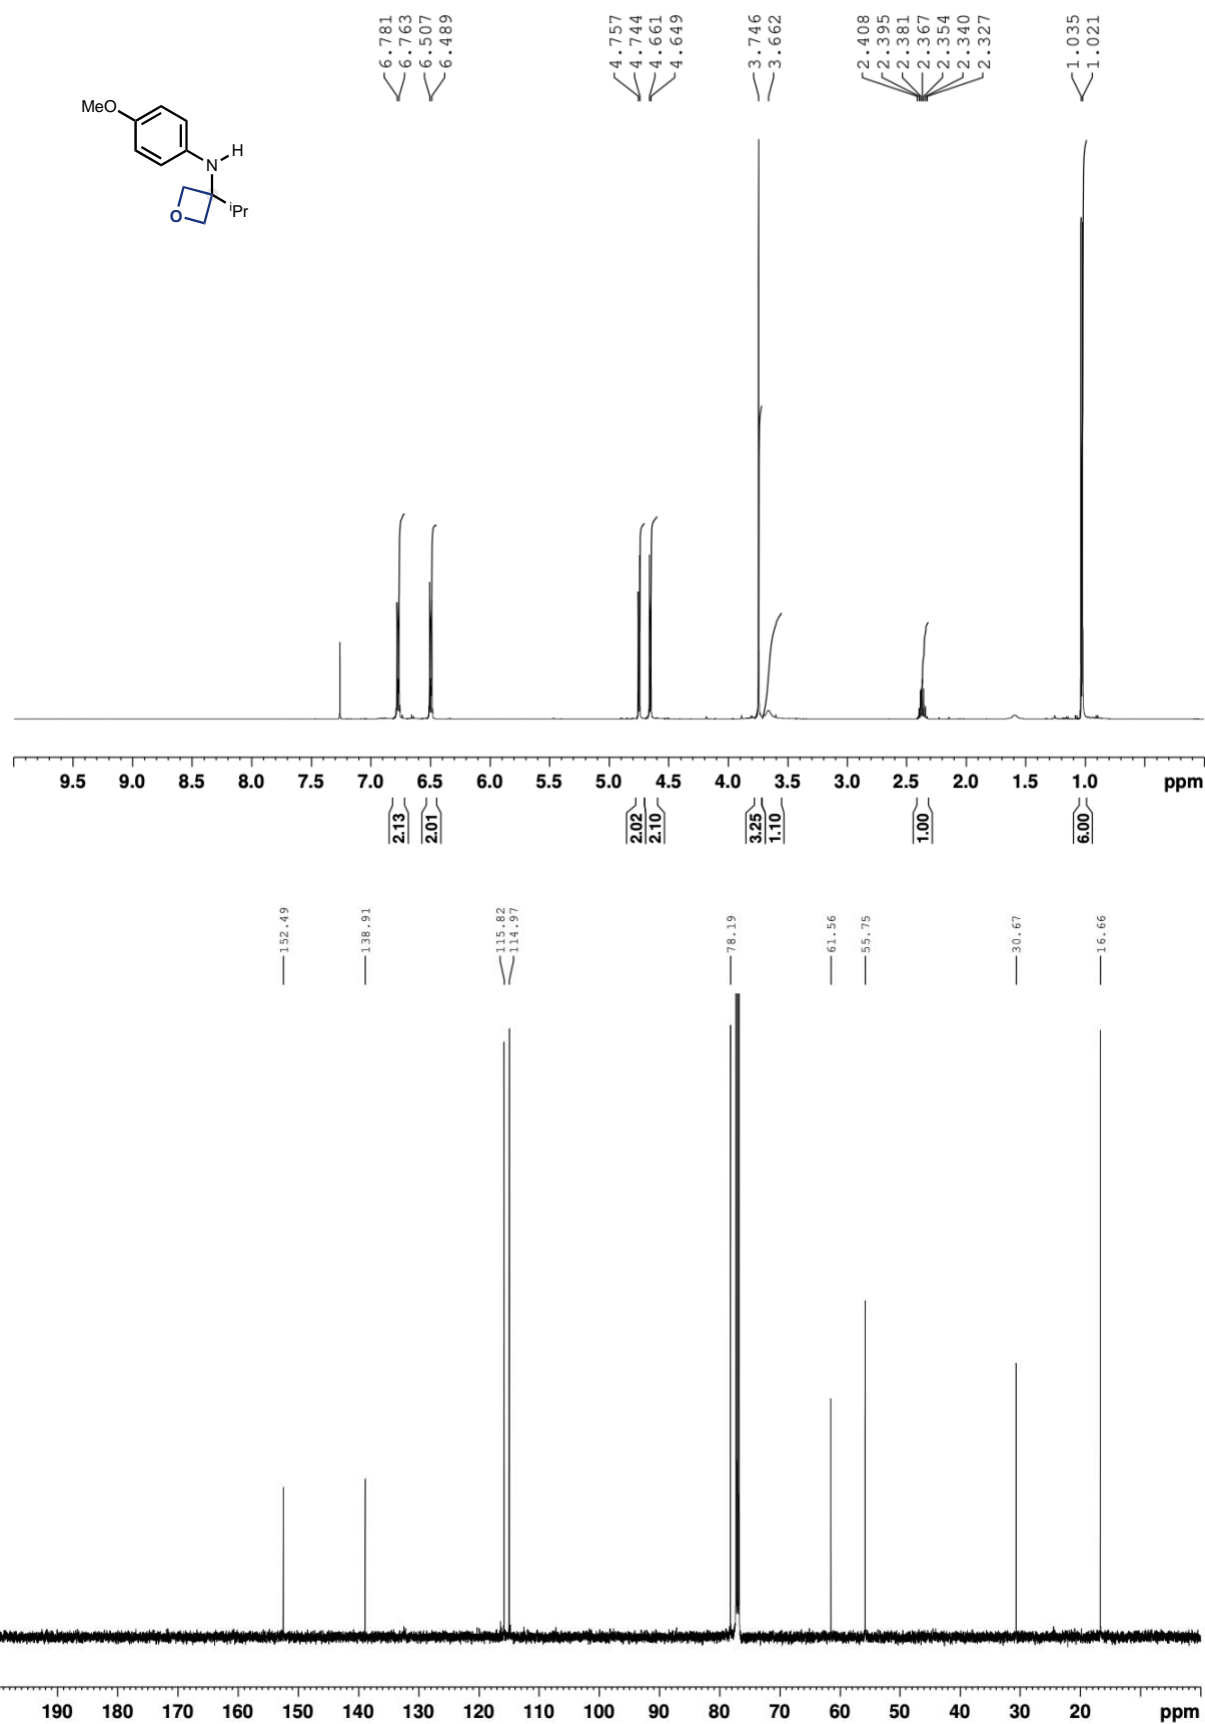



**N-(2,3-dimethylhexan-3-yl)-4-methoxyaniline (20a)**

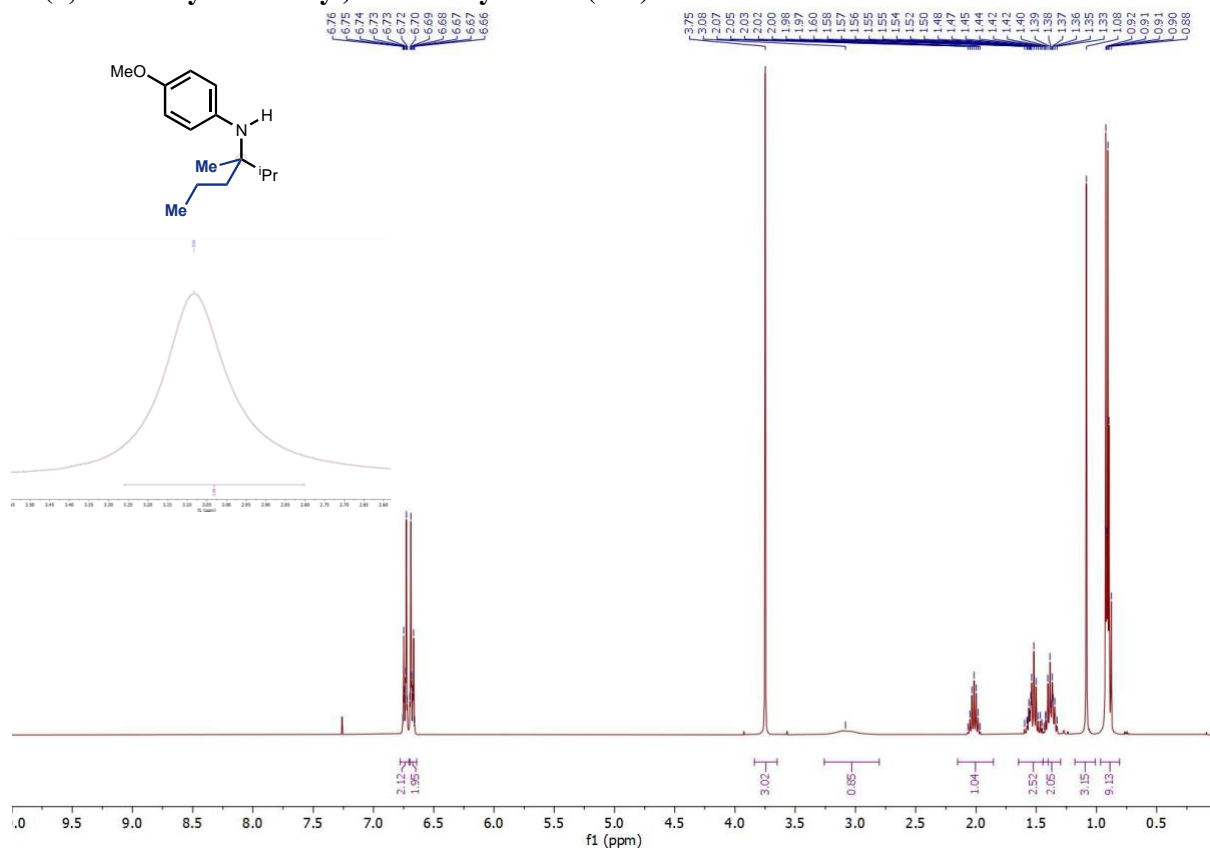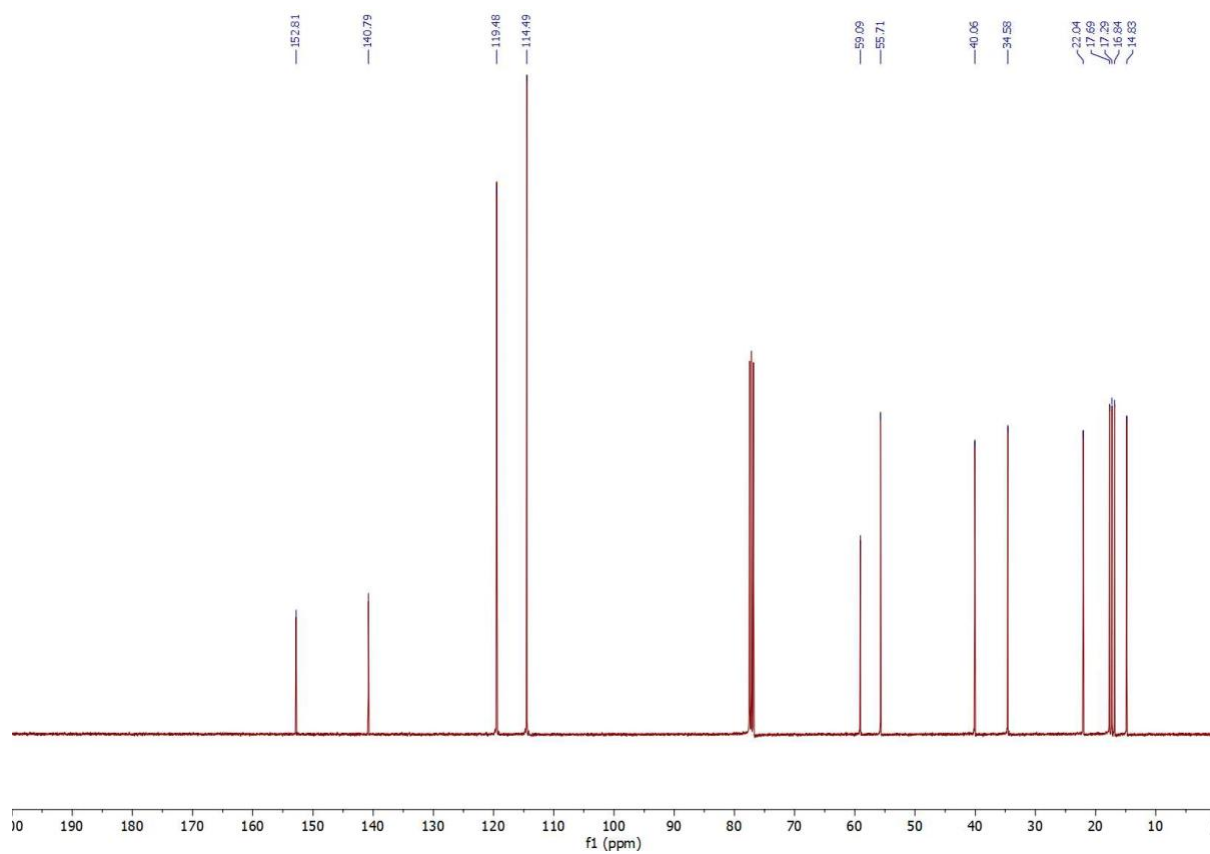

**N-(3,4-dimethyl-1-phenylpentan-3-yl)-4-methoxyaniline (20b)**

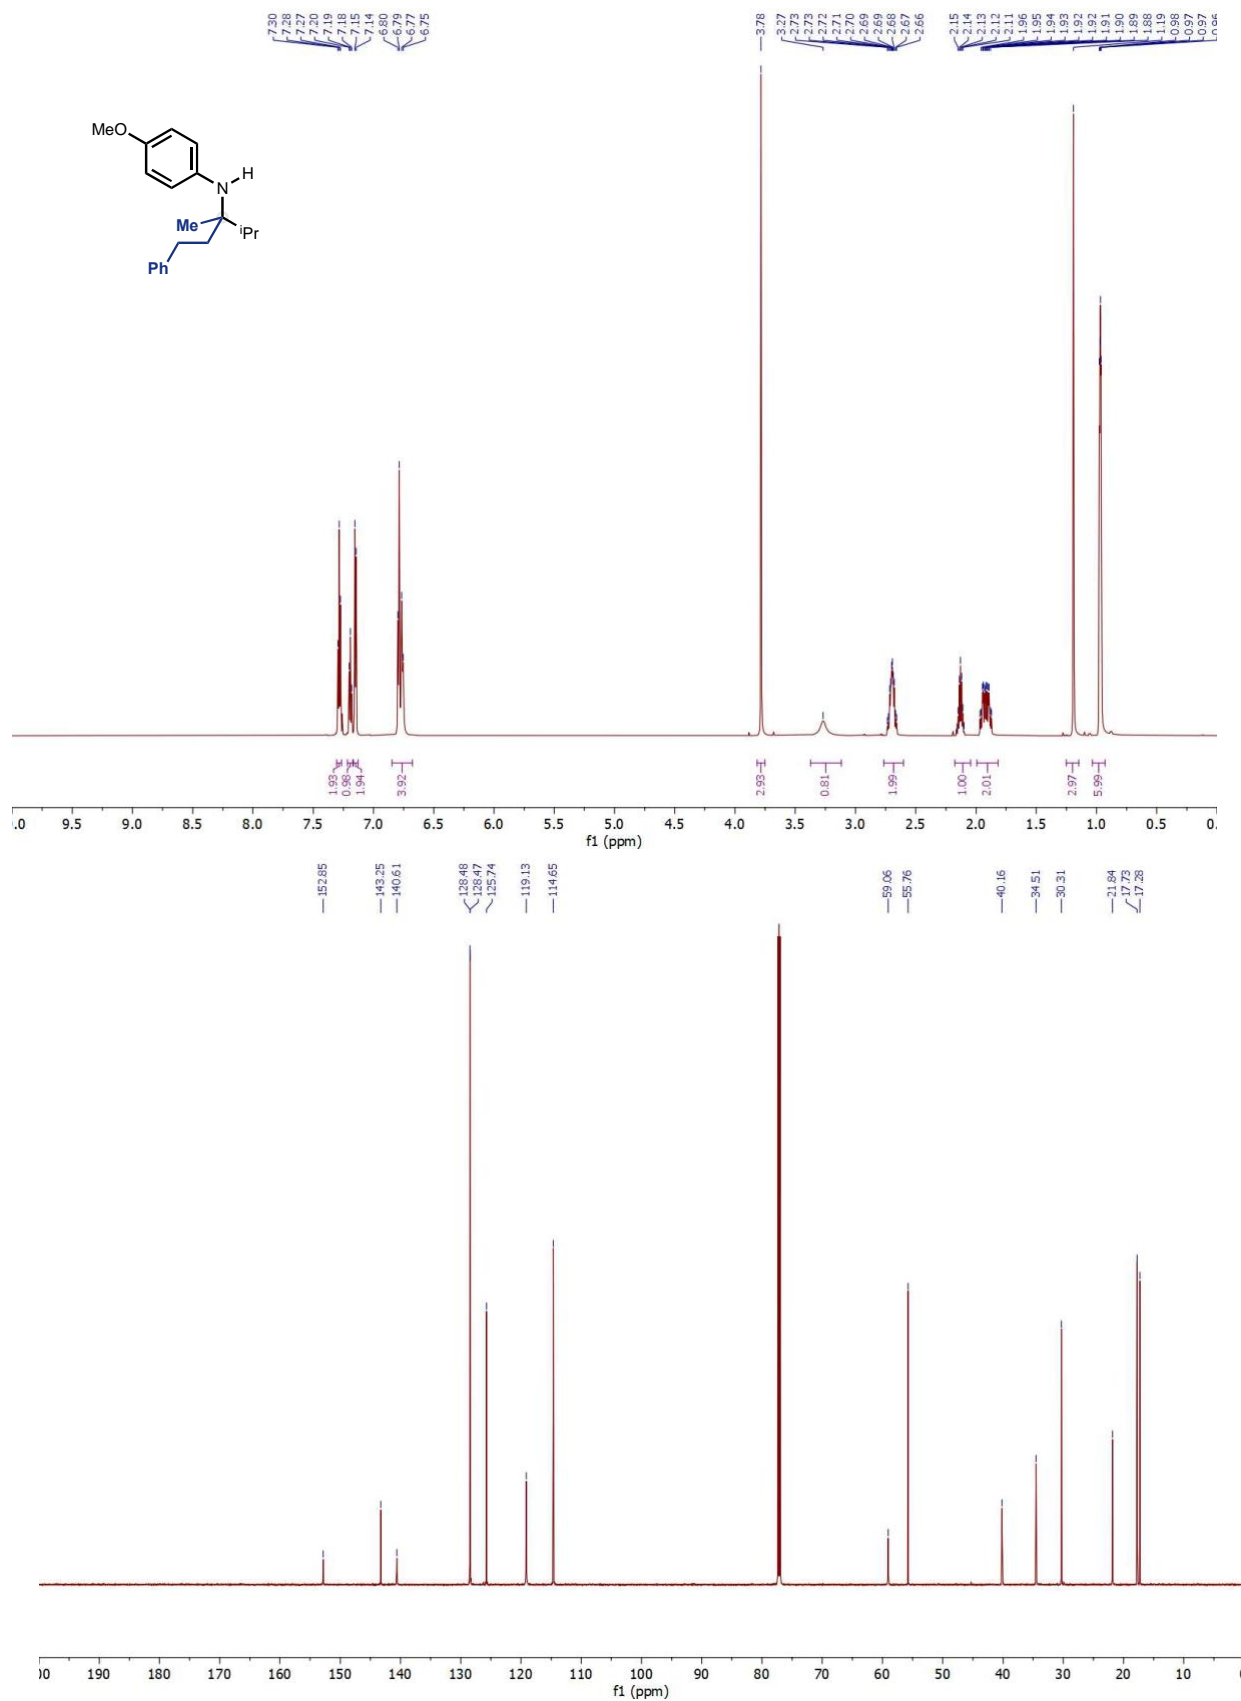

# 3,4-dimethyl-1-phenylpentan-3-amine

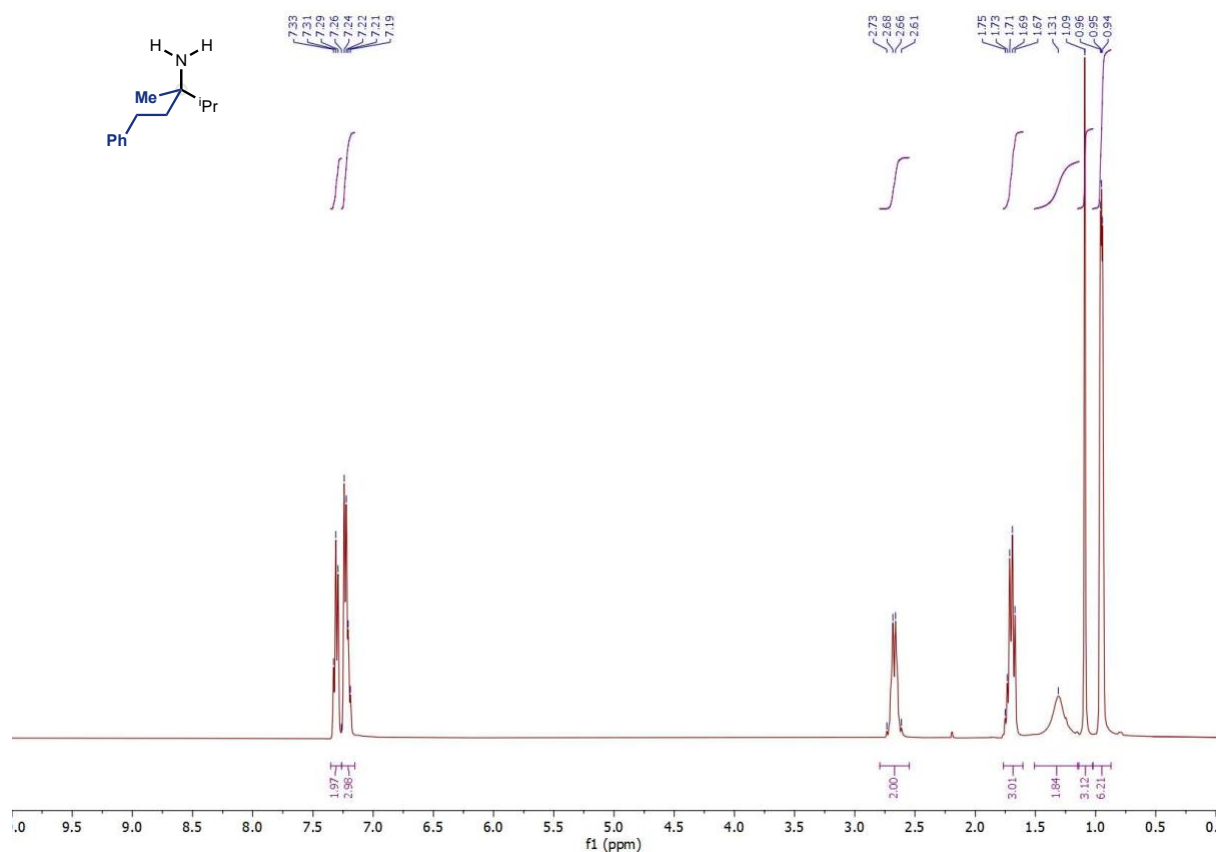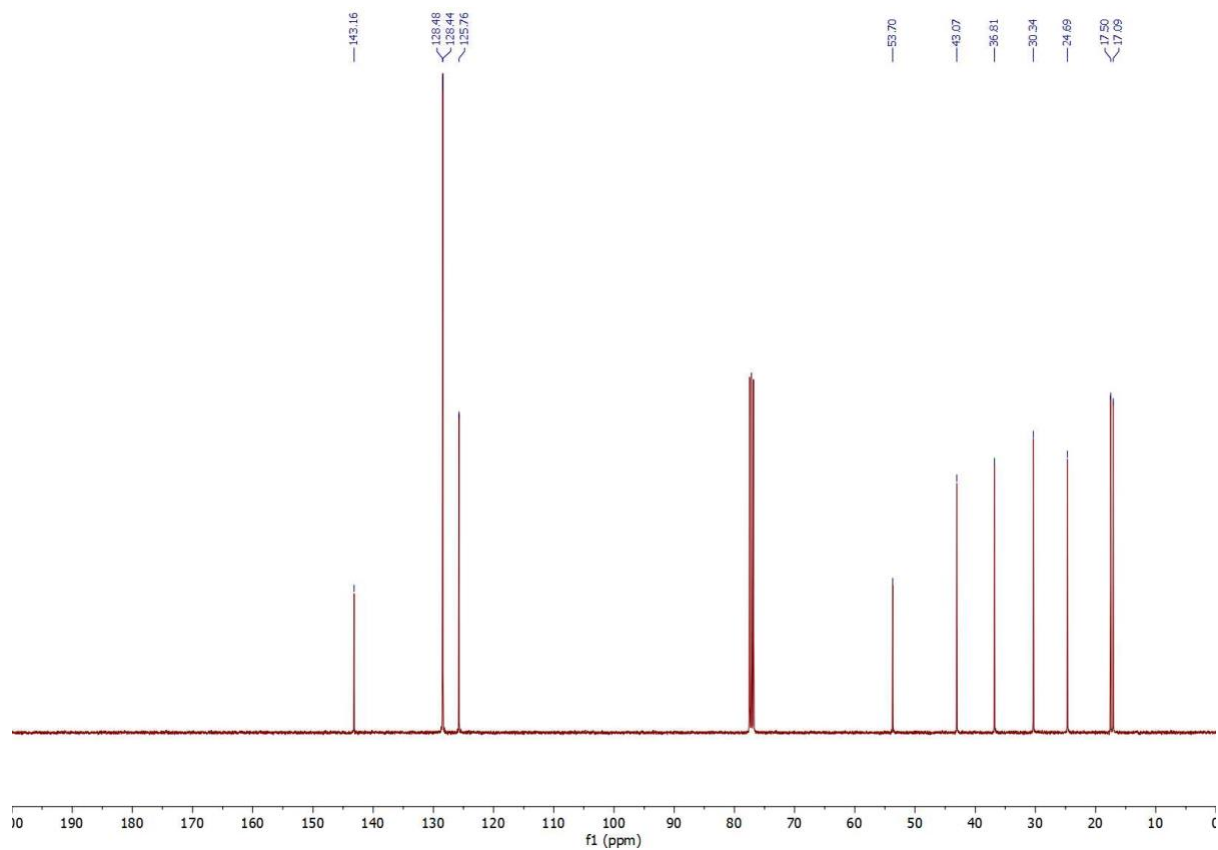

**N-(2,3-dimethylhept-6-en-3-yl)-4-methoxyaniline (20c)**

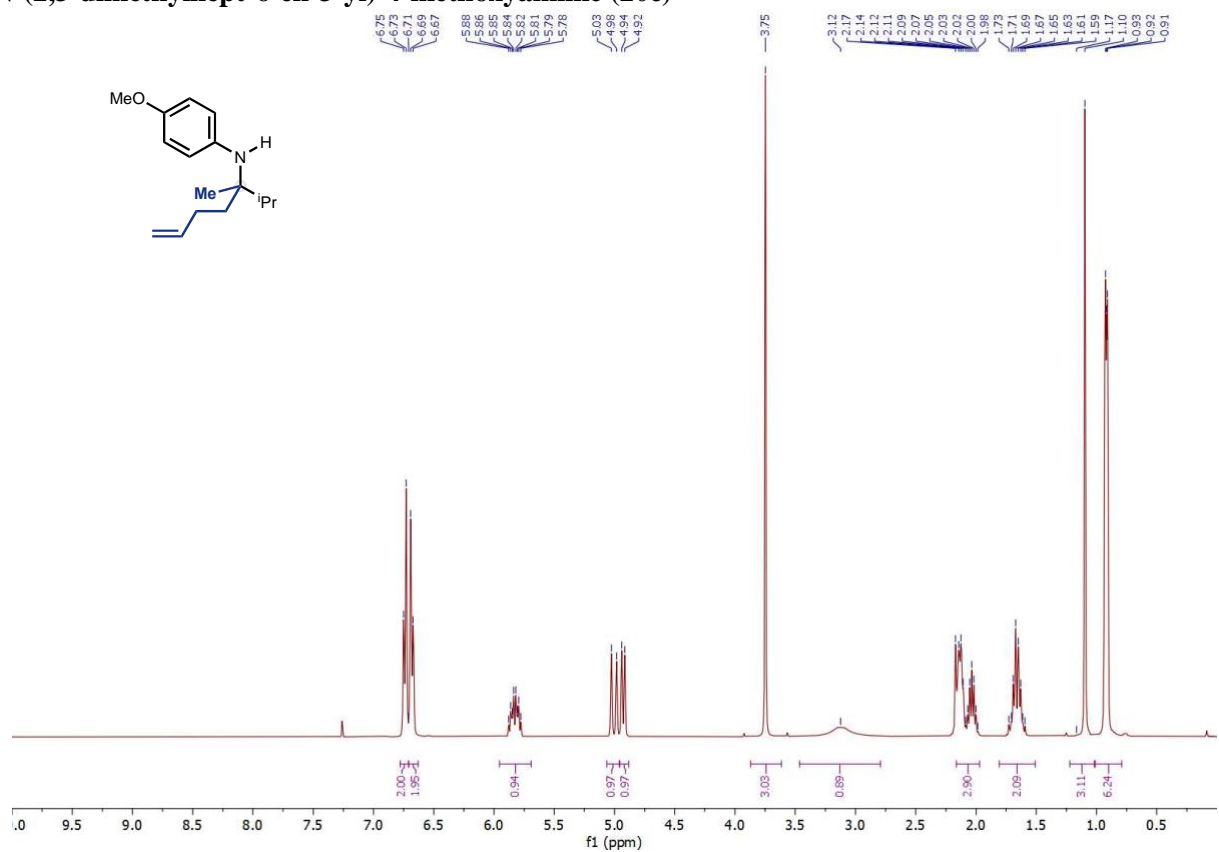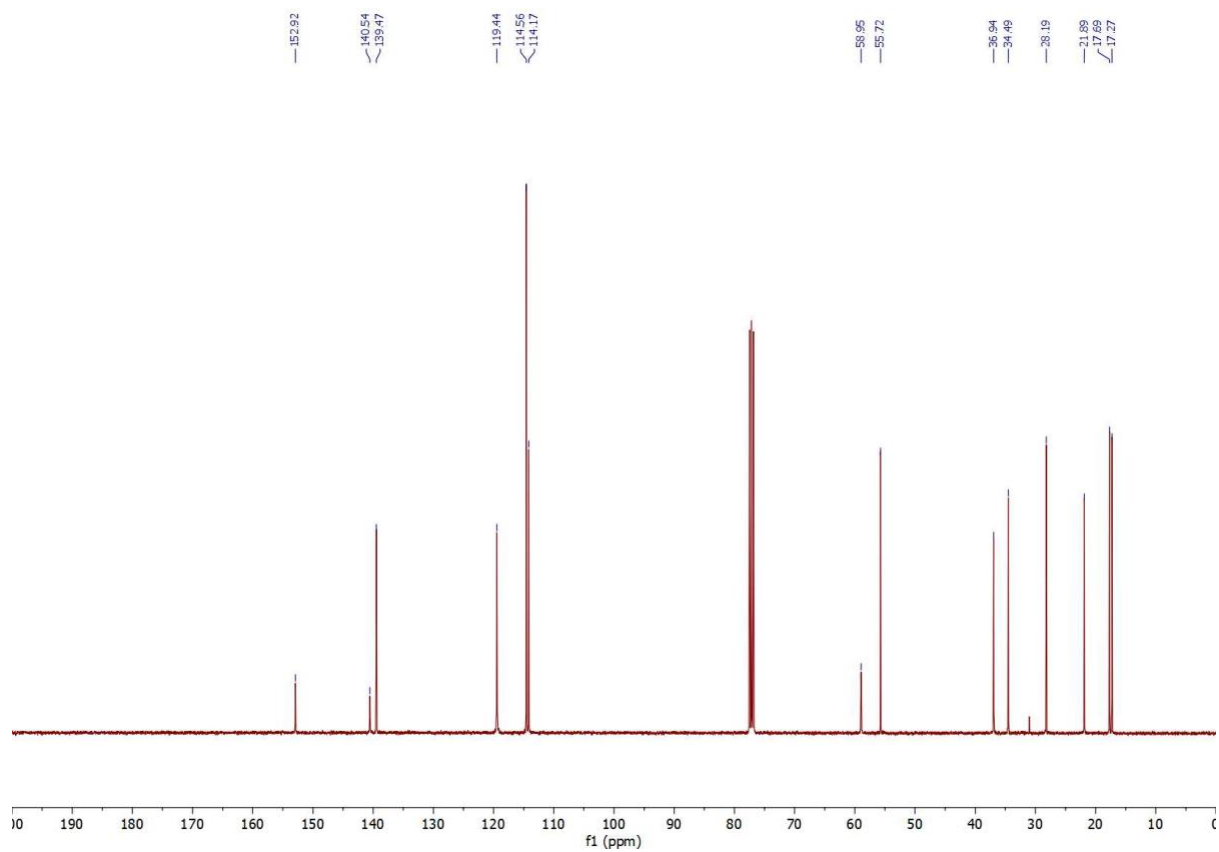

**Ethyl 5-((4-methoxyphenyl)amino)-5,6-dimethylheptanoate (20d)**

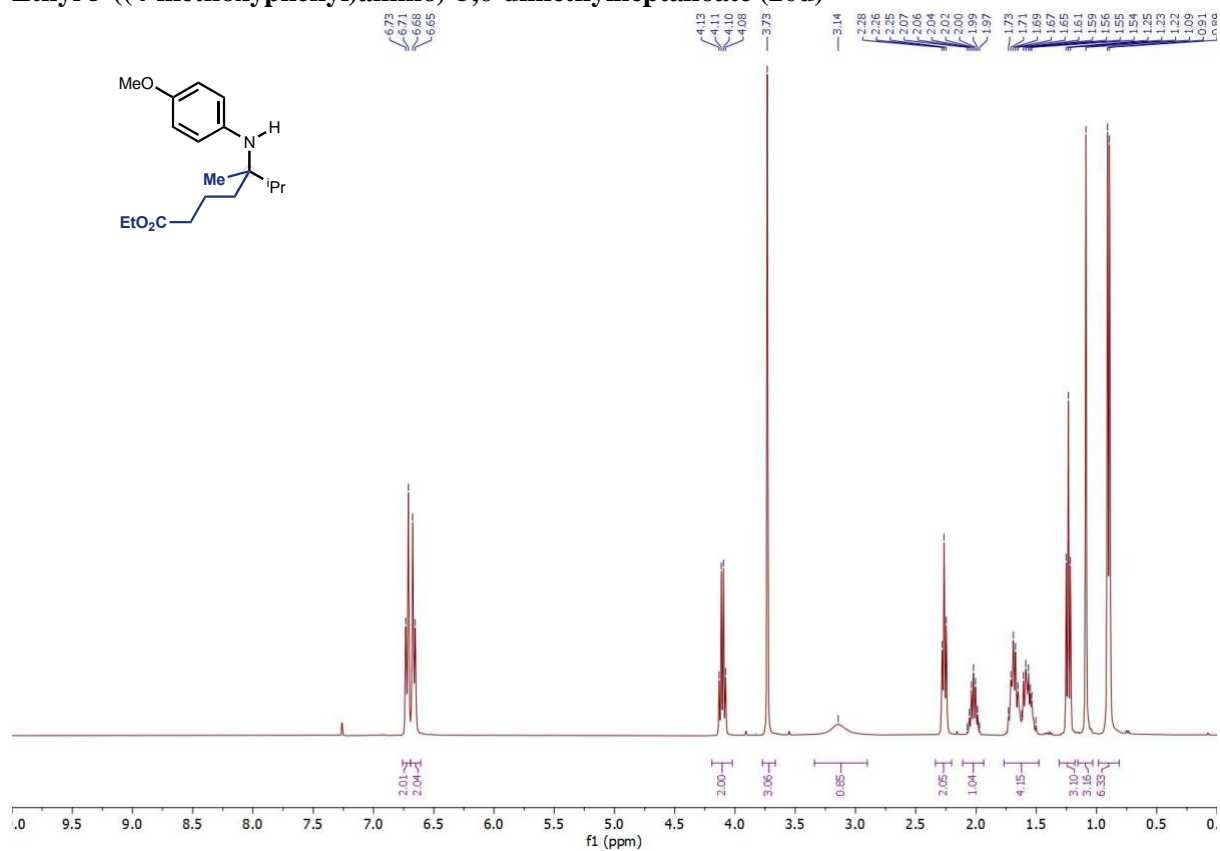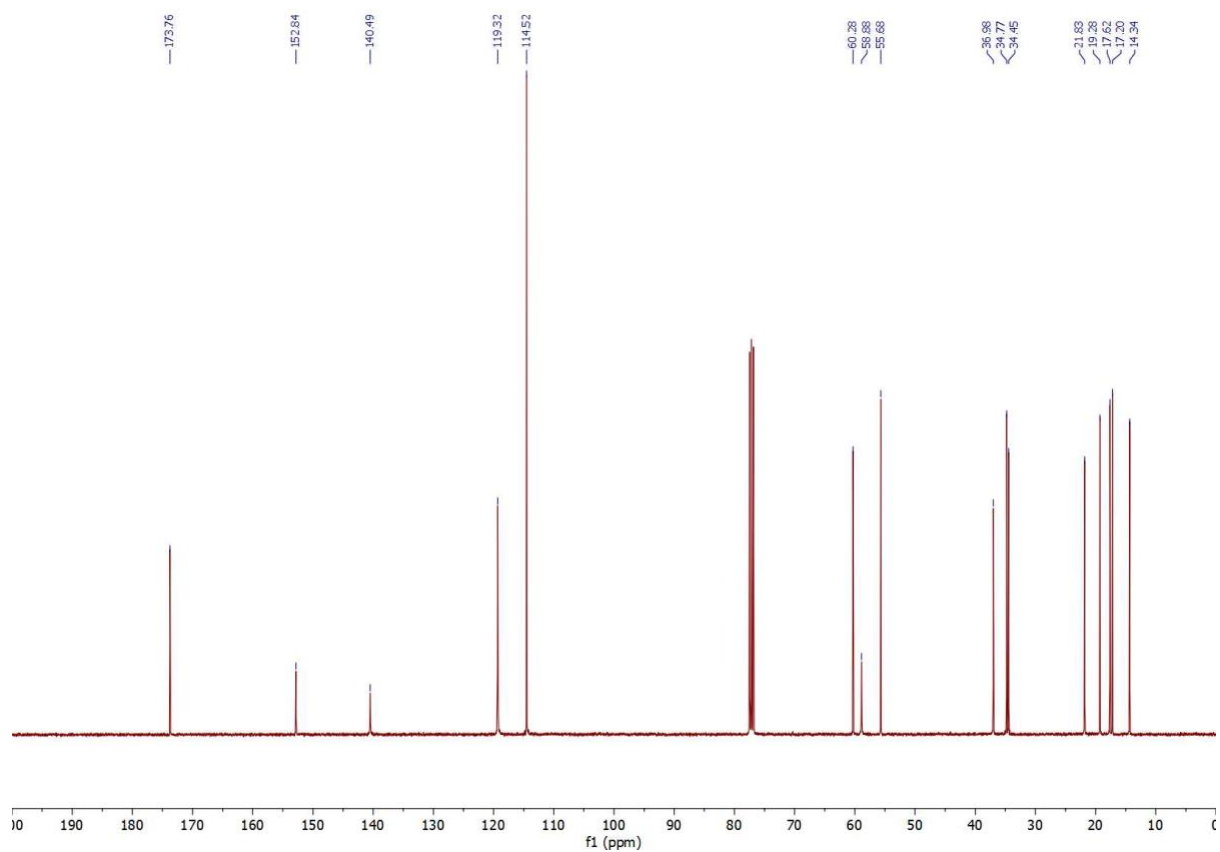

# N-(4-methoxyphenyl)heptan-4-imine

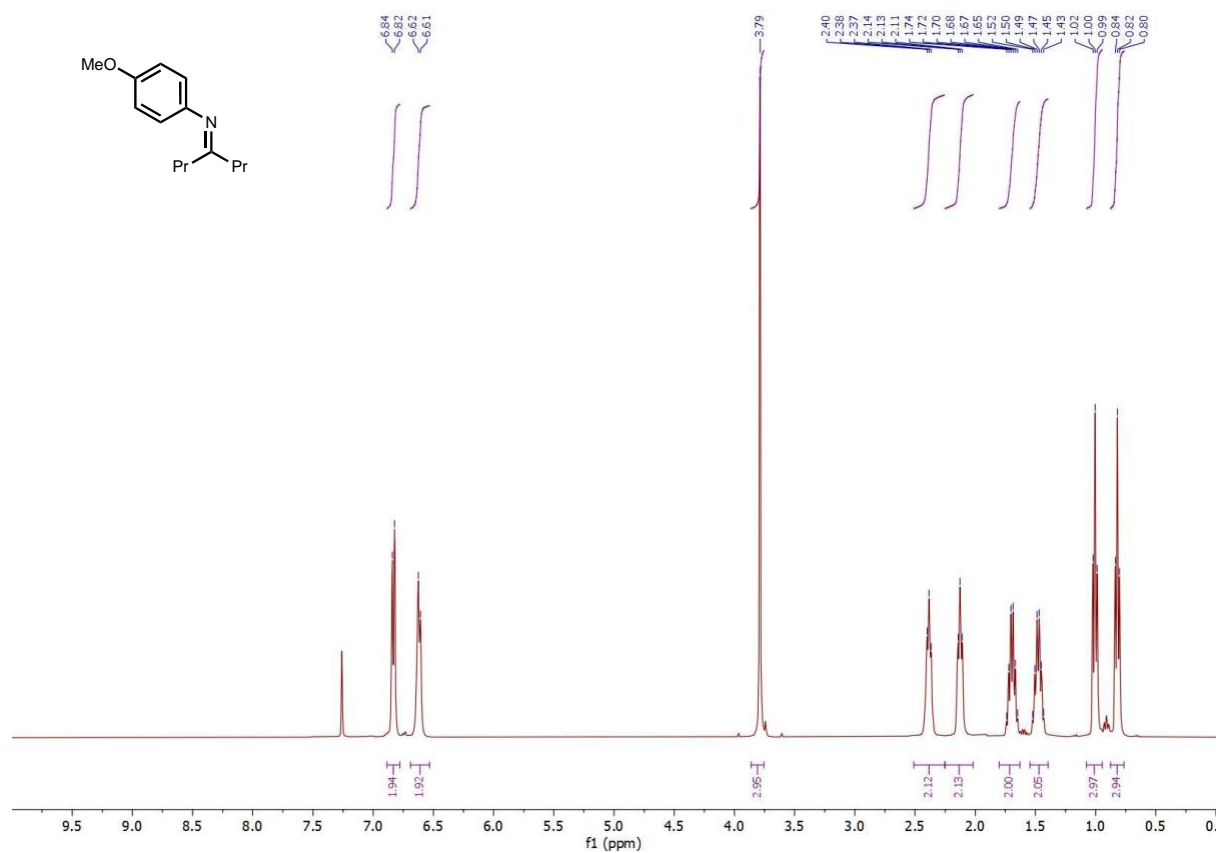

**N-(4-isopropylheptan-4-yl)-4-methoxyaniline (20e)**

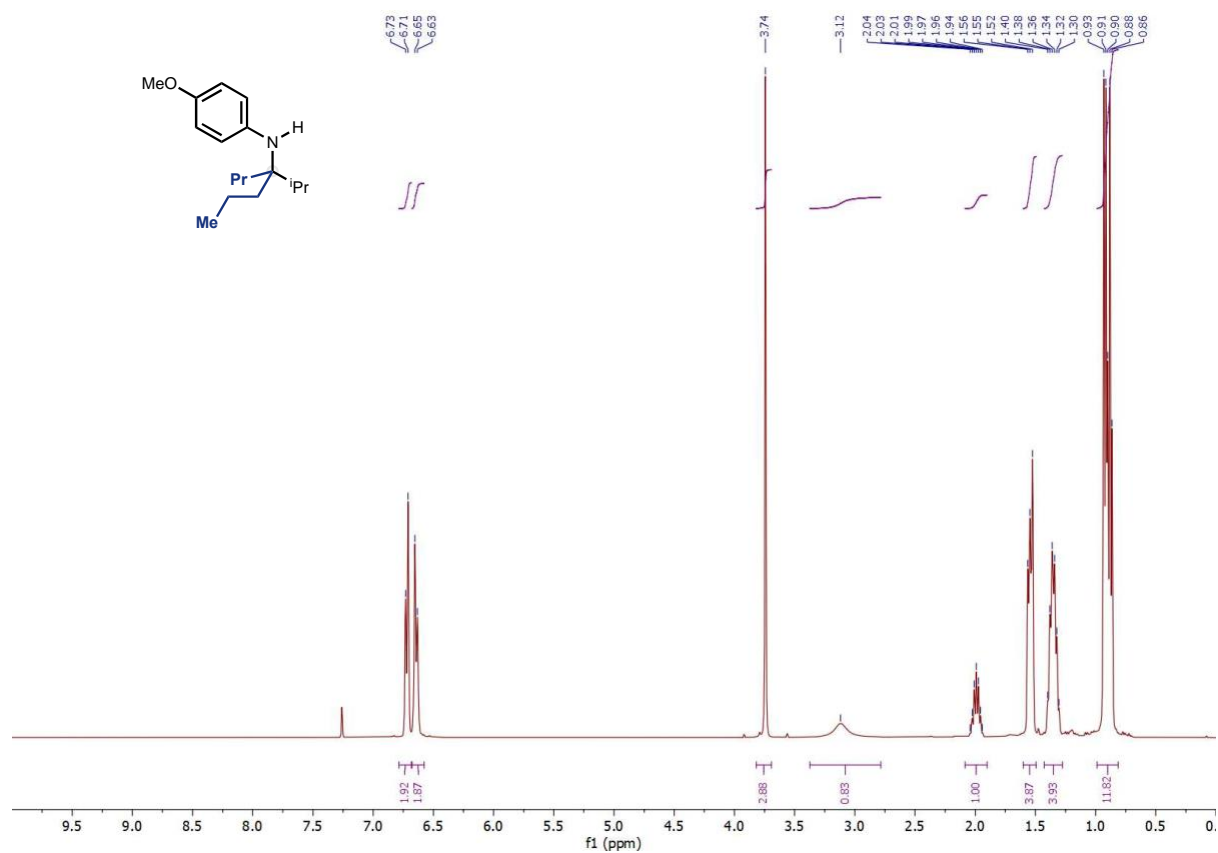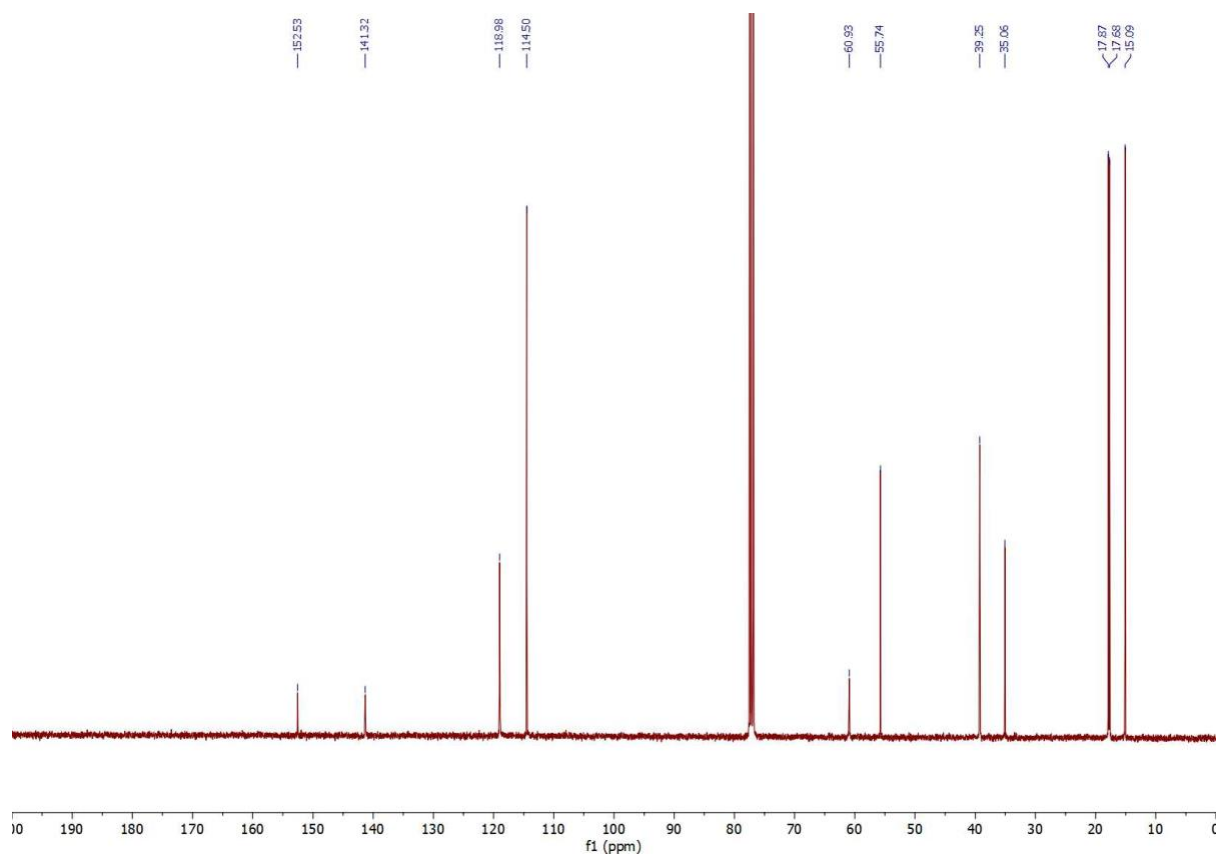

**N-(2,3-dimethylpentan-2-yl)-4-methoxyaniline (21a)**

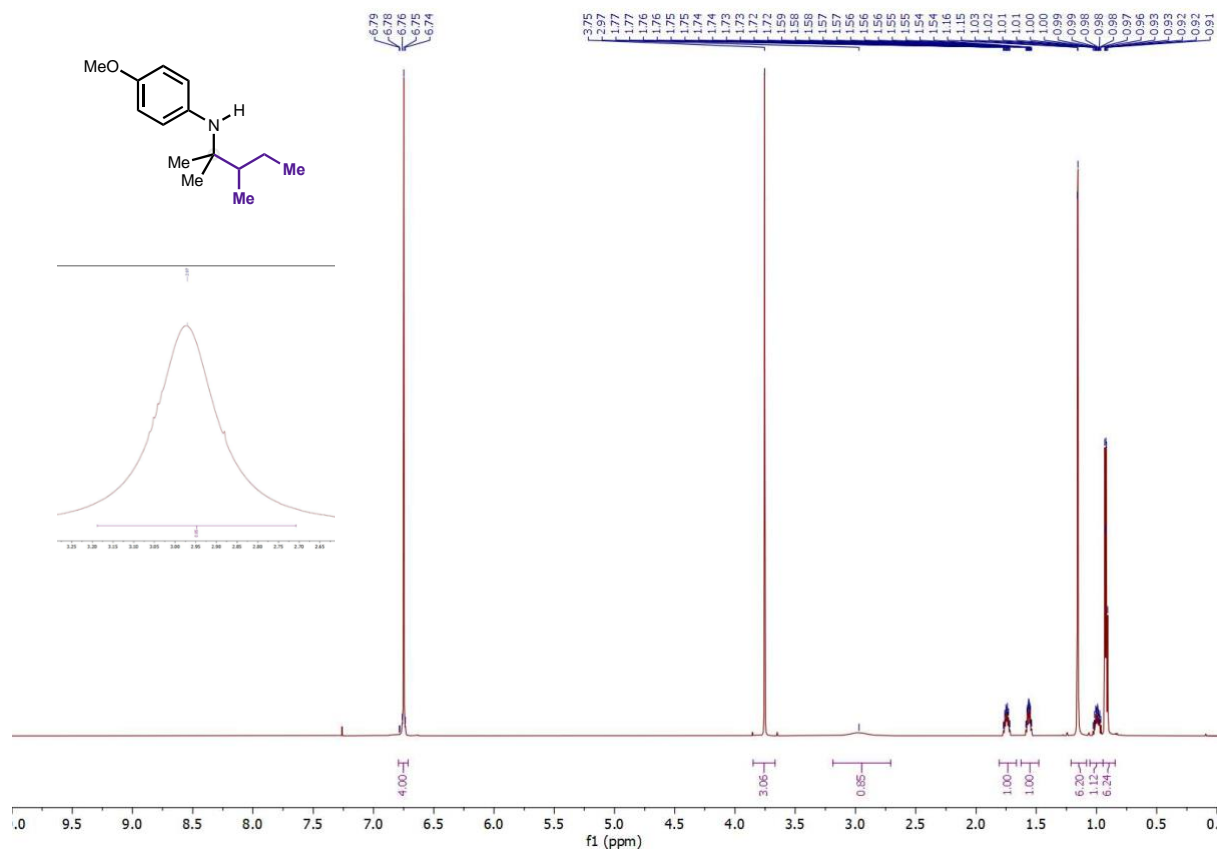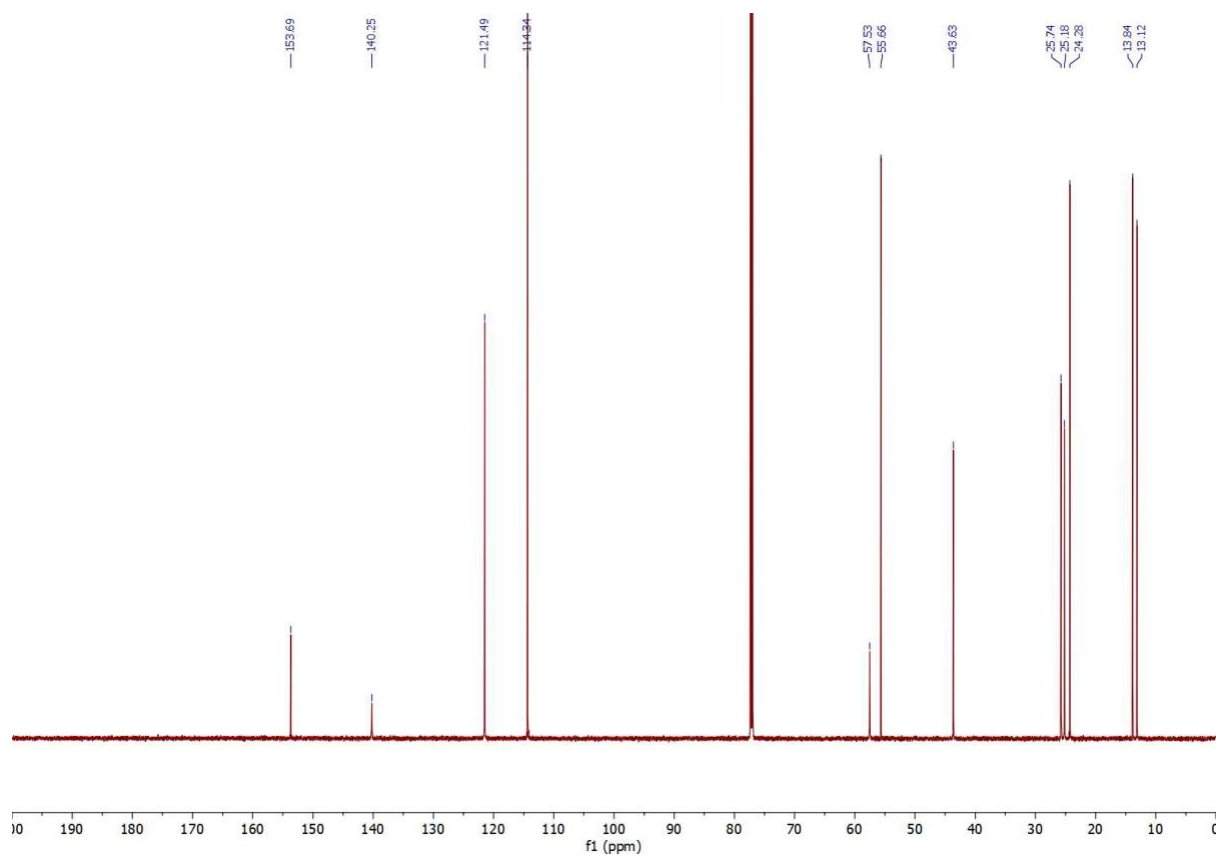



**N-(2-cyclopentylpropan-2-yl)-4-methoxyaniline (21b)**

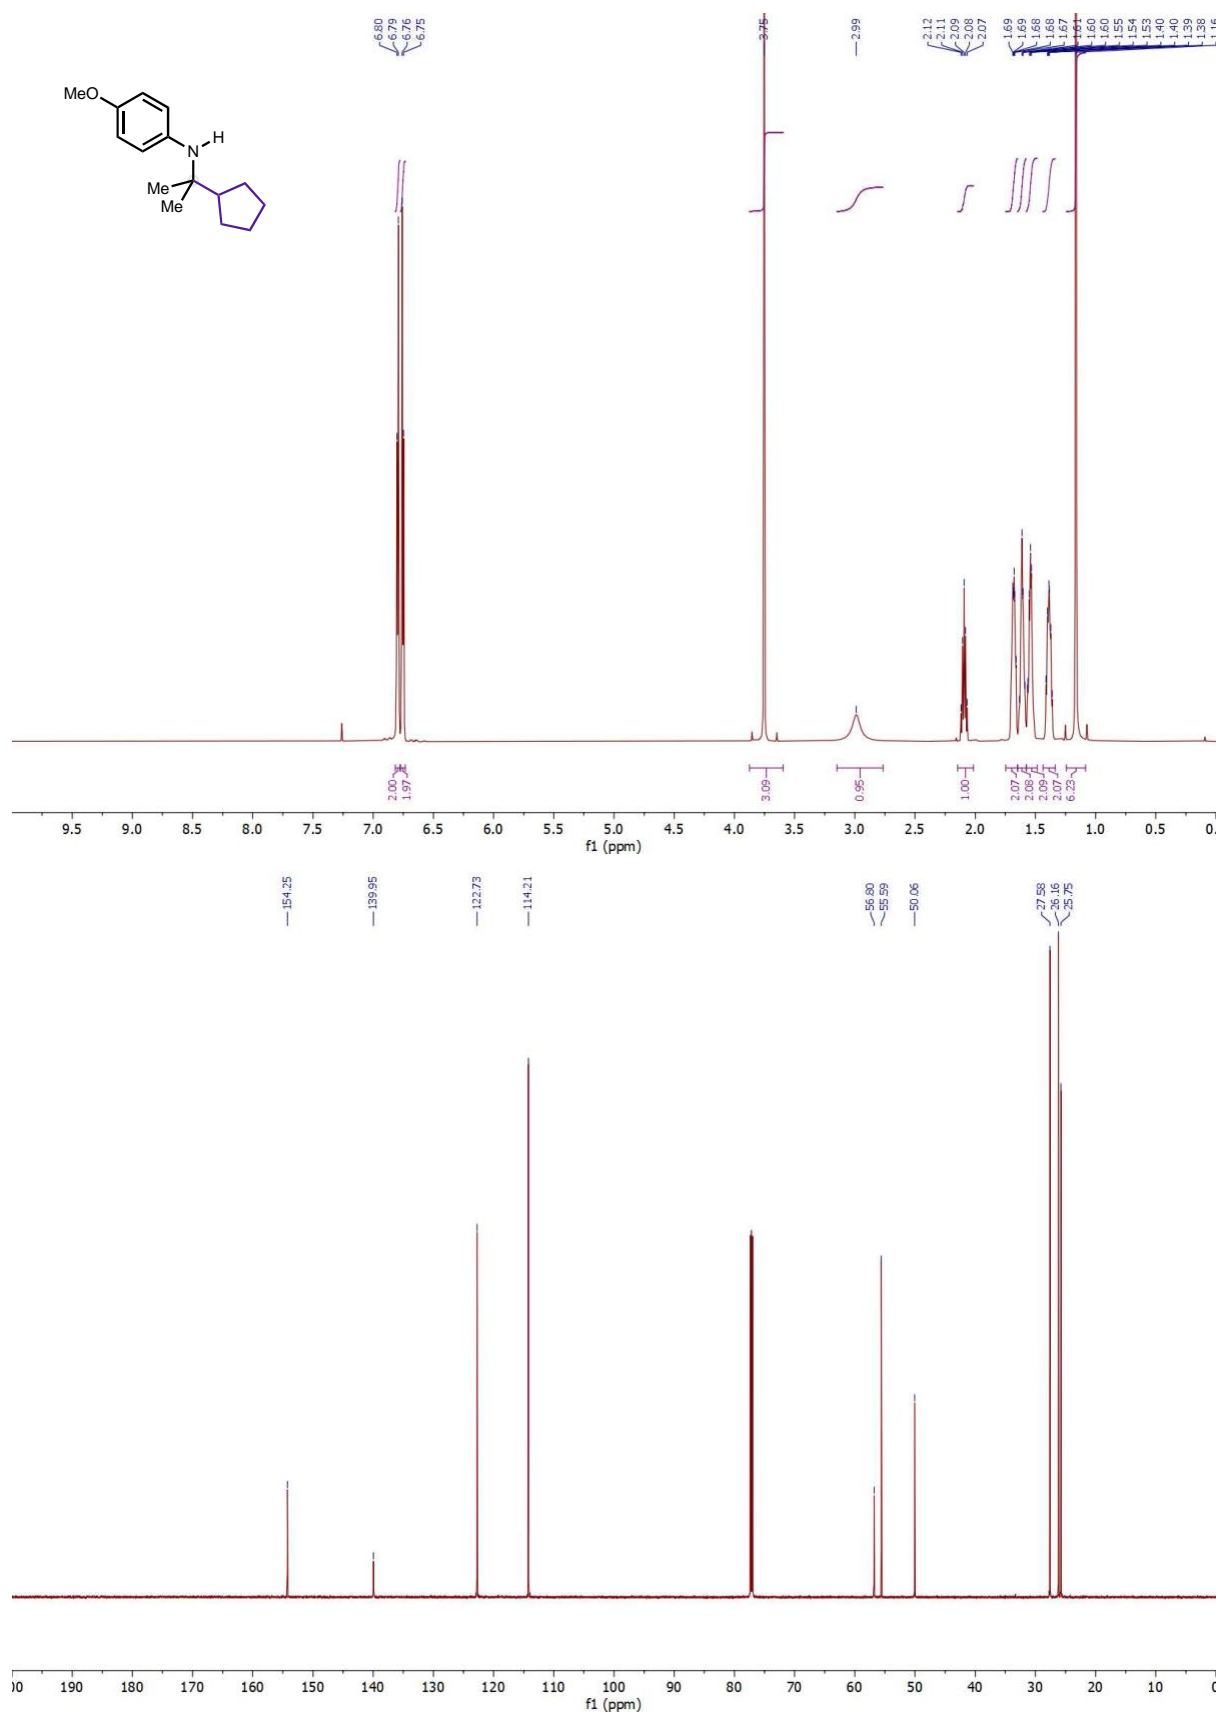

**N-(2-(2,3-dihydro-1H-inden-2-yl)propan-2-yl)-4-methoxyaniline (21c)**

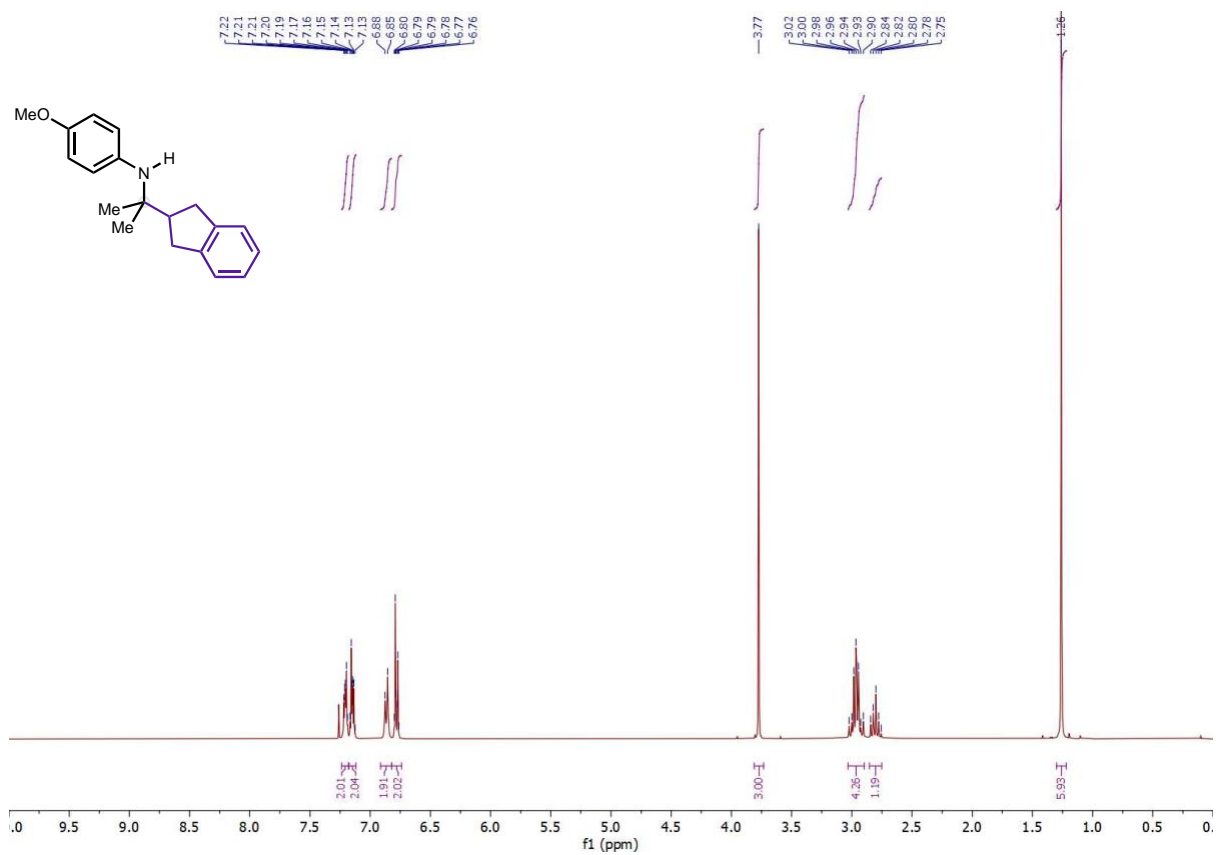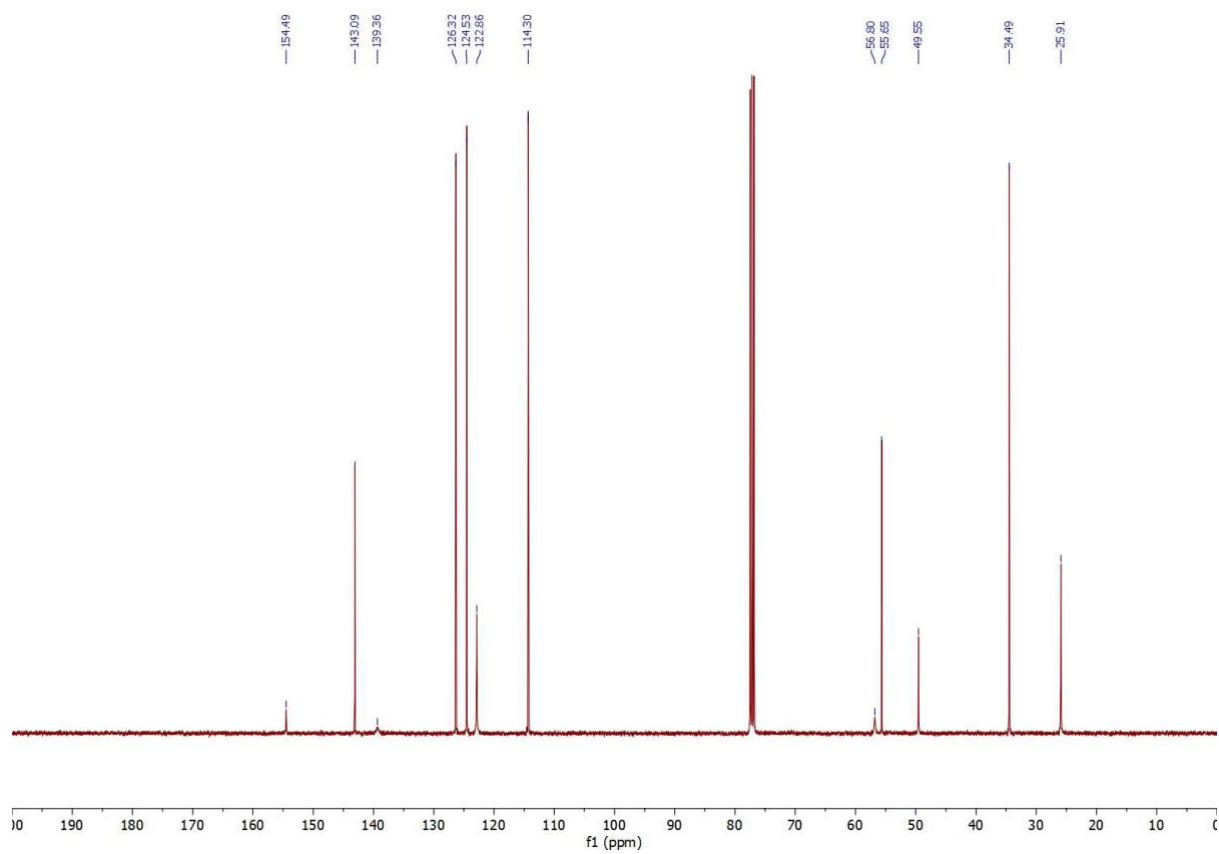

4-methoxy-N-(2-methylpentan-2-yl)aniline (21d)

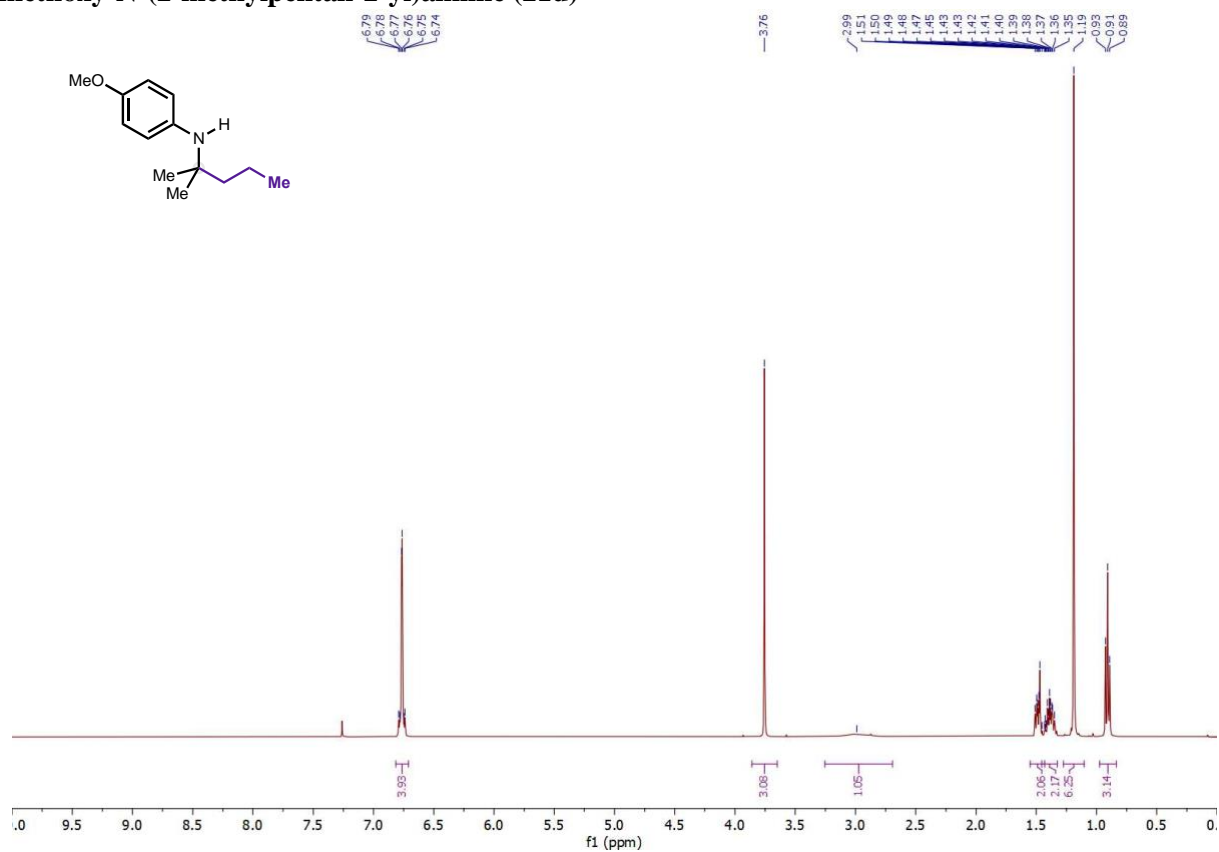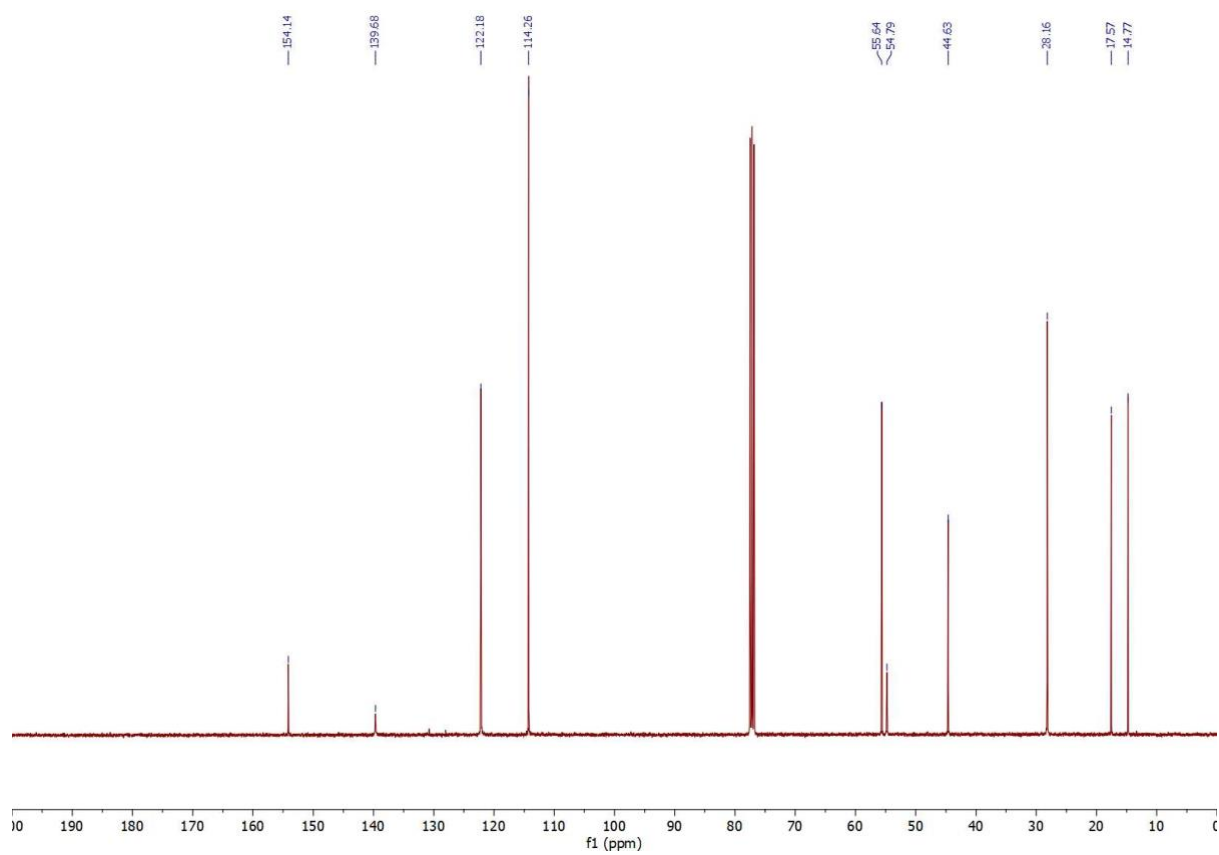

# N-benzyl-N-(1-phenylpentan-3-yl)cyclopropanamine

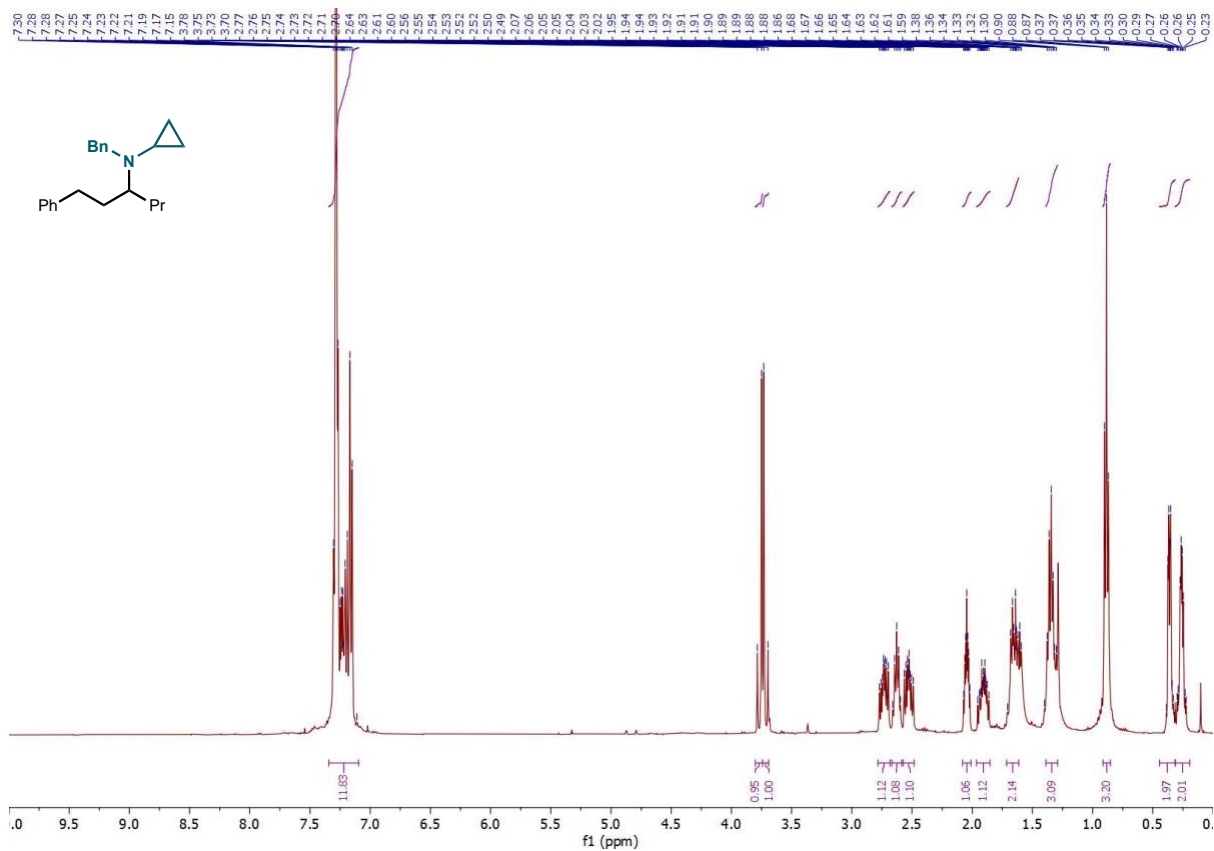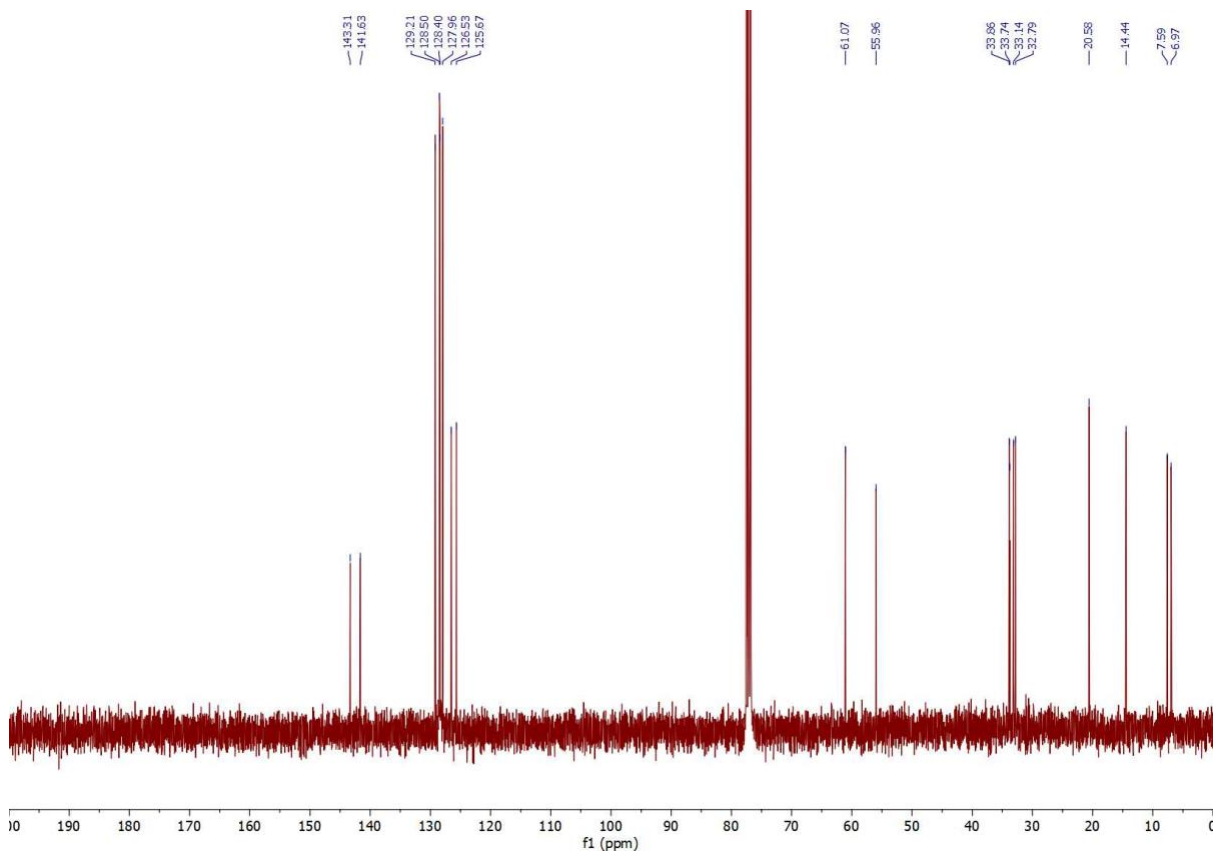

# N-benzyl-1-phenylpentan-3-amine

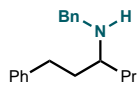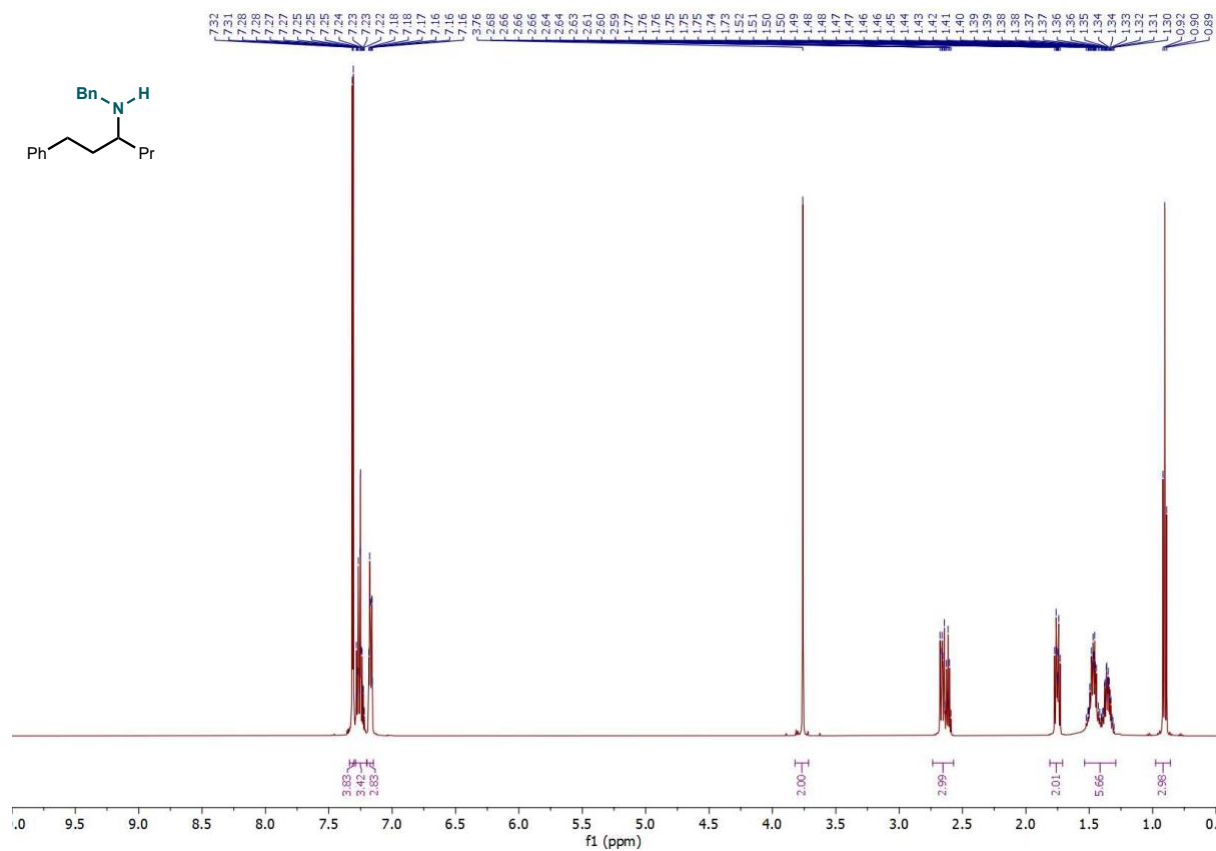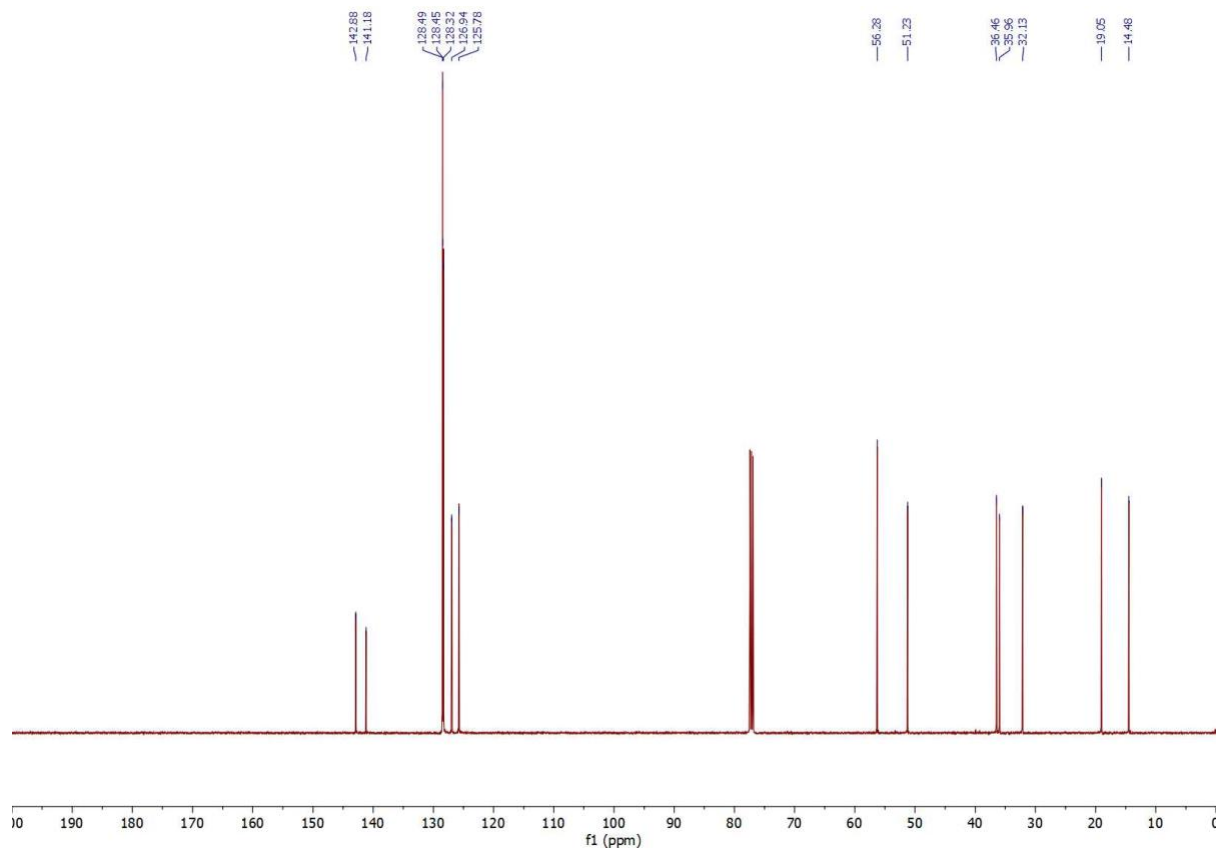

# N-benzyl-N-(4-methyl-1-phenylpentan-3-yl)cyclopropanamine

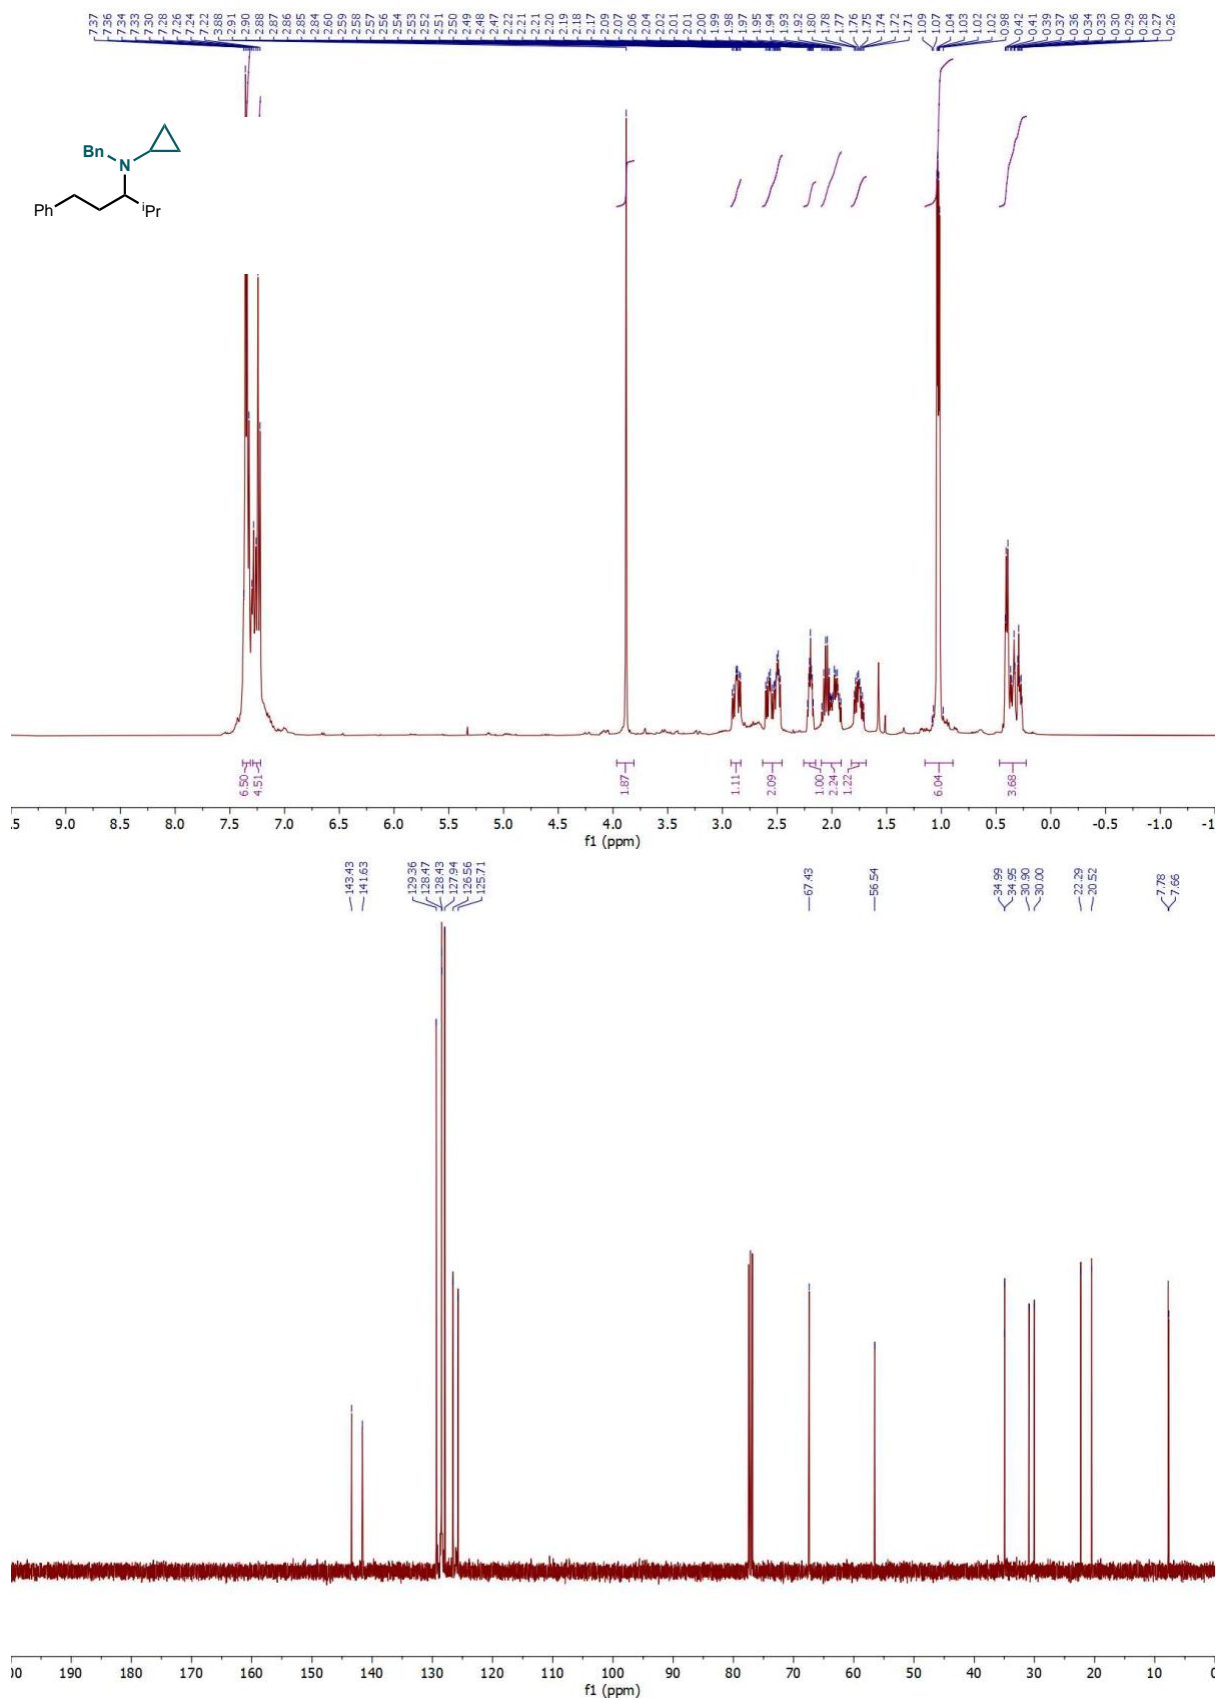

Supplement: ja3c14037_si_001.pdf [file ja3c14037_si_001.pdf]
